# Supplementary material
Source: publisher figshare collection journal article supplement (https://sage.figshare.com/ndownloader/files/14963900)
Supplement: Supplementary file 1 [file 14963900]

**Norge**

**Elisabeth Ivarsflaten, Koordinator, Universitet i Bergen  
Sveinung Arnesen, Bjarte Folkestad, Endre Tvinnereim, Åsta Dyrnes  
Nordø, Mikael Poul Johannesson, Erik Knudsen, Nina Serdarevic,  
Vitenskapelig team, Universitet i Bergen og UNI Research Rokkansenteret**

## **Norsk medborgerpanel 2016**

### **Study Documentation**

Desember 16, 2016

# Metadata-produksjon

|                            |                                                                                                                                                         |
|----------------------------|---------------------------------------------------------------------------------------------------------------------------------------------------------|
| <b>Metadataprodusenter</b> | Asle Høgestøl , ideas2evidence , Koordinator<br>Øivind Skjervheim , ideas2evidence , Koordinator<br>Jostein Ryssevik , ideas2evidence , Kvalitetssikrer |
| <b>Produksjonsdato</b>     | Desember 4, 2016                                                                                                                                        |
| <b>Identifisering</b>      | NMP-16-2                                                                                                                                                |

# Innholdsfortegnelse

|                                                     |                    |
|-----------------------------------------------------|--------------------|
| <a href="#">Oversikt.....</a>                       | <a href="#">4</a>  |
| <a href="#">Omfang.....</a>                         | <a href="#">4</a>  |
| <a href="#">Produsenter og sponsorer.....</a>       | <a href="#">4</a>  |
| <a href="#">Utvalg.....</a>                         | <a href="#">4</a>  |
| <a href="#">Datainnsamling.....</a>                 | <a href="#">5</a>  |
| <a href="#">Filbeskrivelse.....</a>                 | <a href="#">6</a>  |
| <a href="#">Norsk medborgerpanel - runde 7.....</a> | <a href="#">6</a>  |
| <a href="#">Variabelliste.....</a>                  | <a href="#">7</a>  |
| <a href="#">Norsk medborgerpanel - runde 7.....</a> | <a href="#">7</a>  |
| <a href="#">Variabelbeskrivelse.....</a>            | <a href="#">44</a> |
| <a href="#">Norsk medborgerpanel - runde 7.....</a> | <a href="#">45</a> |

## Norsk medborgerpanel 2016

### Oversikt

|                       |          |
|-----------------------|----------|
| <b>Identifisering</b> | NMP-16-2 |
|-----------------------|----------|

#### Sammendrag

Norsk medborgerpanel er en plattform for internettbaserte undersøkelser av norske medborgeres holdninger og holdningsendringer innenfor viktige saksområder i samfunn og politikk. Deltakerne er rekruttert tilfeldig fra Folkeregisteret og oppfordres til å delta over tid. Panelet gikk i felten første gang høsten 2013 og spørreundersøkelsene gjennomføres ca. 2 ganger i året. Universitetet i Bergen er eier og behandlingsansvarlig for Medborgerpanelet. Ideas 2 Evidence står bak den tekniske gjennomføringen. Data lagres og videreformidles av Norsk samfunnsvitenskapelig Datatjeneste (NSD). Medborgerpanelet ønsker velkommen forskningsforslag til undersøkelsen. Mer informasjon om utlysninger og andre oppdateringer finnes på [www.medborger.uib.no](http://www.medborger.uib.no) <<http://www.medborger.uib.no>>.

|                     |         |
|---------------------|---------|
| <b>Analyseenhet</b> | Individ |
|---------------------|---------|

### Omfang

|             |       |
|-------------|-------|
| <b>Land</b> | Norge |
|-------------|-------|

#### Geografisk omfang

Nasjonal geografisk dekning. Fylke som geografisk enhet.

#### Univers

Norske borgerer over 18 år.

### Produsenter og sponsorer

|                                |                                                                                                                                                                                                                                                                      |
|--------------------------------|----------------------------------------------------------------------------------------------------------------------------------------------------------------------------------------------------------------------------------------------------------------------|
| <b>Primary Investigator(s)</b> | Elisabeth Ivarsflaten, Koordinator, Universitet i Bergen<br>Sveinung Arnesen, Bjarte Folkestad, Endre Tvinnereim, Åsta Dyrnes Nordø, Mikael Poul Johannesson, Erik Knudsen, Nina Serdarevic, Vitenskapelig team, Universitet i Bergen og UNI Research Rokkansenteret |
| <b>Andre produsenter</b>       | Asle Høgestøl, ideas2evidence, Koordinator<br>Øivind Skjervheim, ideas2evidence, Koordinator<br>Jostein Ryssevik, ideas2evidence, Kvalitetssikrer                                                                                                                    |

### Utvalg

#### Utvalgsprosedyre

Norsk medborgerpanel (NMP) har hatt to runder med rekruttering. I runde 1 ble det rekruttert 4 870 panelmedlemmer, og i runde 3 ble det rekruttert ytterligere 5 623 panelmedlemmer (se dokumentasjon fra runde 1 og 3). Forut syvende runde hadde Norsk Medborgerpanel 10 179 medlemmer.

Utvalgsprosedyren i runde 1 og 3 er identisk. 25 000 nordmenn over 18 år var tilfeldig trukket fra Det sentrale folkeregister. Listen bestod av følgende data: a) etternavn, b) fornavn, c) adresse, d) kjønn, e) alder, og f) telefonnummer. Utvalget ekskluderte personer som ikke hadde folkeregistrert adresse på uttrekkstidspunktet.

#### Vekting

For å kompensere for observert bias er det blitt kalkulert to vekter. Vektene er lik forholdet mellom et gitt strata i populasjonen og den totale populasjonen, dividert på forholdet mellom strata i nettoutvalget og det totale nettoutvalget. Denne prosedyren gir en verdi på rundt 1, men over 0. Respondenter som er underrepresentert får en vekt over 1, og respondenter som er overrepresentert får en vekt under 1. Vektene for de forskjellige strata er gitt i dokumentasjonsrapporten (tabell 8 i appendiks). Informasjonen om geografisk lokasjon, kjønn og alder, som vektene er basert på, er registerdata. Disse egenskapene var inkludert i bruttoutvalget mottatt fra folkeregisteret. Informasjon om utdanningsnivå er gitt av respondenten

når de svarer på spørreundersøkelsen. Rundt 9 prosent av nettutvalget svarte ikke på spørsmålet om utdanningsnivå. Av den grunn har to forskjellige vekter blitt kalkulert:

- Vekt 1 er basert på demografiske variabler (alder, kjønn og geografi).
- Vekt 2 er kombinerer de demografiske variablene med utdanningsnivå. Respondenter som mangler data på utdanningsvariabelen er bare vektet på demografi (utdanningskomponenten er satt til 1 i disse tilfellene).

Begge vekter vil gi en vektet N som er lik tallet på enheter i datasettet.

Vi vil sterkt anbefale å benytte vekt 2 i statistiske analyser, ettersom denne vekten er mer nøyaktig kompensert for varierende kilder av bias i nettutvalget.

| Datainnsamling             |                                                                                                                                                                                                                                                                                                                                                                                                                                                                                                                                                                                                                                                                                                                                                                                                                                                                                                                                                                                                                                                                                                                                                                                                                                                                                                 |
|----------------------------|-------------------------------------------------------------------------------------------------------------------------------------------------------------------------------------------------------------------------------------------------------------------------------------------------------------------------------------------------------------------------------------------------------------------------------------------------------------------------------------------------------------------------------------------------------------------------------------------------------------------------------------------------------------------------------------------------------------------------------------------------------------------------------------------------------------------------------------------------------------------------------------------------------------------------------------------------------------------------------------------------------------------------------------------------------------------------------------------------------------------------------------------------------------------------------------------------------------------------------------------------------------------------------------------------|
| <b>Type datainnsamling</b> | <p>Spørreundersøkelsen er web-basert. Eksisterende medlemmer blir invitert til hver enkelt runde via e-post.</p> <p>Rekruttering av nye medlemmer til panelet ble gjennomført i flere trinn.</p> <p>Først ble et invitasjonsbrev sendt ut til alle i utvalget. Invitasjonsbrevet inneholdt følgende informasjon: a) beskrivelse av prosjektet, b) gjeldende retningslinjer for personvern og prosedyrer for å ivareta anonymiteten til deltakerne, c) tidsrammen til prosjektet, d) deltakerne sin rett til å melde seg ut av panelet, e) kontaktinformasjon til de ansvarlige for prosjektet, f) en unik innloggingskode og webadresse til Norsk medborgerpanel sin internettside, g) estimert tid for å gjennomføre undersøkelsen (20 minutter).</p> <p>Personer i utvalget som innen en viss periode ikke hadde registrert seg ble sendt purring i form av et postkort.</p> <p>I rekrutteringsrunde nummer 2 ble personer i utvalget som ikke hadde registrert seg etter å ha mottatt både invitasjonsbrev og postkort purret via SMS (dersom de var registrert med telefonnummer i Folkeregisteret). Et tilfeldig trukket underutvalg ble i tillegg purret gjennom telefonisk kontakt. For mer informasjon henviser vi til dokumentasjonsrapporten for runde 3 av Norsk medborgerpanel.</p> |

|                   |  |
|-------------------|--|
| <b>Utgiver(e)</b> |  |
|-------------------|--|

# Filbeskrivelse

Datasettet inneholder 1 file(r)

| Norsk medborgerpanel - runde 7 |      |
|--------------------------------|------|
| # Enheter                      | 4689 |
| # Variable(r)                  | 613  |

# Variabelliste

Datasettet inneholder 613 variable(r)

| Fil Norsk medborgerpanel - runde 7 |                             |                                                                                                                                                           |         |              |         |         |                                                                           |
|------------------------------------|-----------------------------|-----------------------------------------------------------------------------------------------------------------------------------------------------------|---------|--------------|---------|---------|---------------------------------------------------------------------------|
| #                                  | Navn                        | Merkelapp                                                                                                                                                 | Type    | Format       | Gyldige | Ugyldig | Spørsmål                                                                  |
| 1                                  | <a href="#">responseid</a>  | responseid                                                                                                                                                | diskret | numeric-12.0 | -       | -       | -                                                                         |
| 2                                  | <a href="#">r7u</a>         | Undergruppe                                                                                                                                               | diskret | numeric-12.0 | 4689    | 0       | -                                                                         |
| 3                                  | <a href="#">r7recrui ..</a> | Tidspunkt for rekruttering                                                                                                                                | diskret | numeric-12.0 | 4689    | 0       | -                                                                         |
| 4                                  | <a href="#">r7browse ..</a> | Type nettleser brukt av respondent                                                                                                                        | diskret | character-16 | 4689    | 0       | -                                                                         |
| 5                                  | <a href="#">r7browse ..</a> | Nettleserversjon brukt av respondent                                                                                                                      | diskret | character-4  | 4689    | 0       | -                                                                         |
| 6                                  | <a href="#">r7mobile</a>    | Om respondenten bruker mobil til å svare på spørreskjema                                                                                                  | diskret | numeric-12.0 | 4689    | 0       | -                                                                         |
| 7                                  | <a href="#">r7device ..</a> | Skjermoppløsningen til enheten respondenten bruker til å svare på spørsmålet                                                                              | diskret | character-9  | 4689    | 0       | -                                                                         |
| 8                                  | <a href="#">r7device</a>    | Determinerer hvilken enhetstype respondenten bruker til å svare på spørsmålet                                                                             | diskret | numeric-12.0 | 4689    | 0       | -                                                                         |
| 9                                  | <a href="#">r7advanc ..</a> | Sjekker om respondenten sin nettleser støtter Advanced WI Features som krever klientside skript. Eksempler: slider, dra og slipp, bilder som svarknapper. | diskret | character-5  | 4689    | 0       | -                                                                         |
| 10                                 | <a href="#">r7ktilfr ..</a> | Tilfreds med: Livet nå om dagen                                                                                                                           | diskret | numeric-12.0 | 4689    | 0       | Livet nå om dagen?                                                        |
| 11                                 | <a href="#">r7ktilfr ..</a> | Tilfreds med: Din personlige økonomi                                                                                                                      | diskret | numeric-12.0 | 4689    | 0       | Din personlige økonomi?                                                   |
| 12                                 | <a href="#">r7ktilfr ..</a> | Tilfreds med: Regjeringen i Norge                                                                                                                         | diskret | numeric-12.0 | 4689    | 0       | Dagens regjering i Norge?                                                 |
| 13                                 | <a href="#">r7ktilfr ..</a> | Tilfreds med: Demokratiet i Norge                                                                                                                         | diskret | numeric-12.0 | 4689    | 0       | Måten demokratiet fungerer på i Norge?                                    |
| 14                                 | <a href="#">r7k10</a>       | Oppfatning økonomisk situasjon i Norge                                                                                                                    | diskret | numeric-12.0 | 4689    | 0       | Hvordan oppfatter du den økonomiske situasjonen i Norge i dag?            |
| 15                                 | <a href="#">r7k204</a>      | Ville stemt på følgende parti hvis stortingsvalg i morgen                                                                                                 | diskret | numeric-12.0 | 4689    | 0       | Hvilket parti ville du ha stemt på dersom det var stortingsvalg i morgen? |
| 16                                 | <a href="#">r7k204_1 ..</a> | Ville stemt på følgende parti hvis stortingsvalg i morgen, annet [anonymisert]                                                                            | diskret | character-50 | 4689    | 0       | Hvilket parti ville du ha stemt på dersom det var stortingsvalg i morgen? |
| 17                                 | <a href="#">r7k6_1</a>      | Liker/misliker: KrF                                                                                                                                       | diskret | numeric-12.0 | 4689    | 0       | Kristelig Folkeparti                                                      |
| 18                                 | <a href="#">r7k6_2</a>      | Liker/misliker: Høyre                                                                                                                                     | diskret | numeric-12.0 | 4689    | 0       | Høyre                                                                     |
| 19                                 | <a href="#">r7k6_3</a>      | Liker/misliker: FrP                                                                                                                                       | diskret | numeric-12.0 | 4689    | 0       | Fremskrittspartiet                                                        |
| 20                                 | <a href="#">r7k6_4</a>      | Liker/misliker: Venstre                                                                                                                                   | diskret | numeric-12.0 | 4689    | 0       | Venstre                                                                   |
| 21                                 | <a href="#">r7k6_5</a>      | Liker/misliker: Sosialistisk Venstreparti                                                                                                                 | diskret | numeric-12.0 | 4689    | 0       | Sosialistisk Venstreparti                                                 |
| 22                                 | <a href="#">r7k6_6</a>      | Liker/misliker: Senterpartiet                                                                                                                             | diskret | numeric-12.0 | 4689    | 0       | Senterpartiet                                                             |

**Fil Norsk medborgerpanel - runde 7**

| #  | Navn                       | Merkelapp                                                                                      | Type    | Format       | Gyldige | Ugyldig | Spørsmål                                                                                                                                      |
|----|----------------------------|------------------------------------------------------------------------------------------------|---------|--------------|---------|---------|-----------------------------------------------------------------------------------------------------------------------------------------------|
| 23 | <a href="#">r7k6_7</a>     | Liker/misliker: MDG                                                                            | diskret | numeric-12.0 | 4689    | 0       | Miljøpartiet De Grønne                                                                                                                        |
| 24 | <a href="#">r7k6_8</a>     | Liker/misliker: AP                                                                             | diskret | numeric-12.0 | 4689    | 0       | Arbeiderpartiet                                                                                                                               |
| 25 | <a href="#">r7k6_9</a>     | Liker/misliker: Rødt                                                                           | diskret | numeric-12.0 | 4689    | 0       | Rødt                                                                                                                                          |
| 26 | <a href="#">r7k9_1</a>     | [1] Viktigste politiske saker<br>[anonymisert]                                                 | diskret | character-54 | 4689    | 0       | Hva er de viktigste politiske sakene eller saksfeltene for deg personlig?                                                                     |
| 27 | <a href="#">r7k9_2</a>     | [2] Viktigste politiske saker<br>[anonymisert]                                                 | diskret | character-54 | 4689    | 0       | Hva er de viktigste politiske sakene eller saksfeltene for deg personlig?                                                                     |
| 28 | <a href="#">r7k9_3</a>     | [3] Viktigste politiske saker<br>[anonymisert]                                                 | diskret | character-55 | 4689    | 0       | Hva er de viktigste politiske sakene eller saksfeltene for deg personlig?                                                                     |
| 29 | <a href="#">r7ocreco..</a> | R7OCRECSM_mobil                                                                                | diskret | numeric-12.0 | 1199    | 3490    | -                                                                                                                                             |
| 30 | <a href="#">r7ran20</a>    | [Randomiserer hvis u=2. ]                                                                      | diskret | numeric-12.0 | 1199    | 3490    | -                                                                                                                                             |
| 31 | <a href="#">r7ocreco..</a> | Hvor viktig er god utdanning i avgjørelsen om noen får bosette seg?                            | diskret | numeric-12.0 | 4689    | 0       | Hvor viktig synes du å ha en god utdanning bør være for å avgjøre om noen som er født, oppvokst og bor utenfor Norge skal få bosette seg her? |
| 32 | <a href="#">r7ocreco..</a> | Hvor viktig er kristen bakgrunn i avgjørelsen om noen får bosette seg?                         | diskret | numeric-12.0 | 4689    | 0       | Hvor viktig synes du en kristen bakgrunn bør være for å avgjøre om noen skal få bosette seg her?                                              |
| 33 | <a href="#">r7ocreco..</a> | Hvor viktig er kunnskaper/ferdigheter som Norge trenger i avgjørelsen om noen får bosette seg? | diskret | numeric-12.0 | 4689    | 0       | Hvor viktig synes du kunnskaper og ferdigheter som Norge trenger bør være for å avgjøre om noen skal få bosette seg her?                      |
| 34 | <a href="#">r7ocreco..</a> | Hvor viktig er god utdanning i avgjørelsen om noen får bosette seg?                            | diskret | numeric-12.0 | 4689    | 0       | Hvor viktig synes du å ha en god utdanning bør være for å avgjøre om noen som er født, oppvokst og bor utenfor Norge skal få bosette seg her? |
| 35 | <a href="#">r7ocreco..</a> | Hvor viktig er god utdanning i avgjørelsen om noen får bosette seg?                            | diskret | numeric-12.0 | 4689    | 0       | Hvor viktig synes du å ha en god utdanning bør være for å avgjøre om noen som er født, oppvokst og bor utenfor Norge skal få bosette seg her? |
| 36 | <a href="#">r7ocreco..</a> | Hvor viktig er kristen bakgrunn i avgjørelsen om noen får bosette seg?                         | diskret | numeric-12.0 | 4689    | 0       | Hvor viktig synes du en kristen bakgrunn bør være for å avgjøre om noen skal få bosette seg her?                                              |
| 37 | <a href="#">r7ocreco..</a> | Hvor viktig er kristen bakgrunn i avgjørelsen om noen får bosette seg?                         | diskret | numeric-12.0 | 4689    | 0       | Hvor viktig synes du en kristen bakgrunn bør være for å avgjøre om noen skal få bosette seg her?                                              |
| 38 | <a href="#">r7ocreco..</a> | Hvor viktig er kunnskaper/ferdigheter som Norge trenger i avgjørelsen om noen får bosette seg? | diskret | numeric-12.0 | 4689    | 0       | Hvor viktig synes du kunnskaper og ferdigheter som Norge trenger bør være for å avgjøre om noen skal få bosette seg her?                      |
| 39 | <a href="#">r7ocreco..</a> | Hvor viktig er kunnskaper/ferdigheter som Norge trenger i avgjørelsen om noen får bosette seg? | diskret | numeric-12.0 | 4689    | 0       | Hvor viktig synes du kunnskaper og ferdigheter som Norge trenger bør være for å avgjøre om noen skal få bosette seg her?                      |
| 40 | <a href="#">r7ocreco..</a> | Hvor viktig er god utdanning i avgjørelsen om noen får bosette seg?                            | diskret | numeric-12.0 | 4689    | 0       | Hvor viktig synes du å ha en god utdanning bør være for å avgjøre om noen som er født, oppvokst og bor utenfor Norge skal få bosette seg her? |
| 41 | <a href="#">r7ocreco..</a> | Hvor viktig er god utdanning i avgjørelsen om noen får bosette seg?                            | diskret | numeric-12.0 | 4689    | 0       | Hvor viktig synes du å ha en god utdanning bør være for å avgjøre om noen som er født, oppvokst og bor utenfor Norge skal få bosette seg her? |



**Fil Norsk medborgerpanel - runde 7**

| #  | Navn                         | Merkelapp                                                                                      | Type    | Format       | Gyldige | Ugyldig | Spørsmål                                                                                                                                                                      |
|----|------------------------------|------------------------------------------------------------------------------------------------|---------|--------------|---------|---------|-------------------------------------------------------------------------------------------------------------------------------------------------------------------------------|
| 42 | <a href="#">r7ocreces ..</a> | Hvor viktig er kristen bakgrunn i avgjørelsen om noen får bosette seg?                         | diskret | numeric-12.0 | 4689    | 0       | Hvor viktig synes du en kristen bakgrunn bør være for å avgjøre om noen skal få bosette seg her?                                                                              |
| 43 | <a href="#">r7ocreces ..</a> | Hvor viktig er kristen bakgrunn i avgjørelsen om noen får bosette seg?                         | diskret | numeric-12.0 | 4689    | 0       | Hvor viktig synes du en kristen bakgrunn bør være for å avgjøre om noen skal få bosette seg her?                                                                              |
| 44 | <a href="#">r7ocreces ..</a> | Hvor viktig er kunnskaper/ferdigheter som Norge trenger i avgjørelsen om noen får bosette seg? | diskret | numeric-12.0 | 4689    | 0       | Hvor viktig synes du kunnskaper og ferdigheter som Norge trenger bør være for å avgjøre om noen skal få bosette seg her?                                                      |
| 45 | <a href="#">r7ocreces ..</a> | Hvor viktig er kunnskaper/ferdigheter som Norge trenger i avgjørelsen om noen får bosette seg? | diskret | numeric-12.0 | 4689    | 0       | Hvor viktig synes du kunnskaper og ferdigheter som Norge trenger bør være for å avgjøre om noen skal få bosette seg her?                                                      |
| 46 | <a href="#">r7ocreces ..</a> | I hvilken grad bør Høyesteretts makt i kontroversielle saker reduseres?                        | diskret | numeric-12.0 | 4689    | 0       | Generelt sett, i hvilken grad mener du at Norges Høyesteretts makt til å avgjøre visse typer kontroversielle saker bør reduseres?                                             |
| 47 | <a href="#">r7ocreces ..</a> | I hvilken grad favoriserer Høyesterett enkelte grupper?                                        | diskret | numeric-12.0 | 4689    | 0       | I hvilken grad mener du at avgjørelsene til Norges Høyesterett favoriserer enkelte grupper mer enn andre?                                                                     |
| 48 | <a href="#">r7ocreces ..</a> | I hvilken grad kan domstolen avskaffes, dersom Høyesterett tar mange valg folk er uenige i?    | diskret | numeric-12.0 | 4689    | 0       | Og i hvilken grad mener du at dersom Norges Høyesterett begynner å ta mange avgjørelser som folk flest er uenige i, kan det være like greit å avskaffe domstolen fullstendig? |
| 49 | <a href="#">r7ocreces ..</a> | I hvilken grad bør Høyesteretts makt i kontroversielle saker reduseres?                        | diskret | numeric-12.0 | 4689    | 0       | Generelt sett, i hvilken grad mener du at Norges Høyesteretts makt til å avgjøre visse typer kontroversielle saker bør reduseres?                                             |
| 50 | <a href="#">r7ocreces ..</a> | I hvilken grad bør Høyesteretts makt i kontroversielle saker reduseres?                        | diskret | numeric-12.0 | 4689    | 0       | Generelt sett, i hvilken grad mener du at Norges Høyesteretts makt til å avgjøre visse typer kontroversielle saker bør reduseres?                                             |
| 51 | <a href="#">r7ocreces ..</a> | I hvilken grad favoriserer Høyesterett enkelte grupper?                                        | diskret | numeric-12.0 | 4689    | 0       | I hvilken grad mener du at avgjørelsene til Norges Høyesterett favoriserer enkelte grupper mer enn andre?                                                                     |
| 52 | <a href="#">r7ocreces ..</a> | I hvilken grad favoriserer Høyesterett enkelte grupper?                                        | diskret | numeric-12.0 | 4689    | 0       | I hvilken grad mener du at avgjørelsene til Norges Høyesterett favoriserer enkelte grupper mer enn andre?                                                                     |
| 53 | <a href="#">r7ocreces ..</a> | I hvilken grad kan domstolen avskaffes, dersom Høyesterett tar mange valg folk er uenige i?    | diskret | numeric-12.0 | 4689    | 0       | Og i hvilken grad mener du at dersom Norges Høyesterett begynner å ta mange avgjørelser som folk flest er uenige i, kan det være like greit å avskaffe domstolen fullstendig? |
| 54 | <a href="#">r7ocreces ..</a> | I hvilken grad kan domstolen avskaffes, dersom Høyesterett tar mange valg folk er uenige i?    | diskret | numeric-12.0 | 4689    | 0       | Og i hvilken grad mener du at dersom Norges Høyesterett begynner å ta mange avgjørelser som folk flest er uenige i, kan det være like greit å avskaffe domstolen fullstendig? |
| 55 | <a href="#">r7ocreces ..</a> | I hvilken grad bør Høyesteretts makt i kontroversielle saker reduseres?                        | diskret | numeric-12.0 | 4689    | 0       | Generelt sett, i hvilken grad mener du at Norges Høyesteretts makt til å avgjøre visse typer kontroversielle saker bør reduseres?                                             |
| 56 | <a href="#">r7ocreces ..</a> | I hvilken grad bør Høyesteretts makt i                                                         | diskret | numeric-12.0 | 4689    | 0       | Generelt sett, i hvilken grad mener du at Norges Høyesteretts makt til å avgjøre                                                                                              |

**Fil Norsk medborgerpanel - runde 7**

| #  | Navn                        | Merkelapp                                                                                      | Type    | Format       | Gyldige | Ugyldig | Spørsmål                                                                                                                                                                      |
|----|-----------------------------|------------------------------------------------------------------------------------------------|---------|--------------|---------|---------|-------------------------------------------------------------------------------------------------------------------------------------------------------------------------------|
|    |                             | kontroversielle saker reduseres?                                                               |         |              |         |         | visse typer kontroversielle saker bør reduseres?                                                                                                                              |
| 57 | <a href="#">r7ocrecs_..</a> | I hvilken grad favoriserer Høyesterett enkelte grupper?                                        | diskret | numeric-12.0 | 4689    | 0       | I hvilken grad mener du at avgjørelsene til Norges Høyesterett favoriserer enkelte grupper mer enn andre?                                                                     |
| 58 | <a href="#">r7ocrecs_..</a> | I hvilken grad favoriserer Høyesterett enkelte grupper?                                        | diskret | numeric-12.0 | 4689    | 0       | I hvilken grad mener du at avgjørelsene til Norges Høyesterett favoriserer enkelte grupper mer enn andre?                                                                     |
| 59 | <a href="#">r7ocrecs_..</a> | I hvilken grad kan domstolen avskaffes, dersom Høyesterett tar mange valg folk er uenige i?    | diskret | numeric-12.0 | 4689    | 0       | Og i hvilken grad mener du at dersom Norges Høyesterett begynner å ta mange avgjørelser som folk flest er uenige i, kan det være like greit å avskaffe domstolen fullstendig? |
| 60 | <a href="#">r7ocrecs_..</a> | I hvilken grad kan domstolen avskaffes, dersom Høyesterett tar mange valg folk er uenige i?    | diskret | numeric-12.0 | 4689    | 0       | Og i hvilken grad mener du at dersom Norges Høyesterett begynner å ta mange avgjørelser som folk flest er uenige i, kan det være like greit å avskaffe domstolen fullstendig? |
| 61 | <a href="#">r7mi1</a>       | Personlige tanker når du hører/leser ordet «muslim»? [anonymisert]                             | diskret | character-53 | 4689    | 0       | Hva tenker du personlig på når du hører ordet «muslim»?                                                                                                                       |
| 62 | <a href="#">r7ran1</a>      | [Randomiserer hvis u!=2. ]                                                                     | diskret | numeric-12.0 | 3490    | 1199    | -                                                                                                                                                                             |
| 63 | <a href="#">r7kmla</a>      | Tanker når du hører/leser ordene «olje og gass»? [anonymisert]                                 | diskret | character-56 | 4689    | 0       | Hva tenker du når du hører eller leser ordene «olje og gass»?                                                                                                                 |
| 64 | <a href="#">r7kmlb</a>      | Tanker når du hører/leser ordet «energi»? [anonymisert]                                        | diskret | character-54 | 4689    | 0       | Hva tenker du når du hører eller leser ordet «energi»?                                                                                                                        |
| 65 | <a href="#">r7kmlc</a>      | Tanker når du hører/leser ordet «omstilling»? [anonymisert]                                    | diskret | character-54 | 4689    | 0       | Hva tenker du når du hører eller leser ordet «omstilling»?                                                                                                                    |
| 66 | <a href="#">r7dv30_1</a>    | Påstand: Skattetrykket bør senkes                                                              | diskret | numeric-12.0 | 4689    | 0       | Skattetrykket bør senkes, selv om det fører til nedskjæringer i velferdsstaten.                                                                                               |
| 67 | <a href="#">r7dv30_2</a>    | Påstand: Kommersielle privatskoler bør være tillatt.                                           | diskret | numeric-12.0 | 4689    | 0       | Kommersielle privatskoler bør være tillatt.                                                                                                                                   |
| 68 | <a href="#">r7dv30_3</a>    | Påstand: Heterofile og homofile par bør ha like rettigheter                                    | diskret | numeric-12.0 | 4689    | 0       | Heterofile og homofile par bør ha like rettigheter.                                                                                                                           |
| 69 | <a href="#">r7dv30_4</a>    | Påstand: Bedre for et land hvis det er mangfold av ulike religioner/livssyn                    | diskret | numeric-12.0 | 4689    | 0       | Det er bedre for et land hvis det finnes et mangfold av ulike religioner og livssyn.                                                                                          |
| 70 | <a href="#">r7ran40</a>     | [Alle respondenter randomisert. ]                                                              | diskret | numeric-12.0 | 1199    | 3490    | -                                                                                                                                                                             |
| 71 | <a href="#">r7dvh_1</a>     | Påstand: Bør ikke tillate olje- og gassutvinning ved Lofoten og Vesterålen                     | diskret | numeric-12.0 | 4689    | 0       | Vi bør ikke tillate olje- og gassutvinning i området ved Lofoten og Vesterålen.                                                                                               |
| 72 | <a href="#">r7dvh_2</a>     | Påstand: Flyktninger bør ha samme rett til sosialhjelp som nordmenn                            | diskret | numeric-12.0 | 4689    | 0       | Flyktninger bør ha samme rett til sosialhjelp som nordmenn, selv om de ikke er norske statsborgere.                                                                           |
| 73 | <a href="#">r7dvh_3</a>     | Påstand: Mange offentlige aktiviteter kunne blitt utført bedre og billigere av private aktører | diskret | numeric-12.0 | 4689    | 0       | Mange offentlige aktiviteter kunne blitt utført både bedre og billigere, dersom de ble overlatt til private aktører.                                                          |

| Fil Norsk medborgerpanel - runde 7 |                             |                                                                                                                 |         |              |         |         |                                                                                                                                                                                         |
|------------------------------------|-----------------------------|-----------------------------------------------------------------------------------------------------------------|---------|--------------|---------|---------|-----------------------------------------------------------------------------------------------------------------------------------------------------------------------------------------|
| #                                  | Navn                        | Merkelapp                                                                                                       | Type    | Format       | Gyldige | Ugyldig | Spørsmål                                                                                                                                                                                |
| 74                                 | <a href="#">r7dvh_4</a>     | Påstand: Staten bør bidra til å redusere inntektsforskjeller                                                    | diskret | numeric-12.0 | 4689    | 0       | Staten bør bidra til å redusere inntektsforskjeller i samfunnet.                                                                                                                        |
| 75                                 | <a href="#">r7ran2</a>      | [Alle respondenter randomisert. ]                                                                               | diskret | numeric-12.0 | 4681    | 8       | -                                                                                                                                                                                       |
| 76                                 | <a href="#">r7km13_1</a>    | Bør satses mest på utslippsreduksjon enten i Norge, utland eller begge steder                                   | diskret | numeric-12.0 | 4689    | 0       | Bør myndighetene satse mest på å redusere utslipp i Norge, eller i utlandet, eller like mye begge steder?                                                                               |
| 77                                 | <a href="#">r7km13_2</a>    | Utsagn: Mesteparten av utslippsreduksjonen Norge forplikter seg til, bør tas i utlandet                         | diskret | numeric-12.0 | 4689    | 0       | «Mesteparten av utslippsreduksjonene av klimagasser som Norge har forpliktet seg til, bør tas i utlandet»                                                                               |
| 78                                 | <a href="#">r7elite_1</a>   | Påstand: Vi er enige om hva som må gjøres, men lite skjer fordi myndighetene er i veien                         | diskret | numeric-12.0 | 4689    | 0       | Vi er enige om de fleste ting som må gjøres i dette landet, men lite skjer fordi myndighetene står i veien.                                                                             |
| 79                                 | <a href="#">r7elite_2</a>   | Påstand: Yrkespolitikere har god kontakt med velgere i hele landet                                              | diskret | numeric-12.0 | 4689    | 0       | De fleste yrkespolitikere i Norge har god kontakt med velgere i hele landet.                                                                                                            |
| 80                                 | <a href="#">r7elite_3</a>   | Påstand: Mange viktige avgjørelser tatt av liten gruppe uten vanlige folks viten                                | diskret | numeric-12.0 | 4689    | 0       | Mange viktige avgjørelser i dette landet blir tatt av en liten gruppe mennesker uten at vanlige folk får vite om det.                                                                   |
| 81                                 | <a href="#">r7elite_4</a>   | Påstand: Like stor forskjell mellom politikere som mellom folk ellers                                           | diskret | numeric-12.0 | 4689    | 0       | Det er like stor forskjell mellom politikere som det er mellom folk ellers.                                                                                                             |
| 82                                 | <a href="#">r7ran5</a>      | [Randomiserer hvis u=2. ]                                                                                       | diskret | numeric-12.0 | 1195    | 3494    | -                                                                                                                                                                                       |
| 83                                 | <a href="#">r7mi4_1</a>     | Bryr ledere seg mest om seg selv, eller prøver de å gjøre det de mener er rett?                                 | diskret | numeric-12.0 | 4689    | 0       | Hva mener du?                                                                                                                                                                           |
| 84                                 | <a href="#">r7mi4_2</a>     | Bryr muslimske ledere seg mest om seg selv, eller prøver de å gjøre det de mener er rett?                       | diskret | numeric-12.0 | 4689    | 0       | Hva mener du?                                                                                                                                                                           |
| 85                                 | <a href="#">r7pad10_1</a>   | Påstand: Innvandrerbarn med foreldre som har ulovlig opphold, bør få bli dersom foreldre sendt ut               | diskret | numeric-12.0 | 4689    | 0       | Innvandrerbarn som har foreldre som oppholder seg ulovlig i Norge bør ha krav på å få bli i landet dersom foreldrene blir sendt ut.                                                     |
| 86                                 | <a href="#">r7pad10_2</a>   | Påstand: Hvis arbeidsgiver gir deg en arbeidstelefon, bør arbeidsgiver ha lov til å lese meldinger på telefonen | diskret | numeric-12.0 | 4689    | 0       | Dersom en arbeidsgiver gir deg en mobiltelefon som skal brukes til arbeid, bør arbeidsgiveren ha lov til å lese alle tekstmeldinger og e-poster du sender og mottar på denne telefonen. |
| 87                                 | <a href="#">r7pad10_3</a>   | Påstand: Ikke lov å bringe nabokonflikter til domstol før mekling                                               | diskret | numeric-12.0 | 4689    | 0       | Det bør ikke være lov å bringe nabokonflikter (for eksempel om høyde på trær og gjerder) inn for domstolene uten at man først har forsøkt å løse konflikten gjennom mekling.            |
| 88                                 | <a href="#">r7k15_1</a>     | Er mennesker til å stole på?                                                                                    | diskret | numeric-12.0 | 4689    | 0       | Vil du si at de fleste mennesker i sin alminnelighet er til å stole på, eller mener du at man ikke kan være forsiktig nok når man har med andre å gjøre?                                |
| 89                                 | <a href="#">r7pad14_...</a> | Velger en tilfeldig versjon av konjunksjonseksperimentet. Bakgrunnsvariabel til R7PAD14.                        | diskret | numeric-12.0 | 4659    | 30      | -                                                                                                                                                                                       |

**Fil Norsk medborgerpanel - runde 7**

| #   | Navn                       | Merkelapp                                                                                                                       | Type    | Format       | Gyldige | Ugyldig | Spørsmål |
|-----|----------------------------|---------------------------------------------------------------------------------------------------------------------------------|---------|--------------|---------|---------|----------|
| 90  | <a href="#">r7pad14_..</a> | Antall artikler respondentene kan velge. Bakgrunnsvariabel til R7PAD14.                                                         | diskret | numeric-12.0 | 4659    | 30      | -        |
| 91  | <a href="#">r7pad14_..</a> | Tilfeldig valgt kilde nr. 1. Bakgrunnsvariabel til konjunksjonseksperiment R7PAD14.                                             | diskret | character-18 | 4689    | 0       | -        |
| 92  | <a href="#">r7pad14_..</a> | Tilfeldig valgt kilde nr. 2. Bakgrunnsvariabel til konjunksjonseksperiment R7PAD14.                                             | diskret | character-18 | 4689    | 0       | -        |
| 93  | <a href="#">r7pad14_..</a> | Tilfeldig valgt kilde nr. 3. Bakgrunnsvariabel til konjunksjonseksperiment R7PAD14.                                             | diskret | character-18 | 4689    | 0       | -        |
| 94  | <a href="#">r7pad14_..</a> | Tilfeldig valgt kilde nr. 4. Bakgrunnsvariabel til konjunksjonseksperiment R7PAD14.                                             | diskret | character-18 | 4689    | 0       | -        |
| 95  | <a href="#">r7pad14_..</a> | Tilfeldig valgt kilde nr. 5. Bakgrunnsvariabel til konjunksjonseksperiment R7PAD14.                                             | diskret | character-18 | 4689    | 0       | -        |
| 96  | <a href="#">r7pad14_..</a> | Tilfeldig valgt kilde nr. 6. Bakgrunnsvariabel til konjunksjonseksperiment R7PAD14.                                             | diskret | character-18 | 4689    | 0       | -        |
| 97  | <a href="#">r7pad14_..</a> | Dikotom: tilfeldig valg om artiklene skal listes med anbefaling, eller ikke. Bakgrunnsvariabel konjunksjonseksperiment R7PAD14. | diskret | numeric-12.0 | 4659    | 30      | -        |
| 98  | <a href="#">r7pad14_..</a> | Tilfeldig valgt anbefaling nr. 1. Bakgrunnsvariabel til konjunksjonseksperiment R7PAD14.                                        | diskret | character-23 | 4689    | 0       | -        |
| 99  | <a href="#">r7pad14_..</a> | Tilfeldig valgt anbefaling nr. 2. Bakgrunnsvariabel til konjunksjonseksperiment R7PAD14.                                        | diskret | character-23 | 4689    | 0       | -        |
| 100 | <a href="#">r7pad14_..</a> | Tilfeldig valgt anbefaling nr. 3. Bakgrunnsvariabel til konjunksjonseksperiment R7PAD14.                                        | diskret | character-23 | 4689    | 0       | -        |
| 101 | <a href="#">r7pad14_..</a> | Tilfeldig valgt anbefaling nr. 4. Bakgrunnsvariabel til konjunksjonseksperiment R7PAD14.                                        | diskret | character-23 | 4689    | 0       | -        |
| 102 | <a href="#">r7pad14_..</a> | Tilfeldig valgt anbefaling nr. 5. Bakgrunnsvariabel til konjunksjonseksperiment R7PAD14.                                        | diskret | character-23 | 4689    | 0       | -        |
| 103 | <a href="#">r7pad14_..</a> | Tilfeldig valgt anbefaling nr. 6. Bakgrunnsvariabel til konjunksjonseksperiment R7PAD14.                                        | diskret | character-23 | 4689    | 0       | -        |

**Fil Norsk medborgerpanel - runde 7**

| #   | Navn                        | Merkelapp                                                                                                                    | Type    | Format       | Gyldige | Ugyldig | Spørsmål |
|-----|-----------------------------|------------------------------------------------------------------------------------------------------------------------------|---------|--------------|---------|---------|----------|
| 104 | <a href="#">r7pad14 ..</a>  | Tilfeldig valgt artikkeloverskrift nr. 1. Bakgrunnsvariabel til konjunksjonseksperiment R7PAD14.                             | diskret | character-55 | 4689    | 0       | -        |
| 105 | <a href="#">r7pad14 ..</a>  | Tilfeldig valgt artikkeloverskrift nr. 2. Bakgrunnsvariabel til konjunksjonseksperiment R7PAD14.                             | diskret | character-55 | 4689    | 0       | -        |
| 106 | <a href="#">r7pad14 ..</a>  | Tilfeldig valgt artikkeloverskrift nr. 3. Bakgrunnsvariabel til konjunksjonseksperiment R7PAD14.                             | diskret | character-55 | 4689    | 0       | -        |
| 107 | <a href="#">r7pad14 ..</a>  | Tilfeldig valgt artikkeloverskrift nr. 4. Bakgrunnsvariabel til konjunksjonseksperiment R7PAD14.                             | diskret | character-55 | 4689    | 0       | -        |
| 108 | <a href="#">r7pad14 ..</a>  | Tilfeldig valgt artikkeloverskrift nr. 5. Bakgrunnsvariabel til konjunksjonseksperiment R7PAD14.                             | diskret | character-55 | 4689    | 0       | -        |
| 109 | <a href="#">r7pad14 ..</a>  | Tilfeldig valgt artikkeloverskrift nr. 6. Bakgrunnsvariabel til konjunksjonseksperiment R7PAD14.                             | diskret | character-55 | 4689    | 0       | -        |
| 110 | <a href="#">r7selexp ..</a> | Antall artikler respondentene kan velge. Bakgrunnsvariabel til konjunksjonseksperiment r7selexp2.                            | diskret | numeric-12.0 | 4659    | 30      | -        |
| 111 | <a href="#">r7selexp ..</a> | Dikotom: tilfeldig valg om artiklene skal listes med kilder, eller ikke. Bakgrunnsvariabel konjunksjonseksperiment r7selexp2 | diskret | numeric-12.0 | 4659    | 30      | -        |
| 112 | <a href="#">r7selexp ..</a> | Tilfeldig valgt kilde nr. 1. Bakgrunnsvariabel til konjunksjonseksperiment 7selexp2.                                         | diskret | character-18 | 4689    | 0       | -        |
| 113 | <a href="#">r7selexp ..</a> | Tilfeldig valgt kilde nr. 2. Bakgrunnsvariabel til konjunksjonseksperiment 7selexp2.                                         | diskret | character-18 | 4689    | 0       | -        |
| 114 | <a href="#">r7selexp ..</a> | Tilfeldig valgt kilde nr. 3. Bakgrunnsvariabel til konjunksjonseksperiment 7selexp2.                                         | diskret | character-18 | 4689    | 0       | -        |
| 115 | <a href="#">r7selexp ..</a> | Tilfeldig valgt kilde nr. 4. Bakgrunnsvariabel til konjunksjonseksperiment 7selexp2.                                         | diskret | character-18 | 4689    | 0       | -        |
| 116 | <a href="#">r7selexp ..</a> | Velger tilfeldig om artiklene skal inneholde parti og                                                                        | diskret | numeric-12.0 | 4659    | 30      | -        |

| Fil Norsk medborgerpanel - runde 7 |                             |                                                                                                                                |         |              |         |         |                                                                                                                                                                                                         |
|------------------------------------|-----------------------------|--------------------------------------------------------------------------------------------------------------------------------|---------|--------------|---------|---------|---------------------------------------------------------------------------------------------------------------------------------------------------------------------------------------------------------|
| #                                  | Navn                        | Merkelapp                                                                                                                      | Type    | Format       | Gyldige | Ugyldig | Spørsmål                                                                                                                                                                                                |
|                                    |                             | palens, eller hvilken som helst kombinasjon av disse. Bakgrunnsvariabel til konjunksjonseksperiment R7selexp2                  |         |              |         |         |                                                                                                                                                                                                         |
| 117                                | <a href="#">r7selexp ..</a> | Tilfeldig valgt artikkeloverskrift nr. 1. Bakgrunnsvariabel til konjunksjonseksperiment r7selexp2.                             | diskret | character-55 | 4689    | 0       | -                                                                                                                                                                                                       |
| 118                                | <a href="#">r7selexp ..</a> | Tilfeldig valgt artikkeloverskrift nr. 2. Bakgrunnsvariabel til konjunksjonseksperiment r7selexp2.                             | diskret | character-55 | 4689    | 0       | -                                                                                                                                                                                                       |
| 119                                | <a href="#">r7selexp ..</a> | Tilfeldig valgt artikkeloverskrift nr. 3. Bakgrunnsvariabel til konjunksjonseksperiment r7selexp2.                             | diskret | character-55 | 4689    | 0       | -                                                                                                                                                                                                       |
| 120                                | <a href="#">r7selexp ..</a> | Tilfeldig valgt artikkeloverskrift nr. 4. Bakgrunnsvariabel til konjunksjonseksperiment r7selexp2.                             | diskret | character-55 | 4689    | 0       | -                                                                                                                                                                                                       |
| 121                                | <a href="#">r7pad14 ..</a>  | Artikkel 1. En liste over tilfeldig valgte artikler hvor respondentene skal velge hvilke de vil lese. Konjunksjonseksperiment. | diskret | numeric-12.0 | 4689    | 0       | Hvis du var nødt til å lese [1 sak /2 saker /3 saker], [hvilken sak /hvilke saker] ville foretrukket å bruke tiden din på? [Her følger en liste over tilfeldig valgte artikler. Se bakgrunnsvariabler.] |
| 122                                | <a href="#">r7pad14 ..</a>  | Artikkel 2. En liste over tilfeldig valgte artikler hvor respondentene skal velge hvilke de vil lese. Konjunksjonseksperiment. | diskret | numeric-12.0 | 4689    | 0       | Hvis du var nødt til å lese [1 sak /2 saker /3 saker], [hvilken sak /hvilke saker] ville foretrukket å bruke tiden din på? [Her følger en liste over tilfeldig valgte artikler. Se bakgrunnsvariabler.] |
| 123                                | <a href="#">r7pad14 ..</a>  | Artikkel 3. En liste over tilfeldig valgte artikler hvor respondentene skal velge hvilke de vil lese. Konjunksjonseksperiment. | diskret | numeric-12.0 | 4689    | 0       | Hvis du var nødt til å lese [1 sak /2 saker /3 saker], [hvilken sak /hvilke saker] ville foretrukket å bruke tiden din på? [Her følger en liste over tilfeldig valgte artikler. Se bakgrunnsvariabler.] |
| 124                                | <a href="#">r7pad14 ..</a>  | Artikkel 4. En liste over tilfeldig valgte artikler hvor respondentene skal velge hvilke de vil lese. Konjunksjonseksperiment. | diskret | numeric-12.0 | 4689    | 0       | Hvis du var nødt til å lese [1 sak /2 saker /3 saker], [hvilken sak /hvilke saker] ville foretrukket å bruke tiden din på? [Her følger en liste over tilfeldig valgte artikler. Se bakgrunnsvariabler.] |
| 125                                | <a href="#">r7pad14 ..</a>  | Artikkel 1. En liste over tilfeldig valgte artikler hvor respondentene skal velge hvilke de vil lese. Konjunksjonseksperiment. | diskret | numeric-12.0 | 4689    | 0       | Hvis du var nødt til å lese [1 sak /2 saker /3 saker], [hvilken sak /hvilke saker] ville foretrukket å bruke tiden din på? [Her følger en liste over tilfeldig valgte artikler. Se bakgrunnsvariabler.] |
| 126                                | <a href="#">r7pad14 ..</a>  | Artikkel 2. En liste over tilfeldig valgte artikler hvor respondentene skal velge hvilke de vil lese. Konjunksjonseksperiment. | diskret | numeric-12.0 | 4689    | 0       | Hvis du var nødt til å lese [1 sak /2 saker /3 saker], [hvilken sak /hvilke saker] ville foretrukket å bruke tiden din på? [Her følger en liste over tilfeldig valgte artikler. Se bakgrunnsvariabler.] |
| 127                                | <a href="#">r7pad14 ..</a>  | Artikkel 3. En liste over tilfeldig valgte artikler hvor respondentene skal                                                    | diskret | numeric-12.0 | 4689    | 0       | Hvis du var nødt til å lese [1 sak /2 saker /3 saker], [hvilken sak /hvilke saker] ville foretrukket å bruke tiden din                                                                                  |

**Fil Norsk medborgerpanel - runde 7**

| #   | Navn                        | Merkelapp                                                                                                                         | Type    | Format       | Gyldige | Ugyldig | Spørsmål                                                                                                                                                                                                   |
|-----|-----------------------------|-----------------------------------------------------------------------------------------------------------------------------------|---------|--------------|---------|---------|------------------------------------------------------------------------------------------------------------------------------------------------------------------------------------------------------------|
|     |                             | velge hvilke de vil lese.<br>Konjunksjonseksperiment.                                                                             |         |              |         |         | på? [Her følger en liste over tilfeldig valgte artikler. Se bakgrunnsvariabler.]                                                                                                                           |
| 128 | <a href="#">r7pad14_..</a>  | Artikkel 4. En liste over tilfeldig valgte artikler hvor respondentene skal velge hvilke de vil lese.<br>Konjunksjonseksperiment. | diskret | numeric-12.0 | 4689    | 0       | Hvis du var nødt til å lese [1 sak /2 saker /3 saker], [hvilken sak /hvilke saker] ville foretrukket å bruke tiden din på? [Her følger en liste over tilfeldig valgte artikler. Se bakgrunnsvariabler.]    |
| 129 | <a href="#">r7pad14_..</a>  | Artikkel 5. En liste over tilfeldig valgte artikler hvor respondentene skal velge hvilke de vil lese.<br>Konjunksjonseksperiment. | diskret | numeric-12.0 | 4689    | 0       | Hvis du var nødt til å lese [1 sak /2 saker /3 saker], [hvilken sak /hvilke saker] ville foretrukket å bruke tiden din på? [Her følger en liste over tilfeldig valgte artikler. Se bakgrunnsvariabler.]    |
| 130 | <a href="#">r7pad14_..</a>  | Artikkel 6. En liste over tilfeldig valgte artikler hvor respondentene skal velge hvilke de vil lese.<br>Konjunksjonseksperiment. | diskret | numeric-12.0 | 4689    | 0       | Hvis du var nødt til å lese [1 sak /2 saker /3 saker], [hvilken sak /hvilke saker] ville foretrukket å bruke tiden din på? [Her følger en liste over tilfeldig valgte artikler. Se bakgrunnsvariabler.]    |
| 131 | <a href="#">r7selexp_..</a> | Artikkel 1. En liste over tilfeldig valgte artikler hvor respondentene skal velge hvilke de vil lese.<br>Konjunksjonseksperiment. | diskret | numeric-12.0 | 4689    | 0       | Hvis du var nødt til å lese [1 sak /2 saker /3 saker], [hvilken sak /hvilke saker] ville du foretrukket å bruke tiden din på? [Her følger en liste over tilfeldig valgte artikler. Se bakgrunnsvariabler.] |
| 132 | <a href="#">r7selexp_..</a> | Artikkel 2. En liste over tilfeldig valgte artikler hvor respondentene skal velge hvilke de vil lese.<br>Konjunksjonseksperiment. | diskret | numeric-12.0 | 4689    | 0       | Hvis du var nødt til å lese [1 sak /2 saker /3 saker], [hvilken sak /hvilke saker] ville du foretrukket å bruke tiden din på? [Her følger en liste over tilfeldig valgte artikler. Se bakgrunnsvariabler.] |
| 133 | <a href="#">r7selexp_..</a> | Artikkel 3. En liste over tilfeldig valgte artikler hvor respondentene skal velge hvilke de vil lese.<br>Konjunksjonseksperiment. | diskret | numeric-12.0 | 4689    | 0       | Hvis du var nødt til å lese [1 sak /2 saker /3 saker], [hvilken sak /hvilke saker] ville du foretrukket å bruke tiden din på? [Her følger en liste over tilfeldig valgte artikler. Se bakgrunnsvariabler.] |
| 134 | <a href="#">r7selexp_..</a> | Artikkel 4. En liste over tilfeldig valgte artikler hvor respondentene skal velge hvilke de vil lese.<br>Konjunksjonseksperiment. | diskret | numeric-12.0 | 4689    | 0       | Hvis du var nødt til å lese [1 sak /2 saker /3 saker], [hvilken sak /hvilke saker] ville du foretrukket å bruke tiden din på? [Her følger en liste over tilfeldig valgte artikler. Se bakgrunnsvariabler.] |
| 135 | <a href="#">r7Error_..</a>  | 36 respondenter opplevde feil i konjunksjonseksperimentene r7pad14 og r7selexp2. Disse ble hindret fra å gå videre i skjema.      | diskret | numeric-12.0 | 4689    | 0       | -                                                                                                                                                                                                          |
| 136 | <a href="#">r7selexp_..</a> | Viser i hvilken rekkefølge r7pad14 og r7selexp2 blir spurt. Rekkefølgen er tilfeldig.                                             | diskret | character-17 | 4689    | 0       | -                                                                                                                                                                                                          |
| 137 | <a href="#">r7pad6_p_..</a> | Karakteristikk til profil 1: alder. Bakgrunnsvariabel til r7pad6.                                                                 | diskret | character-6  | 4689    | 0       | -                                                                                                                                                                                                          |
| 138 | <a href="#">r7pad6_p_..</a> | Karakteristikk til profil 1: kjønn. Bakgrunnsvariabel til r7pad6.                                                                 | diskret | character-6  | 4689    | 0       | -                                                                                                                                                                                                          |
| 139 | <a href="#">r7pad6_p_..</a> | Karakteristikk til profil 1: bosted. Bakgrunnsvariabel til r7pad6.                                                                | diskret | character-10 | 4689    | 0       | -                                                                                                                                                                                                          |

**Fil Norsk medborgerpanel - runde 7**

| #   | Navn                       | Merkelapp                                                                   | Type    | Format       | Gyldige | Ugyldig | Spørsmål |
|-----|----------------------------|-----------------------------------------------------------------------------|---------|--------------|---------|---------|----------|
| 140 | <a href="#">r7pad6_p..</a> | Karakteristikk til profil 1: sivilstatus. Bakgrunnsvariabel til r7pad6.     | diskret | character-9  | 4689    | 0       | -        |
| 141 | <a href="#">r7pad6_p..</a> | Karakteristikk til profil 1: utdanning. Bakgrunnsvariabel til r7pad6.       | diskret | character-13 | 4689    | 0       | -        |
| 142 | <a href="#">r7pad6_p..</a> | Karakteristikk til profil 1: religion. Bakgrunnsvariabel til r7pad6.        | diskret | character-10 | 4689    | 0       | -        |
| 143 | <a href="#">r7pad6_p..</a> | Karakteristikk til profil 1: arbeidserfaring. Bakgrunnsvariabel til r7pad6. | diskret | character-28 | 4689    | 0       | -        |
| 144 | <a href="#">r7pad6_p..</a> | Karakteristikk til profil 2: alder. Bakgrunnsvariabel til r7pad6.           | diskret | character-6  | 4689    | 0       | -        |
| 145 | <a href="#">r7pad6_p..</a> | Karakteristikk til profil 2: kjønn. Bakgrunnsvariabel til r7pad6.           | diskret | character-6  | 4689    | 0       | -        |
| 146 | <a href="#">r7pad6_p..</a> | Karakteristikk til profil 2: bosted. Bakgrunnsvariabel til r7pad6.          | diskret | character-10 | 4689    | 0       | -        |
| 147 | <a href="#">r7pad6_p..</a> | Karakteristikk til profil 2: sivilstatus. Bakgrunnsvariabel til r7pad6.     | diskret | character-9  | 4689    | 0       | -        |
| 148 | <a href="#">r7pad6_p..</a> | Karakteristikk til profil 2: utdanning. Bakgrunnsvariabel til r7pad6.       | diskret | character-13 | 4689    | 0       | -        |
| 149 | <a href="#">r7pad6_p..</a> | Karakteristikk til profil 2: religion. Bakgrunnsvariabel til r7pad6.        | diskret | character-10 | 4689    | 0       | -        |
| 150 | <a href="#">r7pad6_p..</a> | Karakteristikk til profil 2: arbeidserfaring. Bakgrunnsvariabel til r7pad6. | diskret | character-28 | 4689    | 0       | -        |
| 151 | <a href="#">r7pad7_p..</a> | Karakteristikk til profil 1: alder. Bakgrunnsvariabel til r7pad7.           | diskret | character-6  | 4689    | 0       | -        |
| 152 | <a href="#">r7pad7_p..</a> | Karakteristikk til profil 1: kjønn. Bakgrunnsvariabel til r7pad7.           | diskret | character-6  | 4689    | 0       | -        |
| 153 | <a href="#">r7pad7_p..</a> | Karakteristikk til profil 1: bosted. Bakgrunnsvariabel til r7pad7.          | diskret | character-10 | 4689    | 0       | -        |
| 154 | <a href="#">r7pad7_p..</a> | Karakteristikk til profil 1: sivilstatus. Bakgrunnsvariabel til r7pad7.     | diskret | character-9  | 4689    | 0       | -        |
| 155 | <a href="#">r7pad7_p..</a> | Karakteristikk til profil 1: utdanning. Bakgrunnsvariabel til r7pad7.       | diskret | character-13 | 4689    | 0       | -        |
| 156 | <a href="#">r7pad7_p..</a> | Karakteristikk til profil 1: religion. Bakgrunnsvariabel til r7pad7.        | diskret | character-10 | 4689    | 0       | -        |
| 157 | <a href="#">r7pad7_p..</a> | Karakteristikk til profil 1: arbeidserfaring. Bakgrunnsvariabel til r7pad7. | diskret | character-28 | 4689    | 0       | -        |



**Fil Norsk medborgerpanel - runde 7**

| #   | Navn                       | Merkelapp                                                                   | Type    | Format       | Gyldige | Ugyldig | Spørsmål |
|-----|----------------------------|-----------------------------------------------------------------------------|---------|--------------|---------|---------|----------|
| 158 | <a href="#">r7pad7_p..</a> | Karakteristikk til profil 2: alder. Bakgrunnsvariabel til r7pad7.           | diskret | character-6  | 4689    | 0       | -        |
| 159 | <a href="#">r7pad7_p..</a> | Karakteristikk til profil 2: kjønn. Bakgrunnsvariabel til r7pad7.           | diskret | character-6  | 4689    | 0       | -        |
| 160 | <a href="#">r7pad7_p..</a> | Karakteristikk til profil 2: bosted. Bakgrunnsvariabel til r7pad7.          | diskret | character-10 | 4689    | 0       | -        |
| 161 | <a href="#">r7pad7_p..</a> | Karakteristikk til profil 2: sivilstatus. Bakgrunnsvariabel til r7pad7.     | diskret | character-9  | 4689    | 0       | -        |
| 162 | <a href="#">r7pad7_p..</a> | Karakteristikk til profil 2: utdanning. Bakgrunnsvariabel til r7pad7.       | diskret | character-13 | 4689    | 0       | -        |
| 163 | <a href="#">r7pad7_p..</a> | Karakteristikk til profil 2: religion. Bakgrunnsvariabel til r7pad7.        | diskret | character-10 | 4689    | 0       | -        |
| 164 | <a href="#">r7pad7_p..</a> | Karakteristikk til profil 2: arbeidserfaring. Bakgrunnsvariabel til r7pad7. | diskret | character-28 | 4689    | 0       | -        |
| 165 | <a href="#">r7pad8_p..</a> | Karakteristikk til profil 1: alder. Bakgrunnsvariabel til r7pad8.           | diskret | character-6  | 4689    | 0       | -        |
| 166 | <a href="#">r7pad8_p..</a> | Karakteristikk til profil 1: kjønn. Bakgrunnsvariabel til r7pad8.           | diskret | character-6  | 4689    | 0       | -        |
| 167 | <a href="#">r7pad8_p..</a> | Karakteristikk til profil 1: bosted. Bakgrunnsvariabel til r7pad8.          | diskret | character-10 | 4689    | 0       | -        |
| 168 | <a href="#">r7pad8_p..</a> | Karakteristikk til profil 1: sivilstatus. Bakgrunnsvariabel til r7pad8.     | diskret | character-9  | 4689    | 0       | -        |
| 169 | <a href="#">r7pad8_p..</a> | Karakteristikk til profil 1: utdanning. Bakgrunnsvariabel til r7pad8.       | diskret | character-13 | 4689    | 0       | -        |
| 170 | <a href="#">r7pad8_p..</a> | Karakteristikk til profil 1: religion. Bakgrunnsvariabel til r7pad8.        | diskret | character-10 | 4689    | 0       | -        |
| 171 | <a href="#">r7pad8_p..</a> | Karakteristikk til profil 1: arbeidserfaring. Bakgrunnsvariabel til r7pad8. | diskret | character-28 | 4689    | 0       | -        |
| 172 | <a href="#">r7pad8_p..</a> | Karakteristikk til profil 2: alder. Bakgrunnsvariabel til r7pad8.           | diskret | character-6  | 4689    | 0       | -        |
| 173 | <a href="#">r7pad8_p..</a> | Karakteristikk til profil 2: kjønn. Bakgrunnsvariabel til r7pad8.           | diskret | character-6  | 4689    | 0       | -        |
| 174 | <a href="#">r7pad8_p..</a> | Karakteristikk til profil 2: bosted. Bakgrunnsvariabel til r7pad8.          | diskret | character-10 | 4689    | 0       | -        |
| 175 | <a href="#">r7pad8_p..</a> | Karakteristikk til profil 2: sivilstatus. Bakgrunnsvariabel til r7pad8.     | diskret | character-9  | 4689    | 0       | -        |

**Fil Norsk medborgerpanel - runde 7**

| #   | Navn                       | Merkelapp                                                                                                                                          | Type    | Format       | Gyldige | Ugyldig | Spørsmål                                                                                                                                                                                                                      |
|-----|----------------------------|----------------------------------------------------------------------------------------------------------------------------------------------------|---------|--------------|---------|---------|-------------------------------------------------------------------------------------------------------------------------------------------------------------------------------------------------------------------------------|
| 176 | <a href="#">r7pad8_p..</a> | Karakteristikk til profil 2: utdanning. Bakgrunnsvariabel til r7pad8.                                                                              | diskret | character-13 | 4689    | 0       | -                                                                                                                                                                                                                             |
| 177 | <a href="#">r7pad8_p..</a> | Karakteristikk til profil 2: religion. Bakgrunnsvariabel til r7pad8.                                                                               | diskret | character-10 | 4689    | 0       | -                                                                                                                                                                                                                             |
| 178 | <a href="#">r7pad8_p..</a> | Karakteristikk til profil 2: arbeidserfaring. Bakgrunnsvariabel til r7pad8.                                                                        | diskret | character-28 | 4689    | 0       | -                                                                                                                                                                                                                             |
| 179 | <a href="#">r7ran34</a>    | [Randomiserer hvis u=3. ]                                                                                                                          | diskret | numeric-12.0 | 1092    | 3597    | -                                                                                                                                                                                                                             |
| 180 | <a href="#">r7pad6a</a>    | Holdninger relatert til bakgrunn: Personer, «Staten bør bidra til å redusere inntektsforskjeller i samfunnet»                                      | diskret | numeric-12.0 | 4689    | 0       | «Staten bør bidra til å redusere inntektsforskjeller i samfunnet.» [Her følger en liste over tilfeldig valgte personkarakteristikker. Se bakgrunnsvariabler.]                                                                 |
| 181 | <a href="#">r7pad6b</a>    | Holdninger relatert til bakgrunn: Politikere, «Staten bør bidra til å redusere inntektsforskjeller i samfunnet»                                    | diskret | numeric-12.0 | 4689    | 0       | «Staten bør bidra til å redusere inntektsforskjeller i samfunnet.» [Her følger en liste over tilfeldig valgte personkarakteristikker. Se bakgrunnsvariabler.]                                                                 |
| 182 | <a href="#">r7pad7a</a>    | Holdninger relatert til bakgrunn: Personer, «Flyktninger bør ha samme rett til sosialhjelp som nordmenn, selv om de ikke er norske statsborgere»   | diskret | numeric-12.0 | 4689    | 0       | «Flyktninger bør ha samme rett til sosialhjelp som nordmenn, selv om de ikke er norske statsborgere.» [Her følger en liste over tilfeldig valgte personkarakteristikker. Se bakgrunnsvariabler.]                              |
| 183 | <a href="#">r7pad7b</a>    | Holdninger relatert til bakgrunn: Politikere, «Flyktninger bør ha samme rett til sosialhjelp som nordmenn, selv om de ikke er norske statsborgere» | diskret | numeric-12.0 | 4689    | 0       | «Flyktninger bør ha samme rett til sosialhjelp som nordmenn, selv om de ikke er norske statsborgere.» [Her følger en liste over tilfeldig valgte personkarakteristikker. Se bakgrunnsvariabler.]                              |
| 184 | <a href="#">r7pad8a</a>    | Holdninger relatert til bakgrunn: Personer, «Mesteparten av utslippsreduksjonene som Norge har forpliktet seg til bør tas i utlandet»              | diskret | numeric-12.0 | 4689    | 0       | «Mesteparten av utslippsreduksjonene som Norge har forpliktet seg til bør tas i utlandet.» [Her følger en liste over tilfeldig valgte personkarakteristikker. Se bakgrunnsvariabler.]                                         |
| 185 | <a href="#">r7pad8b</a>    | Holdninger relatert til bakgrunn: Politikere, «Mesteparten av utslippsreduksjonene som Norge har forpliktet seg til bør tas i utlandet»            | diskret | numeric-12.0 | 4689    | 0       | «Mesteparten av utslippsreduksjonene som Norge har forpliktet seg til bør tas i utlandet.» [Her følger en liste over tilfeldig valgte personkarakteristikker. Se bakgrunnsvariabler.]                                         |
| 186 | <a href="#">r7fri1_1</a>   | Utført frivillig arbeid: Kunst og kultur, korps og kor                                                                                             | diskret | numeric-12.0 | 4689    | 0       | Kunst og kultur, korps og kor[Musikk, teater og dans. Kunst, brukskunst og arkitektur. Historie, litteratur og språk. Museer, samlinger og biblioteker. Tidsskrifter og medier. Andre kulturelle og kunstneriske aktiviteter] |
| 187 | <a href="#">r7fri1_2</a>   | Utført frivillig arbeid: Idrett og sport                                                                                                           | diskret | numeric-12.0 | 4689    | 0       | Idrett og sport[Alle typer idrett, sport og trim, skytterlag, bedriftsidrett og idrett for funksjonshemmede]                                                                                                                  |
| 188 | <a href="#">r7fri1_3</a>   | Utført frivillig arbeid: Hobby, fritid, utendørsaktivitet                                                                                          | diskret | numeric-12.0 | 4689    | 0       | Hobby, fritid, utendørsaktivitet[Friluftsliv og speideren. Motor og båtforening. Dyreeierklubber. Pensjonistlag. Studentsamfunn. Sosiale klubber –                                                                            |

**Fil Norsk medborgerpanel - runde 7**

| #   | Navn                      | Merkelapp                                                                                        | Type    | Format       | Gyldige | Ugyldig | Spørsmål                                                                                                                                                                                                                                                                                      |
|-----|---------------------------|--------------------------------------------------------------------------------------------------|---------|--------------|---------|---------|-----------------------------------------------------------------------------------------------------------------------------------------------------------------------------------------------------------------------------------------------------------------------------------------------|
|     |                           |                                                                                                  |         |              |         |         | Rotary, Lions etc. Andre hobby- og fritidsaktiviteter]                                                                                                                                                                                                                                        |
| 189 | <a href="#">r7fri1_4</a>  | Utført frivillig arbeid: Utdanning, opplæring og forskning                                       | diskret | numeric-12.0 | 4689    | 0       | Utdanning, opplæring og forskning[Barne- og ungdomsskoler inkludert FAU i offentlige skoler, men dugnader bare i private skoler. Videregående skoler. Folkehøgskoler. Universiteter og høyskoler. Yrkesrettet/ teknisk utdanning. Voksenopplæring og videreutdanning. Forskning og utvikling] |
| 190 | <a href="#">r7fri1_5</a>  | Utført frivillig arbeid: Helse, pleie og redningsarbeid                                          | diskret | numeric-12.0 | 4689    | 0       | Helse, pleie og redningsarbeid[Sykehus. Rehabilitering. Sykehjem. Omsorgsbolig og hjemmetjenestene. Psykiatriske institusjoner. Polikliniske helsetjenester. Alternativ medisin. Redningsarbeid og ambulansetjenester]                                                                        |
| 191 | <a href="#">r7fri1_6</a>  | Utført frivillig arbeid: Sosiale tjenester og rusmiddelomsorg                                    | diskret | numeric-12.0 | 4689    | 0       | Sosiale tjenester og rusmiddelomsorg[Barnehager. Røde kors. Blå kors. Norsk folkehjelp. Familierådgiving. Krisesentre og -telefoner. Tjenester for funksjonshemmede. Tjenester for eldre. Selvhjelp og frivillighetssentraler]                                                                |
| 192 | <a href="#">r7fri1_7</a>  | Utført frivillig arbeid: Natur-, miljø- og dyrever                                               | diskret | numeric-12.0 | 4689    | 0       | Natur-, miljø- og dyrever[Natur- og miljøvern. Områdevern og områdeforvaltning. Dyrever. Veterinærtjenester]                                                                                                                                                                                  |
| 193 | <a href="#">r7fri1_8</a>  | Utført frivillig arbeid: Velforeninger, grendelag og nærmiljø                                    | diskret | numeric-12.0 | 4689    | 0       | Velforeninger, grendelag og nærmiljø[Forsamlingshus]                                                                                                                                                                                                                                          |
| 194 | <a href="#">r7fri1_9</a>  | Utført frivillig arbeid: Borettslag og boligbyggelag                                             | diskret | numeric-12.0 | 4689    | 0       | Borettslag og boligbyggelag[Huseierforening]                                                                                                                                                                                                                                                  |
| 195 | <a href="#">r7fri1_10</a> | Utført frivillig arbeid: Rettighets-, støtte- og påvirkningsarbeid                               | diskret | numeric-12.0 | 4689    | 0       | Rettighets-, støtte- og påvirkningsarbeid[Funksjonshemmede og syke. Kvinnesak. Mållag. Etniske minoriteter. Svake/utsatte grupper, innsatte, fattige. Kampanjer og lobbyvirksomhet]                                                                                                           |
| 196 | <a href="#">r7fri1_11</a> | Utført frivillig arbeid: Politiske partier                                                       | diskret | numeric-12.0 | 4689    | 0       | Politiske partier[Ungdomspartier]                                                                                                                                                                                                                                                             |
| 197 | <a href="#">r7fri1_12</a> | Utført frivillig arbeid: Internasjonal utveksling, nødhjelp, bistand og menneskerettighetsarbeid | diskret | numeric-12.0 | 4689    | 0       | Internasjonal utveksling, nødhjelp, bistand og menneskerettighetsarbeid[Internasjonale vennskaps- og utvekslingsprogrammer. Internasjonalt nødhjelps- og bistandsarbeid. Menneskerettighets- og fredsarbeid]                                                                                  |
| 198 | <a href="#">r7fri1_13</a> | Utført frivillig arbeid: Yrkes-, bransje- og fagforeninger                                       | diskret | numeric-12.0 | 4689    | 0       | Yrkes-, bransje- og fagforeninger[Arbeidstakerorganisasjoner. Arbeidsgiverorganisasjoner. Bransje- og næringssammenslutninger. Produsentkooperativer. Elev- og studentorganisasjoner.]                                                                                                        |
| 199 | <a href="#">r7fri1_14</a> | Utført frivillig arbeid: Religion og livssyn inkludert den norske kirke                          | diskret | numeric-12.0 | 4689    | 0       | Religion og livssyn inkludert den norske kirke[Organisasjoner tilknyttet den norske kirke. Misjon. Protestantisk frikirke. Andre religioner.]                                                                                                                                                 |

**Fil Norsk medborgerpanel - runde 7**

| #   | Navn                       | Merkelapp                                                                                     | Type    | Format       | Gyldige | Ugyldig | Spørsmål                                                                                                      |
|-----|----------------------------|-----------------------------------------------------------------------------------------------|---------|--------------|---------|---------|---------------------------------------------------------------------------------------------------------------|
|     |                            |                                                                                               |         |              |         |         | Livssynsorganisasjoner, også ikke-religiøse som Humanetisk forbund]                                           |
| 200 | <a href="#">r7fri1_15</a>  | Utført frivillig arbeid: Innvandrorganisasjoner                                               | diskret | numeric-12.0 | 4689    | 0       | Innvandrorganisasjoner[Organisasjoner knyttet til landbakgrunn, kultur, identitet utenfor Norge]              |
| 201 | <a href="#">r7fri1_16</a>  | Utført frivillig arbeid: Annet, spesifiser                                                    | diskret | numeric-12.0 | 4689    | 0       | Annet, spesifiser                                                                                             |
| 202 | <a href="#">r7fri1_1..</a> | Utført frivillig arbeid: Annet, spesifiser [anonymisert]                                      | diskret | character-34 | 4689    | 0       | Annet, spesifiser                                                                                             |
| 203 | <a href="#">r7fri1_17</a>  | Nei, ikke utført frivillig arbeid                                                             | diskret | numeric-12.0 | 4689    | 0       | Nei                                                                                                           |
| 204 | <a href="#">r7fri2</a>     | Hvor mye tid på frivillig arbeid i uken, det siste året                                       | diskret | numeric-12.0 | 4689    | 0       | Om du tenker på det siste året under ett, omtrent hvor mye tid brukte du på frivillig arbeid i en vanlig uke? |
| 205 | <a href="#">r7fri1b_1</a>  | Utført hvilket frivillig arbeid innenfor helse/pleie/redningsarbeid: Helse                    | diskret | numeric-12.0 | 4689    | 0       | Helse                                                                                                         |
| 206 | <a href="#">r7fri1b_2</a>  | Utført hvilket frivillig arbeid innenfor helse/pleie/redningsarbeid: Pleie                    | diskret | numeric-12.0 | 4689    | 0       | Pleie                                                                                                         |
| 207 | <a href="#">r7fri1b_3</a>  | Utført hvilket frivillig arbeid innenfor helse/pleie/redningsarbeid: Beredskap/Redningsarbeid | diskret | numeric-12.0 | 4689    | 0       | Beredskap/Redningsarbeid                                                                                      |
| 208 | <a href="#">r7fri4_1</a>   | Kjennskap til beredskapsarbeidet i Norge                                                      | diskret | numeric-12.0 | 4689    | 0       | Hvor godt vil du si at du kjenner til beredskapsarbeidet i Norge?                                             |
| 209 | <a href="#">r7fri4_2</a>   | Kjennskap til de frivillige beredskapsorganisasjonene                                         | diskret | numeric-12.0 | 4689    | 0       | Hvor godt vil du si at du kjenner til de frivillige beredskapsorganisasjonene?                                |
| 210 | <a href="#">r7fri4c_1</a>  | Hørt om frivillige beredskapsorganisasjoner: NAKs flytjeneste                                 | diskret | numeric-12.0 | 4689    | 0       | NAKs flytjeneste                                                                                              |
| 211 | <a href="#">r7fri4c_2</a>  | Hørt om frivillig beredskapsorganisasjon: Norske redningshunder                               | diskret | numeric-12.0 | 4689    | 0       | Norske redningshunder                                                                                         |
| 212 | <a href="#">r7fri4c_3</a>  | Hørt om frivillig beredskapsorganisasjon: Norsk Folkehjelp Sanitet                            | diskret | numeric-12.0 | 4689    | 0       | Norsk Folkehjelp Sanitet                                                                                      |
| 213 | <a href="#">r7fri4c_4</a>  | Hørt om frivillig beredskapsorganisasjon: Norsk Grotteforbund                                 | diskret | numeric-12.0 | 4689    | 0       | Norsk Grotteforbund                                                                                           |
| 214 | <a href="#">r7fri4c_5</a>  | Hørt om frivillig beredskapsorganisasjon: Norsk Radio Relæ Liga                               | diskret | numeric-12.0 | 4689    | 0       | Norsk Radio Relæ Liga                                                                                         |
| 215 | <a href="#">r7fri4c_6</a>  | Hørt om frivillig beredskapsorganisasjon: Rovernes Beredskapsgruppe                           | diskret | numeric-12.0 | 4689    | 0       | Rovernes Beredskapsgruppe                                                                                     |
| 216 | <a href="#">r7fri4c_7</a>  | Hørt om frivillig beredskapsorganisasjon: Røde Kors Hjelpekorps                               | diskret | numeric-12.0 | 4689    | 0       | Røde Kors Hjelpekorps                                                                                         |
| 217 | <a href="#">r7fri4c_8</a>  | Hørt om frivillig beredskapsorganisasjon: Redningsselskapet                                   | diskret | numeric-12.0 | 4689    | 0       | Redningsselskapet                                                                                             |

**Fil Norsk medborgerpanel - runde 7**

| #   | Navn                      | Merkelapp                                                                                                                  | Type    | Format       | Gyldige | Ugyldig | Spørsmål                                                                                                                                              |
|-----|---------------------------|----------------------------------------------------------------------------------------------------------------------------|---------|--------------|---------|---------|-------------------------------------------------------------------------------------------------------------------------------------------------------|
| 218 | <a href="#">r7fri4d</a>   | Medlem av organisasjon som deltar i beredskapsarbeid i Norge                                                               | diskret | numeric-12.0 | 4689    | 0       | Er du medlem av en organisasjon som deltar i beredskapsarbeidet i Norge?                                                                              |
| 219 | <a href="#">r7fri4e</a>   | Deltatt som frivillig ved en søk og redningsaksjon                                                                         | diskret | numeric-12.0 | 4689    | 0       | Har du deltatt som frivillig ved en søk og redningsaksjon?                                                                                            |
| 220 | <a href="#">r7fri4f</a>   | Bistått politi/frivillige organisasjoner som frivillig ved en ulykke                                                       | diskret | numeric-12.0 | 4689    | 0       | Har du som frivillig bistått politi eller frivillige organisasjoner ved en ulykke?                                                                    |
| 221 | <a href="#">r7ran38</a>   | [Randomiserer hvis u=1 og R7FRI4d=2. ]                                                                                     | diskret | numeric-12.0 | 1004    | 3685    | -                                                                                                                                                     |
| 222 | <a href="#">r7fri4g</a>   | Kunne du tenke deg å bli medlem i en slik organisasjon? (Medlemmer må gjennomføre kurs og være klar ved øyeblikks varsel). | diskret | numeric-12.0 | 4689    | 0       | Kunne du tenke deg å bli medlem i en slik organisasjon?                                                                                               |
| 223 | <a href="#">r7fri4g1</a>  | Hvis nei, hvorfor ikke? [anonymisert]                                                                                      | diskret | character-52 | 4689    | 0       | Hvis nei, hvorfor ikke?                                                                                                                               |
| 224 | <a href="#">r7fri4h</a>   | Kunne du tenke deg å bli medlem i en beredskapsorganisasjon?                                                               | diskret | numeric-12.0 | 4689    | 0       | Kunne du tenke deg å bli medlem i en beredskapsorganisasjon?                                                                                          |
| 225 | <a href="#">r7fri4h1</a>  | Hvis nei, hvorfor ikke? [anonymisert]                                                                                      | diskret | character-53 | 4689    | 0       | Hvis nei, hvorfor ikke?                                                                                                                               |
| 226 | <a href="#">r7fri4i</a>   | Sannsynlighet for å bistå ved søk og redningsoppdrag: Spurt av politiet                                                    | diskret | numeric-12.0 | 4689    | 0       | Dersom du ble spurt av politiet om å bistå ved et søk og redningsoppdrag, hvor sannsynlig er det at du ville deltatt?                                 |
| 227 | <a href="#">r7fri4j</a>   | Sannsynlighet for å bistå ved søk og redningsoppdrag: Bedt av frivillig organisasjon                                       | diskret | numeric-12.0 | 4689    | 0       | Dersom du ble bedt av en frivillig organisasjon om å bistå ved et søk og redningsoppdrag, hvor sannsynlig er det at du ville deltatt?                 |
| 228 | <a href="#">r7fri4k</a>   | Sannsynlighet for å bistå ved søk og redningsoppdrag: Bedt av familie/omgangskrets                                         | diskret | numeric-12.0 | 4689    | 0       | Dersom du ble bedt av familien din eller andre i din omgangskrets om å delta i et søk og redningsoppdrag, hvor sannsynlig er det at du ville deltatt? |
| 229 | <a href="#">r7fri4l_1</a> | Påstand: Frivillige organisasjoners rolle i beredskapsarbeid lite synlig i media                                           | diskret | numeric-12.0 | 4689    | 0       | De frivillige organisasjonenes rolle i beredskapsarbeidet er lite synlig i media.                                                                     |
| 230 | <a href="#">r7fri4l_2</a> | Påstand: Viktig for min deltakelse i redningsarbeid at jeg kjenner medlemmer av organisasjonen personlig                   | diskret | numeric-12.0 | 4689    | 0       | Hvis jeg skal delta som frivillig i redningsarbeid er det viktig at jeg kjenner ledere eller andre medlemmer av organisasjonen personlig.             |
| 231 | <a href="#">r7fri4l_3</a> | Påstand: Beredskapsarbeid bør være offentlig ansvar forbeholdt offentlige institusjoner                                    | diskret | numeric-12.0 | 4689    | 0       | Beredskapsarbeid bør være et offentlig ansvar forbeholdt offentlige institusjoner.                                                                    |
| 232 | <a href="#">r7fri4l_4</a> | Påstand: Frivillige organisasjoner bør ha viktig rolle i beredskapsarbeid                                                  | diskret | numeric-12.0 | 4689    | 0       | Frivillige organisasjoner bør ha en viktig rolle i beredskapsarbeidet i Norge.                                                                        |
| 233 | <a href="#">r7fri4l_5</a> | Påstand: Avgjørende for min deltakelse i redningsarbeid å få fri med lønn av arbeidsgiver under oppdrag                    | diskret | numeric-12.0 | 4689    | 0       | Hvis jeg skal delta i frivillig redningsarbeid er det avgjørende at arbeidsgiver gir meg fri med lønn under oppdrag.                                  |
| 234 | <a href="#">r7fri11</a>   | Hvor god er helsen din?                                                                                                    | diskret | numeric-12.0 | 4689    | 0       | Generelt sett, hvor god er helsen din?                                                                                                                |

**Fil Norsk medborgerpanel - runde 7**

| #   | Navn                       | Merkelapp                                                                                                       | Type    | Format       | Gyldige | Ugyldig | Spørsmål                                                                                                                            |
|-----|----------------------------|-----------------------------------------------------------------------------------------------------------------|---------|--------------|---------|---------|-------------------------------------------------------------------------------------------------------------------------------------|
| 235 | <a href="#">r7fri12</a>    | Har du helseproblem forventet å vedvare minst seks måneder?                                                     | diskret | numeric-12.0 | 4689    | 0       | Har du noen former for kronisk sykdom eller helseproblem som er forventet å vedvare minst seks måneder eller lengre?                |
| 236 | <a href="#">r7fri13</a>    | Har, grunnet helseproblemer, vært hindret fra utføring av vanlige aktiviteter i løpet av de seks siste månedene | diskret | numeric-12.0 | 4689    | 0       | I løpet av de seks siste månedene, har du på grunn av helseproblemer vært hindret fra å utføre aktiviteter som folk vanligvis gjør? |
| 237 | <a href="#">r7fri32</a>    | Grad av tilfredshet med livet nå om dagen                                                                       | diskret | numeric-12.0 | 4689    | 0       | I hvor stor grad er du tilfreds med livet nå om dagen?                                                                              |
| 238 | <a href="#">r7fri33</a>    | I hvor stor grad synes du det du gjør i livet er meningsfullt?                                                  | diskret | numeric-12.0 | 4689    | 0       | Alt i alt, i hvor stor grad synes du det du gjør i livet er meningsfullt?                                                           |
| 239 | <a href="#">r7fri36_1</a>  | Hvor fornøyd med: Din levestandard                                                                              | diskret | numeric-12.0 | 4689    | 0       | Din levestandard                                                                                                                    |
| 240 | <a href="#">r7fri36_2</a>  | Hvor fornøyd med: Din helse                                                                                     | diskret | numeric-12.0 | 4689    | 0       | Din helse                                                                                                                           |
| 241 | <a href="#">r7fri36_3</a>  | Hvor fornøyd med: Det du oppnår i livet                                                                         | diskret | numeric-12.0 | 4689    | 0       | Det du oppnår i livet                                                                                                               |
| 242 | <a href="#">r7fri36_4</a>  | Hvor fornøyd med: Personlige relasjoner                                                                         | diskret | numeric-12.0 | 4689    | 0       | Dine personlige relasjoner                                                                                                          |
| 243 | <a href="#">r7fri36_5</a>  | Hvor fornøyd med: Følelse av trygghet                                                                           | diskret | numeric-12.0 | 4689    | 0       | Hvor trygg du føler deg                                                                                                             |
| 244 | <a href="#">r7fri36_6</a>  | Hvor fornøyd med: Følelsen av å være del av nabofellesskap                                                      | diskret | numeric-12.0 | 4689    | 0       | Følelsen av å være del av et nabofellesskap                                                                                         |
| 245 | <a href="#">r7fri36_7</a>  | Hvor fornøyd med: Utsikt til fremtidig trygghet                                                                 | diskret | numeric-12.0 | 4689    | 0       | Utsiktene til fremtidig trygghet                                                                                                    |
| 246 | <a href="#">r7fri36_8</a>  | Hvor fornøyd med: Mengde tid til det du liker å gjøre                                                           | diskret | numeric-12.0 | 4689    | 0       | Mengden tid du har til å gjøre tingene du liker å gjøre                                                                             |
| 247 | <a href="#">r7fri36_9</a>  | Hvor fornøyd med: Kvalitet på natur og miljø i nærområde                                                        | diskret | numeric-12.0 | 4689    | 0       | Kvaliteten på natur og miljø i ditt nærområde                                                                                       |
| 248 | <a href="#">r7fri36_10</a> | Hvor fornøyd med: Jobben din                                                                                    | diskret | numeric-12.0 | 4689    | 0       | Jobben din                                                                                                                          |
| 249 | <a href="#">r7friend</a>   | Antall venner                                                                                                   | diskret | numeric-12.0 | 4689    | 0       | Omtrent hvor mange venner har du for tiden?                                                                                         |
| 250 | <a href="#">r7frnet_1</a>  | Er det noen i omgangskretsen som: Kan hjelpe deg å finne jobb                                                   | diskret | numeric-12.0 | 4689    | 0       | Vil kunne hjelpe deg å finne en jobb, hvis det blir nødvendig?                                                                      |
| 251 | <a href="#">r7frnet_2</a>  | Er det noen i omgangskretsen som: Kan låne deg et større pengebeløp                                             | diskret | numeric-12.0 | 4689    | 0       | Vil kunne låne deg et større pengebeløp (f.eks. 20 000 kroner)?                                                                     |
| 252 | <a href="#">r7frnet_3</a>  | Er det noen i omgangskretsen som: Sitter i en høy stilling i næringslivet/offentlig/politikk                    | diskret | numeric-12.0 | 4689    | 0       | Sitter i en høy stilling i næringslivet, i offentlig administrasjon eller i politikken?                                             |
| 253 | <a href="#">r7frnet_4</a>  | Har ingen slike i omgangskrets                                                                                  | diskret | numeric-12.0 | 4689    | 0       | Jeg har ingen slike personer i min omgangskrets                                                                                     |
| 254 | <a href="#">r7fri5</a>     | Hvor ofte drar du på reiser med minst én overnatting?                                                           | diskret | numeric-12.0 | 4689    | 0       | Hvor ofte drar du vanligvis på reiser med minst én overnatting?                                                                     |
| 255 | <a href="#">r7fri5b</a>    | Reise i minst 3 uker sammenhengende i løpet av det siste året?                                                  | diskret | numeric-12.0 | 4689    | 0       | Har du oppholdt deg på reise i minst 3 uker sammenhengende i løpet av det siste året?                                               |

**Fil Norsk medborgerpanel - runde 7**

| #   | Navn                      | Merkelapp                                                           | Type         | Format       | Gyldige | Ugyldig | Spørsmål                                                                                                                                                                          |
|-----|---------------------------|---------------------------------------------------------------------|--------------|--------------|---------|---------|-----------------------------------------------------------------------------------------------------------------------------------------------------------------------------------|
| 256 | <a href="#">r7fri5c_1</a> | Lengde på lengste tur det siste året                                | kontinuerlig | numeric-12.0 | 4689    | 0       | Hvor lenge varte den lengste reisen din det siste året?                                                                                                                           |
| 257 | <a href="#">r7fri6</a>    | Tid brukt på hobby- og fritidsaktiviteter en vanlig uke             | diskret      | numeric-12.0 | 4689    | 0       | Hvor mye tid bruker du på hobby- og fritidsaktiviteter i løpet av en vanlig uke?                                                                                                  |
| 258 | <a href="#">r7fri7_1</a>  | Gir hjelp til: Slektninger du ikke bor med, naboer/venner/ kolleger | diskret      | numeric-12.0 | 4689    | 0       | Slektninger du ikke bor sammen med, naboer, venner eller kolleger (f.eks. hjelp til skyss, matinnkjøp, hagearbeid, rydding og vasking, tilsyn og pass, omsorg eller annen hjelp). |
| 259 | <a href="#">r7fri7_2</a>  | Gir hjelp til: Noen i husholdningen med spesielle omsorgsbehov      | diskret      | numeric-12.0 | 4689    | 0       | Noen i din egen husholdning som har spesielle omsorgsbehov (f.eks. hjelp til eldre, syke og funksjonshemmede).                                                                    |
| 260 | <a href="#">r7fri7_3</a>  | Gir hjelp til: Nei                                                  | diskret      | numeric-12.0 | 4689    | 0       | Nei                                                                                                                                                                               |
| 261 | <a href="#">r7fri7_4</a>  | Gir hjelp til: Vet ikke                                             | diskret      | numeric-12.0 | 4689    | 0       | Vet ikke                                                                                                                                                                          |
| 262 | <a href="#">r7fri7b_1</a> | Utfører type hjelp: Samvær                                          | diskret      | numeric-12.0 | 4689    | 0       | Samvær, kontakt                                                                                                                                                                   |
| 263 | <a href="#">r7fri7b_2</a> | Utfører type hjelp: Tilsyn                                          | diskret      | numeric-12.0 | 4689    | 0       | Pass eller tilsyn (f.eks. barnepass, regelmessig telefonkontakt, annet pass)                                                                                                      |
| 264 | <a href="#">r7fri7b_3</a> | Utfører type hjelp: Personlig omsorg                                | diskret      | numeric-12.0 | 4689    | 0       | Personlig omsorg (f.eks. hygiene, hjelp til medisiner, forflytning)                                                                                                               |
| 265 | <a href="#">r7fri7b_4</a> | Utfører type hjelp: Husarbeid                                       | diskret      | numeric-12.0 | 4689    | 0       | Husarbeid (f.eks. vask, matlaging, matinnkjøp)                                                                                                                                    |
| 266 | <a href="#">r7fri7b_5</a> | Utfører type hjelp: Administrativt                                  | diskret      | numeric-12.0 | 4689    | 0       | Administrative oppgaver (f.eks. kontakt med myndigheter, helsehjelp eller bank)                                                                                                   |
| 267 | <a href="#">r7fri7b_6</a> | Utfører type hjelp: Transport                                       | diskret      | numeric-12.0 | 4689    | 0       | Transport (f.eks. skyss med bil, hente/levere i barnehage/på skole)                                                                                                               |
| 268 | <a href="#">r7fri7b_7</a> | Utfører type hjelp: Hagearbeid eller lignende                       | diskret      | numeric-12.0 | 4689    | 0       | Hagearbeid, reparasjoner i hjemmet e.l.                                                                                                                                           |
| 269 | <a href="#">r7fri7b_8</a> | Utfører type hjelp: Annet                                           | diskret      | numeric-12.0 | 4689    | 0       | Annet                                                                                                                                                                             |
| 270 | <a href="#">r7fri7b_9</a> | Utfører type hjelp: Vet ikke                                        | diskret      | numeric-12.0 | 4689    | 0       | Vet ikke                                                                                                                                                                          |
| 271 | <a href="#">r7fri7c</a>   | Tid brukt på å utføre hjelp en vanlig uke                           | diskret      | numeric-12.0 | 4689    | 0       | Hvor mye tid bruker du samlet sett på dette i løpet av en vanlig uke?                                                                                                             |
| 272 | <a href="#">r7fri7d</a>   | Hvem hjelper du mest?                                               | diskret      | numeric-12.0 | 4689    | 0       | Hvem hjelper du mest?                                                                                                                                                             |
| 273 | <a href="#">r7fr31_1</a>  | Hvor godt passer beskrivelse av frivillig arbeid: Tilfredsstillende | diskret      | numeric-12.0 | 4689    | 0       | Tilfredsstillende                                                                                                                                                                 |
| 274 | <a href="#">r7fr31_2</a>  | Hvor godt passer beskrivelse av frivillig arbeid: Givende           | diskret      | numeric-12.0 | 4689    | 0       | Givende                                                                                                                                                                           |
| 275 | <a href="#">r7fr31_3</a>  | Hvor godt passer beskrivelse av frivillig arbeid: spennende         | diskret      | numeric-12.0 | 4689    | 0       | Spennende                                                                                                                                                                         |
| 276 | <a href="#">r7fr31_4</a>  | Hvor godt passer beskrivelse av frivillig arbeid: Viktig            | diskret      | numeric-12.0 | 4689    | 0       | Viktig                                                                                                                                                                            |
| 277 | <a href="#">r7fr31_5</a>  | Hvor godt passer beskrivelse av frivillig arbeid: Morsomt           | diskret      | numeric-12.0 | 4689    | 0       | Morsomt                                                                                                                                                                           |
| 278 | <a href="#">r7fr31_6</a>  | Hvor godt passer beskrivelse av frivillig arbeid: Utfordrende       | diskret      | numeric-12.0 | 4689    | 0       | Utfordrende                                                                                                                                                                       |
| 279 | <a href="#">r7fr31_7</a>  | Hvor godt passer beskrivelse av frivillig arbeid: Skuffende         | diskret      | numeric-12.0 | 4689    | 0       | Skuffende                                                                                                                                                                         |

| Fil Norsk medborgerpanel - runde 7 |                             |                                                                                                     |         |              |         |         |                                                                                                                         |
|------------------------------------|-----------------------------|-----------------------------------------------------------------------------------------------------|---------|--------------|---------|---------|-------------------------------------------------------------------------------------------------------------------------|
| #                                  | Navn                        | Merkelapp                                                                                           | Type    | Format       | Gyldige | Ugyldig | Spørsmål                                                                                                                |
| 280                                | <a href="#">r7fr31_8</a>    | Hvor godt passer beskrivelse av frivillig arbeid: Følelsesmessig utmattende                         | diskret | numeric-12.0 | 4689    | 0       | Følelsesmessig utmattende                                                                                               |
| 281                                | <a href="#">r7fr31_9</a>    | Hvor godt passer beskrivelse av frivillig arbeid: Fysisk slitsomt                                   | diskret | numeric-12.0 | 4689    | 0       | Fysisk slitsomt                                                                                                         |
| 282                                | <a href="#">r7fr31_10</a>   | Hvor godt passer beskrivelse av frivillig arbeid: Frustrerende                                      | diskret | numeric-12.0 | 4689    | 0       | Frustrerende                                                                                                            |
| 283                                | <a href="#">r7fr31_11</a>   | Hvor godt passer beskrivelse av frivillig arbeid: Deprimerende                                      | diskret | numeric-12.0 | 4689    | 0       | Deprimerende                                                                                                            |
| 284                                | <a href="#">r7fr31_12</a>   | Hvor godt passer beskrivelse av frivillig arbeid: Tidkrevende                                       | diskret | numeric-12.0 | 4689    | 0       | Tidkrevende                                                                                                             |
| 285                                | <a href="#">r7fr31_13</a>   | Hvor godt passer beskrivelse av frivillig arbeid: Lett                                              | diskret | numeric-12.0 | 4689    | 0       | Lett                                                                                                                    |
| 286                                | <a href="#">r7fri14</a>     | Har du i det siste året deltatt i aksjoner for å forbedre samfunnet?                                | diskret | numeric-12.0 | 4689    | 0       | Har du det siste året deltatt i protestaksjoner eller demonstrasjoner i et forsøk på å få til forbedringer i samfunnet? |
| 287                                | <a href="#">r7fri15</a>     | Hvem arrangerte den siste aksjonen du deltok i?                                                     | diskret | numeric-12.0 | 4689    | 0       | Om du tenker tilbake på den siste aksjonen eller demonstrasjonen du deltok i, hvem var det som arrangerte denne?        |
| 288                                | <a href="#">r7fri16</a>     | Hvilken type organisasjon/forening/parti var dette?                                                 | diskret | numeric-12.0 | 4689    | 0       | Hvilken type organisasjon, forening eller parti var dette?                                                              |
| 289                                | <a href="#">r7fri16_..</a>  | Hvilken type organisasjon/forening/parti var dette? Annet [anonymisert]                             | diskret | character-8  | 4689    | 0       | Hvilken type organisasjon, forening eller parti var dette?                                                              |
| 290                                | <a href="#">r7fri17</a>     | Hvordan fikk du først høre om denne aksjonen?                                                       | diskret | numeric-12.0 | 4689    | 0       | Hvordan fikk du først høre om denne aksjonen?                                                                           |
| 291                                | <a href="#">r7fri18</a>     | Måten du først fikk høre om aksjon                                                                  | diskret | numeric-12.0 | 4689    | 0       | På hvilken måte fikk du først høre om denne aksjonen?                                                                   |
| 292                                | <a href="#">r7km2</a>       | Bekymring for klimaendringer                                                                        | diskret | numeric-12.0 | 4689    | 0       | Hvor bekymret er du for klimaendringer?                                                                                 |
| 293                                | <a href="#">r7km3_2</a>     | Positiv/negativ til: Innskjerpe reglene for hvor mye CO2 industrien i Norge og Europa får slippe ut | diskret | numeric-12.0 | 4689    | 0       | Innskjerpe reglene for hvor mye CO2 industrien i Norge og Europa får slippe ut.                                         |
| 294                                | <a href="#">r7km3_3</a>     | Positiv/negativ til: Lagring av CO2 under havbunn/jordoverflaten                                    | diskret | numeric-12.0 | 4689    | 0       | Satse sterkere på fangst og lagring av CO2 under havbunnen eller jordoverflaten.                                        |
| 295                                | <a href="#">r7km3_4</a>     | Positiv/negativ til: Økt støtte til fornybar energi                                                 | diskret | numeric-12.0 | 4689    | 0       | Øke støtten til forskning på og utbygging av fornybar energi.                                                           |
| 296                                | <a href="#">r7km3_5</a>     | Positiv/negativ til: Skjerpe skattereglene for oljeleting norsk sokkel                              | diskret | numeric-12.0 | 4689    | 0       | Skjerpe skattereglene for oljeleting på norsk sokkel                                                                    |
| 297                                | <a href="#">r7km4</a>       | Diskusjon om bilpark, utsagn nærmest ditt syn                                                       | diskret | numeric-12.0 | 4689    | 0       | Hvilket av utsagnene nedenfor kommer nærmest ditt syn:                                                                  |
| 298                                | <a href="#">r7km4_co_..</a> | Ytterligere kommentarer [anonymisert]                                                               | diskret | character-54 | 4689    | 0       | Om du har ytterligere kommentarer, kan du skrive dem inn her:                                                           |



**Fil Norsk medborgerpanel - runde 7**

| #   | Navn                        | Merkelapp                                                                                                     | Type    | Format       | Gyldige | Ugyldig | Spørsmål                                                                                                            |
|-----|-----------------------------|---------------------------------------------------------------------------------------------------------------|---------|--------------|---------|---------|---------------------------------------------------------------------------------------------------------------------|
| 299 | <a href="#">r7km5_1</a>     | Utsagn: Teknologiske nyvinninger vil løse klimaproblemene                                                     | diskret | numeric-12.0 | 4689    | 0       | Teknologiske nyvinninger kommer til å løse klimaproblemene.                                                         |
| 300 | <a href="#">r7km5_2</a>     | Utsagn: Innbyggere i rike land bør redusere sitt forbruk                                                      | diskret | numeric-12.0 | 4689    | 0       | Innbyggere i rike land som Norge bør redusere forbruket sitt som en del av løsningen på klimautfordringen.          |
| 301 | <a href="#">r7km6</a>       | I hvor stor grad mulig å forhindre skadelige klimaendringer, utsagn nærmest ditt syn                          | diskret | numeric-12.0 | 4689    | 0       | Velg det utsagnet som kommer nærmest ditt syn:                                                                      |
| 302 | <a href="#">r7km7_1</a>     | Hvordan bør din kommune prioritere bruken av areal til matproduksjon neste ti år: Boliger                     | diskret | numeric-12.0 | 4022    | 667     | Boliger                                                                                                             |
| 303 | <a href="#">r7km7_2</a>     | Hvordan bør din kommune prioritere bruken av areal til matproduksjon neste ti år: Vei                         | diskret | numeric-12.0 | 3838    | 851     | Vei                                                                                                                 |
| 304 | <a href="#">r7km7_3</a>     | Hvordan bør din kommune prioritere bruken av areal til matproduksjon neste ti år: Matproduksjon               | diskret | numeric-12.0 | 4253    | 436     | Matproduksjon                                                                                                       |
| 305 | <a href="#">r7km7_4</a>     | Hvordan bør din kommune prioritere bruken av areal til matproduksjon neste ti år: Jernbane/T-bane/bybane osv. | diskret | numeric-12.0 | 4031    | 658     | Jernbane/T-bane/bybane osv.                                                                                         |
| 306 | <a href="#">r7km7_5</a>     | Hvordan bør din kommune prioritere bruken av areal til matproduksjon neste ti år: Næringsvirksomhet           | diskret | numeric-12.0 | 3919    | 770     | Næringsvirksomhet                                                                                                   |
| 307 | <a href="#">r7km7_6</a>     | Hvordan bør din kommune prioritere bruken av areal til matproduksjon neste ti år: Offentlige bygg             | diskret | numeric-12.0 | 4103    | 586     | Offentlige bygg: Skole, idrett osv                                                                                  |
| 308 | <a href="#">r7km8</a>       | Ville installert solcellepanel dersom offentlig støtte dekker halvparten av kostnadene                        | diskret | numeric-12.0 | 4689    | 0       | Ville du installert solcellepanel/ solfangere dersom du fikk offentlig støtte til å dekke halvparten av kostnadene? |
| 309 | <a href="#">r7km8_co...</a> | Ytterligere kommentarer [anonymisert]                                                                         | diskret | character-55 | 4689    | 0       | Om du har ytterligere kommentarer, kan du skrive dem inn her:                                                       |
| 310 | <a href="#">r7ran3</a>      | [Randomiserer hvis u=2. ]                                                                                     | diskret | numeric-12.0 | 1182    | 3507    | -                                                                                                                   |
| 311 | <a href="#">r7pilotk...</a> | Balansen mellom å bruke naturen og ønsket om å ikke skade den?                                                | diskret | numeric-12.0 | 4689    | 0       | Hvis du tenker på dagens situasjon i Norge, hvordan synes du denne balansen er i dag?                               |
| 312 | <a href="#">r7pilotk...</a> | Hvordan bør politikerne prioritere mellom naturhensyn og samfunnshensyn?                                      | diskret | numeric-12.0 | 4689    | 0       | Hvordan mener du at politikerne bør prioritere mellom naturhensyn og samfunnshensyn?                                |
| 313 | <a href="#">r7pilotk...</a> | Hvordan bør politikerne prioritere mellom naturhensyn og samfunnshensyn?                                      | diskret | numeric-12.0 | 4689    | 0       | Hvordan mener du at politikerne bør prioritere mellom naturhensyn og samfunnshensyn?                                |
| 314 | <a href="#">r7pilotk...</a> | Kommentarer [anonymisert]                                                                                     | diskret | character-53 | 4689    | 0       | Om du har noen kommentarer, kan du skrive dem her:                                                                  |
| 315 | <a href="#">r7ran4</a>      | [Randomiserer hvis u=2. ]                                                                                     | diskret | numeric-12.0 | 1182    | 3507    | -                                                                                                                   |

**Fil Norsk medborgerpanel - runde 7**

| #   | Navn                        | Merkelapp                                                                                          | Type    | Format       | Gyldige | Ugyldig | Spørsmål                                                                                                                                                        |
|-----|-----------------------------|----------------------------------------------------------------------------------------------------|---------|--------------|---------|---------|-----------------------------------------------------------------------------------------------------------------------------------------------------------------|
| 316 | <a href="#">r7pilotk_..</a> | Åpne for oljeproduksjon eller la oljen ligge ved LoVeSe: Motstanders argument                      | diskret | numeric-12.0 | 4689    | 0       | Hva synes du, bør vi åpne opp for olje- og gassproduksjon i området utenfor Lofoten, Vesterålen og Senja eller bør vi la oljen og gassen i dette området ligge? |
| 317 | <a href="#">r7pilotk_..</a> | Åpne for oljeproduksjon eller la oljen ligge ved LoVeSe: Forkjempers argument                      | diskret | numeric-12.0 | 4689    | 0       | Hva synes du, bør vi åpne opp for olje- og gassproduksjon i området utenfor Lofoten, Vesterålen og Senja eller bør vi la oljen og gassen i dette området ligge? |
| 318 | <a href="#">r7pilotk_..</a> | Åpne for oljeproduksjon eller la oljen ligge ved LoVeSe: Først motstander, så forkjempers argument | diskret | numeric-12.0 | 4689    | 0       | Hva synes du, bør vi åpne opp for olje- og gassproduksjon i området utenfor Lofoten, Vesterålen og Senja eller bør vi la oljen og gassen i dette området ligge? |
| 319 | <a href="#">r7pilotk_..</a> | Åpne for oljeproduksjon eller la oljen ligge ved LoVeSe: Først forkjemper, så motstanders argument | diskret | numeric-12.0 | 4689    | 0       | Hva synes du, bør vi åpne opp for olje- og gassproduksjon i området utenfor Lofoten, Vesterålen og Senja eller bør vi la oljen og gassen i dette området ligge? |
| 320 | <a href="#">r7pilotk_..</a> | Åpne for oljeproduksjon eller la oljen ligge ved LoVeSe                                            | diskret | numeric-12.0 | 4689    | 0       | Hva synes du, bør vi åpne opp for olje- og gassproduksjon i området utenfor Lofoten, Vesterålen og Senja eller bør vi la oljen og gassen i dette området ligge? |
| 321 | <a href="#">r7pilotk_..</a> | Kommentarer [anonymisert]                                                                          | diskret | character-53 | 4689    | 0       | Om du har noen kommentarer, kan du skrive dem her:                                                                                                              |
| 322 | <a href="#">r7km10_1</a>    | Hvilke sykdommer ville du ønsket antibiotika til: Bihulebetennelse                                 | diskret | numeric-12.0 | 4689    | 0       | Bihulebetennelse                                                                                                                                                |
| 323 | <a href="#">r7km10_2</a>    | Hvilke sykdommer ville du ønsket antibiotika til: Bronkitt                                         | diskret | numeric-12.0 | 4689    | 0       | Bronkitt                                                                                                                                                        |
| 324 | <a href="#">r7km10_3</a>    | Hvilke sykdommer ville du ønsket antibiotika til: Forkjølelse                                      | diskret | numeric-12.0 | 4689    | 0       | Forkjølelse                                                                                                                                                     |
| 325 | <a href="#">r7km10_4</a>    | Hvilke sykdommer ville du ønsket antibiotika til: Halsbetennelse                                   | diskret | numeric-12.0 | 4689    | 0       | Halsbetennelse                                                                                                                                                  |
| 326 | <a href="#">r7km10_5</a>    | Hvilke sykdommer ville du ønsket antibiotika til: Influensa                                        | diskret | numeric-12.0 | 4689    | 0       | Influensa                                                                                                                                                       |
| 327 | <a href="#">r7km10_6</a>    | Hvilke sykdommer ville du ønsket antibiotika til: Ørebetennelse                                    | diskret | numeric-12.0 | 4689    | 0       | Ørebetennelse                                                                                                                                                   |
| 328 | <a href="#">r7km10_c_..</a> | Kommentarer [anonymisert]                                                                          | diskret | character-55 | 4689    | 0       | Om du har noen kommentarer, kan du skrive dem her:                                                                                                              |
| 329 | <a href="#">r7km12_1</a>    | Vikigste årsak når oppsøke lege for luftveisinfeksjon: Plagene varer lenger enn forventet          | diskret | numeric-12.0 | 4689    | 0       | At plagene varer lenger enn jeg forventer                                                                                                                       |
| 330 | <a href="#">r7km12_2</a>    | Vikigste årsak når oppsøke lege for luftveisinfeksjon: Plage kraftigere enn forventet              | diskret | numeric-12.0 | 4689    | 0       | At plagene er kraftigere enn jeg forventer                                                                                                                      |
| 331 | <a href="#">r7km12_3</a>    | Vikigste årsak når oppsøke lege for luftveisinfeksjon: Trenger sykemelding                         | diskret | numeric-12.0 | 4689    | 0       | At jeg trenger sykemelding                                                                                                                                      |
| 332 | <a href="#">r7km12_4</a>    | Vikigste årsak når oppsøke lege for luftveisinfeksjon: Oppfordring av andre                        | diskret | numeric-12.0 | 4689    | 0       | At andre (familie, venner) oppfordrer meg til å oppsøke lege                                                                                                    |

**Fil Norsk medborgerpanel - runde 7**

| #   | Navn                       | Merkelapp                                                                                                                    | Type    | Format       | Gyldige | Ugyldig | Spørsmål                                                                                            |
|-----|----------------------------|------------------------------------------------------------------------------------------------------------------------------|---------|--------------|---------|---------|-----------------------------------------------------------------------------------------------------|
| 333 | <a href="#">r7km12_5</a>   | Vikigste årsak når oppsøke lege for luftveisinfeksjon: Bekjente med lignende plager fikk hjelp                               | diskret | numeric-12.0 | 4689    | 0       | At andre jeg kjenner med lignende plager fikk hjelp av legen                                        |
| 334 | <a href="#">r7km12_6</a>   | Vikigste årsak når oppsøke lege for luftveisinfeksjon: Annet                                                                 | diskret | numeric-12.0 | 4689    | 0       | Annet, skriv:                                                                                       |
| 335 | <a href="#">r7km12_6..</a> | Vikigste årsak når oppsøke lege for luftveisinfeksjon: Annet [anonymisert]                                                   | diskret | character-53 | 4689    | 0       | Annet, skriv:                                                                                       |
| 336 | <a href="#">r7km12_c..</a> | Kommentarer [anonymisert]                                                                                                    | diskret | character-53 | 4689    | 0       | Om du har noen kommentarer, kan du skrive dem her:                                                  |
| 337 | <a href="#">r7dvm1</a>     | Enig/uenig: Voksen asylsøker som har fått avslag, bør få opphold hvis barna har rett til å bo i landet                       | diskret | numeric-12.0 | 4689    | 0       | Hvor enig eller uenig er du i at en asylsøker som har fått avslag bør få opphold i slike tilfeller? |
| 338 | <a href="#">r7ran11</a>    | [Randomiserer hvis u=2. ]                                                                                                    | diskret | numeric-12.0 | 631     | 4058    | -                                                                                                   |
| 339 | <a href="#">r7dvm2a</a>    | Enig/uenig: Tigging bør være forbudt i Norge, østerriksk konstitusjonsdomstol                                                | diskret | numeric-12.0 | 4689    | 0       | Hvor enig eller uenig er du i at tigging bør være forbudt i Norge?                                  |
| 340 | <a href="#">r7dvm2b</a>    | Enig/uenig: Tigging bør være forbudt i Norge, amerikanske føderale domstolen                                                 | diskret | numeric-12.0 | 4689    | 0       | Hvor enig eller uenig er du i at tigging bør være forbudt i Norge?                                  |
| 341 | <a href="#">r7dvm2c</a>    | Enig/uenig: Tigging bør være forbudt i Norge                                                                                 | diskret | numeric-12.0 | 4689    | 0       | Hvor enig eller uenig er du i at tigging bør være forbudt i Norge?                                  |
| 342 | <a href="#">r7ran12</a>    | [Randomiserer hvis u=2. ]                                                                                                    | diskret | numeric-12.0 | 1179    | 3510    | -                                                                                                   |
| 343 | <a href="#">r7dv13a</a>    | Ville skrevet under: Kampanje mot nedleggelse av lokal legevaktjeneste, 1% skrevet under, folk du kjenner/respekterer        | diskret | numeric-12.0 | 4689    | 0       | Ville du ha skrevet under?                                                                          |
| 344 | <a href="#">r7dv13b</a>    | Ville skrevet under: Kampanje mot nedleggelse av lokal legevaktjeneste, 1% skrevet under, folk du ikke er enig med politisk  | diskret | numeric-12.0 | 4689    | 0       | Ville du ha skrevet under?                                                                          |
| 345 | <a href="#">r7dv13c</a>    | Ville skrevet under: Kampanje mot nedleggelse av lokal legevaktjeneste, 10% skrevet under, folk du kjenner/respekterer       | diskret | numeric-12.0 | 4689    | 0       | Ville du ha skrevet under?                                                                          |
| 346 | <a href="#">r7dv13d</a>    | Ville skrevet under: Kampanje mot nedleggelse av lokal legevaktjeneste, 10% skrevet under, folk du ikke er enig med politisk | diskret | numeric-12.0 | 4689    | 0       | Ville du ha skrevet under?                                                                          |
| 347 | <a href="#">r7dv13e</a>    | Ville skrevet under: Kampanje mot nedleggelse av lokal legevaktjeneste, 30% skrevet under, folk du kjenner/respekterer       | diskret | numeric-12.0 | 4689    | 0       | Ville du ha skrevet under?                                                                          |
| 348 | <a href="#">r7dv13f</a>    | Ville skrevet under: Kampanje mot nedleggelse av lokal legevaktjeneste,                                                      | diskret | numeric-12.0 | 4689    | 0       | Ville du ha skrevet under?                                                                          |

| Fil Norsk medborgerpanel - runde 7 |                           |                                                                                                                         |         |              |         |         |                                                                                                                 |
|------------------------------------|---------------------------|-------------------------------------------------------------------------------------------------------------------------|---------|--------------|---------|---------|-----------------------------------------------------------------------------------------------------------------|
| #                                  | Navn                      | Merkelapp                                                                                                               | Type    | Format       | Gyldige | Ugyldig | Spørsmål                                                                                                        |
|                                    |                           | 30% skrevet under, folk du ikke er enig med politisk                                                                    |         |              |         |         |                                                                                                                 |
| 349                                | <a href="#">r7dv13g</a>   | Ville skrevet under: Kampanje mot nedleggelse av lokal legevaktjeneste, 1% skrevet under                                | diskret | numeric-12.0 | 4689    | 0       | Ville du ha skrevet under?                                                                                      |
| 350                                | <a href="#">r7dv13h</a>   | Ville skrevet under: Kampanje mot nedleggelse av lokal legevaktjeneste, 10% skrevet under                               | diskret | numeric-12.0 | 4689    | 0       | Ville du ha skrevet under?                                                                                      |
| 351                                | <a href="#">r7dv13i</a>   | Ville skrevet under: Kampanje mot nedleggelse av lokal legevaktjeneste, 30% skrevet under                               | diskret | numeric-12.0 | 4689    | 0       | Ville du ha skrevet under?                                                                                      |
| 352                                | <a href="#">r7dv13_2</a>  | Sannsynlighet for at en slik aksjon ville vinne frem                                                                    | diskret | numeric-12.0 | 4689    | 0       | Hvordan vurderer du sannsynligheten for at en slik aksjon ville vinne frem?                                     |
| 353                                | <a href="#">r7dv13_3</a>  | Har deltatt i en underskriftsaksjon på internett                                                                        | diskret | numeric-12.0 | 4689    | 0       | Har du noen ganger selv deltatt i en underskriftsaksjon på internett?                                           |
| 354                                | <a href="#">r7dv13_3b</a> | Hva handlet den siste aksjonen du deltok i om? [anonymisert]                                                            | diskret | character-52 | 4689    | 0       | Hva handlet den siste aksjonen du deltok i om?                                                                  |
| 355                                | <a href="#">r7dv13_3c</a> | Hva handlet aksjonen du deltok i om? [anonymisert]                                                                      | diskret | character-52 | 4689    | 0       | Hva handlet aksjonen du deltok i om?                                                                            |
| 356                                | <a href="#">r7ran6</a>    | [Randomiserer hvis u=2. ]                                                                                               | diskret | numeric-12.0 | 1178    | 3511    | -                                                                                                               |
| 357                                | <a href="#">r7mi5_1</a>   | Enig/uenig: Lærebøker i grunnskolen bør skrives, mer vekt på det nye kulturelle mangfoldet                              | diskret | numeric-12.0 | 4689    | 0       | Lærebøker i grunnskolen bør skrives slik at de legger mer vekt på det nye kulturelle mangfoldet i Norge.        |
| 358                                | <a href="#">r7mi5_2</a>   | Enig/uenig: Lærebøker i grunnskolen bør skrives slik at de reflekterer det nye kulturelle mangfoldet                    | diskret | numeric-12.0 | 4689    | 0       | Lærebøker i grunnskolen bør skrives slik at de reflekterer det nye kulturelle mangfoldet i Norge                |
| 359                                | <a href="#">r7mi5_3</a>   | Enig/uenig: Lærebøker i grunnskolen bør skrives slik at de legger mindre vekt på nye ideer om det kulturelle mangfoldet | diskret | numeric-12.0 | 4689    | 0       | Lærebøker i grunnskolen bør skrives slik at de legger mindre vekt på nye ideer om kulturelt mangfold i Norge    |
| 360                                | <a href="#">r7mi5_4</a>   | Enig/uenig: Lærebøker i grunnskolen bør omskrives, mer vekt på det nye kulturelle mangfoldet                            | diskret | numeric-12.0 | 4689    | 0       | Lærebøker i grunnskolen bør omskrives slik at de legger mer vekt på det nye kulturelle mangfoldet i Norge.      |
| 361                                | <a href="#">r7mi5_5</a>   | Enig/uenig: Lærebøker i grunnskolen bør omskrives slik at de reflekterer det nye kulturelle mangfoldet                  | diskret | numeric-12.0 | 4689    | 0       | Lærebøker i grunnskolen bør omskrives slik at de reflekterer det nye kulturelle mangfoldet i Norge.             |
| 362                                | <a href="#">r7mi5_6</a>   | Enig/uenig: Lærebøker i grunnskolen bør omskrives, mindre vekt på nye ideer om det kulturelle mangfoldet                | diskret | numeric-12.0 | 4689    | 0       | Lærebøker i grunnskolen bør omskrives slik at de legger mindre vekt på nye ideer om kulturelt mangfold i Norge. |
| 363                                | <a href="#">r7dvby1</a>   | Hvor trygt/utrygt oppleves ditt nærmiljø?                                                                               | diskret | numeric-12.0 | 4689    | 0       | Hvor trygt eller utrygt opplever du at det er?                                                                  |
| 364                                | <a href="#">r7dvby2</a>   | Er nærmiljøet blitt tryggere/mer utrygt/ingen endring de siste årene?                                                   | diskret | numeric-12.0 | 4689    | 0       | Vil du si at nærmiljøet ditt i de siste par årene har blitt tryggere, mer utrygt                                |

**Fil Norsk medborgerpanel - runde 7**

| #   | Navn                       | Merkelapp                                                                             | Type    | Format       | Gyldige | Ugyldig | Spørsmål                                                                                                 |
|-----|----------------------------|---------------------------------------------------------------------------------------|---------|--------------|---------|---------|----------------------------------------------------------------------------------------------------------|
|     |                            |                                                                                       |         |              |         |         | eller har det ikke vært noen endring i tryggheten?                                                       |
| 365 | <a href="#">r7dv5</a>      | Fordel/ulempe for Norge at innvandrere kommer for å bosette seg?                      | diskret | numeric-12.0 | 4689    | 0       | Hvor stor fordel eller ulempe vil du si at det er for Norge at innvandrere kommer for å bosette seg her? |
| 366 | <a href="#">r7dv6</a>      | Hvor viktig er innvandringspolitikk for deg?                                          | diskret | numeric-12.0 | 4689    | 0       | Hvor viktig er innvandringspolitikk for deg personlig?                                                   |
| 367 | <a href="#">r7dv7</a>      | Parti med best innvandringspolitikk                                                   | diskret | numeric-12.0 | 4689    | 0       | Hvilket parti synes du har den beste innvandringspolitikken?                                             |
| 368 | <a href="#">r7dv7_10..</a> | Parti med best innvandringspolitikk, andre [anonymisert]                              | diskret | character-50 | 4689    | 0       | Hvilket parti synes du har den beste innvandringspolitikken?                                             |
| 369 | <a href="#">r7ran7</a>     | [Randomiserer hvis u=4. ]                                                             | diskret | numeric-12.0 | 1192    | 3497    | -                                                                                                        |
| 370 | <a href="#">r7dvex1_1</a>  | Bør parti få forbud mot å stille til valg: Du er dypt uenig i alle saker              | diskret | numeric-12.0 | 4689    | 0       | Synes du at et slikt parti bør få forbud mot å stille til valg?                                          |
| 371 | <a href="#">r7dvex1_2</a>  | Bør parti få forbud mot å stille til valg: Fremmer udemokratiske verdier              | diskret | numeric-12.0 | 4689    | 0       | Synes du at et slikt parti bør få forbud mot å stille til valg?                                          |
| 372 | <a href="#">r7dvex1_3</a>  | Bør parti få forbud mot å stille til valg: Respekterer ikke demokratiske spilleregler | diskret | numeric-12.0 | 4689    | 0       | Synes du at et slikt parti bør få forbud mot å stille til valg?                                          |
| 373 | <a href="#">r7dvex1_4</a>  | Bør parti få forbud mot å stille til valg: Respekterer ikke norsk lov                 | diskret | numeric-12.0 | 4689    | 0       | Synes du at et slikt parti bør få forbud mot å stille til valg?                                          |
| 374 | <a href="#">r7dvex1_5</a>  | Bør parti få forbud mot å stille til valg: Brukt vold for å oppnå mål                 | diskret | numeric-12.0 | 4689    | 0       | Synes du at et slikt parti bør få forbud mot å stille til valg?                                          |
| 375 | <a href="#">r7dvex1_6</a>  | Bør parti få forbud mot å stille til valg: Ansvarlig for terrorangrep                 | diskret | numeric-12.0 | 4689    | 0       | Synes du at et slikt parti bør få forbud mot å stille til valg?                                          |
| 376 | <a href="#">r7dvby5</a>    | Hvor ofte ser du noen du antar/vet er asylsøker en vanlig uke                         | diskret | numeric-12.0 | 4689    | 0       | Hvor ofte ser du personer du antar eller vet er asylsøkere der du ferdes i løpet av en vanlig uke?       |
| 377 | <a href="#">r7dvby6</a>    | Mengde kontakt med asylsøkere                                                         | diskret | numeric-12.0 | 4689    | 0       | Vil du si at du har hatt...                                                                              |
| 378 | <a href="#">r7dvby7</a>    | Positiv/negativ opplevelse ved kontakt med asylsøkere                                 | diskret | numeric-12.0 | 4689    | 0       | Samlet sett, i hvilken grad har du opplevd den kontakten du har hatt som negativ eller positiv?          |
| 379 | <a href="#">r7dvby8</a>    | Har asylmottak i nærmiljø                                                             | diskret | numeric-12.0 | 4689    | 0       | Har du et asylmottak i ditt nærmiljø?                                                                    |
| 380 | <a href="#">r7dvby8aja</a> | Når ble asylmottaket etablert?                                                        | diskret | numeric-12.0 | 4689    | 0       | Kan du anslå når asylmottaket ble etablert?                                                              |
| 381 | <a href="#">r7dvby8bja</a> | Avstand mellom mottak og der du bor                                                   | diskret | numeric-12.0 | 4689    | 0       | Omtrent hvor langt er det til mottaket fra der du bor?                                                   |
| 382 | <a href="#">r7dvby8a..</a> | Har det vært et asylmottak i ditt nærmiljø før?                                       | diskret | numeric-12.0 | 4689    | 0       | Har det vært et asylmottak i ditt nærmiljø før?                                                          |
| 383 | <a href="#">r7dvby8a..</a> | Når ble asylmottaket lagt ned?                                                        | diskret | numeric-12.0 | 4689    | 0       | Kan du anslå når asylmottaket ble lagt ned?                                                              |
| 384 | <a href="#">r7dvby8a..</a> | Avstand mellom nedlagt mottak og der du bor                                           | diskret | numeric-12.0 | 4689    | 0       | Omtrent hvor langt var det til mottaket fra der du bor?                                                  |

| Fil Norsk medborgerpanel - runde 7 |                             |                                                                                              |         |              |         |         |                                                                                                                      |
|------------------------------------|-----------------------------|----------------------------------------------------------------------------------------------|---------|--------------|---------|---------|----------------------------------------------------------------------------------------------------------------------|
| #                                  | Navn                        | Merkelapp                                                                                    | Type    | Format       | Gyldige | Ugyldig | Spørsmål                                                                                                             |
| 385                                | <a href="#">r7dvby8a ..</a> | Stilling til å ha asylmottak i nærmiljø                                                      | diskret | numeric-12.0 | 4689    | 0       | Hvordan stiller du deg til å ha et asylmottak i ditt nærmiljø?                                                       |
| 386                                | <a href="#">r7dvby8a ..</a> | Stilling til å få asylmottak i nærmiljø                                                      | diskret | numeric-12.0 | 4689    | 0       | Hvordan stiller du deg til å få et asylmottak i ditt nærmiljø?                                                       |
| 387                                | <a href="#">r7dvby9_1</a>   | Erfaring ved å få mange asylsøkere den siste tiden:<br>Hilst på                              | diskret | numeric-12.0 | 4689    | 0       | Hilst på noen av asylsøkerne.                                                                                        |
| 388                                | <a href="#">r7dvby9_2</a>   | Erfaring ved å få mange asylsøkere den siste tiden:<br>Kontakt på internett                  | diskret | numeric-12.0 | 4689    | 0       | Hatt kontakt på internett med asylsøkere (f.eks. på Facebook eller Finn).                                            |
| 389                                | <a href="#">r7dvby9_3</a>   | Erfaring ved å få mange asylsøkere den siste tiden:<br>Blitt venn med noen                   | diskret | numeric-12.0 | 4689    | 0       | Blitt venn med noen av asylsøkerne.                                                                                  |
| 390                                | <a href="#">r7dvby9_4</a>   | Erfaring ved å få mange asylsøkere den siste tiden:<br>Fått hjelp av                         | diskret | numeric-12.0 | 4689    | 0       | Fått hjelp av en eller flere asylsøkere.                                                                             |
| 391                                | <a href="#">r7dvby9_5</a>   | Erfaring ved å få mange asylsøkere den siste tiden:<br>Blitt med i støttegruppe              | diskret | numeric-12.0 | 4689    | 0       | Blitt med i støttegruppe for asylsøkere (f.eks. på nett).                                                            |
| 392                                | <a href="#">r7dvby9_6</a>   | Erfaring ved å få mange asylsøkere den siste tiden:<br>Uttrykt skepsis                       | diskret | numeric-12.0 | 4689    | 0       | Uttrykt skepsis overfor asylsøkerne til andre.                                                                       |
| 393                                | <a href="#">r7dvby9_7</a>   | Erfaring ved å få mange asylsøkere den siste tiden:<br>Unngått så langt det lar seg gjøre    | diskret | numeric-12.0 | 4689    | 0       | Unngått asylsøkerne så langt det lar seg gjøre.                                                                      |
| 394                                | <a href="#">r7dvby9_..</a>  | Andre erfaringer<br>[anonymisert]                                                            | diskret | character-54 | 4689    | 0       | Vennligst skriv:                                                                                                     |
| 395                                | <a href="#">r7dvby10_1</a>  | Følelse om asylsøkere som gruppe: Beundring                                                  | diskret | numeric-12.0 | 4689    | 0       | Beundring                                                                                                            |
| 396                                | <a href="#">r7dvby10_2</a>  | Følelse om asylsøkere som gruppe: Medfølelse                                                 | diskret | numeric-12.0 | 4689    | 0       | Medfølelse                                                                                                           |
| 397                                | <a href="#">r7dvby10_3</a>  | Følelse om asylsøkere som gruppe: Angst                                                      | diskret | numeric-12.0 | 4689    | 0       | Angst                                                                                                                |
| 398                                | <a href="#">r7dvby10_4</a>  | Følelse om asylsøkere som gruppe: Frykt                                                      | diskret | numeric-12.0 | 4689    | 0       | Frykt                                                                                                                |
| 399                                | <a href="#">r7dvby11_1</a>  | I hvilken grad har du tenkt på hvordan det er å komme til Norge som asylsøker?               | diskret | numeric-12.0 | 4689    | 0       | I hvilken grad har du tenkt på og forestilt deg hvordan det føles å komme til Norge som asylsøker?                   |
| 400                                | <a href="#">r7padpil ..</a> | For/mot: EU-medlemskap                                                                       | diskret | numeric-12.0 | 4689    | 0       | Først: Er du for eller mot?                                                                                          |
| 401                                | <a href="#">r7padpil ..</a> | R7PADPILOT2_ran                                                                              | diskret | numeric-12.0 | 1082    | 3607    | -                                                                                                                    |
| 402                                | <a href="#">r7padpil ..</a> | Burde regjeringen følge resultat i folkeavstemning selv om flertall i Stortinget er uenig?   | diskret | numeric-12.0 | 4689    | 0       | I et sånt tilfelle, burde regjeringen følge resultatet i folkeavstemningen selv om flertallet i Stortinget er uenig? |
| 403                                | <a href="#">r7dv29_1</a>    | Utsagn: Tigging bør være forbudt                                                             | diskret | numeric-12.0 | 4689    | 0       | Tigging bør være forbudt i Norge.                                                                                    |
| 404                                | <a href="#">r7dv29_2</a>    | Utsagn: Norske muslimer mer lojale overfor muslimer i verden enn overfor folk i dette landet | diskret | numeric-12.0 | 4689    | 0       | Norske muslimer er mer lojale overfor andre muslimer i verden enn overfor folk i dette landet.                       |

**Fil Norsk medborgerpanel - runde 7**

| #   | Navn                      | Merkelapp                                                                                                         | Type    | Format       | Gyldige | Ugyldig | Spørsmål                                                                                                                                        |
|-----|---------------------------|-------------------------------------------------------------------------------------------------------------------|---------|--------------|---------|---------|-------------------------------------------------------------------------------------------------------------------------------------------------|
| 405 | <a href="#">r7dv29_3</a>  | Utsagn: Norge mister sin identitet hvis flere muslimer kommer for å bo her                                        | diskret | numeric-12.0 | 4689    | 0       | Norge kommer til å miste sin identitet hvis flere muslimer kommer for å bo her.                                                                 |
| 406 | <a href="#">r7dv39</a>    | Hvor ofte tenker/leser/ snakker du om noe som har med 22. juli å gjøre?                                           | diskret | numeric-12.0 | 4689    | 0       | Når det gjelder deg personlig, hvor ofte vil du si at du tenker på, leser eller snakker om noe som har med 22. juli nå for tiden?               |
| 407 | <a href="#">r7dvby3_1</a> | Grad av frykt for nytt terrorangrep i Norge                                                                       | diskret | numeric-12.0 | 4689    | 0       | I hvor stor grad er du redd for at vi skal oppleve et nytt terrorangrep i Norge?                                                                |
| 408 | <a href="#">r7dvby4</a>   | Terrorfaren blitt større/ mindre de siste årene                                                                   | diskret | numeric-12.0 | 4689    | 0       | Slik du opplever det, har terrorfaren i Norge blitt større eller mindre de siste par årene, eller har det ikke vært noen endring?               |
| 409 | <a href="#">r7pad9_1</a>  | Påstand: Kan som regel stole på riktige avgjørelser fra Høyesterett                                               | diskret | numeric-12.0 | 4689    | 0       | Vi kan som regel stole på at Norges Høyesterett tar riktige avgjørelser.                                                                        |
| 410 | <a href="#">r7pad9_2</a>  | Påstand: Høyesteretts makt i kontroversielle saker bør reduseres                                                  | diskret | numeric-12.0 | 4689    | 0       | Norges Høyesteretts makt til å avgjøre visse typer kontroversielle saker bør reduseres.                                                         |
| 411 | <a href="#">r7pad9_3</a>  | Påstand: Høyesterett favoriserer enkelte grupper                                                                  | diskret | numeric-12.0 | 4689    | 0       | Avgjørelsene til Norges Høyesterett favoriserer enkelte grupper mer enn andre.                                                                  |
| 412 | <a href="#">r7pad9_4</a>  | Påstand: Domstolen kan avskaffes, dersom Høyesterett tar mange valg folk flest er uenige i                        | diskret | numeric-12.0 | 4689    | 0       | Dersom Norges Høyesterett begynner å ta mange avgjørelser som folk flest er uenige i, kan det være like greit å avskaffe domstolen fullstendig. |
| 413 | <a href="#">r7ran31</a>   | [Randomiserer hvis u=3. ]                                                                                         | diskret | numeric-12.0 | 1080    | 3609    | -                                                                                                                                               |
| 414 | <a href="#">r7pad11a</a>  | Akseptabelt: Beslutning, innvandrerbarn til foreldre med ulovlig opphold få bli dersom foreldre sendt ut          | diskret | numeric-12.0 | 4689    | 0       | Generelt sett, i hvilken grad mener du dette ville ha vært en akseptabel avgjørelse fra Høyesterett?                                            |
| 415 | <a href="#">r7pad11b</a>  | Akseptabelt: Beslutning, innvandrerbarn til foreldre med ulovlig opphold ikke få bli dersom foreldre sendt ut     | diskret | numeric-12.0 | 4689    | 0       | Generelt sett, i hvilken grad mener du dette ville ha vært en akseptabel avgjørelse fra Høyesterett?                                            |
| 416 | <a href="#">r7pad11c</a>  | Akseptabelt: Enstemmig, innvandrerbarn til foreldre med ulovlig opphold få bli dersom foreldre sendt ut           | diskret | numeric-12.0 | 4689    | 0       | Generelt sett, i hvilken grad mener du dette ville ha vært en akseptabel avgjørelse fra Høyesterett?                                            |
| 417 | <a href="#">r7pad11d</a>  | Akseptabelt: Enstemmig, innvandrerbarn til foreldre med ulovlig opphold ikke få bli dersom foreldre sendt ut      | diskret | numeric-12.0 | 4689    | 0       | Generelt sett, i hvilken grad mener du dette ville ha vært en akseptabel avgjørelse fra Høyesterett?                                            |
| 418 | <a href="#">r7pad11e</a>  | Akseptabelt: Knapt flertall, innvandrerbarn til foreldre med ulovlig opphold få bli dersom foreldre sendt ut      | diskret | numeric-12.0 | 4689    | 0       | Generelt sett, i hvilken grad mener du dette ville ha vært en akseptabel avgjørelse fra Høyesterett?                                            |
| 419 | <a href="#">r7pad11f</a>  | Akseptabelt: Knapt flertall, innvandrerbarn til foreldre med ulovlig opphold ikke få bli dersom foreldre sendt ut | diskret | numeric-12.0 | 4689    | 0       | Generelt sett, i hvilken grad mener du dette ville ha vært en akseptabel avgjørelse fra Høyesterett?                                            |
| 420 | <a href="#">r7ran32</a>   | [Randomiserer hvis u=3. ]                                                                                         | diskret | numeric-12.0 | 1080    | 3609    | -                                                                                                                                               |
| 421 | <a href="#">r7pad12a</a>  | Akseptabelt: Beslutning, arbeidsgiver lov til å lese                                                              | diskret | numeric-12.0 | 4689    | 0       | Generelt sett, i hvilken grad mener du dette ville ha vært en akseptabel avgjørelse fra Høyesterett?                                            |



**Fil Norsk medborgerpanel - runde 7**

| #   | Navn                     | Merkelapp                                                                                                                  | Type    | Format       | Gyldige | Ugyldig | Spørsmål                                                                                                                      |
|-----|--------------------------|----------------------------------------------------------------------------------------------------------------------------|---------|--------------|---------|---------|-------------------------------------------------------------------------------------------------------------------------------|
|     |                          | meldinger på telefon utstedt av selskapet                                                                                  |         |              |         |         |                                                                                                                               |
| 422 | <a href="#">r7pad12b</a> | Akseptabelt: Beslutning, arbeidsgiver ikke lov til å lese meldinger på telefon utstedt av selskapet                        | diskret | numeric-12.0 | 4689    | 0       | Generelt sett, i hvilken grad mener du dette ville ha vært en akseptabel avgjørelse fra Høyesterett?                          |
| 423 | <a href="#">r7pad12c</a> | Akseptabelt: Enstemmig, arbeidsgiver lov til å lese meldinger på telefon utstedt av selskapet                              | diskret | numeric-12.0 | 4689    | 0       | Generelt sett, i hvilken grad mener du dette ville ha vært en akseptabel avgjørelse fra Høyesterett?                          |
| 424 | <a href="#">r7pad12d</a> | Akseptabelt: Enstemmig, arbeidsgiver ikke lov til å lese meldinger på telefon utstedt av selskapet                         | diskret | numeric-12.0 | 4689    | 0       | Generelt sett, i hvilken grad mener du dette ville ha vært en akseptabel avgjørelse fra Høyesterett?                          |
| 425 | <a href="#">r7pad12e</a> | Akseptabelt: Knapt flertall, arbeidsgiver lov til å lese meldinger på telefon utstedt av selskapet                         | diskret | numeric-12.0 | 4689    | 0       | Generelt sett, i hvilken grad mener du dette ville ha vært en akseptabel avgjørelse fra Høyesterett?                          |
| 426 | <a href="#">r7pad12f</a> | Akseptabelt: Knapt flertall, arbeidsgiver ikke lov til å lese meldinger på telefon utstedt av selskapet                    | diskret | numeric-12.0 | 4689    | 0       | Generelt sett, i hvilken grad mener du dette ville ha vært en akseptabel avgjørelse fra Høyesterett?                          |
| 427 | <a href="#">r7ran33</a>  | [Randomiserer hvis u=3. ]                                                                                                  | diskret | numeric-12.0 | 1080    | 3609    | -                                                                                                                             |
| 428 | <a href="#">r7pad13a</a> | Akseptabelt: Beslutning, nabokonflikter kan gå til domstol før mekling                                                     | diskret | numeric-12.0 | 4689    | 0       | Generelt sett, i hvilken grad mener du dette ville ha vært en akseptabel avgjørelse fra Høyesterett?                          |
| 429 | <a href="#">r7pad13b</a> | Akseptabelt: Beslutning, nabokonflikter kan ikke gå til domstol før mekling                                                | diskret | numeric-12.0 | 4689    | 0       | Generelt sett, i hvilken grad mener du dette ville ha vært en akseptabel avgjørelse fra Høyesterett?                          |
| 430 | <a href="#">r7pad13c</a> | Akseptabelt: Enstemmig, nabokonflikter kan gå til domstol før mekling                                                      | diskret | numeric-12.0 | 4689    | 0       | Generelt sett, i hvilken grad mener du dette ville ha vært en akseptabel avgjørelse fra Høyesterett?                          |
| 431 | <a href="#">r7pad13d</a> | Akseptabelt: Enstemmig, nabokonflikter kan ikke gå til domstol før mekling                                                 | diskret | numeric-12.0 | 4689    | 0       | Generelt sett, i hvilken grad mener du dette ville ha vært en akseptabel avgjørelse fra Høyesterett?                          |
| 432 | <a href="#">r7pad13e</a> | Akseptabelt: Knapt flertall, nabokonflikter kan gå til domstol før mekling                                                 | diskret | numeric-12.0 | 4689    | 0       | Generelt sett, i hvilken grad mener du dette ville ha vært en akseptabel avgjørelse fra Høyesterett?                          |
| 433 | <a href="#">r7pad13f</a> | Akseptabelt: Knapt flertall, nabokonflikter kan ikke gå til domstol før mekling                                            | diskret | numeric-12.0 | 4689    | 0       | Generelt sett, i hvilken grad mener du dette ville ha vært en akseptabel avgjørelse fra Høyesterett?                          |
| 434 | <a href="#">r7ran17</a>  | [Randomiserer hvis u=4. ]                                                                                                  | diskret | numeric-12.0 | 1184    | 3505    | -                                                                                                                             |
| 435 | <a href="#">r7pad1a</a>  | Enig/uenig: Myndighetene rett til å internere personer de tror kan være potensielle terrorister, foreslått i Storbritannia | diskret | numeric-12.0 | 4689    | 0       | Hvor enig eller uenig er du i at myndighetene skal få rett til å internere personer de tror kan være potensielle terrorister? |
| 436 | <a href="#">r7pad1b</a>  | Enig/uenig: Myndighetene rett til å internere personer de tror kan være potensielle terrorister, foreslått i Danmark       | diskret | numeric-12.0 | 4689    | 0       | Hvor enig eller uenig er du i at myndighetene skal få rett til å internere personer de tror kan være potensielle terrorister? |
| 437 | <a href="#">r7pad1c</a>  | Enig/uenig: Myndighetene rett til å internere personer de tror kan være potensielle                                        | diskret | numeric-12.0 | 4689    | 0       | Hvor enig eller uenig er du i at myndighetene skal få rett til å internere                                                    |



**Fil Norsk medborgerpanel - runde 7**

| #   | Navn                     | Merkelapp                                                                                                        | Type    | Format       | Gyldige | Ugyldig | Spørsmål                                                                                                                      |
|-----|--------------------------|------------------------------------------------------------------------------------------------------------------|---------|--------------|---------|---------|-------------------------------------------------------------------------------------------------------------------------------|
|     |                          | terrorister, foreslått i Tyskland                                                                                |         |              |         |         | personer de tror kan være potensielle terrorister?                                                                            |
| 438 | <a href="#">r7pad1d</a>  | Enig/uenig: Myndighetene rett til å internere personer de tror kan være potensielle terrorister, foreslått i USA | diskret | numeric-12.0 | 4689    | 0       | Hvor enig eller uenig er du i at myndighetene skal få rett til å internere personer de tror kan være potensielle terrorister? |
| 439 | <a href="#">r7pad1e</a>  | Enig/uenig: Myndighetene rett til å internere personer de tror kan være potensielle terrorister                  | diskret | numeric-12.0 | 4689    | 0       | Hvor enig eller uenig er du i at myndighetene skal få rett til å internere personer de tror kan være potensielle terrorister? |
| 440 | <a href="#">r7pad2_1</a> | Gjort det siste året for å endre samfunnet: Boikottet varer                                                      | diskret | numeric-12.0 | 4689    | 0       | Boikottet varer.                                                                                                              |
| 441 | <a href="#">r7pad2_2</a> | Gjort det siste året for å endre samfunnet: Kjøpt varer av etiske/moralske grunner                               | diskret | numeric-12.0 | 4689    | 0       | Kjøpt bestemte varer av etiske, miljømessige eller moralske grunner.                                                          |
| 442 | <a href="#">r7pad2_3</a> | Gjort det siste året for å endre samfunnet: Kjøpt fairtrade-produkt til tross for billigere alternativ           | diskret | numeric-12.0 | 4689    | 0       | Kjøpt fairtrade-produkter selv om det fantes andre, billigere alternativer.                                                   |
| 443 | <a href="#">r7pad2_4</a> | Gjort det siste året for å endre samfunnet: Kjøpt økologiske varer til tross for billigere alternativ            | diskret | numeric-12.0 | 4689    | 0       | Valgt økologiske varer selv om det fantes andre, billigere alternativer.                                                      |
| 444 | <a href="#">r7pad2_5</a> | Gjort det siste året for å endre samfunnet: Redusert/kuttet kjøttforbruk                                         | diskret | numeric-12.0 | 4689    | 0       | Redusert eller kuttet kjøttforbruket ditt.                                                                                    |
| 445 | <a href="#">r7pad2_6</a> | Gjort det siste året for å endre samfunnet: Kjøpt færre varer enn ellers                                         | diskret | numeric-12.0 | 4689    | 0       | Kjøpt færre varer enn du ellers ville.                                                                                        |
| 446 | <a href="#">r7pad2_7</a> | Gjort det siste året for å endre samfunnet: Heller kjøpt gjenbruksprodukter enn nytt                             | diskret | numeric-12.0 | 4689    | 0       | Handlet gjenbruksprodukter heller enn å kjøpe nytt.                                                                           |
| 447 | <a href="#">r7pad2_8</a> | Gjort det siste året for å endre samfunnet: Deltatt i protestaksjoner mot varemerker/forretninger                | diskret | numeric-12.0 | 4689    | 0       | Deltatt i aksjoner i protest mot bestemte varemerker eller forretninger.                                                      |
| 448 | <a href="#">r7pad2_9</a> | Gjort det siste året for å endre samfunnet: Investert i selskap med sosial profil du støtter                     | diskret | numeric-12.0 | 4689    | 0       | Investert i selskaper som har en sosial profil som du støtter.                                                                |
| 449 | <a href="#">r7pad3_1</a> | Påstand: Politikere ikke i stand til å gjøre noe med samfunnsproblemer, hver enkelt må gjøre sitt                | diskret | numeric-12.0 | 4689    | 0       | Siden politikerne ikke er i stand til å gjøre noe med samfunnsproblemene, må hver enkelt gjøre sitt.                          |
| 450 | <a href="#">r7pad3_2</a> | Påstand: Politikernes ansvar at vi lever i bærekraftig samfunn                                                   | diskret | numeric-12.0 | 4689    | 0       | Det er politikerne og ikke enkeltindividers ansvar at samfunnet vi lever i er bærekraftig.                                    |
| 451 | <a href="#">r7pad3_3</a> | Påstand: Hver enkelts valg kan endre samfunnsutviklingen                                                         | diskret | numeric-12.0 | 4689    | 0       | Ved at hver enkelt tar bevisste valg i hverdagen, er det mulig å endre samfunnsutviklingen.                                   |
| 452 | <a href="#">r7pad3_4</a> | Påstand: Naivt å tro at globale samfunnsproblemer kan løses av enkeltindividers livsstilsvalg                    | diskret | numeric-12.0 | 4689    | 0       | Det er naivt å tro at store, globale samfunnsutfordringer kan løses gjennom enkeltindividers livsstilsvalg.                   |
| 453 | <a href="#">r7ran8</a>   | [Randomiserer hvis u=4. ]                                                                                        | diskret | numeric-12.0 | 1176    | 3513    | -                                                                                                                             |

**Fil Norsk medborgerpanel - runde 7**

| #   | Navn                      | Merkelapp                                                                                            | Type    | Format       | Gyldige | Ugyldig | Spørsmål                                                                                                                                                         |
|-----|---------------------------|------------------------------------------------------------------------------------------------------|---------|--------------|---------|---------|------------------------------------------------------------------------------------------------------------------------------------------------------------------|
| 454 | <a href="#">r7dvex2_1</a> | Bør parti forbys: Avskaffe all oljeproduksjon                                                        | diskret | numeric-12.0 | 4689    | 0       | Slik du ser det, bør et slikt parti forbys?                                                                                                                      |
| 455 | <a href="#">r7dvex2_2</a> | Bør parti forbys: Avskaffe frie, rettferdige valg                                                    | diskret | numeric-12.0 | 4689    | 0       | Slik du ser det, bør et slikt parti forbys?                                                                                                                      |
| 456 | <a href="#">r7dvex2_3</a> | Bør parti forbys: Avskaffe pressefriheten                                                            | diskret | numeric-12.0 | 4689    | 0       | Slik du ser det, bør et slikt parti forbys?                                                                                                                      |
| 457 | <a href="#">r7dvex2_4</a> | Bør parti forbys: Avskaffe tilslutning til Menneskerettighetskonvensjon                              | diskret | numeric-12.0 | 4689    | 0       | Slik du ser det, bør et slikt parti forbys?                                                                                                                      |
| 458 | <a href="#">r7dvex2_5</a> | Bør parti forbys: Avskaffe minoriteters rettigheter                                                  | diskret | numeric-12.0 | 4689    | 0       | Slik du ser det, bør et slikt parti forbys?                                                                                                                      |
| 459 | <a href="#">r7ran9</a>    | [Randomiserer hvis u=4. ]                                                                            | diskret | numeric-12.0 | 1176    | 3513    | -                                                                                                                                                                |
| 460 | <a href="#">r7dvg_1</a>   | Påstand: Trolig at de som oppgir legning som grunn for å søke asyl snakker sant                      | diskret | numeric-12.0 | 4689    | 0       | Det er grunn til å tro at de fleste snakker sant når de oppgir seksuell orientering (legning) som årsak til at de har forlatt hjemlandet og søker asyl i Norge.  |
| 461 | <a href="#">r7dvg_2</a>   | Påstand: Trolig at asylsøkers årsak til å søke asyl er sann                                          | diskret | numeric-12.0 | 4689    | 0       | Det er grunn til å tro at de fleste snakker sant om årsaken til at de har forlatt hjemlandet og søker asyl i Norge.                                              |
| 462 | <a href="#">r7dvg_3</a>   | Påstand: Trolig at de som oppgir konvertering til ny religion som grunn for å søke asyl snakker sant | diskret | numeric-12.0 | 4689    | 0       | Det er grunn til å tro at de fleste snakker sant når de oppgir konvertering til en ny religion som årsak til at de har forlatt hjemlandet og søker asyl i Norge. |
| 463 | <a href="#">r7dvg_4</a>   | Påstand: Trolig at asylsøker snakker sant når de oppgir at de er mindreårige                         | diskret | numeric-12.0 | 4689    | 0       | Det er grunn til å tro at de fleste snakker sant når de oppgir at de er mindreårige når de søker asyl i Norge.                                                   |
| 464 | <a href="#">r7ran10</a>   | [Randomiserer hvis u=4. ]                                                                            | diskret | numeric-12.0 | 1175    | 3514    | -                                                                                                                                                                |
| 465 | <a href="#">r7dvkost1</a> | Innvandring hvor stor kostnad/gevinst for velferdsstaten?                                            | diskret | numeric-12.0 | 4689    | 0       | Hvor stor kostnad eller gevinst vil du si at innvandring er for den norske velferdsstaten?                                                                       |
| 466 | <a href="#">r7dvkost2</a> | Innvandring hvor stor kostnad/gevinst for velferdsstaten? Arbeidsledighet 7%                         | diskret | numeric-12.0 | 4689    | 0       | Hvis du tar dette i betraktning, hvor stor kostnad eller gevinst vil du si at innvandring er for den norske velferdsstaten?                                      |
| 467 | <a href="#">r7dvkost3</a> | Innvandring hvor stor kostnad/gevinst for velferdsstaten? Sysselsetting 60%                          | diskret | numeric-12.0 | 4689    | 0       | Hvis du tar det i betraktning, hvor stor kostnad eller gevinst vil du si at innvandring er for den norske velferdsstaten?                                        |
| 468 | <a href="#">r7dvkost4</a> | Innvandring hvor stor kostnad/gevinst for velferdsstaten? Utgift                                     | diskret | numeric-12.0 | 4689    | 0       | Hvis du tar det i betraktning, hvor stor kostnad eller gevinst vil du si at innvandring er for den norske velferdsstaten?                                        |
| 469 | <a href="#">r7dvkost5</a> | Innvandring hvor stor kostnad/gevinst for velferdsstaten? Inntekt                                    | diskret | numeric-12.0 | 4689    | 0       | Hvis du tar det i betraktning, hvor stor kostnad eller gevinst vil du si at innvandring er for den norske velferdsstaten?                                        |
| 470 | <a href="#">r7dvkost6</a> | Innvandring hvor stor kostnad/gevinst for velferdsstaten? Arbeidsledighet 7%, utgift                 | diskret | numeric-12.0 | 4689    | 0       | Hvis du tar det i betraktning, hvor stor kostnad eller gevinst vil du si at innvandring er for den norske velferdsstaten?                                        |
| 471 | <a href="#">r7dvkost7</a> | Innvandring hvor stor kostnad/gevinst for velferdsstaten? Sysselsetting 60%, inntekt                 | diskret | numeric-12.0 | 4689    | 0       | Hvis du tar det i betraktning, hvor stor kostnad eller gevinst vil du si at innvandring er for den norske velferdsstaten?                                        |

**Fil Norsk medborgerpanel - runde 7**

| #   | Navn                        | Merkelapp                                                                          | Type    | Format       | Gyldige | Ugyldig | Spørsmål                                                                                                       |
|-----|-----------------------------|------------------------------------------------------------------------------------|---------|--------------|---------|---------|----------------------------------------------------------------------------------------------------------------|
| 472 | <a href="#">r7dvin</a>      | Hvor mild/streng innvandringspolitikk bør Norge ha?                                | diskret | numeric-12.0 | 4689    | 0       | Hvor mild eller streng innvandringspolitikk synes du Norge bør ha?                                             |
| 473 | <a href="#">r7nfc_1</a>     | Utsagn: Foretrekker kompliserte fremfor lette oppgaver                             | diskret | numeric-12.0 | 4689    | 0       | Jeg foretrekker kompliserte fremfor lette oppgaver.                                                            |
| 474 | <a href="#">r7nfc_2</a>     | Utsagn: Liker oppgaver som krever nye løsninger                                    | diskret | numeric-12.0 | 4689    | 0       | Jeg liker svært godt oppgaver som går ut på at man må komme opp med nye løsninger.                             |
| 475 | <a href="#">r7nfc_3</a>     | Utsagn: Ville foretrukket intellektuell oppgave fremfor en som krever lite tenking | diskret | numeric-12.0 | 4689    | 0       | Jeg ville foretrukket en oppgave som er intellektuell og innviklet fremfor en oppgave som krever lite tenking. |
| 476 | <a href="#">r7nte_1</a>     | Utsagn: Mening om det aller meste                                                  | diskret | numeric-12.0 | 4689    | 0       | Jeg har en mening om det aller meste.                                                                          |
| 477 | <a href="#">r7nte_2</a>     | Utsagn: Viktig å mene om noe er rett/galt                                          | diskret | numeric-12.0 | 4689    | 0       | Jeg synes det er viktig å mene om noe er rett eller galt.                                                      |
| 478 | <a href="#">r7k13</a>       | Hvor ofte diskuterer du politikk med andre?                                        | diskret | numeric-12.0 | 4689    | 0       | Hvor ofte vil du si at du diskuterer politikk med andre?                                                       |
| 479 | <a href="#">r7k33</a>       | Hva stemmer best med det du har gjort siste uken?                                  | diskret | numeric-12.0 | 4689    | 0       | Hvilken av beskrivelsene under passer best på det du har gjort de siste 7 dagene?                              |
| 480 | <a href="#">r7k33_9_...</a> | Hva stemmer best med det du har gjort siste uken? Annet [anonymisert]              | diskret | character-48 | 4689    | 0       | Hvilken av beskrivelsene under passer best på det du har gjort de siste 7 dagene?                              |
| 481 | <a href="#">r7k34_1</a>     | Hvilken bransje jobber du innenfor: Offentlig sentralforvaltning                   | diskret | numeric-12.0 | 4689    | 0       | Hvilken bransje arbeider du (din bedrift) innenfor?                                                            |
| 482 | <a href="#">r7k34_2</a>     | Hvilken bransje jobber du innenfor: Barnehage/skole/undervisning                   | diskret | numeric-12.0 | 4689    | 0       | Hvilken bransje arbeider du (din bedrift) innenfor?                                                            |
| 483 | <a href="#">r7k34_3</a>     | Hvilken bransje jobber du innenfor: Helsetjenester                                 | diskret | numeric-12.0 | 4689    | 0       | Hvilken bransje arbeider du (din bedrift) innenfor?                                                            |
| 484 | <a href="#">r7k34_4</a>     | Hvilken bransje jobber du innenfor: Sosialtjenester/barnevern                      | diskret | numeric-12.0 | 4689    | 0       | Hvilken bransje arbeider du (din bedrift) innenfor?                                                            |
| 485 | <a href="#">r7k34_5</a>     | Hvilken bransje jobber du innenfor: Pleie- og omsorgstjenester                     | diskret | numeric-12.0 | 4689    | 0       | Hvilken bransje arbeider du (din bedrift) innenfor?                                                            |
| 486 | <a href="#">r7k34_6</a>     | Hvilken bransje jobber du innenfor: Forsvar/politi/rettsvesen/vakthold             | diskret | numeric-12.0 | 4689    | 0       | Hvilken bransje arbeider du (din bedrift) innenfor?                                                            |
| 487 | <a href="#">r7k34_7</a>     | Hvilken bransje jobber du innenfor: Landbruk/skogbruk/fiske                        | diskret | numeric-12.0 | 4689    | 0       | Hvilken bransje arbeider du (din bedrift) innenfor?                                                            |
| 488 | <a href="#">r7k34_8</a>     | Hvilken bransje jobber du innenfor: Industri/Teknikk                               | diskret | numeric-12.0 | 4689    | 0       | Hvilken bransje arbeider du (din bedrift) innenfor?                                                            |
| 489 | <a href="#">r7k34_9</a>     | Hvilken bransje jobber du innenfor: Bygg/anlegg                                    | diskret | numeric-12.0 | 4689    | 0       | Hvilken bransje arbeider du (din bedrift) innenfor?                                                            |
| 490 | <a href="#">r7k34_10</a>    | Hvilken bransje jobber du innenfor: Varehandel/butikk                              | diskret | numeric-12.0 | 4689    | 0       | Hvilken bransje arbeider du (din bedrift) innenfor?                                                            |
| 491 | <a href="#">r7k34_11</a>    | Hvilken bransje jobber du innenfor: Transport/samferdsel                           | diskret | numeric-12.0 | 4689    | 0       | Hvilken bransje arbeider du (din bedrift) innenfor?                                                            |

**Fil Norsk medborgerpanel - runde 7**

| #   | Navn                       | Merkelapp                                                                                                       | Type    | Format       | Gyldige | Ugyldig | Spørsmål                                                                                                                                      |
|-----|----------------------------|-----------------------------------------------------------------------------------------------------------------|---------|--------------|---------|---------|-----------------------------------------------------------------------------------------------------------------------------------------------|
| 492 | <a href="#">r7k34_12</a>   | Hvilken bransje jobber du innenfor: Kultur/idrett/organisasjoner                                                | diskret | numeric-12.0 | 4689    | 0       | Hvilken bransje arbeider du (din bedrift) innenfor?                                                                                           |
| 493 | <a href="#">r7k34_13</a>   | Hvilken bransje jobber du innenfor: Media/reklame/PR/informasjon                                                | diskret | numeric-12.0 | 4689    | 0       | Hvilken bransje arbeider du (din bedrift) innenfor?                                                                                           |
| 494 | <a href="#">r7k34_14</a>   | Hvilken bransje jobber du innenfor: Forskning/analyse                                                           | diskret | numeric-12.0 | 4689    | 0       | Hvilken bransje arbeider du (din bedrift) innenfor?                                                                                           |
| 495 | <a href="#">r7k34_15</a>   | Hvilken bransje jobber du innenfor: Reiseliv/hotell                                                             | diskret | numeric-12.0 | 4689    | 0       | Hvilken bransje arbeider du (din bedrift) innenfor?                                                                                           |
| 496 | <a href="#">r7k34_16</a>   | Hvilken bransje jobber du innenfor: Restaurant/servering                                                        | diskret | numeric-12.0 | 4689    | 0       | Hvilken bransje arbeider du (din bedrift) innenfor?                                                                                           |
| 497 | <a href="#">r7k34_17</a>   | Hvilken bransje jobber du innenfor: Telekommunikasjon/IT                                                        | diskret | numeric-12.0 | 4689    | 0       | Hvilken bransje arbeider du (din bedrift) innenfor?                                                                                           |
| 498 | <a href="#">r7k34_18</a>   | Hvilken bransje jobber du innenfor: Bank/forsikring/finans                                                      | diskret | numeric-12.0 | 4689    | 0       | Hvilken bransje arbeider du (din bedrift) innenfor?                                                                                           |
| 499 | <a href="#">r7k34_19</a>   | Hvilken bransje jobber du innenfor: Forretningsmessig service-/tjenesteyting                                    | diskret | numeric-12.0 | 4689    | 0       | Hvilken bransje arbeider du (din bedrift) innenfor?                                                                                           |
| 500 | <a href="#">r7k34_20</a>   | Hvilken bransje jobber du innenfor: Olje/gass                                                                   | diskret | numeric-12.0 | 4689    | 0       | Hvilken bransje arbeider du (din bedrift) innenfor?                                                                                           |
| 501 | <a href="#">r7k34_21</a>   | Hvilken bransje jobber du innenfor: Annet                                                                       | diskret | numeric-12.0 | 4689    | 0       | Hvilken bransje arbeider du (din bedrift) innenfor?                                                                                           |
| 502 | <a href="#">r7k34_21..</a> | Hvilken bransje jobber du innenfor: Annet [anonymisert]                                                         | diskret | character-51 | 4689    | 0       | Hvilken bransje arbeider du (din bedrift) innenfor?                                                                                           |
| 503 | <a href="#">r7k35</a>      | Hvilken beskrivelse passer best på området du bor i?                                                            | diskret | numeric-12.0 | 4689    | 0       | Hvilken beskrivelse passer best på området du bor i?                                                                                          |
| 504 | <a href="#">r7ran24</a>    | [Alle respondenter randomisert. ]                                                                               | diskret | numeric-12.0 | 4581    | 108     | -                                                                                                                                             |
| 505 | <a href="#">r7ran24_1</a>  | [Randomiserer hvis ran24=1. ]                                                                                   | diskret | numeric-12.0 | 789     | 3900    | -                                                                                                                                             |
| 506 | <a href="#">ocr7matc1</a>  | Enig i hvor mange av tre påstander: Øke bistand, senke skatt på drivstoff, tillate store selskapers forurensing | diskret | numeric-12.0 | 4689    | 0       | Norge bør øke bistanden til de fattige. Norge bør senke skatten på bensin og diesel. Norge bør tillate at store selskaper forurenser miljøet. |
| 507 | <a href="#">ocr7matc1a</a> | Bør Norge la folk fra muslimske land komme og bosette seg?                                                      | diskret | numeric-12.0 | 4689    | 0       | Synes du Norge bør la folk fra muslimske land komme for å bosette seg her?                                                                    |
| 508 | <a href="#">ocr7matc2</a>  | Enig i hvor mange av tre påstander: Øke bistand, senke skatt på drivstoff, tillate store selskapers forurensing | diskret | numeric-12.0 | 4689    | 0       | Norge bør øke bistanden til de fattige. Norge bør senke skatten på bensin og diesel. Norge bør tillate at store selskaper forurenser miljøet. |
| 509 | <a href="#">ocr7matc2a</a> | Bør Norge la folk fra østeuropeiske land komme og bosette seg?                                                  | diskret | numeric-12.0 | 4689    | 0       | Synes du Norge bør la folk fra østeuropeiske land komme for å bosette seg her?                                                                |
| 510 | <a href="#">ocr7matc3</a>  | Enig i hvor mange av tre påstander: Øke bistand, senke skatt på drivstoff, tillate store selskapers forurensing | diskret | numeric-12.0 | 4689    | 0       | Norge bør øke bistanden til de fattige. Norge bør senke skatten på bensin og diesel. Norge bør tillate at store selskaper forurenser miljøet. |

**Fil Norsk medborgerpanel - runde 7**

| #   | Navn                       | Merkelapp                                                                                                                                                | Type    | Format       | Gyldige | Ugyldig | Spørsmål                                                                                                                                                                                                               |
|-----|----------------------------|----------------------------------------------------------------------------------------------------------------------------------------------------------|---------|--------------|---------|---------|------------------------------------------------------------------------------------------------------------------------------------------------------------------------------------------------------------------------|
| 511 | <a href="#">ocr7matc3a</a> | Bør Norge la immigranter fra muslimske land komme og bosette seg?                                                                                        | diskret | numeric-12.0 | 4689    | 0       | Synes du Norge bør la immigranter fra muslimske land komme for å bosette seg her?                                                                                                                                      |
| 512 | <a href="#">ocr7matc4</a>  | Enig i hvor mange av tre påstander: Øke bistand, senke skatt på drivstoff, tillate store selskapers forurensing                                          | diskret | numeric-12.0 | 4689    | 0       | Norge bør øke bistanden til de fattige. Norge bør senke skatten på bensin og diesel. Norge bør tillate at store selskaper forurensar miljøet.                                                                          |
| 513 | <a href="#">ocr7matc4a</a> | Bør Norge la flyktninger fra muslimske land komme og bosette seg?                                                                                        | diskret | numeric-12.0 | 4689    | 0       | Synes du Norge bør la flyktninger fra muslimske land komme for å bosette seg her?                                                                                                                                      |
| 514 | <a href="#">ocr7matt1</a>  | Enig i hvor mange av fire påstander: Øke bistand, senke skatt på drivstoff, tillate store selskapers forurensing, folk fra muslimske land bosette        | diskret | numeric-12.0 | 4689    | 0       | Norge bør øke bistanden til de fattige. Norge bør senke skatten på bensin og diesel. Norge bør tillate at store selskaper forurensar miljøet. Norge bør la folk fra muslimske land komme for å bosette seg her.        |
| 515 | <a href="#">ocr7matt2</a>  | Enig i hvor mange av fire påstander: Øke bistand, senke skatt på drivstoff, tillate store selskapers forurensing, folk fra østeuropeiske land bosette    | diskret | numeric-12.0 | 4689    | 0       | Norge bør øke bistanden til de fattige. Norge bør senke skatten på bensin og diesel. Norge bør tillate at store selskaper forurensar miljøet. Norge bør la folk fra østeuropeiske land komme for å bosette seg her.    |
| 516 | <a href="#">ocr7matt3</a>  | Enig i hvor mange av fire påstander: Øke bistand, senke skatt på drivstoff, tillate store selskapers forurensing, immigranter fra muslimske land bosette | diskret | numeric-12.0 | 4689    | 0       | Norge bør øke bistanden til de fattige. Norge bør senke skatten på bensin og diesel. Norge bør tillate at store selskaper forurensar miljøet. Norge bør la immigranter fra muslimske land komme for å bosette seg her. |
| 517 | <a href="#">ocr7matt4</a>  | Enig i hvor mange av fire påstander: Øke bistand, senke skatt på drivstoff, tillate store selskapers forurensing, flyktninger fra muslimske land bosette | diskret | numeric-12.0 | 4689    | 0       | Norge bør øke bistanden til de fattige. Norge bør senke skatten på bensin og diesel. Norge bør tillate at store selskaper forurensar miljøet. Norge bør la flyktninger fra muslimske land komme for å bosette seg her. |
| 518 | <a href="#">r7ran25</a>    | [Alle respondenter randomisert. ]                                                                                                                        | diskret | numeric-12.0 | 1078    | 3611    | -                                                                                                                                                                                                                      |
| 519 | <a href="#">r7ran26</a>    | [Alle respondenter randomisert. ]                                                                                                                        | diskret | numeric-12.0 | 1078    | 3611    | -                                                                                                                                                                                                                      |
| 520 | <a href="#">r7ran27</a>    | [Alle respondenter randomisert. ]                                                                                                                        | diskret | numeric-12.0 | 1078    | 3611    | -                                                                                                                                                                                                                      |
| 521 | <a href="#">r7ran28</a>    | [Alle respondenter randomisert. ]                                                                                                                        | diskret | numeric-12.0 | 1078    | 3611    | -                                                                                                                                                                                                                      |
| 522 | <a href="#">r7ran29</a>    | [Alle respondenter randomisert. ]                                                                                                                        | diskret | numeric-12.0 | 1078    | 3611    | -                                                                                                                                                                                                                      |
| 523 | <a href="#">r7ran30</a>    | [Alle respondenter randomisert. ]                                                                                                                        | diskret | numeric-12.0 | 1078    | 3611    | -                                                                                                                                                                                                                      |
| 524 | <a href="#">ocr7mari..</a> | Riktig å etterforske Gazprom                                                                                                                             | diskret | numeric-12.0 | 4689    | 0       | Mener du at denne etterforskningen av den russiske energigiganten Gazprom er riktig?                                                                                                                                   |
| 525 | <a href="#">ocr7mari..</a> | Riktig å etterforske Gazprom: Satt konsernet under press                                                                                                 | diskret | numeric-12.0 | 4689    | 0       | Mener du at denne etterforskningen av den russiske energigiganten Gazprom er riktig?                                                                                                                                   |
| 526 | <a href="#">ocr7mari..</a> | Riktig å etterforske Gazprom: Satt konsernet                                                                                                             | diskret | numeric-12.0 | 4689    | 0       | Mener du at denne etterforskningen av den russiske energigiganten Gazprom er riktig?                                                                                                                                   |

**Fil Norsk medborgerpanel - runde 7**

| #   | Navn                       | Merkelapp                                                                                                                                                                                                | Type    | Format       | Gyldige | Ugyldig | Spørsmål                                                                                   |
|-----|----------------------------|----------------------------------------------------------------------------------------------------------------------------------------------------------------------------------------------------------|---------|--------------|---------|---------|--------------------------------------------------------------------------------------------|
|     |                            | under press ifølge Gazprom/<br>russiske medier                                                                                                                                                           |         |              |         |         |                                                                                            |
| 527 | <a href="#">ocr7mari..</a> | Riktig å etterforske<br>Gazprom: Urettferdige priser<br>i Øst-Europa                                                                                                                                     | diskret | numeric-12.0 | 4689    | 0       | Mener du at denne etterforskningen av<br>den russiske energigiganten Gazprom er<br>riktig? |
| 528 | <a href="#">ocr7mari..</a> | Riktig å etterforske<br>Gazprom: Urettferdige<br>priser i Øst-Europa ifølge<br>antitrustmyndigheter                                                                                                      | diskret | numeric-12.0 | 4689    | 0       | Mener du at denne etterforskningen av<br>den russiske energigiganten Gazprom er<br>riktig? |
| 529 | <a href="#">ocr7mari..</a> | Vurdering økt militært<br>nærvær Øst-Europa                                                                                                                                                              | diskret | numeric-12.0 | 4689    | 0       | Hvordan vurderer du det økte militære<br>nærværet i Øst-Europa?                            |
| 530 | <a href="#">ocr7mari..</a> | Vurdering økt militært<br>nærvær Øst-Europa: Kan<br>eskalere små hendelser                                                                                                                               | diskret | numeric-12.0 | 4689    | 0       | Hvordan vurderer du det økte militære<br>nærværet i Øst-Europa?                            |
| 531 | <a href="#">ocr7mari..</a> | Vurdering økt militært<br>nærvær Øst-Europa: Kan<br>eskalere små hendelser i<br>følge russiske eksperter                                                                                                 | diskret | numeric-12.0 | 4689    | 0       | Hvordan vurderer du det økte militære<br>nærværet i Øst-Europa?                            |
| 532 | <a href="#">ocr7mari..</a> | Vurdering økt militært<br>nærvær Øst-Europa:<br>Utformet som støtte til<br>NATOs allierte                                                                                                                | diskret | numeric-12.0 | 4689    | 0       | Hvordan vurderer du det økte militære<br>nærværet i Øst-Europa?                            |
| 533 | <a href="#">ocr7mari..</a> | Vurdering økt militært<br>nærvær Øst-Europa:<br>Utformet som støtte til<br>NATOs allierte, påpekt av<br>USAs utenriksdepartement                                                                         | diskret | numeric-12.0 | 4689    | 0       | Hvordan vurderer du det økte militære<br>nærværet i Øst-Europa?                            |
| 534 | <a href="#">ocr7mari..</a> | Vurdering protestene som<br>førte til Yanukovychs avgang                                                                                                                                                 | diskret | numeric-12.0 | 4689    | 0       | Hvordan vil du vurdere protestene som<br>førte til president Yanukovychs avgang?           |
| 535 | <a href="#">ocr7mari..</a> | Vurdering protestene som<br>førte til Yanukovychs<br>avgang: Kupp for å fremme<br>Vestens innflytelse                                                                                                    | diskret | numeric-12.0 | 4689    | 0       | Hvordan vil du vurdere protestene som<br>førte til president Yanukovychs avgang?           |
| 536 | <a href="#">ocr7mari..</a> | Vurdering protestene som<br>førte til Yanukovychs<br>avgang: Kupp for å fremme<br>Vestens innflytelse ifølge<br>russisk lederskap                                                                        | diskret | numeric-12.0 | 4689    | 0       | Hvordan vil du vurdere protestene som<br>førte til president Yanukovychs avgang?           |
| 537 | <a href="#">ocr7mari..</a> | Vurdering protestene som<br>førte til Yanukovychs<br>avgang: Gjennomført av det<br>ukrainske folk, førte til frie<br>valg og åpnet et europeisk<br>perspektiv                                            | diskret | numeric-12.0 | 4689    | 0       | Hvordan vil du vurdere protestene som<br>førte til president Yanukovychs avgang?           |
| 538 | <a href="#">ocr7mari..</a> | Vurdering protestene som<br>førte til Yanukovychs<br>avgang: Gjennomført av det<br>ukrainske folk, førte til frie<br>valg og åpnet et europeisk<br>perspektiv, bemerket av<br>norske/vestlige politikere | diskret | numeric-12.0 | 4689    | 0       | Hvordan vil du vurdere protestene som<br>førte til president Yanukovychs avgang?           |
| 539 | <a href="#">ocr7mari..</a> | Troverdighetsgrad NATOs<br>forpliktelse i å bistå Tyrkia                                                                                                                                                 | diskret | numeric-12.0 | 4689    | 0       | Hvor troverdig mener du NATOs<br>forpliktelse til å bistå Tyrkia er?                       |
| 540 | <a href="#">ocr7mari..</a> | Troverdighetsgrad NATOs<br>forpliktelse i å bistå Tyrkia:                                                                                                                                                | diskret | numeric-12.0 | 4689    | 0       | Hvor troverdig mener du NATOs<br>forpliktelse til å bistå Tyrkia er?                       |

**Fil Norsk medborgerpanel - runde 7**

| #   | Navn                       | Merkelapp                                                                                                                                                            | Type    | Format       | Gyldige | Ugyldig | Spørsmål                                                                                                                   |
|-----|----------------------------|----------------------------------------------------------------------------------------------------------------------------------------------------------------------|---------|--------------|---------|---------|----------------------------------------------------------------------------------------------------------------------------|
|     |                            | NATO kan nøle grunnet<br>Erdogans politikk                                                                                                                           |         |              |         |         |                                                                                                                            |
| 541 | <a href="#">ocr7mari..</a> | Troverdighetsgrad NATOs<br>forpliktelse i å bistå Tyrkia:<br>NATO kan nøle grunnet<br>Erdogang ifølge russisk<br>regjering                                           | diskret | numeric-12.0 | 4689    | 0       | Hvor troverdig mener du NATOs<br>forpliktelse til å bistå Tyrkia er?                                                       |
| 542 | <a href="#">ocr7mari..</a> | Troverdighetsgrad NATOs<br>forpliktelse i å bistå Tyrkia:<br>Alliansen aldri nektet støtte                                                                           | diskret | numeric-12.0 | 4689    | 0       | Hvor troverdig mener du NATOs<br>forpliktelse til å bistå Tyrkia er?                                                       |
| 543 | <a href="#">ocr7mari..</a> | Troverdighetsgrad NATOs<br>forpliktelse i å bistå Tyrkia:<br>Alliansen aldri nektet støtte<br>påpeker NATO-tjenestemenn                                              | diskret | numeric-12.0 | 4689    | 0       | Hvor troverdig mener du NATOs<br>forpliktelse til å bistå Tyrkia er?                                                       |
| 544 | <a href="#">ocr7mari..</a> | Hvor ofte selvsensurerer<br>mediene i Norge for ikke å<br>sette migranter i dårlig lys                                                                               | diskret | numeric-12.0 | 4689    | 0       | Hvor ofte tror du mediene i Norge<br>selvsensurerer reportasjene sine slik at<br>de ikke setter migranter i et dårlig lys? |
| 545 | <a href="#">ocr7mari..</a> | Hvor ofte selvsensurerer<br>mediene i Norge for ikke å<br>sette migranter i dårlig lys:<br>Kan beskyldes for rasisme,<br>pressefriheten lider                        | diskret | numeric-12.0 | 4689    | 0       | Hvor ofte tror du mediene i Norge<br>selvsensurerer reportasjene sine slik at<br>de ikke setter migranter i et dårlig lys? |
| 546 | <a href="#">ocr7mari..</a> | Hvor ofte selvsensurerer<br>mediene i Norge for ikke å<br>sette migranter i dårlig lys:<br>Kan beskyldes for rasisme,<br>pressefriheten lider antydnet<br>av Sputnik | diskret | numeric-12.0 | 4689    | 0       | Hvor ofte tror du mediene i Norge<br>selvsensurerer reportasjene sine slik at<br>de ikke setter migranter i et dårlig lys? |
| 547 | <a href="#">ocr7mari..</a> | Hvor ofte selvsensurerer<br>mediene i Norge for ikke å<br>sette migranter i dårlig lys:<br>NRK ærlig innblikk                                                        | diskret | numeric-12.0 | 4689    | 0       | Hvor ofte tror du mediene i Norge<br>selvsensurerer reportasjene sine slik at<br>de ikke setter migranter i et dårlig lys? |
| 548 | <a href="#">ocr7mari..</a> | Hvor ofte selvsensurerer<br>mediene i Norge for ikke å<br>sette migranter i dårlig lys:<br>NRK innblikk, bevis på fritt<br>media                                     | diskret | numeric-12.0 | 4689    | 0       | Hvor ofte tror du mediene i Norge<br>selvsensurerer reportasjene sine slik at<br>de ikke setter migranter i et dårlig lys? |
| 549 | <a href="#">ocr7mari..</a> | Hvor berettiget er økning i<br>forsvarsutgifter                                                                                                                      | diskret | numeric-12.0 | 4689    | 0       | Hvor berettiget mener du at en slik stor<br>økning av forsvarsutgiftene er?                                                |
| 550 | <a href="#">ocr7mari..</a> | Hvor berettiget er<br>økning i forsvarsutgifter:<br>Fremprovosere russisk<br>oppbygging av militære<br>styrker                                                       | diskret | numeric-12.0 | 4689    | 0       | Hvor berettiget mener du at en slik stor<br>økning av forsvarsutgiftene er?                                                |
| 551 | <a href="#">ocr7mari..</a> | Hvor berettiget er<br>økning i forsvarsutgifter:<br>Fremprovosere russisk<br>oppbygging av militære<br>styrker, Lavrov advarer                                       | diskret | numeric-12.0 | 4689    | 0       | Hvor berettiget mener du at en slik stor<br>økning av forsvarsutgiftene er?                                                |
| 552 | <a href="#">ocr7mari..</a> | Hvor berettiget er økning i<br>forsvarsutgifter: Nødvendig<br>svar på Østersjøområdet                                                                                | diskret | numeric-12.0 | 4689    | 0       | Hvor berettiget mener du at en slik stor<br>økning av forsvarsutgiftene er?                                                |
| 553 | <a href="#">ocr7mari..</a> | Hvor berettiget er økning i<br>forsvarsutgifter: Nødvendig<br>svar på Østersjøområdet,<br>norske sikkerhetsekspert                                                   | diskret | numeric-12.0 | 4689    | 0       | Hvor berettiget mener du at en slik stor<br>økning av forsvarsutgiftene er?                                                |



**Fil Norsk medborgerpanel - runde 7**

| #   | Navn                        | Merkelapp                                                                                                 | Type    | Format       | Gyldige | Ugyldig | Spørsmål                                                                                                                                      |
|-----|-----------------------------|-----------------------------------------------------------------------------------------------------------|---------|--------------|---------|---------|-----------------------------------------------------------------------------------------------------------------------------------------------|
| 554 | <a href="#">r7random ..</a> | randomizedBlockOrder                                                                                      | diskret | character-17 | 4689    | 0       | -                                                                                                                                             |
| 555 | <a href="#">r7ocreca ..</a> | R7OCRECSM_mobile2                                                                                         | diskret | numeric-12.0 | 1176    | 3513    | -                                                                                                                                             |
| 556 | <a href="#">r7ocreca ..</a> | Hvor viktig er god utdanning i avgjørelsen om noen får bosette seg i Norge?                               | diskret | numeric-12.0 | 4689    | 0       | Hvor viktig synes du å ha en god utdanning bør være for å avgjøre om noen som er født, oppvokst og bor utenfor Norge skal få bosette seg her? |
| 557 | <a href="#">r7ocreca ..</a> | Hvor viktig er god utdanning i avgjørelsen om noen får bosette seg i Norge?                               | diskret | numeric-12.0 | 4689    | 0       | Hvor viktig synes du å ha en god utdanning bør være for å avgjøre om noen som er født, oppvokst og bor utenfor Norge skal få bosette seg her? |
| 558 | <a href="#">r7ocreca ..</a> | Hvor viktig er kristen bakgrunn i avgjørelsen om noen får bosette seg i Norge?                            | diskret | numeric-12.0 | 4689    | 0       | Hvor viktig synes du en kristen bakgrunn bør være for å avgjøre om noen skal få bosette seg her?                                              |
| 559 | <a href="#">r7ocreca ..</a> | Hvor viktig er kristen bakgrunn i avgjørelsen om noen får bosette seg i Norge?                            | diskret | numeric-12.0 | 4689    | 0       | Hvor viktig synes du en kristen bakgrunn bør være for å avgjøre om noen skal få bosette seg her?                                              |
| 560 | <a href="#">r7ocreca ..</a> | Hvor viktig er kunnskaper og ferdigheter som Norge trenger i avgjørelsen om noen får bosette seg i Norge? | diskret | numeric-12.0 | 4689    | 0       | Hvor viktig synes du kunnskaper og ferdigheter som Norge trenger bør være for å avgjøre om noen skal få bosette seg her?                      |
| 561 | <a href="#">r7ocreca ..</a> | Hvor viktig er kunnskaper og ferdigheter som Norge trenger i avgjørelsen om noen får bosette seg i Norge? | diskret | numeric-12.0 | 4689    | 0       | Hvor viktig synes du kunnskaper og ferdigheter som Norge trenger bør være for å avgjøre om noen skal få bosette seg her?                      |
| 562 | <a href="#">r7ocreca ..</a> | Hvor viktig er god utdanning i avgjørelsen om noen får bosette seg i Norge?                               | diskret | numeric-12.0 | 4689    | 0       | Hvor viktig synes du å ha en god utdanning bør være for å avgjøre om noen som er født, oppvokst og bor utenfor Norge skal få bosette seg her? |
| 563 | <a href="#">r7ocreca ..</a> | Hvor viktig er god utdanning i avgjørelsen om noen får bosette seg i Norge?                               | diskret | numeric-12.0 | 4689    | 0       | Hvor viktig synes du å ha en god utdanning bør være for å avgjøre om noen som er født, oppvokst og bor utenfor Norge skal få bosette seg her? |
| 564 | <a href="#">r7ocreca ..</a> | Hvor viktig er kristen bakgrunn i avgjørelsen om noen får bosette seg i Norge?                            | diskret | numeric-12.0 | 4689    | 0       | Hvor viktig synes du en kristen bakgrunn bør være for å avgjøre om noen skal få bosette seg her?                                              |
| 565 | <a href="#">r7ocreca ..</a> | Hvor viktig er kristen bakgrunn i avgjørelsen om noen får bosette seg i Norge?                            | diskret | numeric-12.0 | 4689    | 0       | Hvor viktig synes du en kristen bakgrunn bør være for å avgjøre om noen skal få bosette seg her?                                              |
| 566 | <a href="#">r7ocreca ..</a> | Hvor viktig er kunnskaper og ferdigheter som Norge trenger i avgjørelsen om noen får bosette seg i Norge? | diskret | numeric-12.0 | 4689    | 0       | Hvor viktig synes du kunnskaper og ferdigheter som Norge trenger bør være for å avgjøre om noen skal få bosette seg her?                      |
| 567 | <a href="#">r7ocreca ..</a> | Hvor viktig er kunnskaper og ferdigheter som Norge trenger i avgjørelsen om noen får bosette seg i Norge? | diskret | numeric-12.0 | 4689    | 0       | Hvor viktig synes du kunnskaper og ferdigheter som Norge trenger bør være for å avgjøre om noen skal få bosette seg her?                      |
| 568 | <a href="#">r7ocreca ..</a> | Hvor viktig er god utdanning i avgjørelsen om noen får bosette seg i Norge?                               | diskret | numeric-12.0 | 4689    | 0       | Hvor viktig synes du å ha en god utdanning bør være for å avgjøre om noen som er født, oppvokst og bor utenfor Norge skal få bosette seg her? |
| 569 | <a href="#">r7ocreca ..</a> | Hvor viktig er kristen bakgrunn i avgjørelsen om noen får bosette seg i Norge?                            | diskret | numeric-12.0 | 4689    | 0       | Hvor viktig synes du en kristen bakgrunn bør være for å avgjøre om noen skal få bosette seg her?                                              |
| 570 | <a href="#">r7ocreca ..</a> | Hvor viktig er kunnskaper og ferdigheter som Norge                                                        | diskret | numeric-12.0 | 4689    | 0       | Hvor viktig synes du kunnskaper og ferdigheter som Norge trenger bør være                                                                     |



**Fil Norsk medborgerpanel - runde 7**

| #   | Navn                         | Merkelapp                                                                                   | Type    | Format       | Gyldige | Ugyldig | Spørsmål                                                                                                                                                                      |
|-----|------------------------------|---------------------------------------------------------------------------------------------|---------|--------------|---------|---------|-------------------------------------------------------------------------------------------------------------------------------------------------------------------------------|
|     |                              | trenger i avgjørelsen om noen får bosette seg i Norge?                                      |         |              |         |         | for å avgjøre om noen skal få bosette seg her?                                                                                                                                |
| 571 | <a href="#">r7ocreces ..</a> | I hvilken grad bør Høyesteretts makt i kontroversielle saker reduseres?                     | diskret | numeric-12.0 | 4689    | 0       | Generelt sett, i hvilken grad mener du at Norges Høyesteretts makt til å avgjøre visse typer kontroversielle saker bør reduseres?                                             |
| 572 | <a href="#">r7ocreces ..</a> | I hvilken grad bør Høyesteretts makt i kontroversielle saker reduseres?                     | diskret | numeric-12.0 | 4689    | 0       | Generelt sett, i hvilken grad mener du at Norges Høyesteretts makt til å avgjøre visse typer kontroversielle saker bør reduseres?                                             |
| 573 | <a href="#">r7ocreces ..</a> | I hvilken grad favoriserer Høyesterett enkelte grupper?                                     | diskret | numeric-12.0 | 4689    | 0       | I hvilken grad mener du at avgjørelsene til Norges Høyesterett favoriserer enkelte grupper mer enn andre?                                                                     |
| 574 | <a href="#">r7ocreces ..</a> | I hvilken grad favoriserer Høyesterett enkelte grupper?                                     | diskret | numeric-12.0 | 4689    | 0       | I hvilken grad mener du at avgjørelsene til Norges Høyesterett favoriserer enkelte grupper mer enn andre?                                                                     |
| 575 | <a href="#">r7ocreces ..</a> | I hvilken grad kan domstolen avskaffes, dersom Høyesterett tar mange valg folk er uenige i? | diskret | numeric-12.0 | 4689    | 0       | Og i hvilken grad mener du at dersom Norges Høyesterett begynner å ta mange avgjørelser som folk flest er uenige i, kan det være like greit å avskaffe domstolen fullstendig? |
| 576 | <a href="#">r7ocreces ..</a> | I hvilken grad kan domstolen avskaffes, dersom Høyesterett tar mange valg folk er uenige i? | diskret | numeric-12.0 | 4689    | 0       | Og i hvilken grad mener du at dersom Norges Høyesterett begynner å ta mange avgjørelser som folk flest er uenige i, kan det være like greit å avskaffe domstolen fullstendig? |
| 577 | <a href="#">r7ocreces ..</a> | I hvilken grad bør Høyesteretts makt i kontroversielle saker reduseres?                     | diskret | numeric-12.0 | 4689    | 0       | Generelt sett, i hvilken grad mener du at Norges Høyesteretts makt til å avgjøre visse typer kontroversielle saker bør reduseres?                                             |
| 578 | <a href="#">r7ocreces ..</a> | I hvilken grad bør Høyesteretts makt i kontroversielle saker reduseres?                     | diskret | numeric-12.0 | 4689    | 0       | Generelt sett, i hvilken grad mener du at Norges Høyesteretts makt til å avgjøre visse typer kontroversielle saker bør reduseres?                                             |
| 579 | <a href="#">r7ocreces ..</a> | I hvilken grad favoriserer Høyesterett enkelte grupper?                                     | diskret | numeric-12.0 | 4689    | 0       | I hvilken grad mener du at avgjørelsene til Norges Høyesterett favoriserer enkelte grupper mer enn andre?                                                                     |
| 580 | <a href="#">r7ocreces ..</a> | I hvilken grad favoriserer Høyesterett enkelte grupper?                                     | diskret | numeric-12.0 | 4689    | 0       | I hvilken grad mener du at avgjørelsene til Norges Høyesterett favoriserer enkelte grupper mer enn andre?                                                                     |
| 581 | <a href="#">r7ocreces ..</a> | I hvilken grad kan domstolen avskaffes, dersom Høyesterett tar mange valg folk er uenige i? | diskret | numeric-12.0 | 4689    | 0       | Og i hvilken grad mener du at dersom Norges Høyesterett begynner å ta mange avgjørelser som folk flest er uenige i, kan det være like greit å avskaffe domstolen fullstendig? |
| 582 | <a href="#">r7ocreces ..</a> | I hvilken grad kan domstolen avskaffes, dersom Høyesterett tar mange valg folk er uenige i? | diskret | numeric-12.0 | 4689    | 0       | Og i hvilken grad mener du at dersom Norges Høyesterett begynner å ta mange avgjørelser som folk flest er uenige i, kan det være like greit å avskaffe domstolen fullstendig? |
| 583 | <a href="#">r7ocreces ..</a> | I hvilken grad bør Høyesteretts makt i kontroversielle saker reduseres?                     | diskret | numeric-12.0 | 4689    | 0       | Generelt sett, i hvilken grad mener du at Norges Høyesteretts makt til å avgjøre visse typer kontroversielle saker bør reduseres?                                             |

**Fil Norsk medborgerpanel - runde 7**

| #   | Navn                       | Merkelapp                                                                                   | Type    | Format       | Gyldige | Ugyldig | Spørsmål                                                                                                                                                                      |
|-----|----------------------------|---------------------------------------------------------------------------------------------|---------|--------------|---------|---------|-------------------------------------------------------------------------------------------------------------------------------------------------------------------------------|
| 584 | <a href="#">r7ocreca..</a> | I hvilken grad favoriserer Høyesterett enkelte grupper?                                     | diskret | numeric-12.0 | 4689    | 0       | I hvilken grad mener du at avgjørelsene til Norges Høyesterett favoriserer enkelte grupper mer enn andre?                                                                     |
| 585 | <a href="#">r7ocreca..</a> | I hvilken grad kan domstolen avskaffes, dersom Høyesterett tar mange valg folk er uenige i? | diskret | numeric-12.0 | 4689    | 0       | Og i hvilken grad mener du at dersom Norges Høyesterett begynner å ta mange avgjørelser som folk flest er uenige i, kan det være like greit å avskaffe domstolen fullstendig? |
| 586 | <a href="#">r7ran37</a>    | [Randomiserer hvis u=1 eller u=4. ]                                                         | diskret | numeric-12.0 | 2323    | 2366    | -                                                                                                                                                                             |
| 587 | <a href="#">r7qrevie..</a> | Tilfreds med: Spørsmålene i undersøkelsen                                                   | diskret | numeric-12.0 | 4689    | 0       | Spørsmålene du har svart på så langt i denne undersøkelsen?                                                                                                                   |
| 588 | <a href="#">r7qrevie..</a> | Tilfreds med: Deltaker i medborgerpanel                                                     | diskret | numeric-12.0 | 4689    | 0       | Å være deltaker i Norsk medborgerpanel.                                                                                                                                       |
| 589 | <a href="#">r7ran18</a>    | [Randomiserer hvis u=1. ]                                                                   | diskret | numeric-12.0 | 1149    | 3540    | -                                                                                                                                                                             |
| 590 | <a href="#">r7pad4a</a>    | Bidrag til felleskasse: Tilfeldig person ekskludert                                         | diskret | numeric-12.0 | 4689    | 0       | Dersom du er en av deltakerne som trekkes ut til å motta 1000 kr, hvor mye vil du bidra med til felleskassen?                                                                 |
| 591 | <a href="#">r7pad4b</a>    | Bidrag til felleskasse: Person med minst bidrag ekskludert                                  | diskret | numeric-12.0 | 4689    | 0       | Dersom du er en av deltakerne som trekkes ut til å motta 1000 kr, hvor mye vil du bidra med til felleskassen?                                                                 |
| 592 | <a href="#">r7ran19</a>    | [Randomiserer hvis u=4. ]                                                                   | diskret | numeric-12.0 | 1173    | 3516    | -                                                                                                                                                                             |
| 593 | <a href="#">r7pad5a1_1</a> | Valg mellom gul/blå boks                                                                    | diskret | numeric-12.0 | 4689    | 0       | Vennligst ta en beslutning:                                                                                                                                                   |
| 594 | <a href="#">r7pad5b1</a>   | Begrunn valg av gul/blå boks [anonymisert]                                                  | diskret | character-54 | 4689    | 0       | Før du tar beslutningen ønsker vi at du begrunner valget ditt.                                                                                                                |
| 595 | <a href="#">r7pad5b2_1</a> | Valg mellom gul/blå boks                                                                    | diskret | numeric-12.0 | 4689    | 0       | Vennligst ta en beslutning:                                                                                                                                                   |
| 596 | <a href="#">r7pad5c1_1</a> | Valg mellom gul/blå boks: Den andre personen valgte gul                                     | diskret | numeric-12.0 | 4689    | 0       | Den andre personen har valgt den gule boksen. Vennligst ta en beslutning:                                                                                                     |
| 597 | <a href="#">r7pad5d1</a>   | Begrunn valg av gul/blå boks: Den andre personen valgte gul [anonymisert]                   | diskret | character-53 | 4689    | 0       | Den andre personen har valgt den gule boksen. Før du tar beslutningen ønsker vi at du begrunner valget ditt.                                                                  |
| 598 | <a href="#">r7pad5d2_1</a> | Valg mellom gul/blå boks: Den andre personen valgte gul                                     | diskret | numeric-12.0 | 4689    | 0       | Vennligst ta en beslutning:                                                                                                                                                   |
| 599 | <a href="#">r7pad5e1_1</a> | Valg mellom gul/blå boks: Den andre personen valgte blå                                     | diskret | numeric-12.0 | 4689    | 0       | Den andre personen har valgt den blå boksen. Vennligst ta en beslutning:                                                                                                      |
| 600 | <a href="#">r7pad5f1</a>   | Begrunn valg av gul/blå boks: Den andre personen valgte blå [anonymisert]                   | diskret | character-54 | 4689    | 0       | Den andre personen har valgt den blå boksen. Før du tar beslutningen ønsker vi at du begrunner valget ditt.                                                                   |
| 601 | <a href="#">r7pad5f2_1</a> | Valg mellom gul/blå boks: Den andre personen valgte blå                                     | diskret | numeric-12.0 | 4689    | 0       | Vennligst ta en beslutning:                                                                                                                                                   |
| 602 | <a href="#">r7qrevie..</a> | Tilfreds med: Spørsmålene i undersøkelsen                                                   | diskret | numeric-12.0 | 4689    | 0       | Spørsmålene du har svart på så langt i denne undersøkelsen?                                                                                                                   |
| 603 | <a href="#">r7qrevie..</a> | Tilfreds med: Deltaker i medborgerpanel                                                     | diskret | numeric-12.0 | 4689    | 0       | Å være deltaker i Norsk medborgerpanel.                                                                                                                                       |
| 604 | <a href="#">r7munici..</a> | Kommunestørrelse                                                                            | diskret | numeric-55.0 | 4689    | 0       | -                                                                                                                                                                             |
| 605 | <a href="#">r7P1</a>       | Kjønn                                                                                       | diskret | numeric-55.0 | 4689    | 0       | -                                                                                                                                                                             |
| 606 | <a href="#">r7P2</a>       | Region                                                                                      | diskret | numeric-55.0 | 4689    | 0       | -                                                                                                                                                                             |

**Fil Norsk medborgerpanel - runde 7**

| #   | Navn                      | Merkelapp                                                                | Type         | Format       | Gyldige | Ugyldig | Spørsmål |
|-----|---------------------------|--------------------------------------------------------------------------|--------------|--------------|---------|---------|----------|
| 607 | <a href="#">r7P3</a>      | Fylke                                                                    | diskret      | numeric-55.0 | 4689    | 0       | -        |
| 608 | <a href="#">r7P4_1</a>    | Høyeste fullførte utdanning                                              | diskret      | numeric-55.0 | 4689    | 0       | -        |
| 609 | <a href="#">r7P4_2</a>    | Høyeste fullførte utdanning                                              | diskret      | numeric-55.0 | 4689    | 0       | -        |
| 610 | <a href="#">r7P5_1</a>    | Alder                                                                    | diskret      | numeric-55.0 | 4689    | 0       | -        |
| 611 | <a href="#">r7P5_2</a>    | Alder                                                                    | diskret      | numeric-55.0 | 4689    | 0       | -        |
| 612 | <a href="#">r7Weight1</a> | Vekt basert på variablene P3, P5_2 og P1. Se dokumentasjonsrapport       | kontinuerlig | numeric-55.4 | 4689    | 0       | -        |
| 613 | <a href="#">r7Weight2</a> | Vekt basert på variablene P3, P5_2, P4_1 og P1. Se dokumentasjonsrapport | kontinuerlig | numeric-55.4 | 4689    | 0       | -        |

# Variabelbeskrivelse

Datasettet inneholder 613 variable(r)

## Fil : Norsk medborgerpanel - runde 7

### # responseid: responseid

**Informasjon** [Type= diskret] [Format=numeric] [Rekkevidde= 1-1] [Missing=\*]

### # r7u: Undergruppe

**Informasjon** [Type= diskret] [Format=numeric] [Rekkevidde= 1-4] [Missing=\*]

**Statistikk [NW/ W]** [Gyldige=4689 /-] [Ugyldig=0 /-]

| Verdi | Merkelapp | Enheter | Prosent                      |
|-------|-----------|---------|------------------------------|
| 1     | U1        | 1184    | <div><div></div></div> 25.3% |
| 2     | U2        | 1199    | <div><div></div></div> 25.6% |
| 3     | U3        | 1103    | <div><div></div></div> 23.5% |
| 4     | U4        | 1203    | <div><div></div></div> 25.7% |

*Advarsel: disse tallene indikerer antall enheter (cases) i datafilen. De kan ikke tolkes som oppsummert statistikk for populasjonen.*

### # r7recruited: Tidspunkt for rekruttering

**Informasjon** [Type= diskret] [Format=numeric] [Rekkevidde= 1-3] [Missing=\*]

**Statistikk [NW/ W]** [Gyldige=4689 /-] [Ugyldig=0 /-]

| Verdi | Merkelapp | Enheter | Prosent                      |
|-------|-----------|---------|------------------------------|
| 1     | Runde 1   | 2190    | <div><div></div></div> 46.7% |
| 3     | Runde 3   | 2499    | <div><div></div></div> 53.3% |

*Advarsel: disse tallene indikerer antall enheter (cases) i datafilen. De kan ikke tolkes som oppsummert statistikk for populasjonen.*

### # r7browsertype: Type nettleser brukt av respondent

**Informasjon** [Type= diskret] [Format=character] [Missing=\*]

**Statistikk [NW/ W]** [Gyldige=4689 /-] [Ugyldig=0 /-]

| Verdi            | Merkelapp | Enheter | Prosent                      |
|------------------|-----------|---------|------------------------------|
| Chrome           |           | 1957    | <div><div></div></div> 41.7% |
| Firefox          |           | 373     | <div><div></div></div> 8.0%  |
| IE               |           | 31      | <div><div></div></div> 0.7%  |
| InternetExplorer |           | 741     | <div><div></div></div> 15.8% |
| Mozilla          |           | 115     | <div><div></div></div> 2.5%  |
| Opera            |           | 4       | <div><div></div></div> 0.1%  |
| Safari           |           | 1467    | <div><div></div></div> 31.3% |
| Unknown          |           | 1       | <div><div></div></div> 0.0%  |

*Advarsel: disse tallene indikerer antall enheter (cases) i datafilen. De kan ikke tolkes som oppsummert statistikk for populasjonen.*

### # r7browserversion: Nettleserversjon brukt av respondent

**Informasjon** [Type= diskret] [Format=character] [Missing=\*]

**Statistikk [NW/ W]** [Gyldige=4689 /-] [Ugyldig=0 /-]

| Verdi | Merkelapp | Enheter | Prosent                      |
|-------|-----------|---------|------------------------------|
| 0     |           | 155     | <div><div></div></div> 3.3%  |
| 10    |           | 945     | <div><div></div></div> 20.2% |
| 10,3  |           | 1       | <div><div></div></div> 0.0%  |
| 11    |           | 741     | <div><div></div></div> 15.8% |
| 27    |           | 1       | <div><div></div></div> 0.0%  |
| 28    |           | 5       | <div><div></div></div> 0.1%  |
| 30    |           | 3       | <div><div></div></div> 0.1%  |

## Fil : Norsk medborgerpanel - runde 7

# r7browserversion: Nettleserversjon brukt av respondent

| Verdi | Merkelapp | Enheter | Prosent |
|-------|-----------|---------|---------|
| 31    |           | 2       | 0.0%    |
| 33    |           | 3       | 0.1%    |
| 34    |           | 9       | 0.2%    |
| 36    |           | 1       | 0.0%    |
| 38    |           | 35      | 0.7%    |
| 39    |           | 2       | 0.0%    |
| 40    |           | 1       | 0.0%    |
| 41    |           | 3       | 0.1%    |
| 42    |           | 7       | 0.1%    |
| 43    |           | 4       | 0.1%    |
| 44    |           | 132     | 2.8%    |
| 45    |           | 11      | 0.2%    |
| 46    |           | 71      | 1.5%    |
| 47    |           | 11      | 0.2%    |
| 48    |           | 21      | 0.4%    |
| 49    |           | 366     | 7.8%    |
| 5     |           | 4       | 0.1%    |
| 5,1   |           | 6       | 0.1%    |
| 50    |           | 20      | 0.4%    |
| 51    |           | 408     | 8.7%    |
| 52    |           | 11      | 0.2%    |
| 53    |           | 99      | 2.1%    |
| 54    |           | 1096    | 23.4%   |
| 54,2  |           | 1       | 0.0%    |
| 56    |           | 7       | 0.1%    |
| 6     |           | 4       | 0.1%    |
| 6,1   |           | 5       | 0.1%    |
| 6,2   |           | 7       | 0.1%    |
| 7     |           | 33      | 0.7%    |
| 8     |           | 68      | 1.5%    |
| 9     |           | 316     | 6.7%    |
| 9,1   |           | 70      | 1.5%    |
| 9,8   |           | 4       | 0.1%    |

Advarsel: disse tallene indikerer antall enheter (cases) i datafilen. De kan ikke tolkes som oppsummert statistikk for populasjonen.

# r7mobile: Om respondenten bruker mobil til å svare på spørreskjema

| Informasjon        | [Type= diskret] [Format=numeric] [Rekkevidde= 0-1] [Missing=*] |         |         |
|--------------------|----------------------------------------------------------------|---------|---------|
| Statistikk [NW/ W] | [Gyldige=4689 /-] [Ugyldig=0 /-]                               |         |         |
| Verdi              | Merkelapp                                                      | Enheter | Prosent |
| 0                  | Annet                                                          | 3396    | 72.4%   |
| 1                  | Mobil                                                          | 1293    | 27.6%   |

Advarsel: disse tallene indikerer antall enheter (cases) i datafilen. De kan ikke tolkes som oppsummert statistikk for populasjonen.

## Fil : Norsk medborgerpanel - runde 7

# r7deviceResolution: Skjermopløsningen til enheten respondenten bruker til å svare på spørsmålet

**Informasjon** [Type= diskret] [Format=character] [Missing=\*]

**Statistikk [NW/ W]** [Gyldige=4689 /-] [Ugyldig=0 /-]

| Verdi    | Merkelapp | Enheter | Prosent           |
|----------|-----------|---------|-------------------|
| 0 0      |           | 3405    | <div></div> 72.6% |
| 106 284  |           | 1       | <div></div> 0.0%  |
| 1098 800 |           | 1       | <div></div> 0.0%  |
| 1112 800 |           | 2       | <div></div> 0.0%  |
| 112 199  |           | 1       | <div></div> 0.0%  |
| 1143 800 |           | 1       | <div></div> 0.0%  |
| 115 320  |           | 1       | <div></div> 0.0%  |
| 125 90   |           | 3       | <div></div> 0.1%  |
| 128 90   |           | 52      | <div></div> 1.1%  |
| 129 90   |           | 2       | <div></div> 0.0%  |
| 131 180  |           | 1       | <div></div> 0.0%  |
| 131 90   |           | 2       | <div></div> 0.0%  |
| 132 90   |           | 1       | <div></div> 0.0%  |
| 136 90   |           | 2       | <div></div> 0.0%  |
| 139 90   |           | 1       | <div></div> 0.0%  |
| 140 90   |           | 59      | <div></div> 1.3%  |
| 141 90   |           | 1       | <div></div> 0.0%  |
| 142 90   |           | 18      | <div></div> 0.4%  |
| 143 90   |           | 2       | <div></div> 0.0%  |
| 154 90   |           | 1       | <div></div> 0.0%  |
| 160 284  |           | 7       | <div></div> 0.1%  |
| 163 120  |           | 1       | <div></div> 0.0%  |
| 166 120  |           | 7       | <div></div> 0.1%  |
| 170 120  |           | 81      | <div></div> 1.7%  |
| 171 115  |           | 1       | <div></div> 0.0%  |
| 172 117  |           | 7       | <div></div> 0.1%  |
| 173 120  |           | 1       | <div></div> 0.0%  |
| 174 120  |           | 23      | <div></div> 0.5%  |
| 178 120  |           | 1       | <div></div> 0.0%  |
| 178 160  |           | 4       | <div></div> 0.1%  |
| 186 117  |           | 6       | <div></div> 0.1%  |
| 186 120  |           | 65      | <div></div> 1.4%  |
| 186 125  |           | 21      | <div></div> 0.4%  |
| 186 160  |           | 35      | <div></div> 0.7%  |
| 187 120  |           | 2       | <div></div> 0.0%  |
| 187 333  |           | 3       | <div></div> 0.1%  |
| 188 117  |           | 1       | <div></div> 0.0%  |
| 189 120  |           | 5       | <div></div> 0.1%  |
| 193 120  |           | 3       | <div></div> 0.1%  |
| 202 160  |           | 1       | <div></div> 0.0%  |
| 205 120  |           | 4       | <div></div> 0.1%  |

## Fil : Norsk medborgerpanel - runde 7

# r7deviceResolution: Skjermoppløsningen til enheten respondenten bruker til å svare på spørsmålet

| Verdi     | Merkelapp | Enheter | Prosent |
|-----------|-----------|---------|---------|
| 207 160   |           | 1       | 0.0%    |
| 209 138   |           | 40      | 0.9%    |
| 213 120   |           | 1       | 0.0%    |
| 2176 1440 |           | 1       | 0.0%    |
| 220 138   |           | 1       | 0.0%    |
| 220 160   |           | 1       | 0.0%    |
| 230 156   |           | 1       | 0.0%    |
| 230 160   |           | 264     | 5.6%    |
| 246 160   |           | 4       | 0.1%    |
| 249 160   |           | 1       | 0.0%    |
| 252 160   |           | 1       | 0.0%    |
| 255 180   |           | 19      | 0.4%    |
| 256 180   |           | 36      | 0.8%    |
| 260 172   |           | 1       | 0.0%    |
| 262 180   |           | 5       | 0.1%    |
| 266 180   |           | 1       | 0.0%    |
| 268 180   |           | 1       | 0.0%    |
| 270 213   |           | 4       | 0.1%    |
| 272 180   |           | 1       | 0.0%    |
| 273 187   |           | 2       | 0.0%    |
| 279 180   |           | 10      | 0.2%    |
| 279 187   |           | 311     | 6.6%    |
| 280 180   |           | 3       | 0.1%    |
| 283 180   |           | 8       | 0.2%    |
| 284 180   |           | 3       | 0.1%    |
| 292 213   |           | 1       | 0.0%    |
| 295 187   |           | 7       | 0.1%    |
| 301 213   |           | 1       | 0.0%    |
| 302 213   |           | 4       | 0.1%    |
| 306 213   |           | 1       | 0.0%    |
| 307 180   |           | 1       | 0.0%    |
| 316 640   |           | 1       | 0.0%    |
| 324 512   |           | 1       | 0.0%    |
| 325 213   |           | 1       | 0.0%    |
| 325 722   |           | 1       | 0.0%    |
| 328 213   |           | 1       | 0.0%    |
| 331 722   |           | 1       | 0.0%    |
| 332 640   |           | 1       | 0.0%    |
| 333 213   |           | 1       | 0.0%    |
| 334 640   |           | 4       | 0.1%    |
| 335 640   |           | 2       | 0.0%    |
| 340 640   |           | 3       | 0.1%    |
| 341 240   |           | 2       | 0.0%    |



## Fil : Norsk medborgerpanel - runde 7

# r7deviceResolution: Skjermoppløsningen til enheten respondenten bruker til å svare på spørsmålet

| Verdi    | Merkelapp | Enheter | Prosent |
|----------|-----------|---------|---------|
| 347 205  |           | 1       | 0.0%    |
| 350 240  |           | 1       | 0.0%    |
| 350 640  |           | 1       | 0.0%    |
| 361 722  |           | 1       | 0.0%    |
| 363 640  |           | 1       | 0.0%    |
| 372 240  |           | 5       | 0.1%    |
| 373 240  |           | 3       | 0.1%    |
| 375 240  |           | 1       | 0.0%    |
| 378 240  |           | 1       | 0.0%    |
| 388 640  |           | 1       | 0.0%    |
| 394 240  |           | 3       | 0.1%    |
| 396 300  |           | 1       | 0.0%    |
| 398 300  |           | 1       | 0.0%    |
| 401 320  |           | 2       | 0.0%    |
| 410 240  |           | 1       | 0.0%    |
| 414 1024 |           | 1       | 0.0%    |
| 414 853  |           | 1       | 0.0%    |
| 416 853  |           | 1       | 0.0%    |
| 420 853  |           | 4       | 0.1%    |
| 421 853  |           | 1       | 0.0%    |
| 427 384  |           | 1       | 0.0%    |
| 452 384  |           | 3       | 0.1%    |
| 463 962  |           | 1       | 0.0%    |
| 492 324  |           | 1       | 0.0%    |
| 541 357  |           | 1       | 0.0%    |
| 579 400  |           | 1       | 0.0%    |
| 581 383  |           | 3       | 0.1%    |
| 596 451  |           | 1       | 0.0%    |
| 616 1280 |           | 1       | 0.0%    |
| 618 1280 |           | 3       | 0.1%    |
| 619 452  |           | 1       | 0.0%    |
| 623 1280 |           | 1       | 0.0%    |
| 625 381  |           | 1       | 0.0%    |
| 631 1280 |           | 4       | 0.1%    |
| 637 1024 |           | 1       | 0.0%    |
| 638 1024 |           | 1       | 0.0%    |
| 638 1280 |           | 2       | 0.0%    |
| 642 1280 |           | 1       | 0.0%    |
| 648 1024 |           | 2       | 0.0%    |
| 661 1280 |           | 6       | 0.1%    |
| 665 1280 |           | 1       | 0.0%    |
| 666 1280 |           | 7       | 0.1%    |
| 666 1281 |           | 1       | 0.0%    |

## Fil : Norsk medborgerpanel - runde 7

### # r7deviceResolution: Skjermoppløsningen til enheten respondenten bruker til å svare på spørsmålet

| Verdi    | Merkelapp | Enheter | Prosent |
|----------|-----------|---------|---------|
| 679 1280 |           | 8       | 0.2%    |
| 696 1280 |           | 1       | 0.0%    |
| 70 160   |           | 1       | 0.0%    |
| 740 533  |           | 1       | 0.0%    |
| 741 533  |           | 1       | 0.0%    |
| 74 0     |           | 1       | 0.0%    |
| 773 533  |           | 1       | 0.0%    |
| 894 768  |           | 2       | 0.0%    |
| 896 768  |           | 1       | 0.0%    |
| 903 600  |           | 1       | 0.0%    |
| 903 768  |           | 1       | 0.0%    |
| 904 768  |           | 1       | 0.0%    |
| 910 600  |           | 1       | 0.0%    |

Advarsel: disse tallene indikerer antall enheter (cases) i datafilen. De kan ikke tolkes som oppsummert statistikk for populasjonen.

### # r7device: Determinerer hvilken enhetstype respondenten bruker til å svare på spørsmålet

|                                |                                                                |
|--------------------------------|----------------------------------------------------------------|
| Informasjon                    | [Type= diskret] [Format=numeric] [Rekkevidde= 1-3] [Missing=*] |
| Statistikk [NW/ W]             | [Gyldige=4689 /-] [Ugyldig=0 /-]                               |
| Instruksjoner til intervjueren | [Determinerer hvilken enhetstype respondenten bruker. ]        |

| Verdi | Merkelapp | Enheter | Prosent |
|-------|-----------|---------|---------|
| 1     | PC        | 3463    | 73.9%   |
| 2     | Touch     | 1217    | 26.0%   |
| 3     | Generisk  | 9       | 0.2%    |

Advarsel: disse tallene indikerer antall enheter (cases) i datafilen. De kan ikke tolkes som oppsummert statistikk for populasjonen.

### # r7advancedwifeaturesenabled: Sjekker om respondenten sin nettleaser støtter Adwanced WI Features som krever klientside skript. Eksempler: slider, dra og slipp, bilder som svarknapper.

|                                |                                                                                                                                                                                                             |
|--------------------------------|-------------------------------------------------------------------------------------------------------------------------------------------------------------------------------------------------------------|
| Informasjon                    | [Type= diskret] [Format=character] [Missing=*]                                                                                                                                                              |
| Statistikk [NW/ W]             | [Gyldige=4689 /-] [Ugyldig=0 /-]                                                                                                                                                                            |
| Instruksjoner til intervjueren | [Determinerer om respondenten sin nettleaser støtter "AdvancedWIFeatures som krever klient-side skript, slik som slidere, dra og slipp, rangering og bilder i stedet for radio-knapper/avkryssingsbokser. ] |

| Verdi | Merkelapp | Enheter | Prosent |
|-------|-----------|---------|---------|
| FALSE |           | 17      | 0.4%    |
| TRUE  |           | 4672    | 99.6%   |

Advarsel: disse tallene indikerer antall enheter (cases) i datafilen. De kan ikke tolkes som oppsummert statistikk for populasjonen.

### # r7ktlfreds\_1: Tilfreds med: Livet nå om dagen

|                                |                                                                                                                 |
|--------------------------------|-----------------------------------------------------------------------------------------------------------------|
| Informasjon                    | [Type= diskret] [Format=numeric] [Rekkevidde= 1-5] [Missing=*]                                                  |
| Statistikk [NW/ W]             | [Gyldige=4689 /-] [Ugyldig=0 /-]                                                                                |
| Tekst før spørsmål             | Vi ønsker å starte med å stille deg noen spørsmål om tilfredshet. Hvor tilfreds er du med:                      |
| Spørsmålstekst                 | Livet nå om dagen?                                                                                              |
| Instruksjoner til intervjueren | [Alle respondenter spurt. ]                                                                                     |
| Kommentarer                    | Livet nå om dagen? (Vi ønsker å starte med å stille deg noen spørsmål om tilfredshet. Hvor tilfreds er du med:) |

## Fil : Norsk medborgerpanel - runde 7

### # r7ktilfreds\_1: Tilfreds med: Livet nå om dagen

| Verdi | Merkelapp                     | Enheter | Prosent                                                                                   |
|-------|-------------------------------|---------|-------------------------------------------------------------------------------------------|
| 1     | Svært tilfreds                | 1121    | 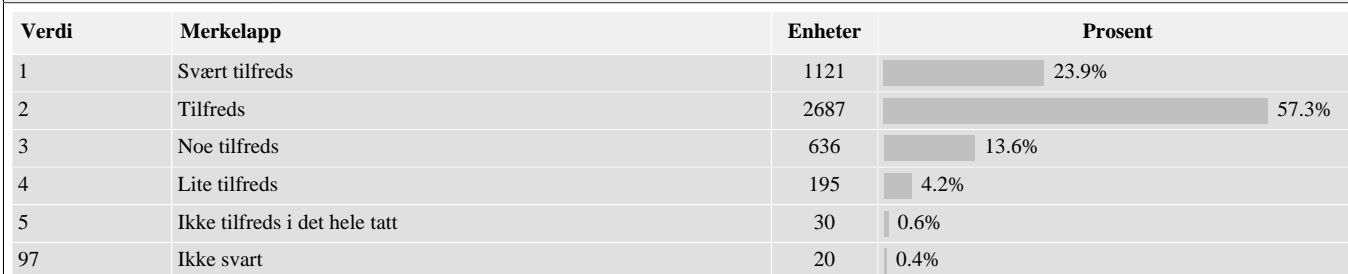 23.9% |
| 2     | Tilfreds                      | 2687    |  57.3% |
| 3     | Noe tilfreds                  | 636     |  13.6% |
| 4     | Lite tilfreds                 | 195     |  4.2%  |
| 5     | Ikke tilfreds i det hele tatt | 30      |  0.6%  |
| 97    | Ikke svart                    | 20      |  0.4%  |

Advarsel: disse tallene indikerer antall enheter (cases) i datafilen. De kan ikke tolkes som oppsummert statistikk for populasjonen.

### # r7ktilfreds\_2: Tilfreds med: Din personlige økonomi

|                                |                                                                                                                    |
|--------------------------------|--------------------------------------------------------------------------------------------------------------------|
| Informasjon                    | [Type= diskret] [Format=numeric] [Rekkevidde= 1-5] [Missing=*]                                                     |
| Statistikk [NW/ W]             | [Gyldige=4689 /-] [Ugyldig=0 /-]                                                                                   |
| Tekst før spørsmål             | Vi ønsker å starte med å stille deg noen spørsmål om tilfredshet. Hvor tilfreds er du med:                         |
| Spørsmålstekst                 | Din personlige økonomi?                                                                                            |
| Instruksjoner til intervjueren | [Alle respondenter spurt. ]                                                                                        |
| Kommentarer                    | Din personlige økonomi? (Vi ønsker å starte med å stille deg noen spørsmål om tilfredshet. Hvor tilfreds er du med |

| Verdi | Merkelapp                     | Enheter | Prosent                                                                                     |
|-------|-------------------------------|---------|---------------------------------------------------------------------------------------------|
| 1     | Svært tilfreds                | 820     | 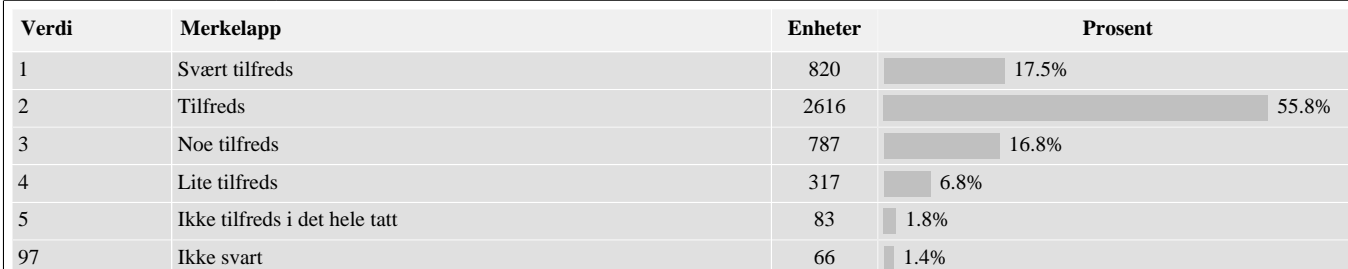 17.5%   |
| 2     | Tilfreds                      | 2616    |  55.8%  |
| 3     | Noe tilfreds                  | 787     |  16.8% |
| 4     | Lite tilfreds                 | 317     |  6.8%  |
| 5     | Ikke tilfreds i det hele tatt | 83      |  1.8%  |
| 97    | Ikke svart                    | 66      |  1.4%  |

Advarsel: disse tallene indikerer antall enheter (cases) i datafilen. De kan ikke tolkes som oppsummert statistikk for populasjonen.

### # r7ktilfreds\_3: Tilfreds med: Regjeringen i Norge

|                                |                                                                                                                     |
|--------------------------------|---------------------------------------------------------------------------------------------------------------------|
| Informasjon                    | [Type= diskret] [Format=numeric] [Rekkevidde= 1-5] [Missing=*]                                                      |
| Statistikk [NW/ W]             | [Gyldige=4689 /-] [Ugyldig=0 /-]                                                                                    |
| Tekst før spørsmål             | Vi ønsker å starte med å stille deg noen spørsmål om tilfredshet. Hvor tilfreds er du med:                          |
| Spørsmålstekst                 | Dagens regjering i Norge?                                                                                           |
| Instruksjoner til intervjueren | [Alle respondenter spurt. ]                                                                                         |
| Kommentarer                    | Dagens regjering i Norge? (Vi ønsker å starte med å stille deg noen spørsmål om tilfredshet. Hvor tilfreds er du me |

| Verdi | Merkelapp                     | Enheter | Prosent                                                                                     |
|-------|-------------------------------|---------|---------------------------------------------------------------------------------------------|
| 1     | Svært tilfreds                | 183     | 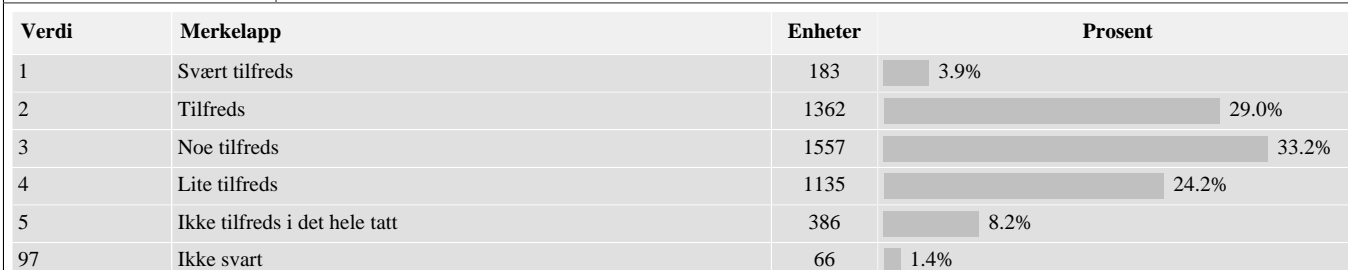 3.9%  |
| 2     | Tilfreds                      | 1362    |  29.0% |
| 3     | Noe tilfreds                  | 1557    |  33.2% |
| 4     | Lite tilfreds                 | 1135    |  24.2% |
| 5     | Ikke tilfreds i det hele tatt | 386     |  8.2%  |
| 97    | Ikke svart                    | 66      |  1.4%  |

Advarsel: disse tallene indikerer antall enheter (cases) i datafilen. De kan ikke tolkes som oppsummert statistikk for populasjonen.

### # r7ktilfreds\_4: Tilfreds med: Demokratiet i Norge

|             |                                                                |
|-------------|----------------------------------------------------------------|
| Informasjon | [Type= diskret] [Format=numeric] [Rekkevidde= 1-5] [Missing=*] |
|-------------|----------------------------------------------------------------|

## Fil : Norsk medborgerpanel - runde 7

### # r7ktilfreds\_4: Tilfreds med: Demokratiet i Norge

|                                       |                                                                                                                   |
|---------------------------------------|-------------------------------------------------------------------------------------------------------------------|
| <b>Statistikk [NW/ W]</b>             | [Gyldige=4689 /-] [Ugyldig=0 /-]                                                                                  |
| <b>Tekst før spørsmål</b>             | Vi ønsker å starte med å stille deg noen spørsmål om tilfredshet. Hvor tilfreds er du med:                        |
| <b>Spørsmålstekst</b>                 | Måten demokratiet fungerer på i Norge?                                                                            |
| <b>Instruksjoner til intervjueren</b> | [Alle respondenter spurt. ]                                                                                       |
| <b>Kommentarer</b>                    | Måten demokratiet fungerer på i Norge? (Vi ønsker å starte med å stille deg noen spørsmål om tilfredshet. Hvor ti |

| Verdi | Merkelapp                     | Enheter | Prosent                                                                                   |
|-------|-------------------------------|---------|-------------------------------------------------------------------------------------------|
| 1     | Svært tilfreds                | 490     | 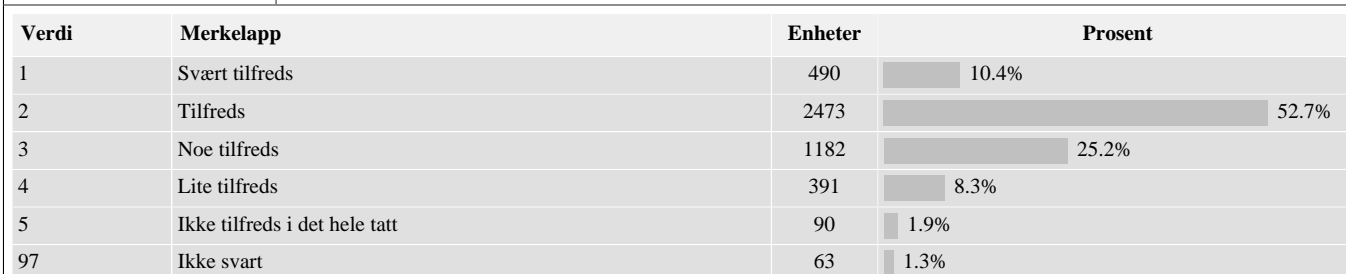 10.4% |
| 2     | Tilfreds                      | 2473    |  52.7% |
| 3     | Noe tilfreds                  | 1182    |  25.2% |
| 4     | Lite tilfreds                 | 391     |  8.3%  |
| 5     | Ikke tilfreds i det hele tatt | 90      |  1.9%  |
| 97    | Ikke svart                    | 63      |  1.3%  |

Advarsel: disse tallene indikerer antall enheter (cases) i datafilen. De kan ikke tolkes som oppsummert statistikk for populasjonen.

### # r7k10: Oppfatning økonomisk situasjon i Norge

|                                       |                                                                |
|---------------------------------------|----------------------------------------------------------------|
| <b>Informasjon</b>                    | [Type= diskret] [Format=numeric] [Rekkevidde= 1-7] [Missing=*] |
| <b>Statistikk [NW/ W]</b>             | [Gyldige=4689 /-] [Ugyldig=0 /-]                               |
| <b>Spørsmålstekst</b>                 | Hvordan oppfatter du den økonomiske situasjonen i Norge i dag? |
| <b>Tekst etter spørsmål</b>           | Synes du den er:                                               |
| <b>Instruksjoner til intervjueren</b> | [Alle respondenter spurt. ]                                    |

| Verdi | Merkelapp               | Enheter | Prosent                                                                                     |
|-------|-------------------------|---------|---------------------------------------------------------------------------------------------|
| 1     | Svært god               | 569     | 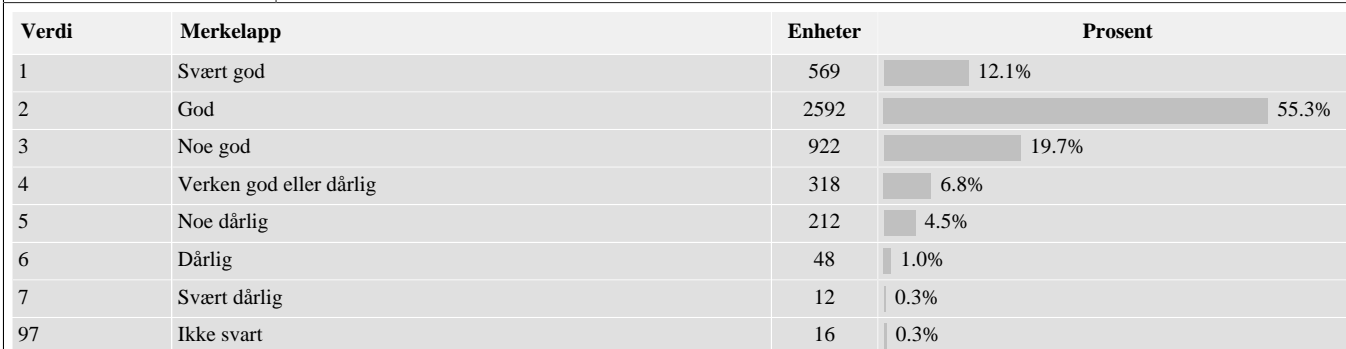 12.1% |
| 2     | God                     | 2592    |  55.3% |
| 3     | Noe god                 | 922     |  19.7% |
| 4     | Verken god eller dårlig | 318     |  6.8%  |
| 5     | Noe dårlig              | 212     |  4.5%  |
| 6     | Dårlig                  | 48      |  1.0%  |
| 7     | Svært dårlig            | 12      |  0.3%  |
| 97    | Ikke svart              | 16      |  0.3%  |

Advarsel: disse tallene indikerer antall enheter (cases) i datafilen. De kan ikke tolkes som oppsummert statistikk for populasjonen.

### # r7k204: Ville stemt på følgende parti hvis stortingsvalg i morgen

|                                       |                                                                           |
|---------------------------------------|---------------------------------------------------------------------------|
| <b>Informasjon</b>                    | [Type= diskret] [Format=numeric] [Rekkevidde= 1-12] [Missing=*]           |
| <b>Statistikk [NW/ W]</b>             | [Gyldige=4689 /-] [Ugyldig=0 /-]                                          |
| <b>Spørsmålstekst</b>                 | Hvilket parti ville du ha stemt på dersom det var stortingsvalg i morgen? |
| <b>Instruksjoner til intervjueren</b> | [Alle respondenter spurt. ]                                               |

| Verdi | Merkelapp            | Enheter | Prosent                                                                                     |
|-------|----------------------|---------|---------------------------------------------------------------------------------------------|
| 1     | Kristelig Folkeparti | 201     | 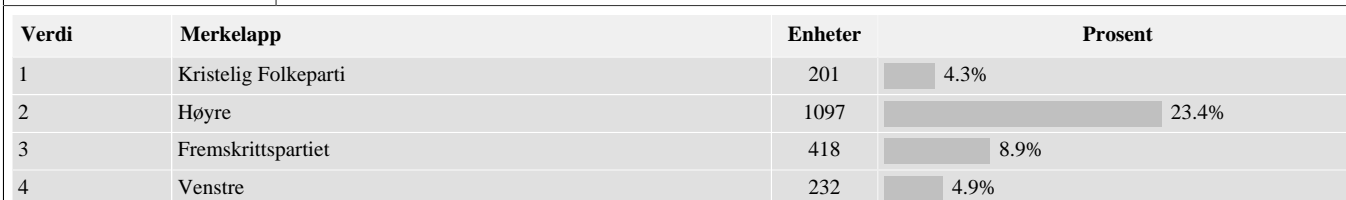 4.3%  |
| 2     | Høyre                | 1097    |  23.4% |
| 3     | Fremskrittspartiet   | 418     |  8.9%  |
| 4     | Venstre              | 232     |  4.9%  |

## Fil : Norsk medborgerpanel - runde 7

### # r7k204: Ville stemt på følgende parti hvis stortingsvalg i morgen

| Verdi | Merkelapp                 | Enheter | Prosent |
|-------|---------------------------|---------|---------|
| 5     | Sosialistisk Venstreparti | 263     | 5.6%    |
| 6     | Senterpartiet             | 261     | 5.6%    |
| 7     | Miljøpartiet De Grønne    | 177     | 3.8%    |
| 8     | Arbeiderpartiet           | 1519    | 32.4%   |
| 9     | Rødt                      | 126     | 2.7%    |
| 10    | Ville ikke stemt          | 152     | 3.2%    |
| 11    | Har ikke stemmerett       | 83      | 1.8%    |
| 12    | Andre:                    | 124     | 2.6%    |
| 97    | Ikke svart                | 36      | 0.8%    |

Advarsel: disse tallene indikerer antall enheter (cases) i datafilen. De kan ikke tolkes som oppsummert statistikk for populasjonen.

### # r7k204\_12\_other: Ville stemt på følgende parti hvis stortingsvalg i morgen, annet [anonymisert]

|                                |                                                                                    |
|--------------------------------|------------------------------------------------------------------------------------|
| Informasjon                    | [Type= diskret] [Format=character] [Missing=*]                                     |
| Statistikk [NW/ W]             | [Gyldige=4689 /-] [Ugyldig=0 /-]                                                   |
| Spørsmålstekst                 | Hvilket parti ville du ha stemt på dersom det var stortingsvalg i morgen?          |
| Instruksjoner til intervjueren | [Alle respondenter spurt. ]<br>[Data tilbakeholdt av hensyn til anonymitet]        |
| Kommentarer                    | Annet: (Hvilket parti ville du ha stemt på dersom det var stortingsvalg i morgen?) |

| Verdi | Merkelapp | Enheter | Prosent |
|-------|-----------|---------|---------|
|       |           | 4689    | 100.0%  |

Advarsel: disse tallene indikerer antall enheter (cases) i datafilen. De kan ikke tolkes som oppsummert statistikk for populasjonen.

### # r7k6\_1: Liker/misliker: KrF

|                                |                                                                                                                           |
|--------------------------------|---------------------------------------------------------------------------------------------------------------------------|
| Informasjon                    | [Type= diskret] [Format=numeric] [Rekkevidde= 1-7] [Missing=*]                                                            |
| Statistikk [NW/ W]             | [Gyldige=4689 /-] [Ugyldig=0 /-]                                                                                          |
| Tekst før spørsmål             | Vi vil gjerne be deg vurdere hvor mye du liker eller misliker de ulike politiske partiene i Norge.                        |
| Spørsmålstekst                 | Kristelig Folkeparti                                                                                                      |
| Instruksjoner til intervjueren | [Alle respondenter spurt. ]                                                                                               |
| Kommentarer                    | Kristelig Folkeparti (Vi vil gjerne be deg vurdere hvor mye du liker eller misliker de ulike politiske partiene i Norge.) |

| Verdi | Merkelapp                   | Enheter | Prosent |
|-------|-----------------------------|---------|---------|
| 1     | Misliker svært mye          | 492     | 10.5%   |
| 2     | Misliker mye                | 769     | 16.4%   |
| 3     | Misliker noe                | 1156    | 24.7%   |
| 4     | Verken misliker eller liker | 1059    | 22.6%   |
| 5     | Liker noe                   | 857     | 18.3%   |
| 6     | Liker mye                   | 224     | 4.8%    |
| 7     | Liker svært mye             | 43      | 0.9%    |
| 97    | Ikke svart                  | 89      | 1.9%    |

Advarsel: disse tallene indikerer antall enheter (cases) i datafilen. De kan ikke tolkes som oppsummert statistikk for populasjonen.

### # r7k6\_2: Liker/misliker: Høyre

|                    |                                                                |
|--------------------|----------------------------------------------------------------|
| Informasjon        | [Type= diskret] [Format=numeric] [Rekkevidde= 1-7] [Missing=*] |
| Statistikk [NW/ W] | [Gyldige=4689 /-] [Ugyldig=0 /-]                               |

## Fil : Norsk medborgerpanel - runde 7

### # r7k6\_2: Liker/misliker: Høyre

|                                       |                                                                                                            |
|---------------------------------------|------------------------------------------------------------------------------------------------------------|
| <b>Tekst før spørsmål</b>             | Vi vil gjerne be deg vurdere hvor mye du liker eller misliker de ulike politiske partiene i Norge.         |
| <b>Spørsmålstekst</b>                 | Høyre                                                                                                      |
| <b>Instruksjoner til intervjueren</b> | [Alle respondenter spurt. ]                                                                                |
| <b>Kommentarer</b>                    | Høyre (Vi vil gjerne be deg vurdere hvor mye du liker eller misliker de ulike politiske partiene i Norge.) |

| Verdi | Merkelapp                   | Enheter | Prosent |
|-------|-----------------------------|---------|---------|
| 1     | Misliker svært mye          | 197     | 4.2%    |
| 2     | Misliker mye                | 522     | 11.1%   |
| 3     | Misliker noe                | 972     | 20.7%   |
| 4     | Verken misliker eller liker | 611     | 13.0%   |
| 5     | Liker noe                   | 1143    | 24.4%   |
| 6     | Liker mye                   | 940     | 20.0%   |
| 7     | Liker svært mye             | 209     | 4.5%    |
| 97    | Ikke svart                  | 95      | 2.0%    |

Advarsel: disse tallene indikerer antall enheter (cases) i datafilen. De kan ikke tolkes som oppsummert statistikk for populasjonen.

### # r7k6\_3: Liker/misliker: FrP

|                                       |                                                                                                                         |
|---------------------------------------|-------------------------------------------------------------------------------------------------------------------------|
| <b>Informasjon</b>                    | [Type= diskret] [Format=numeric] [Rekkevidde= 1-7] [Missing=*]                                                          |
| <b>Statistikk [NW/ W]</b>             | [Gyldige=4689 /-] [Ugyldig=0 /-]                                                                                        |
| <b>Tekst før spørsmål</b>             | Vi vil gjerne be deg vurdere hvor mye du liker eller misliker de ulike politiske partiene i Norge.                      |
| <b>Spørsmålstekst</b>                 | Fremskrittspartiet                                                                                                      |
| <b>Instruksjoner til intervjueren</b> | [Alle respondenter spurt. ]                                                                                             |
| <b>Kommentarer</b>                    | Fremskrittspartiet (Vi vil gjerne be deg vurdere hvor mye du liker eller misliker de ulike politiske partiene i Norge.) |

| Verdi | Merkelapp                   | Enheter | Prosent |
|-------|-----------------------------|---------|---------|
| 1     | Misliker svært mye          | 1222    | 26.1%   |
| 2     | Misliker mye                | 925     | 19.7%   |
| 3     | Misliker noe                | 721     | 15.4%   |
| 4     | Verken misliker eller liker | 460     | 9.8%    |
| 5     | Liker noe                   | 712     | 15.2%   |
| 6     | Liker mye                   | 422     | 9.0%    |
| 7     | Liker svært mye             | 135     | 2.9%    |
| 97    | Ikke svart                  | 92      | 2.0%    |

Advarsel: disse tallene indikerer antall enheter (cases) i datafilen. De kan ikke tolkes som oppsummert statistikk for populasjonen.

### # r7k6\_4: Liker/misliker: Venstre

|                                       |                                                                                                              |
|---------------------------------------|--------------------------------------------------------------------------------------------------------------|
| <b>Informasjon</b>                    | [Type= diskret] [Format=numeric] [Rekkevidde= 1-7] [Missing=*]                                               |
| <b>Statistikk [NW/ W]</b>             | [Gyldige=4689 /-] [Ugyldig=0 /-]                                                                             |
| <b>Tekst før spørsmål</b>             | Vi vil gjerne be deg vurdere hvor mye du liker eller misliker de ulike politiske partiene i Norge.           |
| <b>Spørsmålstekst</b>                 | Venstre                                                                                                      |
| <b>Instruksjoner til intervjueren</b> | [Alle respondenter spurt. ]                                                                                  |
| <b>Kommentarer</b>                    | Venstre (Vi vil gjerne be deg vurdere hvor mye du liker eller misliker de ulike politiske partiene i Norge.) |

## Fil : Norsk medborgerpanel - runde 7

### # r7k6\_4: Liker/misliker: Venstre

| Verdi | Merkelapp                   | Enheter | Prosent |
|-------|-----------------------------|---------|---------|
| 1     | Misliker svært mye          | 439     | 9.4%    |
| 2     | Misliker mye                | 643     | 13.7%   |
| 3     | Misliker noe                | 1011    | 21.6%   |
| 4     | Verken misliker eller liker | 1087    | 23.2%   |
| 5     | Liker noe                   | 1034    | 22.1%   |
| 6     | Liker mye                   | 326     | 7.0%    |
| 7     | Liker svært mye             | 53      | 1.1%    |
| 97    | Ikke svart                  | 96      | 2.0%    |

Advarsel: disse tallene indikerer antall enheter (cases) i datafilen. De kan ikke tolkes som oppsummert statistikk for populasjonen.

### # r7k6\_5: Liker/misliker: Sosialistisk Venstreparti

|                                |                                                                                                                           |
|--------------------------------|---------------------------------------------------------------------------------------------------------------------------|
| Informasjon                    | [Type= diskret] [Format=numeric] [Rekkevidde= 1-7] [Missing=*]                                                            |
| Statistikk [NW/ W]             | [Gyldige=4689 /-] [Ugyldig=0 /-]                                                                                          |
| Tekst før spørsmål             | Vi vil gjerne be deg vurdere hvor mye du liker eller misliker de ulike politiske partiene i Norge.                        |
| Spørsmålstekst                 | Sosialistisk Venstreparti                                                                                                 |
| Instruksjoner til intervjueren | [Alle respondenter spurt. ]                                                                                               |
| Kommentarer                    | Sosialistisk Venstreparti (Vi vil gjerne be deg vurdere hvor mye du liker eller misliker de ulike politiske partiene i No |

| Verdi | Merkelapp                   | Enheter | Prosent |
|-------|-----------------------------|---------|---------|
| 1     | Misliker svært mye          | 708     | 15.1%   |
| 2     | Misliker mye                | 844     | 18.0%   |
| 3     | Misliker noe                | 814     | 17.4%   |
| 4     | Verken misliker eller liker | 882     | 18.8%   |
| 5     | Liker noe                   | 850     | 18.1%   |
| 6     | Liker mye                   | 408     | 8.7%    |
| 7     | Liker svært mye             | 87      | 1.9%    |
| 97    | Ikke svart                  | 96      | 2.0%    |

Advarsel: disse tallene indikerer antall enheter (cases) i datafilen. De kan ikke tolkes som oppsummert statistikk for populasjonen.

### # r7k6\_6: Liker/misliker: Senterpartiet

|                                |                                                                                                                    |
|--------------------------------|--------------------------------------------------------------------------------------------------------------------|
| Informasjon                    | [Type= diskret] [Format=numeric] [Rekkevidde= 1-7] [Missing=*]                                                     |
| Statistikk [NW/ W]             | [Gyldige=4689 /-] [Ugyldig=0 /-]                                                                                   |
| Tekst før spørsmål             | Vi vil gjerne be deg vurdere hvor mye du liker eller misliker de ulike politiske partiene i Norge.                 |
| Spørsmålstekst                 | Senterpartiet                                                                                                      |
| Instruksjoner til intervjueren | [Alle respondenter spurt. ]                                                                                        |
| Kommentarer                    | Senterpartiet (Vi vil gjerne be deg vurdere hvor mye du liker eller misliker de ulike politiske partiene i Norge.) |

| Verdi | Merkelapp                   | Enheter | Prosent |
|-------|-----------------------------|---------|---------|
| 1     | Misliker svært mye          | 264     | 5.6%    |
| 2     | Misliker mye                | 559     | 11.9%   |
| 3     | Misliker noe                | 964     | 20.6%   |
| 4     | Verken misliker eller liker | 1497    | 31.9%   |
| 5     | Liker noe                   | 959     | 20.5%   |

## Fil : Norsk medborgerpanel - runde 7

### # r7k6\_6: Liker/misliker: Senterpartiet

| Verdi | Merkelapp       | Enheter | Prosent |
|-------|-----------------|---------|---------|
| 6     | Liker mye       | 299     | 6.4%    |
| 7     | Liker svært mye | 53      | 1.1%    |
| 97    | Ikke svart      | 94      | 2.0%    |

Advarsel: disse tallene indikerer antall enheter (cases) i datafilen. De kan ikke tolkes som oppsummert statistikk for populasjonen.

### # r7k6\_7: Liker/misliker: MDG

|                                |                                                                                                                         |
|--------------------------------|-------------------------------------------------------------------------------------------------------------------------|
| Informasjon                    | [Type= diskret] [Format=numeric] [Rekkevidde= 1-7] [Missing=*]                                                          |
| Statistikk [NW/ W]             | [Gyldige=4689 /-] [Ugyldig=0 /-]                                                                                        |
| Tekst før spørsmål             | Vi vil gjerne be deg vurdere hvor mye du liker eller misliker de ulike politiske partiene i Norge.                      |
| Spørsmålstekst                 | Miljøpartiet De Grønne                                                                                                  |
| Instruksjoner til intervjueren | [Alle respondenter spurt. ]                                                                                             |
| Kommentarer                    | Miljøpartiet De Grønne (Vi vil gjerne be deg vurdere hvor mye du liker eller misliker de ulike politiske partiene i Nor |

| Verdi | Merkelapp                   | Enheter | Prosent |
|-------|-----------------------------|---------|---------|
| 1     | Misliker svært mye          | 995     | 21.2%   |
| 2     | Misliker mye                | 729     | 15.5%   |
| 3     | Misliker noe                | 814     | 17.4%   |
| 4     | Verken misliker eller liker | 805     | 17.2%   |
| 5     | Liker noe                   | 874     | 18.6%   |
| 6     | Liker mye                   | 320     | 6.8%    |
| 7     | Liker svært mye             | 64      | 1.4%    |
| 97    | Ikke svart                  | 88      | 1.9%    |

Advarsel: disse tallene indikerer antall enheter (cases) i datafilen. De kan ikke tolkes som oppsummert statistikk for populasjonen.

### # r7k6\_8: Liker/misliker: AP

|                                |                                                                                                                      |
|--------------------------------|----------------------------------------------------------------------------------------------------------------------|
| Informasjon                    | [Type= diskret] [Format=numeric] [Rekkevidde= 1-7] [Missing=*]                                                       |
| Statistikk [NW/ W]             | [Gyldige=4689 /-] [Ugyldig=0 /-]                                                                                     |
| Tekst før spørsmål             | Vi vil gjerne be deg vurdere hvor mye du liker eller misliker de ulike politiske partiene i Norge.                   |
| Spørsmålstekst                 | Arbeiderpartiet                                                                                                      |
| Instruksjoner til intervjueren | [Alle respondenter spurt. ]                                                                                          |
| Kommentarer                    | Arbeiderpartiet (Vi vil gjerne be deg vurdere hvor mye du liker eller misliker de ulike politiske partiene i Norge.) |

| Verdi | Merkelapp                   | Enheter | Prosent |
|-------|-----------------------------|---------|---------|
| 1     | Misliker svært mye          | 142     | 3.0%    |
| 2     | Misliker mye                | 339     | 7.2%    |
| 3     | Misliker noe                | 716     | 15.3%   |
| 4     | Verken misliker eller liker | 640     | 13.6%   |
| 5     | Liker noe                   | 1357    | 28.9%   |
| 6     | Liker mye                   | 1167    | 24.9%   |
| 7     | Liker svært mye             | 247     | 5.3%    |
| 97    | Ikke svart                  | 81      | 1.7%    |

Advarsel: disse tallene indikerer antall enheter (cases) i datafilen. De kan ikke tolkes som oppsummert statistikk for populasjonen.



## Fil : Norsk medborgerpanel - runde 7

### # r7k6\_9: Liker/misliker: Rødt

|                                       |                                                                                                           |
|---------------------------------------|-----------------------------------------------------------------------------------------------------------|
| <b>Informasjon</b>                    | [Type= diskret] [Format=numeric] [Rekkevidde= 1-7] [Missing=*]                                            |
| <b>Statistikk [NW/ W]</b>             | [Gyldige=4689 /-] [Ugyldig=0 /-]                                                                          |
| <b>Tekst før spørsmål</b>             | Vi vil gjerne be deg vurdere hvor mye du liker eller misliker de ulike politiske partiene i Norge.        |
| <b>Spørsmålstekst</b>                 | Rødt                                                                                                      |
| <b>Instruksjoner til intervjueren</b> | [Alle respondenter spurt. ]                                                                               |
| <b>Kommentarer</b>                    | Rødt (Vi vil gjerne be deg vurdere hvor mye du liker eller misliker de ulike politiske partiene i Norge.) |

| Verdi | Merkelapp                   | Enheter | Prosent |
|-------|-----------------------------|---------|---------|
| 1     | Misliker svært mye          | 1097    | 23.4%   |
| 2     | Misliker mye                | 839     | 17.9%   |
| 3     | Misliker noe                | 714     | 15.2%   |
| 4     | Verken misliker eller liker | 1027    | 21.9%   |
| 5     | Liker noe                   | 617     | 13.2%   |
| 6     | Liker mye                   | 233     | 5.0%    |
| 7     | Liker svært mye             | 57      | 1.2%    |
| 97    | Ikke svart                  | 105     | 2.2%    |

Advarsel: disse tallene indikerer antall enheter (cases) i datafilen. De kan ikke tolkes som oppsummert statistikk for populasjonen.

### # r7k9\_1: [1] Viktigste politiske saker [anonymisert]

|                                       |                                                                                                                            |
|---------------------------------------|----------------------------------------------------------------------------------------------------------------------------|
| <b>Informasjon</b>                    | [Type= diskret] [Format=character] [Missing=*]                                                                             |
| <b>Statistikk [NW/ W]</b>             | [Gyldige=4689 /-] [Ugyldig=0 /-]                                                                                           |
| <b>Spørsmålstekst</b>                 | Hva er de viktigste politiske sakene eller saksfeltene for deg personlig?                                                  |
| <b>Tekst etter spørsmål</b>           | Vennligst list de tre viktigste sakene der 1 er den viktigste, 2 er den nest viktigste og 3 er den tredje viktigste saken. |
| <b>Instruksjoner til intervjueren</b> | [Alle respondenter spurt. ]<br>[Data tilbakeholdt av hensyn til anonymitet]                                                |

| Verdi | Merkelapp | Enheter | Prosent |
|-------|-----------|---------|---------|
|       |           | 4689    | 100.0%  |

Advarsel: disse tallene indikerer antall enheter (cases) i datafilen. De kan ikke tolkes som oppsummert statistikk for populasjonen.

### # r7k9\_2: [2] Viktigste politiske saker [anonymisert]

|                                       |                                                                                                                            |
|---------------------------------------|----------------------------------------------------------------------------------------------------------------------------|
| <b>Informasjon</b>                    | [Type= diskret] [Format=character] [Missing=*]                                                                             |
| <b>Statistikk [NW/ W]</b>             | [Gyldige=4689 /-] [Ugyldig=0 /-]                                                                                           |
| <b>Spørsmålstekst</b>                 | Hva er de viktigste politiske sakene eller saksfeltene for deg personlig?                                                  |
| <b>Tekst etter spørsmål</b>           | Vennligst list de tre viktigste sakene der 1 er den viktigste, 2 er den nest viktigste og 3 er den tredje viktigste saken. |
| <b>Instruksjoner til intervjueren</b> | [Alle respondenter spurt. ]<br>[Data tilbakeholdt av hensyn til anonymitet]                                                |

| Verdi | Merkelapp | Enheter | Prosent |
|-------|-----------|---------|---------|
|       |           | 4689    | 100.0%  |

Advarsel: disse tallene indikerer antall enheter (cases) i datafilen. De kan ikke tolkes som oppsummert statistikk for populasjonen.

### # r7k9\_3: [3] Viktigste politiske saker [anonymisert]

|                           |                                                |
|---------------------------|------------------------------------------------|
| <b>Informasjon</b>        | [Type= diskret] [Format=character] [Missing=*] |
| <b>Statistikk [NW/ W]</b> | [Gyldige=4689 /-] [Ugyldig=0 /-]               |

## Fil : Norsk medborgerpanel - runde 7

### # r7k9\_3: [3] Viktigste politiske saker [anonymisert]

|                                       |                                                                                                                            |
|---------------------------------------|----------------------------------------------------------------------------------------------------------------------------|
| <b>Spørsmålstekst</b>                 | Hva er de viktigste politiske sakene eller saksfeltene for deg personlig?                                                  |
| <b>Tekst etter spørsmål</b>           | Vennligst list de tre viktigste sakene der 1 er den viktigste, 2 er den nest viktigste og 3 er den tredje viktigste saken. |
| <b>Instruksjoner til intervjueren</b> | [Alle respondenter spurt. ]<br>[Data tilbakeholdt av hensyn til anonymitet]                                                |

| Verdi | Merkelapp | Enheter | Prosent |
|-------|-----------|---------|---------|
|       |           | 4689    | 100.0%  |

Advarsel: disse tallene indikerer antall enheter (cases) i datafilen. De kan ikke tolkes som oppsummert statistikk for populasjonen.

### # r7ocreasm\_mobil: R7OCRECSM\_mobil

|                                       |                                                                |
|---------------------------------------|----------------------------------------------------------------|
| <b>Informasjon</b>                    | [Type= diskret] [Format=numeric] [Rekkevidde= 0-1] [Missing=*] |
| <b>Statistikk [NW/ W]</b>             | [Gyldige=1199 /-] [Ugyldig=3490 /-]                            |
| <b>Instruksjoner til intervjueren</b> | [Informasjon om hvilken enhet respondenten bruker.]            |

| Verdi   | Merkelapp                | Enheter | Prosent |
|---------|--------------------------|---------|---------|
| 0       | Bruker ikke smarttelefon | 885     | 73.8%   |
| 1       | Bruker smarttelefon      | 314     | 26.2%   |
| Sysmiss |                          | 3490    |         |

Advarsel: disse tallene indikerer antall enheter (cases) i datafilen. De kan ikke tolkes som oppsummert statistikk for populasjonen.

### # r7ran20: [Randomiserer hvis u=2. ]

|                                       |                                                                |
|---------------------------------------|----------------------------------------------------------------|
| <b>Informasjon</b>                    | [Type= diskret] [Format=numeric] [Rekkevidde= 1-3] [Missing=*] |
| <b>Statistikk [NW/ W]</b>             | [Gyldige=1199 /-] [Ugyldig=3490 /-]                            |
| <b>Instruksjoner til intervjueren</b> | [Randomiserer hvis u=2. ]                                      |

| Verdi   | Merkelapp | Enheter | Prosent |
|---------|-----------|---------|---------|
| 1       | 1         | 372     | 31.0%   |
| 2       | 2         | 410     | 34.2%   |
| 3       | 3         | 417     | 34.8%   |
| Sysmiss |           | 3490    |         |

Advarsel: disse tallene indikerer antall enheter (cases) i datafilen. De kan ikke tolkes som oppsummert statistikk for populasjonen.

### # r7ocreasm1a1\_1: Hvor viktig er god utdanning i avgjørelsen om noen får bosette seg?

|                                       |                                                                                                                                               |
|---------------------------------------|-----------------------------------------------------------------------------------------------------------------------------------------------|
| <b>Informasjon</b>                    | [Type= diskret] [Format=numeric] [Rekkevidde= 1-5] [Missing=*]                                                                                |
| <b>Statistikk [NW/ W]</b>             | [Gyldige=4689 /-] [Ugyldig=0 /-]                                                                                                              |
| <b>Spørsmålstekst</b>                 | Hvor viktig synes du å ha en god utdanning bør være for å avgjøre om noen som er født, oppvokst og bor utenfor Norge skal få bosette seg her? |
| <b>Instruksjoner til intervjueren</b> | [Spurt hvis ran20=1 . ]<br>[Radioknapper blir brukt for å avgi svar.]                                                                         |
| <b>Kommentarer</b>                    | R7OCRECSM1A1_1 (Hvor viktig synes du å ha en god utdanning bør være for å avgjøre om noen som er født, oppvokst og                            |

| Verdi | Merkelapp            | Enheter | Prosent |
|-------|----------------------|---------|---------|
| 1     | Ikke i det hele tatt | 104     | 2.2%    |
| 2     | 2                    | 71      | 1.5%    |
| 3     | 3                    | 108     | 2.3%    |
| 4     | 4                    | 64      | 1.4%    |

## Fil : Norsk medborgerpanel - runde 7

### # r7ocrems1a1\_1: Hvor viktig er god utdanning i avgjørelsen om noen får bosette seg?

| Verdi | Merkelapp   | Enheter | Prosent |
|-------|-------------|---------|---------|
| 5     | Fullstendig | 20      | 0.4%    |
| 97    | Ikke svart  | 5       | 0.1%    |
| 98    | Ikke spurt  | 4317    | 92.1%   |

Advarsel: disse tallene indikerer antall enheter (cases) i datafilen. De kan ikke tolkes som oppsummert statistikk for populasjonen.

### # r7ocrems1a2\_1: Hvor viktig er kristen bakgrunn i avgjørelsen om noen får bosette seg?

|                                       |                                                                                                                    |
|---------------------------------------|--------------------------------------------------------------------------------------------------------------------|
| <b>Informasjon</b>                    | [Type= diskret] [Format=numeric] [Rekkevidde= 1-5] [Missing=*]                                                     |
| <b>Statistikk [NW/ W]</b>             | [Gyldige=4689 /-] [Ugyldig=0 /-]                                                                                   |
| <b>Spørsmålstekst</b>                 | Hvor viktig synes du en kristen bakgrunn bør være for å avgjøre om noen skal få bosette seg her?                   |
| <b>Instruksjoner til intervjueren</b> | [Spurt hvis ran20=1 . ]<br>[Radioknapper blir brukt for å avgi svar.]                                              |
| <b>Kommentarer</b>                    | R7OCRECSM1A2_1 (Hvor viktig synes du en kristen bakgrunn bør være for å avgjøre om noen skal få bosette seg her? ) |

| Verdi | Merkelapp            | Enheter | Prosent |
|-------|----------------------|---------|---------|
| 1     | Ikke i det hele tatt | 225     | 4.8%    |
| 2     | 2                    | 46      | 1.0%    |
| 3     | 3                    | 58      | 1.2%    |
| 4     | 4                    | 29      | 0.6%    |
| 5     | Fullstendig          | 10      | 0.2%    |
| 97    | Ikke svart           | 4       | 0.1%    |
| 98    | Ikke spurt           | 4317    | 92.1%   |

Advarsel: disse tallene indikerer antall enheter (cases) i datafilen. De kan ikke tolkes som oppsummert statistikk for populasjonen.

### # r7ocrems1a3\_1: Hvor viktig er kunnskaper/ferdigheter som Norge trenger i avgjørelsen om noen får bosette seg?

|                                       |                                                                                                                          |
|---------------------------------------|--------------------------------------------------------------------------------------------------------------------------|
| <b>Informasjon</b>                    | [Type= diskret] [Format=numeric] [Rekkevidde= 1-5] [Missing=*]                                                           |
| <b>Statistikk [NW/ W]</b>             | [Gyldige=4689 /-] [Ugyldig=0 /-]                                                                                         |
| <b>Spørsmålstekst</b>                 | Hvor viktig synes du kunnskaper og ferdigheter som Norge trenger bør være for å avgjøre om noen skal få bosette seg her? |
| <b>Instruksjoner til intervjueren</b> | [Spurt hvis ran20=1 . ]<br>[Radioknapper blir brukt for å avgi svar.]                                                    |
| <b>Kommentarer</b>                    | R7OCRECSM1A3_1 (Hvor viktig synes du kunnskaper og ferdigheter som Norge trenger bør være for å avgjøre om noen skal)    |

| Verdi | Merkelapp            | Enheter | Prosent |
|-------|----------------------|---------|---------|
| 1     | Ikke i det hele tatt | 75      | 1.6%    |
| 2     | 2                    | 77      | 1.6%    |
| 3     | 3                    | 97      | 2.1%    |
| 4     | 4                    | 96      | 2.0%    |
| 5     | Fullstendig          | 25      | 0.5%    |
| 97    | Ikke svart           | 2       | 0.0%    |
| 98    | Ikke spurt           | 4317    | 92.1%   |

Advarsel: disse tallene indikerer antall enheter (cases) i datafilen. De kan ikke tolkes som oppsummert statistikk for populasjonen.

### # r7ocrems1b1: Hvor viktig er god utdanning i avgjørelsen om noen får bosette seg?

|                           |                                                                 |
|---------------------------|-----------------------------------------------------------------|
| <b>Informasjon</b>        | [Type= diskret] [Format=numeric] [Rekkevidde= 0-50] [Missing=*] |
| <b>Statistikk [NW/ W]</b> | [Gyldige=4689 /-] [Ugyldig=0 /-]                                |

## Fil : Norsk medborgerpanel - runde 7

### # r7ocreasm1b1: Hvor viktig er god utdanning i avgjørelsen om noen får bosette seg?

|                                       |                                                                                                                                                                                                                         |
|---------------------------------------|-------------------------------------------------------------------------------------------------------------------------------------------------------------------------------------------------------------------------|
| <b>Spørsmålstekst</b>                 | Hvor viktig synes du å ha en god utdanning bør være for å avgjøre om noen som er født, oppvokst og bor utenfor Norge skal få bosette seg her?                                                                           |
| <b>Instruksjoner til intervjueren</b> | [Spurt hvis u=2, ran20=2 og R7OCRECSM_mobil=0. Versjon for PC -og nettbrettbrukere. Mobilbrukere blir spurt R7OCRECSM1B1_mobile.]<br><br>[Slider blir brukt for å avgi svar. Utgangsposisjonen er satt til verdien 25.] |
| <b>Kommentarer</b>                    | Hvor viktig synes du å ha en god utdanning bør være for å avgjøre om noen som er født, oppvokst og bor utenfor Norg                                                                                                     |

| Verdi | Merkelapp            | Enheter | Prosent |
|-------|----------------------|---------|---------|
| 0     | Ikke i det hele tatt | 33      | 0.7%    |
| 1     | 1                    | 6       | 0.1%    |
| 2     | 2                    | 8       | 0.2%    |
| 3     | 3                    | 3       | 0.1%    |
| 4     | 4                    | 5       | 0.1%    |
| 5     | 5                    | 1       | 0.0%    |
| 6     | 6                    | 2       | 0.0%    |
| 7     | 7                    | 8       | 0.2%    |
| 8     | 8                    | 1       | 0.0%    |
| 9     | 9                    | 4       | 0.1%    |
| 10    | 10                   | 0       |         |
| 11    | 11                   | 5       | 0.1%    |
| 12    | 12                   | 4       | 0.1%    |
| 13    | 13                   | 7       | 0.1%    |
| 14    | 14                   | 9       | 0.2%    |
| 15    | 15                   | 8       | 0.2%    |
| 16    | 16                   | 3       | 0.1%    |
| 17    | 17                   | 6       | 0.1%    |
| 18    | 18                   | 2       | 0.0%    |
| 19    | 19                   | 7       | 0.1%    |
| 20    | 20                   | 5       | 0.1%    |
| 21    | 21                   | 3       | 0.1%    |
| 22    | 22                   | 3       | 0.1%    |
| 23    | 23                   | 4       | 0.1%    |
| 24    | 24                   | 6       | 0.1%    |
| 25    | 25                   | 38      | 0.8%    |
| 26    | 26                   | 3       | 0.1%    |
| 27    | 27                   | 4       | 0.1%    |
| 28    | 28                   | 10      | 0.2%    |
| 29    | 29                   | 8       | 0.2%    |
| 30    | 30                   | 7       | 0.1%    |
| 31    | 31                   | 7       | 0.1%    |
| 32    | 32                   | 5       | 0.1%    |
| 33    | 33                   | 5       | 0.1%    |
| 34    | 34                   | 4       | 0.1%    |
| 35    | 35                   | 12      | 0.3%    |
| 36    | 36                   | 9       | 0.2%    |

## Fil : Norsk medborgerpanel - runde 7

### # r7ocreasm1b1: Hvor viktig er god utdanning i avgjørelsen om noen får bosette seg?

| Verdi | Merkelapp   | Enheter | Prosent |
|-------|-------------|---------|---------|
| 37    | 37          | 6       | 0.1%    |
| 38    | 38          | 5       | 0.1%    |
| 39    | 39          | 2       | 0.0%    |
| 40    | 40          | 4       | 0.1%    |
| 41    | 41          | 4       | 0.1%    |
| 42    | 42          | 3       | 0.1%    |
| 43    | 43          | 4       | 0.1%    |
| 44    | 44          | 3       | 0.1%    |
| 45    | 45          | 1       | 0.0%    |
| 46    | 46          | 2       | 0.0%    |
| 47    | 47          | 3       | 0.1%    |
| 48    | 48          | 0       |         |
| 49    | 49          | 1       | 0.0%    |
| 50    | Fullstendig | 7       | 0.1%    |
| 97    | Ikke svart  | 0       |         |
| 98    | Ikke spurt  | 4389    | 93.6%   |

Advarsel: disse tallene indikerer antall enheter (cases) i datafilen. De kan ikke tolkes som oppsummert statistikk for populasjonen.

### # r7ocreasm1b1\_mobile: Hvor viktig er god utdanning i avgjørelsen om noen får bosette seg?

|                                       |                                                                                                                                                                                                                                      |
|---------------------------------------|--------------------------------------------------------------------------------------------------------------------------------------------------------------------------------------------------------------------------------------|
| <b>Informasjon</b>                    | [Type= diskret] [Format=numeric] [Rekkevidde= 0-50] [Missing=*]                                                                                                                                                                      |
| <b>Statistikk [NW/ W]</b>             | [Gyldige=4689 /-] [Ugyldig=0 /-]                                                                                                                                                                                                     |
| <b>Spørsmålstekst</b>                 | Hvor viktig synes du å ha en god utdanning bør være for å avgjøre om noen som er født, oppvokst og bor utenfor Norge skal få bosette seg her?                                                                                        |
| <b>Instruksjoner til intervjueren</b> | [Spurt hvis u=2, ran20=2 og R7OCRECSM_mobil=1. Versjon for mobilbrukere på grunn av oppsett. PC- og nettbrettbrukere blir spurt R7OCRECSM1B1.]<br><br>[Slider blir brukt for å avgi svar. Utgangsposisjonen er satt til verdien 25.] |
| <b>Kommentarer</b>                    | Hvor viktig synes du å ha en god utdanning bør være for å avgjøre om noen som er født, oppvokst og bor utenfor Norg                                                                                                                  |

| Verdi | Merkelapp            | Enheter | Prosent |
|-------|----------------------|---------|---------|
| 0     | Ikke i det hele tatt | 13      | 0.3%    |
| 1     | 1                    | 0       |         |
| 2     | 2                    | 2       | 0.0%    |
| 3     | 3                    | 0       |         |
| 4     | 4                    | 3       | 0.1%    |
| 5     | 5                    | 2       | 0.0%    |
| 6     | 6                    | 5       | 0.1%    |
| 7     | 7                    | 1       | 0.0%    |
| 8     | 8                    | 2       | 0.0%    |
| 9     | 9                    | 2       | 0.0%    |
| 10    | 10                   | 3       | 0.1%    |
| 11    | 11                   | 2       | 0.0%    |
| 12    | 12                   | 1       | 0.0%    |
| 13    | 13                   | 3       | 0.1%    |
| 14    | 14                   | 2       | 0.0%    |
| 15    | 15                   | 4       | 0.1%    |

## Fil : Norsk medborgerpanel - runde 7

### # r7ocreasm1b1\_mobile: Hvor viktig er god utdanning i avgjørelsen om noen får bosette seg?

| Verdi | Merkelapp   | Enheter | Prosent |
|-------|-------------|---------|---------|
| 16    | 16          | 1       | 0.0%    |
| 17    | 17          | 0       |         |
| 18    | 18          | 0       |         |
| 19    | 19          | 0       |         |
| 20    | 20          | 3       | 0.1%    |
| 21    | 21          | 4       | 0.1%    |
| 22    | 22          | 1       | 0.0%    |
| 23    | 23          | 0       |         |
| 24    | 24          | 0       |         |
| 25    | 25          | 15      | 0.3%    |
| 26    | 26          | 0       |         |
| 27    | 27          | 3       | 0.1%    |
| 28    | 28          | 1       | 0.0%    |
| 29    | 29          | 0       |         |
| 30    | 30          | 2       | 0.0%    |
| 31    | 31          | 1       | 0.0%    |
| 32    | 32          | 1       | 0.0%    |
| 33    | 33          | 0       |         |
| 34    | 34          | 2       | 0.0%    |
| 35    | 35          | 1       | 0.0%    |
| 36    | 36          | 3       | 0.1%    |
| 37    | 37          | 2       | 0.0%    |
| 38    | 38          | 3       | 0.1%    |
| 39    | 39          | 1       | 0.0%    |
| 40    | 40          | 2       | 0.0%    |
| 41    | 41          | 2       | 0.0%    |
| 42    | 42          | 3       | 0.1%    |
| 43    | 43          | 0       |         |
| 44    | 44          | 0       |         |
| 45    | 45          | 4       | 0.1%    |
| 46    | 46          | 1       | 0.0%    |
| 47    | 47          | 0       |         |
| 48    | 48          | 2       | 0.0%    |
| 49    | 49          | 1       | 0.0%    |
| 50    | Fullstendig | 6       | 0.1%    |
| 97    | Ikke svart  | 0       |         |
| 98    | Ikke spurt  | 4579    | 97.7%   |

Advarsel: disse tallene indikerer antall enheter (cases) i datafilen. De kan ikke tolkes som oppsummert statistikk for populasjonen.

### # r7ocreasm1b2: Hvor viktig er kristen bakgrunn i avgjørelsen om noen får bosette seg?

|                    |                                                                                                  |
|--------------------|--------------------------------------------------------------------------------------------------|
| Informasjon        | [Type= diskret] [Format=numeric] [Rekkevidde= 0-50] [Missing=*]                                  |
| Statistikk [NW/ W] | [Gyldige=4689 /-] [Ugyldig=0 /-]                                                                 |
| Spørsmålstekst     | Hvor viktig synes du en kristen bakgrunn bør være for å avgjøre om noen skal få bosette seg her? |

## Fil : Norsk medborgerpanel - runde 7

### # r7ocreasm1b2: Hvor viktig er kristen bakgrunn i avgjørelsen om noen får bosette seg?

|                                       |                                                                                                                                                                                                                         |
|---------------------------------------|-------------------------------------------------------------------------------------------------------------------------------------------------------------------------------------------------------------------------|
| <b>Instruksjoner til intervjueren</b> | [Spurt hvis u=2, ran20=2 og R7OCRECSM_mobil=0. Versjon for PC -og nettbrettbrukere. Mobilbrukere blir spurt R7OCRECSM1B2_mobile.]<br><br>[Slider blir brukt for å avgi svar. Utgangsposisjonen er satt til verdien 25.] |
| <b>Kommentarer</b>                    | Hvor viktig synes du en kristen bakgrunn bør være for å avgjøre om noen skal få bosette seg her? ^f(R7OCRECSM_skal                                                                                                      |

| Verdi | Merkelapp            | Enheter | Prosent |
|-------|----------------------|---------|---------|
| 0     | Ikke i det hele tatt | 117     | 2.5%    |
| 1     | 1                    | 6       | 0.1%    |
| 2     | 2                    | 8       | 0.2%    |
| 3     | 3                    | 6       | 0.1%    |
| 4     | 4                    | 7       | 0.1%    |
| 5     | 5                    | 5       | 0.1%    |
| 6     | 6                    | 5       | 0.1%    |
| 7     | 7                    | 6       | 0.1%    |
| 8     | 8                    | 3       | 0.1%    |
| 9     | 9                    | 12      | 0.3%    |
| 10    | 10                   | 3       | 0.1%    |
| 11    | 11                   | 6       | 0.1%    |
| 12    | 12                   | 3       | 0.1%    |
| 13    | 13                   | 8       | 0.2%    |
| 14    | 14                   | 6       | 0.1%    |
| 15    | 15                   | 4       | 0.1%    |
| 16    | 16                   | 5       | 0.1%    |
| 17    | 17                   | 2       | 0.0%    |
| 18    | 18                   | 2       | 0.0%    |
| 19    | 19                   | 3       | 0.1%    |
| 20    | 20                   | 2       | 0.0%    |
| 21    | 21                   | 4       | 0.1%    |
| 22    | 22                   | 1       | 0.0%    |
| 23    | 23                   | 4       | 0.1%    |
| 24    | 24                   | 4       | 0.1%    |
| 25    | 25                   | 32      | 0.7%    |
| 26    | 26                   | 2       | 0.0%    |
| 27    | 27                   | 1       | 0.0%    |
| 28    | 28                   | 2       | 0.0%    |
| 29    | 29                   | 1       | 0.0%    |
| 30    | 30                   | 3       | 0.1%    |
| 31    | 31                   | 2       | 0.0%    |
| 32    | 32                   | 1       | 0.0%    |
| 33    | 33                   | 2       | 0.0%    |
| 34    | 34                   | 3       | 0.1%    |
| 35    | 35                   | 2       | 0.0%    |
| 36    | 36                   | 1       | 0.0%    |
| 37    | 37                   | 3       | 0.1%    |
| 38    | 38                   | 1       | 0.0%    |

## Fil : Norsk medborgerpanel - runde 7

### # r7ocreasm1b2: Hvor viktig er kristen bakgrunn i avgjørelsen om noen får bosette seg?

| Verdi | Merkelapp   | Enheter | Prosent |
|-------|-------------|---------|---------|
| 39    | 39          | 1       | 0.0%    |
| 40    | 40          | 2       | 0.0%    |
| 41    | 41          | 0       |         |
| 42    | 42          | 2       | 0.0%    |
| 43    | 43          | 1       | 0.0%    |
| 44    | 44          | 0       |         |
| 45    | 45          | 0       |         |
| 46    | 46          | 0       |         |
| 47    | 47          | 0       |         |
| 48    | 48          | 0       |         |
| 49    | 49          | 1       | 0.0%    |
| 50    | Fullstendig | 5       | 0.1%    |
| 97    | Ikke svart  | 0       |         |
| 98    | Ikke spurt  | 4389    | 93.6%   |

Advarsel: disse tallene indikerer antall enheter (cases) i datafilen. De kan ikke tolkes som oppsummert statistikk for populasjonen.

### # r7ocreasm1b2\_mobile: Hvor viktig er kristen bakgrunn i avgjørelsen om noen får bosette seg?

|                                |                                                                                                                                                                                                                                      |
|--------------------------------|--------------------------------------------------------------------------------------------------------------------------------------------------------------------------------------------------------------------------------------|
| Informasjon                    | [Type= diskret] [Format=numeric] [Rekkevidde= 0-50] [Missing=*]                                                                                                                                                                      |
| Statistikk [NW/ W]             | [Gyldige=4689 /-] [Ugyldig=0 /-]                                                                                                                                                                                                     |
| Spørsmålstekst                 | Hvor viktig synes du en kristen bakgrunn bør være for å avgjøre om noen skal få bosette seg her?                                                                                                                                     |
| Instruksjoner til intervjueren | [Spurt hvis u=2, ran20=2 og R7OCRECSM_mobil=1. Versjon for mobilbrukere på grunn av oppsett. PC- og nettbrettbrukere blir spurt R7OCRECSM1B2.]<br><br>[Slider blir brukt for å avgi svar. Utgangsposisjonen er satt til verdien 25.] |
| Kommentarer                    | Hvor viktig synes du en kristen bakgrunn bør være for å avgjøre om noen skal få bosette seg her?                                                                                                                                     |

| Verdi | Merkelapp            | Enheter | Prosent |
|-------|----------------------|---------|---------|
| 0     | Ikke i det hele tatt | 39      | 0.8%    |
| 1     | 1                    | 5       | 0.1%    |
| 2     | 2                    | 1       | 0.0%    |
| 3     | 3                    | 2       | 0.0%    |
| 4     | 4                    | 5       | 0.1%    |
| 5     | 5                    | 1       | 0.0%    |
| 6     | 6                    | 3       | 0.1%    |
| 7     | 7                    | 0       |         |
| 8     | 8                    | 1       | 0.0%    |
| 9     | 9                    | 1       | 0.0%    |
| 10    | 10                   | 3       | 0.1%    |
| 11    | 11                   | 1       | 0.0%    |
| 12    | 12                   | 3       | 0.1%    |
| 13    | 13                   | 2       | 0.0%    |
| 14    | 14                   | 2       | 0.0%    |
| 15    | 15                   | 0       |         |
| 16    | 16                   | 2       | 0.0%    |
| 17    | 17                   | 1       | 0.0%    |



## Fil : Norsk medborgerpanel - runde 7

### # r7ocreasm1b2\_mobile: Hvor viktig er kristen bakgrunn i avgjørelsen om noen får bosette seg?

| Verdi | Merkelapp   | Enheter | Prosent |
|-------|-------------|---------|---------|
| 18    | 18          | 0       |         |
| 19    | 19          | 0       |         |
| 20    | 20          | 0       |         |
| 21    | 21          | 2       | 0.0%    |
| 22    | 22          | 0       |         |
| 23    | 23          | 0       |         |
| 24    | 24          | 0       |         |
| 25    | 25          | 20      | 0.4%    |
| 26    | 26          | 1       | 0.0%    |
| 27    | 27          | 0       |         |
| 28    | 28          | 1       | 0.0%    |
| 29    | 29          | 0       |         |
| 30    | 30          | 2       | 0.0%    |
| 31    | 31          | 1       | 0.0%    |
| 32    | 32          | 0       |         |
| 33    | 33          | 0       |         |
| 34    | 34          | 0       |         |
| 35    | 35          | 0       |         |
| 36    | 36          | 0       |         |
| 37    | 37          | 1       | 0.0%    |
| 38    | 38          | 2       | 0.0%    |
| 39    | 39          | 0       |         |
| 40    | 40          | 2       | 0.0%    |
| 41    | 41          | 1       | 0.0%    |
| 42    | 42          | 0       |         |
| 43    | 43          | 1       | 0.0%    |
| 44    | 44          | 2       | 0.0%    |
| 45    | 45          | 0       |         |
| 46    | 46          | 0       |         |
| 47    | 47          | 0       |         |
| 48    | 48          | 0       |         |
| 49    | 49          | 1       | 0.0%    |
| 50    | Fullstendig | 1       | 0.0%    |
| 97    | Ikke svart  | 0       |         |
| 98    | Ikke spurt  | 4579    | 97.7%   |

Advarsel: disse tallene indikerer antall enheter (cases) i datafilen. De kan ikke tolkes som oppsummert statistikk for populasjonen.

### # r7ocreasm1b3: Hvor viktig er kunnskaper/ferdigheter som Norge trenger i avgjørelsen om noen får bosette seg?

|                                       |                                                                                                                                                                                                                         |
|---------------------------------------|-------------------------------------------------------------------------------------------------------------------------------------------------------------------------------------------------------------------------|
| <b>Informasjon</b>                    | [Type= diskret] [Format=numeric] [Rekkevidde= 0-50] [Missing=*]                                                                                                                                                         |
| <b>Statistikk [NW/ W]</b>             | [Gyldige=4689 /-] [Ugyldig=0 /-]                                                                                                                                                                                        |
| <b>Spørsmålstekst</b>                 | Hvor viktig synes du kunnskaper og ferdigheter som Norge trenger bør være for å avgjøre om noen skal få bosette seg her?                                                                                                |
| <b>Instruksjoner til intervjueren</b> | [Spurt hvis u=2, ran20=2 og R7OCRECSM_mobil=0. Versjon for PC -og nettbrettbrukere. Mobilbrukere blir spurt R7OCRECSM1B3_mobile.]<br><br>[Slider blir brukt for å avgi svar. Utgangsposisjonen er satt til verdien 25.] |

## Fil : Norsk medborgerpanel - runde 7

# r7ocrecsm1b3: Hvor viktig er kunnskaper/ferdigheter som Norge trenger i avgjørelsen om noen får bosette seg?

**Kommentarer** Hvor viktig synes du kunnskaper og ferdigheter som Norge trenger bør være for å avgjøre om noen skal få bosette seg

| Verdi | Merkelapp            | Enheter | Prosent |
|-------|----------------------|---------|---------|
| 0     | Ikke i det hele tatt | 22      | 0.5%    |
| 1     | 1                    | 0       |         |
| 2     | 2                    | 1       | 0.0%    |
| 3     | 3                    | 4       | 0.1%    |
| 4     | 4                    | 5       | 0.1%    |
| 5     | 5                    | 3       | 0.1%    |
| 6     | 6                    | 3       | 0.1%    |
| 7     | 7                    | 6       | 0.1%    |
| 8     | 8                    | 4       | 0.1%    |
| 9     | 9                    | 4       | 0.1%    |
| 10    | 10                   | 2       | 0.0%    |
| 11    | 11                   | 5       | 0.1%    |
| 12    | 12                   | 7       | 0.1%    |
| 13    | 13                   | 10      | 0.2%    |
| 14    | 14                   | 0       |         |
| 15    | 15                   | 5       | 0.1%    |
| 16    | 16                   | 3       | 0.1%    |
| 17    | 17                   | 8       | 0.2%    |
| 18    | 18                   | 4       | 0.1%    |
| 19    | 19                   | 2       | 0.0%    |
| 20    | 20                   | 1       | 0.0%    |
| 21    | 21                   | 1       | 0.0%    |
| 22    | 22                   | 1       | 0.0%    |
| 23    | 23                   | 2       | 0.0%    |
| 24    | 24                   | 7       | 0.1%    |
| 25    | 25                   | 45      | 1.0%    |
| 26    | 26                   | 1       | 0.0%    |
| 27    | 27                   | 5       | 0.1%    |
| 28    | 28                   | 6       | 0.1%    |
| 29    | 29                   | 6       | 0.1%    |
| 30    | 30                   | 12      | 0.3%    |
| 31    | 31                   | 7       | 0.1%    |
| 32    | 32                   | 7       | 0.1%    |
| 33    | 33                   | 5       | 0.1%    |
| 34    | 34                   | 12      | 0.3%    |
| 35    | 35                   | 10      | 0.2%    |
| 36    | 36                   | 14      | 0.3%    |
| 37    | 37                   | 7       | 0.1%    |
| 38    | 38                   | 8       | 0.2%    |
| 39    | 39                   | 7       | 0.1%    |
| 40    | 40                   | 7       | 0.1%    |
| 41    | 41                   | 3       | 0.1%    |

## Fil : Norsk medborgerpanel - runde 7

### # r7ocreasm1b3: Hvor viktig er kunnskaper/ferdigheter som Norge trenger i avgjørelsen om noen får bosette seg?

| Verdi | Merkelapp   | Enheter | Prosent |
|-------|-------------|---------|---------|
| 42    | 42          | 3       | 0.1%    |
| 43    | 43          | 2       | 0.0%    |
| 44    | 44          | 1       | 0.0%    |
| 45    | 45          | 4       | 0.1%    |
| 46    | 46          | 2       | 0.0%    |
| 47    | 47          | 3       | 0.1%    |
| 48    | 48          | 1       | 0.0%    |
| 49    | 49          | 2       | 0.0%    |
| 50    | Fullstendig | 10      | 0.2%    |
| 97    | Ikke svart  | 0       |         |
| 98    | Ikke spurt  | 4389    | 93.6%   |

Advarsel: disse tallene indikerer antall enheter (cases) i datafilen. De kan ikke tolkes som oppsummert statistikk for populasjonen.

### # r7ocreasm1b3\_mobile: Hvor viktig er kunnskaper/ferdigheter som Norge trenger i avgjørelsen om noen får bosette seg?

|                                       |                                                                                                                                                                                                                                      |
|---------------------------------------|--------------------------------------------------------------------------------------------------------------------------------------------------------------------------------------------------------------------------------------|
| <b>Informasjon</b>                    | [Type= diskret] [Format=numeric] [Rekkevidde= 0-50] [Missing=*]                                                                                                                                                                      |
| <b>Statistikk [NW/ W]</b>             | [Gyldige=4689 /-] [Ugyldig=0 /-]                                                                                                                                                                                                     |
| <b>Spørsmålstekst</b>                 | Hvor viktig synes du kunnskaper og ferdigheter som Norge trenger bør være for å avgjøre om noen skal få bosette seg her?                                                                                                             |
| <b>Instruksjoner til intervjueren</b> | [Spurt hvis u=2, ran20=2 og R7OCRECSM_mobil=1. Versjon for mobilbrukere på grunn av oppsett. PC- og nettbrettbrukere blir spurt R7OCRECSM1B3.]<br><br>[Slider blir brukt for å avgi svar. Utgangsposisjonen er satt til verdien 25.] |
| <b>Kommentarer</b>                    | Hvor viktig synes du kunnskaper og ferdigheter som Norge trenger bør være for å avgjøre om noen skal få bosette seg                                                                                                                  |

| Verdi | Merkelapp            | Enheter | Prosent |
|-------|----------------------|---------|---------|
| 0     | Ikke i det hele tatt | 7       | 0.1%    |
| 1     | 1                    | 1       | 0.0%    |
| 2     | 2                    | 0       |         |
| 3     | 3                    | 0       |         |
| 4     | 4                    | 2       | 0.0%    |
| 5     | 5                    | 2       | 0.0%    |
| 6     | 6                    | 2       | 0.0%    |
| 7     | 7                    | 3       | 0.1%    |
| 8     | 8                    | 3       | 0.1%    |
| 9     | 9                    | 1       | 0.0%    |
| 10    | 10                   | 2       | 0.0%    |
| 11    | 11                   | 2       | 0.0%    |
| 12    | 12                   | 1       | 0.0%    |
| 13    | 13                   | 1       | 0.0%    |
| 14    | 14                   | 1       | 0.0%    |
| 15    | 15                   | 3       | 0.1%    |
| 16    | 16                   | 1       | 0.0%    |
| 17    | 17                   | 0       |         |
| 18    | 18                   | 0       |         |
| 19    | 19                   | 0       |         |

## Fil : Norsk medborgerpanel - runde 7

# r7ocreasm1b3\_mobile: Hvor viktig er kunnskaper/ferdigheter som Norge trenger i avgjørelsen om noen får bosette seg?

| Verdi | Merkelapp   | Enheter | Prosent |
|-------|-------------|---------|---------|
| 20    | 20          | 1       | 0.0%    |
| 21    | 21          | 2       | 0.0%    |
| 22    | 22          | 0       |         |
| 23    | 23          | 0       |         |
| 24    | 24          | 1       | 0.0%    |
| 25    | 25          | 21      | 0.4%    |
| 26    | 26          | 3       | 0.1%    |
| 27    | 27          | 0       |         |
| 28    | 28          | 3       | 0.1%    |
| 29    | 29          | 1       | 0.0%    |
| 30    | 30          | 2       | 0.0%    |
| 31    | 31          | 1       | 0.0%    |
| 32    | 32          | 0       |         |
| 33    | 33          | 0       |         |
| 34    | 34          | 2       | 0.0%    |
| 35    | 35          | 1       | 0.0%    |
| 36    | 36          | 2       | 0.0%    |
| 37    | 37          | 2       | 0.0%    |
| 38    | 38          | 4       | 0.1%    |
| 39    | 39          | 1       | 0.0%    |
| 40    | 40          | 2       | 0.0%    |
| 41    | 41          | 1       | 0.0%    |
| 42    | 42          | 1       | 0.0%    |
| 43    | 43          | 1       | 0.0%    |
| 44    | 44          | 3       | 0.1%    |
| 45    | 45          | 3       | 0.1%    |
| 46    | 46          | 2       | 0.0%    |
| 47    | 47          | 7       | 0.1%    |
| 48    | 48          | 1       | 0.0%    |
| 49    | 49          | 1       | 0.0%    |
| 50    | Fullstendig | 9       | 0.2%    |
| 97    | Ikke svart  | 0       |         |
| 98    | Ikke spurt  | 4579    | 97.7%   |

Advarsel: disse tallene indikerer antall enheter (cases) i datafilen. De kan ikke tolkes som oppsummert statistikk for populasjonen.

# r7ocreasm1c1: Hvor viktig er god utdanning i avgjørelsen om noen får bosette seg?

|                                |                                                                                                                                                                                                                        |
|--------------------------------|------------------------------------------------------------------------------------------------------------------------------------------------------------------------------------------------------------------------|
| Informasjon                    | [Type= diskret] [Format=numeric] [Rekkevidde= 0-50] [Missing=*]                                                                                                                                                        |
| Statistikk [NW/ W]             | [Gyldige=4689 /-] [Ugyldig=0 /-]                                                                                                                                                                                       |
| Spørsmålstekst                 | Hvor viktig synes du å ha en god utdanning bør være for å avgjøre om noen som er født, oppvokst og bor utenfor Norge skal få bosette seg her?                                                                          |
| Instruksjoner til intervjueren | [Spurt hvis u=2, ran20=3 og R7OCRECSM_mobil=0. Versjon for PC -og nettbrettbrukere. Mobilbrukere blir spurt R7OCRECSM1C1_mobile.]<br><br>[Slider blir brukt for å avgi svar. Utgangsposisjonen er satt til verdien 1.] |

## Fil : Norsk medborgerpanel - runde 7

# r7ocrecsm1c1: Hvor viktig er god utdanning i avgjørelsen om noen får bosette seg?

**Kommentarer** Hvor viktig synes du å ha en god utdanning bør være for å avgjøre om noen som er født, oppvokst og bor utenfor Norg

| Verdi | Merkelapp            | Enheter | Prosent |
|-------|----------------------|---------|---------|
| 0     | Ikke i det hele tatt | 16      | 0.3%    |
| 1     | 1                    | 65      | 1.4%    |
| 2     | 2                    | 7       | 0.1%    |
| 3     | 3                    | 7       | 0.1%    |
| 4     | 4                    | 2       | 0.0%    |
| 5     | 5                    | 5       | 0.1%    |
| 6     | 6                    | 4       | 0.1%    |
| 7     | 7                    | 1       | 0.0%    |
| 8     | 8                    | 2       | 0.0%    |
| 9     | 9                    | 4       | 0.1%    |
| 10    | 10                   | 10      | 0.2%    |
| 11    | 11                   | 3       | 0.1%    |
| 12    | 12                   | 6       | 0.1%    |
| 13    | 13                   | 11      | 0.2%    |
| 14    | 14                   | 3       | 0.1%    |
| 15    | 15                   | 0       |         |
| 16    | 16                   | 2       | 0.0%    |
| 17    | 17                   | 3       | 0.1%    |
| 18    | 18                   | 4       | 0.1%    |
| 19    | 19                   | 2       | 0.0%    |
| 20    | 20                   | 2       | 0.0%    |
| 21    | 21                   | 0       |         |
| 22    | 22                   | 0       |         |
| 23    | 23                   | 3       | 0.1%    |
| 24    | 24                   | 22      | 0.5%    |
| 25    | 25                   | 34      | 0.7%    |
| 26    | 26                   | 3       | 0.1%    |
| 27    | 27                   | 5       | 0.1%    |
| 28    | 28                   | 3       | 0.1%    |
| 29    | 29                   | 6       | 0.1%    |
| 30    | 30                   | 4       | 0.1%    |
| 31    | 31                   | 2       | 0.0%    |
| 32    | 32                   | 4       | 0.1%    |
| 33    | 33                   | 6       | 0.1%    |
| 34    | 34                   | 7       | 0.1%    |
| 35    | 35                   | 2       | 0.0%    |
| 36    | 36                   | 5       | 0.1%    |
| 37    | 37                   | 6       | 0.1%    |
| 38    | 38                   | 7       | 0.1%    |
| 39    | 39                   | 5       | 0.1%    |
| 40    | 40                   | 3       | 0.1%    |
| 41    | 41                   | 1       | 0.0%    |

## Fil : Norsk medborgerpanel - runde 7

### # r7ocreasm1c1: Hvor viktig er god utdanning i avgjørelsen om noen får bosette seg?

| Verdi | Merkelapp   | Enheter | Prosent |
|-------|-------------|---------|---------|
| 42    | 42          | 2       | 0.0%    |
| 43    | 43          | 1       | 0.0%    |
| 44    | 44          | 2       | 0.0%    |
| 45    | 45          | 0       |         |
| 46    | 46          | 0       |         |
| 47    | 47          | 1       | 0.0%    |
| 48    | 48          | 1       | 0.0%    |
| 49    | 49          | 0       |         |
| 50    | Fullstendig | 11      | 0.2%    |
| 97    | Ikke svart  | 0       |         |
| 98    | Ikke spurt  | 4384    | 93.5%   |

Advarsel: disse tallene indikerer antall enheter (cases) i datafilen. De kan ikke tolkes som oppsummert statistikk for populasjonen.

### # r7ocreasm1c1\_mobile: Hvor viktig er god utdanning i avgjørelsen om noen får bosette seg?

|                                       |                                                                                                                                                                                                                                     |
|---------------------------------------|-------------------------------------------------------------------------------------------------------------------------------------------------------------------------------------------------------------------------------------|
| <b>Informasjon</b>                    | [Type= diskret] [Format=numeric] [Rekkevidde= 0-50] [Missing=*]                                                                                                                                                                     |
| <b>Statistikk [NW/ W]</b>             | [Gyldige=4689 /-] [Ugyldig=0 /-]                                                                                                                                                                                                    |
| <b>Spørsmålstekst</b>                 | Hvor viktig synes du å ha en god utdanning bør være for å avgjøre om noen som er født, oppvokst og bor utenfor Norge skal få bosette seg her?                                                                                       |
| <b>Instruksjoner til intervjueren</b> | [Spurt hvis u=2, ran20=3 og R7OCRECSM_mobil=1. Versjon for mobilbrukere på grunn av oppsett. PC- og nettbrettbrukere blir spurt R7OCRECSM1C1.]<br><br>[Slider blir brukt for å avgi svar. Utgangsposisjonen er satt til verdien 1.] |
| <b>Kommentarer</b>                    | Hvor viktig synes du å ha en god utdanning bør være for å avgjøre om noen som er født, oppvokst og bor utenfor Norg                                                                                                                 |

| Verdi | Merkelapp            | Enheter | Prosent |
|-------|----------------------|---------|---------|
| 0     | Ikke i det hele tatt | 6       | 0.1%    |
| 1     | 1                    | 26      | 0.6%    |
| 2     | 2                    | 3       | 0.1%    |
| 3     | 3                    | 1       | 0.0%    |
| 4     | 4                    | 3       | 0.1%    |
| 5     | 5                    | 5       | 0.1%    |
| 6     | 6                    | 2       | 0.0%    |
| 7     | 7                    | 0       |         |
| 8     | 8                    | 3       | 0.1%    |
| 9     | 9                    | 0       |         |
| 10    | 10                   | 2       | 0.0%    |
| 11    | 11                   | 2       | 0.0%    |
| 12    | 12                   | 0       |         |
| 13    | 13                   | 1       | 0.0%    |
| 14    | 14                   | 2       | 0.0%    |
| 15    | 15                   | 3       | 0.1%    |
| 16    | 16                   | 2       | 0.0%    |
| 17    | 17                   | 1       | 0.0%    |
| 18    | 18                   | 1       | 0.0%    |
| 19    | 19                   | 0       |         |
| 20    | 20                   | 0       |         |

## Fil : Norsk medborgerpanel - runde 7

### # r7ocreasm1c1\_mobile: Hvor viktig er god utdanning i avgjørelsen om noen får bosette seg?

| Verdi | Merkelapp   | Enheter | Prosent |
|-------|-------------|---------|---------|
| 21    | 21          | 0       |         |
| 22    | 22          | 0       |         |
| 23    | 23          | 1       | 0.0%    |
| 24    | 24          | 2       | 0.0%    |
| 25    | 25          | 3       | 0.1%    |
| 26    | 26          | 2       | 0.0%    |
| 27    | 27          | 1       | 0.0%    |
| 28    | 28          | 1       | 0.0%    |
| 29    | 29          | 1       | 0.0%    |
| 30    | 30          | 5       | 0.1%    |
| 31    | 31          | 2       | 0.0%    |
| 32    | 32          | 0       |         |
| 33    | 33          | 3       | 0.1%    |
| 34    | 34          | 1       | 0.0%    |
| 35    | 35          | 1       | 0.0%    |
| 36    | 36          | 2       | 0.0%    |
| 37    | 37          | 1       | 0.0%    |
| 38    | 38          | 1       | 0.0%    |
| 39    | 39          | 3       | 0.1%    |
| 40    | 40          | 1       | 0.0%    |
| 41    | 41          | 0       |         |
| 42    | 42          | 1       | 0.0%    |
| 43    | 43          | 2       | 0.0%    |
| 44    | 44          | 0       |         |
| 45    | 45          | 1       | 0.0%    |
| 46    | 46          | 0       |         |
| 47    | 47          | 1       | 0.0%    |
| 48    | 48          | 3       | 0.1%    |
| 49    | 49          | 1       | 0.0%    |
| 50    | Fullstendig | 9       | 0.2%    |
| 97    | Ikke svart  | 0       |         |
| 98    | Ikke spurt  | 4577    | 97.6%   |

Advarsel: disse tallene indikerer antall enheter (cases) i datafilen. De kan ikke tolkes som oppsummert statistikk for populasjonen.

### # r7ocreasm1c2: Hvor viktig er kristen bakgrunn i avgjørelsen om noen får bosette seg?

|                                |                                                                                                                                                                                                                        |
|--------------------------------|------------------------------------------------------------------------------------------------------------------------------------------------------------------------------------------------------------------------|
| Informasjon                    | [Type= diskret] [Format=numeric] [Rekkevidde= 0-50] [Missing=*]                                                                                                                                                        |
| Statistikk [NW/ W]             | [Gyldige=4689 /-] [Ugyldig=0 /-]                                                                                                                                                                                       |
| Spørsmålstekst                 | Hvor viktig synes du en kristen bakgrunn bør være for å avgjøre om noen skal få bosette seg her?                                                                                                                       |
| Instruksjoner til intervjueren | [Spurt hvis u=2, ran20=3 og R7OCRECSM_mobil=0. Versjon for PC -og nettbrettbrukere. Mobilbrukere blir spurt R7OCRECSM1C2_mobile.]<br><br>[Slider blir brukt for å avgi svar. Utgangsposisjonen er satt til verdien 1.] |
| Kommentarer                    | Hvor viktig synes du en kristen bakgrunn bør være for å avgjøre om noen skal få bosette seg her? ^f('R7OCRECSM_skal                                                                                                    |

## Fil : Norsk medborgerpanel - runde 7

# r7ocrecsm1c2: Hvor viktig er kristen bakgrunn i avgjørelsen om noen får bosette seg?

| Verdi | Merkelapp            | Enheter | Prosent |
|-------|----------------------|---------|---------|
| 0     | Ikke i det hele tatt | 28      | 0.6%    |
| 1     | 1                    | 174     | 3.7%    |
| 2     | 2                    | 9       | 0.2%    |
| 3     | 3                    | 4       | 0.1%    |
| 4     | 4                    | 1       | 0.0%    |
| 5     | 5                    | 7       | 0.1%    |
| 6     | 6                    | 6       | 0.1%    |
| 7     | 7                    | 4       | 0.1%    |
| 8     | 8                    | 4       | 0.1%    |
| 9     | 9                    | 3       | 0.1%    |
| 10    | 10                   | 1       | 0.0%    |
| 11    | 11                   | 2       | 0.0%    |
| 12    | 12                   | 1       | 0.0%    |
| 13    | 13                   | 3       | 0.1%    |
| 14    | 14                   | 1       | 0.0%    |
| 15    | 15                   | 1       | 0.0%    |
| 16    | 16                   | 1       | 0.0%    |
| 17    | 17                   | 1       | 0.0%    |
| 18    | 18                   | 1       | 0.0%    |
| 19    | 19                   | 1       | 0.0%    |
| 20    | 20                   | 0       |         |
| 21    | 21                   | 0       |         |
| 22    | 22                   | 0       |         |
| 23    | 23                   | 0       |         |
| 24    | 24                   | 7       | 0.1%    |
| 25    | 25                   | 12      | 0.3%    |
| 26    | 26                   | 1       | 0.0%    |
| 27    | 27                   | 3       | 0.1%    |
| 28    | 28                   | 2       | 0.0%    |
| 29    | 29                   | 2       | 0.0%    |
| 30    | 30                   | 1       | 0.0%    |
| 31    | 31                   | 1       | 0.0%    |
| 32    | 32                   | 0       |         |
| 33    | 33                   | 4       | 0.1%    |
| 34    | 34                   | 1       | 0.0%    |
| 35    | 35                   | 2       | 0.0%    |
| 36    | 36                   | 1       | 0.0%    |
| 37    | 37                   | 1       | 0.0%    |
| 38    | 38                   | 2       | 0.0%    |
| 39    | 39                   | 2       | 0.0%    |
| 40    | 40                   | 0       |         |
| 41    | 41                   | 0       |         |
| 42    | 42                   | 0       |         |



## Fil : Norsk medborgerpanel - runde 7

### # r7ocreasm1c2: Hvor viktig er kristen bakgrunn i avgjørelsen om noen får bosette seg?

| Verdi | Merkelapp   | Enheter | Prosent |
|-------|-------------|---------|---------|
| 43    | 43          | 0       |         |
| 44    | 44          | 3       | 0.1%    |
| 45    | 45          | 0       |         |
| 46    | 46          | 3       | 0.1%    |
| 47    | 47          | 0       |         |
| 48    | 48          | 1       | 0.0%    |
| 49    | 49          | 1       | 0.0%    |
| 50    | Fullstendig | 2       | 0.0%    |
| 97    | Ikke svart  | 0       |         |
| 98    | Ikke spurt  | 4384    | 93.5%   |

Advarsel: disse tallene indikerer antall enheter (cases) i datafilen. De kan ikke tolkes som oppsummert statistikk for populasjonen.

### # r7ocreasm1c2\_mobile: Hvor viktig er kristen bakgrunn i avgjørelsen om noen får bosette seg?

|                                       |                                                                                                                                                                                                                                     |
|---------------------------------------|-------------------------------------------------------------------------------------------------------------------------------------------------------------------------------------------------------------------------------------|
| <b>Informasjon</b>                    | [Type= diskret] [Format=numeric] [Rekkevidde= 0-50] [Missing=*]                                                                                                                                                                     |
| <b>Statistikk [NW/ W]</b>             | [Gyldige=4689 /-] [Ugyldig=0 /-]                                                                                                                                                                                                    |
| <b>Spørsmålstekst</b>                 | Hvor viktig synes du en kristen bakgrunn bør være for å avgjøre om noen skal få bosette seg her?                                                                                                                                    |
| <b>Instruksjoner til intervjueren</b> | [Spurt hvis u=2, ran20=3 og R7OCRECSM_mobil=1. Versjon for mobilbrukere på grunn av oppsett. PC- og nettbrettbrukere blir spurt R7OCRECSM1C2.]<br><br>[Slider blir brukt for å avgi svar. Utgangsposisjonen er satt til verdien 1.] |
| <b>Kommentarer</b>                    | Hvor viktig synes du en kristen bakgrunn bør være for å avgjøre om noen skal få bosette seg her?                                                                                                                                    |

| Verdi | Merkelapp            | Enheter | Prosent |
|-------|----------------------|---------|---------|
| 0     | Ikke i det hele tatt | 11      | 0.2%    |
| 1     | 1                    | 70      | 1.5%    |
| 2     | 2                    | 4       | 0.1%    |
| 3     | 3                    | 0       |         |
| 4     | 4                    | 0       |         |
| 5     | 5                    | 1       | 0.0%    |
| 6     | 6                    | 0       |         |
| 7     | 7                    | 0       |         |
| 8     | 8                    | 1       | 0.0%    |
| 9     | 9                    | 0       |         |
| 10    | 10                   | 1       | 0.0%    |
| 11    | 11                   | 0       |         |
| 12    | 12                   | 1       | 0.0%    |
| 13    | 13                   | 1       | 0.0%    |
| 14    | 14                   | 1       | 0.0%    |
| 15    | 15                   | 0       |         |
| 16    | 16                   | 1       | 0.0%    |
| 17    | 17                   | 2       | 0.0%    |
| 18    | 18                   | 1       | 0.0%    |
| 19    | 19                   | 0       |         |
| 20    | 20                   | 0       |         |
| 21    | 21                   | 1       | 0.0%    |

## Fil : Norsk medborgerpanel - runde 7

### # r7ocreasm1c2\_mobile: Hvor viktig er kristen bakgrunn i avgjørelsen om noen får bosette seg?

| Verdi | Merkelapp   | Enheter | Prosent |
|-------|-------------|---------|---------|
| 22    | 22          | 0       |         |
| 23    | 23          | 0       |         |
| 24    | 24          | 0       |         |
| 25    | 25          | 1       | 0.0%    |
| 26    | 26          | 0       |         |
| 27    | 27          | 2       | 0.0%    |
| 28    | 28          | 0       |         |
| 29    | 29          | 0       |         |
| 30    | 30          | 2       | 0.0%    |
| 31    | 31          | 1       | 0.0%    |
| 32    | 32          | 0       |         |
| 33    | 33          | 0       |         |
| 34    | 34          | 0       |         |
| 35    | 35          | 1       | 0.0%    |
| 36    | 36          | 0       |         |
| 37    | 37          | 3       | 0.1%    |
| 38    | 38          | 0       |         |
| 39    | 39          | 1       | 0.0%    |
| 40    | 40          | 0       |         |
| 41    | 41          | 0       |         |
| 42    | 42          | 0       |         |
| 43    | 43          | 0       |         |
| 44    | 44          | 1       | 0.0%    |
| 45    | 45          | 1       | 0.0%    |
| 46    | 46          | 0       |         |
| 47    | 47          | 0       |         |
| 48    | 48          | 0       |         |
| 49    | 49          | 0       |         |
| 50    | Fullstendig | 3       | 0.1%    |
| 97    | Ikke svart  | 0       |         |
| 98    | Ikke spurt  | 4577    | 97.6%   |

Advarsel: disse tallene indikerer antall enheter (cases) i datafilen. De kan ikke tolkes som oppsummert statistikk for populasjonen.

### # r7ocreasm1c3: Hvor viktig er kunnskaper/ferdigheter som Norge trenger i avgjørelsen om noen får bosette seg?

|                                |                                                                                                                                   |         |         |
|--------------------------------|-----------------------------------------------------------------------------------------------------------------------------------|---------|---------|
| Informasjon                    | [Type= diskret] [Format=numeric] [Rekkevidde= 0-50] [Missing=*]                                                                   |         |         |
| Statistikk [NW/ W]             | [Gyldige=4689 /-] [Ugyldig=0 /-]                                                                                                  |         |         |
| Spørsmålstekst                 | Hvor viktig synes du kunnskaper og ferdigheter som Norge trenger bør være for å avgjøre om noen skal få bosette seg her?          |         |         |
| Instruksjoner til intervjueren | [Spurt hvis u=2, ran20=3 og R7OCRECSM_mobil=0. Versjon for PC -og nettbrettbrukere. Mobilbrukere blir spurt R7OCRECSM1C3_mobile.] |         |         |
|                                | [Slider blir brukt for å avgi svar. Utgangsposisjonen er satt til verdien 1.]                                                     |         |         |
| Kommentarer                    | Hvor viktig synes du kunnskaper og ferdigheter som Norge trenger bør være for å avgjøre om noen skal få bosette seg               |         |         |
| Verdi                          | Merkelapp                                                                                                                         | Enheter | Prosent |
| 0                              | Ikke i det hele tatt                                                                                                              | 8       | 0.2%    |

## Fil : Norsk medborgerpanel - runde 7

# r70crecsm1c3: Hvor viktig er kunnskaper/ferdigheter som Norge trenger i avgjørelsen om noen får bosette seg?

| Verdi | Merkelapp | Enheter | Prosent |
|-------|-----------|---------|---------|
| 1     | 1         | 57      | 1.2%    |
| 2     | 2         | 3       | 0.1%    |
| 3     | 3         | 5       | 0.1%    |
| 4     | 4         | 4       | 0.1%    |
| 5     | 5         | 3       | 0.1%    |
| 6     | 6         | 10      | 0.2%    |
| 7     | 7         | 3       | 0.1%    |
| 8     | 8         | 4       | 0.1%    |
| 9     | 9         | 6       | 0.1%    |
| 10    | 10        | 3       | 0.1%    |
| 11    | 11        | 7       | 0.1%    |
| 12    | 12        | 9       | 0.2%    |
| 13    | 13        | 4       | 0.1%    |
| 14    | 14        | 8       | 0.2%    |
| 15    | 15        | 3       | 0.1%    |
| 16    | 16        | 2       | 0.0%    |
| 17    | 17        | 2       | 0.0%    |
| 18    | 18        | 3       | 0.1%    |
| 19    | 19        | 2       | 0.0%    |
| 20    | 20        | 2       | 0.0%    |
| 21    | 21        | 2       | 0.0%    |
| 22    | 22        | 3       | 0.1%    |
| 23    | 23        | 5       | 0.1%    |
| 24    | 24        | 14      | 0.3%    |
| 25    | 25        | 32      | 0.7%    |
| 26    | 26        | 4       | 0.1%    |
| 27    | 27        | 6       | 0.1%    |
| 28    | 28        | 3       | 0.1%    |
| 29    | 29        | 6       | 0.1%    |
| 30    | 30        | 3       | 0.1%    |
| 31    | 31        | 5       | 0.1%    |
| 32    | 32        | 3       | 0.1%    |
| 33    | 33        | 8       | 0.2%    |
| 34    | 34        | 2       | 0.0%    |
| 35    | 35        | 3       | 0.1%    |
| 36    | 36        | 7       | 0.1%    |
| 37    | 37        | 7       | 0.1%    |
| 38    | 38        | 6       | 0.1%    |
| 39    | 39        | 5       | 0.1%    |
| 40    | 40        | 2       | 0.0%    |
| 41    | 41        | 5       | 0.1%    |
| 42    | 42        | 0       |         |
| 43    | 43        | 2       | 0.0%    |

## Fil : Norsk medborgerpanel - runde 7

### # r7ocreasm1c3: Hvor viktig er kunnskaper/ferdigheter som Norge trenger i avgjørelsen om noen får bosette seg?

| Verdi | Merkelapp   | Enheter | Prosent |
|-------|-------------|---------|---------|
| 44    | 44          | 3       | 0.1%    |
| 45    | 45          | 0       |         |
| 46    | 46          | 2       | 0.0%    |
| 47    | 47          | 1       | 0.0%    |
| 48    | 48          | 0       |         |
| 49    | 49          | 1       | 0.0%    |
| 50    | Fullstendig | 17      | 0.4%    |
| 97    | Ikke svart  | 0       |         |
| 98    | Ikke spurt  | 4384    | 93.5%   |

Advarsel: disse tallene indikerer antall enheter (cases) i datafilen. De kan ikke tolkes som oppsummert statistikk for populasjonen.

### # r7ocreasm1c3\_mobile: Hvor viktig er kunnskaper/ferdigheter som Norge trenger i avgjørelsen om noen får bosette seg?

|                                |                                                                                                                                                                                                                                     |
|--------------------------------|-------------------------------------------------------------------------------------------------------------------------------------------------------------------------------------------------------------------------------------|
| Informasjon                    | [Type= diskret] [Format=numeric] [Rekkevidde= 0-50] [Missing=*]                                                                                                                                                                     |
| Statistikk [NW/ W]             | [Gyldige=4689 /-] [Ugyldig=0 /-]                                                                                                                                                                                                    |
| Spørsmålstekst                 | Hvor viktig synes du kunnskaper og ferdigheter som Norge trenger bør være for å avgjøre om noen skal få bosette seg her?                                                                                                            |
| Instruksjoner til intervjueren | [Spurt hvis u=2, ran20=3 og R7OCRECSM_mobil=1. Versjon for mobilbrukere på grunn av oppsett. PC- og nettbrettbrukere blir spurt R7OCRECSM1C3.]<br><br>[Slider blir brukt for å avgi svar. Utgangsposisjonen er satt til verdien 1.] |
| Kommentarer                    | Hvor viktig synes du kunnskaper og ferdigheter som Norge trenger bør være for å avgjøre om noen skal få bosette seg                                                                                                                 |

| Verdi | Merkelapp            | Enheter | Prosent |
|-------|----------------------|---------|---------|
| 0     | Ikke i det hele tatt | 3       | 0.1%    |
| 1     | 1                    | 17      | 0.4%    |
| 2     | 2                    | 1       | 0.0%    |
| 3     | 3                    | 3       | 0.1%    |
| 4     | 4                    | 0       |         |
| 5     | 5                    | 2       | 0.0%    |
| 6     | 6                    | 1       | 0.0%    |
| 7     | 7                    | 2       | 0.0%    |
| 8     | 8                    | 1       | 0.0%    |
| 9     | 9                    | 0       |         |
| 10    | 10                   | 5       | 0.1%    |
| 11    | 11                   | 3       | 0.1%    |
| 12    | 12                   | 1       | 0.0%    |
| 13    | 13                   | 4       | 0.1%    |
| 14    | 14                   | 2       | 0.0%    |
| 15    | 15                   | 3       | 0.1%    |
| 16    | 16                   | 3       | 0.1%    |
| 17    | 17                   | 1       | 0.0%    |
| 18    | 18                   | 3       | 0.1%    |
| 19    | 19                   | 0       |         |
| 20    | 20                   | 3       | 0.1%    |
| 21    | 21                   | 2       | 0.0%    |

## Fil : Norsk medborgerpanel - runde 7

# r7ocreasm1c3\_mobile: Hvor viktig er kunnskaper/ferdigheter som Norge trenger i avgjørelsen om noen får bosette seg?

| Verdi | Merkelapp   | Enheter | Prosent |
|-------|-------------|---------|---------|
| 22    | 22          | 1       | 0.0%    |
| 23    | 23          | 0       |         |
| 24    | 24          | 1       | 0.0%    |
| 25    | 25          | 0       |         |
| 26    | 26          | 0       |         |
| 27    | 27          | 3       | 0.1%    |
| 28    | 28          | 2       | 0.0%    |
| 29    | 29          | 2       | 0.0%    |
| 30    | 30          | 5       | 0.1%    |
| 31    | 31          | 3       | 0.1%    |
| 32    | 32          | 0       |         |
| 33    | 33          | 2       | 0.0%    |
| 34    | 34          | 0       |         |
| 35    | 35          | 2       | 0.0%    |
| 36    | 36          | 3       | 0.1%    |
| 37    | 37          | 6       | 0.1%    |
| 38    | 38          | 2       | 0.0%    |
| 39    | 39          | 2       | 0.0%    |
| 40    | 40          | 0       |         |
| 41    | 41          | 1       | 0.0%    |
| 42    | 42          | 1       | 0.0%    |
| 43    | 43          | 0       |         |
| 44    | 44          | 0       |         |
| 45    | 45          | 1       | 0.0%    |
| 46    | 46          | 0       |         |
| 47    | 47          | 3       | 0.1%    |
| 48    | 48          | 0       |         |
| 49    | 49          | 0       |         |
| 50    | Fullstendig | 12      | 0.3%    |
| 97    | Ikke svart  | 0       |         |
| 98    | Ikke spurt  | 4577    | 97.6%   |

Advarsel: disse tallene indikerer antall enheter (cases) i datafilen. De kan ikke tolkes som oppsummert statistikk for populasjonen.

# r7ocreasm2a1\_1: I hvilken grad bør Høyesteretts makt i kontroversielle saker reduseres?

|                                       |                                                                                                                                   |
|---------------------------------------|-----------------------------------------------------------------------------------------------------------------------------------|
| <b>Informasjon</b>                    | [Type= diskret] [Format=numeric] [Rekkevidde= 1-5] [Missing=*]                                                                    |
| <b>Statistikk [NW/ W]</b>             | [Gyldige=4689 /-] [Ugyldig=0 /-]                                                                                                  |
| <b>Spørsmålstekst</b>                 | Generelt sett, i hvilken grad mener du at Norges Høyesteretts makt til å avgjøre visse typer kontroversielle saker bør reduseres? |
| <b>Instruksjoner til intervjueren</b> | [Spurt hvis ran20=1 . ]                                                                                                           |
| <b>Kommentarer</b>                    | R7OCRECSM2A1_1 (Generelt sett, i hvilken grad mener du at Norges Høyesteretts makt til å avgjøre visse typer kontrover            |

| Verdi | Merkelapp            | Enheter | Prosent |
|-------|----------------------|---------|---------|
| 1     | Ikke i det hele tatt | 123     | 2.6%    |

## Fil : Norsk medborgerpanel - runde 7

### # r7ocreasm2a1\_1: I hvilken grad bør Høyesteretts makt i kontroversielle saker reduseres?

| Verdi | Merkelapp   | Enheter | Prosent |
|-------|-------------|---------|---------|
| 2     | 2           | 76      | 1.6%    |
| 3     | 3           | 114     | 2.4%    |
| 4     | 4           | 33      | 0.7%    |
| 5     | Fullstendig | 8       | 0.2%    |
| 97    | Ikke svart  | 18      | 0.4%    |
| 98    | Ikke spurt  | 4317    | 92.1%   |

Advarsel: disse tallene indikerer antall enheter (cases) i datafilen. De kan ikke tolkes som oppsummert statistikk for populasjonen.

### # r7ocreasm2a2\_1: I hvilken grad favoriserer Høyesterett enkelte grupper?

|                                       |                                                                                                                         |
|---------------------------------------|-------------------------------------------------------------------------------------------------------------------------|
| <b>Informasjon</b>                    | [Type= diskret] [Format=numeric] [Rekkevidde= 1-5] [Missing=*]                                                          |
| <b>Statistikk [NW/ W]</b>             | [Gyldige=4689 /-] [Ugyldig=0 /-]                                                                                        |
| <b>Spørsmålstekst</b>                 | I hvilken grad mener du at avgjørelsene til Norges Høyesterett favoriserer enkelte grupper mer enn andre?               |
| <b>Instruksjoner til intervjueren</b> | [Spurt hvis ran20=1 . ]                                                                                                 |
| <b>Kommentarer</b>                    | R7OCRECSM2A2_1 (I hvilken grad mener du at avgjørelsene til Norges Høyesterett favoriserer enkelte grupper mer enn andr |

| Verdi | Merkelapp            | Enheter | Prosent |
|-------|----------------------|---------|---------|
| 1     | Ikke i det hele tatt | 91      | 1.9%    |
| 2     | 2                    | 90      | 1.9%    |
| 3     | 3                    | 136     | 2.9%    |
| 4     | 4                    | 27      | 0.6%    |
| 5     | Fullstendig          | 7       | 0.1%    |
| 97    | Ikke svart           | 21      | 0.4%    |
| 98    | Ikke spurt           | 4317    | 92.1%   |

Advarsel: disse tallene indikerer antall enheter (cases) i datafilen. De kan ikke tolkes som oppsummert statistikk for populasjonen.

### # r7ocreasm2a3\_1: I hvilken grad kan domstolen avskaffes, dersom Høyesterett tar mange valg folk er uenige i?

|                                       |                                                                                                                                                                               |
|---------------------------------------|-------------------------------------------------------------------------------------------------------------------------------------------------------------------------------|
| <b>Informasjon</b>                    | [Type= diskret] [Format=numeric] [Rekkevidde= 1-5] [Missing=*]                                                                                                                |
| <b>Statistikk [NW/ W]</b>             | [Gyldige=4689 /-] [Ugyldig=0 /-]                                                                                                                                              |
| <b>Spørsmålstekst</b>                 | Og i hvilken grad mener du at dersom Norges Høyesterett begynner å ta mange avgjørelser som folk flest er uenige i, kan det være like greit å avskaffe domstolen fullstendig? |
| <b>Instruksjoner til intervjueren</b> | [Spurt hvis ran20=1 . ]                                                                                                                                                       |
| <b>Kommentarer</b>                    | R7OCRECSM2A3_1 (Og i hvilken grad mener du at dersom Norges Høyesterett begynner å ta mange avgjørelser som folk flest                                                        |

| Verdi | Merkelapp            | Enheter | Prosent |
|-------|----------------------|---------|---------|
| 1     | Ikke i det hele tatt | 152     | 3.2%    |
| 2     | 2                    | 81      | 1.7%    |
| 3     | 3                    | 85      | 1.8%    |
| 4     | 4                    | 33      | 0.7%    |
| 5     | Fullstendig          | 7       | 0.1%    |
| 97    | Ikke svart           | 14      | 0.3%    |
| 98    | Ikke spurt           | 4317    | 92.1%   |

Advarsel: disse tallene indikerer antall enheter (cases) i datafilen. De kan ikke tolkes som oppsummert statistikk for populasjonen.

## Fil : Norsk medborgerpanel - runde 7

### # r7ocrecsm2b1: I hvilken grad bør Høyesteretts makt i kontroversielle saker reduseres?

|                                       |                                                                                                                                                                                                                         |
|---------------------------------------|-------------------------------------------------------------------------------------------------------------------------------------------------------------------------------------------------------------------------|
| <b>Informasjon</b>                    | [Type= diskret] [Format=numeric] [Rekkevidde= 0-50] [Missing=*]                                                                                                                                                         |
| <b>Statistikk [NW/ W]</b>             | [Gyldige=4689 /-] [Ugyldig=0 /-]                                                                                                                                                                                        |
| <b>Spørsmålstekst</b>                 | Generelt sett, i hvilken grad mener du at Norges Høyesteretts makt til å avgjøre visse typer kontroversielle saker bør reduseres?                                                                                       |
| <b>Instruksjoner til intervjueren</b> | [Spurt hvis u=2, ran20=2 og R7OCRECSM_mobil=0. Versjon for PC -og nettbrettbrukere. Mobilbrukere blir spurt R7OCRECSM2B1_mobile.]<br><br>[Slider blir brukt for å avgi svar. Utgangsposisjonen er satt til verdien 25.] |
| <b>Kommentarer</b>                    | Generelt sett, i hvilken grad mener du at Norges Høyesteretts makt til å avgjøre visse typer kontroversielle saker bør                                                                                                  |

| Verdi | Merkelapp            | Enheter | Prosent |
|-------|----------------------|---------|---------|
| 0     | Ikke i det hele tatt | 33      | 0.7%    |
| 1     | 1                    | 5       | 0.1%    |
| 2     | 2                    | 5       | 0.1%    |
| 3     | 3                    | 4       | 0.1%    |
| 4     | 4                    | 5       | 0.1%    |
| 5     | 5                    | 5       | 0.1%    |
| 6     | 6                    | 10      | 0.2%    |
| 7     | 7                    | 4       | 0.1%    |
| 8     | 8                    | 9       | 0.2%    |
| 9     | 9                    | 5       | 0.1%    |
| 10    | 10                   | 5       | 0.1%    |
| 11    | 11                   | 10      | 0.2%    |
| 12    | 12                   | 11      | 0.2%    |
| 13    | 13                   | 7       | 0.1%    |
| 14    | 14                   | 6       | 0.1%    |
| 15    | 15                   | 8       | 0.2%    |
| 16    | 16                   | 3       | 0.1%    |
| 17    | 17                   | 5       | 0.1%    |
| 18    | 18                   | 2       | 0.0%    |
| 19    | 19                   | 8       | 0.2%    |
| 20    | 20                   | 4       | 0.1%    |
| 21    | 21                   | 2       | 0.0%    |
| 22    | 22                   | 4       | 0.1%    |
| 23    | 23                   | 3       | 0.1%    |
| 24    | 24                   | 6       | 0.1%    |
| 25    | 25                   | 92      | 2.0%    |
| 26    | 26                   | 1       | 0.0%    |
| 27    | 27                   | 5       | 0.1%    |
| 28    | 28                   | 2       | 0.0%    |
| 29    | 29                   | 3       | 0.1%    |
| 30    | 30                   | 1       | 0.0%    |
| 31    | 31                   | 3       | 0.1%    |
| 32    | 32                   | 3       | 0.1%    |
| 33    | 33                   | 3       | 0.1%    |
| 34    | 34                   | 1       | 0.0%    |

## Fil : Norsk medborgerpanel - runde 7

### # r7ocreasm2b1: I hvilken grad bør Høyesteretts makt i kontroversielle saker reduseres?

| Verdi | Merkelapp   | Enheter | Prosent |
|-------|-------------|---------|---------|
| 35    | 35          | 1       | 0.0%    |
| 36    | 36          | 1       | 0.0%    |
| 37    | 37          | 1       | 0.0%    |
| 38    | 38          | 2       | 0.0%    |
| 39    | 39          | 2       | 0.0%    |
| 40    | 40          | 1       | 0.0%    |
| 41    | 41          | 0       |         |
| 42    | 42          | 3       | 0.1%    |
| 43    | 43          | 1       | 0.0%    |
| 44    | 44          | 0       |         |
| 45    | 45          | 0       |         |
| 46    | 46          | 0       |         |
| 47    | 47          | 0       |         |
| 48    | 48          | 0       |         |
| 49    | 49          | 1       | 0.0%    |
| 50    | Fullstendig | 4       | 0.1%    |
| 97    | Ikke svart  | 0       |         |
| 98    | Ikke spurt  | 4389    | 93.6%   |

Advarsel: disse tallene indikerer antall enheter (cases) i datafilen. De kan ikke tolkes som oppsummert statistikk for populasjonen.

### # r7ocreasm2b1\_mobile: I hvilken grad bør Høyesteretts makt i kontroversielle saker reduseres?

|                                       |                                                                                                                                                                                                                                      |
|---------------------------------------|--------------------------------------------------------------------------------------------------------------------------------------------------------------------------------------------------------------------------------------|
| <b>Informasjon</b>                    | [Type= diskret] [Format=numeric] [Rekkevidde= 0-50] [Missing=*]                                                                                                                                                                      |
| <b>Statistikk [NW/ W]</b>             | [Gyldige=4689 /-] [Ugyldig=0 /-]                                                                                                                                                                                                     |
| <b>Spørsmålstekst</b>                 | Generelt sett, i hvilken grad mener du at Norges Høyesteretts makt til å avgjøre visse typer kontroversielle saker bør reduseres?                                                                                                    |
| <b>Instruksjoner til intervjueren</b> | [Spurt hvis u=2, ran20=2 og R7OCRECSM_mobil=1. Versjon for mobilbrukere på grunn av oppsett. PC- og nettbrettbrukere blir spurt R7OCRECSM2B1.]<br><br>[Slider blir brukt for å avgi svar. Utgangsposisjonen er satt til verdien 25.] |
| <b>Kommentarer</b>                    | Generelt sett, i hvilken grad mener du at Norges Høyesteretts makt til å avgjøre visse typer kontroversielle saker bør                                                                                                               |

| Verdi | Merkelapp            | Enheter | Prosent |
|-------|----------------------|---------|---------|
| 0     | Ikke i det hele tatt | 12      | 0.3%    |
| 1     | 1                    | 2       | 0.0%    |
| 2     | 2                    | 0       |         |
| 3     | 3                    | 1       | 0.0%    |
| 4     | 4                    | 0       |         |
| 5     | 5                    | 2       | 0.0%    |
| 6     | 6                    | 2       | 0.0%    |
| 7     | 7                    | 0       |         |
| 8     | 8                    | 3       | 0.1%    |
| 9     | 9                    | 3       | 0.1%    |
| 10    | 10                   | 3       | 0.1%    |
| 11    | 11                   | 1       | 0.0%    |
| 12    | 12                   | 3       | 0.1%    |
| 13    | 13                   | 3       | 0.1%    |



## Fil : Norsk medborgerpanel - runde 7

# r7ocrecsm2b1\_mobile: I hvilken grad bør Høyesteretts makt i kontroversielle saker reduseres?

| Verdi | Merkelapp   | Enheter | Prosent |
|-------|-------------|---------|---------|
| 14    | 14          | 3       | 0.1%    |
| 15    | 15          | 2       | 0.0%    |
| 16    | 16          | 2       | 0.0%    |
| 17    | 17          | 2       | 0.0%    |
| 18    | 18          | 2       | 0.0%    |
| 19    | 19          | 0       |         |
| 20    | 20          | 0       |         |
| 21    | 21          | 0       |         |
| 22    | 22          | 2       | 0.0%    |
| 23    | 23          | 0       |         |
| 24    | 24          | 0       |         |
| 25    | 25          | 37      | 0.8%    |
| 26    | 26          | 1       | 0.0%    |
| 27    | 27          | 2       | 0.0%    |
| 28    | 28          | 0       |         |
| 29    | 29          | 2       | 0.0%    |
| 30    | 30          | 1       | 0.0%    |
| 31    | 31          | 1       | 0.0%    |
| 32    | 32          | 3       | 0.1%    |
| 33    | 33          | 1       | 0.0%    |
| 34    | 34          | 1       | 0.0%    |
| 35    | 35          | 1       | 0.0%    |
| 36    | 36          | 1       | 0.0%    |
| 37    | 37          | 0       |         |
| 38    | 38          | 2       | 0.0%    |
| 39    | 39          | 0       |         |
| 40    | 40          | 1       | 0.0%    |
| 41    | 41          | 1       | 0.0%    |
| 42    | 42          | 0       |         |
| 43    | 43          | 2       | 0.0%    |
| 44    | 44          | 1       | 0.0%    |
| 45    | 45          | 1       | 0.0%    |
| 46    | 46          | 0       |         |
| 47    | 47          | 0       |         |
| 48    | 48          | 1       | 0.0%    |
| 49    | 49          | 1       | 0.0%    |
| 50    | Fullstendig | 1       | 0.0%    |
| 97    | Ikke svart  | 0       |         |
| 98    | Ikke spurt  | 4579    | 97.7%   |

Advarsel: disse tallene indikerer antall enheter (cases) i datafilen. De kan ikke tolkes som oppsummert statistikk for populasjonen.

| # r7ocreasm2b2: I hvilken grad favoriserer Høyesterett enkelte grupper? |                                                                                                                                                                                                                         |         |         |
|-------------------------------------------------------------------------|-------------------------------------------------------------------------------------------------------------------------------------------------------------------------------------------------------------------------|---------|---------|
| Informasjon                                                             | [Type= diskret] [Format=numeric] [Rekkevidde= 0-50] [Missing=*]                                                                                                                                                         |         |         |
| Statistikk [NW/ W]                                                      | [Gyldige=4689 /-] [Ugyldig=0 /-]                                                                                                                                                                                        |         |         |
| Spørsmålstekst                                                          | I hvilken grad mener du at avgjørelsene til Norges Høyesterett favoriserer enkelte grupper mer enn andre?                                                                                                               |         |         |
| Instruksjoner til intervjueren                                          | [Spurt hvis u=2, ran20=2 og R7OCRECSM_mobil=0. Versjon for PC -og nettbrettbrukere. Mobilbrukere blir spurt R7OCRECSM2B2_mobile.]<br><br>[Slider blir brukt for å avgi svar. Utgangsposisjonen er satt til verdien 25.] |         |         |
| Kommentarer                                                             | I hvilken grad mener du at avgjørelsene til Norges Høyesterett favoriserer enkelte grupper mer enn andre? ^f('R7OCRECS                                                                                                  |         |         |
| Verdi                                                                   | Merkelapp                                                                                                                                                                                                               | Enheter | Prosent |
| 0                                                                       | Ikke i det hele tatt                                                                                                                                                                                                    | 24      | 0.5%    |
| 1                                                                       | 1                                                                                                                                                                                                                       | 5       | 0.1%    |
| 2                                                                       | 2                                                                                                                                                                                                                       | 5       | 0.1%    |
| 3                                                                       | 3                                                                                                                                                                                                                       | 8       | 0.2%    |
| 4                                                                       | 4                                                                                                                                                                                                                       | 8       | 0.2%    |
| 5                                                                       | 5                                                                                                                                                                                                                       | 4       | 0.1%    |
| 6                                                                       | 6                                                                                                                                                                                                                       | 7       | 0.1%    |
| 7                                                                       | 7                                                                                                                                                                                                                       | 7       | 0.1%    |
| 8                                                                       | 8                                                                                                                                                                                                                       | 5       | 0.1%    |
| 9                                                                       | 9                                                                                                                                                                                                                       | 6       | 0.1%    |
| 10                                                                      | 10                                                                                                                                                                                                                      | 3       | 0.1%    |
| 11                                                                      | 11                                                                                                                                                                                                                      | 7       | 0.1%    |
| 12                                                                      | 12                                                                                                                                                                                                                      | 3       | 0.1%    |
| 13                                                                      | 13                                                                                                                                                                                                                      | 7       | 0.1%    |
| 14                                                                      | 14                                                                                                                                                                                                                      | 7       | 0.1%    |
| 15                                                                      | 15                                                                                                                                                                                                                      | 6       | 0.1%    |
| 16                                                                      | 16                                                                                                                                                                                                                      | 6       | 0.1%    |
| 17                                                                      | 17                                                                                                                                                                                                                      | 5       | 0.1%    |
| 18                                                                      | 18                                                                                                                                                                                                                      | 4       | 0.1%    |
| 19                                                                      | 19                                                                                                                                                                                                                      | 2       | 0.0%    |
| 20                                                                      | 20                                                                                                                                                                                                                      | 2       | 0.0%    |
| 21                                                                      | 21                                                                                                                                                                                                                      | 3       | 0.1%    |
| 22                                                                      | 22                                                                                                                                                                                                                      | 1       | 0.0%    |
| 23                                                                      | 23                                                                                                                                                                                                                      | 3       | 0.1%    |
| 24                                                                      | 24                                                                                                                                                                                                                      | 3       | 0.1%    |
| 25                                                                      | 25                                                                                                                                                                                                                      | 106     | 2.3%    |
| 26                                                                      | 26                                                                                                                                                                                                                      | 1       | 0.0%    |
| 27                                                                      | 27                                                                                                                                                                                                                      | 7       | 0.1%    |
| 28                                                                      | 28                                                                                                                                                                                                                      | 4       | 0.1%    |
| 29                                                                      | 29                                                                                                                                                                                                                      | 6       | 0.1%    |
| 30                                                                      | 30                                                                                                                                                                                                                      | 4       | 0.1%    |
| 31                                                                      | 31                                                                                                                                                                                                                      | 8       | 0.2%    |
| 32                                                                      | 32                                                                                                                                                                                                                      | 2       | 0.0%    |
| 33                                                                      | 33                                                                                                                                                                                                                      | 6       | 0.1%    |
| 34                                                                      | 34                                                                                                                                                                                                                      | 3       | 0.1%    |
| 35                                                                      | 35                                                                                                                                                                                                                      | 2       | 0.0%    |
| 36                                                                      | 36                                                                                                                                                                                                                      | 4       | 0.1%    |

| # r7ocreasm2b2: I hvilken grad favoriserer Høyesterett enkelte grupper?                                                              |                                                                                                                                                                                                                                      |         |         |
|--------------------------------------------------------------------------------------------------------------------------------------|--------------------------------------------------------------------------------------------------------------------------------------------------------------------------------------------------------------------------------------|---------|---------|
| Verdi                                                                                                                                | Merkelapp                                                                                                                                                                                                                            | Enheter | Prosent |
| 37                                                                                                                                   | 37                                                                                                                                                                                                                                   | 0       |         |
| 38                                                                                                                                   | 38                                                                                                                                                                                                                                   | 1       | 0.0%    |
| 39                                                                                                                                   | 39                                                                                                                                                                                                                                   | 2       | 0.0%    |
| 40                                                                                                                                   | 40                                                                                                                                                                                                                                   | 0       |         |
| 41                                                                                                                                   | 41                                                                                                                                                                                                                                   | 0       |         |
| 42                                                                                                                                   | 42                                                                                                                                                                                                                                   | 0       |         |
| 43                                                                                                                                   | 43                                                                                                                                                                                                                                   | 1       | 0.0%    |
| 44                                                                                                                                   | 44                                                                                                                                                                                                                                   | 1       | 0.0%    |
| 45                                                                                                                                   | 45                                                                                                                                                                                                                                   | 0       |         |
| 46                                                                                                                                   | 46                                                                                                                                                                                                                                   | 0       |         |
| 47                                                                                                                                   | 47                                                                                                                                                                                                                                   | 0       |         |
| 48                                                                                                                                   | 48                                                                                                                                                                                                                                   | 0       |         |
| 49                                                                                                                                   | 49                                                                                                                                                                                                                                   | 0       |         |
| 50                                                                                                                                   | Fullstendig                                                                                                                                                                                                                          | 1       | 0.0%    |
| 97                                                                                                                                   | Ikke svart                                                                                                                                                                                                                           | 0       |         |
| 98                                                                                                                                   | Ikke spurt                                                                                                                                                                                                                           | 4389    | 93.6%   |
| Advarsel: disse tallene indikerer antall enheter (cases) i datafilen. De kan ikke tolkes som oppsummert statistikk for populasjonen. |                                                                                                                                                                                                                                      |         |         |
| # r7ocreasm2b2_mobile: I hvilken grad favoriserer Høyesterett enkelte grupper?                                                       |                                                                                                                                                                                                                                      |         |         |
| Informasjon                                                                                                                          | [Type= diskret] [Format=numeric] [Rekkevidde= 0-50] [Missing=*]                                                                                                                                                                      |         |         |
| Statistikk [NW/ W]                                                                                                                   | [Gyldige=4689 /-] [Ugyldig=0 /-]                                                                                                                                                                                                     |         |         |
| Spørsmålstekst                                                                                                                       | I hvilken grad mener du at avgjørelsene til Norges Høyesterett favoriserer enkelte grupper mer enn andre?                                                                                                                            |         |         |
| Instruksjoner til intervjueren                                                                                                       | [Spurt hvis u=2, ran20=2 og R7OCRECSM_mobil=1. Versjon for mobilbrukere på grunn av oppsett. PC- og nettbrettbrukere blir spurt R7OCRECSM2B2.]<br><br>[Slider blir brukt for å avgi svar. Utgangsposisjonen er satt til verdien 25.] |         |         |
| Kommentarer                                                                                                                          | I hvilken grad mener du at avgjørelsene til Norges Høyesterett favoriserer enkelte grupper mer enn andre?                                                                                                                            |         |         |
| Verdi                                                                                                                                | Merkelapp                                                                                                                                                                                                                            | Enheter | Prosent |
| 0                                                                                                                                    | Ikke i det hele tatt                                                                                                                                                                                                                 | 7       | 0.1%    |
| 1                                                                                                                                    | 1                                                                                                                                                                                                                                    | 2       | 0.0%    |
| 2                                                                                                                                    | 2                                                                                                                                                                                                                                    | 1       | 0.0%    |
| 3                                                                                                                                    | 3                                                                                                                                                                                                                                    | 0       |         |
| 4                                                                                                                                    | 4                                                                                                                                                                                                                                    | 3       | 0.1%    |
| 5                                                                                                                                    | 5                                                                                                                                                                                                                                    | 2       | 0.0%    |
| 6                                                                                                                                    | 6                                                                                                                                                                                                                                    | 3       | 0.1%    |
| 7                                                                                                                                    | 7                                                                                                                                                                                                                                    | 0       |         |
| 8                                                                                                                                    | 8                                                                                                                                                                                                                                    | 1       | 0.0%    |
| 9                                                                                                                                    | 9                                                                                                                                                                                                                                    | 0       |         |
| 10                                                                                                                                   | 10                                                                                                                                                                                                                                   | 1       | 0.0%    |
| 11                                                                                                                                   | 11                                                                                                                                                                                                                                   | 1       | 0.0%    |
| 12                                                                                                                                   | 12                                                                                                                                                                                                                                   | 2       | 0.0%    |
| 13                                                                                                                                   | 13                                                                                                                                                                                                                                   | 3       | 0.1%    |
| 14                                                                                                                                   | 14                                                                                                                                                                                                                                   | 1       | 0.0%    |
| 15                                                                                                                                   | 15                                                                                                                                                                                                                                   | 1       | 0.0%    |
| 16                                                                                                                                   | 16                                                                                                                                                                                                                                   | 1       | 0.0%    |
| 17                                                                                                                                   | 17                                                                                                                                                                                                                                   | 1       | 0.0%    |

| # r7ocreasm2b2_mobile: I hvilken grad favoriserer Høyesterett enkelte grupper?                                                       |                                                                                                                                                                                                                         |         |         |
|--------------------------------------------------------------------------------------------------------------------------------------|-------------------------------------------------------------------------------------------------------------------------------------------------------------------------------------------------------------------------|---------|---------|
| Verdi                                                                                                                                | Merkelapp                                                                                                                                                                                                               | Enheter | Prosent |
| 18                                                                                                                                   | 18                                                                                                                                                                                                                      | 0       |         |
| 19                                                                                                                                   | 19                                                                                                                                                                                                                      | 0       |         |
| 20                                                                                                                                   | 20                                                                                                                                                                                                                      | 0       |         |
| 21                                                                                                                                   | 21                                                                                                                                                                                                                      | 2       | 0.0%    |
| 22                                                                                                                                   | 22                                                                                                                                                                                                                      | 0       |         |
| 23                                                                                                                                   | 23                                                                                                                                                                                                                      | 1       | 0.0%    |
| 24                                                                                                                                   | 24                                                                                                                                                                                                                      | 1       | 0.0%    |
| 25                                                                                                                                   | 25                                                                                                                                                                                                                      | 53      | 1.1%    |
| 26                                                                                                                                   | 26                                                                                                                                                                                                                      | 1       | 0.0%    |
| 27                                                                                                                                   | 27                                                                                                                                                                                                                      | 1       | 0.0%    |
| 28                                                                                                                                   | 28                                                                                                                                                                                                                      | 0       |         |
| 29                                                                                                                                   | 29                                                                                                                                                                                                                      | 1       | 0.0%    |
| 30                                                                                                                                   | 30                                                                                                                                                                                                                      | 2       | 0.0%    |
| 31                                                                                                                                   | 31                                                                                                                                                                                                                      | 0       |         |
| 32                                                                                                                                   | 32                                                                                                                                                                                                                      | 1       | 0.0%    |
| 33                                                                                                                                   | 33                                                                                                                                                                                                                      | 3       | 0.1%    |
| 34                                                                                                                                   | 34                                                                                                                                                                                                                      | 3       | 0.1%    |
| 35                                                                                                                                   | 35                                                                                                                                                                                                                      | 1       | 0.0%    |
| 36                                                                                                                                   | 36                                                                                                                                                                                                                      | 0       |         |
| 37                                                                                                                                   | 37                                                                                                                                                                                                                      | 1       | 0.0%    |
| 38                                                                                                                                   | 38                                                                                                                                                                                                                      | 2       | 0.0%    |
| 39                                                                                                                                   | 39                                                                                                                                                                                                                      | 1       | 0.0%    |
| 40                                                                                                                                   | 40                                                                                                                                                                                                                      | 0       |         |
| 41                                                                                                                                   | 41                                                                                                                                                                                                                      | 1       | 0.0%    |
| 42                                                                                                                                   | 42                                                                                                                                                                                                                      | 0       |         |
| 43                                                                                                                                   | 43                                                                                                                                                                                                                      | 1       | 0.0%    |
| 44                                                                                                                                   | 44                                                                                                                                                                                                                      | 0       |         |
| 45                                                                                                                                   | 45                                                                                                                                                                                                                      | 0       |         |
| 46                                                                                                                                   | 46                                                                                                                                                                                                                      | 0       |         |
| 47                                                                                                                                   | 47                                                                                                                                                                                                                      | 0       |         |
| 48                                                                                                                                   | 48                                                                                                                                                                                                                      | 1       | 0.0%    |
| 49                                                                                                                                   | 49                                                                                                                                                                                                                      | 0       |         |
| 50                                                                                                                                   | Fullstendig                                                                                                                                                                                                             | 3       | 0.1%    |
| 97                                                                                                                                   | Ikke svart                                                                                                                                                                                                              | 0       |         |
| 98                                                                                                                                   | Ikke spurt                                                                                                                                                                                                              | 4579    | 97.7%   |
| Advarsel: disse tallene indikerer antall enheter (cases) i datafilen. De kan ikke tolkes som oppsummert statistikk for populasjonen. |                                                                                                                                                                                                                         |         |         |
| # r7ocreasm2b3: I hvilken grad kan domstolen avskaffes, dersom Høyesterett tar mange valg folk er uenige i?                          |                                                                                                                                                                                                                         |         |         |
| Informasjon                                                                                                                          | [Type= diskret] [Format=numeric] [Rekkevidde= 0-50] [Missing=*]                                                                                                                                                         |         |         |
| Statistikk [NW/ W]                                                                                                                   | [Gyldige=4689 /-] [Ugyldige=0 /-]                                                                                                                                                                                       |         |         |
| Spørsmålstekst                                                                                                                       | Og i hvilken grad mener du at dersom Norges Høyesterett begynner å ta mange avgjørelser som folk flest er uenige i, kan det være like greit å avskaffe domstolen fullstendig?                                           |         |         |
| Instruksjoner til intervjueren                                                                                                       | [Spurt hvis u=2, ran20=2 og R7OCRECSM_mobil=0. Versjon for PC -og nettbrettbrukere. Mobilbrukere blir spurt R7OCRECSM2B3_mobile.]<br><br>[Slider blir brukt for å avgi svar. Utgangsposisjonen er satt til verdien 25.] |         |         |
| Kommentarer                                                                                                                          | Og i hvilken grad mener du at dersom Norges Høyesterett begynner å ta mange avgjørelser som folk flest er uenige i, ka                                                                                                  |         |         |

# r7ocreasm2b3: I hvilken grad kan domstolen avskaffes, dersom Høyesterett tar mange valg folk er uenige i?

| Verdi | Merkelapp            | Enheter | Prosent |
|-------|----------------------|---------|---------|
| 0     | Ikke i det hele tatt | 59      | 1.3%    |
| 1     | 1                    | 9       | 0.2%    |
| 2     | 2                    | 11      | 0.2%    |
| 3     | 3                    | 8       | 0.2%    |
| 4     | 4                    | 8       | 0.2%    |
| 5     | 5                    | 7       | 0.1%    |
| 6     | 6                    | 5       | 0.1%    |
| 7     | 7                    | 5       | 0.1%    |
| 8     | 8                    | 6       | 0.1%    |
| 9     | 9                    | 9       | 0.2%    |
| 10    | 10                   | 8       | 0.2%    |
| 11    | 11                   | 6       | 0.1%    |
| 12    | 12                   | 8       | 0.2%    |
| 13    | 13                   | 4       | 0.1%    |
| 14    | 14                   | 2       | 0.0%    |
| 15    | 15                   | 5       | 0.1%    |
| 16    | 16                   | 4       | 0.1%    |
| 17    | 17                   | 4       | 0.1%    |
| 18    | 18                   | 5       | 0.1%    |
| 19    | 19                   | 6       | 0.1%    |
| 20    | 20                   | 4       | 0.1%    |
| 21    | 21                   | 8       | 0.2%    |
| 22    | 22                   | 3       | 0.1%    |
| 23    | 23                   | 2       | 0.0%    |
| 24    | 24                   | 4       | 0.1%    |
| 25    | 25                   | 52      | 1.1%    |
| 26    | 26                   | 3       | 0.1%    |
| 27    | 27                   | 3       | 0.1%    |
| 28    | 28                   | 3       | 0.1%    |
| 29    | 29                   | 1       | 0.0%    |
| 30    | 30                   | 4       | 0.1%    |
| 31    | 31                   | 3       | 0.1%    |
| 32    | 32                   | 4       | 0.1%    |
| 33    | 33                   | 3       | 0.1%    |
| 34    | 34                   | 3       | 0.1%    |
| 35    | 35                   | 4       | 0.1%    |
| 36    | 36                   | 4       | 0.1%    |
| 37    | 37                   | 1       | 0.0%    |
| 38    | 38                   | 0       |         |
| 39    | 39                   | 0       |         |
| 40    | 40                   | 1       | 0.0%    |
| 41    | 41                   | 3       | 0.1%    |
| 42    | 42                   | 0       |         |
| 43    | 43                   | 2       | 0.0%    |
| 44    | 44                   | 0       |         |

### # r7ocreasm2b3: I hvilken grad kan domstolen avskaffes, dersom Høyesterett tar mange valg folk er uenige i?

| Verdi | Merkelapp   | Enheter | Prosent |
|-------|-------------|---------|---------|
| 45    | 45          | 0       |         |
| 46    | 46          | 0       |         |
| 47    | 47          | 2       | 0.0%    |
| 48    | 48          | 0       |         |
| 49    | 49          | 0       |         |
| 50    | Fullstendig | 4       | 0.1%    |
| 97    | Ikke svart  | 0       |         |
| 98    | Ikke spurt  | 4389    | 93.6%   |

Advarsel: disse tallene indikerer antall enheter (cases) i datafilen. De kan ikke tolkes som oppsummert statistikk for populasjonen.

### # r7ocreasm2b3\_mobile: I hvilken grad kan domstolen avskaffes, dersom Høyesterett tar mange valg folk er uenige i?

|                                       |                                                                                                                                                                                                                                      |
|---------------------------------------|--------------------------------------------------------------------------------------------------------------------------------------------------------------------------------------------------------------------------------------|
| <b>Informasjon</b>                    | [Type= diskret] [Format=numeric] [Rekkevidde= 0-50] [Missing=*]                                                                                                                                                                      |
| <b>Statistikk [NW/ W]</b>             | [Gyldige=4689 /-] [Ugyldig=0 /-]                                                                                                                                                                                                     |
| <b>Spørsmålstekst</b>                 | Og i hvilken grad mener du at dersom Norges Høyesterett begynner å ta mange avgjørelser som folk flest er uenige i, kan det være like greit å avskaffe domstolen fullstendig?                                                        |
| <b>Instruksjoner til intervjueren</b> | [Spurt hvis u=2, ran20=2 og R7OCRECSM_mobil=1. Versjon for mobilbrukere på grunn av oppsett. PC- og nettbrettbrukere blir spurt R7OCRECSM2B3.]<br><br>[Slider blir brukt for å avgi svar. Utgangsposisjonen er satt til verdien 25.] |
| <b>Kommentarer</b>                    | Og i hvilken grad mener du at dersom Norges Høyesterett begynner å ta mange avgjørelser som folk flest er uenige i, ka                                                                                                               |

| Verdi | Merkelapp            | Enheter | Prosent |
|-------|----------------------|---------|---------|
| 0     | Ikke i det hele tatt | 25      | 0.5%    |
| 1     | 1                    | 0       |         |
| 2     | 2                    | 4       | 0.1%    |
| 3     | 3                    | 3       | 0.1%    |
| 4     | 4                    | 1       | 0.0%    |
| 5     | 5                    | 1       | 0.0%    |
| 6     | 6                    | 5       | 0.1%    |
| 7     | 7                    | 1       | 0.0%    |
| 8     | 8                    | 2       | 0.0%    |
| 9     | 9                    | 2       | 0.0%    |
| 10    | 10                   | 5       | 0.1%    |
| 11    | 11                   | 2       | 0.0%    |
| 12    | 12                   | 1       | 0.0%    |
| 13    | 13                   | 1       | 0.0%    |
| 14    | 14                   | 2       | 0.0%    |
| 15    | 15                   | 1       | 0.0%    |
| 16    | 16                   | 2       | 0.0%    |
| 17    | 17                   | 2       | 0.0%    |
| 18    | 18                   | 0       |         |
| 19    | 19                   | 1       | 0.0%    |
| 20    | 20                   | 1       | 0.0%    |
| 21    | 21                   | 3       | 0.1%    |
| 22    | 22                   | 0       |         |
| 23    | 23                   | 0       |         |
| 24    | 24                   | 2       | 0.0%    |

### # r7ocreasm2b3\_mobile: I hvilken grad kan domstolen avskaffes, dersom Høyesterett tar mange valg folk er uenige i?

| Verdi | Merkelapp   | Enheter | Prosent |
|-------|-------------|---------|---------|
| 25    | 25          | 25      | 0.5%    |
| 26    | 26          | 0       |         |
| 27    | 27          | 0       |         |
| 28    | 28          | 1       | 0.0%    |
| 29    | 29          | 0       |         |
| 30    | 30          | 1       | 0.0%    |
| 31    | 31          | 1       | 0.0%    |
| 32    | 32          | 1       | 0.0%    |
| 33    | 33          | 2       | 0.0%    |
| 34    | 34          | 2       | 0.0%    |
| 35    | 35          | 0       |         |
| 36    | 36          | 3       | 0.1%    |
| 37    | 37          | 0       |         |
| 38    | 38          | 0       |         |
| 39    | 39          | 1       | 0.0%    |
| 40    | 40          | 0       |         |
| 41    | 41          | 0       |         |
| 42    | 42          | 0       |         |
| 43    | 43          | 0       |         |
| 44    | 44          | 0       |         |
| 45    | 45          | 1       | 0.0%    |
| 46    | 46          | 1       | 0.0%    |
| 47    | 47          | 0       |         |
| 48    | 48          | 0       |         |
| 49    | 49          | 0       |         |
| 50    | Fullstendig | 4       | 0.1%    |
| 97    | Ikke svart  | 0       |         |
| 98    | Ikke spurt  | 4579    | 97.7%   |

Advarsel: disse tallene indikerer antall enheter (cases) i datafilen. De kan ikke tolkes som oppsummert statistikk for populasjonen.

### # r7ocreasm2c1: I hvilken grad bør Høyesteretts makt i kontroversielle saker reduseres?

|                                       |                                                                                                                                                                                                                        |
|---------------------------------------|------------------------------------------------------------------------------------------------------------------------------------------------------------------------------------------------------------------------|
| <b>Informasjon</b>                    | [Type= diskret] [Format=numeric] [Rekkevidde= 0-50] [Missing=*]                                                                                                                                                        |
| <b>Statistikk [NW/ W]</b>             | [Gyldige=4689 /-] [Ugyldig=0 /-]                                                                                                                                                                                       |
| <b>Spørsmålstekst</b>                 | Generelt sett, i hvilken grad mener du at Norges Høyesteretts makt til å avgjøre visse typer kontroversielle saker bør reduseres?                                                                                      |
| <b>Instruksjoner til intervjueren</b> | [Spurt hvis u=2, ran20=3 og R7OCRECSM_mobil=0. Versjon for PC -og nettbrettbrukere. Mobilbrukere blir spurt R7OCRECSM2C1_mobile.]<br><br>[Slider blir brukt for å avgi svar. Utgangsposisjonen er satt til verdien 1.] |
| <b>Kommentarer</b>                    | Generelt sett, i hvilken grad mener du at Norges Høyesteretts makt til å avgjøre visse typer kontroversielle saker b                                                                                                   |

| Verdi | Merkelapp            | Enheter | Prosent |
|-------|----------------------|---------|---------|
| 0     | Ikke i det hele tatt | 8       | 0.2%    |
| 1     | 1                    | 133     | 2.8%    |
| 2     | 2                    | 6       | 0.1%    |
| 3     | 3                    | 1       | 0.0%    |
| 4     | 4                    | 9       | 0.2%    |

# r7ocrecsm2c1: I hvilken grad bør Høyesteretts makt i kontroversielle saker reduseres?

| Verdi | Merkelapp | Enheter | Prosent |
|-------|-----------|---------|---------|
| 5     | 5         | 7       | 0.1%    |
| 6     | 6         | 3       | 0.1%    |
| 7     | 7         | 5       | 0.1%    |
| 8     | 8         | 3       | 0.1%    |
| 9     | 9         | 6       | 0.1%    |
| 10    | 10        | 5       | 0.1%    |
| 11    | 11        | 5       | 0.1%    |
| 12    | 12        | 3       | 0.1%    |
| 13    | 13        | 4       | 0.1%    |
| 14    | 14        | 5       | 0.1%    |
| 15    | 15        | 2       | 0.0%    |
| 16    | 16        | 3       | 0.1%    |
| 17    | 17        | 0       |         |
| 18    | 18        | 1       | 0.0%    |
| 19    | 19        | 0       |         |
| 20    | 20        | 2       | 0.0%    |
| 21    | 21        | 1       | 0.0%    |
| 22    | 22        | 2       | 0.0%    |
| 23    | 23        | 1       | 0.0%    |
| 24    | 24        | 25      | 0.5%    |
| 25    | 25        | 33      | 0.7%    |
| 26    | 26        | 8       | 0.2%    |
| 27    | 27        | 1       | 0.0%    |
| 28    | 28        | 1       | 0.0%    |
| 29    | 29        | 4       | 0.1%    |
| 30    | 30        | 1       | 0.0%    |
| 31    | 31        | 2       | 0.0%    |
| 32    | 32        | 0       |         |
| 33    | 33        | 1       | 0.0%    |
| 34    | 34        | 1       | 0.0%    |
| 35    | 35        | 0       |         |
| 36    | 36        | 2       | 0.0%    |
| 37    | 37        | 2       | 0.0%    |
| 38    | 38        | 2       | 0.0%    |
| 39    | 39        | 0       |         |
| 40    | 40        | 1       | 0.0%    |
| 41    | 41        | 0       |         |
| 42    | 42        | 1       | 0.0%    |
| 43    | 43        | 0       |         |
| 44    | 44        | 1       | 0.0%    |
| 45    | 45        | 0       |         |
| 46    | 46        | 0       |         |
| 47    | 47        | 2       | 0.0%    |
| 48    | 48        | 0       |         |
| 49    | 49        | 2       | 0.0%    |



| # r7ocreasm2c1: I hvilken grad bør Høyesteretts makt i kontroversielle saker reduseres?                                              |                                                                                                                                                                                                                                            |         |         |
|--------------------------------------------------------------------------------------------------------------------------------------|--------------------------------------------------------------------------------------------------------------------------------------------------------------------------------------------------------------------------------------------|---------|---------|
| Verdi                                                                                                                                | Merkelapp                                                                                                                                                                                                                                  | Enheter | Prosent |
| 50                                                                                                                                   | Fullstendig                                                                                                                                                                                                                                | 0       |         |
| 97                                                                                                                                   | Ikke svart                                                                                                                                                                                                                                 | 0       |         |
| 98                                                                                                                                   | Ikke spurt                                                                                                                                                                                                                                 | 4384    | 93.5%   |
| Advarsel: disse tallene indikerer antall enheter (cases) i datafilen. De kan ikke tolkes som oppsummert statistikk for populasjonen. |                                                                                                                                                                                                                                            |         |         |
| # r7ocreasm2c1_mobile: I hvilken grad bør Høyesteretts makt i kontroversielle saker reduseres?                                       |                                                                                                                                                                                                                                            |         |         |
| Informasjon                                                                                                                          | [Type= diskret] [Format=numeric] [Rekkevidde= 0-50] [Missing=*]                                                                                                                                                                            |         |         |
| Statistikk [NW/ W]                                                                                                                   | [Gyldige=4689 /-] [Ugyldig=0 /-]                                                                                                                                                                                                           |         |         |
| Spørsmålstekst                                                                                                                       | Generelt sett, i hvilken grad mener du at Norges Høyesteretts makt til å avgjøre visse typer kontroversielle saker bør reduseres?                                                                                                          |         |         |
| Instruksjoner til intervjueren                                                                                                       | <p>[Spurt hvis u=2, ran20=3 og R7OCRECSM_mobil=1. Versjon for mobilbrukere på grunn av oppsett. PC- og nettbrettbrukere blir spurt R7OCRECSM2C1.]</p> <p>[Slider blir brukt for å avgi svar. Utgangsposisjonen er satt til verdien 1.]</p> |         |         |
| Kommentarer                                                                                                                          | Generelt sett, i hvilken grad mener du at Norges Høyesteretts makt til å avgjøre visse typer kontroversielle saker b                                                                                                                       |         |         |
| Verdi                                                                                                                                | Merkelapp                                                                                                                                                                                                                                  | Enheter | Prosent |
| 0                                                                                                                                    | Ikke i det hele tatt                                                                                                                                                                                                                       | 4       | 0.1%    |
| 1                                                                                                                                    | 1                                                                                                                                                                                                                                          | 49      | 1.0%    |
| 2                                                                                                                                    | 2                                                                                                                                                                                                                                          | 1       | 0.0%    |
| 3                                                                                                                                    | 3                                                                                                                                                                                                                                          | 0       |         |
| 4                                                                                                                                    | 4                                                                                                                                                                                                                                          | 0       |         |
| 5                                                                                                                                    | 5                                                                                                                                                                                                                                          | 0       |         |
| 6                                                                                                                                    | 6                                                                                                                                                                                                                                          | 0       |         |
| 7                                                                                                                                    | 7                                                                                                                                                                                                                                          | 3       | 0.1%    |
| 8                                                                                                                                    | 8                                                                                                                                                                                                                                          | 0       |         |
| 9                                                                                                                                    | 9                                                                                                                                                                                                                                          | 0       |         |
| 10                                                                                                                                   | 10                                                                                                                                                                                                                                         | 1       | 0.0%    |
| 11                                                                                                                                   | 11                                                                                                                                                                                                                                         | 0       |         |
| 12                                                                                                                                   | 12                                                                                                                                                                                                                                         | 1       | 0.0%    |
| 13                                                                                                                                   | 13                                                                                                                                                                                                                                         | 2       | 0.0%    |
| 14                                                                                                                                   | 14                                                                                                                                                                                                                                         | 1       | 0.0%    |
| 15                                                                                                                                   | 15                                                                                                                                                                                                                                         | 2       | 0.0%    |
| 16                                                                                                                                   | 16                                                                                                                                                                                                                                         | 0       |         |
| 17                                                                                                                                   | 17                                                                                                                                                                                                                                         | 0       |         |
| 18                                                                                                                                   | 18                                                                                                                                                                                                                                         | 2       | 0.0%    |
| 19                                                                                                                                   | 19                                                                                                                                                                                                                                         | 0       |         |
| 20                                                                                                                                   | 20                                                                                                                                                                                                                                         | 1       | 0.0%    |
| 21                                                                                                                                   | 21                                                                                                                                                                                                                                         | 3       | 0.1%    |
| 22                                                                                                                                   | 22                                                                                                                                                                                                                                         | 0       |         |
| 23                                                                                                                                   | 23                                                                                                                                                                                                                                         | 3       | 0.1%    |
| 24                                                                                                                                   | 24                                                                                                                                                                                                                                         | 1       | 0.0%    |
| 25                                                                                                                                   | 25                                                                                                                                                                                                                                         | 0       |         |
| 26                                                                                                                                   | 26                                                                                                                                                                                                                                         | 2       | 0.0%    |
| 27                                                                                                                                   | 27                                                                                                                                                                                                                                         | 4       | 0.1%    |
| 28                                                                                                                                   | 28                                                                                                                                                                                                                                         | 3       | 0.1%    |
| 29                                                                                                                                   | 29                                                                                                                                                                                                                                         | 9       | 0.2%    |

| # r7ocreasm2c1_mobile: I hvilken grad bør Høyesteretts makt i kontroversielle saker reduseres?                                       |                                                                                                                                                                                                                        |         |         |
|--------------------------------------------------------------------------------------------------------------------------------------|------------------------------------------------------------------------------------------------------------------------------------------------------------------------------------------------------------------------|---------|---------|
| Verdi                                                                                                                                | Merkelapp                                                                                                                                                                                                              | Enheter | Prosent |
| 30                                                                                                                                   | 30                                                                                                                                                                                                                     | 4       | 0.1%    |
| 31                                                                                                                                   | 31                                                                                                                                                                                                                     | 2       | 0.0%    |
| 32                                                                                                                                   | 32                                                                                                                                                                                                                     | 2       | 0.0%    |
| 33                                                                                                                                   | 33                                                                                                                                                                                                                     | 2       | 0.0%    |
| 34                                                                                                                                   | 34                                                                                                                                                                                                                     | 1       | 0.0%    |
| 35                                                                                                                                   | 35                                                                                                                                                                                                                     | 1       | 0.0%    |
| 36                                                                                                                                   | 36                                                                                                                                                                                                                     | 0       |         |
| 37                                                                                                                                   | 37                                                                                                                                                                                                                     | 0       |         |
| 38                                                                                                                                   | 38                                                                                                                                                                                                                     | 0       |         |
| 39                                                                                                                                   | 39                                                                                                                                                                                                                     | 0       |         |
| 40                                                                                                                                   | 40                                                                                                                                                                                                                     | 0       |         |
| 41                                                                                                                                   | 41                                                                                                                                                                                                                     | 0       |         |
| 42                                                                                                                                   | 42                                                                                                                                                                                                                     | 0       |         |
| 43                                                                                                                                   | 43                                                                                                                                                                                                                     | 1       | 0.0%    |
| 44                                                                                                                                   | 44                                                                                                                                                                                                                     | 0       |         |
| 45                                                                                                                                   | 45                                                                                                                                                                                                                     | 2       | 0.0%    |
| 46                                                                                                                                   | 46                                                                                                                                                                                                                     | 1       | 0.0%    |
| 47                                                                                                                                   | 47                                                                                                                                                                                                                     | 0       |         |
| 48                                                                                                                                   | 48                                                                                                                                                                                                                     | 0       |         |
| 49                                                                                                                                   | 49                                                                                                                                                                                                                     | 0       |         |
| 50                                                                                                                                   | Fullstendig                                                                                                                                                                                                            | 4       | 0.1%    |
| 97                                                                                                                                   | Ikke svart                                                                                                                                                                                                             | 0       |         |
| 98                                                                                                                                   | Ikke spurt                                                                                                                                                                                                             | 4577    | 97.6%   |
| Advarsel: disse tallene indikerer antall enheter (cases) i datafilen. De kan ikke tolkes som oppsummert statistikk for populasjonen. |                                                                                                                                                                                                                        |         |         |
| # r7ocreasm2c2: I hvilken grad favoriserer Høyesterett enkelte grupper?                                                              |                                                                                                                                                                                                                        |         |         |
| Informasjon                                                                                                                          | [Type= diskret] [Format=numeric] [Rekkevidde= 0-50] [Missing=*]                                                                                                                                                        |         |         |
| Statistikk [NW/ W]                                                                                                                   | [Gyldige=4689 /-] [Ugyldig=0 /-]                                                                                                                                                                                       |         |         |
| Spørsmålstekst                                                                                                                       | I hvilken grad mener du at avgjørelsene til Norges Høyesterett favoriserer enkelte grupper mer enn andre?                                                                                                              |         |         |
| Instruksjoner til intervjueren                                                                                                       | [Spurt hvis u=2, ran20=3 og R7OCRECSM_mobil=0. Versjon for PC -og nettbrettbrukere. Mobilbrukere blir spurt R7OCRECSM2C2_mobile.]<br><br>[Slider blir brukt for å avgi svar. Utgangsposisjonen er satt til verdien 1.] |         |         |
| Kommentarer                                                                                                                          | I hvilken grad mener du at avgjørelsene til Norges Høyesterett favoriserer enkelte grupper mer enn andre? ^f('R7OCREC                                                                                                  |         |         |
| Verdi                                                                                                                                | Merkelapp                                                                                                                                                                                                              | Enheter | Prosent |
| 0                                                                                                                                    | Ikke i det hele tatt                                                                                                                                                                                                   | 6       | 0.1%    |
| 1                                                                                                                                    | 1                                                                                                                                                                                                                      | 113     | 2.4%    |
| 2                                                                                                                                    | 2                                                                                                                                                                                                                      | 3       | 0.1%    |
| 3                                                                                                                                    | 3                                                                                                                                                                                                                      | 4       | 0.1%    |
| 4                                                                                                                                    | 4                                                                                                                                                                                                                      | 5       | 0.1%    |
| 5                                                                                                                                    | 5                                                                                                                                                                                                                      | 9       | 0.2%    |
| 6                                                                                                                                    | 6                                                                                                                                                                                                                      | 4       | 0.1%    |
| 7                                                                                                                                    | 7                                                                                                                                                                                                                      | 4       | 0.1%    |
| 8                                                                                                                                    | 8                                                                                                                                                                                                                      | 2       | 0.0%    |
| 9                                                                                                                                    | 9                                                                                                                                                                                                                      | 10      | 0.2%    |
| 10                                                                                                                                   | 10                                                                                                                                                                                                                     | 5       | 0.1%    |

| # r7ocreasm2c2: I hvilken grad favoriserer Høyesterett enkelte grupper?                                                              |                                                                 |         |         |
|--------------------------------------------------------------------------------------------------------------------------------------|-----------------------------------------------------------------|---------|---------|
| Verdi                                                                                                                                | Merkelapp                                                       | Enheter | Prosent |
| 11                                                                                                                                   | 11                                                              | 5       | 0.1%    |
| 12                                                                                                                                   | 12                                                              | 8       | 0.2%    |
| 13                                                                                                                                   | 13                                                              | 4       | 0.1%    |
| 14                                                                                                                                   | 14                                                              | 2       | 0.0%    |
| 15                                                                                                                                   | 15                                                              | 2       | 0.0%    |
| 16                                                                                                                                   | 16                                                              | 1       | 0.0%    |
| 17                                                                                                                                   | 17                                                              | 2       | 0.0%    |
| 18                                                                                                                                   | 18                                                              | 4       | 0.1%    |
| 19                                                                                                                                   | 19                                                              | 4       | 0.1%    |
| 20                                                                                                                                   | 20                                                              | 0       |         |
| 21                                                                                                                                   | 21                                                              | 2       | 0.0%    |
| 22                                                                                                                                   | 22                                                              | 0       |         |
| 23                                                                                                                                   | 23                                                              | 3       | 0.1%    |
| 24                                                                                                                                   | 24                                                              | 24      | 0.5%    |
| 25                                                                                                                                   | 25                                                              | 35      | 0.7%    |
| 26                                                                                                                                   | 26                                                              | 1       | 0.0%    |
| 27                                                                                                                                   | 27                                                              | 5       | 0.1%    |
| 28                                                                                                                                   | 28                                                              | 1       | 0.0%    |
| 29                                                                                                                                   | 29                                                              | 3       | 0.1%    |
| 30                                                                                                                                   | 30                                                              | 5       | 0.1%    |
| 31                                                                                                                                   | 31                                                              | 2       | 0.0%    |
| 32                                                                                                                                   | 32                                                              | 2       | 0.0%    |
| 33                                                                                                                                   | 33                                                              | 2       | 0.0%    |
| 34                                                                                                                                   | 34                                                              | 3       | 0.1%    |
| 35                                                                                                                                   | 35                                                              | 6       | 0.1%    |
| 36                                                                                                                                   | 36                                                              | 1       | 0.0%    |
| 37                                                                                                                                   | 37                                                              | 2       | 0.0%    |
| 38                                                                                                                                   | 38                                                              | 2       | 0.0%    |
| 39                                                                                                                                   | 39                                                              | 1       | 0.0%    |
| 40                                                                                                                                   | 40                                                              | 0       |         |
| 41                                                                                                                                   | 41                                                              | 2       | 0.0%    |
| 42                                                                                                                                   | 42                                                              | 0       |         |
| 43                                                                                                                                   | 43                                                              | 1       | 0.0%    |
| 44                                                                                                                                   | 44                                                              | 0       |         |
| 45                                                                                                                                   | 45                                                              | 0       |         |
| 46                                                                                                                                   | 46                                                              | 1       | 0.0%    |
| 47                                                                                                                                   | 47                                                              | 1       | 0.0%    |
| 48                                                                                                                                   | 48                                                              | 1       | 0.0%    |
| 49                                                                                                                                   | 49                                                              | 0       |         |
| 50                                                                                                                                   | Fullstendig                                                     | 2       | 0.0%    |
| 97                                                                                                                                   | Ikke svart                                                      | 0       |         |
| 98                                                                                                                                   | Ikke spurt                                                      | 4384    | 93.5%   |
| Advarsel: disse tallene indikerer antall enheter (cases) i datafilen. De kan ikke tolkes som oppsummert statistikk for populasjonen. |                                                                 |         |         |
| # r7ocreasm2c2_mobile: I hvilken grad favoriserer Høyesterett enkelte grupper?                                                       |                                                                 |         |         |
| Informasjon                                                                                                                          | [Type= diskret] [Format=numeric] [Rekkevidde= 0-50] [Missing=*] |         |         |

| # r7ocreasm2c2_mobile: I hvilken grad favoriserer Høyesterett enkelte grupper? |                                                                                                                                                                                                                                            |         |         |
|--------------------------------------------------------------------------------|--------------------------------------------------------------------------------------------------------------------------------------------------------------------------------------------------------------------------------------------|---------|---------|
| <b>Statistikk [NW/ W]</b>                                                      | [Gyldige=4689 /-] [Ugyldig=0 /-]                                                                                                                                                                                                           |         |         |
| <b>Spørsmålstekst</b>                                                          | I hvilken grad mener du at avgjørelsene til Norges Høyesterett favoriserer enkelte grupper mer enn andre?                                                                                                                                  |         |         |
| <b>Instruksjoner til intervjueren</b>                                          | <p>[Spurt hvis u=2, ran20=3 og R7OCRECSM_mobil=1. Versjon for mobilbrukere på grunn av oppsett. PC- og nettbrettbrukere blir spurt R7OCRECSM2C2.]</p> <p>[Slider blir brukt for å avgi svar. Utgangsposisjonen er satt til verdien 1.]</p> |         |         |
| <b>Kommentarer</b>                                                             | I hvilken grad mener du at avgjørelsene til Norges Høyesterett favoriserer enkelte grupper mer enn andre?                                                                                                                                  |         |         |
| Verdi                                                                          | Merkelapp                                                                                                                                                                                                                                  | Enheter | Prosent |
| 0                                                                              | Ikke i det hele tatt                                                                                                                                                                                                                       | 3       | 0.1%    |
| 1                                                                              | 1                                                                                                                                                                                                                                          | 45      | 1.0%    |
| 2                                                                              | 2                                                                                                                                                                                                                                          | 1       | 0.0%    |
| 3                                                                              | 3                                                                                                                                                                                                                                          | 0       |         |
| 4                                                                              | 4                                                                                                                                                                                                                                          | 1       | 0.0%    |
| 5                                                                              | 5                                                                                                                                                                                                                                          | 2       | 0.0%    |
| 6                                                                              | 6                                                                                                                                                                                                                                          | 3       | 0.1%    |
| 7                                                                              | 7                                                                                                                                                                                                                                          | 1       | 0.0%    |
| 8                                                                              | 8                                                                                                                                                                                                                                          | 0       |         |
| 9                                                                              | 9                                                                                                                                                                                                                                          | 0       |         |
| 10                                                                             | 10                                                                                                                                                                                                                                         | 1       | 0.0%    |
| 11                                                                             | 11                                                                                                                                                                                                                                         | 1       | 0.0%    |
| 12                                                                             | 12                                                                                                                                                                                                                                         | 0       |         |
| 13                                                                             | 13                                                                                                                                                                                                                                         | 0       |         |
| 14                                                                             | 14                                                                                                                                                                                                                                         | 0       |         |
| 15                                                                             | 15                                                                                                                                                                                                                                         | 0       |         |
| 16                                                                             | 16                                                                                                                                                                                                                                         | 2       | 0.0%    |
| 17                                                                             | 17                                                                                                                                                                                                                                         | 1       | 0.0%    |
| 18                                                                             | 18                                                                                                                                                                                                                                         | 4       | 0.1%    |
| 19                                                                             | 19                                                                                                                                                                                                                                         | 2       | 0.0%    |
| 20                                                                             | 20                                                                                                                                                                                                                                         | 2       | 0.0%    |
| 21                                                                             | 21                                                                                                                                                                                                                                         | 1       | 0.0%    |
| 22                                                                             | 22                                                                                                                                                                                                                                         | 0       |         |
| 23                                                                             | 23                                                                                                                                                                                                                                         | 0       |         |
| 24                                                                             | 24                                                                                                                                                                                                                                         | 2       | 0.0%    |
| 25                                                                             | 25                                                                                                                                                                                                                                         | 2       | 0.0%    |
| 26                                                                             | 26                                                                                                                                                                                                                                         | 0       |         |
| 27                                                                             | 27                                                                                                                                                                                                                                         | 3       | 0.1%    |
| 28                                                                             | 28                                                                                                                                                                                                                                         | 4       | 0.1%    |
| 29                                                                             | 29                                                                                                                                                                                                                                         | 2       | 0.0%    |
| 30                                                                             | 30                                                                                                                                                                                                                                         | 8       | 0.2%    |
| 31                                                                             | 31                                                                                                                                                                                                                                         | 6       | 0.1%    |
| 32                                                                             | 32                                                                                                                                                                                                                                         | 1       | 0.0%    |
| 33                                                                             | 33                                                                                                                                                                                                                                         | 1       | 0.0%    |
| 34                                                                             | 34                                                                                                                                                                                                                                         | 0       |         |
| 35                                                                             | 35                                                                                                                                                                                                                                         | 2       | 0.0%    |
| 36                                                                             | 36                                                                                                                                                                                                                                         | 2       | 0.0%    |
| 37                                                                             | 37                                                                                                                                                                                                                                         | 0       |         |

| # r7ocreasm2c2_mobile: I hvilken grad favoriserer Høyesterett enkelte grupper?                                                       |                                                                                                                                                                                                                        |         |         |
|--------------------------------------------------------------------------------------------------------------------------------------|------------------------------------------------------------------------------------------------------------------------------------------------------------------------------------------------------------------------|---------|---------|
| Verdi                                                                                                                                | Merkelapp                                                                                                                                                                                                              | Enheter | Prosent |
| 38                                                                                                                                   | 38                                                                                                                                                                                                                     | 2       | 0.0%    |
| 39                                                                                                                                   | 39                                                                                                                                                                                                                     | 1       | 0.0%    |
| 40                                                                                                                                   | 40                                                                                                                                                                                                                     | 0       |         |
| 41                                                                                                                                   | 41                                                                                                                                                                                                                     | 1       | 0.0%    |
| 42                                                                                                                                   | 42                                                                                                                                                                                                                     | 0       |         |
| 43                                                                                                                                   | 43                                                                                                                                                                                                                     | 1       | 0.0%    |
| 44                                                                                                                                   | 44                                                                                                                                                                                                                     | 1       | 0.0%    |
| 45                                                                                                                                   | 45                                                                                                                                                                                                                     | 0       |         |
| 46                                                                                                                                   | 46                                                                                                                                                                                                                     | 0       |         |
| 47                                                                                                                                   | 47                                                                                                                                                                                                                     | 0       |         |
| 48                                                                                                                                   | 48                                                                                                                                                                                                                     | 0       |         |
| 49                                                                                                                                   | 49                                                                                                                                                                                                                     | 0       |         |
| 50                                                                                                                                   | Fullstendig                                                                                                                                                                                                            | 3       | 0.1%    |
| 97                                                                                                                                   | Ikke svart                                                                                                                                                                                                             | 0       |         |
| 98                                                                                                                                   | Ikke spurt                                                                                                                                                                                                             | 4577    | 97.6%   |
| Advarsel: disse tallene indikerer antall enheter (cases) i datafilen. De kan ikke tolkes som oppsummert statistikk for populasjonen. |                                                                                                                                                                                                                        |         |         |
| # r7ocreasm2c3: I hvilken grad kan domstolen avskaffes, dersom Høyesterett tar mange valg folk er uenige i?                          |                                                                                                                                                                                                                        |         |         |
| Informasjon                                                                                                                          | [Type= diskret] [Format=numeric] [Rekkevidde= 0-50] [Missing=*]                                                                                                                                                        |         |         |
| Statistikk [NW/ W]                                                                                                                   | [Gyldige=4689 /-] [Ugyldig=0 /-]                                                                                                                                                                                       |         |         |
| Spørsmålstekst                                                                                                                       | Og i hvilken grad mener du at dersom Norges Høyesterett begynner å ta mange avgjørelser som folk flest er uenige i, kan det være like greit å avskaffe domstolen fullstendig?                                          |         |         |
| Instruksjoner til intervjueren                                                                                                       | [Spurt hvis u=2, ran20=3 og R7OCRECSM_mobil=0. Versjon for PC -og nettbrettbrukere. Mobilbrukere blir spurt R7OCRECSM2C3_mobile.]<br><br>[Slider blir brukt for å avgi svar. Utgangsposisjonen er satt til verdien 1.] |         |         |
| Kommentarer                                                                                                                          | Og i hvilken grad mener du at dersom Norges Høyesterett begynner å ta mange avgjørelser som folk flest er uenige i, ka                                                                                                 |         |         |
| Verdi                                                                                                                                | Merkelapp                                                                                                                                                                                                              | Enheter | Prosent |
| 0                                                                                                                                    | Ikke i det hele tatt                                                                                                                                                                                                   | 10      | 0.2%    |
| 1                                                                                                                                    | 1                                                                                                                                                                                                                      | 156     | 3.3%    |
| 2                                                                                                                                    | 2                                                                                                                                                                                                                      | 9       | 0.2%    |
| 3                                                                                                                                    | 3                                                                                                                                                                                                                      | 2       | 0.0%    |
| 4                                                                                                                                    | 4                                                                                                                                                                                                                      | 4       | 0.1%    |
| 5                                                                                                                                    | 5                                                                                                                                                                                                                      | 4       | 0.1%    |
| 6                                                                                                                                    | 6                                                                                                                                                                                                                      | 7       | 0.1%    |
| 7                                                                                                                                    | 7                                                                                                                                                                                                                      | 5       | 0.1%    |
| 8                                                                                                                                    | 8                                                                                                                                                                                                                      | 3       | 0.1%    |
| 9                                                                                                                                    | 9                                                                                                                                                                                                                      | 2       | 0.0%    |
| 10                                                                                                                                   | 10                                                                                                                                                                                                                     | 3       | 0.1%    |
| 11                                                                                                                                   | 11                                                                                                                                                                                                                     | 6       | 0.1%    |
| 12                                                                                                                                   | 12                                                                                                                                                                                                                     | 3       | 0.1%    |
| 13                                                                                                                                   | 13                                                                                                                                                                                                                     | 3       | 0.1%    |
| 14                                                                                                                                   | 14                                                                                                                                                                                                                     | 2       | 0.0%    |
| 15                                                                                                                                   | 15                                                                                                                                                                                                                     | 4       | 0.1%    |
| 16                                                                                                                                   | 16                                                                                                                                                                                                                     | 0       |         |
| 17                                                                                                                                   | 17                                                                                                                                                                                                                     | 1       | 0.0%    |

| # r7ocreasm2c3: I hvilken grad kan domstolen avskaffes, dersom Høyesterett tar mange valg folk er uenige i?                          |                                                                                                                                                                                                                                        |         |         |
|--------------------------------------------------------------------------------------------------------------------------------------|----------------------------------------------------------------------------------------------------------------------------------------------------------------------------------------------------------------------------------------|---------|---------|
| Verdi                                                                                                                                | Merkelapp                                                                                                                                                                                                                              | Enheter | Prosent |
| 18                                                                                                                                   | 18                                                                                                                                                                                                                                     | 2       | 0.0%    |
| 19                                                                                                                                   | 19                                                                                                                                                                                                                                     | 2       | 0.0%    |
| 20                                                                                                                                   | 20                                                                                                                                                                                                                                     | 0       |         |
| 21                                                                                                                                   | 21                                                                                                                                                                                                                                     | 1       | 0.0%    |
| 22                                                                                                                                   | 22                                                                                                                                                                                                                                     | 0       |         |
| 23                                                                                                                                   | 23                                                                                                                                                                                                                                     | 3       | 0.1%    |
| 24                                                                                                                                   | 24                                                                                                                                                                                                                                     | 6       | 0.1%    |
| 25                                                                                                                                   | 25                                                                                                                                                                                                                                     | 26      | 0.6%    |
| 26                                                                                                                                   | 26                                                                                                                                                                                                                                     | 4       | 0.1%    |
| 27                                                                                                                                   | 27                                                                                                                                                                                                                                     | 5       | 0.1%    |
| 28                                                                                                                                   | 28                                                                                                                                                                                                                                     | 3       | 0.1%    |
| 29                                                                                                                                   | 29                                                                                                                                                                                                                                     | 4       | 0.1%    |
| 30                                                                                                                                   | 30                                                                                                                                                                                                                                     | 1       | 0.0%    |
| 31                                                                                                                                   | 31                                                                                                                                                                                                                                     | 2       | 0.0%    |
| 32                                                                                                                                   | 32                                                                                                                                                                                                                                     | 2       | 0.0%    |
| 33                                                                                                                                   | 33                                                                                                                                                                                                                                     | 1       | 0.0%    |
| 34                                                                                                                                   | 34                                                                                                                                                                                                                                     | 2       | 0.0%    |
| 35                                                                                                                                   | 35                                                                                                                                                                                                                                     | 2       | 0.0%    |
| 36                                                                                                                                   | 36                                                                                                                                                                                                                                     | 1       | 0.0%    |
| 37                                                                                                                                   | 37                                                                                                                                                                                                                                     | 1       | 0.0%    |
| 38                                                                                                                                   | 38                                                                                                                                                                                                                                     | 2       | 0.0%    |
| 39                                                                                                                                   | 39                                                                                                                                                                                                                                     | 1       | 0.0%    |
| 40                                                                                                                                   | 40                                                                                                                                                                                                                                     | 2       | 0.0%    |
| 41                                                                                                                                   | 41                                                                                                                                                                                                                                     | 0       |         |
| 42                                                                                                                                   | 42                                                                                                                                                                                                                                     | 1       | 0.0%    |
| 43                                                                                                                                   | 43                                                                                                                                                                                                                                     | 0       |         |
| 44                                                                                                                                   | 44                                                                                                                                                                                                                                     | 2       | 0.0%    |
| 45                                                                                                                                   | 45                                                                                                                                                                                                                                     | 1       | 0.0%    |
| 46                                                                                                                                   | 46                                                                                                                                                                                                                                     | 1       | 0.0%    |
| 47                                                                                                                                   | 47                                                                                                                                                                                                                                     | 1       | 0.0%    |
| 48                                                                                                                                   | 48                                                                                                                                                                                                                                     | 0       |         |
| 49                                                                                                                                   | 49                                                                                                                                                                                                                                     | 1       | 0.0%    |
| 50                                                                                                                                   | Fullstendig                                                                                                                                                                                                                            | 1       | 0.0%    |
| 97                                                                                                                                   | Ikke svart                                                                                                                                                                                                                             | 0       |         |
| 98                                                                                                                                   | Ikke spurt                                                                                                                                                                                                                             | 4384    | 93.5%   |
| Advarsel: disse tallene indikerer antall enheter (cases) i datafilen. De kan ikke tolkes som oppsummert statistikk for populasjonen. |                                                                                                                                                                                                                                        |         |         |
| # r7ocreasm2c3_mobile: I hvilken grad kan domstolen avskaffes, dersom Høyesterett tar mange valg folk er uenige i?                   |                                                                                                                                                                                                                                        |         |         |
| Informasjon                                                                                                                          | [Type= diskret] [Format=numeric] [Rekkevidde= 0-50] [Missing=*]                                                                                                                                                                        |         |         |
| Statistikk [NW/ W]                                                                                                                   | [Gyldige=4689 /-] [Ugyldig=0 /-]                                                                                                                                                                                                       |         |         |
| Spørsmålstekst                                                                                                                       | Og i hvilken grad mener du at dersom Norges Høyesterett begynner å ta mange avgjørelser som folk flest er uenige i, kan det være like greit å avskaffe domstolen fullstendig?                                                          |         |         |
| Instruksjoner til intervjueren                                                                                                       | [Spurt hvis u=2, ran20=3 og R7OCRECSM_mobil=1. Versjon for mobilbrukere på grunn av oppsett. PC- og nettbrettbrukere blir spurt R7OCRECSM2C3.]<br><br>[Slider blir brukt for å avgi svar. Utgangsposisjonen er er satt til verdien 1.] |         |         |
| Kommentarer                                                                                                                          | Og i hvilken grad mener du at dersom Norges Høyesterett begynner å ta mange avgjørelser som folk flest er uenige i, ka                                                                                                                 |         |         |

# r7ocrecsm2c3\_mobile: I hvilken grad kan domstolen avskaffes, dersom Høyesterett tar mange valg folk er uenige i?

| Verdi | Merkelapp            | Enheter | Prosent |
|-------|----------------------|---------|---------|
| 0     | Ikke i det hele tatt | 7       | 0.1%    |
| 1     | 1                    | 51      | 1.1%    |
| 2     | 2                    | 1       | 0.0%    |
| 3     | 3                    | 1       | 0.0%    |
| 4     | 4                    | 1       | 0.0%    |
| 5     | 5                    | 0       |         |
| 6     | 6                    | 0       |         |
| 7     | 7                    | 1       | 0.0%    |
| 8     | 8                    | 5       | 0.1%    |
| 9     | 9                    | 0       |         |
| 10    | 10                   | 0       |         |
| 11    | 11                   | 2       | 0.0%    |
| 12    | 12                   | 3       | 0.1%    |
| 13    | 13                   | 1       | 0.0%    |
| 14    | 14                   | 0       |         |
| 15    | 15                   | 2       | 0.0%    |
| 16    | 16                   | 0       |         |
| 17    | 17                   | 2       | 0.0%    |
| 18    | 18                   | 3       | 0.1%    |
| 19    | 19                   | 1       | 0.0%    |
| 20    | 20                   | 1       | 0.0%    |
| 21    | 21                   | 0       |         |
| 22    | 22                   | 2       | 0.0%    |
| 23    | 23                   | 0       |         |
| 24    | 24                   | 0       |         |
| 25    | 25                   | 2       | 0.0%    |
| 26    | 26                   | 2       | 0.0%    |
| 27    | 27                   | 1       | 0.0%    |
| 28    | 28                   | 1       | 0.0%    |
| 29    | 29                   | 1       | 0.0%    |
| 30    | 30                   | 1       | 0.0%    |
| 31    | 31                   | 5       | 0.1%    |
| 32    | 32                   | 3       | 0.1%    |
| 33    | 33                   | 1       | 0.0%    |
| 34    | 34                   | 1       | 0.0%    |
| 35    | 35                   | 0       |         |
| 36    | 36                   | 0       |         |
| 37    | 37                   | 0       |         |
| 38    | 38                   | 0       |         |
| 39    | 39                   | 0       |         |
| 40    | 40                   | 0       |         |
| 41    | 41                   | 0       |         |
| 42    | 42                   | 1       | 0.0%    |
| 43    | 43                   | 2       | 0.0%    |
| 44    | 44                   | 0       |         |

| # r7ocrecsm2c3_mobile: I hvilken grad kan domstolen avskaffes, dersom Høyesterett tar mange valg folk er uenige i?                   |                                                                                                              |         |         |
|--------------------------------------------------------------------------------------------------------------------------------------|--------------------------------------------------------------------------------------------------------------|---------|---------|
| Verdi                                                                                                                                | Merkelapp                                                                                                    | Enheter | Prosent |
| 45                                                                                                                                   | 45                                                                                                           | 0       |         |
| 46                                                                                                                                   | 46                                                                                                           | 1       | 0.0%    |
| 47                                                                                                                                   | 47                                                                                                           | 1       | 0.0%    |
| 48                                                                                                                                   | 48                                                                                                           | 0       |         |
| 49                                                                                                                                   | 49                                                                                                           | 2       | 0.0%    |
| 50                                                                                                                                   | Fullstendig                                                                                                  | 3       | 0.1%    |
| 97                                                                                                                                   | Ikke svart                                                                                                   | 0       |         |
| 98                                                                                                                                   | Ikke spurt                                                                                                   | 4577    | 97.6%   |
| Advarsel: disse tallene indikerer antall enheter (cases) i datafilen. De kan ikke tolkes som oppsummert statistikk for populasjonen. |                                                                                                              |         |         |
| # r7mi1: Personlige tanker når du hører/leser ordet «muslim»? [anonymisert]                                                          |                                                                                                              |         |         |
| Informasjon                                                                                                                          | [Type= diskret] [Format=character] [Missing=*]                                                               |         |         |
| Statistikk [NW/ W]                                                                                                                   | [Gyldige=4689 /-] [Ugyldig=0 /-]                                                                             |         |         |
| Spørsmålstekst                                                                                                                       | Hva tenker du personlig på når du hører ordet «muslim»?                                                      |         |         |
| Tekst etter spørsmål                                                                                                                 | Vennligst skriv ned det første du kommer på med dine egne ord. Vi er interessert i både lange og korte svar. |         |         |
| Instruksjoner til intervjueren                                                                                                       | [Spurt hvis u=4.]<br>[Data tilbakeholdt av hensyn til anonymitet]                                            |         |         |
| Verdi                                                                                                                                | Merkelapp                                                                                                    | Enheter | Prosent |
|                                                                                                                                      |                                                                                                              | 4689    | 100.0%  |
| Advarsel: disse tallene indikerer antall enheter (cases) i datafilen. De kan ikke tolkes som oppsummert statistikk for populasjonen. |                                                                                                              |         |         |
| # r7ran1: [Randomiserer hvis u!=2. ]                                                                                                 |                                                                                                              |         |         |
| Informasjon                                                                                                                          | [Type= diskret] [Format=numeric] [Rekkevidde= 1-3] [Missing=*]                                               |         |         |
| Statistikk [NW/ W]                                                                                                                   | [Gyldige=3490 /-] [Ugyldig=1199 /-]                                                                          |         |         |
| Instruksjoner til intervjueren                                                                                                       | [Randomiserer hvis u!=2. ]                                                                                   |         |         |
| Verdi                                                                                                                                | Merkelapp                                                                                                    | Enheter | Prosent |
| 1                                                                                                                                    | 1                                                                                                            | 1183    | 33.9%   |
| 2                                                                                                                                    | 2                                                                                                            | 1163    | 33.3%   |
| 3                                                                                                                                    | 3                                                                                                            | 1144    | 32.8%   |
| Sysmiss                                                                                                                              |                                                                                                              | 1199    |         |
| Advarsel: disse tallene indikerer antall enheter (cases) i datafilen. De kan ikke tolkes som oppsummert statistikk for populasjonen. |                                                                                                              |         |         |
| # r7km1a: Tanker når du hører/leser ordene «olje og gass»? [anonymisert]                                                             |                                                                                                              |         |         |
| Informasjon                                                                                                                          | [Type= diskret] [Format=character] [Missing=*]                                                               |         |         |
| Statistikk [NW/ W]                                                                                                                   | [Gyldige=4689 /-] [Ugyldig=0 /-]                                                                             |         |         |
| Spørsmålstekst                                                                                                                       | Hva tenker du når du hører eller leser ordene «olje og gass»?                                                |         |         |
| Tekst etter spørsmål                                                                                                                 | Vennligst skriv ned det første du kommer på. Vi ønsker alle typer svar.                                      |         |         |
| Instruksjoner til intervjueren                                                                                                       | [Spurt hvis u!=2 og ran1=1. ]<br>[Data tilbakeholdt av hensyn til anonymitet]                                |         |         |
| Verdi                                                                                                                                | Merkelapp                                                                                                    | Enheter | Prosent |
|                                                                                                                                      |                                                                                                              | 4689    | 100.0%  |
| Advarsel: disse tallene indikerer antall enheter (cases) i datafilen. De kan ikke tolkes som oppsummert statistikk for populasjonen. |                                                                                                              |         |         |



| # r7km1b: Tanker når du hører/leser ordet «energi»? [anonymisert]                                                                    |                                                                                                                       |         |             |        |
|--------------------------------------------------------------------------------------------------------------------------------------|-----------------------------------------------------------------------------------------------------------------------|---------|-------------|--------|
| Informasjon                                                                                                                          | [Type= diskret] [Format=character] [Missing=*]                                                                        |         |             |        |
| Statistikk [NW/ W]                                                                                                                   | [Gyldige=4689 /-] [Ugyldig=0 /-]                                                                                      |         |             |        |
| Spørsmålstekst                                                                                                                       | Hva tenker du når du hører eller leser ordet «energi»?                                                                |         |             |        |
| Tekst etter spørsmål                                                                                                                 | Vennligst skriv ned det første du kommer på. Vi ønsker alle typer svar.                                               |         |             |        |
| Instruksjoner til intervjueren                                                                                                       | [Spurt hvis u!=2 og ran1=2. ]                                                                                         |         |             |        |
|                                                                                                                                      | [Data tilbakeholdt av hensyn til anonymitet]                                                                          |         |             |        |
| Verdi                                                                                                                                | Merkelapp                                                                                                             | Enheter | Prosent     |        |
|                                                                                                                                      |                                                                                                                       | 4689    | <div></div> | 100.0% |
| Advarsel: disse tallene indikerer antall enheter (cases) i datafilen. De kan ikke tolkes som oppsummert statistikk for populasjonen. |                                                                                                                       |         |             |        |
| # r7km1c: Tanker når du hører/leser ordet «omstilling»? [anonymisert]                                                                |                                                                                                                       |         |             |        |
| Informasjon                                                                                                                          | [Type= diskret] [Format=character] [Missing=*]                                                                        |         |             |        |
| Statistikk [NW/ W]                                                                                                                   | [Gyldige=4689 /-] [Ugyldig=0 /-]                                                                                      |         |             |        |
| Spørsmålstekst                                                                                                                       | Hva tenker du når du hører eller leser ordet «omstilling»?                                                            |         |             |        |
| Tekst etter spørsmål                                                                                                                 | Vennligst skriv ned det første du kommer på. Vi ønsker alle typer svar.                                               |         |             |        |
| Instruksjoner til intervjueren                                                                                                       | [Spurt hvis u!=2 og ran1=3. ]                                                                                         |         |             |        |
|                                                                                                                                      | [Data tilbakeholdt av hensyn til anonymitet]                                                                          |         |             |        |
| Verdi                                                                                                                                | Merkelapp                                                                                                             | Enheter | Prosent     |        |
|                                                                                                                                      |                                                                                                                       | 4689    | <div></div> | 100.0% |
| Advarsel: disse tallene indikerer antall enheter (cases) i datafilen. De kan ikke tolkes som oppsummert statistikk for populasjonen. |                                                                                                                       |         |             |        |
| # r7dv30_1: Påstand: Skattetrykket bør senkes                                                                                        |                                                                                                                       |         |             |        |
| Informasjon                                                                                                                          | [Type= diskret] [Format=numeric] [Rekkevidde= 1-7] [Missing=*]                                                        |         |             |        |
| Statistikk [NW/ W]                                                                                                                   | [Gyldige=4689 /-] [Ugyldig=0 /-]                                                                                      |         |             |        |
| Tekst før spørsmål                                                                                                                   | Hvor enig eller uenig er du i følgende påstander:                                                                     |         |             |        |
| Spørsmålstekst                                                                                                                       | Skattetrykket bør senkes, selv om det fører til nedskjæringer i velferdsstaten.                                       |         |             |        |
| Instruksjoner til intervjueren                                                                                                       | [Alle respondenter spurt. ]                                                                                           |         |             |        |
| Kommentarer                                                                                                                          | Skattetrykket bør senkes, selv om det fører til nedskjæringer i velferdsstaten. (Hvor enig eller uenig er du i følgen |         |             |        |
| Verdi                                                                                                                                | Merkelapp                                                                                                             | Enheter | Prosent     |        |
| 1                                                                                                                                    | Svært enig                                                                                                            | 112     | <div></div> | 2.4%   |
| 2                                                                                                                                    | Enig                                                                                                                  | 296     | <div></div> | 6.3%   |
| 3                                                                                                                                    | Noe enig                                                                                                              | 606     | <div></div> | 12.9%  |
| 4                                                                                                                                    | Verken enig eller uenig                                                                                               | 497     | <div></div> | 10.6%  |
| 5                                                                                                                                    | Noe uenig                                                                                                             | 877     | <div></div> | 18.7%  |
| 6                                                                                                                                    | Uenig                                                                                                                 | 1266    | <div></div> | 27.0%  |
| 7                                                                                                                                    | Svært uenig                                                                                                           | 1007    | <div></div> | 21.5%  |
| 97                                                                                                                                   | Ikke svart                                                                                                            | 28      | <div></div> | 0.6%   |
| Advarsel: disse tallene indikerer antall enheter (cases) i datafilen. De kan ikke tolkes som oppsummert statistikk for populasjonen. |                                                                                                                       |         |             |        |
| # r7dv30_2: Påstand: Kommersielle privatskoler bør være tillatt.                                                                     |                                                                                                                       |         |             |        |
| Informasjon                                                                                                                          | [Type= diskret] [Format=numeric] [Rekkevidde= 1-7] [Missing=*]                                                        |         |             |        |
| Statistikk [NW/ W]                                                                                                                   | [Gyldige=4689 /-] [Ugyldig=0 /-]                                                                                      |         |             |        |
| Tekst før spørsmål                                                                                                                   | Hvor enig eller uenig er du i følgende påstander:                                                                     |         |             |        |
| Spørsmålstekst                                                                                                                       | Kommersielle privatskoler bør være tillatt.                                                                           |         |             |        |

| # r7dv30_2: Påstand: Kommersielle privatskoler bør være tillatt.                                                                     |                                                                                                                          |         |                              |
|--------------------------------------------------------------------------------------------------------------------------------------|--------------------------------------------------------------------------------------------------------------------------|---------|------------------------------|
| Instruksjoner til intervjueren                                                                                                       | [Alle respondenter spurt. ]                                                                                              |         |                              |
| Kommentarer                                                                                                                          | Kommersielle privatskoler bør være tillatt. (Hvor enig eller uenig er du i følgende påstander:)                          |         |                              |
| Verdi                                                                                                                                | Merkelapp                                                                                                                | Enheter | Prosent                      |
| 1                                                                                                                                    | Svært enig                                                                                                               | 299     | <div><div></div></div> 6.4%  |
| 2                                                                                                                                    | Enig                                                                                                                     | 849     | <div><div></div></div> 18.1% |
| 3                                                                                                                                    | Noe enig                                                                                                                 | 962     | <div><div></div></div> 20.5% |
| 4                                                                                                                                    | Verken enig eller uenig                                                                                                  | 591     | <div><div></div></div> 12.6% |
| 5                                                                                                                                    | Noe uenig                                                                                                                | 696     | <div><div></div></div> 14.8% |
| 6                                                                                                                                    | Uenig                                                                                                                    | 656     | <div><div></div></div> 14.0% |
| 7                                                                                                                                    | Svært uenig                                                                                                              | 595     | <div><div></div></div> 12.7% |
| 97                                                                                                                                   | Ikke svart                                                                                                               | 41      | <div><div></div></div> 0.9%  |
| Advarsel: disse tallene indikerer antall enheter (cases) i datafilen. De kan ikke tolkes som oppsummert statistikk for populasjonen. |                                                                                                                          |         |                              |
| # r7dv30_3: Påstand: Heterofile og homofile par bør ha like rettigheter                                                              |                                                                                                                          |         |                              |
| Informasjon                                                                                                                          | [Type= diskret] [Format=numeric] [Rekkevidde= 1-7] [Missing=*]                                                           |         |                              |
| Statistikk [NW/ W]                                                                                                                   | [Gyldige=4689 /-] [Ugyldig=0 /-]                                                                                         |         |                              |
| Tekst før spørsmål                                                                                                                   | Hvor enig eller uenig er du i følgende påstander:                                                                        |         |                              |
| Spørsmålstekst                                                                                                                       | Heterofile og homofile par bør ha like rettigheter.                                                                      |         |                              |
| Instruksjoner til intervjueren                                                                                                       | [Alle respondenter spurt. ]                                                                                              |         |                              |
| Kommentarer                                                                                                                          | Heterofile og homofile par bør ha like rettigheter. (Hvor enig eller uenig er du i følgende påstander:)                  |         |                              |
| Verdi                                                                                                                                | Merkelapp                                                                                                                | Enheter | Prosent                      |
| 1                                                                                                                                    | Svært enig                                                                                                               | 2118    | <div><div></div></div> 45.2% |
| 2                                                                                                                                    | Enig                                                                                                                     | 1284    | <div><div></div></div> 27.4% |
| 3                                                                                                                                    | Noe enig                                                                                                                 | 421     | <div><div></div></div> 9.0%  |
| 4                                                                                                                                    | Verken enig eller uenig                                                                                                  | 299     | <div><div></div></div> 6.4%  |
| 5                                                                                                                                    | Noe uenig                                                                                                                | 213     | <div><div></div></div> 4.5%  |
| 6                                                                                                                                    | Uenig                                                                                                                    | 176     | <div><div></div></div> 3.8%  |
| 7                                                                                                                                    | Svært uenig                                                                                                              | 148     | <div><div></div></div> 3.2%  |
| 97                                                                                                                                   | Ikke svart                                                                                                               | 30      | <div><div></div></div> 0.6%  |
| Advarsel: disse tallene indikerer antall enheter (cases) i datafilen. De kan ikke tolkes som oppsummert statistikk for populasjonen. |                                                                                                                          |         |                              |
| # r7dv30_4: Påstand: Bedre for et land hvis det er mangfold av ulike religioner/livssyn                                              |                                                                                                                          |         |                              |
| Informasjon                                                                                                                          | [Type= diskret] [Format=numeric] [Rekkevidde= 1-7] [Missing=*]                                                           |         |                              |
| Statistikk [NW/ W]                                                                                                                   | [Gyldige=4689 /-] [Ugyldig=0 /-]                                                                                         |         |                              |
| Tekst før spørsmål                                                                                                                   | Hvor enig eller uenig er du i følgende påstander:                                                                        |         |                              |
| Spørsmålstekst                                                                                                                       | Det er bedre for et land hvis det finnes et mangfold av ulike religioner og livssyn.                                     |         |                              |
| Instruksjoner til intervjueren                                                                                                       | [Alle respondenter spurt. ]                                                                                              |         |                              |
| Kommentarer                                                                                                                          | Det er bedre for et land hvis det finnes et mangfold av ulike religioner og livssyn. (Hvor enig eller uenig er du i følg |         |                              |
| Verdi                                                                                                                                | Merkelapp                                                                                                                | Enheter | Prosent                      |
| 1                                                                                                                                    | Svært enig                                                                                                               | 581     | <div><div></div></div> 12.4% |
| 2                                                                                                                                    | Enig                                                                                                                     | 1082    | <div><div></div></div> 23.1% |
| 3                                                                                                                                    | Noe enig                                                                                                                 | 1001    | <div><div></div></div> 21.3% |
| 4                                                                                                                                    | Verken enig eller uenig                                                                                                  | 666     | <div><div></div></div> 14.2% |

| # r7dv30_4: Påstand: Bedre for et land hvis det er mangfold av ulike religioner/livvsyn                                              |                                                                                                                       |         |                   |
|--------------------------------------------------------------------------------------------------------------------------------------|-----------------------------------------------------------------------------------------------------------------------|---------|-------------------|
| Verdi                                                                                                                                | Merkelapp                                                                                                             | Enheter | Prosent           |
| 5                                                                                                                                    | Noe uenig                                                                                                             | 569     | <div></div> 12.1% |
| 6                                                                                                                                    | Uenig                                                                                                                 | 444     | <div></div> 9.5%  |
| 7                                                                                                                                    | Svært uenig                                                                                                           | 317     | <div></div> 6.8%  |
| 97                                                                                                                                   | Ikke svart                                                                                                            | 29      | <div></div> 0.6%  |
| Advarsel: disse tallene indikerer antall enheter (cases) i datafilen. De kan ikke tolkes som oppsummert statistikk for populasjonen. |                                                                                                                       |         |                   |
| # r7ran40: [Alle respondenter randomisert. ]                                                                                         |                                                                                                                       |         |                   |
| Informasjon                                                                                                                          | [Type= diskret] [Format=numeric] [Rekkevidde= 1-4] [Missing=*]                                                        |         |                   |
| Statistikk [NW/ W]                                                                                                                   | [Gyldige=1199 /-] [Ugyldig=3490 /-]                                                                                   |         |                   |
| Instruksjoner til intervjueren                                                                                                       | [Alle respondenter randomisert. ]                                                                                     |         |                   |
| Verdi                                                                                                                                | Merkelapp                                                                                                             | Enheter | Prosent           |
| 1                                                                                                                                    | 1                                                                                                                     | 287     | <div></div> 23.9% |
| 2                                                                                                                                    | 2                                                                                                                     | 333     | <div></div> 27.8% |
| 3                                                                                                                                    | 3                                                                                                                     | 287     | <div></div> 23.9% |
| 4                                                                                                                                    | 4                                                                                                                     | 292     | <div></div> 24.4% |
| Sysmiss                                                                                                                              |                                                                                                                       | 3490    |                   |
| Advarsel: disse tallene indikerer antall enheter (cases) i datafilen. De kan ikke tolkes som oppsummert statistikk for populasjonen. |                                                                                                                       |         |                   |
| # r7dvh_1: Påstand: Bør ikke tillate olje- og gassutvinning ved Lofoten og Vesterålen                                                |                                                                                                                       |         |                   |
| Informasjon                                                                                                                          | [Type= diskret] [Format=numeric] [Rekkevidde= 1-7] [Missing=*]                                                        |         |                   |
| Statistikk [NW/ W]                                                                                                                   | [Gyldige=4689 /-] [Ugyldig=0 /-]                                                                                      |         |                   |
| Tekst før spørsmål                                                                                                                   | Hvor enig eller uenig er du i følgende påstander:                                                                     |         |                   |
| Spørsmålstekst                                                                                                                       | Vi bør ikke tillate olje- og gassutvinning i området ved Lofoten og Vesterålen.                                       |         |                   |
| Instruksjoner til intervjueren                                                                                                       | [Spurt hvis ran40!=4. Respondenten blir spurt R7DVH_1 eller R7PILOTKM2. ]                                             |         |                   |
| Kommentarer                                                                                                                          | Vi bør ikke tillate olje- og gassutvinning i området ved Lofoten og Vesterålen. (Hvor enig eller uenig er du i følgen |         |                   |
| Verdi                                                                                                                                | Merkelapp                                                                                                             | Enheter | Prosent           |
| 1                                                                                                                                    | Svært enig                                                                                                            | 1056    | <div></div> 22.5% |
| 2                                                                                                                                    | Enig                                                                                                                  | 745     | <div></div> 15.9% |
| 3                                                                                                                                    | Noe enig                                                                                                              | 466     | <div></div> 9.9%  |
| 4                                                                                                                                    | Verken enig eller uenig                                                                                               | 765     | <div></div> 16.3% |
| 5                                                                                                                                    | Noe uenig                                                                                                             | 499     | <div></div> 10.6% |
| 6                                                                                                                                    | Uenig                                                                                                                 | 517     | <div></div> 11.0% |
| 7                                                                                                                                    | Svært uenig                                                                                                           | 311     | <div></div> 6.6%  |
| 97                                                                                                                                   | Ikke svart                                                                                                            | 20      | <div></div> 0.4%  |
| 98                                                                                                                                   | Ikke spurt                                                                                                            | 310     | <div></div> 6.6%  |
| Advarsel: disse tallene indikerer antall enheter (cases) i datafilen. De kan ikke tolkes som oppsummert statistikk for populasjonen. |                                                                                                                       |         |                   |
| # r7dvh_2: Påstand: Flyktninger bør ha samme rett til sosialhjelp som nordmenn                                                       |                                                                                                                       |         |                   |
| Informasjon                                                                                                                          | [Type= diskret] [Format=numeric] [Rekkevidde= 1-7] [Missing=*]                                                        |         |                   |
| Statistikk [NW/ W]                                                                                                                   | [Gyldige=4689 /-] [Ugyldig=0 /-]                                                                                      |         |                   |
| Tekst før spørsmål                                                                                                                   | Hvor enig eller uenig er du i følgende påstander:                                                                     |         |                   |
| Spørsmålstekst                                                                                                                       | Flyktninger bør ha samme rett til sosialhjelp som nordmenn, selv om de ikke er norske statsborgere.                   |         |                   |
| Instruksjoner til intervjueren                                                                                                       | [Alle respondenter spurt. ]                                                                                           |         |                   |

| # r7dvh_2: Påstand: Flyktninger bør ha samme rett til sosialhjelp som nordmenn                                                       |                         |                                                                                                                          |                              |
|--------------------------------------------------------------------------------------------------------------------------------------|-------------------------|--------------------------------------------------------------------------------------------------------------------------|------------------------------|
| Kommentarer                                                                                                                          |                         | Flyktninger bør ha samme rett til sosialhjelp som nordmenn, selv om de ikke er norske statsborgere. (Hvor enig eller uen |                              |
| Verdi                                                                                                                                | Merkelapp               | Enheter                                                                                                                  | Prosent                      |
| 1                                                                                                                                    | Svært enig              | 300                                                                                                                      | <div><div></div></div> 6.4%  |
| 2                                                                                                                                    | Enig                    | 765                                                                                                                      | <div><div></div></div> 16.3% |
| 3                                                                                                                                    | Noe enig                | 822                                                                                                                      | <div><div></div></div> 17.5% |
| 4                                                                                                                                    | Verken enig eller uenig | 472                                                                                                                      | <div><div></div></div> 10.1% |
| 5                                                                                                                                    | Noe uenig               | 950                                                                                                                      | <div><div></div></div> 20.3% |
| 6                                                                                                                                    | Uenig                   | 810                                                                                                                      | <div><div></div></div> 17.3% |
| 7                                                                                                                                    | Svært uenig             | 539                                                                                                                      | <div><div></div></div> 11.5% |
| 97                                                                                                                                   | Ikke svart              | 31                                                                                                                       | <div><div></div></div> 0.7%  |
| Advarsel: disse tallene indikerer antall enheter (cases) i datafilen. De kan ikke tolkes som oppsummert statistikk for populasjonen. |                         |                                                                                                                          |                              |
| # r7dvh_3: Påstand: Mange offentlige aktiviteter kunne blitt utført bedre og billigere av private aktører                            |                         |                                                                                                                          |                              |
| Informasjon                                                                                                                          |                         | [Type= diskret] [Format=numeric] [Rekkevidde= 1-7] [Missing=*]                                                           |                              |
| Statistikk [NW/ W]                                                                                                                   |                         | [Gyldige=4689 /-] [Ugyldig=0 /-]                                                                                         |                              |
| Tekst før spørsmål                                                                                                                   |                         | Hvor enig eller uenig er du i følgende påstander:                                                                        |                              |
| Spørsmålstekst                                                                                                                       |                         | Mange offentlige aktiviteter kunne blitt utført både bedre og billigere, dersom de ble overlatt til private aktører.     |                              |
| Instruksjoner til intervjueren                                                                                                       |                         | [Alle respondenter spurt. ]                                                                                              |                              |
| Kommentarer                                                                                                                          |                         | Mange offentlige aktiviteter kunne blitt utført både bedre og billigere, dersom de ble overlatt til private aktører. (   |                              |
| Verdi                                                                                                                                | Merkelapp               | Enheter                                                                                                                  | Prosent                      |
| 1                                                                                                                                    | Svært enig              | 282                                                                                                                      | <div><div></div></div> 6.0%  |
| 2                                                                                                                                    | Enig                    | 715                                                                                                                      | <div><div></div></div> 15.2% |
| 3                                                                                                                                    | Noe enig                | 1148                                                                                                                     | <div><div></div></div> 24.5% |
| 4                                                                                                                                    | Verken enig eller uenig | 608                                                                                                                      | <div><div></div></div> 13.0% |
| 5                                                                                                                                    | Noe uenig               | 683                                                                                                                      | <div><div></div></div> 14.6% |
| 6                                                                                                                                    | Uenig                   | 779                                                                                                                      | <div><div></div></div> 16.6% |
| 7                                                                                                                                    | Svært uenig             | 437                                                                                                                      | <div><div></div></div> 9.3%  |
| 97                                                                                                                                   | Ikke svart              | 37                                                                                                                       | <div><div></div></div> 0.8%  |
| Advarsel: disse tallene indikerer antall enheter (cases) i datafilen. De kan ikke tolkes som oppsummert statistikk for populasjonen. |                         |                                                                                                                          |                              |
| # r7dvh_4: Påstand: Staten bør bidra til å redusere inntektsforskjeller                                                              |                         |                                                                                                                          |                              |
| Informasjon                                                                                                                          |                         | [Type= diskret] [Format=numeric] [Rekkevidde= 1-7] [Missing=*]                                                           |                              |
| Statistikk [NW/ W]                                                                                                                   |                         | [Gyldige=4689 /-] [Ugyldig=0 /-]                                                                                         |                              |
| Tekst før spørsmål                                                                                                                   |                         | Hvor enig eller uenig er du i følgende påstander:                                                                        |                              |
| Spørsmålstekst                                                                                                                       |                         | Staten bør bidra til å redusere inntektsforskjeller i samfunnet.                                                         |                              |
| Instruksjoner til intervjueren                                                                                                       |                         | [Alle respondenter spurt. ]                                                                                              |                              |
| Kommentarer                                                                                                                          |                         | Staten bør bidra til å redusere inntektsforskjeller i samfunnet. (Hvor enig eller uenig er du i følgende påstander:)     |                              |
| Verdi                                                                                                                                | Merkelapp               | Enheter                                                                                                                  | Prosent                      |
| 1                                                                                                                                    | Svært enig              | 855                                                                                                                      | <div><div></div></div> 18.2% |
| 2                                                                                                                                    | Enig                    | 1380                                                                                                                     | <div><div></div></div> 29.4% |
| 3                                                                                                                                    | Noe enig                | 1168                                                                                                                     | <div><div></div></div> 24.9% |
| 4                                                                                                                                    | Verken enig eller uenig | 493                                                                                                                      | <div><div></div></div> 10.5% |
| 5                                                                                                                                    | Noe uenig               | 429                                                                                                                      | <div><div></div></div> 9.1%  |
| 6                                                                                                                                    | Uenig                   | 249                                                                                                                      | <div><div></div></div> 5.3%  |

| # r7dvh_4: Påstand: Staten bør bidra til å redusere inntektsforskjeller                                                              |                                                                                                                                                                                                                                                                                                                                                                                              |         |                              |
|--------------------------------------------------------------------------------------------------------------------------------------|----------------------------------------------------------------------------------------------------------------------------------------------------------------------------------------------------------------------------------------------------------------------------------------------------------------------------------------------------------------------------------------------|---------|------------------------------|
| Verdi                                                                                                                                | Merkelapp                                                                                                                                                                                                                                                                                                                                                                                    | Enheter | Prosent                      |
| 7                                                                                                                                    | Svært uenig                                                                                                                                                                                                                                                                                                                                                                                  | 80      | <div><div></div></div> 1.7%  |
| 97                                                                                                                                   | Ikke svart                                                                                                                                                                                                                                                                                                                                                                                   | 35      | <div><div></div></div> 0.7%  |
| Advarsel: disse tallene indikerer antall enheter (cases) i datafilen. De kan ikke tolkes som oppsummert statistikk for populasjonen. |                                                                                                                                                                                                                                                                                                                                                                                              |         |                              |
| # r7ran2: [Alle respondenter randomisert. ]                                                                                          |                                                                                                                                                                                                                                                                                                                                                                                              |         |                              |
| Informasjon                                                                                                                          | [Type= diskret] [Format=numeric] [Rekkevidde= 1-2] [Missing=*]                                                                                                                                                                                                                                                                                                                               |         |                              |
| Statistikk [NW/ W]                                                                                                                   | [Gyldige=4681 /-] [Ugyldig=8 /-]                                                                                                                                                                                                                                                                                                                                                             |         |                              |
| Instruksjoner til intervjueren                                                                                                       | [Alle respondenter randomisert. ]                                                                                                                                                                                                                                                                                                                                                            |         |                              |
| Verdi                                                                                                                                | Merkelapp                                                                                                                                                                                                                                                                                                                                                                                    | Enheter | Prosent                      |
| 1                                                                                                                                    | 1                                                                                                                                                                                                                                                                                                                                                                                            | 2294    | <div><div></div></div> 49.0% |
| 2                                                                                                                                    | 2                                                                                                                                                                                                                                                                                                                                                                                            | 2387    | <div><div></div></div> 51.0% |
| Sysmiss                                                                                                                              |                                                                                                                                                                                                                                                                                                                                                                                              | 8       |                              |
| Advarsel: disse tallene indikerer antall enheter (cases) i datafilen. De kan ikke tolkes som oppsummert statistikk for populasjonen. |                                                                                                                                                                                                                                                                                                                                                                                              |         |                              |
| # r7km13_1: Bør satses mest på utslippsreduksjon enten i Norge, utland eller begge steder                                            |                                                                                                                                                                                                                                                                                                                                                                                              |         |                              |
| Informasjon                                                                                                                          | [Type= diskret] [Format=numeric] [Rekkevidde= 1-3] [Missing=*]                                                                                                                                                                                                                                                                                                                               |         |                              |
| Statistikk [NW/ W]                                                                                                                   | [Gyldige=4689 /-] [Ugyldig=0 /-]                                                                                                                                                                                                                                                                                                                                                             |         |                              |
| Tekst før spørsmål                                                                                                                   | Klimaforskerne mener at utslipp av drivhusgasser må reduseres kraftig dersom man ønsker å motvirke menneskeskapte klimaendringer.<br>Det foregår en debatt om Norge bør satse på slike reduksjoner i Norge eller i utlandet. Å redusere utslipp i utlandet er ofte billigere enn i Norge, men tiltak i utlandet har også blitt kritisert bl.a. for ikke å ha ønsket effekt.<br>Hva synes du? |         |                              |
| Spørsmålstekst                                                                                                                       | Bør myndighetene satse mest på å redusere utslipp i Norge, eller i utlandet, eller like mye begge steder?                                                                                                                                                                                                                                                                                    |         |                              |
| Instruksjoner til intervjueren                                                                                                       | [Spurt hvis ran2=1. ]                                                                                                                                                                                                                                                                                                                                                                        |         |                              |
| Kommentarer                                                                                                                          | Klimaforskerne mener at utslipp av drivhusgasser må reduseres kraftig dersom man ønsker å motvirke menneskeskapte klim                                                                                                                                                                                                                                                                       |         |                              |
| Verdi                                                                                                                                | Merkelapp                                                                                                                                                                                                                                                                                                                                                                                    | Enheter | Prosent                      |
| 1                                                                                                                                    | Myndighetene bør satse mest på å redusere utslipp i Norge                                                                                                                                                                                                                                                                                                                                    | 521     | <div><div></div></div> 11.1% |
| 2                                                                                                                                    | Myndighetene bør satse mest på å redusere utslipp i utlandet                                                                                                                                                                                                                                                                                                                                 | 308     | <div><div></div></div> 6.6%  |
| 3                                                                                                                                    | Myndighetene bør satse på å redusere utslipp like mye i Norge som i utlandet                                                                                                                                                                                                                                                                                                                 | 1413    | <div><div></div></div> 30.1% |
| 97                                                                                                                                   | Ikke svart                                                                                                                                                                                                                                                                                                                                                                                   | 52      | <div><div></div></div> 1.1%  |
| 98                                                                                                                                   | Ikke spurt                                                                                                                                                                                                                                                                                                                                                                                   | 2395    | <div><div></div></div> 51.1% |
| Advarsel: disse tallene indikerer antall enheter (cases) i datafilen. De kan ikke tolkes som oppsummert statistikk for populasjonen. |                                                                                                                                                                                                                                                                                                                                                                                              |         |                              |
| # r7km13_2: Utsagn: Mesteparten av utslippsreduksjonen Norge forplikter seg til, bør tas i utlandet                                  |                                                                                                                                                                                                                                                                                                                                                                                              |         |                              |
| Informasjon                                                                                                                          | [Type= diskret] [Format=numeric] [Rekkevidde= 1-7] [Missing=*]                                                                                                                                                                                                                                                                                                                               |         |                              |
| Statistikk [NW/ W]                                                                                                                   | [Gyldige=4689 /-] [Ugyldig=0 /-]                                                                                                                                                                                                                                                                                                                                                             |         |                              |
| Tekst før spørsmål                                                                                                                   | Se på utsagnet nedenfor. Hvor enig eller uenig er du i det?                                                                                                                                                                                                                                                                                                                                  |         |                              |
| Spørsmålstekst                                                                                                                       | «Mesteparten av utslippsreduksjonene av klimagasser som Norge har forpliktet seg til, bør tas i utlandet»                                                                                                                                                                                                                                                                                    |         |                              |
| Instruksjoner til intervjueren                                                                                                       | [Spurt hvis ran2=2. ]                                                                                                                                                                                                                                                                                                                                                                        |         |                              |
| Kommentarer                                                                                                                          | Se på utsagnet nedenfor. Hvor enig eller uenig er du i det? «Mesteparten av utslippsreduksjonene av klimagasser som Nor                                                                                                                                                                                                                                                                      |         |                              |
| Verdi                                                                                                                                | Merkelapp                                                                                                                                                                                                                                                                                                                                                                                    | Enheter | Prosent                      |
| 1                                                                                                                                    | Svært enig                                                                                                                                                                                                                                                                                                                                                                                   | 120     | <div><div></div></div> 2.6%  |
| 2                                                                                                                                    | Enig                                                                                                                                                                                                                                                                                                                                                                                         | 167     | <div><div></div></div> 3.6%  |

| # r7km13_2: Utsagn: Mesteparten av utslippsreduksjonen Norge forplikter seg til, bør tas i utlandet                                  |                                                                                                                         |         |                        |       |
|--------------------------------------------------------------------------------------------------------------------------------------|-------------------------------------------------------------------------------------------------------------------------|---------|------------------------|-------|
| Verdi                                                                                                                                | Merkelapp                                                                                                               | Enheter | Prosent                |       |
| 3                                                                                                                                    | Noe enig                                                                                                                | 336     | <div><div></div></div> | 7.2%  |
| 4                                                                                                                                    | Verken enig eller uenig                                                                                                 | 558     | <div><div></div></div> | 11.9% |
| 5                                                                                                                                    | Noe uenig                                                                                                               | 375     | <div><div></div></div> | 8.0%  |
| 6                                                                                                                                    | Uenig                                                                                                                   | 557     | <div><div></div></div> | 11.9% |
| 7                                                                                                                                    | Svært uenig                                                                                                             | 254     | <div><div></div></div> | 5.4%  |
| 97                                                                                                                                   | Ikke svart                                                                                                              | 20      | <div><div></div></div> | 0.4%  |
| 98                                                                                                                                   | Ikke spurt                                                                                                              | 2302    | <div><div></div></div> | 49.1% |
| Advarsel: disse tallene indikerer antall enheter (cases) i datafilen. De kan ikke tolkes som oppsummert statistikk for populasjonen. |                                                                                                                         |         |                        |       |
| # r7elite_1: Påstand: Vi er enige om hva som må gjøres, men lite skjer fordi myndighetene er i veien                                 |                                                                                                                         |         |                        |       |
| Informasjon                                                                                                                          | [Type= diskret] [Format=numeric] [Rekkevidde= 1-7] [Missing=*]                                                          |         |                        |       |
| Statistikk [NW/ W]                                                                                                                   | [Gyldige=4689 /-] [Ugyldig=0 /-]                                                                                        |         |                        |       |
| Tekst før spørsmål                                                                                                                   | Hvor enig eller uenig er du i følgende påstander:                                                                       |         |                        |       |
| Spørsmålstekst                                                                                                                       | Vi er enige om de fleste ting som må gjøres i dette landet, men lite skjer fordi myndighetene står i veien.             |         |                        |       |
| Instruksjoner til intervjueren                                                                                                       | [Alle respondenter spurt. ]                                                                                             |         |                        |       |
| Kommentarer                                                                                                                          | Vi er enige om de fleste ting som må gjøres i dette landet, men lite skjer fordi myndighetene står i veien. (Hvor enig  |         |                        |       |
| Verdi                                                                                                                                | Merkelapp                                                                                                               | Enheter | Prosent                |       |
| 1                                                                                                                                    | Svært enig                                                                                                              | 151     | <div><div></div></div> | 3.2%  |
| 2                                                                                                                                    | Enig                                                                                                                    | 431     | <div><div></div></div> | 9.2%  |
| 3                                                                                                                                    | Noe enig                                                                                                                | 1200    | <div><div></div></div> | 25.6% |
| 4                                                                                                                                    | Verken enig eller uenig                                                                                                 | 1035    | <div><div></div></div> | 22.1% |
| 5                                                                                                                                    | Noe uenig                                                                                                               | 713     | <div><div></div></div> | 15.2% |
| 6                                                                                                                                    | Uenig                                                                                                                   | 938     | <div><div></div></div> | 20.0% |
| 7                                                                                                                                    | Svært uenig                                                                                                             | 150     | <div><div></div></div> | 3.2%  |
| 97                                                                                                                                   | Ikke svart                                                                                                              | 71      | <div><div></div></div> | 1.5%  |
| Advarsel: disse tallene indikerer antall enheter (cases) i datafilen. De kan ikke tolkes som oppsummert statistikk for populasjonen. |                                                                                                                         |         |                        |       |
| # r7elite_2: Påstand: Yrkespolitikere har god kontakt med velgere i hele landet                                                      |                                                                                                                         |         |                        |       |
| Informasjon                                                                                                                          | [Type= diskret] [Format=numeric] [Rekkevidde= 1-7] [Missing=*]                                                          |         |                        |       |
| Statistikk [NW/ W]                                                                                                                   | [Gyldige=4689 /-] [Ugyldig=0 /-]                                                                                        |         |                        |       |
| Tekst før spørsmål                                                                                                                   | Hvor enig eller uenig er du i følgende påstander:                                                                       |         |                        |       |
| Spørsmålstekst                                                                                                                       | De fleste yrkespolitikere i Norge har god kontakt med velgere i hele landet.                                            |         |                        |       |
| Instruksjoner til intervjueren                                                                                                       | [Alle respondenter spurt. ]                                                                                             |         |                        |       |
| Kommentarer                                                                                                                          | De fleste yrkespolitikere i Norge har god kontakt med velgere i hele landet. (Hvor enig eller uenig er du i følgende på |         |                        |       |
| Verdi                                                                                                                                | Merkelapp                                                                                                               | Enheter | Prosent                |       |
| 1                                                                                                                                    | Svært enig                                                                                                              | 12      | <div><div></div></div> | 0.3%  |
| 2                                                                                                                                    | Enig                                                                                                                    | 269     | <div><div></div></div> | 5.7%  |
| 3                                                                                                                                    | Noe enig                                                                                                                | 808     | <div><div></div></div> | 17.2% |
| 4                                                                                                                                    | Verken enig eller uenig                                                                                                 | 1033    | <div><div></div></div> | 22.0% |
| 5                                                                                                                                    | Noe uenig                                                                                                               | 1193    | <div><div></div></div> | 25.4% |
| 6                                                                                                                                    | Uenig                                                                                                                   | 991     | <div><div></div></div> | 21.1% |
| 7                                                                                                                                    | Svært uenig                                                                                                             | 319     | <div><div></div></div> | 6.8%  |
| 97                                                                                                                                   | Ikke svart                                                                                                              | 64      | <div><div></div></div> | 1.4%  |

| # r7elite_2: Påstand: Yrkespolitikere har god kontakt med velgere i hele landet                                                      |                                                                                                                         |         |                              |
|--------------------------------------------------------------------------------------------------------------------------------------|-------------------------------------------------------------------------------------------------------------------------|---------|------------------------------|
| Advarsel: disse tallene indikerer antall enheter (cases) i datafilen. De kan ikke tolkes som oppsummert statistikk for populasjonen. |                                                                                                                         |         |                              |
| # r7elite_3: Påstand: Mange viktige avgjørelser tatt av liten gruppe uten vanlige folks viten                                        |                                                                                                                         |         |                              |
| Informasjon                                                                                                                          | [Type= diskret] [Format=numeric] [Rekkevidde= 1-7] [Missing=*]                                                          |         |                              |
| Statistikk [NW/ W]                                                                                                                   | [Gyldige=4689 /-] [Ugyldig=0 /-]                                                                                        |         |                              |
| Tekst før spørsmål                                                                                                                   | Hvor enig eller uenig er du i følgende påstander:                                                                       |         |                              |
| Spørsmålstekst                                                                                                                       | Mange viktige avgjørelser i dette landet blir tatt av en liten gruppe mennesker uten at vanlige folk får vite om det.   |         |                              |
| Instruksjoner til intervjueren                                                                                                       | [Alle respondenter spurt. ]                                                                                             |         |                              |
| Kommentarer                                                                                                                          | Mange viktige avgjørelser i dette landet blir tatt av en liten gruppe mennesker uten at vanlige folk får vite om det. ( |         |                              |
| Verdi                                                                                                                                | Merkelapp                                                                                                               | Enheter | Prosent                      |
| 1                                                                                                                                    | Svært enig                                                                                                              | 471     | <div><div></div></div> 10.0% |
| 2                                                                                                                                    | Enig                                                                                                                    | 1158    | <div><div></div></div> 24.7% |
| 3                                                                                                                                    | Noe enig                                                                                                                | 1528    | <div><div></div></div> 32.6% |
| 4                                                                                                                                    | Verken enig eller uenig                                                                                                 | 642     | <div><div></div></div> 13.7% |
| 5                                                                                                                                    | Noe uenig                                                                                                               | 459     | <div><div></div></div> 9.8%  |
| 6                                                                                                                                    | Uenig                                                                                                                   | 326     | <div><div></div></div> 7.0%  |
| 7                                                                                                                                    | Svært uenig                                                                                                             | 47      | <div><div></div></div> 1.0%  |
| 97                                                                                                                                   | Ikke svart                                                                                                              | 58      | <div><div></div></div> 1.2%  |
| Advarsel: disse tallene indikerer antall enheter (cases) i datafilen. De kan ikke tolkes som oppsummert statistikk for populasjonen. |                                                                                                                         |         |                              |
| # r7elite_4: Påstand: Like stor forskjell mellom politikere som mellom folk ellers                                                   |                                                                                                                         |         |                              |
| Informasjon                                                                                                                          | [Type= diskret] [Format=numeric] [Rekkevidde= 1-7] [Missing=*]                                                          |         |                              |
| Statistikk [NW/ W]                                                                                                                   | [Gyldige=4689 /-] [Ugyldig=0 /-]                                                                                        |         |                              |
| Tekst før spørsmål                                                                                                                   | Hvor enig eller uenig er du i følgende påstander:                                                                       |         |                              |
| Spørsmålstekst                                                                                                                       | Det er like stor forskjell mellom politikere som det er mellom folk ellers.                                             |         |                              |
| Instruksjoner til intervjueren                                                                                                       | [Alle respondenter spurt. ]                                                                                             |         |                              |
| Kommentarer                                                                                                                          | Det er like stor forskjell mellom politikere som det er mellom folk ellers. (Hvor enig eller uenig er du i følgende pås |         |                              |
| Verdi                                                                                                                                | Merkelapp                                                                                                               | Enheter | Prosent                      |
| 1                                                                                                                                    | Svært enig                                                                                                              | 468     | <div><div></div></div> 10.0% |
| 2                                                                                                                                    | Enig                                                                                                                    | 1778    | <div><div></div></div> 37.9% |
| 3                                                                                                                                    | Noe enig                                                                                                                | 1042    | <div><div></div></div> 22.2% |
| 4                                                                                                                                    | Verken enig eller uenig                                                                                                 | 589     | <div><div></div></div> 12.6% |
| 5                                                                                                                                    | Noe uenig                                                                                                               | 446     | <div><div></div></div> 9.5%  |
| 6                                                                                                                                    | Uenig                                                                                                                   | 247     | <div><div></div></div> 5.3%  |
| 7                                                                                                                                    | Svært uenig                                                                                                             | 57      | <div><div></div></div> 1.2%  |
| 97                                                                                                                                   | Ikke svart                                                                                                              | 62      | <div><div></div></div> 1.3%  |
| Advarsel: disse tallene indikerer antall enheter (cases) i datafilen. De kan ikke tolkes som oppsummert statistikk for populasjonen. |                                                                                                                         |         |                              |
| # r7ran5: [Randomiserer hvis u=2. ]                                                                                                  |                                                                                                                         |         |                              |
| Informasjon                                                                                                                          | [Type= diskret] [Format=numeric] [Rekkevidde= 1-2] [Missing=*]                                                          |         |                              |
| Statistikk [NW/ W]                                                                                                                   | [Gyldige=1195 /-] [Ugyldig=3494 /-]                                                                                     |         |                              |
| Instruksjoner til intervjueren                                                                                                       | [Randomiserer hvis u=2. ]                                                                                               |         |                              |
| Verdi                                                                                                                                | Merkelapp                                                                                                               | Enheter | Prosent                      |
| 1                                                                                                                                    | 1                                                                                                                       | 609     | <div><div></div></div> 51.0% |

| # r7ran5: [Randomiserer hvis u=2. ]                                                                                                  |                                                                                                                                                     |         |                   |
|--------------------------------------------------------------------------------------------------------------------------------------|-----------------------------------------------------------------------------------------------------------------------------------------------------|---------|-------------------|
| Verdi                                                                                                                                | Merkelapp                                                                                                                                           | Enheter | Prosent           |
| 2                                                                                                                                    | 2                                                                                                                                                   | 586     | <div></div> 49.0% |
| Sysmiss                                                                                                                              |                                                                                                                                                     | 3494    |                   |
| Advarsel: disse tallene indikerer antall enheter (cases) i datafilen. De kan ikke tolkes som oppsummert statistikk for populasjonen. |                                                                                                                                                     |         |                   |
| # r7mi4_1: Bryr ledere seg mest om seg selv, eller prøver de å gjøre det de mener er rett?                                           |                                                                                                                                                     |         |                   |
| Informasjon                                                                                                                          | [Type= diskret] [Format=numeric] [Rekkevidde= 1-7] [Missing=*]                                                                                      |         |                   |
| Statistikk [NW/ W]                                                                                                                   | [Gyldige=4689 /-] [Ugyldig=0 /-]                                                                                                                    |         |                   |
| Tekst før spørsmål                                                                                                                   | Noen mener at ledere i sin alminnelighet bryr seg mest om seg selv. Andre mener at de prøver så godt de kan å gjøre det de mener er rett.           |         |                   |
| Spørsmålstekst                                                                                                                       | Hva mener du?                                                                                                                                       |         |                   |
| Instruksjoner til intervjueren                                                                                                       | [Spurt hvis u=2 og ran5=1. ]                                                                                                                        |         |                   |
| Kommentarer                                                                                                                          | Noen mener at ledere i sin alminnelighet bryr seg mest om seg selv. Andre mener at de prøver så godt de kan å gjøre                                 |         |                   |
| Verdi                                                                                                                                | Merkelapp                                                                                                                                           | Enheter | Prosent           |
| 1                                                                                                                                    | Ledere bryr seg i svært sterk grad om seg selv                                                                                                      | 28      | <div></div> 0.6%  |
| 2                                                                                                                                    | Ledere bryr seg i sterk grad om seg selv                                                                                                            | 111     | <div></div> 2.4%  |
| 3                                                                                                                                    | Ledere bryr seg i noen grad om seg selv                                                                                                             | 118     | <div></div> 2.5%  |
| 4                                                                                                                                    | Ingen av delene                                                                                                                                     | 69      | <div></div> 1.5%  |
| 5                                                                                                                                    | Ledere prøver i noen grad å gjøre rett                                                                                                              | 133     | <div></div> 2.8%  |
| 6                                                                                                                                    | Ledere prøver i sterk grad å gjøre rett                                                                                                             | 133     | <div></div> 2.8%  |
| 7                                                                                                                                    | Ledere prøver i svært sterk grad å gjøre rett                                                                                                       | 10      | <div></div> 0.2%  |
| 97                                                                                                                                   | Ikke svart                                                                                                                                          | 7       | <div></div> 0.1%  |
| 98                                                                                                                                   | Ikke spurt                                                                                                                                          | 4080    | <div></div> 87.0% |
| Advarsel: disse tallene indikerer antall enheter (cases) i datafilen. De kan ikke tolkes som oppsummert statistikk for populasjonen. |                                                                                                                                                     |         |                   |
| # r7mi4_2: Bryr muslimske ledere seg mest om seg selv, eller prøver de å gjøre det de mener er rett?                                 |                                                                                                                                                     |         |                   |
| Informasjon                                                                                                                          | [Type= diskret] [Format=numeric] [Rekkevidde= 1-7] [Missing=*]                                                                                      |         |                   |
| Statistikk [NW/ W]                                                                                                                   | [Gyldige=4689 /-] [Ugyldig=0 /-]                                                                                                                    |         |                   |
| Tekst før spørsmål                                                                                                                   | Noen mener at muslimske ledere i sin alminnelighet bryr seg mest om seg selv. Andre mener at de prøver så godt de kan å gjøre det de mener er rett. |         |                   |
| Spørsmålstekst                                                                                                                       | Hva mener du?                                                                                                                                       |         |                   |
| Instruksjoner til intervjueren                                                                                                       | [Spurt hvis u=2 og ran5=2. ]                                                                                                                        |         |                   |
| Kommentarer                                                                                                                          | Noen mener at muslimske ledere i sin alminnelighet bryr seg mest om seg selv. Andre mener at de prøver så godt de kan                               |         |                   |
| Verdi                                                                                                                                | Merkelapp                                                                                                                                           | Enheter | Prosent           |
| 1                                                                                                                                    | Muslimske ledere bryr seg i svært sterk grad om seg selv                                                                                            | 68      | <div></div> 1.5%  |
| 2                                                                                                                                    | Muslimske ledere bryr seg i sterk grad om seg selv                                                                                                  | 109     | <div></div> 2.3%  |
| 3                                                                                                                                    | Muslimske ledere bryr seg i noen grad om seg selv                                                                                                   | 56      | <div></div> 1.2%  |
| 4                                                                                                                                    | Ingen av delene                                                                                                                                     | 158     | <div></div> 3.4%  |
| 5                                                                                                                                    | Muslimske ledere prøver i noen grad å gjøre rett                                                                                                    | 110     | <div></div> 2.3%  |
| 6                                                                                                                                    | Muslimske ledere prøver i sterk grad å gjøre rett                                                                                                   | 46      | <div></div> 1.0%  |
| 7                                                                                                                                    | Muslimske ledere prøver i svært sterk grad å gjøre rett                                                                                             | 4       | <div></div> 0.1%  |
| 97                                                                                                                                   | Ikke svart                                                                                                                                          | 35      | <div></div> 0.7%  |
| 98                                                                                                                                   | Ikke spurt                                                                                                                                          | 4103    | <div></div> 87.5% |
| Advarsel: disse tallene indikerer antall enheter (cases) i datafilen. De kan ikke tolkes som oppsummert statistikk for populasjonen. |                                                                                                                                                     |         |                   |



| # r7pad10_1: Påstand: Innvandrerbarn med foreldre som har ulovlig opphold, bør få bli dersom foreldre sendt ut                       |                                                                                                                                                                                         |         |                              |
|--------------------------------------------------------------------------------------------------------------------------------------|-----------------------------------------------------------------------------------------------------------------------------------------------------------------------------------------|---------|------------------------------|
| Informasjon                                                                                                                          | [Type= diskret] [Format=numeric] [Rekkevidde= 1-7] [Missing=*]                                                                                                                          |         |                              |
| Statistikk [NW/ W]                                                                                                                   | [Gyldige=4689 /-] [Ugyldig=0 /-]                                                                                                                                                        |         |                              |
| Tekst før spørsmål                                                                                                                   | Generelt sett, i hvilken grad er du enig eller uenig i følgende påstander:                                                                                                              |         |                              |
| Spørsmålstekst                                                                                                                       | Innvandrerbarn som har foreldre som oppholder seg ulovlig i Norge bør ha krav på å få bli i landet dersom foreldrene blir sendt ut.                                                     |         |                              |
| Instruksjoner til intervjueren                                                                                                       | [Spurt hvis u=3. ]                                                                                                                                                                      |         |                              |
| Kommentarer                                                                                                                          | Innvandrerbarn som har foreldre som oppholder seg ulovlig i Norge bør ha krav på å få bli i landet dersom foreldrene                                                                    |         |                              |
| Verdi                                                                                                                                | Merkelapp                                                                                                                                                                               | Enheter | Prosent                      |
| 1                                                                                                                                    | Svært enig                                                                                                                                                                              | 48      | <div><div></div></div> 1.0%  |
| 2                                                                                                                                    | Enig                                                                                                                                                                                    | 150     | <div><div></div></div> 3.2%  |
| 3                                                                                                                                    | Noe enig                                                                                                                                                                                | 222     | <div><div></div></div> 4.7%  |
| 4                                                                                                                                    | Verken enig eller uenig                                                                                                                                                                 | 186     | <div><div></div></div> 4.0%  |
| 5                                                                                                                                    | Noe uenig                                                                                                                                                                               | 169     | <div><div></div></div> 3.6%  |
| 6                                                                                                                                    | Uenig                                                                                                                                                                                   | 214     | <div><div></div></div> 4.6%  |
| 7                                                                                                                                    | Svært uenig                                                                                                                                                                             | 94      | <div><div></div></div> 2.0%  |
| 97                                                                                                                                   | Ikke svart                                                                                                                                                                              | 20      | <div><div></div></div> 0.4%  |
| 98                                                                                                                                   | Ikke spurt                                                                                                                                                                              | 3586    | <div><div></div></div> 76.5% |
| Advarsel: disse tallene indikerer antall enheter (cases) i datafilen. De kan ikke tolkes som oppsummert statistikk for populasjonen. |                                                                                                                                                                                         |         |                              |
| # r7pad10_2: Påstand: Hvis arbeidsgiver gir deg en arbeidstelefon, bør arbeidsgiver ha lov til å lese meldinger på telefonen         |                                                                                                                                                                                         |         |                              |
| Informasjon                                                                                                                          | [Type= diskret] [Format=numeric] [Rekkevidde= 1-7] [Missing=*]                                                                                                                          |         |                              |
| Statistikk [NW/ W]                                                                                                                   | [Gyldige=4689 /-] [Ugyldig=0 /-]                                                                                                                                                        |         |                              |
| Tekst før spørsmål                                                                                                                   | Generelt sett, i hvilken grad er du enig eller uenig i følgende påstander:                                                                                                              |         |                              |
| Spørsmålstekst                                                                                                                       | Dersom en arbeidsgiver gir deg en mobiltelefon som skal brukes til arbeid, bør arbeidsgiveren ha lov til å lese alle tekstmeldinger og e-poster du sender og mottar på denne telefonen. |         |                              |
| Instruksjoner til intervjueren                                                                                                       | [Spurt hvis u=3. ]                                                                                                                                                                      |         |                              |
| Kommentarer                                                                                                                          | Dersom en arbeidsgiver gir deg en mobiltelefon som skal brukes til arbeid, bør arbeidsgiveren ha lov til å lese alle te                                                                 |         |                              |
| Verdi                                                                                                                                | Merkelapp                                                                                                                                                                               | Enheter | Prosent                      |
| 1                                                                                                                                    | Svært enig                                                                                                                                                                              | 35      | <div><div></div></div> 0.7%  |
| 2                                                                                                                                    | Enig                                                                                                                                                                                    | 108     | <div><div></div></div> 2.3%  |
| 3                                                                                                                                    | Noe enig                                                                                                                                                                                | 85      | <div><div></div></div> 1.8%  |
| 4                                                                                                                                    | Verken enig eller uenig                                                                                                                                                                 | 72      | <div><div></div></div> 1.5%  |
| 5                                                                                                                                    | Noe uenig                                                                                                                                                                               | 96      | <div><div></div></div> 2.0%  |
| 6                                                                                                                                    | Uenig                                                                                                                                                                                   | 301     | <div><div></div></div> 6.4%  |
| 7                                                                                                                                    | Svært uenig                                                                                                                                                                             | 388     | <div><div></div></div> 8.3%  |
| 97                                                                                                                                   | Ikke svart                                                                                                                                                                              | 18      | <div><div></div></div> 0.4%  |
| 98                                                                                                                                   | Ikke spurt                                                                                                                                                                              | 3586    | <div><div></div></div> 76.5% |
| Advarsel: disse tallene indikerer antall enheter (cases) i datafilen. De kan ikke tolkes som oppsummert statistikk for populasjonen. |                                                                                                                                                                                         |         |                              |
| # r7pad10_3: Påstand: Ikke lov å bringe nabokonflikter til domstol før mekling                                                       |                                                                                                                                                                                         |         |                              |
| Informasjon                                                                                                                          | [Type= diskret] [Format=numeric] [Rekkevidde= 1-7] [Missing=*]                                                                                                                          |         |                              |
| Statistikk [NW/ W]                                                                                                                   | [Gyldige=4689 /-] [Ugyldig=0 /-]                                                                                                                                                        |         |                              |
| Tekst før spørsmål                                                                                                                   | Generelt sett, i hvilken grad er du enig eller uenig i følgende påstander:                                                                                                              |         |                              |

| # r7pad10_3: Påstand: Ikke lov å bringe nabokonflikter til domstol før mekling                                                       |                                                                                                                                                                              |         |             |       |
|--------------------------------------------------------------------------------------------------------------------------------------|------------------------------------------------------------------------------------------------------------------------------------------------------------------------------|---------|-------------|-------|
| Spørsmålstekst                                                                                                                       | Det bør ikke være lov å bringe nabokonflikter (for eksempel om høyde på trær og gjerder) inn for domstolene uten at man først har forsøkt å løse konflikten gjennom mekling. |         |             |       |
| Instruksjoner til intervjueren                                                                                                       | [Spurt hvis u=3. ]                                                                                                                                                           |         |             |       |
| Kommentarer                                                                                                                          | Det bør ikke være lov å bringe nabokonflikter (for eksempel om høyde på trær og gjerder) inn for domstolene uten at                                                          |         |             |       |
| Verdi                                                                                                                                | Merkelapp                                                                                                                                                                    | Enheter | Prosent     |       |
| 1                                                                                                                                    | Svært enig                                                                                                                                                                   | 422     | <div></div> | 9.0%  |
| 2                                                                                                                                    | Enig                                                                                                                                                                         | 483     | <div></div> | 10.3% |
| 3                                                                                                                                    | Noe enig                                                                                                                                                                     | 79      | <div></div> | 1.7%  |
| 4                                                                                                                                    | Verken enig eller uenig                                                                                                                                                      | 43      | <div></div> | 0.9%  |
| 5                                                                                                                                    | Noe uenig                                                                                                                                                                    | 14      | <div></div> | 0.3%  |
| 6                                                                                                                                    | Uenig                                                                                                                                                                        | 24      | <div></div> | 0.5%  |
| 7                                                                                                                                    | Svært uenig                                                                                                                                                                  | 16      | <div></div> | 0.3%  |
| 97                                                                                                                                   | Ikke svart                                                                                                                                                                   | 22      | <div></div> | 0.5%  |
| 98                                                                                                                                   | Ikke spurt                                                                                                                                                                   | 3586    | <div></div> | 76.5% |
| Advarsel: disse tallene indikerer antall enheter (cases) i datafilen. De kan ikke tolkes som oppsummert statistikk for populasjonen. |                                                                                                                                                                              |         |             |       |
| # r7k15_1: Er mennesker til å stole på?                                                                                              |                                                                                                                                                                              |         |             |       |
| Informasjon                                                                                                                          | [Type= diskret] [Format=numeric] [Rekkevidde= 1-11] [Missing=*]                                                                                                              |         |             |       |
| Statistikk [NW/ W]                                                                                                                   | [Gyldige=4689 /-] [Ugyldig=0 /-]                                                                                                                                             |         |             |       |
| Spørsmålstekst                                                                                                                       | Vil du si at de fleste mennesker i sin alminnelighet er til å stole på, eller mener du at man ikke kan være forsiktig nok når man har med andre å gjøre?                     |         |             |       |
| Tekst etter spørsmål                                                                                                                 | State your opinion on the scale below. This goes from 0 to 10, where 0 means "Cannot be careful enough" and 10 means "Most people can be trusted".                           |         |             |       |
| Instruksjoner til intervjueren                                                                                                       | [Alle respondenter spurt. ]                                                                                                                                                  |         |             |       |
| Kommentarer                                                                                                                          | R7K15_1 (Vil du si at de fleste mennesker i sin alminnelighet er til å stole på, eller mener du at man ikke kan være f                                                       |         |             |       |
| Verdi                                                                                                                                | Merkelapp                                                                                                                                                                    | Enheter | Prosent     |       |
| 1                                                                                                                                    | 0- Kan ikke være forsiktig nok                                                                                                                                               | 68      | <div></div> | 1.5%  |
| 2                                                                                                                                    | 1                                                                                                                                                                            | 50      | <div></div> | 1.1%  |
| 3                                                                                                                                    | 2                                                                                                                                                                            | 116     | <div></div> | 2.5%  |
| 4                                                                                                                                    | 3                                                                                                                                                                            | 242     | <div></div> | 5.2%  |
| 5                                                                                                                                    | 4                                                                                                                                                                            | 239     | <div></div> | 5.1%  |
| 6                                                                                                                                    | 5                                                                                                                                                                            | 537     | <div></div> | 11.5% |
| 7                                                                                                                                    | 6                                                                                                                                                                            | 506     | <div></div> | 10.8% |
| 8                                                                                                                                    | 7                                                                                                                                                                            | 1104    | <div></div> | 23.5% |
| 9                                                                                                                                    | 8                                                                                                                                                                            | 973     | <div></div> | 20.8% |
| 10                                                                                                                                   | 9                                                                                                                                                                            | 415     | <div></div> | 8.9%  |
| 11                                                                                                                                   | 10- De fleste er til å stole på                                                                                                                                              | 382     | <div></div> | 8.1%  |
| 97                                                                                                                                   | Ikke svart                                                                                                                                                                   | 57      | <div></div> | 1.2%  |
| Advarsel: disse tallene indikerer antall enheter (cases) i datafilen. De kan ikke tolkes som oppsummert statistikk for populasjonen. |                                                                                                                                                                              |         |             |       |
| # r7pad14_version: Velger en tilfeldig versjon av konjunksjonseksperimentet. Bakgrunnsvariabel til R7PAD14.                          |                                                                                                                                                                              |         |             |       |
| Informasjon                                                                                                                          | [Type= diskret] [Format=numeric] [Rekkevidde= 1-3] [Missing=*]                                                                                                               |         |             |       |
| Statistikk [NW/ W]                                                                                                                   | [Gyldige=4659 /-] [Ugyldig=30 /-]                                                                                                                                            |         |             |       |
| Instruksjoner til intervjueren                                                                                                       | [Velger tilfeldig antallet nyhetssaker og underholdningssaker, og hvordan disse skal kombineres.]                                                                            |         |             |       |

| # r7pad14_version: Velger en tilfeldig versjon av konjunksjonseksperimentet. Bakgrunnsvariabel til R7PAD14.                          |                                                                                      |         |                   |
|--------------------------------------------------------------------------------------------------------------------------------------|--------------------------------------------------------------------------------------|---------|-------------------|
| Verdi                                                                                                                                | Merkelapp                                                                            | Enheter | Prosent           |
| 1                                                                                                                                    | 4 nyhetsartikler                                                                     | 1576    | <div></div> 33.8% |
| 2                                                                                                                                    | 6 nyhetsartikler                                                                     | 1556    | <div></div> 33.4% |
| 3                                                                                                                                    | 4 nyhetsartikler og 2 underholdningsartikler                                         | 1527    | <div></div> 32.8% |
| Sysmiss                                                                                                                              |                                                                                      | 30      |                   |
| Advarsel: disse tallene indikerer antall enheter (cases) i datafilen. De kan ikke tolkes som oppsummert statistikk for populasjonen. |                                                                                      |         |                   |
| # r7pad14_selections: Antall artikler respondenten kan velge. Bakgrunnsvariabel til R7PAD14.                                         |                                                                                      |         |                   |
| Informasjon                                                                                                                          | [Type= diskret] [Format=numeric] [Rekkevidde= 1-3] [Missing=*]                       |         |                   |
| Statistikk [NW/ W]                                                                                                                   | [Gyldige=4659 /-] [Ugyldig=30 /-]                                                    |         |                   |
| Instruksjoner til intervjueren                                                                                                       | [Velger tilfeldig mellom 1 og 3, hvor mange artikler respondenten skal kunne velge.] |         |                   |
| Verdi                                                                                                                                | Merkelapp                                                                            | Enheter | Prosent           |
| 1                                                                                                                                    | 1 sak                                                                                | 1565    | <div></div> 33.6% |
| 2                                                                                                                                    | 2 saker                                                                              | 1497    | <div></div> 32.1% |
| 3                                                                                                                                    | 3 saker                                                                              | 1597    | <div></div> 34.3% |
| Sysmiss                                                                                                                              |                                                                                      | 30      |                   |
| Advarsel: disse tallene indikerer antall enheter (cases) i datafilen. De kan ikke tolkes som oppsummert statistikk for populasjonen. |                                                                                      |         |                   |
| # r7pad14_sourcesRan_1: Tilfeldig valgt kilde nr. 1. Bakgrunnsvariabel til konjunksjonseksperiment R7PAD14.                          |                                                                                      |         |                   |
| Informasjon                                                                                                                          | [Type= diskret] [Format=character] [Missing=*]                                       |         |                   |
| Statistikk [NW/ W]                                                                                                                   | [Gyldige=4689 /-] [Ugyldig=0 /-]                                                     |         |                   |
| Instruksjoner til intervjueren                                                                                                       | [Kilde nr. 1.]                                                                       |         |                   |
| Verdi                                                                                                                                | Merkelapp                                                                            | Enheter | Prosent           |
|                                                                                                                                      |                                                                                      | 30      | <div></div> 0.6%  |
| Aftenposten                                                                                                                          |                                                                                      | 660     | <div></div> 14.1% |
| Dagbladet                                                                                                                            |                                                                                      | 675     | <div></div> 14.4% |
| Dagens Næringsliv                                                                                                                    |                                                                                      | 636     | <div></div> 13.6% |
| Klassekampen                                                                                                                         |                                                                                      | 668     | <div></div> 14.2% |
| NRK                                                                                                                                  |                                                                                      | 682     | <div></div> 14.5% |
| TV2                                                                                                                                  |                                                                                      | 683     | <div></div> 14.6% |
| VG                                                                                                                                   |                                                                                      | 655     | <div></div> 14.0% |
| Advarsel: disse tallene indikerer antall enheter (cases) i datafilen. De kan ikke tolkes som oppsummert statistikk for populasjonen. |                                                                                      |         |                   |
| # r7pad14_sourcesRan_2: Tilfeldig valgt kilde nr. 2. Bakgrunnsvariabel til konjunksjonseksperiment R7PAD14.                          |                                                                                      |         |                   |
| Informasjon                                                                                                                          | [Type= diskret] [Format=character] [Missing=*]                                       |         |                   |
| Statistikk [NW/ W]                                                                                                                   | [Gyldige=4689 /-] [Ugyldig=0 /-]                                                     |         |                   |
| Instruksjoner til intervjueren                                                                                                       | [Kilde nr. 2.]                                                                       |         |                   |
| Verdi                                                                                                                                | Merkelapp                                                                            | Enheter | Prosent           |
|                                                                                                                                      |                                                                                      | 30      | <div></div> 0.6%  |
| Aftenposten                                                                                                                          |                                                                                      | 620     | <div></div> 13.2% |
| Dagbladet                                                                                                                            |                                                                                      | 688     | <div></div> 14.7% |
| Dagens Næringsliv                                                                                                                    |                                                                                      | 656     | <div></div> 14.0% |
| Klassekampen                                                                                                                         |                                                                                      | 670     | <div></div> 14.3% |

| # r7pad14_sourcesRan_2: Tilfeldig valgt kilde nr. 2. Bakgrunnsvariabel til konjunksjonseksperiment R7PAD14.                          |                                                |         |                   |
|--------------------------------------------------------------------------------------------------------------------------------------|------------------------------------------------|---------|-------------------|
| Verdi                                                                                                                                | Merkelapp                                      | Enheter | Prosent           |
| NRK                                                                                                                                  |                                                | 702     | <div></div> 15.0% |
| TV2                                                                                                                                  |                                                | 643     | <div></div> 13.7% |
| VG                                                                                                                                   |                                                | 680     | <div></div> 14.5% |
| Advarsel: disse tallene indikerer antall enheter (cases) i datafilen. De kan ikke tolkes som oppsummert statistikk for populasjonen. |                                                |         |                   |
| # r7pad14_sourcesRan_3: Tilfeldig valgt kilde nr. 3. Bakgrunnsvariabel til konjunksjonseksperiment R7PAD14.                          |                                                |         |                   |
| Informasjon                                                                                                                          | [Type= diskret] [Format=character] [Missing=*] |         |                   |
| Statistikk [NW/ W]                                                                                                                   | [Gyldige=4689 /-] [Ugyldig=0 /-]               |         |                   |
| Instruksjoner til intervjueren                                                                                                       | [Kilde nr. 3.]                                 |         |                   |
| Verdi                                                                                                                                | Merkelapp                                      | Enheter | Prosent           |
|                                                                                                                                      |                                                | 30      | <div></div> 0.6%  |
| Aftenposten                                                                                                                          |                                                | 673     | <div></div> 14.4% |
| Dagbladet                                                                                                                            |                                                | 656     | <div></div> 14.0% |
| Dagens Næringsliv                                                                                                                    |                                                | 689     | <div></div> 14.7% |
| Klassekampen                                                                                                                         |                                                | 655     | <div></div> 14.0% |
| NRK                                                                                                                                  |                                                | 653     | <div></div> 13.9% |
| TV2                                                                                                                                  |                                                | 663     | <div></div> 14.1% |
| VG                                                                                                                                   |                                                | 670     | <div></div> 14.3% |
| Advarsel: disse tallene indikerer antall enheter (cases) i datafilen. De kan ikke tolkes som oppsummert statistikk for populasjonen. |                                                |         |                   |
| # r7pad14_sourcesRan_4: Tilfeldig valgt kilde nr. 4. Bakgrunnsvariabel til konjunksjonseksperiment R7PAD14.                          |                                                |         |                   |
| Informasjon                                                                                                                          | [Type= diskret] [Format=character] [Missing=*] |         |                   |
| Statistikk [NW/ W]                                                                                                                   | [Gyldige=4689 /-] [Ugyldig=0 /-]               |         |                   |
| Instruksjoner til intervjueren                                                                                                       | [Kilde nr. 4.]                                 |         |                   |
| Verdi                                                                                                                                | Merkelapp                                      | Enheter | Prosent           |
|                                                                                                                                      |                                                | 30      | <div></div> 0.6%  |
| Aftenposten                                                                                                                          |                                                | 651     | <div></div> 13.9% |
| Dagbladet                                                                                                                            |                                                | 680     | <div></div> 14.5% |
| Dagens Næringsliv                                                                                                                    |                                                | 679     | <div></div> 14.5% |
| Klassekampen                                                                                                                         |                                                | 658     | <div></div> 14.0% |
| NRK                                                                                                                                  |                                                | 666     | <div></div> 14.2% |
| TV2                                                                                                                                  |                                                | 647     | <div></div> 13.8% |
| VG                                                                                                                                   |                                                | 678     | <div></div> 14.5% |
| Advarsel: disse tallene indikerer antall enheter (cases) i datafilen. De kan ikke tolkes som oppsummert statistikk for populasjonen. |                                                |         |                   |
| # r7pad14_sourcesRan_5: Tilfeldig valgt kilde nr. 5. Bakgrunnsvariabel til konjunksjonseksperiment R7PAD14.                          |                                                |         |                   |
| Informasjon                                                                                                                          | [Type= diskret] [Format=character] [Missing=*] |         |                   |
| Statistikk [NW/ W]                                                                                                                   | [Gyldige=4689 /-] [Ugyldig=0 /-]               |         |                   |
| Instruksjoner til intervjueren                                                                                                       | [Kilde nr. 5.]                                 |         |                   |
| Verdi                                                                                                                                | Merkelapp                                      | Enheter | Prosent           |
|                                                                                                                                      |                                                | 1606    | <div></div> 34.3% |
| Aftenposten                                                                                                                          |                                                | 443     | <div></div> 9.4%  |

| # r7pad14_sourcesRan_5: Tilfeldig valgt kilde nr. 5. Bakgrunnsvariabel til konjunksjonsekspirement R7PAD14.                                        |                                                                          |         |                   |
|----------------------------------------------------------------------------------------------------------------------------------------------------|--------------------------------------------------------------------------|---------|-------------------|
| Verdi                                                                                                                                              | Merkelapp                                                                | Enheter | Prosent           |
| Dagbladet                                                                                                                                          |                                                                          | 417     | <div></div> 8.9%  |
| Dagens Næringsliv                                                                                                                                  |                                                                          | 453     | <div></div> 9.7%  |
| Klassekampen                                                                                                                                       |                                                                          | 433     | <div></div> 9.2%  |
| NRK                                                                                                                                                |                                                                          | 478     | <div></div> 10.2% |
| TV2                                                                                                                                                |                                                                          | 427     | <div></div> 9.1%  |
| VG                                                                                                                                                 |                                                                          | 432     | <div></div> 9.2%  |
| Advarsel: disse tallene indikerer antall enheter (cases) i datafilen. De kan ikke tolkes som oppsummert statistikk for populasjonen.               |                                                                          |         |                   |
| # r7pad14_sourcesRan_6: Tilfeldig valgt kilde nr. 6. Bakgrunnsvariabel til konjunksjonsekspirement R7PAD14.                                        |                                                                          |         |                   |
| Informasjon                                                                                                                                        | [Type= diskret] [Format=character] [Missing=*]                           |         |                   |
| Statistikk [NW/ W]                                                                                                                                 | [Gyldige=4689 /-] [Ugyldig=0 /-]                                         |         |                   |
| Instruksjoner til intervjueren                                                                                                                     | [Kilde nr. 6.]                                                           |         |                   |
| Verdi                                                                                                                                              | Merkelapp                                                                | Enheter | Prosent           |
|                                                                                                                                                    |                                                                          | 1606    | <div></div> 34.3% |
| Aftenposten                                                                                                                                        |                                                                          | 441     | <div></div> 9.4%  |
| Dagbladet                                                                                                                                          |                                                                          | 474     | <div></div> 10.1% |
| Dagens Næringsliv                                                                                                                                  |                                                                          | 412     | <div></div> 8.8%  |
| Klassekampen                                                                                                                                       |                                                                          | 441     | <div></div> 9.4%  |
| NRK                                                                                                                                                |                                                                          | 444     | <div></div> 9.5%  |
| TV2                                                                                                                                                |                                                                          | 424     | <div></div> 9.0%  |
| VG                                                                                                                                                 |                                                                          | 447     | <div></div> 9.5%  |
| Advarsel: disse tallene indikerer antall enheter (cases) i datafilen. De kan ikke tolkes som oppsummert statistikk for populasjonen.               |                                                                          |         |                   |
| # r7pad14_likes01: Dikotom: tilfeldig valg om artiklene skal listes med anbefaling, eller ikke. Bakgrunnsvariabel konjunksjonsekspirement R7PAD14. |                                                                          |         |                   |
| Informasjon                                                                                                                                        | [Type= diskret] [Format=numeric] [Rekkevidde= 0-1] [Missing=*]           |         |                   |
| Statistikk [NW/ W]                                                                                                                                 | [Gyldige=4659 /-] [Ugyldig=30 /-]                                        |         |                   |
| Instruksjoner til intervjueren                                                                                                                     | [Velger tilfeldig om artiklene skal vises med anbefalinger, eller ikke.] |         |                   |
| Verdi                                                                                                                                              | Merkelapp                                                                | Enheter | Prosent           |
| 0                                                                                                                                                  | No                                                                       | 2374    | <div></div> 51.0% |
| 1                                                                                                                                                  | Yes                                                                      | 2285    | <div></div> 49.0% |
| Sysmiss                                                                                                                                            |                                                                          | 30      |                   |
| Advarsel: disse tallene indikerer antall enheter (cases) i datafilen. De kan ikke tolkes som oppsummert statistikk for populasjonen.               |                                                                          |         |                   |
| # r7pad14_likesRan_1: Tilfeldig valgt anbefaling nr. 1. Bakgrunnsvariabel til konjunksjonsekspirement R7PAD14.                                     |                                                                          |         |                   |
| Informasjon                                                                                                                                        | [Type= diskret] [Format=character] [Missing=*]                           |         |                   |
| Statistikk [NW/ W]                                                                                                                                 | [Gyldige=4689 /-] [Ugyldig=0 /-]                                         |         |                   |
| Instruksjoner til intervjueren                                                                                                                     | [Hvis anbefalinger skal listes: anbefaling nr. 1.]                       |         |                   |
| Verdi                                                                                                                                              | Merkelapp                                                                | Enheter | Prosent           |
|                                                                                                                                                    |                                                                          | 2404    | <div></div> 51.3% |
| 0 personer anbefaler                                                                                                                               |                                                                          | 754     | <div></div> 16.1% |

### # r7pad14\_likesRan\_1: Tilfeldig valgt anbefaling nr. 1. Bakgrunnsvariabel til konjunksjonseksperiment R7PAD14.

| Verdi                   | Merkelapp | Enheter | Prosent |
|-------------------------|-----------|---------|---------|
| 1054 personer anbefaler |           | 261     | 5.6%    |
| 106 personer anbefaler  |           | 269     | 5.7%    |
| 1133 personer anbefaler |           | 278     | 5.9%    |
| 1211 personer anbefaler |           | 236     | 5.0%    |
| 95 personer anbefaler   |           | 248     | 5.3%    |
| 98 personer anbefaler   |           | 239     | 5.1%    |

Advarsel: disse tallene indikerer antall enheter (cases) i datafilen. De kan ikke tolkes som oppsummert statistikk for populasjonen.

### # r7pad14\_likesRan\_2: Tilfeldig valgt anbefaling nr. 2. Bakgrunnsvariabel til konjunksjonseksperiment R7PAD14.

|                                       |                                                    |
|---------------------------------------|----------------------------------------------------|
| <b>Informasjon</b>                    | [Type= diskret] [Format=character] [Missing=*]     |
| <b>Statistikk [NW/ W]</b>             | [Gyldige=4689 /-] [Ugyldig=0 /-]                   |
| <b>Instruksjoner til intervjueren</b> | [Hvis anbefalinger skal listes: anbefaling nr. 2.] |

| Verdi                   | Merkelapp | Enheter | Prosent |
|-------------------------|-----------|---------|---------|
|                         |           | 2404    | 51.3%   |
| 0 personer anbefaler    |           | 751     | 16.0%   |
| 1054 personer anbefaler |           | 256     | 5.5%    |
| 106 personer anbefaler  |           | 245     | 5.2%    |
| 1133 personer anbefaler |           | 235     | 5.0%    |
| 1211 personer anbefaler |           | 279     | 6.0%    |
| 95 personer anbefaler   |           | 244     | 5.2%    |
| 98 personer anbefaler   |           | 275     | 5.9%    |

Advarsel: disse tallene indikerer antall enheter (cases) i datafilen. De kan ikke tolkes som oppsummert statistikk for populasjonen.

### # r7pad14\_likesRan\_3: Tilfeldig valgt anbefaling nr. 3. Bakgrunnsvariabel til konjunksjonseksperiment R7PAD14.

|                                       |                                                    |
|---------------------------------------|----------------------------------------------------|
| <b>Informasjon</b>                    | [Type= diskret] [Format=character] [Missing=*]     |
| <b>Statistikk [NW/ W]</b>             | [Gyldige=4689 /-] [Ugyldig=0 /-]                   |
| <b>Instruksjoner til intervjueren</b> | [Hvis anbefalinger skal listes: anbefaling nr. 3.] |

| Verdi                   | Merkelapp | Enheter | Prosent |
|-------------------------|-----------|---------|---------|
|                         |           | 2404    | 51.3%   |
| 0 personer anbefaler    |           | 768     | 16.4%   |
| 1054 personer anbefaler |           | 258     | 5.5%    |
| 106 personer anbefaler  |           | 237     | 5.1%    |

# r7pad14\_likesRan\_3: Tilfeldig valgt anbefaling nr. 3. Bakgrunnsvariabel til konjunksjonseksperiment R7PAD14.

| Verdi                   | Merkelapp | Enheter | Prosent |
|-------------------------|-----------|---------|---------|
| 1133 personer anbefaler |           | 264     | 5.6%    |
| 1211 personer anbefaler |           | 250     | 5.3%    |
| 95 personer anbefaler   |           | 274     | 5.8%    |
| 98 personer anbefaler   |           | 234     | 5.0%    |

*Advarsel: disse tallene indikerer antall enheter (cases) i datafilen. De kan ikke tolkes som oppsummert statistikk for populasjonen.*

| # r7pad14_likesRan_4: Tilfeldig valgt anbefaling nr. 4. Bakgrunnsvariabel til konjunksjonseksperiment R7PAD14.                       |                                                    |         |                   |
|--------------------------------------------------------------------------------------------------------------------------------------|----------------------------------------------------|---------|-------------------|
| Informasjon                                                                                                                          | [Type= diskret] [Format=character] [Missing=*]     |         |                   |
| Statistikk [NW/ W]                                                                                                                   | [Gyldige=4689 /-] [Ugyldig=0 /-]                   |         |                   |
| Instruksjoner til intervjueren                                                                                                       | [Hvis anbefalinger skal listes: anbefaling nr. 4.] |         |                   |
| Verdi                                                                                                                                | Merkelapp                                          | Enheter | Prosent           |
|                                                                                                                                      |                                                    | 2404    | <div></div> 51.3% |
| 0 personer anbefaler                                                                                                                 |                                                    | 719     | <div></div> 15.3% |
| 1054 personer anbefaler                                                                                                              |                                                    | 243     | <div></div> 5.2%  |
| 106 personer anbefaler                                                                                                               |                                                    | 270     | <div></div> 5.8%  |
| 1133 personer anbefaler                                                                                                              |                                                    | 250     | <div></div> 5.3%  |
| 1211 personer anbefaler                                                                                                              |                                                    | 276     | <div></div> 5.9%  |
| 95 personer anbefaler                                                                                                                |                                                    | 266     | <div></div> 5.7%  |
| 98 personer anbefaler                                                                                                                |                                                    | 261     | <div></div> 5.6%  |
| Advarsel: disse tallene indikerer antall enheter (cases) i datafilen. De kan ikke tolkes som oppsummert statistikk for populasjonen. |                                                    |         |                   |
| # r7pad14_likesRan_5: Tilfeldig valgt anbefaling nr. 5. Bakgrunnsvariabel til konjunksjonseksperiment R7PAD14.                       |                                                    |         |                   |
| Informasjon                                                                                                                          | [Type= diskret] [Format=character] [Missing=*]     |         |                   |
| Statistikk [NW/ W]                                                                                                                   | [Gyldige=4689 /-] [Ugyldig=0 /-]                   |         |                   |
| Instruksjoner til intervjueren                                                                                                       | [Hvis anbefalinger skal listes: anbefaling nr. 5.] |         |                   |
| Verdi                                                                                                                                | Merkelapp                                          | Enheter | Prosent           |
|                                                                                                                                      |                                                    | 3175    | <div></div> 67.7% |
| 0 personer anbefaler                                                                                                                 |                                                    | 497     | <div></div> 10.6% |
| 1054 personer anbefaler                                                                                                              |                                                    | 158     | <div></div> 3.4%  |
| 106 personer anbefaler                                                                                                               |                                                    | 175     | <div></div> 3.7%  |
| 1133 personer anbefaler                                                                                                              |                                                    | 168     | <div></div> 3.6%  |
| 1211 personer anbefaler                                                                                                              |                                                    | 175     | <div></div> 3.7%  |
| 95 personer anbefaler                                                                                                                |                                                    | 167     | <div></div> 3.6%  |
| 98 personer anbefaler                                                                                                                |                                                    | 174     | <div></div> 3.7%  |
| Advarsel: disse tallene indikerer antall enheter (cases) i datafilen. De kan ikke tolkes som oppsummert statistikk for populasjonen. |                                                    |         |                   |
| # r7pad14_likesRan_6: Tilfeldig valgt anbefaling nr. 6. Bakgrunnsvariabel til konjunksjonseksperiment R7PAD14.                       |                                                    |         |                   |
| Informasjon                                                                                                                          | [Type= diskret] [Format=character] [Missing=*]     |         |                   |
| Statistikk [NW/ W]                                                                                                                   | [Gyldige=4689 /-] [Ugyldig=0 /-]                   |         |                   |
| Instruksjoner til intervjueren                                                                                                       | [Hvis anbefalinger skal listes: anbefaling nr. 6.] |         |                   |



# **# r7pad14\_likesRan\_6: Tilfeldig valgt anbefaling nr. 6. Bakgrunnsvariabel til konjunksjonsekspirement R7PAD14.**

| Verdi                   | Merkelapp | Enheter | Prosent                      |
|-------------------------|-----------|---------|------------------------------|
|                         |           | 3175    | <div><div></div></div> 67.7% |
| 0 personer anbefaler    |           | 511     | <div><div></div></div> 10.9% |
| 1054 personer anbefaler |           | 167     | <div><div></div></div> 3.6%  |
| 106 personer anbefaler  |           | 188     | <div><div></div></div> 4.0%  |
| 1133 personer anbefaler |           | 169     | <div><div></div></div> 3.6%  |
| 1211 personer anbefaler |           | 144     | <div><div></div></div> 3.1%  |
| 95 personer anbefaler   |           | 164     | <div><div></div></div> 3.5%  |
| 98 personer anbefaler   |           | 171     | <div><div></div></div> 3.6%  |

Advarsel: disse tallene indikerer antall enheter (cases) i datafilen. De kan ikke tolkes som oppsummert statistikk for populasjonen.

## **# r7pad14\_headlinesRan\_1: Tilfeldig valgt artikkeloverskrift nr. 1. Bakgrunnsvariabel til konjunksjonsekspirement R7PAD14.**

|                                |                                                                                                                                                                                                                                 |
|--------------------------------|---------------------------------------------------------------------------------------------------------------------------------------------------------------------------------------------------------------------------------|
| Informasjon                    | [Type= diskret] [Format=character] [Missing=*]                                                                                                                                                                                  |
| Statistikk [NW/ W]             | [Gyldige=4689 /-] [Ugyldig=0 /-]                                                                                                                                                                                                |
| Instruksjoner til intervjueren | [Lagrer en tilfeldig valgt nyhetsartikkel eller underholdningsartikkel fra en populasjon av 1296 nyhetsartikler og 36 underholdningsartikler. Kontakt Sveinung Arnesen eller Mikael Johannesson for den fullstendige listen. .] |

## **# r7pad14\_headlinesRan\_2: Tilfeldig valgt artikkeloverskrift nr. 2. Bakgrunnsvariabel til konjunksjonsekspirement R7PAD14.**

|                                |                                                                                                                                                                                                                                 |
|--------------------------------|---------------------------------------------------------------------------------------------------------------------------------------------------------------------------------------------------------------------------------|
| Informasjon                    | [Type= diskret] [Format=character] [Missing=*]                                                                                                                                                                                  |
| Statistikk [NW/ W]             | [Gyldige=4689 /-] [Ugyldig=0 /-]                                                                                                                                                                                                |
| Instruksjoner til intervjueren | [Lagrer en tilfeldig valgt nyhetsartikkel eller underholdningsartikkel fra en populasjon av 1296 nyhetsartikler og 36 underholdningsartikler. Kontakt Sveinung Arnesen eller Mikael Johannesson for den fullstendige listen. .] |

## **# r7pad14\_headlinesRan\_3: Tilfeldig valgt artikkeloverskrift nr. 3. Bakgrunnsvariabel til konjunksjonsekspirement R7PAD14.**

|                                |                                                                                                                                                                                                                                 |
|--------------------------------|---------------------------------------------------------------------------------------------------------------------------------------------------------------------------------------------------------------------------------|
| Informasjon                    | [Type= diskret] [Format=character] [Missing=*]                                                                                                                                                                                  |
| Statistikk [NW/ W]             | [Gyldige=4689 /-] [Ugyldig=0 /-]                                                                                                                                                                                                |
| Instruksjoner til intervjueren | [Lagrer en tilfeldig valgt nyhetsartikkel eller underholdningsartikkel fra en populasjon av 1296 nyhetsartikler og 36 underholdningsartikler. Kontakt Sveinung Arnesen eller Mikael Johannesson for den fullstendige listen. .] |

## **# r7pad14\_headlinesRan\_4: Tilfeldig valgt artikkeloverskrift nr. 4. Bakgrunnsvariabel til konjunksjonsekspirement R7PAD14.**

|                                |                                                                                                                                                                                                                                 |
|--------------------------------|---------------------------------------------------------------------------------------------------------------------------------------------------------------------------------------------------------------------------------|
| Informasjon                    | [Type= diskret] [Format=character] [Missing=*]                                                                                                                                                                                  |
| Statistikk [NW/ W]             | [Gyldige=4689 /-] [Ugyldig=0 /-]                                                                                                                                                                                                |
| Instruksjoner til intervjueren | [Lagrer en tilfeldig valgt nyhetsartikkel eller underholdningsartikkel fra en populasjon av 1296 nyhetsartikler og 36 underholdningsartikler. Kontakt Sveinung Arnesen eller Mikael Johannesson for den fullstendige listen. .] |

## **# r7pad14\_headlinesRan\_5: Tilfeldig valgt artikkeloverskrift nr. 5. Bakgrunnsvariabel til konjunksjonsekspirement R7PAD14.**

|                                |                                                                                                                                                                                                                                 |
|--------------------------------|---------------------------------------------------------------------------------------------------------------------------------------------------------------------------------------------------------------------------------|
| Informasjon                    | [Type= diskret] [Format=character] [Missing=*]                                                                                                                                                                                  |
| Statistikk [NW/ W]             | [Gyldige=4689 /-] [Ugyldig=0 /-]                                                                                                                                                                                                |
| Instruksjoner til intervjueren | [Lagrer en tilfeldig valgt nyhetsartikkel eller underholdningsartikkel fra en populasjon av 1296 nyhetsartikler og 36 underholdningsartikler. Kontakt Sveinung Arnesen eller Mikael Johannesson for den fullstendige listen. .] |

# r7pad14\_headlinesRan\_5: Tilfeldig valgt artikkeloverskrift nr. 5. Bakgrunnsvariabel til konjunksjonseksperiment R7PAD14.

| Verdi                                                     | Merkelapp | Enheter | Prosent |
|-----------------------------------------------------------|-----------|---------|---------|
|                                                           |           | 1606    | 34.3%   |
| Ap-politiker fordømmes etter Facebook-innlegg: «vi tren   |           | 3       | 0.1%    |
| Ap-politiker får kjeft for forslag som vil redusere inn   |           | 1       | 0.0%    |
| Ap-politiker får kjeft for forslag som vil øke inntekts   |           | 1       | 0.0%    |
| Ap-politiker får massiv støtte - vil ikke åpne flere ol   |           | 3       | 0.1%    |
| Ap-politiker får massiv støtte - vil åpne flere oljefel   |           | 2       | 0.0%    |
| Ap-politiker får pepper for forslag: vil privatisere NS   |           | 2       | 0.0%    |
| Ap-politiker får ros etter facebook-status: «Homofile p   |           | 3       | 0.1%    |
| Ap-politiker får skryt for forslag som vil redusere inn   |           | 4       | 0.1%    |
| Ap-politiker får skryt for forslag som vil øke inntekts   |           | 2       | 0.0%    |
| Ap-politiker får skryt for forslag: vil nekte privatisere |           | 1       | 0.0%    |
| Ap-politiker får skryt for forslag: vil privatisere NSB   |           | 1       | 0.0%    |
| Ap-politiker hudflettes etter homofiendtlig lovforslag    |           | 4       | 0.1%    |
| Ap-politiker hudflettes etter homovennlig lovforslag      |           | 3       | 0.1%    |
| Ap-politiker hudflettes: mener det burde være vanskelig   |           | 2       | 0.0%    |

# r7pad14\_headlinesRan\_5: Tilfeldig valgt artikkeloverskrift nr. 5. Bakgrunnsvariabel til konjunksjonseksperiment R7PAD14.

| Verdi                                                       | Merkelapp | Enheter | Prosent |
|-------------------------------------------------------------|-----------|---------|---------|
| Ap-politiker hylles ? mener det er bedre med flere kult     |           | 4       | 0.1%    |
| Ap-politiker hylles ? mener det er bedre med færre kult     |           | 3       | 0.1%    |
| Ap-politiker lovprises etter Facebook-innlegg: «vi tren     |           | 3       | 0.1%    |
| Ap-politiker lovprises etter homofiendtlig lovforslag       |           | 3       | 0.1%    |
| Ap-politiker lovprises etter homovennlig lovforslag         |           | 4       | 0.1%    |
| Ap-politiker lovprises: mener det burde være vanskelige     |           | 2       | 0.0%    |
| Ap-politiker lovprises: mener det ikke burde være vanskelig |           | 5       | 0.1%    |
| Ap-politiker med Facebook-innlegg: «vi trenger flere mu     |           | 1       | 0.0%    |
| Ap-politiker med Facebook-innlegg: «vi trenger ikke fle     |           | 2       | 0.0%    |
| Ap-politiker med forslag som vil redusere inntektsforsk     |           | 3       | 0.1%    |
| Ap-politiker med forslag som vil øke inntektsforskjelle     |           | 2       | 0.0%    |
| Ap-politiker med homofiendtlig lovforslag                   |           | 2       | 0.0%    |
| Ap-politiker med homovennlig lovforslag                     |           | 2       | 0.0%    |
| Ap-politiker mener alle offentlige aktiviteter ikke kan     |           | 5       | 0.1%    |
| Ap-politiker mener alle offentlige                          |           | 3       | 0.1%    |

# r7pad14\_headlinesRan\_5: Tilfeldig valgt artikkeloverskrift nr. 5. Bakgrunnsvariabel til konjunksjonseksperiment R7PAD14.

| Verdi                                                               | Merkelapp | Enheter | Prosent |
|---------------------------------------------------------------------|-----------|---------|---------|
| aktiviteter kan<br>gjør                                             |           |         |         |
| Ap-politiker<br>mener det<br>burde være<br>vanskeligere for<br>homo |           | 8       | 0.2%    |
| Ap-politiker<br>mener det er<br>bedre med flere<br>kulturer og r    |           | 2       | 0.0%    |
| Ap-politiker<br>mener det er<br>bedre med færre<br>kulturer og r    |           | 5       | 0.1%    |
| Ap-politiker<br>mener det ikke<br>burde være<br>vanskeligere for    |           | 2       | 0.0%    |
| Ap-politiker<br>mener<br>flyktninger bør<br>ha samme rett til<br>so |           | 5       | 0.1%    |
| Ap-politiker<br>mener<br>flyktninger ikke<br>bør ha samme<br>rett t |           | 15      | 0.3%    |
| Ap-politiker<br>møter massiv<br>motstand - vil<br>ikke åpne fler    |           | 3       | 0.1%    |
| Ap-politiker<br>presenterer<br>forslag: vil nekte<br>privatiseri    |           | 3       | 0.1%    |
| Ap-politiker<br>presenterer<br>forslag: vil<br>privatisere NSB      |           | 4       | 0.1%    |
| Ap-politiker<br>på Facebook:<br>«Homofile par<br>MÅ IKKE få<br>like |           | 2       | 0.0%    |
| Ap-politiker<br>skjelles ut ?<br>mener det er<br>bedre med flere    |           | 4       | 0.1%    |
| Ap-politiker vil<br>ikke åpne flere<br>oljefelt i nord              |           | 3       | 0.1%    |
| Ap-politiker<br>vil åpne flere<br>oljefelt i nord                   |           | 3       | 0.1%    |
| Ap-profil blir<br>hedret etter                                      |           | 1       | 0.0%    |

# r7pad14\_headlinesRan\_5: Tilfeldig valgt artikkeloverskrift nr. 5. Bakgrunnsvariabel til konjunksjonseksperiment R7PAD14.

| Verdi                                                    | Merkelapp | Enheter | Prosent |
|----------------------------------------------------------|-----------|---------|---------|
| twittermelding ? vil stenge                              |           |         |         |
| Ap-profil blir hedret etter twittermelding ? vil åpne f  |           | 2       | 0.0%    |
| Ap-profil blir latterliggjort etter twittermelding ? vil |           | 4       | 0.1%    |
| Ap-profil i åpent brev: «jeg vil IKKE at flyktinger ska  |           | 5       | 0.1%    |
| Ap-profil i åpent brev: «jeg vil at flyktinger skal få   |           | 2       | 0.0%    |
| Ap-profil lanserer forslag om flere privatskoler i Norg  |           | 3       | 0.1%    |
| Ap-profil lanserer forslag om færre privatskoler i Norg  |           | 3       | 0.1%    |
| Ap-profil mener at kommersielle skoler bør forbys        |           | 3       | 0.1%    |
| Ap-profil mener at kommersielle skoler bør tillates      |           | 2       | 0.0%    |
| Ap-profil møter begeistring - mener at kommersielle sko  |           | 2       | 0.0%    |
| Ap-profil møter begeistring for forslag om flere privat  |           | 2       | 0.0%    |
| Ap-profil møter proteststorm - mener at kommersielle sk  |           | 3       | 0.1%    |
| Ap-profil møter proteststorm for forslag om flere priva  |           | 2       | 0.0%    |
| Ap-profil på twitter: vil stenge for oljeboring i nord   |           | 3       | 0.1%    |
| Ap-profil på twitter: vil åpne                           |           | 4       | 0.1%    |

# r7pad14\_headlinesRan\_5: Tilfeldig valgt artikkeloverskrift nr. 5. Bakgrunnsvariabel til konjunksjonseksperiment R7PAD14.

| Verdi                                                   | Merkelapp | Enheter | Prosent |
|---------------------------------------------------------|-----------|---------|---------|
| for oljeboring i nord                                   |           |         |         |
| Ap-representant refses ? vil sikre at ingen private sko |           | 2       | 0.0%    |
| Ap-representant refses ? vil åpne for at noen private s |           | 3       | 0.1%    |
| Ap-representant roses ? vil åpne for at noen private sk |           | 1       | 0.0%    |
| Ap-representant vil sikre at ingen private skoler skal  |           | 2       | 0.0%    |
| Ap-representant vil åpne for at noen private skoler ska |           | 3       | 0.1%    |
| Ap-topp kjemper for oljeboring i Lofoten                |           | 3       | 0.1%    |
| Ap-topp kjemper for oljeboring i Lofoten - får massiv s |           | 3       | 0.1%    |
| Ap-topp kjemper for oljeboring i Lofoten - møter massiv |           | 4       | 0.1%    |
| Ap-topp kjemper mot oljeboring i Lofoten                |           | 1       | 0.0%    |
| Ap-topp kjemper mot oljeboring i Lofoten - får massiv s |           | 4       | 0.1%    |
| Ap-topp mener at skattenivået burde reduseres           |           | 5       | 0.1%    |
| Ap-topp mener at skattenivået ikke burde reduseres      |           | 2       | 0.0%    |
| Ap-topp presser på for å gi NAV-penger til Syriske flyk |           | 2       | 0.0%    |
| Ap-topp truer med å ta NAV-penger fra Syriske flyktinge |           | 6       | 0.1%    |
| Ap-topp vil gi mer til de rike                          |           | 4       | 0.1%    |

# r7pad14\_headlinesRan\_5: Tilfeldig valgt artikkeloverskrift nr. 5. Bakgrunnsvariabel til konjunksjonseksperiment R7PAD14.

| Verdi                                                    | Merkelapp | Enheter | Prosent |
|----------------------------------------------------------|-----------|---------|---------|
| Ap-topp vil gi mer til de rike - blir refset             |           | 1       | 0.0%    |
| Ap-topp vil ta mer fra de rike                           |           | 2       | 0.0%    |
| Ap-topp vil ta mer fra de rike - blir refset             |           | 2       | 0.0%    |
| Ap-topp vil ta mer fra de rike - blir roset              |           | 3       | 0.1%    |
| Ap-topp: Vil avskaffe eiendomsskatten i alle norske byer |           | 2       | 0.0%    |
| Ap-topp: Vil innføre eiendomsskatt i alle norske byer.   |           | 2       | 0.0%    |
| Denne restauranten er testet av våre anmeldere           |           | 16      | 0.3%    |
| Denne restauranten må du prøve mener våre anmeldere      |           | 15      | 0.3%    |
| Denne restauranten må du unngå mener våre anmeldere      |           | 13      | 0.3%    |
| Dette er det beste for å gå ned i vekt                   |           | 10      | 0.2%    |
| Dette er det verste for å gå ned i vekt                  |           | 9       | 0.2%    |
| Dette er høstens treningstrend                           |           | 17      | 0.4%    |
| Dette kan du gjøre for å ned i vekt                      |           | 20      | 0.4%    |
| Disse TV-ene er med i vår nye test                       |           | 11      | 0.2%    |
| Disse TV-ene kommer best ut i vår nye test               |           | 17      | 0.4%    |
| Disse TV-ene kommer verst ut i vår nye test              |           | 7       | 0.1%    |
| Flere jubler: Ap-topp mener at skattenivået burde redus  |           | 1       | 0.0%    |
| Flere jubler: Frp-topp mener                             |           | 1       | 0.0%    |

# r7pad14\_headlinesRan\_5: Tilfeldig valgt artikkeloverskrift nr. 5. Bakgrunnsvariabel til konjunksjonseksperiment R7PAD14.

| Verdi                                                   | Merkelapp | Enheter | Prosent |
|---------------------------------------------------------|-----------|---------|---------|
| at skattenivået burde redu                              |           |         |         |
| Flere jubler: Frp-topp mener at skattenivået ikke burde |           | 5       | 0.1%    |
| Flere jubler: Høyre-topp mener at skattenivået burde re |           | 1       | 0.0%    |
| Flere jubler: Høyre-topp mener at skattenivået ikke bur |           | 4       | 0.1%    |
| Flere jubler: Krf-topp mener at skattenivået burde redu |           | 1       | 0.0%    |
| Flere jubler: Mdg-topp mener at skattenivået burde redu |           | 3       | 0.1%    |
| Flere jubler: Mdg-topp mener at skattenivået ikke burde |           | 4       | 0.1%    |
| Flere jubler: Rødt-topp mener at skattenivået burde red |           | 2       | 0.0%    |
| Flere jubler: Rødt-topp mener at skattenivået ikke burd |           | 2       | 0.0%    |
| Flere jubler: Sp-topp mener at skattenivået burde redus |           | 1       | 0.0%    |
| Flere jubler: Sp-topp mener at skattenivået ikke burde  |           | 3       | 0.1%    |
| Flere jubler: Sv-topp mener at skattenivået ikke burde  |           | 1       | 0.0%    |
| Flere jubler: Venstre-topp mener at skattenivået burde  |           | 2       | 0.0%    |
| Flere jubler: Venstre-topp mener at skattenivået ikke b |           | 3       | 0.1%    |



# r7pad14\_headlinesRan\_5: Tilfeldig valgt artikkeloverskrift nr. 5. Bakgrunnsvariabel til konjunksjonseksperiment R7PAD14.

| Verdi                                                               | Merkelapp | Enheter | Prosent |
|---------------------------------------------------------------------|-----------|---------|---------|
| Flere stormer:<br>Ap-topp mener<br>at skattenivået<br>burde redu    |           | 2       | 0.0%    |
| Flere stormer:<br>Ap-topp mener<br>at skattenivået<br>ikke burde    |           | 2       | 0.0%    |
| Flere stormer:<br>Frp-topp mener<br>at skattenivået<br>burde red    |           | 4       | 0.1%    |
| Flere stormer:<br>Frp-topp mener<br>at skattenivået<br>ikke burd    |           | 3       | 0.1%    |
| Flere stormer:<br>Høyre-topp<br>mener at<br>skattenivået ikke<br>bu |           | 1       | 0.0%    |
| Flere stormer:<br>Krf-topp mener<br>at skattenivået<br>burde red    |           | 2       | 0.0%    |
| Flere stormer:<br>Krf-topp mener<br>at skattenivået<br>ikke burd    |           | 1       | 0.0%    |
| Flere stormer:<br>Mdg-topp mener<br>at skattenivået<br>burde red    |           | 2       | 0.0%    |
| Flere stormer:<br>Mdg-topp mener<br>at skattenivået<br>ikke burd    |           | 2       | 0.0%    |
| Flere stormer:<br>Rødt-topp mener<br>at skattenivået<br>burde re    |           | 2       | 0.0%    |
| Flere stormer:<br>Sp-topp mener<br>at skattenivået<br>burde redu    |           | 1       | 0.0%    |
| Flere stormer:<br>Sv-topp mener<br>at skattenivået<br>burde redu    |           | 2       | 0.0%    |
| Flere stormer:<br>Sv-topp mener at<br>skattenivået ikke<br>burde    |           | 1       | 0.0%    |
| Flere stormer:<br>Venstre-topp<br>mener at<br>skattenivået ikke     |           | 1       | 0.0%    |

# r7pad14\_headlinesRan\_5: Tilfeldig valgt artikkeloverskrift nr. 5. Bakgrunnsvariabel til konjunksjonseksperiment R7PAD14.

| Verdi                                                   | Merkelapp | Enheter | Prosent |
|---------------------------------------------------------|-----------|---------|---------|
| Foreslår å la kommunen ta seg av eldreomsorgen, ansvarl |           | 65      | 1.4%    |
| Foreslår å privatisere eldreomsorgen, ansvarlig Ap-poli |           | 6       | 0.1%    |
| Foreslår å privatisere eldreomsorgen, ansvarlig Frp-pol |           | 5       | 0.1%    |
| Foreslår å privatisere eldreomsorgen, ansvarlig Høyre-p |           | 8       | 0.2%    |
| Foreslår å privatisere eldreomsorgen, ansvarlig Krf-pol |           | 8       | 0.2%    |
| Foreslår å privatisere eldreomsorgen, ansvarlig Mdg-pol |           | 4       | 0.1%    |
| Foreslår å privatisere eldreomsorgen, ansvarlig Rødt-po |           | 7       | 0.1%    |
| Foreslår å privatisere eldreomsorgen, ansvarlig Sp-poli |           | 9       | 0.2%    |
| Foreslår å privatisere eldreomsorgen, ansvarlig Sv-poli |           | 6       | 0.1%    |
| Foreslår å privatisere eldreomsorgen, ansvarlig Venstre |           | 10      | 0.2%    |
| Forslag fra Ap-topp som vil redusere lønnsforskjeller   |           | 1       | 0.0%    |
| Forslag fra Ap-topp som vil øke lønnsforskjeller        |           | 1       | 0.0%    |
| Forslag fra Frp-topp som vil redusere lønnsforskjeller  |           | 4       | 0.1%    |

# r7pad14\_headlinesRan\_5: Tilfeldig valgt artikkeloverskrift nr. 5. Bakgrunnsvariabel til konjunksjonseksperiment R7PAD14.

| Verdi                                                   | Merkelapp | Enheter | Prosent |
|---------------------------------------------------------|-----------|---------|---------|
| Forslag fra Frp-topp som vil øke lønnsforskjeller       |           | 1       | 0.0%    |
| Forslag fra Høyre-topp som vil redusere lønnsforskjelle |           | 3       | 0.1%    |
| Forslag fra Høyre-topp som vil øke lønnsforskjeller     |           | 2       | 0.0%    |
| Forslag fra Krf-topp som vil redusere lønnsforskjeller  |           | 4       | 0.1%    |
| Forslag fra Krf-topp som vil øke lønnsforskjeller       |           | 4       | 0.1%    |
| Forslag fra Mdg-topp som vil redusere lønnsforskjeller  |           | 3       | 0.1%    |
| Forslag fra Mdg-topp som vil øke lønnsforskjeller       |           | 2       | 0.0%    |
| Forslag fra Rødt-topp som vil redusere lønnsforskjeller |           | 3       | 0.1%    |
| Forslag fra Rødt-topp som vil øke lønnsforskjeller      |           | 2       | 0.0%    |
| Forslag fra Sp-topp som vil redusere lønnsforskjeller   |           | 2       | 0.0%    |
| Forslag fra Sv-topp som vil redusere lønnsforskjeller   |           | 1       | 0.0%    |
| Forslag fra Sv-topp som vil øke lønnsforskjeller        |           | 3       | 0.1%    |
| Forslag fra Venstre-topp som vil redusere lønnsforskjel |           | 2       | 0.0%    |
| Forslag fra Venstre-topp som vil øke lønnsforskjeller   |           | 2       | 0.0%    |
| Frp-politiker fordømmes etter Facebook-innlegg: «vi tre |           | 2       | 0.0%    |
| Frp-politiker får kjeft for forslag                     |           | 6       | 0.1%    |

# r7pad14\_headlinesRan\_5: Tilfeldig valgt artikkeloverskrift nr. 5. Bakgrunnsvariabel til konjunksjonseksperiment R7PAD14.

| Verdi                                                   | Merkelapp | Enheter | Prosent |
|---------------------------------------------------------|-----------|---------|---------|
| som vil redusere in                                     |           |         |         |
| Frp-politiker får kjeft for forslag som vil øke inntekt |           | 4       | 0.1%    |
| Frp-politiker får kritikk etter facebook-status: «Homof |           | 6       | 0.1%    |
| Frp-politiker får massiv støtte - vil ikke åpne flere o |           | 4       | 0.1%    |
| Frp-politiker får massiv støtte - vil åpne flere oljefe |           | 1       | 0.0%    |
| Frp-politiker får pepper for forslag: vil nekte privati |           | 1       | 0.0%    |
| Frp-politiker får ros etter facebook-status: «Homofile  |           | 1       | 0.0%    |
| Frp-politiker får skryt for forslag som vil redusere in |           | 2       | 0.0%    |
| Frp-politiker får skryt for forslag som vil øke inntekt |           | 2       | 0.0%    |
| Frp-politiker får skryt for forslag: vil nekte privatis |           | 5       | 0.1%    |
| Frp-politiker får skryt for forslag: vil privatisere NS |           | 1       | 0.0%    |
| Frp-politiker hudflettes etter homofiendtlig lovforslag |           | 1       | 0.0%    |
| Frp-politiker hudflettes: mener det burde være vanskel  |           | 4       | 0.1%    |
| Frp-politiker hudflettes: mener det ikke burde være van |           | 4       | 0.1%    |
| Frp-politiker hylles ? mener det er bedre med flere kul |           | 2       | 0.0%    |

# r7pad14\_headlinesRan\_5: Tilfeldig valgt artikkeloverskrift nr. 5. Bakgrunnsvariabel til konjunksjonseksperiment R7PAD14.

| Verdi                                                               | Merkelapp | Enheter | Prosent |
|---------------------------------------------------------------------|-----------|---------|---------|
| Frp-politiker<br>hylles ? mener<br>det er bedre med<br>færre kul    |           | 2       | 0.0%    |
| Frp-politiker<br>lovpriser etter<br>Facebook-<br>innlegg: «vi tre   |           | 3       | 0.1%    |
| Frp-politiker<br>lovpriser etter<br>homovennlig<br>lovforslag       |           | 4       | 0.1%    |
| Frp-politiker<br>lovpriser: mener<br>det ikke burde<br>være vans    |           | 2       | 0.0%    |
| Frp-politiker<br>med Facebook-<br>innlegg: «vi<br>trenger flere m   |           | 5       | 0.1%    |
| Frp-politiker<br>med forslag<br>som vil øke<br>inntektsforskjell    |           | 1       | 0.0%    |
| Frp-<br>politiker med<br>homovennlig<br>lovforslag                  |           | 4       | 0.1%    |
| Frp-politiker<br>mener alle<br>offentlige<br>aktiviteter ikke<br>ka |           | 3       | 0.1%    |
| Frp-politiker<br>mener alle<br>offentlige<br>aktiviteter kan<br>gjø |           | 4       | 0.1%    |
| Frp-politiker<br>mener det<br>burde være<br>vanskeligere for<br>hom |           | 3       | 0.1%    |
| Frp-politiker<br>mener det er<br>bedre med flere<br>kulturer og     |           | 5       | 0.1%    |
| Frp-politiker<br>mener det ikke<br>burde være<br>vanskeligere fo    |           | 1       | 0.0%    |
| Frp-politiker<br>mener<br>flyktninger bør<br>ha samme rett til<br>s |           | 5       | 0.1%    |
| Frp-politiker<br>mener<br>flyktninger ikke                          |           | 4       | 0.1%    |

# r7pad14\_headlinesRan\_5: Tilfeldig valgt artikkeloverskrift nr. 5. Bakgrunnsvariabel til konjunksjonseksperiment R7PAD14.

| Verdi                                                   | Merkelapp | Enheter | Prosent |
|---------------------------------------------------------|-----------|---------|---------|
| bør ha samme rett                                       |           |         |         |
| Frp-politiker møter massiv motstand - vil ikke åpne fle |           | 2       | 0.0%    |
| Frp-politiker møter massiv motstand - vil åpne flere ol |           | 1       | 0.0%    |
| Frp-politiker presenterer forslag: vil nekte privatiser |           | 1       | 0.0%    |
| Frp-politiker presenterer forslag: vil privatisere NSB  |           | 2       | 0.0%    |
| Frp-politiker på Facebook: «Homofile par MÅ IKKE få lik |           | 2       | 0.0%    |
| Frp-politiker skjelles ut ? mener det er bedre med fler |           | 1       | 0.0%    |
| Frp-politiker vil åpne flere oljefelt i nord            |           | 3       | 0.1%    |
| Frp-profil blir hedret etter twittermelding ? vil steng |           | 1       | 0.0%    |
| Frp-profil blir hedret etter twittermelding ? vil åpne  |           | 1       | 0.0%    |
| Frp-profil blir latterligjort etter twittermelding ? vi |           | 10      | 0.2%    |
| Frp-profil i åpent brev: «jeg vil IKKE at flyktinger sk |           | 6       | 0.1%    |
| Frp-profil i åpent brev: «jeg vil at flyktinger skal få |           | 9       | 0.2%    |
| Frp-profil lanserer forslag om flere privatskoler i Nor |           | 1       | 0.0%    |
| Frp-profil lanserer forslag om færre privatskoler i Nor |           | 3       | 0.1%    |

# r7pad14\_headlinesRan\_5: Tilfeldig valgt artikkeloverskrift nr. 5. Bakgrunnsvariabel til konjunksjonseksperiment R7PAD14.

| Verdi                                                   | Merkelapp | Enheter | Prosent |
|---------------------------------------------------------|-----------|---------|---------|
| Frp-profil mener at kommersielle skoler bør tillates    |           | 2       | 0.0%    |
| Frp-profil møter begeistring - mener at kommersielle sk |           | 6       | 0.1%    |
| Frp-profil møter begeistring for forslag om flere priva |           | 5       | 0.1%    |
| Frp-profil møter proteststorm - mener at kommersielle s |           | 7       | 0.1%    |
| Frp-profil møter proteststorm for forslag om flere priv |           | 3       | 0.1%    |
| Frp-profil møter proteststorm for forslag om færre priv |           | 2       | 0.0%    |
| Frp-profil på twitter: vil stenge for oljeboring i nord |           | 4       | 0.1%    |
| Frp-profil på twitter: vil åpne for oljeboring i nord   |           | 2       | 0.0%    |
| Frp-representant refses ? vil sikre at ingen private sk |           | 1       | 0.0%    |
| Frp-representant refses ? vil åpne for at noen private  |           | 2       | 0.0%    |
| Frp-representant roses ? vil åpne for at noen private s |           | 4       | 0.1%    |
| Frp-representant vil åpne for at noen private skoler sk |           | 3       | 0.1%    |
| Frp-topp kjemper for oljeboring i Lofoten               |           | 2       | 0.0%    |
| Frp-topp kjemper for oljeboring i Lofoten - møter massi |           | 2       | 0.0%    |

# r7pad14\_headlinesRan\_5: Tilfeldig valgt artikkeloverskrift nr. 5. Bakgrunnsvariabel til konjunksjonseksperiment R7PAD14.

| Verdi                                                   | Merkelapp | Enheter | Prosent |
|---------------------------------------------------------|-----------|---------|---------|
| Frp-topp kjemper mot oljeboring i Lofoten               |           | 2       | 0.0%    |
| Frp-topp kjemper mot oljeboring i Lofoten - får massiv  |           | 1       | 0.0%    |
| Frp-topp kjemper mot oljeboring i Lofoten - møter massi |           | 1       | 0.0%    |
| Frp-topp mener at skattenivået burde reduseres          |           | 1       | 0.0%    |
| Frp-topp mener at skattenivået ikke burde reduseres     |           | 1       | 0.0%    |
| Frp-topp presser på for å gi NAV-penger til Syriske fly |           | 4       | 0.1%    |
| Frp-topp truer med å ta NAV-penger fra Syriske flykting |           | 4       | 0.1%    |
| Frp-topp vil gi mer til de rike                         |           | 2       | 0.0%    |
| Frp-topp vil gi mer til de rike - blir refset           |           | 2       | 0.0%    |
| Frp-topp vil gi mer til de rike - blir roset            |           | 1       | 0.0%    |
| Frp-topp vil ta mer fra de rike                         |           | 2       | 0.0%    |
| Frp-topp vil ta mer fra de rike - blir refset           |           | 4       | 0.1%    |
| Frp-topp: Vil avskaffe eiendomsskatten i alle norske by |           | 5       | 0.1%    |
| Frp-topp: Vil innføre eiendomsskatt i alle norske byer. |           | 2       | 0.0%    |
| Helgens konsert                                         |           | 19      | 0.4%    |
| Her er helgens filmer                                   |           | 16      | 0.3%    |
| Her er helgens filmer du bør se                         |           | 10      | 0.2%    |



# r7pad14\_headlinesRan\_5: Tilfeldig valgt artikkeloverskrift nr. 5. Bakgrunnsvariabel til konjunksjonseksperiment R7PAD14.

| Verdi                                                   | Merkelapp | Enheter | Prosent |
|---------------------------------------------------------|-----------|---------|---------|
| Her er helgens filmer du bør unngå                      |           | 18      | 0.4%    |
| Her er vinterens beste smarttelefoner                   |           | 15      | 0.3%    |
| Her er vinterens smarttelefoner                         |           | 14      | 0.3%    |
| Her er vinterens verste smarttelefoner                  |           | 20      | 0.4%    |
| Her går konserten fryktelig galt                        |           | 12      | 0.3%    |
| Her går konserten skikkelig bra                         |           | 15      | 0.3%    |
| Høyre-politiker fordømmes etter Facebook-innlegg: «vi t |           | 4       | 0.1%    |
| Høyre-politiker får kjeft for forslag som vil redusere  |           | 1       | 0.0%    |
| Høyre-politiker får kjeft for forslag som vil øke innte |           | 2       | 0.0%    |
| Høyre-politiker får kritikk etter facebook-status: «Hom |           | 2       | 0.0%    |
| Høyre-politiker får massiv støtte - vil ikke åpne flere |           | 3       | 0.1%    |
| Høyre-politiker får massiv støtte - vil åpne flere olje |           | 1       | 0.0%    |
| Høyre-politiker får pepper for forslag: vil nekte priva |           | 1       | 0.0%    |
| Høyre-politiker får ros etter facebook-status: «Homofil |           | 3       | 0.1%    |
| Høyre-politiker får skryt for forslag som vil redusere  |           | 1       | 0.0%    |
| Høyre-politiker får skryt for forslag som vil øke innte |           | 4       | 0.1%    |

# r7pad14\_headlinesRan\_5: Tilfeldig valgt artikkeloverskrift nr. 5. Bakgrunnsvariabel til konjunksjonseksperiment R7PAD14.

| Verdi                                                   | Merkelapp | Enheter | Prosent |
|---------------------------------------------------------|-----------|---------|---------|
| Høyre-politiker får skryt for forslag: vil nekte privat |           | 2       | 0.0%    |
| Høyre-politiker får skryt for forslag: vil privatisere  |           | 3       | 0.1%    |
| Høyre-politiker hudflettes etter homovennlig lovforslag |           | 2       | 0.0%    |
| Høyre-politiker hudflettes: mener det burde være vanske |           | 3       | 0.1%    |
| Høyre-politiker hudflettes: mener det ikke burde være v |           | 4       | 0.1%    |
| Høyre-politiker hylles ? mener det er bedre med flere k |           | 3       | 0.1%    |
| Høyre-politiker lovprises etter Facebook-innlegg: «vi t |           | 6       | 0.1%    |
| Høyre-politiker lovprises etter homofiendtlig lovforsla |           | 3       | 0.1%    |
| Høyre-politiker lovprises etter homovennlig lovforslag  |           | 4       | 0.1%    |
| Høyre-politiker lovprises: mener det ikke burde være va |           | 1       | 0.0%    |
| Høyre-politiker med Facebook-innlegg: «vi trenger flere |           | 2       | 0.0%    |
| Høyre-politiker med forslag som vil redusere inntektsfo |           | 3       | 0.1%    |
| Høyre-politiker med homovennlig lovforslag              |           | 2       | 0.0%    |
| Høyre-politiker mener alle offentlige aktiviteter ikke  |           | 6       | 0.1%    |
| Høyre-politiker mener alle                              |           | 6       | 0.1%    |

# r7pad14\_headlinesRan\_5: Tilfeldig valgt artikkeloverskrift nr. 5. Bakgrunnsvariabel til konjunksjonseksperiment R7PAD14.

| Verdi                                                   | Merkelapp | Enheter | Prosent |
|---------------------------------------------------------|-----------|---------|---------|
| offentlige aktiviteter kan g                            |           |         |         |
| Høyre-politiker mener det burde være vanskeligere for h |           | 3       | 0.1%    |
| Høyre-politiker mener det er bedre med flere kulturer o |           | 2       | 0.0%    |
| Høyre-politiker mener det er bedre med færre kulturer o |           | 3       | 0.1%    |
| Høyre-politiker mener det ikke burde være vanskeligere  |           | 2       | 0.0%    |
| Høyre-politiker mener flyktninger bør ha samme rett til |           | 8       | 0.2%    |
| Høyre-politiker mener flyktninger ikke bør ha samme ret |           | 4       | 0.1%    |
| Høyre-politiker møter massiv motstand - vil ikke åpne f |           | 1       | 0.0%    |
| Høyre-politiker møter massiv motstand - vil åpne flere  |           | 1       | 0.0%    |
| Høyre-politiker presenterer forslag: vil nekte privatis |           | 2       | 0.0%    |
| Høyre-politiker presenterer forslag: vil privatisere NS |           | 5       | 0.1%    |
| Høyre-politiker på Facebook: «Homofile par MÅ IKKE få l |           | 3       | 0.1%    |
| Høyre-politiker på Facebook: «Homofile par MÅ få like r |           | 1       | 0.0%    |
| Høyre-politiker skjelles ut ? mener det er bedre med fl |           | 2       | 0.0%    |
| Høyre-politiker skjelles ut ?                           |           | 1       | 0.0%    |

# r7pad14\_headlinesRan\_5: Tilfeldig valgt artikkeloverskrift nr. 5. Bakgrunnsvariabel til konjunksjonseksperiment R7PAD14.

| Verdi                                                   | Merkelapp | Enheter | Prosent |
|---------------------------------------------------------|-----------|---------|---------|
| mener det er bedre med fæ                               |           |         |         |
| Høyre-politiker vil ikke åpne flere oljefelt i nord     |           | 1       | 0.0%    |
| Høyre-politiker vil åpne flere oljefelt i nord          |           | 5       | 0.1%    |
| Høyre-profil blir hedret etter twittermelding ? vil åpn |           | 3       | 0.1%    |
| Høyre-profil blir latterliggjort etter twittermelding ? |           | 5       | 0.1%    |
| Høyre-profil i åpent brev: «jeg vil IKKE at flyktinger  |           | 3       | 0.1%    |
| Høyre-profil i åpent brev: «jeg vil at flyktinger skal  |           | 13      | 0.3%    |
| Høyre-profil lanserer forslag om flere privatskoler i N |           | 5       | 0.1%    |
| Høyre-profil lanserer forslag om færre privatskoler i N |           | 1       | 0.0%    |
| Høyre-profil mener at kommersielle skoler bør forbys    |           | 4       | 0.1%    |
| Høyre-profil mener at kommersielle skoler bør tillates  |           | 4       | 0.1%    |
| Høyre-profil møter begeistring - mener at kommersielle  |           | 5       | 0.1%    |
| Høyre-profil møter begeistring for forslag om flere pri |           | 2       | 0.0%    |
| Høyre-profil møter begeistring for forslag om færre pri |           | 5       | 0.1%    |
| Høyre-profil møter proteststorm                         |           | 4       | 0.1%    |

# r7pad14\_headlinesRan\_5: Tilfeldig valgt artikkeloverskrift nr. 5. Bakgrunnsvariabel til konjunksjonseksperiment R7PAD14.

| Verdi                                                   | Merkelapp | Enheter | Prosent |
|---------------------------------------------------------|-----------|---------|---------|
| - mener at kommersielle                                 |           |         |         |
| Høyre-profil møter proteststorm for forslag om flere pr |           | 1       | 0.0%    |
| Høyre-profil møter proteststorm for forslag om færre pr |           | 2       | 0.0%    |
| Høyre-profil på twitter: vil åpne for oljeboring i nord |           | 1       | 0.0%    |
| Høyre-representant refses ? vil sikre at ingen private  |           | 2       | 0.0%    |
| Høyre-representant refses ? vil åpne for at noen privat |           | 3       | 0.1%    |
| Høyre-representant roses ? vil sikre at ingen private s |           | 1       | 0.0%    |
| Høyre-representant roses ? vil åpne for at noen private |           | 2       | 0.0%    |
| Høyre-representant vil sikre at ingen private skoler sk |           | 2       | 0.0%    |
| Høyre-representant vil åpne for at noen private skoler  |           | 3       | 0.1%    |
| Høyre-topp kjemper for oljeboring i Lofoten             |           | 3       | 0.1%    |
| Høyre-topp kjemper for oljeboring i Lofoten - får massi |           | 1       | 0.0%    |
| Høyre-topp kjemper for oljeboring i Lofoten - møter mas |           | 2       | 0.0%    |
| Høyre-topp kjemper mot oljeboring i Lofoten             |           | 6       | 0.1%    |

# r7pad14\_headlinesRan\_5: Tilfeldig valgt artikkeloverskrift nr. 5. Bakgrunnsvariabel til konjunksjonseksperiment R7PAD14.

| Verdi                                                               | Merkelapp | Enheter | Prosent |
|---------------------------------------------------------------------|-----------|---------|---------|
| Høyre-topp<br>kjemper mot<br>oljeboring i<br>Lofoten - får<br>massi |           | 1       | 0.0%    |
| Høyre-topp<br>kjemper mot<br>oljeboring i<br>Lofoten - møter<br>mas |           | 2       | 0.0%    |
| Høyre-topp<br>mener at<br>skattenivået<br>burde reduseres           |           | 2       | 0.0%    |
| Høyre-topp<br>mener at<br>skattenivået ikke<br>burde reduseres      |           | 1       | 0.0%    |
| Høyre-topp<br>presser på for å<br>gi NAV-penger<br>til Syriske f    |           | 3       | 0.1%    |
| Høyre-topp<br>truer med å ta<br>NAV-penger fra<br>Syriske flykti    |           | 5       | 0.1%    |
| Høyre-topp vil<br>gi mer til de rike                                |           | 2       | 0.0%    |
| Høyre-topp vil<br>gi mer til de rike<br>- blir roset                |           | 4       | 0.1%    |
| Høyre-topp vil ta<br>mer fra de rike                                |           | 4       | 0.1%    |
| Høyre-topp vil ta<br>mer fra de rike -<br>blir refset               |           | 3       | 0.1%    |
| Høyre-topp vil ta<br>mer fra de rike -<br>blir roset                |           | 5       | 0.1%    |
| Høyre-topp:<br>Vil avskaffe<br>eiendomsskatten<br>i alle norske     |           | 2       | 0.0%    |
| Jubler for<br>Ap-topp:<br>Vil avskaffe<br>eiendomsskatten<br>i alle |           | 1       | 0.0%    |
| Jubler for Ap-<br>topp: Vil innføre<br>eiendomsskatt i<br>alle no   |           | 3       | 0.1%    |
| Jubler for<br>Frp-topp:<br>Vil avskaffe<br>eiendomsskatten<br>i all |           | 5       | 0.1%    |

# r7pad14\_headlinesRan\_5: Tilfeldig valgt artikkeloverskrift nr. 5. Bakgrunnsvariabel til konjunksjonseksperiment R7PAD14.

| Verdi                                                   | Merkelapp | Enheter | Prosent |
|---------------------------------------------------------|-----------|---------|---------|
| Jubler for Frp-topp: Vil innføre eiendomsskatt i alle n |           | 2       | 0.0%    |
| Jubler for Høyre-topp: Vil avskaffe eiendomsskatten i a |           | 1       | 0.0%    |
| Jubler for Høyre-topp: Vil innføre eiendomsskatt i alle |           | 3       | 0.1%    |
| Jubler for Krf-topp: Vil avskaffe eiendomsskatten i all |           | 1       | 0.0%    |
| Jubler for Mdg-topp: Vil innføre eiendomsskatt i alle n |           | 3       | 0.1%    |
| Jubler for Rødt-topp: Vil avskaffe eiendomsskatten i al |           | 2       | 0.0%    |
| Jubler for Rødt-topp: Vil innføre eiendomsskatt i alle  |           | 4       | 0.1%    |
| Jubler for Sp-topp: Vil innføre eiendomsskatt i alle no |           | 1       | 0.0%    |
| Jubler for Sv-topp: Vil avskaffe eiendomsskatten i alle |           | 1       | 0.0%    |
| Jubler for Sv-topp: Vil innføre eiendomsskatt i alle no |           | 1       | 0.0%    |
| Jubler for Venstre-topp: Vil avskaffe eiendomsskatten i |           | 2       | 0.0%    |
| Kjendisfesten ble holdt i går                           |           | 23      | 0.5%    |
| Kjendisfesten gikk skikkelig galt                       |           | 13      | 0.3%    |
| Kjendisfesten var en stor suksess                       |           | 17      | 0.4%    |

# r7pad14\_headlinesRan\_5: Tilfeldig valgt artikkeloverskrift nr. 5. Bakgrunnsvariabel til konjunksjonseksperiment R7PAD14.

| Verdi                                                    | Merkelapp | Enheter | Prosent |
|----------------------------------------------------------|-----------|---------|---------|
| Krf-politiker fordømmes etter Facebook-innlegg: «vi tre  |           | 2       | 0.0%    |
| Krf-politiker får kjeft for forslag som vil redusere in  |           | 1       | 0.0%    |
| Krf-politiker får kritikk etter facebook-status: «Homof  |           | 3       | 0.1%    |
| Krf-politiker får massiv støtte - vil ikke åpne flere o  |           | 1       | 0.0%    |
| Krf-politiker får massiv støtte - vil åpne flere oljefe  |           | 3       | 0.1%    |
| Krf-politiker får pepper for forslag: vil privatisere N  |           | 1       | 0.0%    |
| Krf-politiker får ros etter facebook-status: «Homofile   |           | 6       | 0.1%    |
| Krf-politiker får skryt for forslag som vil redusere in  |           | 2       | 0.0%    |
| Krf-politiker får skryt for forslag som vil øke inntekt  |           | 3       | 0.1%    |
| Krf-politiker får skryt for forslag: vil privatisere NS  |           | 1       | 0.0%    |
| Krf-politiker hudflettes etter homofiendtlig lovforslag  |           | 2       | 0.0%    |
| Krf-politiker hudflettes etter homovennlig lovforslag    |           | 3       | 0.1%    |
| Krf-politiker hudflettes: mener det burde være vanskelig |           | 3       | 0.1%    |
| Krf-politiker hudflettes: mener det ikke burde være van  |           | 1       | 0.0%    |
| Krf-politiker hylles ? mener                             |           | 1       | 0.0%    |



# r7pad14\_headlinesRan\_5: Tilfeldig valgt artikkeloverskrift nr. 5. Bakgrunnsvariabel til konjunksjonseksperiment R7PAD14.

| Verdi                                                   | Merkelapp | Enheter | Prosent |
|---------------------------------------------------------|-----------|---------|---------|
| det er bedre med flere kul                              |           |         |         |
| Krf-politiker hylles ? mener det er bedre med færre kul |           | 1       | 0.0%    |
| Krf-politiker lovprises etter Facebook-innlegg: «vi tre |           | 4       | 0.1%    |
| Krf-politiker lovprises etter homofiendtlig lovforslag  |           | 1       | 0.0%    |
| Krf-politiker lovprises etter homovenlig lovforslag     |           | 1       | 0.0%    |
| Krf-politiker lovprises: mener det burde være vanskelig |           | 1       | 0.0%    |
| Krf-politiker lovprises: mener det ikke burde være vans |           | 4       | 0.1%    |
| Krf-politiker med Facebook-innlegg: «vi trenger flere m |           | 1       | 0.0%    |
| Krf-politiker med Facebook-innlegg: «vi trenger ikke fl |           | 1       | 0.0%    |
| Krf-politiker med forslag som vil øke inntektsforskjell |           | 4       | 0.1%    |
| Krf-politiker med homofiendtlig lovforslag              |           | 2       | 0.0%    |
| Krf-politiker med homovenlig lovforslag                 |           | 1       | 0.0%    |
| Krf-politiker mener alle offentlige aktiviteter ikke ka |           | 4       | 0.1%    |
| Krf-politiker mener alle offentlige aktiviteter kan gjø |           | 4       | 0.1%    |
| Krf-politiker mener det er                              |           | 3       | 0.1%    |

# r7pad14\_headlinesRan\_5: Tilfeldig valgt artikkeloverskrift nr. 5. Bakgrunnsvariabel til konjunksjonseksperiment R7PAD14.

| Verdi                                                   | Merkelapp | Enheter | Prosent |
|---------------------------------------------------------|-----------|---------|---------|
| bedre med flere kulturer og                             |           |         |         |
| Krf-politiker mener det er bedre med færre kulturer og  |           | 2       | 0.0%    |
| Krf-politiker mener flyktninger bør ha samme rett til s |           | 7       | 0.1%    |
| Krf-politiker mener flyktninger ikke bør ha samme rett  |           | 4       | 0.1%    |
| Krf-politiker møter massiv motstand - vil ikke åpne fle |           | 1       | 0.0%    |
| Krf-politiker møter massiv motstand - vil åpne flere ol |           | 2       | 0.0%    |
| Krf-politiker presenterer forslag: vil nekte privatiser |           | 3       | 0.1%    |
| Krf-politiker presenterer forslag: vil privatisere NSB  |           | 1       | 0.0%    |
| Krf-politiker på Facebook: «Homofile par MÅ IKKE få lik |           | 1       | 0.0%    |
| Krf-politiker på Facebook: «Homofile par MÅ få like ret |           | 3       | 0.1%    |
| Krf-politiker skjelles ut ? mener det er bedre med fler |           | 4       | 0.1%    |
| Krf-politiker skjelles ut ? mener det er bedre med fær  |           | 1       | 0.0%    |
| Krf-politiker vil ikke åpne flere oljefelt i nord       |           | 2       | 0.0%    |
| Krf-politiker vil åpne flere oljefelt i nord            |           | 2       | 0.0%    |
| Krf-profil blir hedret etter twittermelding ? vil steng |           | 1       | 0.0%    |

# r7pad14\_headlinesRan\_5: Tilfeldig valgt artikkeloverskrift nr. 5. Bakgrunnsvariabel til konjunksjonseksperiment R7PAD14.

| Verdi                                                   | Merkelapp | Enheter | Prosent |
|---------------------------------------------------------|-----------|---------|---------|
| Krf-profil blir hedret etter twittermelding ? vil åpne  |           | 4       | 0.1%    |
| Krf-profil blir latterligjort etter twittermelding ? vi |           | 4       | 0.1%    |
| Krf-profil i åpent brev: «jeg vil IKKE at flyktinger sk |           | 3       | 0.1%    |
| Krf-profil i åpent brev: «jeg vil at flyktinger skal få |           | 7       | 0.1%    |
| Krf-profil lanserer forslag om flere privatskoler i Nor |           | 1       | 0.0%    |
| Krf-profil lanserer forslag om færre privatskoler i Nor |           | 2       | 0.0%    |
| Krf-profil mener at kommersielle skoler bør forbys      |           | 1       | 0.0%    |
| Krf-profil mener at kommersielle skoler bør tillates    |           | 2       | 0.0%    |
| Krf-profil møter begeistring for forslag om flere priva |           | 2       | 0.0%    |
| Krf-profil møter begeistring for forslag om færre priva |           | 4       | 0.1%    |
| Krf-profil møter proteststorm - mener at kommersielle s |           | 6       | 0.1%    |
| Krf-profil møter proteststorm for forslag om flere priv |           | 1       | 0.0%    |
| Krf-profil møter proteststorm for forslag om færre priv |           | 1       | 0.0%    |
| Krf-profil på twitter: vil åpne for oljeboring i nord   |           | 1       | 0.0%    |
| Krf-representant refses ? vil sikre                     |           | 3       | 0.1%    |

# r7pad14\_headlinesRan\_5: Tilfeldig valgt artikkeloverskrift nr. 5. Bakgrunnsvariabel til konjunksjonseksperiment R7PAD14.

| Verdi                                                   | Merkelapp | Enheter | Prosent |
|---------------------------------------------------------|-----------|---------|---------|
| at ingen private sk                                     |           |         |         |
| Krf-representant refses ? vil åpne for at noen private  |           | 4       | 0.1%    |
| Krf-representant roses ? vil åpne for at noen private s |           | 1       | 0.0%    |
| Krf-representant vil åpne for at noen private skoler sk |           | 2       | 0.0%    |
| Krf-topp kjemper for oljeboring i Lofoten - får massiv  |           | 2       | 0.0%    |
| Krf-topp kjemper for oljeboring i Lofoten - møter massi |           | 2       | 0.0%    |
| Krf-topp kjemper mot oljeboring i Lofoten               |           | 3       | 0.1%    |
| Krf-topp kjemper mot oljeboring i Lofoten - møter massi |           | 3       | 0.1%    |
| Krf-topp mener at skattenivået burde reduseres          |           | 2       | 0.0%    |
| Krf-topp mener at skattenivået ikke burde reduseres     |           | 3       | 0.1%    |
| Krf-topp presser på for å gi NAV-penger til Syriske fly |           | 9       | 0.2%    |
| Krf-topp truer med å ta NAV-penger fra Syriske flykting |           | 11      | 0.2%    |
| Krf-topp vil gi mer til de rike                         |           | 1       | 0.0%    |
| Krf-topp vil gi mer til de rike - blir refset           |           | 1       | 0.0%    |
| Krf-topp vil gi mer til de rike - blir roset            |           | 3       | 0.1%    |

# r7pad14\_headlinesRan\_5: Tilfeldig valgt artikkeloverskrift nr. 5. Bakgrunnsvariabel til konjunksjonseksperiment R7PAD14.

| Verdi                                                   | Merkelapp | Enheter | Prosent |
|---------------------------------------------------------|-----------|---------|---------|
| Krf-topp vil ta mer fra de rike - blir refset           |           | 1       | 0.0%    |
| Krf-topp vil ta mer fra de rike - blir roset            |           | 4       | 0.1%    |
| Krf-topp: Vil avskaffe eiendomsskatten i alle norske by |           | 2       | 0.0%    |
| Krf-topp: Vil innføre eiendomsskatt i alle norske byer. |           | 1       | 0.0%    |
| Lokal Ap-politiker ? vil hindre at vi tar imot 5000 nye |           | 3       | 0.1%    |
| Lokal Ap-politiker hylles ? vil hindre at vi tar imot 5 |           | 1       | 0.0%    |
| Lokal Ap-politiker hylles ? vil ta imot 5000 nye flyktn |           | 1       | 0.0%    |
| Lokal Ap-politiker skjelles ut ? vil hindre at vi tar i |           | 5       | 0.1%    |
| Lokal Ap-politiker skjelles ut ? vil ta imot 5000 nye f |           | 1       | 0.0%    |
| Lokal Frp-politiker ? vil hindre at vi tar imot 5000 ny |           | 3       | 0.1%    |
| Lokal Frp-politiker ? vil ta imot 5000 nye flyktninger  |           | 2       | 0.0%    |
| Lokal Frp-politiker hylles ? vil hindre at vi tar imot  |           | 2       | 0.0%    |
| Lokal Frp-politiker hylles ? vil ta imot 5000 nye flykt |           | 2       | 0.0%    |
| Lokal Frp-politiker skjelles ut ? vil hindre at vi tar  |           | 3       | 0.1%    |
| Lokal Frp-politiker skjelles ut ? vil ta imot 5000 nye  |           | 3       | 0.1%    |

# r7pad14\_headlinesRan\_5: Tilfeldig valgt artikkeloverskrift nr. 5. Bakgrunnsvariabel til konjunksjonseksperiment R7PAD14.

| Verdi                                                   | Merkelapp | Enheter | Prosent |
|---------------------------------------------------------|-----------|---------|---------|
| Lokal Høyre-politiker ? vil ta imot 5000 nye flyktninge |           | 1       | 0.0%    |
| Lokal Høyre-politiker hylles ? vil hindre at vi tar imo |           | 1       | 0.0%    |
| Lokal Høyre-politiker hylles ? vil ta imot 5000 nye fly |           | 3       | 0.1%    |
| Lokal Høyre-politiker skjelles ut ? vil hindre at vi ta |           | 3       | 0.1%    |
| Lokal Høyre-politiker skjelles ut ? vil ta imot 5000 ny |           | 4       | 0.1%    |
| Lokal Krf-politiker ? vil hindre at vi tar imot 5000 ny |           | 2       | 0.0%    |
| Lokal Krf-politiker ? vil ta imot 5000 nye flyktninger  |           | 1       | 0.0%    |
| Lokal Krf-politiker hylles ? vil hindre at vi tar imot  |           | 3       | 0.1%    |
| Lokal Krf-politiker skjelles ut ? vil ta imot 5000 nye  |           | 1       | 0.0%    |
| Lokal Mdg-politiker ? vil hindre at vi tar imot 5000 ny |           | 2       | 0.0%    |
| Lokal Mdg-politiker ? vil ta imot 5000 nye flyktninger  |           | 3       | 0.1%    |
| Lokal Mdg-politiker hylles ? vil hindre at vi tar imot  |           | 2       | 0.0%    |
| Lokal Mdg-politiker hylles ? vil ta imot 5000 nye flykt |           | 1       | 0.0%    |
| Lokal Mdg-politiker skjelles ut ? vil hindre at vi tar  |           | 1       | 0.0%    |
| Lokal Mdg-politiker skjelles                            |           | 1       | 0.0%    |

# r7pad14\_headlinesRan\_5: Tilfeldig valgt artikkeloverskrift nr. 5. Bakgrunnsvariabel til konjunksjonseksperiment R7PAD14.

| Verdi                                                   | Merkelapp | Enheter | Prosent |
|---------------------------------------------------------|-----------|---------|---------|
| ut ? vil ta imot 5000 nye                               |           |         |         |
| Lokal Rødt-politiker ? vil hindre at vi tar imot 5000 n |           | 2       | 0.0%    |
| Lokal Rødt-politiker ? vil ta imot 5000 nye flyktninger |           | 3       | 0.1%    |
| Lokal Rødt-politiker hylles ? vil ta imot 5000 nye flyk |           | 2       | 0.0%    |
| Lokal Rødt-politiker skjelles ut ? vil ta imot 5000 nye |           | 3       | 0.1%    |
| Lokal Sp-politiker ? vil hindre at vi tar imot 5000 nye |           | 1       | 0.0%    |
| Lokal Sp-politiker ? vil ta imot 5000 nye flyktninger   |           | 3       | 0.1%    |
| Lokal Sp-politiker hylles ? vil hindre at vi tar imot 5 |           | 1       | 0.0%    |
| Lokal Sp-politiker hylles ? vil ta imot 5000 nye flyktn |           | 5       | 0.1%    |
| Lokal Sp-politiker skjelles ut ? vil hindre at vi tar i |           | 2       | 0.0%    |
| Lokal Sp-politiker skjelles ut ? vil ta imot 5000 nye f |           | 1       | 0.0%    |
| Lokal Sv-politiker ? vil hindre at vi tar imot 5000 nye |           | 3       | 0.1%    |
| Lokal Sv-politiker ? vil ta imot 5000 nye flyktninger   |           | 4       | 0.1%    |
| Lokal Sv-politiker hylles ? vil hindre at vi tar imot 5 |           | 1       | 0.0%    |
| Lokal Sv-politiker hylles ? vil ta imot 5000 nye flyktn |           | 2       | 0.0%    |

# r7pad14\_headlinesRan\_5: Tilfeldig valgt artikkeloverskrift nr. 5. Bakgrunnsvariabel til konjunksjonseksperiment R7PAD14.

| Verdi                                                    | Merkelapp | Enheter | Prosent |
|----------------------------------------------------------|-----------|---------|---------|
| Lokal Sv-politiker skjelles ut ? vil hindre at vi tar i  |           | 2       | 0.0%    |
| Lokal Venstre-politiker ? vil hindre at vi tar imot 500  |           | 2       | 0.0%    |
| Lokal Venstre-politiker ? vil ta imot 5000 nye flyktning |           | 3       | 0.1%    |
| Lokal Venstre-politiker hylles ? vil hindre at vi tar i  |           | 4       | 0.1%    |
| Lokal Venstre-politiker skjelles ut ? vil hindre at vi   |           | 3       | 0.1%    |
| Lokal Venstre-politiker skjelles ut ? vil ta imot 5000   |           | 3       | 0.1%    |
| Mareritthistoriene om høstens treningstrend              |           | 13      | 0.3%    |
| Mdg-politiker fordømmes etter Facebook-innlegg: «vi tre  |           | 6       | 0.1%    |
| Mdg-politiker får kjeft for forslag som vil redusere in  |           | 3       | 0.1%    |
| Mdg-politiker får kjeft for forslag som vil øke inntekt  |           | 2       | 0.0%    |
| Mdg-politiker får kritikk etter facebook-status: «Homof  |           | 4       | 0.1%    |
| Mdg-politiker får massiv støtte - vil åpne flere oljefe  |           | 5       | 0.1%    |
| Mdg-politiker får pepper for forslag: vil privatisere N  |           | 1       | 0.0%    |
| Mdg-politiker får ros etter facebook-status: «Homofile   |           | 1       | 0.0%    |
| Mdg-politiker får skryt for                              |           | 3       | 0.1%    |



# r7pad14\_headlinesRan\_5: Tilfeldig valgt artikkeloverskrift nr. 5. Bakgrunnsvariabel til konjunksjonseksperiment R7PAD14.

| Verdi                                                    | Merkelapp | Enheter | Prosent |
|----------------------------------------------------------|-----------|---------|---------|
| forslag: vil privatisere NS                              |           |         |         |
| Mdg-politiker hudflettes etter homofiendtlig lovforslag  |           | 1       | 0.0%    |
| Mdg-politiker hudflettes etter homovennlig lovforslag    |           | 4       | 0.1%    |
| Mdg-politiker hudflettes: mener det burde være vanskelig |           | 1       | 0.0%    |
| Mdg-politiker hudflettes: mener det ikke burde være van  |           | 1       | 0.0%    |
| Mdg-politiker hylles ? mener det er bedre med flere kul  |           | 2       | 0.0%    |
| Mdg-politiker hylles ? mener det er bedre med færre kul  |           | 3       | 0.1%    |
| Mdg-politiker lovprises etter Facebook-innlegg: «vi tre  |           | 1       | 0.0%    |
| Mdg-politiker lovprises etter homofiendtlig lovforslag   |           | 1       | 0.0%    |
| Mdg-politiker lovprises: mener det burde være vanskelig  |           | 1       | 0.0%    |
| Mdg-politiker lovprises: mener det ikke burde være vans  |           | 3       | 0.1%    |
| Mdg-politiker med Facebook-innlegg: «vi trenger flere m  |           | 2       | 0.0%    |
| Mdg-politiker med homofiendtlig lovforslag               |           | 1       | 0.0%    |
| Mdg-politiker med homovennlig lovforslag                 |           | 2       | 0.0%    |
| Mdg-politiker mener alle offentlige                      |           | 3       | 0.1%    |

# r7pad14\_headlinesRan\_5: Tilfeldig valgt artikkeloverskrift nr. 5. Bakgrunnsvariabel til konjunksjonseksperiment R7PAD14.

| Verdi                                                    | Merkelapp | Enheter | Prosent |
|----------------------------------------------------------|-----------|---------|---------|
| aktiviteter ikke ka                                      |           |         |         |
| Mdg-politiker mener alle offentlige aktiviteter kan gjø  |           | 5       | 0.1%    |
| Mdg-politiker mener det burde være vanskeligere for hom  |           | 5       | 0.1%    |
| Mdg-politiker mener det er bedre med flere kulturer og   |           | 3       | 0.1%    |
| Mdg-politiker mener det er bedre med færre kulturer og   |           | 3       | 0.1%    |
| Mdg-politiker mener flyktninger bør ha samme rett til s  |           | 3       | 0.1%    |
| Mdg-politiker mener flyktninger ikke bør ha samme rett   |           | 9       | 0.2%    |
| Mdg-politiker møter massiv motstand - vil ikke åpne fle  |           | 2       | 0.0%    |
| Mdg-politiker møter massiv motstand - vil åpne flere ol  |           | 2       | 0.0%    |
| Mdg-politiker presenterer forslag: vil nekte privatiser  |           | 1       | 0.0%    |
| Mdg-politiker på Facebook: «Homofile par MÅ IKKE få lik  |           | 2       | 0.0%    |
| Mdg-politiker skjelles ut ? mener det er bedre med fler  |           | 2       | 0.0%    |
| Mdg-politiker skjelles ut ? mener det er bedre med færre |           | 1       | 0.0%    |
| Mdg-politiker vil ikke åpne flere oljefelt i nord        |           | 2       | 0.0%    |
| Mdg-profil blir hedret etter                             |           | 1       | 0.0%    |

# r7pad14\_headlinesRan\_5: Tilfeldig valgt artikkeloverskrift nr. 5. Bakgrunnsvariabel til konjunksjonseksperiment R7PAD14.

| Verdi                                                    | Merkelapp | Enheter | Prosent |
|----------------------------------------------------------|-----------|---------|---------|
| twittermelding ? vil steng                               |           |         |         |
| Mdg-profil blir hedret etter twittermelding ? vil åpne   |           | 3       | 0.1%    |
| Mdg-profil blir latterliggjort etter twittermelding ? vi |           | 7       | 0.1%    |
| Mdg-profil i åpent brev: «jeg vil IKKE at flyktinger sk  |           | 8       | 0.2%    |
| Mdg-profil i åpent brev: «jeg vil at flyktinger skal få  |           | 6       | 0.1%    |
| Mdg-profil lanserer forslag om flere privatskoler i Nor  |           | 1       | 0.0%    |
| Mdg-profil lanserer forslag om færre privatskoler i Nor  |           | 3       | 0.1%    |
| Mdg-profil mener at kommersielle skoler bør tillates     |           | 1       | 0.0%    |
| Mdg-profil møter begeistring - mener at kommersielle sk  |           | 2       | 0.0%    |
| Mdg-profil møter begeistring for forslag om flere priva  |           | 1       | 0.0%    |
| Mdg-profil møter begeistring for forslag om færre priva  |           | 3       | 0.1%    |
| Mdg-profil møter proteststorm - mener at kommersielle s  |           | 6       | 0.1%    |
| Mdg-profil møter proteststorm for forslag om flere priv  |           | 3       | 0.1%    |

# r7pad14\_headlinesRan\_5: Tilfeldig valgt artikkeloverskrift nr. 5. Bakgrunnsvariabel til konjunksjonseksperiment R7PAD14.

| Verdi                                                   | Merkelapp | Enheter | Prosent |
|---------------------------------------------------------|-----------|---------|---------|
| Mdg-profil møter proteststorm for forslag om færre priv |           | 5       | 0.1%    |
| Mdg-profil på twitter: vil stenge for oljeboring i nord |           | 1       | 0.0%    |
| Mdg-profil på twitter: vil åpne for oljeboring i nord   |           | 1       | 0.0%    |
| Mdg-representant refses ? vil sikre at ingen private sk |           | 2       | 0.0%    |
| Mdg-representant refses ? vil åpne for at noen private  |           | 1       | 0.0%    |
| Mdg-representant roses ? vil sikre at ingen private sko |           | 1       | 0.0%    |
| Mdg-representant roses ? vil åpne for at noen private s |           | 4       | 0.1%    |
| Mdg-representant vil sikre at ingen private skoler skal |           | 2       | 0.0%    |
| Mdg-representant vil åpne for at noen private skoler sk |           | 2       | 0.0%    |
| Mdg-topp kjemper for oljeboring i Lofoten               |           | 1       | 0.0%    |
| Mdg-topp kjemper for oljeboring i Lofoten - får massiv  |           | 2       | 0.0%    |
| Mdg-topp kjemper for oljeboring i Lofoten - møter massi |           | 2       | 0.0%    |
| Mdg-topp kjemper mot                                    |           | 2       | 0.0%    |

# r7pad14\_headlinesRan\_5: Tilfeldig valgt artikkeloverskrift nr. 5. Bakgrunnsvariabel til konjunksjonseksperiment R7PAD14.

| Verdi                                                   | Merkelapp | Enheter | Prosent |
|---------------------------------------------------------|-----------|---------|---------|
| oljeboring i Lofoten                                    |           |         |         |
| Mdg-topp kjemper mot oljeboring i Lofoten - får massiv  |           | 1       | 0.0%    |
| Mdg-topp kjemper mot oljeboring i Lofoten - møter massi |           | 4       | 0.1%    |
| Mdg-topp mener at skattenivået burde reduseres          |           | 1       | 0.0%    |
| Mdg-topp mener at skattenivået ikke burde reduseres     |           | 3       | 0.1%    |
| Mdg-topp presser på for å gi NAV-penger til Syriske fly |           | 6       | 0.1%    |
| Mdg-topp truer med å ta NAV-penger fra Syriske flykting |           | 9       | 0.2%    |
| Mdg-topp vil gi mer til de rike                         |           | 3       | 0.1%    |
| Mdg-topp vil gi mer til de rike - blir refset           |           | 3       | 0.1%    |
| Mdg-topp vil gi mer til de rike - blir roset            |           | 4       | 0.1%    |
| Mdg-topp vil ta mer fra de rike                         |           | 2       | 0.0%    |
| Mdg-topp vil ta mer fra de rike - blir refset           |           | 1       | 0.0%    |
| Mdg-topp vil ta mer fra de rike - blir roset            |           | 1       | 0.0%    |
| Mdg-topp: Vil avskaffe eiendomsskatten i alle norske by |           | 3       | 0.1%    |
| Norges store sangstjerne får refs i fersk anmeldelse    |           | 11      | 0.2%    |
| Norges store sangstjerne får ros i fersk anmeldelse     |           | 13      | 0.3%    |

# r7pad14\_headlinesRan\_5: Tilfeldig valgt artikkeloverskrift nr. 5. Bakgrunnsvariabel til konjunksjonseksperiment R7PAD14.

| Verdi                                                   | Merkelapp | Enheter | Prosent |
|---------------------------------------------------------|-----------|---------|---------|
| Norges store sangstjerne i fersk anmeldelse             |           | 13      | 0.3%    |
| Politiker fra Ap vil senke formueskatten                |           | 1       | 0.0%    |
| Politiker fra Ap vil senke formueskatten, blir roset    |           | 2       | 0.0%    |
| Politiker fra Ap vil senke formueskatten, mottar sterk  |           | 4       | 0.1%    |
| Politiker fra Ap vil øke formueskatten                  |           | 3       | 0.1%    |
| Politiker fra Ap vil øke formueskatten, blir roset      |           | 1       | 0.0%    |
| Politiker fra Ap vil øke formueskatten, mottar sterk kr |           | 2       | 0.0%    |
| Politiker fra Frp vil senke formueskatten, blir roset   |           | 3       | 0.1%    |
| Politiker fra Frp vil senke formueskatten, mottar sterk |           | 4       | 0.1%    |
| Politiker fra Frp vil øke formueskatten                 |           | 2       | 0.0%    |
| Politiker fra Frp vil øke formueskatten, blir roset     |           | 5       | 0.1%    |
| Politiker fra Frp vil øke formueskatten, mottar sterk k |           | 1       | 0.0%    |
| Politiker fra Høyre vil senke formueskatten             |           | 1       | 0.0%    |
| Politiker fra Høyre vil senke formueskatten, blir roset |           | 3       | 0.1%    |
| Politiker fra Høyre vil senke formueskatten, mottar ste |           | 3       | 0.1%    |
| Politiker fra Høyre vil øke formueskatten               |           | 3       | 0.1%    |

# r7pad14\_headlinesRan\_5: Tilfeldig valgt artikkeloverskrift nr. 5. Bakgrunnsvariabel til konjunksjonseksperiment R7PAD14.

| Verdi                                                   | Merkelapp | Enheter | Prosent |
|---------------------------------------------------------|-----------|---------|---------|
| Politiker fra Høyre vil øke formueskatten, blir roset   |           | 2       | 0.0%    |
| Politiker fra Høyre vil øke formueskatten, mottar sterk |           | 1       | 0.0%    |
| Politiker fra Krf vil senke formueskatten               |           | 1       | 0.0%    |
| Politiker fra Krf vil senke formueskatten, mottar sterk |           | 5       | 0.1%    |
| Politiker fra Krf vil øke formueskatten                 |           | 4       | 0.1%    |
| Politiker fra Krf vil øke formueskatten, blir roset     |           | 3       | 0.1%    |
| Politiker fra Krf vil øke formueskatten, mottar sterk k |           | 2       | 0.0%    |
| Politiker fra Mdg vil senke formueskatten, blir roset   |           | 1       | 0.0%    |
| Politiker fra Mdg vil senke formueskatten, mottar sterk |           | 2       | 0.0%    |
| Politiker fra Mdg vil øke formueskatten, blir roset     |           | 2       | 0.0%    |
| Politiker fra Rødt vil senke formueskatten              |           | 1       | 0.0%    |
| Politiker fra Rødt vil senke formueskatten, blir roset  |           | 4       | 0.1%    |
| Politiker fra Rødt vil senke formueskatten, mottar ster |           | 1       | 0.0%    |
| Politiker fra Rødt vil øke formueskatten                |           | 1       | 0.0%    |
| Politiker fra Rødt vil øke formueskatten, blir roset    |           | 1       | 0.0%    |
| Politiker fra Rødt vil øke                              |           | 3       | 0.1%    |

# r7pad14\_headlinesRan\_5: Tilfeldig valgt artikkeloverskrift nr. 5. Bakgrunnsvariabel til konjunksjonseksperiment R7PAD14.

| Verdi                                                   | Merkelapp | Enheter | Prosent |
|---------------------------------------------------------|-----------|---------|---------|
| formueskatten, mottar sterk                             |           |         |         |
| Politiker fra Sp vil senke formueskatten                |           | 4       | 0.1%    |
| Politiker fra Sp vil senke formueskatten, blir roset    |           | 3       | 0.1%    |
| Politiker fra Sp vil senke formueskatten, mottar sterk  |           | 1       | 0.0%    |
| Politiker fra Sp vil øke formueskatten                  |           | 1       | 0.0%    |
| Politiker fra Sp vil øke formueskatten, mottar sterk kr |           | 3       | 0.1%    |
| Politiker fra Sv vil senke formueskatten                |           | 4       | 0.1%    |
| Politiker fra Sv vil senke formueskatten, mottar sterk  |           | 2       | 0.0%    |
| Politiker fra Sv vil øke formueskatten                  |           | 1       | 0.0%    |
| Politiker fra Sv vil øke formueskatten, blir roset      |           | 3       | 0.1%    |
| Politiker fra Sv vil øke formueskatten, mottar sterk kr |           | 1       | 0.0%    |
| Politiker fra Venstre vil senke formueskatten           |           | 1       | 0.0%    |
| Politiker fra Venstre vil senke formueskatten, mottar s |           | 2       | 0.0%    |
| Politiker fra Venstre vil øke formueskatten             |           | 3       | 0.1%    |
| Politiker fra Venstre vil øke formueskatten, blir roset |           | 2       | 0.0%    |
| Politiker fra Venstre vil øke formueskatten, mottar ste |           | 2       | 0.0%    |



# r7pad14\_headlinesRan\_5: Tilfeldig valgt artikkeloverskrift nr. 5. Bakgrunnsvariabel til konjunksjonseksperiment R7PAD14.

| Verdi                                                           | Merkelapp | Enheter | Prosent |
|-----------------------------------------------------------------|-----------|---------|---------|
| Refser forslag<br>fra Ap-topp<br>som vil redusere<br>lønnforskj |           | 5       | 0.1%    |
| Refser forslag<br>fra Frp-topp<br>som vil redusere<br>lønnforsk |           | 2       | 0.0%    |
| Refser forslag<br>fra Frp-topp<br>som vil øke<br>lønnforskjelle |           | 2       | 0.0%    |
| Refser forslag<br>fra Høyre-topp<br>som vil redusere<br>lønnfor |           | 2       | 0.0%    |
| Refser forslag<br>fra Høyre-topp<br>som vil øke<br>lønnforskjel |           | 3       | 0.1%    |
| Refser forslag<br>fra Krf-topp<br>som vil redusere<br>lønnforsk |           | 3       | 0.1%    |
| Refser forslag<br>fra Krf-topp<br>som vil øke<br>lønnforskjelle |           | 2       | 0.0%    |
| Refser forslag<br>fra Mdg-topp<br>som vil redusere<br>lønnforsk |           | 4       | 0.1%    |
| Refser forslag<br>fra Rødt-topp<br>som vil redusere<br>lønnfors |           | 2       | 0.0%    |
| Refser forslag<br>fra Rødt-topp<br>som vil øke<br>lønnforskjell |           | 3       | 0.1%    |
| Refser forslag<br>fra Sp-topp som<br>vil redusere<br>lønnforskj |           | 2       | 0.0%    |
| Refser forslag<br>fra Sp-topp<br>som vil øke<br>lønnforskjeller |           | 6       | 0.1%    |
| Refser forslag<br>fra Sv-topp som<br>vil redusere<br>lønnforskj |           | 5       | 0.1%    |
| Refser forslag<br>fra Sv-topp<br>som vil øke<br>lønnforskjeller |           | 4       | 0.1%    |
| Refser forslag<br>fra Venstre-topp                              |           | 1       | 0.0%    |

# r7pad14\_headlinesRan\_5: Tilfeldig valgt artikkeloverskrift nr. 5. Bakgrunnsvariabel til konjunksjonseksperiment R7PAD14.

| Verdi                                                   | Merkelapp | Enheter | Prosent |
|---------------------------------------------------------|-----------|---------|---------|
| som vil redusere lønnsf                                 |           |         |         |
| Roser forslag fra Venstre-topp som vil øke lønnsforskj  |           | 2       | 0.0%    |
| Roser forslag fra Ap-topp som vil redusere lønnsforskje |           | 1       | 0.0%    |
| Roser forslag fra Ap-topp som vil øke lønnsforskjeller  |           | 3       | 0.1%    |
| Roser forslag fra Frp-topp som vil redusere lønnsforskj |           | 2       | 0.0%    |
| Roser forslag fra Frp-topp som vil øke lønnsforskjeller |           | 3       | 0.1%    |
| Roser forslag fra Høyre-topp som vil redusere lønnsfors |           | 2       | 0.0%    |
| Roser forslag fra Høyre-topp som vil øke lønnsforskjell |           | 3       | 0.1%    |
| Roser forslag fra Krf-topp som vil redusere lønnsforskj |           | 2       | 0.0%    |
| Roser forslag fra Mdg-topp som vil redusere lønnsforskj |           | 3       | 0.1%    |
| Roser forslag fra Mdg-topp som vil øke lønnsforskjeller |           | 1       | 0.0%    |
| Roser forslag fra Rødt-topp som vil redusere lønnsforsk |           | 2       | 0.0%    |
| Roser forslag fra Rødt-topp som vil øke lønnsforskjelle |           | 1       | 0.0%    |
| Roser forslag fra Sp-topp som vil redusere lønnsforskje |           | 2       | 0.0%    |
| Roser forslag fra Sp-topp som vil øke lønnsforskjeller  |           | 3       | 0.1%    |

# r7pad14\_headlinesRan\_5: Tilfeldig valgt artikkeloverskrift nr. 5. Bakgrunnsvariabel til konjunksjonseksperiment R7PAD14.

| Verdi                                                   | Merkelapp | Enheter | Prosent |
|---------------------------------------------------------|-----------|---------|---------|
| Roser forslag fra Sv-topp som vil redusere lønnsforskje |           | 2       | 0.0%    |
| Roser forslag fra Sv-topp som vil øke lønnsforskjeller  |           | 3       | 0.1%    |
| Roser forslag fra Venstre-topp som vil redusere lønnsfo |           | 1       | 0.0%    |
| Roser forslag fra Venstre-topp som vil øke lønnsforskje |           | 1       | 0.0%    |
| Rødt-politiker fordømmes etter Facebook-innlegg: «vi tr |           | 2       | 0.0%    |
| Rødt-politiker får kjeft for forslag som vil øke inntek |           | 2       | 0.0%    |
| Rødt-politiker får kritikk etter facebook-status: «Homo |           | 3       | 0.1%    |
| Rødt-politiker får massiv støtte - vil ikke åpne flere  |           | 1       | 0.0%    |
| Rødt-politiker får massiv støtte - vil åpne flere oljef |           | 3       | 0.1%    |
| Rødt-politiker får pepper for forslag: vil nekte privat |           | 2       | 0.0%    |
| Rødt-politiker får pepper for forslag: vil privatisere  |           | 4       | 0.1%    |
| Rødt-politiker får ros etter facebook-status: «Homofile |           | 2       | 0.0%    |
| Rødt-politiker får skryt for forslag: vil nekte privati |           | 3       | 0.1%    |
| Rødt-politiker hudflettes etter homofiendtlig lovforsla |           | 2       | 0.0%    |
| Rødt-politiker hudflettes etter                         |           | 1       | 0.0%    |

# r7pad14\_headlinesRan\_5: Tilfeldig valgt artikkeloverskrift nr. 5. Bakgrunnsvariabel til konjunksjonseksperiment R7PAD14.

| Verdi                                                     | Merkelapp | Enheter | Prosent |
|-----------------------------------------------------------|-----------|---------|---------|
| homovennlig lovforslag                                    |           |         |         |
| Rødt-politiker hudflettes: mener det burde være vanskelig |           | 1       | 0.0%    |
| Rødt-politiker hudflettes: mener det ikke burde være va   |           | 3       | 0.1%    |
| Rødt-politiker hylles ? mener det er bedre med flere ku   |           | 2       | 0.0%    |
| Rødt-politiker hylles ? mener det er bedre med færre ku   |           | 4       | 0.1%    |
| Rødt-politiker lovprises etter Facebook-innlegg: «vi tr   |           | 2       | 0.0%    |
| Rødt-politiker lovprises etter homofiendtlig lovforslag   |           | 2       | 0.0%    |
| Rødt-politiker lovprises etter homovennlig lovforslag     |           | 3       | 0.1%    |
| Rødt-politiker lovprises: mener det burde være vanskelig  |           | 6       | 0.1%    |
| Rødt-politiker lovprises: mener det ikke burde være van   |           | 5       | 0.1%    |
| Rødt-politiker med Facebook-innlegg: «vi trenger flere    |           | 1       | 0.0%    |
| Rødt-politiker med Facebook-innlegg: «vi trenger ikke f   |           | 2       | 0.0%    |
| Rødt-politiker med forslag som vil redusere inntektsfor   |           | 1       | 0.0%    |
| Rødt-politiker med forslag som vil øke inntektsforskjel   |           | 2       | 0.0%    |
| Rødt-politiker med homofiendtlig lovforslag               |           | 1       | 0.0%    |

# r7pad14\_headlinesRan\_5: Tilfeldig valgt artikkeloverskrift nr. 5. Bakgrunnsvariabel til konjunksjonseksperiment R7PAD14.

| Verdi                                                     | Merkelapp | Enheter | Prosent |
|-----------------------------------------------------------|-----------|---------|---------|
| Rødt-politiker mener alle offentlige aktiviteter ikke k   |           | 4       | 0.1%    |
| Rødt-politiker mener alle offentlige aktiviteter kan gj   |           | 8       | 0.2%    |
| Rødt-politiker mener det burde være vanskeligere for ho   |           | 4       | 0.1%    |
| Rødt-politiker mener det er bedre med færre kulturer og   |           | 1       | 0.0%    |
| Rødt-politiker mener det ikke burde være vanskeligere f   |           | 2       | 0.0%    |
| Rødt-politiker mener flyktninger bør ha samme rett til    |           | 5       | 0.1%    |
| Rødt-politiker mener flyktninger ikke bør ha samme rett   |           | 6       | 0.1%    |
| Rødt-politiker møter massiv motstand - vil åpne flere o   |           | 2       | 0.0%    |
| Rødt-politiker presenterer forslag: vil nekte privatisere |           | 6       | 0.1%    |
| Rødt-politiker presenterer forslag: vil privatisere NSB   |           | 3       | 0.1%    |
| Rødt-politiker på Facebook: «Homofile par MÅ få like re   |           | 5       | 0.1%    |
| Rødt-politiker skjelles ut ? mener det er bedre med fle   |           | 2       | 0.0%    |
| Rødt-politiker skjelles ut ? mener det er bedre med fær   |           | 3       | 0.1%    |
| Rødt-politiker vil åpne flere oljefelt i nord             |           | 1       | 0.0%    |

# r7pad14\_headlinesRan\_5: Tilfeldig valgt artikkeloverskrift nr. 5. Bakgrunnsvariabel til konjunksjonseksperiment R7PAD14.

| Verdi                                                    | Merkelapp | Enheter | Prosent |
|----------------------------------------------------------|-----------|---------|---------|
| Rødt-profil blir hedret etter twittermelding ? vil sten  |           | 1       | 0.0%    |
| Rødt-profil blir hedret etter twittermelding ? vil åpne  |           | 1       | 0.0%    |
| Rødt-profil blir latterliggjort etter twittermelding ? v |           | 5       | 0.1%    |
| Rødt-profil i åpent brev: «jeg vil IKKE at flyktinger s  |           | 9       | 0.2%    |
| Rødt-profil i åpent brev: «jeg vil at flyktinger skal f  |           | 6       | 0.1%    |
| Rødt-profil lanserer forslag om flere privatskoler i No  |           | 2       | 0.0%    |
| Rødt-profil lanserer forslag om færre privatskoler i No  |           | 1       | 0.0%    |
| Rødt-profil mener at kommersielle skoler bør forbys      |           | 1       | 0.0%    |
| Rødt-profil mener at kommersielle skoler bør tillates    |           | 5       | 0.1%    |
| Rødt-profil møter begeistring - mener at kommersielle s  |           | 1       | 0.0%    |
| Rødt-profil møter begeistring for forslag om flere priv  |           | 2       | 0.0%    |
| Rødt-profil møter begeistring for forslag om færre priv  |           | 1       | 0.0%    |
| Rødt-profil møter proteststorm - mener at kommersielle   |           | 5       | 0.1%    |
| Rødt-profil møter                                        |           | 1       | 0.0%    |

# r7pad14\_headlinesRan\_5: Tilfeldig valgt artikkeloverskrift nr. 5. Bakgrunnsvariabel til konjunksjonseksperiment R7PAD14.

| Verdi                                                   | Merkelapp | Enheter | Prosent |
|---------------------------------------------------------|-----------|---------|---------|
| proteststorm for forslag om flere pri                   |           |         |         |
| Rødt-profil møter proteststorm for forslag om færre pri |           | 6       | 0.1%    |
| Rødt-profil på twitter: vil stenge for oljeboring i nor |           | 1       | 0.0%    |
| Rødt-profil på twitter: vil åpne for oljeboring i nord  |           | 2       | 0.0%    |
| Rødt-representant refses ? vil sikre at ingen private s |           | 4       | 0.1%    |
| Rødt-representant refses ? vil åpne for at noen private |           | 7       | 0.1%    |
| Rødt-representant roses ? vil åpne for at noen private  |           | 1       | 0.0%    |
| Rødt-representant vil sikre at ingen private skoler ska |           | 3       | 0.1%    |
| Rødt-representant vil åpne for at noen private skoler s |           | 1       | 0.0%    |
| Rødt-topp kjemper for oljeboring i Lofoten              |           | 2       | 0.0%    |
| Rødt-topp kjemper for oljeboring i Lofoten - får massiv |           | 4       | 0.1%    |
| Rødt-topp kjemper for oljeboring i Lofoten - møter mass |           | 3       | 0.1%    |
| Rødt-topp kjemper mot oljeboring i Lofoten              |           | 3       | 0.1%    |
| Rødt-topp kjemper mot                                   |           | 2       | 0.0%    |

# r7pad14\_headlinesRan\_5: Tilfeldig valgt artikkeloverskrift nr. 5. Bakgrunnsvariabel til konjunksjonseksperiment R7PAD14.

| Verdi                                                   | Merkelapp | Enheter | Prosent |
|---------------------------------------------------------|-----------|---------|---------|
| oljeboring i Lofoten - får massiv                       |           |         |         |
| Rødt-topp mener at skattenivået burde reduseres         |           | 3       | 0.1%    |
| Rødt-topp mener at skattenivået ikke burde reduseres    |           | 4       | 0.1%    |
| Rødt-topp presser på for å gi NAV-penger til Syriske fl |           | 1       | 0.0%    |
| Rødt-topp truer med å ta NAV-penger fra Syriske flyktin |           | 6       | 0.1%    |
| Rødt-topp vil gi mer til de rike                        |           | 4       | 0.1%    |
| Rødt-topp vil gi mer til de rike - blir refset          |           | 4       | 0.1%    |
| Rødt-topp vil ta mer fra de rike                        |           | 1       | 0.0%    |
| Rødt-topp vil ta mer fra de rike - blir refset          |           | 1       | 0.0%    |
| Rødt-topp vil ta mer fra de rike - blir roset           |           | 3       | 0.1%    |
| Rødt-topp: Vil avskaffe eiendomsskatten i alle norske b |           | 4       | 0.1%    |
| Rødt-topp: Vil innføre eiendomsskatt i alle norske byer |           | 1       | 0.0%    |
| Sp-politiker fordømmes etter Facebook-innlegg: «vi tren |           | 2       | 0.0%    |
| Sp-politiker får kjeft for forslag som vil redusere inn |           | 1       | 0.0%    |
| Sp-politiker får kjeft for forslag som vil øke inntekts |           | 1       | 0.0%    |
| Sp-politiker får kritikk etter facebook-status: «Homofi |           | 7       | 0.1%    |
| Sp-politiker får massiv støtte                          |           | 1       | 0.0%    |



# r7pad14\_headlinesRan\_5: Tilfeldig valgt artikkeloverskrift nr. 5. Bakgrunnsvariabel til konjunksjonseksperiment R7PAD14.

| Verdi                                                     | Merkelapp | Enheter | Prosent |
|-----------------------------------------------------------|-----------|---------|---------|
| - vil ikke åpne flere ol                                  |           |         |         |
| Sp-politiker får massiv støtte - vil åpne flere oljefel   |           | 4       | 0.1%    |
| Sp-politiker får pepper for forslag: vil nekte privatis   |           | 1       | 0.0%    |
| Sp-politiker får pepper for forslag: vil privatisere NS   |           | 3       | 0.1%    |
| Sp-politiker får ros etter facebook-status: «Homofile p   |           | 8       | 0.2%    |
| Sp-politiker får skryt for forslag som vil øke inntekts   |           | 3       | 0.1%    |
| Sp-politiker får skryt for forslag: vil nekte privatisere |           | 4       | 0.1%    |
| Sp-politiker får skryt for forslag: vil privatisere NSB   |           | 2       | 0.0%    |
| Sp-politiker hudflettes etter homovennlig lovforslag      |           | 1       | 0.0%    |
| Sp-politiker hudflettes: mener det burde være vanskelig   |           | 3       | 0.1%    |
| Sp-politiker hudflettes: mener det ikke burde være vans   |           | 6       | 0.1%    |
| Sp-politiker hylles ? mener det er bedre med færre kult   |           | 3       | 0.1%    |
| Sp-politiker lovprises etter Facebook-innlegg: «vi tren   |           | 5       | 0.1%    |
| Sp-politiker lovprises etter homofiendtlig lovforslag     |           | 3       | 0.1%    |
| Sp-politiker lovprises etter homovennlig lovforslag       |           | 3       | 0.1%    |

# r7pad14\_headlinesRan\_5: Tilfeldig valgt artikkeloverskrift nr. 5. Bakgrunnsvariabel til konjunksjonseksperiment R7PAD14.

| Verdi                                                                | Merkelapp | Enheter | Prosent |
|----------------------------------------------------------------------|-----------|---------|---------|
| Sp-politiker<br>lovprises: mener<br>det ikke burde<br>være vanskelig |           | 2       | 0.0%    |
| Sp-politiker<br>med Facebook-<br>innlegg: «vi<br>trenger flere mu    |           | 3       | 0.1%    |
| Sp-politiker<br>med Facebook-<br>innlegg: «vi<br>trenger ikke fle    |           | 2       | 0.0%    |
| Sp-politiker<br>med forslag<br>som vil redusere<br>inntektsforsk     |           | 1       | 0.0%    |
| Sp-politiker<br>med forslag<br>som vil øke<br>inntektsforskjelle     |           | 3       | 0.1%    |
| Sp-politiker med<br>homofiendtlig<br>lovforslag                      |           | 3       | 0.1%    |
| Sp-politiker med<br>homovennlig<br>lovforslag                        |           | 2       | 0.0%    |
| Sp-politiker<br>mener alle<br>offentlige<br>aktiviteter ikke<br>kan  |           | 4       | 0.1%    |
| Sp-politiker<br>mener alle<br>offentlige<br>aktiviteter kan<br>gjør  |           | 9       | 0.2%    |
| Sp-politiker<br>mener det<br>burde være<br>vanskeligere for<br>homo  |           | 2       | 0.0%    |
| Sp-politiker<br>mener det er<br>bedre med færre<br>kulturer og r     |           | 4       | 0.1%    |
| Sp-politiker<br>mener det ikke<br>burde være<br>vanskeligere for     |           | 3       | 0.1%    |
| Sp-politiker<br>mener<br>flyktninger bør<br>ha samme rett til<br>so  |           | 3       | 0.1%    |
| Sp-politiker<br>mener<br>flyktninger ikke<br>bør ha samme<br>rett t  |           | 2       | 0.0%    |

# r7pad14\_headlinesRan\_5: Tilfeldig valgt artikkeloverskrift nr. 5. Bakgrunnsvariabel til konjunksjonseksperiment R7PAD14.

| Verdi                                                   | Merkelapp | Enheter | Prosent |
|---------------------------------------------------------|-----------|---------|---------|
| Sp-politiker møter massiv motstand - vil ikke åpne fler |           | 1       | 0.0%    |
| Sp-politiker presenterer forslag: vil nekte privatiseri |           | 3       | 0.1%    |
| Sp-politiker presenterer forslag: vil privatisere NSB   |           | 2       | 0.0%    |
| Sp-politiker på Facebook: «Homofile par MÅ IKKE få like |           | 7       | 0.1%    |
| Sp-politiker på Facebook: «Homofile par MÅ få like rett |           | 1       | 0.0%    |
| Sp-politiker skjelles ut ? mener det er bedre med flere |           | 2       | 0.0%    |
| Sp-politiker skjelles ut ? mener det er bedre med færre |           | 1       | 0.0%    |
| Sp-politiker vil ikke åpne flere oljefelt i nord        |           | 3       | 0.1%    |
| Sp-politiker vil åpne flere oljefelt i nord             |           | 2       | 0.0%    |
| Sp-profil blir hedret etter twittermelding ? vil stenge |           | 2       | 0.0%    |
| Sp-profil blir hedret etter twittermelding ? vil åpne f |           | 2       | 0.0%    |
| Sp-profil blir latterligjort etter twittermelding ? vil |           | 3       | 0.1%    |
| Sp-profil i åpent brev: «jeg vil IKKE at flyktinger ska |           | 5       | 0.1%    |
| Sp-profil i åpent brev: «jeg vil at flyktinger skal få  |           | 6       | 0.1%    |
| Sp-profil lanserer forslag om flere                     |           | 2       | 0.0%    |

# r7pad14\_headlinesRan\_5: Tilfeldig valgt artikkeloverskrift nr. 5. Bakgrunnsvariabel til konjunksjonseksperiment R7PAD14.

| Verdi                                                   | Merkelapp | Enheter | Prosent |
|---------------------------------------------------------|-----------|---------|---------|
| privatskoler i Norg                                     |           |         |         |
| Sp-profil lanserer forslag om færre privatskoler i Norg |           | 2       | 0.0%    |
| Sp-profil mener at kommersielle skoler bør forbys       |           | 4       | 0.1%    |
| Sp-profil mener at kommersielle skoler bør tillates     |           | 3       | 0.1%    |
| Sp-profil møter begeistring - mener at kommersielle sko |           | 1       | 0.0%    |
| Sp-profil møter begeistring for forslag om flere privat |           | 2       | 0.0%    |
| Sp-profil møter begeistring for forslag om færre privat |           | 2       | 0.0%    |
| Sp-profil møter proteststorm - mener at kommersielle sk |           | 7       | 0.1%    |
| Sp-profil møter proteststorm for forslag om flere priva |           | 1       | 0.0%    |
| Sp-profil møter proteststorm for forslag om færre priva |           | 2       | 0.0%    |
| Sp-profil på twitter: vil stenge for oljeboring i nord  |           | 2       | 0.0%    |
| Sp-profil på twitter: vil åpne for oljeboring i nord    |           | 1       | 0.0%    |
| Sp-representant refses ? vil sikre at ingen private sko |           | 3       | 0.1%    |
| Sp-representant refses ? vil åpne for at noen private s |           | 1       | 0.0%    |
| Sp-representant roses ? vil sikre                       |           | 2       | 0.0%    |

# r7pad14\_headlinesRan\_5: Tilfeldig valgt artikkeloverskrift nr. 5. Bakgrunnsvariabel til konjunksjonseksperiment R7PAD14.

| Verdi                                                   | Merkelapp | Enheter | Prosent |
|---------------------------------------------------------|-----------|---------|---------|
| at ingen private skol                                   |           |         |         |
| Sp-representant roses ? vil åpne for at noen private sk |           | 2       | 0.0%    |
| Sp-representant vil sikre at ingen private skoler skal  |           | 3       | 0.1%    |
| Sp-representant vil åpne for at noen private skoler ska |           | 2       | 0.0%    |
| Sp-topp kjemper for oljeboring i Lofoten                |           | 6       | 0.1%    |
| Sp-topp kjemper for oljeboring i Lofoten - får massiv s |           | 2       | 0.0%    |
| Sp-topp kjemper for oljeboring i Lofoten - møter massiv |           | 1       | 0.0%    |
| Sp-topp kjemper mot oljeboring i Lofoten                |           | 1       | 0.0%    |
| Sp-topp kjemper mot oljeboring i Lofoten - får massiv s |           | 2       | 0.0%    |
| Sp-topp mener at skattenivået burde reduseres           |           | 1       | 0.0%    |
| Sp-topp presser på for å gi NAV-penger til Syriske flyk |           | 10      | 0.2%    |
| Sp-topp truer med å ta NAV-penger fra Syriske flyktinge |           | 5       | 0.1%    |
| Sp-topp vil gi mer til de rike                          |           | 2       | 0.0%    |
| Sp-topp vil gi mer til de rike - blir refset            |           | 3       | 0.1%    |
| Sp-topp vil ta mer fra de rike                          |           | 2       | 0.0%    |
| Sp-topp vil ta mer fra de rike - blir refset            |           | 2       | 0.0%    |
| Sp-topp vil ta mer fra de rike - blir roset             |           | 1       | 0.0%    |

# r7pad14\_headlinesRan\_5: Tilfeldig valgt artikkeloverskrift nr. 5. Bakgrunnsvariabel til konjunksjonseksperiment R7PAD14.

| Verdi                                                       | Merkelapp | Enheter | Prosent |
|-------------------------------------------------------------|-----------|---------|---------|
| Sp-topp:<br>Vil avskaffe eiendomsskatten i alle norske byer |           | 3       | 0.1%    |
| Sp-topp:<br>Vil innføre eiendomsskatt i alle norske byer.   |           | 2       | 0.0%    |
| Stjernespiller<br>kampklar til morgendagens kamp            |           | 10      | 0.2%    |
| Stjernespiller<br>snakker om morgendagens kamp              |           | 15      | 0.3%    |
| Stjernespiller ute med skade til morgendagens kamp          |           | 6       | 0.1%    |
| Stormer mot Ap-topp:<br>Vil avskaffe eiendomsskatten i all  |           | 4       | 0.1%    |
| Stormer mot Ap-topp: Vil innføre eiendomsskatt i alle n     |           | 1       | 0.0%    |
| Stormer mot Frp-topp:<br>Vil avskaffe eiendomsskatten i al  |           | 1       | 0.0%    |
| Stormer mot Frp-topp:<br>Vil innføre eiendomsskatt i alle   |           | 4       | 0.1%    |
| Stormer mot Høyre-topp:<br>Vil avskaffe eiendomsskatten i   |           | 1       | 0.0%    |
| Stormer mot Høyre-topp:<br>Vil innføre eiendomsskatt i all  |           | 2       | 0.0%    |
| Stormer mot Krf-topp:<br>Vil innføre eiendomsskatt i alle   |           | 4       | 0.1%    |
| Stormer mot Mdg-topp:<br>Vil avskaffe eiendomsskatten i al  |           | 3       | 0.1%    |

# r7pad14\_headlinesRan\_5: Tilfeldig valgt artikkeloverskrift nr. 5. Bakgrunnsvariabel til konjunksjonseksperiment R7PAD14.

| Verdi                                                   | Merkelapp | Enheter | Prosent |
|---------------------------------------------------------|-----------|---------|---------|
| Stormer mot Mdg-topp: Vil innføre eiendomsskatt i alle  |           | 6       | 0.1%    |
| Stormer mot Rødt-topp: Vil avskaffe eiendomsskatten i a |           | 2       | 0.0%    |
| Stormer mot Rødt-topp: Vil innføre eiendomsskatt i alle |           | 1       | 0.0%    |
| Stormer mot Sp-topp: Vil avskaffe eiendomsskatten i all |           | 2       | 0.0%    |
| Stormer mot Sp-topp: Vil innføre eiendomsskatt i alle n |           | 3       | 0.1%    |
| Stormer mot Sv-topp: Vil avskaffe eiendomsskatten i all |           | 1       | 0.0%    |
| Stormer mot Sv-topp: Vil innføre eiendomsskatt i alle n |           | 3       | 0.1%    |
| Stormer mot Venstre-topp: Vil avskaffe eiendomsskatten  |           | 2       | 0.0%    |
| Suksesshistoriene om høstens treningstrend              |           | 18      | 0.4%    |
| Sv-politiker fordømmes etter Facebook-innlegg: «vi tren |           | 2       | 0.0%    |
| Sv-politiker får kjeft for forslag som vil redusere inn |           | 5       | 0.1%    |
| Sv-politiker får kjeft for forslag som vil øke inntekts |           | 4       | 0.1%    |
| Sv-politiker får kritikk etter facebook-status: «Homofi |           | 2       | 0.0%    |
| Sv-politiker får massiv støtte                          |           | 3       | 0.1%    |

# r7pad14\_headlinesRan\_5: Tilfeldig valgt artikkeloverskrift nr. 5. Bakgrunnsvariabel til konjunksjonseksperiment R7PAD14.

| Verdi                                                     | Merkelapp | Enheter | Prosent |
|-----------------------------------------------------------|-----------|---------|---------|
| - vil ikke åpne flere ol                                  |           |         |         |
| Sv-politiker får massiv støtte - vil åpne flere oljefel   |           | 1       | 0.0%    |
| Sv-politiker får pepper for forslag: vil privatisere NS   |           | 1       | 0.0%    |
| Sv-politiker får ros etter facebook-status: «Homofile p   |           | 3       | 0.1%    |
| Sv-politiker får skryt for forslag som vil redusere inn   |           | 2       | 0.0%    |
| Sv-politiker får skryt for forslag som vil øke inntekts   |           | 3       | 0.1%    |
| Sv-politiker får skryt for forslag: vil nekte privatisere |           | 1       | 0.0%    |
| Sv-politiker hudflettes etter homofiendtlig lovforslag    |           | 4       | 0.1%    |
| Sv-politiker hudflettes etter homovenntlig lovforslag     |           | 4       | 0.1%    |
| Sv-politiker hudflettes: mener det burde være vanskelig   |           | 4       | 0.1%    |
| Sv-politiker hudflettes: mener det ikke burde være vans   |           | 3       | 0.1%    |
| Sv-politiker hylles ? mener det er bedre med flere kult   |           | 2       | 0.0%    |
| Sv-politiker hylles ? mener det er bedre med færre kult   |           | 3       | 0.1%    |
| Sv-politiker lovprises etter Facebook-innlegg: «vi tren   |           | 4       | 0.1%    |
| Sv-politiker lovprises etter homofiendtlig lovforslag     |           | 1       | 0.0%    |



# r7pad14\_headlinesRan\_5: Tilfeldig valgt artikkeloverskrift nr. 5. Bakgrunnsvariabel til konjunksjonseksperiment R7PAD14.

| Verdi                                                   | Merkelapp | Enheter | Prosent |
|---------------------------------------------------------|-----------|---------|---------|
| Sv-politiker lovprises etter homovennlig lovforslag     |           | 2       | 0.0%    |
| Sv-politiker lovprises: mener det burde være vanskelige |           | 1       | 0.0%    |
| Sv-politiker med Facebook-innlegg: «vi trenger flere mu |           | 2       | 0.0%    |
| Sv-politiker med forslag som vil øke inntektsforskjelle |           | 1       | 0.0%    |
| Sv-politiker med homofiendtlig lovforslag               |           | 4       | 0.1%    |
| Sv-politiker med homovennlig lovforslag                 |           | 2       | 0.0%    |
| Sv-politiker mener alle offentlige aktiviteter ikke kan |           | 8       | 0.2%    |
| Sv-politiker mener alle offentlige aktiviteter kan gjør |           | 7       | 0.1%    |
| Sv-politiker mener det burde være vanskeligere for homo |           | 2       | 0.0%    |
| Sv-politiker mener det er bedre med flere kulturer og r |           | 4       | 0.1%    |
| Sv-politiker mener det er bedre med færre kulturer og r |           | 2       | 0.0%    |
| Sv-politiker mener det ikke burde være vanskeligere for |           | 1       | 0.0%    |
| Sv-politiker mener flyktninger bør ha samme rett til so |           | 8       | 0.2%    |
| Sv-politiker mener flyktninger ikke bør ha samme rett t |           | 3       | 0.1%    |

# r7pad14\_headlinesRan\_5: Tilfeldig valgt artikkeloverskrift nr. 5. Bakgrunnsvariabel til konjunksjonseksperiment R7PAD14.

| Verdi                                                   | Merkelapp | Enheter | Prosent |
|---------------------------------------------------------|-----------|---------|---------|
| Sv-politiker møter massiv motstand - vil åpne flere olj |           | 3       | 0.1%    |
| Sv-politiker presenterer forslag: vil nekte privatiseri |           | 4       | 0.1%    |
| Sv-politiker presenterer forslag: vil privatisere NSB   |           | 2       | 0.0%    |
| Sv-politiker på Facebook: «Homofile par MÅ IKKE få like |           | 2       | 0.0%    |
| Sv-politiker på Facebook: «Homofile par MÅ få like rett |           | 2       | 0.0%    |
| Sv-politiker skjelles ut ? mener det er bedre med flere |           | 3       | 0.1%    |
| Sv-politiker skjelles ut ? mener det er bedre med færre |           | 1       | 0.0%    |
| Sv-politiker vil ikke åpne flere oljefelt i nord        |           | 2       | 0.0%    |
| Sv-politiker vil åpne flere oljefelt i nord             |           | 2       | 0.0%    |
| Sv-profil blir hedret etter twittermelding ? vil stenge |           | 3       | 0.1%    |
| Sv-profil blir hedret etter twittermelding ? vil åpne f |           | 2       | 0.0%    |
| Sv-profil blir latterligjort etter twittermelding ? vil |           | 6       | 0.1%    |
| Sv-profil i åpent brev: «jeg vil IKKE at flyktinger ska |           | 6       | 0.1%    |
| Sv-profil i åpent brev: «jeg vil at flyktinger skal få  |           | 8       | 0.2%    |
| Sv-profil lanserer forslag om flere                     |           | 1       | 0.0%    |

# r7pad14\_headlinesRan\_5: Tilfeldig valgt artikkeloverskrift nr. 5. Bakgrunnsvariabel til konjunksjonseksperiment R7PAD14.

| Verdi                                                   | Merkelapp | Enheter | Prosent |
|---------------------------------------------------------|-----------|---------|---------|
| privatskoler i Norg                                     |           |         |         |
| Sv-profil lanserer forslag om færre privatskoler i Norg |           | 2       | 0.0%    |
| Sv-profil mener at kommersielle skoler bør forbys       |           | 3       | 0.1%    |
| Sv-profil mener at kommersielle skoler bør tillates     |           | 1       | 0.0%    |
| Sv-profil møter begeistring - mener at kommersielle sko |           | 6       | 0.1%    |
| Sv-profil møter begeistring for forslag om flere privat |           | 4       | 0.1%    |
| Sv-profil møter begeistring for forslag om færre privat |           | 3       | 0.1%    |
| Sv-profil møter proteststorm - mener at kommersielle sk |           | 5       | 0.1%    |
| Sv-profil møter proteststorm for forslag om flere priva |           | 4       | 0.1%    |
| Sv-profil møter proteststorm for forslag om færre priva |           | 2       | 0.0%    |
| Sv-profil på twitter: vil stenge for oljeboring i nord  |           | 4       | 0.1%    |
| Sv-profil på twitter: vil åpne for oljeboring i nord    |           | 1       | 0.0%    |
| Sv-representant refses ? vil sikre at ingen private sko |           | 1       | 0.0%    |
| Sv-representant refses ? vil åpne for at noen private s |           | 3       | 0.1%    |
| Sv-representant roses ? vil sikre                       |           | 1       | 0.0%    |

# r7pad14\_headlinesRan\_5: Tilfeldig valgt artikkeloverskrift nr. 5. Bakgrunnsvariabel til konjunksjonseksperiment R7PAD14.

| Verdi                                                   | Merkelapp | Enheter | Prosent |
|---------------------------------------------------------|-----------|---------|---------|
| at ingen private skol                                   |           |         |         |
| Sv-representant roses ? vil åpne for at noen private sk |           | 3       | 0.1%    |
| Sv-representant vil sikre at ingen private skoler skal  |           | 3       | 0.1%    |
| Sv-topp kjemper for oljeboring i Lofoten                |           | 3       | 0.1%    |
| Sv-topp kjemper for oljeboring i Lofoten - får massiv s |           | 4       | 0.1%    |
| Sv-topp kjemper for oljeboring i Lofoten - møter massiv |           | 3       | 0.1%    |
| Sv-topp kjemper mot oljeboring i Lofoten                |           | 3       | 0.1%    |
| Sv-topp kjemper mot oljeboring i Lofoten - får massiv s |           | 1       | 0.0%    |
| Sv-topp kjemper mot oljeboring i Lofoten - møter massiv |           | 2       | 0.0%    |
| Sv-topp mener at skattenivået burde reduseres           |           | 2       | 0.0%    |
| Sv-topp mener at skattenivået ikke burde reduseres      |           | 2       | 0.0%    |
| Sv-topp presser på for å gi NAV-penger til Syriske flyk |           | 7       | 0.1%    |
| Sv-topp truer med å ta NAV-penger fra Syriske flyktinge |           | 6       | 0.1%    |
| Sv-topp vil gi mer til de rike                          |           | 3       | 0.1%    |
| Sv-topp vil gi mer til de rike - blir refset            |           | 5       | 0.1%    |
| Sv-topp vil gi mer til de rike - blir roset             |           | 2       | 0.0%    |
| Sv-topp vil ta mer fra de rike                          |           | 3       | 0.1%    |

# r7pad14\_headlinesRan\_5: Tilfeldig valgt artikkeloverskrift nr. 5. Bakgrunnsvariabel til konjunksjonseksperiment R7PAD14.

| Verdi                                                   | Merkelapp | Enheter | Prosent |
|---------------------------------------------------------|-----------|---------|---------|
| Sv-topp vil ta mer fra de rike - blir refset            |           | 5       | 0.1%    |
| Sv-topp vil ta mer fra de rike - blir roset             |           | 1       | 0.0%    |
| Sv-topp: Vil avskaffe eiendomsskatten i alle norske bye |           | 1       | 0.0%    |
| TV-profiler gifter seg                                  |           | 12      | 0.3%    |
| TV-profiler skiller seg                                 |           | 11      | 0.2%    |
| TV-profiler snakker om livet sammen                     |           | 14      | 0.3%    |
| Tror Norge spiller uavgjort i morgendagens fotballkamp  |           | 12      | 0.3%    |
| Tror Norge taper i morgendagens fotballkamp             |           | 13      | 0.3%    |
| Tror Norge vinner i morgendagens fotballkamp            |           | 11      | 0.2%    |
| Venstre-politiker fordømmes etter Facebook-innlegg: «vi |           | 9       | 0.2%    |
| Venstre-politiker får kjeft for forslag som vil reduser |           | 1       | 0.0%    |
| Venstre-politiker får kjeft for forslag som vil øke inn |           | 2       | 0.0%    |
| Venstre-politiker får kritikk etter facebook-status: «H |           | 3       | 0.1%    |
| Venstre-politiker får massiv støtte - vil ikke åpne fle |           | 1       | 0.0%    |
| Venstre-politiker får massiv støtte - vil åpne flere ol |           | 1       | 0.0%    |
| Venstre-politiker får ros etter facebook-status: «Homof |           | 4       | 0.1%    |
| Venstre-politiker får skryt for                         |           | 2       | 0.0%    |

# r7pad14\_headlinesRan\_5: Tilfeldig valgt artikkeloverskrift nr. 5. Bakgrunnsvariabel til konjunksjonseksperiment R7PAD14.

| Verdi                                                   | Merkelapp | Enheter | Prosent |
|---------------------------------------------------------|-----------|---------|---------|
| forslag som vil redusere                                |           |         |         |
| Venstre-politiker får skryt for forslag som vil øke inn |           | 1       | 0.0%    |
| Venstre-politiker får skryt for forslag: vil nekte priv |           | 7       | 0.1%    |
| Venstre-politiker får skryt for forslag: vil privatiser |           | 1       | 0.0%    |
| Venstre-politiker hudflettes etter homofiendtlig lovfor |           | 3       | 0.1%    |
| Venstre-politiker hudflettes etter homovennlig lovforsl |           | 3       | 0.1%    |
| Venstre-politiker hudflettes: mener det burde være vans |           | 5       | 0.1%    |
| Venstre-politiker hudflettes: mener det ikke burde være |           | 2       | 0.0%    |
| Venstre-politiker hylles ? mener det er bedre med flere |           | 1       | 0.0%    |
| Venstre-politiker hylles ? mener det er bedre med færre |           | 3       | 0.1%    |
| Venstre-politiker lovprises etter Facebook-innlegg: «vi |           | 3       | 0.1%    |
| Venstre-politiker lovprises etter homofiendtlig lovfors |           | 2       | 0.0%    |
| Venstre-politiker lovprises: mener det burde være vansk |           | 2       | 0.0%    |
| Venstre-politiker lovprises: mener det ikke burde være  |           | 1       | 0.0%    |
| Venstre-politiker med Facebook-innlegg: «vi trenger fle |           | 3       | 0.1%    |

# r7pad14\_headlinesRan\_5: Tilfeldig valgt artikkeloverskrift nr. 5. Bakgrunnsvariabel til konjunksjonseksperiment R7PAD14.

| Verdi                                                   | Merkelapp | Enheter | Prosent |
|---------------------------------------------------------|-----------|---------|---------|
| Venstre-politiker med Facebook-innlegg: «vi trenger ikk |           | 4       | 0.1%    |
| Venstre-politiker med forslag som vil redusere inntekts |           | 2       | 0.0%    |
| Venstre-politiker med forslag som vil øke inntektsforsk |           | 2       | 0.0%    |
| Venstre-politiker med homovennlig lovforslag            |           | 2       | 0.0%    |
| Venstre-politiker mener alle offentlige aktiviteter ikk |           | 7       | 0.1%    |
| Venstre-politiker mener alle offentlige aktiviteter kan |           | 2       | 0.0%    |
| Venstre-politiker mener det burde være vanskeligere for |           | 1       | 0.0%    |
| Venstre-politiker mener det er bedre med flere kulturer |           | 5       | 0.1%    |
| Venstre-politiker mener det er bedre med færre kulturer |           | 2       | 0.0%    |
| Venstre-politiker mener flyktninger bør ha samme rett t |           | 3       | 0.1%    |
| Venstre-politiker mener flyktninger ikke bør ha samme r |           | 7       | 0.1%    |
| Venstre-politiker møter massiv motstand - vil ikke åpne |           | 2       | 0.0%    |
| Venstre-politiker møter massiv motstand - vil åpne fler |           | 2       | 0.0%    |
| Venstre-politiker presenterer forslag: vil privatisere  |           | 1       | 0.0%    |
| Venstre-politiker på Facebook:                          |           | 2       | 0.0%    |

# r7pad14\_headlinesRan\_5: Tilfeldig valgt artikkeloverskrift nr. 5. Bakgrunnsvariabel til konjunksjonseksperiment R7PAD14.

| Verdi                                                                | Merkelapp | Enheter | Prosent |
|----------------------------------------------------------------------|-----------|---------|---------|
| «Homofile par<br>MÅ IKKE få                                          |           |         |         |
| Venstre-politiker<br>på Facebook:<br>«Homofile par<br>MÅ få like     |           | 1       | 0.0%    |
| Venstre-politiker<br>skjelles ut ?<br>mener det er<br>bedre med      |           | 3       | 0.1%    |
| Venstre-politiker<br>vil ikke åpne<br>flere oljefelt i<br>nord       |           | 5       | 0.1%    |
| Venstre-politiker<br>vil åpne flere<br>oljefelt i nord               |           | 1       | 0.0%    |
| Venstre-profil<br>blir hedret etter<br>twittermelding ?<br>vil s     |           | 3       | 0.1%    |
| Venstre-profil<br>blir hedret etter<br>twittermelding ?<br>vil å     |           | 3       | 0.1%    |
| Venstre-<br>profil blir<br>latterligjort etter<br>twittermelding     |           | 5       | 0.1%    |
| Venstre-profil<br>i åpent brev:<br>«jeg vil IKKE at<br>flyktinge     |           | 3       | 0.1%    |
| Venstre-profil i<br>åpent brev: «jeg<br>vil at flyktinger<br>ska     |           | 9       | 0.2%    |
| Venstre-<br>profil lanserer<br>forslag om flere<br>privatskoler i    |           | 4       | 0.1%    |
| Venstre-profil<br>lanserer forslag<br>om færre<br>privatskoler i     |           | 3       | 0.1%    |
| Venstre-<br>profil møter<br>begeistring<br>- mener at<br>kommersiell |           | 3       | 0.1%    |
| Venstre-<br>profil møter<br>begeistring for<br>forslag om færre<br>p |           | 1       | 0.0%    |
| Venstre-<br>profil møter<br>proteststorm                             |           | 2       | 0.0%    |



# r7pad14\_headlinesRan\_5: Tilfeldig valgt artikkeloverskrift nr. 5. Bakgrunnsvariabel til konjunksjonseksperiment R7PAD14.

| Verdi                                                   | Merkelapp | Enheter | Prosent |
|---------------------------------------------------------|-----------|---------|---------|
| - mener at kommersiel                                   |           |         |         |
| Venstre-profil møter proteststorm for forslag om flere  |           | 1       | 0.0%    |
| Venstre-profil møter proteststorm for forslag om færre  |           | 1       | 0.0%    |
| Venstre-profil på twitter: vil stenge for oljeboring i  |           | 1       | 0.0%    |
| Venstre-profil på twitter: vil åpne for oljeboring i no |           | 3       | 0.1%    |
| Venstre-representant refses ? vil sikre at ingen privat |           | 2       | 0.0%    |
| Venstre-representant refses ? vil åpne for at noen priv |           | 1       | 0.0%    |
| Venstre-representant roses ? vil sikre at ingen private |           | 2       | 0.0%    |
| Venstre-representant vil sikre at ingen private skoler  |           | 2       | 0.0%    |
| Venstre-representant vil åpne for at noen private skole |           | 3       | 0.1%    |
| Venstre-topp kjemper for oljeboring i Lofoten           |           | 2       | 0.0%    |
| Venstre-topp kjemper for oljeboring i Lofoten - får mas |           | 4       | 0.1%    |
| Venstre-topp kjemper mot oljeboring i Lofoten           |           | 6       | 0.1%    |
| Venstre-topp kjemper mot oljeboring i Lofoten - får mas |           | 3       | 0.1%    |
| Venstre-topp mener at                                   |           | 3       | 0.1%    |

# r7pad14\_headlinesRan\_5: Tilfeldig valgt artikkeloverskrift nr. 5. Bakgrunnsvariabel til konjunksjonseksperiment R7PAD14.

| Verdi                                                   | Merkelapp | Enheter | Prosent |
|---------------------------------------------------------|-----------|---------|---------|
| skattenivået burde reduseres                            |           |         |         |
| Venstre-topp mener at skattenivået ikke burde reduseres |           | 2       | 0.0%    |
| Venstre-topp presser på for å gi NAV-penger til Syriske |           | 8       | 0.2%    |
| Venstre-topp truer med å ta NAV-penger fra Syriske flyk |           | 7       | 0.1%    |
| Venstre-topp vil gi mer til de rike                     |           | 3       | 0.1%    |
| Venstre-topp vil gi mer til de rike - blir refset       |           | 3       | 0.1%    |
| Venstre-topp vil ta mer fra de rike                     |           | 3       | 0.1%    |
| Venstre-topp vil ta mer fra de rike - blir refset       |           | 3       | 0.1%    |
| Venstre-topp vil ta mer fra de rike - blir roset        |           | 1       | 0.0%    |
| Venstre-topp: Vil innføre eiendomsskatt i alle norske b |           | 4       | 0.1%    |

Advarsel: disse tallene indikerer antall enheter (cases) i datafilen. De kan ikke tolkes som oppsummert statistikk for populasjonen.

# r7pad14\_headlinesRan\_6: Tilfeldig valgt artikkeloverskrift nr. 6. Bakgrunnsvariabel til konjunksjonseksperiment R7PAD14.

|                                |                                                                                                                                                                                                                                 |
|--------------------------------|---------------------------------------------------------------------------------------------------------------------------------------------------------------------------------------------------------------------------------|
| Informasjon                    | [Type= diskret] [Format=character] [Missing=*]                                                                                                                                                                                  |
| Statistikk [NW/ W]             | [Gyldige=4689 /-] [Ugyldig=0 /-]                                                                                                                                                                                                |
| Instruksjoner til intervjueren | [Lagrer en tilfeldig valgt nyhetsartikkel eller underholdningsartikkel fra en populasjon av 1296 nyhetsartikler og 36 underholdningsartikler. Kontakt Sveinung Arnesen eller Mikael Johannesson for den fullstendige listen. .] |

| Verdi                                                   | Merkelapp | Enheter | Prosent |
|---------------------------------------------------------|-----------|---------|---------|
|                                                         |           | 1606    | 34.3%   |
| Ap-politiker fordømmes etter Facebook-innlegg: «vi tren |           | 2       | 0.0%    |
| Ap-politiker får kjeft for forslag som vil redusere inn |           | 3       | 0.1%    |
| Ap-politiker får kjeft for forslag som vil øke inntekts |           | 1       | 0.0%    |
| Ap-politiker får kritikk etter                          |           | 5       | 0.1%    |

# r7pad14\_headlinesRan\_6: Tilfeldig valgt artikkeloverskrift nr. 6. Bakgrunnsvariabel til konjunksjonseksperiment R7PAD14.

| Verdi                                                            | Merkelapp | Enheter | Prosent |
|------------------------------------------------------------------|-----------|---------|---------|
| facebook-status:<br>«Homofi                                      |           |         |         |
| Ap-politiker får<br>massiv støtte -<br>vil åpne flere<br>oljefel |           | 2       | 0.0%    |
| Ap-politiker<br>får pepper for<br>forslag: vil nekte<br>privatis |           | 2       | 0.0%    |
| Ap-politiker<br>får pepper for<br>forslag: vil<br>privatisere NS |           | 4       | 0.1%    |
| Ap-politiker<br>får ros etter<br>facebook-status:<br>«Homofile p |           | 6       | 0.1%    |
| Ap-politiker får<br>skryt for forslag<br>som vil redusere<br>inn |           | 6       | 0.1%    |
| Ap-politiker får<br>skryt for forslag<br>som vil øke<br>inntekts |           | 5       | 0.1%    |
| Ap-politiker<br>får skryt for<br>forslag: vil nekte<br>privatise |           | 4       | 0.1%    |
| Ap-politiker får<br>skryt for forslag:<br>vil privatisere<br>NSB |           | 1       | 0.0%    |
| Ap-politiker<br>hudflettes etter<br>homofiendtlig<br>lovforslag  |           | 4       | 0.1%    |
| Ap-politiker<br>hudflettes etter<br>homovennlig<br>lovforslag    |           | 4       | 0.1%    |
| Ap-politiker<br>hudflettes:<br>mener det burde<br>være vanskelig |           | 3       | 0.1%    |
| Ap-politiker<br>hudflettes:<br>mener det ikke<br>burde være vans |           | 1       | 0.0%    |
| Ap-politiker<br>hylles ? mener<br>det er bedre med<br>flere kult |           | 2       | 0.0%    |
| Ap-politiker<br>hylles ? mener<br>det er bedre med<br>færre kult |           | 4       | 0.1%    |

# r7pad14\_headlinesRan\_6: Tilfeldig valgt artikkeloverskrift nr. 6. Bakgrunnsvariabel til konjunksjonseksperiment R7PAD14.

| Verdi                                                               | Merkelapp | Enheter | Prosent |
|---------------------------------------------------------------------|-----------|---------|---------|
| Ap-politiker<br>lovpriser etter<br>Facebook-<br>innlegg: «vi tren   |           | 4       | 0.1%    |
| Ap-politiker<br>lovpriser etter<br>homofiendtlig<br>lovforslag      |           | 2       | 0.0%    |
| Ap-politiker<br>lovpriser etter<br>homovennlig<br>lovforslag        |           | 4       | 0.1%    |
| Ap-politiker<br>lovpriser: mener<br>det burde være<br>vanskelige    |           | 1       | 0.0%    |
| Ap-politiker<br>lovpriser: mener<br>det ikke burde<br>være vansk    |           | 4       | 0.1%    |
| Ap-politiker<br>med Facebook-<br>innlegg: «vi<br>trenger flere mu   |           | 3       | 0.1%    |
| Ap-politiker<br>med Facebook-<br>innlegg: «vi<br>trenger ikke fle   |           | 1       | 0.0%    |
| Ap-politiker<br>med forslag<br>som vil redusere<br>inntektsforsk    |           | 1       | 0.0%    |
| Ap-politiker<br>med forslag<br>som vil øke<br>inntektsforskjelle    |           | 2       | 0.0%    |
| Ap-politiker med<br>homovennlig<br>lovforslag                       |           | 1       | 0.0%    |
| Ap-politiker<br>mener alle<br>offentlige<br>aktiviteter ikke<br>kan |           | 1       | 0.0%    |
| Ap-politiker<br>mener alle<br>offentlige<br>aktiviteter kan<br>gjør |           | 1       | 0.0%    |
| Ap-politiker<br>mener det<br>burde være<br>vanskeligere for<br>homo |           | 2       | 0.0%    |
| Ap-politiker<br>mener det er<br>bedre med flere<br>kulturer og r    |           | 3       | 0.1%    |

# r7pad14\_headlinesRan\_6: Tilfeldig valgt artikkeloverskrift nr. 6. Bakgrunnsvariabel til konjunksjonseksperiment R7PAD14.

| Verdi                                                   | Merkelapp | Enheter | Prosent |
|---------------------------------------------------------|-----------|---------|---------|
| Ap-politiker mener det er bedre med færre kulturer og r |           | 4       | 0.1%    |
| Ap-politiker mener flyktninger bør ha samme rett til so |           | 8       | 0.2%    |
| Ap-politiker mener flyktninger ikke bør ha samme rett t |           | 10      | 0.2%    |
| Ap-politiker møter massiv motstand - vil ikke åpne fler |           | 1       | 0.0%    |
| Ap-politiker møter massiv motstand - vil åpne flere olj |           | 4       | 0.1%    |
| Ap-politiker presenterer forslag: vil nekte privatiseri |           | 1       | 0.0%    |
| Ap-politiker presenterer forslag: vil privatisere NSB   |           | 2       | 0.0%    |
| Ap-politiker på Facebook: «Homofile par MÅ IKKE få like |           | 1       | 0.0%    |
| Ap-politiker på Facebook: «Homofile par MÅ få like rett |           | 3       | 0.1%    |
| Ap-politiker skjelles ut ? mener det er bedre med flere |           | 1       | 0.0%    |
| Ap-politiker skjelles ut ? mener det er bedre med færre |           | 2       | 0.0%    |
| Ap-politiker vil åpne flere oljefelt i nord             |           | 3       | 0.1%    |
| Ap-profil blir hedret etter twittermelding ? vil åpne f |           | 1       | 0.0%    |
| Ap-profil blir latterligjort etter twittermelding ? vil |           | 4       | 0.1%    |

# r7pad14\_headlinesRan\_6: Tilfeldig valgt artikkeloverskrift nr. 6. Bakgrunnsvariabel til konjunksjonseksperiment R7PAD14.

| Verdi                                                               | Merkelapp | Enheter | Prosent |
|---------------------------------------------------------------------|-----------|---------|---------|
| Ap-profil i<br>åpent brev: «jeg<br>vil IKKE at<br>flyktinger ska    |           | 3       | 0.1%    |
| Ap-profil i åpent<br>brev: «jeg vil at<br>flyktinger skal få        |           | 6       | 0.1%    |
| Ap-profil<br>lanserer forslag<br>om flere<br>privatskoler i<br>Norg |           | 1       | 0.0%    |
| Ap-profil<br>lanserer forslag<br>om færre<br>privatskoler i<br>Norg |           | 1       | 0.0%    |
| Ap-profil mener<br>at kommersielle<br>skoler bør forbys             |           | 1       | 0.0%    |
| Ap-profil mener<br>at kommersielle<br>skoler bør<br>tillates        |           | 4       | 0.1%    |
| Ap-profil møter<br>begeistring<br>- mener at<br>kommersielle<br>sko |           | 5       | 0.1%    |
| Ap-profil møter<br>begeistring for<br>forslag om flere<br>privat    |           | 3       | 0.1%    |
| Ap-profil møter<br>begeistring for<br>forslag om færre<br>privat    |           | 3       | 0.1%    |
| Ap-profil møter<br>proteststorm<br>- mener at<br>kommersielle sk    |           | 2       | 0.0%    |
| Ap-profil møter<br>proteststorm for<br>forslag om flere<br>priva    |           | 4       | 0.1%    |
| Ap-profil møter<br>proteststorm for<br>forslag om færre<br>priva    |           | 1       | 0.0%    |
| Ap-profil på<br>twitter: vil<br>stenge for<br>oljeboring i nord     |           | 3       | 0.1%    |
| Ap-profil på<br>twitter: vil åpne<br>for oljeboring i<br>nord       |           | 1       | 0.0%    |

# r7pad14\_headlinesRan\_6: Tilfeldig valgt artikkeloverskrift nr. 6. Bakgrunnsvariabel til konjunksjonseksperiment R7PAD14.

| Verdi                                                             | Merkelapp | Enheter | Prosent |
|-------------------------------------------------------------------|-----------|---------|---------|
| Ap-representant<br>refses ? vil åpne<br>for at noen<br>private s  |           | 4       | 0.1%    |
| Ap-representant<br>roses ? vil sikre<br>at ingen private<br>skol  |           | 2       | 0.0%    |
| Ap-representant<br>roses ? vil åpne<br>for at noen<br>private sk  |           | 3       | 0.1%    |
| Ap-representant<br>vil åpne for at<br>noen private<br>skoler ska  |           | 5       | 0.1%    |
| Ap-topp kjemper<br>for oljeboring<br>i Lofoten - får<br>massiv s  |           | 2       | 0.0%    |
| Ap-topp kjemper<br>for oljeboring i<br>Lofoten - møter<br>massiv  |           | 2       | 0.0%    |
| Ap-topp kjemper<br>mot oljeboring i<br>Lofoten                    |           | 2       | 0.0%    |
| Ap-topp kjemper<br>mot oljeboring<br>i Lofoten - får<br>massiv s  |           | 3       | 0.1%    |
| Ap-topp kjemper<br>mot oljeboring i<br>Lofoten - møter<br>massiv  |           | 2       | 0.0%    |
| Ap-topp mener<br>at skattenivået<br>burde reduseres               |           | 2       | 0.0%    |
| Ap-topp mener<br>at skattenivået<br>ikke burde<br>reduseres       |           | 1       | 0.0%    |
| Ap-topp presser<br>på for å gi<br>NAV-penger til<br>Syriske flyk  |           | 7       | 0.1%    |
| Ap-topp truer<br>med å ta NAV-<br>penger fra<br>Syriske flyktinge |           | 5       | 0.1%    |
| Ap-topp vil gi<br>mer til de rike                                 |           | 2       | 0.0%    |
| Ap-topp vil gi<br>mer til de rike -<br>blir refset                |           | 2       | 0.0%    |
| Ap-topp vil gi<br>mer til de rike -<br>blir roset                 |           | 2       | 0.0%    |

# r7pad14\_headlinesRan\_6: Tilfeldig valgt artikkeloverskrift nr. 6. Bakgrunnsvariabel til konjunksjonseksperiment R7PAD14.

| Verdi                                                    | Merkelapp | Enheter | Prosent |
|----------------------------------------------------------|-----------|---------|---------|
| Ap-topp vil ta mer fra de rike                           |           | 2       | 0.0%    |
| Ap-topp vil ta mer fra de rike - blir refset             |           | 4       | 0.1%    |
| Ap-topp vil ta mer fra de rike - blir roset              |           | 1       | 0.0%    |
| Ap-topp: Vil avskaffe eiendomsskatten i alle norske byer |           | 3       | 0.1%    |
| Ap-topp: Vil innføre eiendomsskatt i alle norske byer.   |           | 2       | 0.0%    |
| Denne restauranten er testet av våre anmeldere           |           | 10      | 0.2%    |
| Denne restauranten må du prøve mener våre anmeldere      |           | 11      | 0.2%    |
| Denne restauranten må du unngå mener våre anmeldere      |           | 11      | 0.2%    |
| Dette er det beste for å gå ned i vekt                   |           | 17      | 0.4%    |
| Dette er det verste for å gå ned i vekt                  |           | 17      | 0.4%    |
| Dette er høstens treningstrend                           |           | 10      | 0.2%    |
| Dette kan du gjøre for å ned i vekt                      |           | 20      | 0.4%    |
| Disse TV-ene er med i vår nye test                       |           | 14      | 0.3%    |
| Disse TV-ene kommer best ut i vår nye test               |           | 10      | 0.2%    |
| Disse TV-ene kommer verst ut i vår nye test              |           | 7       | 0.1%    |
| Flere jubler: Ap-topp mener at skattenivået burde redus  |           | 3       | 0.1%    |
| Flere jubler: Ap-topp mener at skattenivået ikke burde   |           | 3       | 0.1%    |



# r7pad14\_headlinesRan\_6: Tilfeldig valgt artikkeloverskrift nr. 6. Bakgrunnsvariabel til konjunksjonseksperiment R7PAD14.

| Verdi                                                               | Merkelapp | Enheter | Prosent |
|---------------------------------------------------------------------|-----------|---------|---------|
| Flere jubler:<br>Frp-topp mener<br>at skattenivået<br>burde redu    |           | 3       | 0.1%    |
| Flere jubler: Frp-<br>topp mener at<br>skattenivået ikke<br>burde   |           | 1       | 0.0%    |
| Flere jubler:<br>Høyre-topp<br>mener at<br>skattenivået<br>burde re |           | 2       | 0.0%    |
| Flere jubler:<br>Høyre-topp<br>mener at<br>skattenivået ikke<br>bur |           | 3       | 0.1%    |
| Flere jubler:<br>Krf-topp mener<br>at skattenivået<br>burde redu    |           | 1       | 0.0%    |
| Flere jubler: Krf-<br>topp mener at<br>skattenivået ikke<br>burde   |           | 1       | 0.0%    |
| Flere jubler:<br>Mdg-topp mener<br>at skattenivået<br>burde redu    |           | 2       | 0.0%    |
| Flere jubler:<br>Mdg-topp mener<br>at skattenivået<br>ikke burde    |           | 1       | 0.0%    |
| Flere jubler:<br>Rødt-topp mener<br>at skattenivået<br>burde red    |           | 2       | 0.0%    |
| Flere jubler:<br>Rødt-topp mener<br>at skattenivået<br>ikke burd    |           | 1       | 0.0%    |
| Flere jubler:<br>Sp-topp mener<br>at skattenivået<br>burde redus    |           | 1       | 0.0%    |
| Flere jubler:<br>Sv-topp mener<br>at skattenivået<br>burde redus    |           | 1       | 0.0%    |
| Flere jubler: Sv-<br>topp mener at<br>skattenivået ikke<br>burde    |           | 5       | 0.1%    |
| Flere jubler:<br>Venstre-topp<br>mener at<br>skattenivået<br>burde  |           | 1       | 0.0%    |

# r7pad14\_headlinesRan\_6: Tilfeldig valgt artikkeloverskrift nr. 6. Bakgrunnsvariabel til konjunksjonseksperiment R7PAD14.

| Verdi                                                      | Merkelapp | Enheter | Prosent |
|------------------------------------------------------------|-----------|---------|---------|
| Flere jubler:<br>Venstre-topp mener at skattenivået ikke b |           | 3       | 0.1%    |
| Flere stormer:<br>Ap-topp mener at skattenivået burde redu |           | 2       | 0.0%    |
| Flere stormer:<br>Ap-topp mener at skattenivået ikke burde |           | 1       | 0.0%    |
| Flere stormer:<br>Frp-topp mener at skattenivået burde red |           | 1       | 0.0%    |
| Flere stormer:<br>Frp-topp mener at skattenivået ikke burd |           | 2       | 0.0%    |
| Flere stormer:<br>Høyre-topp mener at skattenivået burde r |           | 3       | 0.1%    |
| Flere stormer:<br>Høyre-topp mener at skattenivået ikke bu |           | 3       | 0.1%    |
| Flere stormer:<br>Krf-topp mener at skattenivået burde red |           | 1       | 0.0%    |
| Flere stormer:<br>Krf-topp mener at skattenivået ikke burd |           | 2       | 0.0%    |
| Flere stormer:<br>Mdg-topp mener at skattenivået burde red |           | 3       | 0.1%    |
| Flere stormer:<br>Mdg-topp mener at skattenivået ikke burd |           | 1       | 0.0%    |
| Flere stormer:<br>Rødt-topp mener at skattenivået burde re |           | 2       | 0.0%    |
| Flere stormer:<br>Sp-topp mener at skattenivået burde redu |           | 1       | 0.0%    |
| Flere stormer:<br>Sv-topp mener at skattenivået burde redu |           | 4       | 0.1%    |

# r7pad14\_headlinesRan\_6: Tilfeldig valgt artikkeloverskrift nr. 6. Bakgrunnsvariabel til konjunksjonseksperiment R7PAD14.

| Verdi                                                                | Merkelapp | Enheter | Prosent |
|----------------------------------------------------------------------|-----------|---------|---------|
| Flere stormer:<br>Venstre-topp<br>mener at<br>skattenivået<br>burde  |           | 2       | 0.0%    |
| Flere stormer:<br>Venstre-topp<br>mener at<br>skattenivået ikke      |           | 5       | 0.1%    |
| Foreslår å la<br>kommunen<br>ta seg av<br>eldreomsorgen,<br>ansvarl  |           | 69      | 1.5%    |
| Foreslår å<br>privatisere<br>eldreomsorgen,<br>ansvarlig Ap-<br>poli |           | 8       | 0.2%    |
| Foreslår å<br>privatisere<br>eldreomsorgen,<br>ansvarlig Frp-pol     |           | 7       | 0.1%    |
| Foreslår å<br>privatisere<br>eldreomsorgen,<br>ansvarlig Høyre-<br>p |           | 8       | 0.2%    |
| Foreslår å<br>privatisere<br>eldreomsorgen,<br>ansvarlig Krf-pol     |           | 8       | 0.2%    |
| Foreslår å<br>privatisere<br>eldreomsorgen,<br>ansvarlig Mdg-<br>pol |           | 9       | 0.2%    |
| Foreslår å<br>privatisere<br>eldreomsorgen,<br>ansvarlig Rødt-<br>po |           | 5       | 0.1%    |
| Foreslår å<br>privatisere<br>eldreomsorgen,<br>ansvarlig Sp-poli     |           | 3       | 0.1%    |
| Foreslår å<br>privatisere<br>eldreomsorgen,<br>ansvarlig Sv-poli     |           | 10      | 0.2%    |
| Foreslår å<br>privatisere<br>eldreomsorgen,<br>ansvarlig<br>Venstre  |           | 5       | 0.1%    |
| Forslag fra<br>Ap-topp som<br>vil redusere<br>lønnforskjeller        |           | 1       | 0.0%    |

# r7pad14\_headlinesRan\_6: Tilfeldig valgt artikkeloverskrift nr. 6. Bakgrunnsvariabel til konjunksjonseksperiment R7PAD14.

| Verdi                                                   | Merkelapp | Enheter | Prosent |
|---------------------------------------------------------|-----------|---------|---------|
| Forslag fra Frp-topp som vil redusere lønnsforskjeller  |           | 3       | 0.1%    |
| Forslag fra Frp-topp som vil øke lønnsforskjeller       |           | 1       | 0.0%    |
| Forslag fra Høyre-topp som vil redusere lønnsforskjelle |           | 1       | 0.0%    |
| Forslag fra Høyre-topp som vil øke lønnsforskjeller     |           | 1       | 0.0%    |
| Forslag fra Krf-topp som vil redusere lønnsforskjeller  |           | 2       | 0.0%    |
| Forslag fra Krf-topp som vil øke lønnsforskjeller       |           | 4       | 0.1%    |
| Forslag fra Mdg-topp som vil redusere lønnsforskjeller  |           | 1       | 0.0%    |
| Forslag fra Rødt-topp som vil redusere lønnsforskjeller |           | 2       | 0.0%    |
| Forslag fra Rødt-topp som vil øke lønnsforskjeller      |           | 1       | 0.0%    |
| Forslag fra Sp-topp som vil redusere lønnsforskjeller   |           | 3       | 0.1%    |
| Forslag fra Sp-topp som vil øke lønnsforskjeller        |           | 6       | 0.1%    |
| Forslag fra Sv-topp som vil øke lønnsforskjeller        |           | 1       | 0.0%    |
| Forslag fra Venstre-topp som vil redusere lønnsforskjel |           | 4       | 0.1%    |
| Forslag fra Venstre-topp som vil øke lønnsforskjeller   |           | 1       | 0.0%    |
| Frp-politiker fordømmes etter Facebook-innlegg: «vi tre |           | 4       | 0.1%    |
| Frp-politiker får kjeft for forslag                     |           | 1       | 0.0%    |

# r7pad14\_headlinesRan\_6: Tilfeldig valgt artikkeloverskrift nr. 6. Bakgrunnsvariabel til konjunksjonseksperiment R7PAD14.

| Verdi                                                    | Merkelapp | Enheter | Prosent |
|----------------------------------------------------------|-----------|---------|---------|
| som vil redusere in                                      |           |         |         |
| Frp-politiker får kritikk etter facebook-status: «Homof  |           | 5       | 0.1%    |
| Frp-politiker får massiv støtte - vil ikke åpne flere o  |           | 1       | 0.0%    |
| Frp-politiker får massiv støtte - vil åpne flere oljefe  |           | 2       | 0.0%    |
| Frp-politiker får pepper for forslag: vil nekte privati  |           | 2       | 0.0%    |
| Frp-politiker får pepper for forslag: vil privatisere N  |           | 4       | 0.1%    |
| Frp-politiker får ros etter facebook-status: «Homofile   |           | 5       | 0.1%    |
| Frp-politiker får skryt for forslag som vil redusere in  |           | 2       | 0.0%    |
| Frp-politiker får skryt for forslag som vil øke inntekt  |           | 1       | 0.0%    |
| Frp-politiker får skryt for forslag: vil privatisere NS  |           | 1       | 0.0%    |
| Frp-politiker hudflettes etter homofiendtlig lovforslag  |           | 4       | 0.1%    |
| Frp-politiker hudflettes etter homovenlig lovforslag     |           | 2       | 0.0%    |
| Frp-politiker hudflettes: mener det burde være vanskelig |           | 4       | 0.1%    |
| Frp-politiker hudflettes: mener det ikke burde være van  |           | 2       | 0.0%    |
| Frp-politiker hylles ? mener det er bedre med flere kul  |           | 3       | 0.1%    |

# r7pad14\_headlinesRan\_6: Tilfeldig valgt artikkeloverskrift nr. 6. Bakgrunnsvariabel til konjunksjonseksperiment R7PAD14.

| Verdi                                                               | Merkelapp | Enheter | Prosent |
|---------------------------------------------------------------------|-----------|---------|---------|
| Frp-politiker<br>hylles ? mener<br>det er bedre med<br>færre kul    |           | 1       | 0.0%    |
| Frp-politiker<br>lovprises etter<br>Facebook-<br>innlegg: «vi tre   |           | 4       | 0.1%    |
| Frp-politiker<br>lovprises etter<br>homofiendtlig<br>lovforslag     |           | 4       | 0.1%    |
| Frp-politiker<br>lovprises: mener<br>det burde være<br>vanskelig    |           | 3       | 0.1%    |
| Frp-politiker<br>lovprises: mener<br>det ikke burde<br>være vans    |           | 1       | 0.0%    |
| Frp-politiker<br>med Facebook-<br>innlegg: «vi<br>trenger flere m   |           | 2       | 0.0%    |
| Frp-politiker<br>med Facebook-<br>innlegg: «vi<br>trenger ikke fl   |           | 2       | 0.0%    |
| Frp-politiker<br>med forslag<br>som vil redusere<br>inntektsfors    |           | 6       | 0.1%    |
| Frp-politiker<br>med forslag<br>som vil øke<br>inntektsforskjell    |           | 2       | 0.0%    |
| Frp-<br>politiker med<br>homovennlig<br>lovforslag                  |           | 4       | 0.1%    |
| Frp-politiker<br>mener alle<br>offentlige<br>aktiviteter ikke<br>ka |           | 6       | 0.1%    |
| Frp-politiker<br>mener alle<br>offentlige<br>aktiviteter kan<br>gjø |           | 2       | 0.0%    |
| Frp-politiker<br>mener det<br>burde være<br>vanskeligere for<br>hom |           | 2       | 0.0%    |
| Frp-politiker<br>mener det er<br>bedre med flere<br>kulturer og     |           | 2       | 0.0%    |

# r7pad14\_headlinesRan\_6: Tilfeldig valgt artikkeloverskrift nr. 6. Bakgrunnsvariabel til konjunksjonseksperiment R7PAD14.

| Verdi                                                    | Merkelapp | Enheter | Prosent |
|----------------------------------------------------------|-----------|---------|---------|
| Frp-politiker mener det er bedre med færre kulturer og   |           | 1       | 0.0%    |
| Frp-politiker mener det ikke burde være vanskeligere fo  |           | 2       | 0.0%    |
| Frp-politiker mener flyktninger bør ha samme rett til s  |           | 6       | 0.1%    |
| Frp-politiker mener flyktninger ikke bør ha samme rett   |           | 5       | 0.1%    |
| Frp-politiker møter massiv motstand - vil ikke åpne fle  |           | 3       | 0.1%    |
| Frp-politiker møter massiv motstand - vil åpne flere ol  |           | 4       | 0.1%    |
| Frp-politiker presenterer forslag: vil nekte privatiser  |           | 1       | 0.0%    |
| Frp-politiker presenterer forslag: vil privatisere NSB   |           | 2       | 0.0%    |
| Frp-politiker på Facebook: «Homofile par MÅ IKKE få lik  |           | 3       | 0.1%    |
| Frp-politiker på Facebook: «Homofile par MÅ få like ret  |           | 4       | 0.1%    |
| Frp-politiker skjelles ut ? mener det er bedre med fler  |           | 1       | 0.0%    |
| Frp-politiker skjelles ut ? mener det er bedre med færre |           | 4       | 0.1%    |
| Frp-politiker vil ikke åpne flere oljefelt i nord        |           | 2       | 0.0%    |
| Frp-politiker vil åpne flere oljefelt i nord             |           | 3       | 0.1%    |
| Frp-profil blir hedret etter                             |           | 3       | 0.1%    |

# r7pad14\_headlinesRan\_6: Tilfeldig valgt artikkeloverskrift nr. 6. Bakgrunnsvariabel til konjunksjonseksperiment R7PAD14.

| Verdi                                                    | Merkelapp | Enheter | Prosent |
|----------------------------------------------------------|-----------|---------|---------|
| twittermelding ? vil steng                               |           |         |         |
| Frp-profil blir latterliggjort etter twittermelding ? vi |           | 2       | 0.0%    |
| Frp-profil i åpent brev: «jeg vil IKKE at flyktinger sk  |           | 8       | 0.2%    |
| Frp-profil i åpent brev: «jeg vil at flyktinger skal få  |           | 5       | 0.1%    |
| Frp-profil lanserer forslag om flere privatskoler i Nor  |           | 5       | 0.1%    |
| Frp-profil lanserer forslag om færre privatskoler i Nor  |           | 3       | 0.1%    |
| Frp-profil mener at kommersielle skoler bør forbys       |           | 3       | 0.1%    |
| Frp-profil møter begeistring - mener at kommersielle sk  |           | 2       | 0.0%    |
| Frp-profil møter begeistring for forslag om flere priva  |           | 4       | 0.1%    |
| Frp-profil møter begeistring for forslag om færre priva  |           | 2       | 0.0%    |
| Frp-profil møter proteststorm - mener at kommersielle s  |           | 5       | 0.1%    |
| Frp-profil møter proteststorm for forslag om flere priv  |           | 1       | 0.0%    |
| Frp-profil møter proteststorm for forslag om færre priv  |           | 2       | 0.0%    |
| Frp-profil på twitter: vil stenge for oljeboring i nord  |           | 1       | 0.0%    |
| Frp-profil på twitter: vil åpne for oljeboring i nord    |           | 2       | 0.0%    |



# r7pad14\_headlinesRan\_6: Tilfeldig valgt artikkeloverskrift nr. 6. Bakgrunnsvariabel til konjunksjonseksperiment R7PAD14.

| Verdi                                                               | Merkelapp | Enheter | Prosent |
|---------------------------------------------------------------------|-----------|---------|---------|
| Frp-representant<br>refses ? vil sikre<br>at ingen private<br>sk    |           | 1       | 0.0%    |
| Frp-representant<br>roses ? vil åpne<br>for at noen<br>private s    |           | 1       | 0.0%    |
| Frp-representant<br>vil sikre at ingen<br>private skoler<br>skal    |           | 2       | 0.0%    |
| Frp-representant<br>vil åpne for at<br>noen private<br>skoler sk    |           | 4       | 0.1%    |
| Frp-topp<br>kjemper for<br>oljeboring i<br>Lofoten                  |           | 3       | 0.1%    |
| Frp-topp<br>kjemper for<br>oljeboring i<br>Lofoten - får<br>massiv  |           | 3       | 0.1%    |
| Frp-topp<br>kjemper for<br>oljeboring i<br>Lofoten - møter<br>massi |           | 2       | 0.0%    |
| Frp-topp<br>kjemper mot<br>oljeboring i<br>Lofoten                  |           | 1       | 0.0%    |
| Frp-topp<br>kjemper mot<br>oljeboring i<br>Lofoten - får<br>massiv  |           | 2       | 0.0%    |
| Frp-topp mener<br>at skattenivået<br>burde reduseres                |           | 3       | 0.1%    |
| Frp-topp mener<br>at skattenivået<br>ikke burde<br>reduseres        |           | 4       | 0.1%    |
| Frp-topp presser<br>på for å gi<br>NAV-penger til<br>Syriske fly    |           | 10      | 0.2%    |
| Frp-topp truer<br>med å ta NAV-<br>penger fra<br>Syriske flykting   |           | 8       | 0.2%    |
| Frp-topp vil gi<br>mer til de rike                                  |           | 1       | 0.0%    |

# r7pad14\_headlinesRan\_6: Tilfeldig valgt artikkeloverskrift nr. 6. Bakgrunnsvariabel til konjunksjonseksperiment R7PAD14.

| Verdi                                                   | Merkelapp | Enheter | Prosent |
|---------------------------------------------------------|-----------|---------|---------|
| Frp-topp vil gi mer til de rike - blir refset           |           | 2       | 0.0%    |
| Frp-topp vil gi mer til de rike - blir roset            |           | 3       | 0.1%    |
| Frp-topp vil ta mer fra de rike - blir refset           |           | 1       | 0.0%    |
| Frp-topp vil ta mer fra de rike - blir roset            |           | 1       | 0.0%    |
| Frp-topp: Vil avskaffe eiendomsskatten i alle norske by |           | 3       | 0.1%    |
| Frp-topp: Vil innføre eiendomsskatt i alle norske byer. |           | 1       | 0.0%    |
| Helgens konsert                                         |           | 13      | 0.3%    |
| Her er helgens filmer                                   |           | 21      | 0.4%    |
| Her er helgens filmer du bør se                         |           | 9       | 0.2%    |
| Her er helgens filmer du bør unngå                      |           | 15      | 0.3%    |
| Her er vinterens beste smarttelefoner                   |           | 13      | 0.3%    |
| Her er vinterens smarttelefoner                         |           | 13      | 0.3%    |
| Her er vinterens verste smarttelefoner                  |           | 16      | 0.3%    |
| Her går konserten fryktelig galt                        |           | 16      | 0.3%    |
| Her går konserten skikkelig bra                         |           | 9       | 0.2%    |
| Høyre-politiker fordømmes etter Facebook-innlegg: «vi t |           | 2       | 0.0%    |
| Høyre-politiker får kjeft for forslag som vil redusere  |           | 1       | 0.0%    |
| Høyre-politiker får kritikk etter facebook-status: «Hom |           | 5       | 0.1%    |
| Høyre-politiker får massiv støtte                       |           | 3       | 0.1%    |

# r7pad14\_headlinesRan\_6: Tilfeldig valgt artikkeloverskrift nr. 6. Bakgrunnsvariabel til konjunksjonseksperiment R7PAD14.

| Verdi                                                      | Merkelapp | Enheter | Prosent |
|------------------------------------------------------------|-----------|---------|---------|
| - vil ikke åpne flere                                      |           |         |         |
| Høyre-politiker får massiv støtte<br>- vil åpne flere olje |           | 2       | 0.0%    |
| Høyre-politiker får pepper for forslag: vil nekte priva    |           | 1       | 0.0%    |
| Høyre-politiker får pepper for forslag: vil privatisere    |           | 1       | 0.0%    |
| Høyre-politiker får ros etter facebook-status: «Homofil    |           | 3       | 0.1%    |
| Høyre-politiker får skryt for forslag som vil øke innte    |           | 4       | 0.1%    |
| Høyre-politiker får skryt for forslag: vil privatisere     |           | 2       | 0.0%    |
| Høyre-politiker hudflettes etter homofiendtlig lovforsl    |           | 1       | 0.0%    |
| Høyre-politiker hudflettes etter homovenntlig lovforslag   |           | 3       | 0.1%    |
| Høyre-politiker hudflettes: mener det burde være vanske    |           | 3       | 0.1%    |
| Høyre-politiker hudflettes: mener det ikke burde være v    |           | 4       | 0.1%    |
| Høyre-politiker hylles ? mener det er bedre med flere k    |           | 1       | 0.0%    |
| Høyre-politiker hylles ? mener det er bedre med færre k    |           | 2       | 0.0%    |
| Høyre-politiker lovprises etter Facebook-innlegg: «vi t    |           | 4       | 0.1%    |
| Høyre-politiker lovprises etter homofiendtlig lovforsla    |           | 1       | 0.0%    |

# r7pad14\_headlinesRan\_6: Tilfeldig valgt artikkeloverskrift nr. 6. Bakgrunnsvariabel til konjunksjonseksperiment R7PAD14.

| Verdi                                                     | Merkelapp | Enheter | Prosent |
|-----------------------------------------------------------|-----------|---------|---------|
| Høyre-politiker lovprises: mener det burde være vanskelig |           | 4       | 0.1%    |
| Høyre-politiker lovprises: mener det ikke burde være va   |           | 2       | 0.0%    |
| Høyre-politiker med Facebook-innlegg: «vi trenger flere   |           | 4       | 0.1%    |
| Høyre-politiker med Facebook-innlegg: «vi trenger ikke    |           | 3       | 0.1%    |
| Høyre-politiker med forslag som vil redusere inntektsfo   |           | 1       | 0.0%    |
| Høyre-politiker med homofiendtlig lovforslag              |           | 2       | 0.0%    |
| Høyre-politiker med homovenlig lovforslag                 |           | 4       | 0.1%    |
| Høyre-politiker mener alle offentlige aktiviteter ikke    |           | 8       | 0.2%    |
| Høyre-politiker mener alle offentlige aktiviteter kan g   |           | 5       | 0.1%    |
| Høyre-politiker mener det burde være vanskeligere for h   |           | 2       | 0.0%    |
| Høyre-politiker mener det er bedre med færre kulturer o   |           | 4       | 0.1%    |
| Høyre-politiker mener flyktninger bør ha samme rett til   |           | 4       | 0.1%    |
| Høyre-politiker mener flyktninger ikke bør ha samme ret   |           | 5       | 0.1%    |
| Høyre-politiker møter massiv motstand - vil ikke åpne f   |           | 1       | 0.0%    |

# r7pad14\_headlinesRan\_6: Tilfeldig valgt artikkeloverskrift nr. 6. Bakgrunnsvariabel til konjunksjonseksperiment R7PAD14.

| Verdi                                                   | Merkelapp | Enheter | Prosent |
|---------------------------------------------------------|-----------|---------|---------|
| Høyre-politiker møter massiv motstand - vil åpne flere  |           | 1       | 0.0%    |
| Høyre-politiker presenterer forslag: vil privatisere NS |           | 4       | 0.1%    |
| Høyre-politiker på Facebook: «Homofile par MÅ IKKE få l |           | 2       | 0.0%    |
| Høyre-politiker på Facebook: «Homofile par MÅ få like r |           | 1       | 0.0%    |
| Høyre-politiker skjelles ut ? mener det er bedre med fl |           | 3       | 0.1%    |
| Høyre-politiker skjelles ut ? mener det er bedre med fæ |           | 4       | 0.1%    |
| Høyre-politiker vil ikke åpne flere oljefelt i nord     |           | 1       | 0.0%    |
| Høyre-politiker vil åpne flere oljefelt i nord          |           | 3       | 0.1%    |
| Høyre-profil blir hedret etter twittermelding ? vil ste |           | 1       | 0.0%    |
| Høyre-profil blir hedret etter twittermelding ? vil åpn |           | 2       | 0.0%    |
| Høyre-profil blir latterligjort etter twittermelding ?  |           | 1       | 0.0%    |
| Høyre-profil i åpent brev: «jeg vil IKKE at flyktinger  |           | 4       | 0.1%    |
| Høyre-profil i åpent brev: «jeg vil at flyktinger skal  |           | 9       | 0.2%    |
| Høyre-profil lanserer forslag om flere privatskoler i N |           | 2       | 0.0%    |
| Høyre-profil lanserer forslag om færre privatskoler i N |           | 2       | 0.0%    |

# r7pad14\_headlinesRan\_6: Tilfeldig valgt artikkeloverskrift nr. 6. Bakgrunnsvariabel til konjunksjonseksperiment R7PAD14.

| Verdi                                                   | Merkelapp | Enheter | Prosent |
|---------------------------------------------------------|-----------|---------|---------|
| Høyre-profil mener at kommersielle skoler bør forbys    |           | 2       | 0.0%    |
| Høyre-profil mener at kommersielle skoler bør tillates  |           | 2       | 0.0%    |
| Høyre-profil møter begeistring - mener at kommersielle  |           | 7       | 0.1%    |
| Høyre-profil møter begeistring for forslag om flere pri |           | 3       | 0.1%    |
| Høyre-profil møter proteststorm - mener at kommersielle |           | 7       | 0.1%    |
| Høyre-profil møter proteststorm for forslag om flere pr |           | 2       | 0.0%    |
| Høyre-profil møter proteststorm for forslag om færre pr |           | 2       | 0.0%    |
| Høyre-profil på twitter: vil stenge for oljeboring i no |           | 1       | 0.0%    |
| Høyre-representant refsas ? vil sikre at ingen private  |           | 5       | 0.1%    |
| Høyre-representant refsas ? vil åpne for at noen privat |           | 1       | 0.0%    |
| Høyre-representant roses ? vil sikre at ingen private s |           | 4       | 0.1%    |
| Høyre-representant vil sikre at ingen private skoler sk |           | 1       | 0.0%    |
| Høyre-representant vil åpne for at noen private skoler  |           | 2       | 0.0%    |

# r7pad14\_headlinesRan\_6: Tilfeldig valgt artikkeloverskrift nr. 6. Bakgrunnsvariabel til konjunksjonseksperiment R7PAD14.

| Verdi                                                   | Merkelapp | Enheter | Prosent |
|---------------------------------------------------------|-----------|---------|---------|
| Høyre-topp kjemper for oljeboring i Lofoten             |           | 2       | 0.0%    |
| Høyre-topp kjemper for oljeboring i Lofoten - får massi |           | 4       | 0.1%    |
| Høyre-topp kjemper for oljeboring i Lofoten - møter mas |           | 5       | 0.1%    |
| Høyre-topp kjemper mot oljeboring i Lofoten             |           | 4       | 0.1%    |
| Høyre-topp kjemper mot oljeboring i Lofoten - møter mas |           | 2       | 0.0%    |
| Høyre-topp mener at skattenivået burde reduseres        |           | 2       | 0.0%    |
| Høyre-topp mener at skattenivået ikke burde reduseres   |           | 1       | 0.0%    |
| Høyre-topp presser på for å gi NAV-penger til Syriske f |           | 5       | 0.1%    |
| Høyre-topp truer med å ta NAV-penger fra Syriske flykti |           | 5       | 0.1%    |
| Høyre-topp vil gi mer til de rike                       |           | 2       | 0.0%    |
| Høyre-topp vil gi mer til de rike - blir roset          |           | 2       | 0.0%    |
| Høyre-topp vil ta mer fra de rike                       |           | 1       | 0.0%    |
| Høyre-topp vil ta mer fra de rike - blir refset         |           | 2       | 0.0%    |
| Høyre-topp vil ta mer fra de rike - blir roset          |           | 3       | 0.1%    |
| Høyre-topp: Vil avskaffe eiendomsskatten i alle norske  |           | 2       | 0.0%    |
| Høyre-topp: Vil innføre                                 |           | 2       | 0.0%    |

# r7pad14\_headlinesRan\_6: Tilfeldig valgt artikkeloverskrift nr. 6. Bakgrunnsvariabel til konjunksjonseksperiment R7PAD14.

| Verdi                                                   | Merkelapp | Enheter | Prosent |
|---------------------------------------------------------|-----------|---------|---------|
| eiendomsskatt i alle norske byer                        |           |         |         |
| Jubler for Ap-topp: Vil avskaffe eiendomsskatten i alle |           | 1       | 0.0%    |
| Jubler for Ap-topp: Vil innføre eiendomsskatt i alle no |           | 1       | 0.0%    |
| Jubler for Frp-topp: Vil avskaffe eiendomsskatten i all |           | 2       | 0.0%    |
| Jubler for Frp-topp: Vil innføre eiendomsskatt i alle n |           | 3       | 0.1%    |
| Jubler for Høyre-topp: Vil avskaffe eiendomsskatten i a |           | 3       | 0.1%    |
| Jubler for Mdg-topp: Vil avskaffe eiendomsskatten i all |           | 3       | 0.1%    |
| Jubler for Mdg-topp: Vil innføre eiendomsskatt i alle n |           | 3       | 0.1%    |
| Jubler for Rødt-topp: Vil avskaffe eiendomsskatten i al |           | 3       | 0.1%    |
| Jubler for Rødt-topp: Vil innføre eiendomsskatt i alle  |           | 2       | 0.0%    |
| Jubler for Sp-topp: Vil avskaffe eiendomsskatten i alle |           | 1       | 0.0%    |
| Jubler for Sv-topp: Vil avskaffe eiendomsskatten i alle |           | 2       | 0.0%    |
| Jubler for Sv-topp: Vil innføre eiendomsskatt i alle no |           | 1       | 0.0%    |
| Jubler for Venstre-topp:                                |           | 1       | 0.0%    |



# r7pad14\_headlinesRan\_6: Tilfeldig valgt artikkeloverskrift nr. 6. Bakgrunnsvariabel til konjunksjonseksperiment R7PAD14.

| Verdi                                                   | Merkelapp | Enheter | Prosent |
|---------------------------------------------------------|-----------|---------|---------|
| Vil avskaffe eiendomsskatten i                          |           |         |         |
| Jubler for Venstre-topp: Vil innføre eiendomsskatt i al |           | 1       | 0.0%    |
| Kjendisfesten ble holdt i går                           |           | 10      | 0.2%    |
| Kjendisfesten gikk skikkelig galt                       |           | 10      | 0.2%    |
| Kjendisfesten var en stor suksess                       |           | 14      | 0.3%    |
| Krf-politiker fordømmes etter Facebook-innlegg: «vi tre |           | 2       | 0.0%    |
| Krf-politiker får kjeft for forslag som vil øke inntekt |           | 1       | 0.0%    |
| Krf-politiker får kritikk etter facebook-status: «Homof |           | 5       | 0.1%    |
| Krf-politiker får massiv støtte - vil ikke åpne flere o |           | 1       | 0.0%    |
| Krf-politiker får massiv støtte - vil åpne flere oljefe |           | 2       | 0.0%    |
| Krf-politiker får pepper for forslag: vil nekte privati |           | 1       | 0.0%    |
| Krf-politiker får pepper for forslag: vil privatisere N |           | 2       | 0.0%    |
| Krf-politiker får ros etter facebook-status: «Homofile  |           | 8       | 0.2%    |
| Krf-politiker får skryt for forslag som vil redusere in |           | 4       | 0.1%    |
| Krf-politiker får skryt for forslag som vil øke inntekt |           | 4       | 0.1%    |

# r7pad14\_headlinesRan\_6: Tilfeldig valgt artikkeloverskrift nr. 6. Bakgrunnsvariabel til konjunksjonseksperiment R7PAD14.

| Verdi                                                    | Merkelapp | Enheter | Prosent |
|----------------------------------------------------------|-----------|---------|---------|
| Krf-politiker får skryt for forslag: vil nekte privatis  |           | 3       | 0.1%    |
| Krf-politiker får skryt for forslag: vil privatisere NS  |           | 3       | 0.1%    |
| Krf-politiker hudflettes etter homofiendtlig lovforslag  |           | 4       | 0.1%    |
| Krf-politiker hudflettes etter homovennlig lovforslag    |           | 1       | 0.0%    |
| Krf-politiker hudflettes: mener det burde være vanskelig |           | 1       | 0.0%    |
| Krf-politiker hudflettes: mener det ikke burde være van  |           | 2       | 0.0%    |
| Krf-politiker hylles ? mener det er bedre med flere kul  |           | 3       | 0.1%    |
| Krf-politiker hylles ? mener det er bedre med færre kul  |           | 1       | 0.0%    |
| Krf-politiker lovprises etter Facebook-innlegg: «vi tre  |           | 4       | 0.1%    |
| Krf-politiker lovprises etter homofiendtlig lovforslag   |           | 3       | 0.1%    |
| Krf-politiker lovprises etter homovennlig lovforslag     |           | 2       | 0.0%    |
| Krf-politiker lovprises: mener det ikke burde være vans  |           | 3       | 0.1%    |
| Krf-politiker med Facebook-innlegg: «vi trenger flere m  |           | 1       | 0.0%    |
| Krf-politiker med forslag som vil redusere inntektsfors  |           | 1       | 0.0%    |
| Krf-politiker med forslag                                |           | 3       | 0.1%    |

# r7pad14\_headlinesRan\_6: Tilfeldig valgt artikkeloverskrift nr. 6. Bakgrunnsvariabel til konjunksjonseksperiment R7PAD14.

| Verdi                                                   | Merkelapp | Enheter | Prosent |
|---------------------------------------------------------|-----------|---------|---------|
| som vil øke inntektsforskjell                           |           |         |         |
| Krf-politiker med homofiendtlig lovforslag              |           | 3       | 0.1%    |
| Krf-politiker med homovenkelig lovforslag               |           | 5       | 0.1%    |
| Krf-politiker mener alle offentlige aktiviteter ikke ka |           | 6       | 0.1%    |
| Krf-politiker mener alle offentlige aktiviteter kan gjø |           | 6       | 0.1%    |
| Krf-politiker mener det burde være vanskeligere for hom |           | 2       | 0.0%    |
| Krf-politiker mener det er bedre med flere kulturer og  |           | 2       | 0.0%    |
| Krf-politiker mener det er bedre med færre kulturer og  |           | 1       | 0.0%    |
| Krf-politiker mener det ikke burde være vanskeligere fo |           | 1       | 0.0%    |
| Krf-politiker mener flyktninger bør ha samme rett til s |           | 7       | 0.1%    |
| Krf-politiker mener flyktninger ikke bør ha samme rett  |           | 8       | 0.2%    |
| Krf-politiker møter massiv motstand - vil ikke åpne fle |           | 2       | 0.0%    |
| Krf-politiker møter massiv motstand - vil åpne flere ol |           | 4       | 0.1%    |
| Krf-politiker presenterer forslag: vil privatisere NSB  |           | 1       | 0.0%    |

# r7pad14\_headlinesRan\_6: Tilfeldig valgt artikkeloverskrift nr. 6. Bakgrunnsvariabel til konjunksjonseksperiment R7PAD14.

| Verdi                                                    | Merkelapp | Enheter | Prosent |
|----------------------------------------------------------|-----------|---------|---------|
| Krf-politiker på Facebook: «Homofile par MÅ IKKE få lik  |           | 4       | 0.1%    |
| Krf-politiker på Facebook: «Homofile par MÅ få like ret  |           | 2       | 0.0%    |
| Krf-politiker skjelles ut ? mener det er bedre med færre |           | 2       | 0.0%    |
| Krf-politiker vil ikke åpne flere oljefelt i nord        |           | 1       | 0.0%    |
| Krf-politiker vil åpne flere oljefelt i nord             |           | 1       | 0.0%    |
| Krf-profil blir hedret etter twittermelding ? vil steng  |           | 1       | 0.0%    |
| Krf-profil blir hedret etter twittermelding ? vil åpne   |           | 1       | 0.0%    |
| Krf-profil blir latterliggjort etter twittermelding ? vi |           | 6       | 0.1%    |
| Krf-profil i åpent brev: «jeg vil IKKE at flyktinger sk  |           | 2       | 0.0%    |
| Krf-profil i åpent brev: «jeg vil at flyktinger skal få  |           | 4       | 0.1%    |
| Krf-profil lanserer forslag om flere privatskoler i Nor  |           | 1       | 0.0%    |
| Krf-profil lanserer forslag om færre privatskoler i Nor  |           | 1       | 0.0%    |
| Krf-profil mener at kommersielle skoler bør forbys       |           | 2       | 0.0%    |
| Krf-profil mener at kommersielle skoler bør tillates     |           | 2       | 0.0%    |
| Krf-profil møter begeistring - mener at kommersielle sk  |           | 2       | 0.0%    |

# r7pad14\_headlinesRan\_6: Tilfeldig valgt artikkeloverskrift nr. 6. Bakgrunnsvariabel til konjunksjonseksperiment R7PAD14.

| Verdi                                                   | Merkelapp | Enheter | Prosent |
|---------------------------------------------------------|-----------|---------|---------|
| Krf-profil møter begeistring for forslag om flere priva |           | 1       | 0.0%    |
| Krf-profil møter begeistring for forslag om færre priva |           | 1       | 0.0%    |
| Krf-profil møter proteststorm - mener at kommersielle s |           | 2       | 0.0%    |
| Krf-profil møter proteststorm for forslag om flere priv |           | 3       | 0.1%    |
| Krf-profil møter proteststorm for forslag om færre priv |           | 1       | 0.0%    |
| Krf-profil på twitter: vil stenge for oljeboring i nord |           | 3       | 0.1%    |
| Krf-profil på twitter: vil åpne for oljeboring i nord   |           | 2       | 0.0%    |
| Krf-representant refses ? vil sikre at ingen private sk |           | 3       | 0.1%    |
| Krf-representant refses ? vil åpne for at noen private  |           | 4       | 0.1%    |
| Krf-representant roses ? vil sikre at ingen private sko |           | 1       | 0.0%    |
| Krf-representant roses ? vil åpne for at noen private s |           | 1       | 0.0%    |
| Krf-representant vil sikre at ingen private skoler skal |           | 1       | 0.0%    |
| Krf-representant vil åpne for at noen private skoler sk |           | 2       | 0.0%    |
| Krf-topp kjemper for oljeboring i Lofoten               |           | 3       | 0.1%    |
| Krf-topp kjemper for                                    |           | 2       | 0.0%    |

# r7pad14\_headlinesRan\_6: Tilfeldig valgt artikkeloverskrift nr. 6. Bakgrunnsvariabel til konjunksjonseksperiment R7PAD14.

| Verdi                                                   | Merkelapp | Enheter | Prosent |
|---------------------------------------------------------|-----------|---------|---------|
| oljeboring i Lofoten - får massiv                       |           |         |         |
| Krf-topp kjemper for oljeboring i Lofoten - møter massi |           | 2       | 0.0%    |
| Krf-topp kjemper mot oljeboring i Lofoten               |           | 1       | 0.0%    |
| Krf-topp kjemper mot oljeboring i Lofoten - får massiv  |           | 2       | 0.0%    |
| Krf-topp kjemper mot oljeboring i Lofoten - møter massi |           | 2       | 0.0%    |
| Krf-topp mener at skattenivået ikke burde reduseres     |           | 2       | 0.0%    |
| Krf-topp presser på for å gi NAV-penger til Syriske fly |           | 4       | 0.1%    |
| Krf-topp truer med å ta NAV-penger fra Syriske flykting |           | 2       | 0.0%    |
| Krf-topp vil gi mer til de rike                         |           | 1       | 0.0%    |
| Krf-topp vil gi mer til de rike - blir refset           |           | 1       | 0.0%    |
| Krf-topp vil ta mer fra de rike                         |           | 6       | 0.1%    |
| Krf-topp vil ta mer fra de rike - blir refset           |           | 3       | 0.1%    |
| Krf-topp vil ta mer fra de rike - blir roset            |           | 3       | 0.1%    |
| Krf-topp: Vil avskaffe eiendomsskatten i alle norske by |           | 1       | 0.0%    |
| Krf-topp: Vil innføre eiendomsskatt i alle norske byer. |           | 2       | 0.0%    |
| Lokal Ap-politiker ? vil                                |           | 1       | 0.0%    |

# r7pad14\_headlinesRan\_6: Tilfeldig valgt artikkeloverskrift nr. 6. Bakgrunnsvariabel til konjunksjonseksperiment R7PAD14.

| Verdi                                                   | Merkelapp | Enheter | Prosent |
|---------------------------------------------------------|-----------|---------|---------|
| hindre at vi tar imot 5000 nye                          |           |         |         |
| Lokal Ap-politiker ? vil ta imot 5000 nye flyktninger   |           | 2       | 0.0%    |
| Lokal Ap-politiker hylles ? vil hindre at vi tar imot 5 |           | 2       | 0.0%    |
| Lokal Ap-politiker hylles ? vil ta imot 5000 nye flyktn |           | 7       | 0.1%    |
| Lokal Ap-politiker skjelles ut ? vil hindre at vi tar i |           | 1       | 0.0%    |
| Lokal Ap-politiker skjelles ut ? vil ta imot 5000 nye f |           | 1       | 0.0%    |
| Lokal Frp-politiker ? vil hindre at vi tar imot 5000 ny |           | 3       | 0.1%    |
| Lokal Frp-politiker ? vil ta imot 5000 nye flyktninger  |           | 2       | 0.0%    |
| Lokal Frp-politiker hylles ? vil ta imot 5000 nye flykt |           | 2       | 0.0%    |
| Lokal Frp-politiker skjelles ut ? vil hindre at vi tar  |           | 5       | 0.1%    |
| Lokal Frp-politiker skjelles ut ? vil ta imot 5000 nye  |           | 3       | 0.1%    |
| Lokal Høyre-politiker ? vil hindre at vi tar imot 5000  |           | 5       | 0.1%    |
| Lokal Høyre-politiker ? vil ta imot 5000 nye flyktninge |           | 3       | 0.1%    |
| Lokal Høyre-politiker hylles ? vil hindre at vi tar imo |           | 2       | 0.0%    |
| Lokal Høyre-politiker hylles ? vil ta imot 5000 nye fly |           | 2       | 0.0%    |

# r7pad14\_headlinesRan\_6: Tilfeldig valgt artikkeloverskrift nr. 6. Bakgrunnsvariabel til konjunksjonseksperiment R7PAD14.

| Verdi                                                   | Merkelapp | Enheter | Prosent |
|---------------------------------------------------------|-----------|---------|---------|
| Lokal Høyre-politiker skjelles ut ? vil hindre at vi ta |           | 2       | 0.0%    |
| Lokal Høyre-politiker skjelles ut ? vil ta imot 5000 ny |           | 1       | 0.0%    |
| Lokal Krf-politiker ? vil hindre at vi tar imot 5000 ny |           | 2       | 0.0%    |
| Lokal Krf-politiker ? vil ta imot 5000 nye flyktninger  |           | 2       | 0.0%    |
| Lokal Krf-politiker hylles ? vil hindre at vi tar imot  |           | 1       | 0.0%    |
| Lokal Krf-politiker hylles ? vil ta imot 5000 nye flykt |           | 1       | 0.0%    |
| Lokal Krf-politiker skjelles ut ? vil hindre at vi tar  |           | 2       | 0.0%    |
| Lokal Krf-politiker skjelles ut ? vil ta imot 5000 nye  |           | 2       | 0.0%    |
| Lokal Mdg-politiker ? vil hindre at vi tar imot 5000 ny |           | 3       | 0.1%    |
| Lokal Mdg-politiker ? vil ta imot 5000 nye flyktninger  |           | 3       | 0.1%    |
| Lokal Mdg-politiker hylles ? vil ta imot 5000 nye flykt |           | 3       | 0.1%    |
| Lokal Mdg-politiker skjelles ut ? vil hindre at vi tar  |           | 2       | 0.0%    |
| Lokal Rødt-politiker ? vil hindre at vi tar imot 5000 n |           | 1       | 0.0%    |
| Lokal Rødt-politiker ? vil ta imot 5000 nye flyktninger |           | 1       | 0.0%    |
| Lokal Rødt-politiker hylles ?                           |           | 4       | 0.1%    |



# r7pad14\_headlinesRan\_6: Tilfeldig valgt artikkeloverskrift nr. 6. Bakgrunnsvariabel til konjunksjonseksperiment R7PAD14.

| Verdi                                                   | Merkelapp | Enheter | Prosent |
|---------------------------------------------------------|-----------|---------|---------|
| vil hindre at vi tar imot                               |           |         |         |
| Lokal Rødt-politiker hylles ? vil ta imot 5000 nye flyk |           | 2       | 0.0%    |
| Lokal Rødt-politiker skjelles ut ? vil hindre at vi tar |           | 2       | 0.0%    |
| Lokal Sp-politiker ? vil hindre at vi tar imot 5000 nye |           | 2       | 0.0%    |
| Lokal Sp-politiker ? vil ta imot 5000 nye flyktninger   |           | 1       | 0.0%    |
| Lokal Sp-politiker hylles ? vil hindre at vi tar imot 5 |           | 2       | 0.0%    |
| Lokal Sp-politiker hylles ? vil ta imot 5000 nye flyktn |           | 2       | 0.0%    |
| Lokal Sp-politiker skjelles ut ? vil hindre at vi tar i |           | 1       | 0.0%    |
| Lokal Sp-politiker skjelles ut ? vil ta imot 5000 nye f |           | 1       | 0.0%    |
| Lokal Sv-politiker ? vil ta imot 5000 nye flyktninger   |           | 5       | 0.1%    |
| Lokal Sv-politiker hylles ? vil hindre at vi tar imot 5 |           | 4       | 0.1%    |
| Lokal Sv-politiker hylles ? vil ta imot 5000 nye flyktn |           | 3       | 0.1%    |
| Lokal Sv-politiker skjelles ut ? vil hindre at vi tar i |           | 2       | 0.0%    |
| Lokal Sv-politiker skjelles ut ? vil ta imot 5000 nye f |           | 4       | 0.1%    |
| Lokal Venstre-politiker ? vil hindre at vi tar imot 500 |           | 4       | 0.1%    |

# r7pad14\_headlinesRan\_6: Tilfeldig valgt artikkeloverskrift nr. 6. Bakgrunnsvariabel til konjunksjonseksperiment R7PAD14.

| Verdi                                                   | Merkelapp | Enheter | Prosent |
|---------------------------------------------------------|-----------|---------|---------|
| Lokal Venstre-politiker hylles ? vil hindre at vi tar i |           | 1       | 0.0%    |
| Lokal Venstre-politiker hylles ? vil ta imot 5000 nye f |           | 3       | 0.1%    |
| Lokal Venstre-politiker skjelles ut ? vil ta imot 5000  |           | 2       | 0.0%    |
| Marerithistoriene om høstens treningstrend              |           | 11      | 0.2%    |
| Mdg-politiker fordømmes etter Facebook-innlegg: «vi tre |           | 4       | 0.1%    |
| Mdg-politiker får kjeft for forslag som vil redusere in |           | 2       | 0.0%    |
| Mdg-politiker får kjeft for forslag som vil øke inntekt |           | 1       | 0.0%    |
| Mdg-politiker får kritikk etter facebook-status: «Homof |           | 6       | 0.1%    |
| Mdg-politiker får massiv støtte - vil åpne flere oljefe |           | 3       | 0.1%    |
| Mdg-politiker får pepper for forslag: vil nekte privati |           | 4       | 0.1%    |
| Mdg-politiker får ros etter facebook-status: «Homofile  |           | 2       | 0.0%    |
| Mdg-politiker får skryt for forslag som vil redusere in |           | 3       | 0.1%    |
| Mdg-politiker får skryt for forslag som vil øke inntekt |           | 1       | 0.0%    |
| Mdg-politiker får skryt for forslag: vil privatisere NS |           | 3       | 0.1%    |
| Mdg-politiker hudflettes etter                          |           | 1       | 0.0%    |

# r7pad14\_headlinesRan\_6: Tilfeldig valgt artikkeloverskrift nr. 6. Bakgrunnsvariabel til konjunksjonseksperiment R7PAD14.

| Verdi                                                             | Merkelapp | Enheter | Prosent |
|-------------------------------------------------------------------|-----------|---------|---------|
| homofiendtlig<br>lovforslag                                       |           |         |         |
| Mdg-politiker<br>hudflettes etter<br>homovennlig<br>lovforslag    |           | 2       | 0.0%    |
| Mdg-politiker<br>hudflettes:<br>mener det burde<br>være vanskelig |           | 1       | 0.0%    |
| Mdg-politiker<br>hudflettes:<br>mener det ikke<br>burde være van  |           | 2       | 0.0%    |
| Mdg-politiker<br>hylles ? mener<br>det er bedre med<br>flere kul  |           | 4       | 0.1%    |
| Mdg-politiker<br>hylles ? mener<br>det er bedre med<br>færre kul  |           | 2       | 0.0%    |
| Mdg-politiker<br>lovprises etter<br>Facebook-<br>innlegg: «vi tre |           | 3       | 0.1%    |
| Mdg-politiker<br>lovprises etter<br>homofiendtlig<br>lovforslag   |           | 5       | 0.1%    |
| Mdg-politiker<br>lovprises etter<br>homovennlig<br>lovforslag     |           | 1       | 0.0%    |
| Mdg-politiker<br>lovprises: mener<br>det burde være<br>vanskelig  |           | 1       | 0.0%    |
| Mdg-politiker<br>lovprises: mener<br>det ikke burde<br>være vans  |           | 1       | 0.0%    |
| Mdg-politiker<br>med Facebook-<br>innlegg: «vi<br>trenger ikke fl |           | 3       | 0.1%    |
| Mdg-politiker<br>med forslag<br>som vil redusere<br>inntektsfors  |           | 3       | 0.1%    |
| Mdg-politiker<br>med forslag<br>som vil øke<br>inntektsforskjell  |           | 1       | 0.0%    |
| Mdg-<br>politiker med<br>homofiendtlig<br>lovforslag              |           | 4       | 0.1%    |

# r7pad14\_headlinesRan\_6: Tilfeldig valgt artikkeloverskrift nr. 6. Bakgrunnsvariabel til konjunksjonseksperiment R7PAD14.

| Verdi                                                   | Merkelapp | Enheter | Prosent |
|---------------------------------------------------------|-----------|---------|---------|
| Mdg-politiker med homovenlig lovforslag                 |           | 1       | 0.0%    |
| Mdg-politiker mener alle offentlige aktiviteter ikke ka |           | 9       | 0.2%    |
| Mdg-politiker mener alle offentlige aktiviteter kan gjo |           | 6       | 0.1%    |
| Mdg-politiker mener det burde være vanskeligere for hom |           | 2       | 0.0%    |
| Mdg-politiker mener det er bedre med flere kulturer og  |           | 2       | 0.0%    |
| Mdg-politiker mener det ikke burde være vanskeligere fo |           | 2       | 0.0%    |
| Mdg-politiker mener flyktninger bør ha samme rett til s |           | 4       | 0.1%    |
| Mdg-politiker mener flyktninger ikke bør ha samme rett  |           | 4       | 0.1%    |
| Mdg-politiker møter massiv motstand - vil ikke åpne fle |           | 2       | 0.0%    |
| Mdg-politiker møter massiv motstand - vil åpne flere ol |           | 3       | 0.1%    |
| Mdg-politiker presenterer forslag: vil nekte privatiser |           | 1       | 0.0%    |
| Mdg-politiker presenterer forslag: vil privatisere NSB  |           | 2       | 0.0%    |
| Mdg-politiker på Facebook: «Homofile par MÅ få like ret |           | 4       | 0.1%    |
| Mdg-politiker skjelles ut ?                             |           | 1       | 0.0%    |

# r7pad14\_headlinesRan\_6: Tilfeldig valgt artikkeloverskrift nr. 6. Bakgrunnsvariabel til konjunksjonseksperiment R7PAD14.

| Verdi                                                       | Merkelapp | Enheter | Prosent |
|-------------------------------------------------------------|-----------|---------|---------|
| mener det er bedre med fler                                 |           |         |         |
| Mdg-politiker skjelles ut ?<br>mener det er bedre med færre |           | 1       | 0.0%    |
| Mdg-politiker vil ikke åpne flere oljefelt i nord           |           | 1       | 0.0%    |
| Mdg-politiker vil åpne flere oljefelt i nord                |           | 3       | 0.1%    |
| Mdg-profil blir hedret etter twittermelding ?<br>vil steng  |           | 1       | 0.0%    |
| Mdg-profil blir hedret etter twittermelding ?<br>vil åpne   |           | 3       | 0.1%    |
| Mdg-profil blir latterliggjort etter twittermelding ?<br>vi |           | 6       | 0.1%    |
| Mdg-profil i åpent brev: «jeg vil IKKE at flyktinger sk     |           | 10      | 0.2%    |
| Mdg-profil i åpent brev: «jeg vil at flyktinger skal få     |           | 6       | 0.1%    |
| Mdg-profil lanserer forslag om flere privatskoler i Nor     |           | 2       | 0.0%    |
| Mdg-profil mener at kommersielle skoler bør forbys          |           | 2       | 0.0%    |
| Mdg-profil mener at kommersielle skoler bør tillates        |           | 4       | 0.1%    |
| Mdg-profil møter begeistring - mener at kommersielle sk     |           | 2       | 0.0%    |
| Mdg-profil møter begeistring for forslag om flere priva     |           | 2       | 0.0%    |
| Mdg-profil møter begeistring for                            |           | 2       | 0.0%    |

# r7pad14\_headlinesRan\_6: Tilfeldig valgt artikkeloverskrift nr. 6. Bakgrunnsvariabel til konjunksjonseksperiment R7PAD14.

| Verdi                                                    | Merkelapp | Enheter | Prosent |
|----------------------------------------------------------|-----------|---------|---------|
| forslag om færre priva                                   |           |         |         |
| Mdg-profil møter proteststorm - mener at kommersielle s  |           | 3       | 0.1%    |
| Mdg-profil møter proteststorm for forslag om flere priv  |           | 4       | 0.1%    |
| Mdg-profil møter proteststorm for forslag om færre priv  |           | 2       | 0.0%    |
| Mdg-profil på twitter: vil stenge for oljeboring i nord  |           | 2       | 0.0%    |
| Mdg-profil på twitter: vil åpne for oljeboring i nord    |           | 1       | 0.0%    |
| Mdg-representant refsers ? vil sikre at ingen private sk |           | 3       | 0.1%    |
| Mdg-representant refsers ? vil åpne for at noen private  |           | 3       | 0.1%    |
| Mdg-representant roses ? vil sikre at ingen private sko  |           | 2       | 0.0%    |
| Mdg-representant vil sikre at ingen private skoler skal  |           | 1       | 0.0%    |
| Mdg-representant vil åpne for at noen private skoler sk  |           | 2       | 0.0%    |
| Mdg-topp kjemper for oljeboring i Lofoten                |           | 3       | 0.1%    |
| Mdg-topp kjemper for oljeboring i Lofoten - får massiv   |           | 1       | 0.0%    |

# r7pad14\_headlinesRan\_6: Tilfeldig valgt artikkeloverskrift nr. 6. Bakgrunnsvariabel til konjunksjonseksperiment R7PAD14.

| Verdi                                                   | Merkelapp | Enheter | Prosent |
|---------------------------------------------------------|-----------|---------|---------|
| Mdg-topp kjemper for oljeboring i Lofoten - møter massi |           | 2       | 0.0%    |
| Mdg-topp kjemper mot oljeboring i Lofoten               |           | 2       | 0.0%    |
| Mdg-topp kjemper mot oljeboring i Lofoten - får massiv  |           | 1       | 0.0%    |
| Mdg-topp kjemper mot oljeboring i Lofoten - møter massi |           | 6       | 0.1%    |
| Mdg-topp mener at skattenivået burde reduseres          |           | 5       | 0.1%    |
| Mdg-topp mener at skattenivået ikke burde reduseres     |           | 2       | 0.0%    |
| Mdg-topp presser på for å gi NAV-penger til Syriske fly |           | 6       | 0.1%    |
| Mdg-topp truer med å ta NAV-penger fra Syriske flykting |           | 2       | 0.0%    |
| Mdg-topp vil gi mer til de rike                         |           | 3       | 0.1%    |
| Mdg-topp vil gi mer til de rike - blir refset           |           | 4       | 0.1%    |
| Mdg-topp vil gi mer til de rike - blir roset            |           | 1       | 0.0%    |
| Mdg-topp vil ta mer fra de rike                         |           | 3       | 0.1%    |
| Mdg-topp vil ta mer fra de rike - blir refset           |           | 2       | 0.0%    |
| Mdg-topp: Vil avskaffe eiendomsskatten i alle norske by |           | 2       | 0.0%    |
| Mdg-topp: Vil innføre eiendomsskatt i alle norske byer. |           | 3       | 0.1%    |
| Norges store sangstjerne                                |           | 13      | 0.3%    |

# r7pad14\_headlinesRan\_6: Tilfeldig valgt artikkeloverskrift nr. 6. Bakgrunnsvariabel til konjunksjonseksperiment R7PAD14.

| Verdi                                                   | Merkelapp | Enheter | Prosent |
|---------------------------------------------------------|-----------|---------|---------|
| får refs i fersk anmeldelse                             |           |         |         |
| Norges store sangstjerne får ros i fersk anmeldelse     |           | 13      | 0.3%    |
| Norges store sangstjerne i fersk anmeldelse             |           | 12      | 0.3%    |
| Politiker fra Ap vil senke formueskatten                |           | 2       | 0.0%    |
| Politiker fra Ap vil senke formueskatten, blir roset    |           | 3       | 0.1%    |
| Politiker fra Ap vil senke formueskatten, mottar sterk  |           | 1       | 0.0%    |
| Politiker fra Ap vil øke formueskatten                  |           | 2       | 0.0%    |
| Politiker fra Ap vil øke formueskatten, blir roset      |           | 1       | 0.0%    |
| Politiker fra Ap vil øke formueskatten, mottar sterk kr |           | 3       | 0.1%    |
| Politiker fra Frp vil senke formueskatten               |           | 1       | 0.0%    |
| Politiker fra Frp vil senke formueskatten, blir roset   |           | 5       | 0.1%    |
| Politiker fra Frp vil senke formueskatten, mottar sterk |           | 1       | 0.0%    |
| Politiker fra Frp vil øke formueskatten                 |           | 2       | 0.0%    |
| Politiker fra Frp vil øke formueskatten, blir roset     |           | 1       | 0.0%    |
| Politiker fra Frp vil øke formueskatten, mottar sterk k |           | 3       | 0.1%    |
| Politiker fra Høyre vil senke formueskatten             |           | 1       | 0.0%    |
| Politiker fra Høyre vil senke                           |           | 1       | 0.0%    |



# r7pad14\_headlinesRan\_6: Tilfeldig valgt artikkeloverskrift nr. 6. Bakgrunnsvariabel til konjunksjonseksperiment R7PAD14.

| Verdi                                                   | Merkelapp | Enheter | Prosent |
|---------------------------------------------------------|-----------|---------|---------|
| formueskatten, blir roset                               |           |         |         |
| Politiker fra Høyre vil senke formueskatten, mottar ste |           | 1       | 0.0%    |
| Politiker fra Høyre vil øke formueskatten               |           | 2       | 0.0%    |
| Politiker fra Høyre vil øke formueskatten, blir roset   |           | 2       | 0.0%    |
| Politiker fra Høyre vil øke formueskatten, mottar sterk |           | 3       | 0.1%    |
| Politiker fra Krf vil senke formueskatten, blir roset   |           | 3       | 0.1%    |
| Politiker fra Krf vil senke formueskatten, mottar sterk |           | 4       | 0.1%    |
| Politiker fra Krf vil øke formueskatten                 |           | 1       | 0.0%    |
| Politiker fra Krf vil øke formueskatten, blir roset     |           | 3       | 0.1%    |
| Politiker fra Mdg vil senke formueskatten               |           | 1       | 0.0%    |
| Politiker fra Mdg vil senke formueskatten, blir roset   |           | 1       | 0.0%    |
| Politiker fra Mdg vil senke formueskatten, mottar sterk |           | 3       | 0.1%    |
| Politiker fra Mdg vil øke formueskatten                 |           | 1       | 0.0%    |
| Politiker fra Mdg vil øke formueskatten, blir roset     |           | 2       | 0.0%    |
| Politiker fra Mdg vil øke formueskatten, mottar sterk k |           | 1       | 0.0%    |
| Politiker fra Rødt vil senke formueskatten              |           | 2       | 0.0%    |

# r7pad14\_headlinesRan\_6: Tilfeldig valgt artikkeloverskrift nr. 6. Bakgrunnsvariabel til konjunksjonseksperiment R7PAD14.

| Verdi                                                   | Merkelapp | Enheter | Prosent |
|---------------------------------------------------------|-----------|---------|---------|
| Politiker fra Rødt vil senke formueskatten, mottar ster |           | 4       | 0.1%    |
| Politiker fra Rødt vil øke formueskatten                |           | 3       | 0.1%    |
| Politiker fra Rødt vil øke formueskatten, blir roset    |           | 1       | 0.0%    |
| Politiker fra Rødt vil øke formueskatten, mottar sterk  |           | 4       | 0.1%    |
| Politiker fra Sp vil senke formueskatten                |           | 2       | 0.0%    |
| Politiker fra Sp vil senke formueskatten, blir roset    |           | 2       | 0.0%    |
| Politiker fra Sp vil øke formueskatten                  |           | 4       | 0.1%    |
| Politiker fra Sp vil øke formueskatten, blir roset      |           | 1       | 0.0%    |
| Politiker fra Sp vil øke formueskatten, mottar sterk kr |           | 2       | 0.0%    |
| Politiker fra Sv vil senke formueskatten, blir roset    |           | 1       | 0.0%    |
| Politiker fra Sv vil senke formueskatten, mottar sterk  |           | 2       | 0.0%    |
| Politiker fra Sv vil øke formueskatten, blir roset      |           | 1       | 0.0%    |
| Politiker fra Sv vil øke formueskatten, mottar sterk kr |           | 3       | 0.1%    |
| Politiker fra Venstre vil senke formueskatten           |           | 1       | 0.0%    |
| Politiker fra Venstre vil senke formueskatten, blir ros |           | 1       | 0.0%    |

# r7pad14\_headlinesRan\_6: Tilfeldig valgt artikkeloverskrift nr. 6. Bakgrunnsvariabel til konjunksjonseksperiment R7PAD14.

| Verdi                                                   | Merkelapp | Enheter | Prosent |
|---------------------------------------------------------|-----------|---------|---------|
| Politiker fra Venstre vil senke formueskatten, mottar s |           | 2       | 0.0%    |
| Politiker fra Venstre vil øke formueskatten, blir roset |           | 2       | 0.0%    |
| Politiker fra Venstre vil øke formueskatten, mottar ste |           | 1       | 0.0%    |
| Refser forslag fra Ap-topp som vil redusere lønnsforskj |           | 2       | 0.0%    |
| Refser forslag fra Ap-topp som vil øke lønnsforskjeller |           | 1       | 0.0%    |
| Refser forslag fra Frp-topp som vil redusere lønnsforsk |           | 2       | 0.0%    |
| Refser forslag fra Frp-topp som vil øke lønnsforskjelle |           | 5       | 0.1%    |
| Refser forslag fra Høyre-topp som vil redusere lønnsfor |           | 2       | 0.0%    |
| Refser forslag fra Høyre-topp som vil øke lønnsforskjel |           | 2       | 0.0%    |
| Refser forslag fra Krf-topp som vil redusere lønnsforsk |           | 2       | 0.0%    |
| Refser forslag fra Krf-topp som vil øke lønnsforskjelle |           | 5       | 0.1%    |
| Refser forslag fra Mdg-topp som vil redusere lønnsforsk |           | 1       | 0.0%    |
| Refser forslag fra Rødt-topp som vil redusere lønnsfors |           | 3       | 0.1%    |
| Refser forslag fra Sp-topp som vil redusere lønnsforskj |           | 1       | 0.0%    |

# r7pad14\_headlinesRan\_6: Tilfeldig valgt artikkeloverskrift nr. 6. Bakgrunnsvariabel til konjunksjonseksperiment R7PAD14.

| Verdi                                                   | Merkelapp | Enheter | Prosent |
|---------------------------------------------------------|-----------|---------|---------|
| Refser forslag fra Sv-topp som vil redusere lønnsforskj |           | 2       | 0.0%    |
| Refser forslag fra Sv-topp som vil øke lønnsforskjeller |           | 2       | 0.0%    |
| Refser forslag fra Venstre-topp som vil redusere lønnsf |           | 4       | 0.1%    |
| Refser forslag fra Venstre-topp som vil øke lønnsforskj |           | 1       | 0.0%    |
| Roser forslag fra Ap-topp som vil redusere lønnsforskje |           | 4       | 0.1%    |
| Roser forslag fra Ap-topp som vil øke lønnsforskjeller  |           | 4       | 0.1%    |
| Roser forslag fra Frp-topp som vil redusere lønnsforskj |           | 1       | 0.0%    |
| Roser forslag fra Frp-topp som vil øke lønnsforskjeller |           | 3       | 0.1%    |
| Roser forslag fra Krf-topp som vil redusere lønnsforskj |           | 3       | 0.1%    |
| Roser forslag fra Krf-topp som vil øke lønnsforskjeller |           | 1       | 0.0%    |
| Roser forslag fra Mdg-topp som vil redusere lønnsforskj |           | 1       | 0.0%    |
| Roser forslag fra Mdg-topp som vil øke lønnsforskjeller |           | 1       | 0.0%    |
| Roser forslag fra Rødt-topp som vil redusere lønnsforsk |           | 4       | 0.1%    |
| Roser forslag fra Rødt-topp som vil øke lønnsforskjelle |           | 4       | 0.1%    |
| Roser forslag fra Sp-topp som                           |           | 4       | 0.1%    |

# r7pad14\_headlinesRan\_6: Tilfeldig valgt artikkeloverskrift nr. 6. Bakgrunnsvariabel til konjunksjonseksperiment R7PAD14.

| Verdi                                                   | Merkelapp | Enheter | Prosent |
|---------------------------------------------------------|-----------|---------|---------|
| vil redusere lønnsforskje                               |           |         |         |
| Roser forslag fra Sp-topp som vil øke lønnsforskjeller  |           | 4       | 0.1%    |
| Roser forslag fra Sv-topp som vil redusere lønnsforskje |           | 2       | 0.0%    |
| Roser forslag fra Sv-topp som vil øke lønnsforskjeller  |           | 5       | 0.1%    |
| Roser forslag fra Venstre-topp som vil redusere lønnsfo |           | 1       | 0.0%    |
| Roser forslag fra Venstre-topp som vil øke lønnsforskje |           | 4       | 0.1%    |
| Rødt-politiker får kjeft for forslag som vil redusere i |           | 2       | 0.0%    |
| Rødt-politiker får kritikk etter facebook-status: «Homo |           | 2       | 0.0%    |
| Rødt-politiker får massiv støtte - vil ikke åpne flere  |           | 4       | 0.1%    |
| Rødt-politiker får pepper for forslag: vil nekte privat |           | 4       | 0.1%    |
| Rødt-politiker får pepper for forslag: vil privatisere  |           | 1       | 0.0%    |
| Rødt-politiker får ros etter facebook-status: «Homofile |           | 2       | 0.0%    |
| Rødt-politiker får skryt for forslag som vil redusere i |           | 1       | 0.0%    |
| Rødt-politiker får skryt for forslag som vil øke inntek |           | 3       | 0.1%    |
| Rødt-politiker får skryt for forslag: vil privatisere N |           | 2       | 0.0%    |

# r7pad14\_headlinesRan\_6: Tilfeldig valgt artikkeloverskrift nr. 6. Bakgrunnsvariabel til konjunksjonseksperiment R7PAD14.

| Verdi                                                     | Merkelapp | Enheter | Prosent |
|-----------------------------------------------------------|-----------|---------|---------|
| Rødt-politiker hudflettes etter homofiendtlig lovforsla   |           | 1       | 0.0%    |
| Rødt-politiker hudflettes etter homovennlig lovforslag    |           | 7       | 0.1%    |
| Rødt-politiker hudflettes: mener det burde være vanskelig |           | 4       | 0.1%    |
| Rødt-politiker hudflettes: mener det ikke burde være va   |           | 3       | 0.1%    |
| Rødt-politiker hylles ? mener det er bedre med flere ku   |           | 2       | 0.0%    |
| Rødt-politiker lovprises etter Facebook-innlegg: «vi tr   |           | 5       | 0.1%    |
| Rødt-politiker lovprises etter homofiendtlig lovforslag   |           | 2       | 0.0%    |
| Rødt-politiker lovprises etter homovennlig lovforslag     |           | 2       | 0.0%    |
| Rødt-politiker lovprises: mener det ikke burde være van   |           | 1       | 0.0%    |
| Rødt-politiker med Facebook-innlegg: «vi trenger flere    |           | 1       | 0.0%    |
| Rødt-politiker med Facebook-innlegg: «vi trenger ikke f   |           | 3       | 0.1%    |
| Rødt-politiker med forslag som vil redusere inntektsfor   |           | 4       | 0.1%    |
| Rødt-politiker med forslag som vil øke inntektsforskjel   |           | 2       | 0.0%    |
| Rødt-politiker med homofiendtlig lovforslag               |           | 4       | 0.1%    |
| Rødt-politiker med                                        |           | 3       | 0.1%    |

# r7pad14\_headlinesRan\_6: Tilfeldig valgt artikkeloverskrift nr. 6. Bakgrunnsvariabel til konjunksjonseksperiment R7PAD14.

| Verdi                                                               | Merkelapp | Enheter | Prosent |
|---------------------------------------------------------------------|-----------|---------|---------|
| homovennlig<br>lovforslag                                           |           |         |         |
| Rødt-politiker<br>mener alle<br>offentlige<br>aktiviteter ikke k    |           | 4       | 0.1%    |
| Rødt-politiker<br>mener alle<br>offentlige<br>aktiviteter kan gj    |           | 3       | 0.1%    |
| Rødt-politiker<br>mener det<br>burde være<br>vanskeligere for<br>ho |           | 2       | 0.0%    |
| Rødt-politiker<br>mener det er<br>bedre med flere<br>kulturer og    |           | 1       | 0.0%    |
| Rødt-politiker<br>mener det er<br>bedre med færre<br>kulturer og    |           | 2       | 0.0%    |
| Rødt-politiker<br>mener det ikke<br>burde være<br>vanskeligere f    |           | 4       | 0.1%    |
| Rødt-politiker<br>mener<br>flyktninger bør<br>ha samme rett til     |           | 8       | 0.2%    |
| Rødt-politiker<br>mener<br>flyktninger ikke<br>bør ha samme<br>rett |           | 2       | 0.0%    |
| Rødt-politiker<br>møter massiv<br>motstand - vil<br>ikke åpne fl    |           | 1       | 0.0%    |
| Rødt-politiker<br>presenterer<br>forslag: vil nekte<br>privatisere  |           | 1       | 0.0%    |
| Rødt-politiker<br>presenterer<br>forslag: vil<br>privatisere NSB    |           | 3       | 0.1%    |
| Rødt-politiker<br>på Facebook:<br>«Homofile par<br>MÅ få like re    |           | 1       | 0.0%    |
| Rødt-politiker<br>skjelles ut ?<br>mener det er<br>bedre med fle    |           | 2       | 0.0%    |
| Rødt-politiker<br>skjelles ut ?                                     |           | 1       | 0.0%    |

# r7pad14\_headlinesRan\_6: Tilfeldig valgt artikkeloverskrift nr. 6. Bakgrunnsvariabel til konjunksjonseksperiment R7PAD14.

| Verdi                                                    | Merkelapp | Enheter | Prosent |
|----------------------------------------------------------|-----------|---------|---------|
| mener det er bedre med fær                               |           |         |         |
| Rødt-politiker vil ikke åpne flere oljefelt i nord       |           | 4       | 0.1%    |
| Rødt-politiker vil åpne flere oljefelt i nord            |           | 2       | 0.0%    |
| Rødt-profil blir hedret etter twittermelding ? vil sten  |           | 2       | 0.0%    |
| Rødt-profil blir hedret etter twittermelding ? vil åpne  |           | 3       | 0.1%    |
| Rødt-profil blir latterliggjort etter twittermelding ? v |           | 2       | 0.0%    |
| Rødt-profil i åpent brev: «jeg vil IKKE at flyktinger s  |           | 6       | 0.1%    |
| Rødt-profil i åpent brev: «jeg vil at flyktinger skal f  |           | 1       | 0.0%    |
| Rødt-profil lanserer forslag om flere privatskoler i No  |           | 1       | 0.0%    |
| Rødt-profil lanserer forslag om færre privatskoler i No  |           | 4       | 0.1%    |
| Rødt-profil mener at kommersielle skoler bør forbys      |           | 2       | 0.0%    |
| Rødt-profil mener at kommersielle skoler bør tillates    |           | 2       | 0.0%    |
| Rødt-profil møter begeistring - mener at kommersielle s  |           | 5       | 0.1%    |
| Rødt-profil møter begeistring for forslag om flere priv  |           | 5       | 0.1%    |
| Rødt-profil møter begeistring for                        |           | 2       | 0.0%    |



# r7pad14\_headlinesRan\_6: Tilfeldig valgt artikkeloverskrift nr. 6. Bakgrunnsvariabel til konjunksjonseksperiment R7PAD14.

| Verdi                                                                | Merkelapp | Enheter | Prosent |
|----------------------------------------------------------------------|-----------|---------|---------|
| forslag om færre<br>priv                                             |           |         |         |
| Rødt-profil<br>møter<br>proteststorm<br>- mener at<br>kommersielle   |           | 4       | 0.1%    |
| Rødt-profil<br>møter<br>proteststorm for<br>forslag om flere<br>pri  |           | 1       | 0.0%    |
| Rødt-profil<br>møter<br>proteststorm for<br>forslag om færre<br>pri  |           | 2       | 0.0%    |
| Rødt-profil<br>på twitter:<br>vil stenge for<br>oljeboring i nor     |           | 1       | 0.0%    |
| Rødt-profil på<br>twitter: vil åpne<br>for oljeboring i<br>nord      |           | 3       | 0.1%    |
| Rødt-<br>representant<br>refses ? vil sikre<br>at ingen private s    |           | 2       | 0.0%    |
| Rødt-<br>representant<br>refses ? vil<br>åpne for at noen<br>private |           | 4       | 0.1%    |
| Rødt-<br>representant<br>roses ? vil sikre<br>at ingen private<br>sk |           | 3       | 0.1%    |
| Rødt-<br>representant<br>roses ? vil åpne<br>for at noen<br>private  |           | 2       | 0.0%    |
| Rødt-<br>representant vil<br>sikre at ingen<br>private skoler<br>ska |           | 2       | 0.0%    |
| Rødt-<br>representant vil<br>åpne for at noen<br>private skoler s    |           | 1       | 0.0%    |
| Rødt-topp<br>kjemper for<br>oljeboring i<br>Lofoten                  |           | 1       | 0.0%    |
| Rødt-topp<br>kjemper for                                             |           | 1       | 0.0%    |

# r7pad14\_headlinesRan\_6: Tilfeldig valgt artikkeloverskrift nr. 6. Bakgrunnsvariabel til konjunksjonseksperiment R7PAD14.

| Verdi                                                   | Merkelapp | Enheter | Prosent |
|---------------------------------------------------------|-----------|---------|---------|
| oljeboring i Lofoten - får massiv                       |           |         |         |
| Rødt-topp kjemper for oljeboring i Lofoten - møter mass |           | 4       | 0.1%    |
| Rødt-topp kjemper mot oljeboring i Lofoten - får massiv |           | 3       | 0.1%    |
| Rødt-topp kjemper mot oljeboring i Lofoten - møter mass |           | 6       | 0.1%    |
| Rødt-topp mener at skattenivået burde reduseres         |           | 2       | 0.0%    |
| Rødt-topp presser på for å gi NAV-penger til Syriske fl |           | 5       | 0.1%    |
| Rødt-topp truer med å ta NAV-penger fra Syriske flyktin |           | 6       | 0.1%    |
| Rødt-topp vil gi mer til de rike                        |           | 1       | 0.0%    |
| Rødt-topp vil gi mer til de rike - blir refset          |           | 3       | 0.1%    |
| Rødt-topp vil gi mer til de rike - blir roset           |           | 3       | 0.1%    |
| Rødt-topp vil ta mer fra de rike                        |           | 1       | 0.0%    |
| Rødt-topp vil ta mer fra de rike - blir refset          |           | 1       | 0.0%    |
| Rødt-topp: Vil avskaffe eiendomsskatten i alle norske b |           | 1       | 0.0%    |
| Rødt-topp: Vil innføre eiendomsskatt i alle norske byer |           | 3       | 0.1%    |
| Sp-politiker fordømmes etter Facebook-innlegg: «vi tren |           | 5       | 0.1%    |
| Sp-politiker får kjeft for forslag som vil redusere inn |           | 1       | 0.0%    |

# r7pad14\_headlinesRan\_6: Tilfeldig valgt artikkeloverskrift nr. 6. Bakgrunnsvariabel til konjunksjonseksperiment R7PAD14.

| Verdi                                                     | Merkelapp | Enheter | Prosent |
|-----------------------------------------------------------|-----------|---------|---------|
| Sp-politiker får kritikk etter facebook-status: «Homofi   |           | 4       | 0.1%    |
| Sp-politiker får massiv støtte - vil ikke åpne flere ol   |           | 4       | 0.1%    |
| Sp-politiker får massiv støtte - vil åpne flere oljefel   |           | 1       | 0.0%    |
| Sp-politiker får pepper for forslag: vil privatisere NS   |           | 2       | 0.0%    |
| Sp-politiker får ros etter facebook-status: «Homofile p   |           | 4       | 0.1%    |
| Sp-politiker får skryt for forslag som vil redusere inn   |           | 1       | 0.0%    |
| Sp-politiker får skryt for forslag som vil øke inntekts   |           | 3       | 0.1%    |
| Sp-politiker får skryt for forslag: vil nekte privatisere |           | 1       | 0.0%    |
| Sp-politiker får skryt for forslag: vil privatisere NSB   |           | 2       | 0.0%    |
| Sp-politiker hudflettes etter homofiendtlig lovforslag    |           | 4       | 0.1%    |
| Sp-politiker hudflettes etter homovennlig lovforslag      |           | 2       | 0.0%    |
| Sp-politiker hudflettes: mener det ikke burde være vans   |           | 1       | 0.0%    |
| Sp-politiker hylles ? mener det er bedre med flere kult   |           | 2       | 0.0%    |
| Sp-politiker hylles ? mener det er bedre med færre kult   |           | 2       | 0.0%    |
| Sp-politiker lovprises etter                              |           | 3       | 0.1%    |

# r7pad14\_headlinesRan\_6: Tilfeldig valgt artikkeloverskrift nr. 6. Bakgrunnsvariabel til konjunksjonseksperiment R7PAD14.

| Verdi                                                   | Merkelapp | Enheter | Prosent |
|---------------------------------------------------------|-----------|---------|---------|
| Facebook-innlegg: «vi tren                              |           |         |         |
| Sp-politiker lovpriser etter homovennlig lovforslag     |           | 3       | 0.1%    |
| Sp-politiker lovpriser: mener det burde være vanskelige |           | 1       | 0.0%    |
| Sp-politiker lovpriser: mener det ikke burde være vansk |           | 2       | 0.0%    |
| Sp-politiker med Facebook-innlegg: «vi trenger flere mu |           | 1       | 0.0%    |
| Sp-politiker med Facebook-innlegg: «vi trenger ikke fle |           | 5       | 0.1%    |
| Sp-politiker med forslag som vil redusere inntektsforsk |           | 2       | 0.0%    |
| Sp-politiker med forslag som vil øke inntektsforskjelle |           | 2       | 0.0%    |
| Sp-politiker med homofiendtlig lovforslag               |           | 1       | 0.0%    |
| Sp-politiker med homovennlig lovforslag                 |           | 2       | 0.0%    |
| Sp-politiker mener alle offentlige aktiviteter ikke kan |           | 5       | 0.1%    |
| Sp-politiker mener alle offentlige aktiviteter kan gjør |           | 10      | 0.2%    |
| Sp-politiker mener det burde være vanskeligere for homo |           | 1       | 0.0%    |
| Sp-politiker mener det er bedre med flere kulturer og r |           | 1       | 0.0%    |
| Sp-politiker mener det er                               |           | 2       | 0.0%    |

# r7pad14\_headlinesRan\_6: Tilfeldig valgt artikkeloverskrift nr. 6. Bakgrunnsvariabel til konjunksjonseksperiment R7PAD14.

| Verdi                                                    | Merkelapp | Enheter | Prosent |
|----------------------------------------------------------|-----------|---------|---------|
| bedre med færre kulturer og r                            |           |         |         |
| Sp-politiker mener flyktninger bør ha samme rett til so  |           | 5       | 0.1%    |
| Sp-politiker mener flyktninger ikke bør ha samme rett t  |           | 9       | 0.2%    |
| Sp-politiker møter massiv motstand - vil ikke åpne fler  |           | 4       | 0.1%    |
| Sp-politiker møter massiv motstand - vil åpne flere olj  |           | 4       | 0.1%    |
| Sp-politiker presenterer forslag: vil nekte privatiseri  |           | 5       | 0.1%    |
| Sp-politiker presenterer forslag: vil privatisere NSB    |           | 2       | 0.0%    |
| Sp-politiker på Facebook: «Homofile par MÅ få like rett  |           | 2       | 0.0%    |
| Sp-politiker skjelles ut ? mener det er bedre med flere  |           | 2       | 0.0%    |
| Sp-politiker vil ikke åpne flere oljefelt i nord         |           | 1       | 0.0%    |
| Sp-politiker vil åpne flere oljefelt i nord              |           | 1       | 0.0%    |
| Sp-profil blir hedret etter twittermelding ? vil stenge  |           | 6       | 0.1%    |
| Sp-profil blir hedret etter twittermelding ? vil åpne f  |           | 1       | 0.0%    |
| Sp-profil blir latterligjort etter twittermelding ? vil  |           | 4       | 0.1%    |
| Sp-profil i åpent brev: «jeg vil IKKE at flyktninger ska |           | 5       | 0.1%    |

# r7pad14\_headlinesRan\_6: Tilfeldig valgt artikkeloverskrift nr. 6. Bakgrunnsvariabel til konjunksjonseksperiment R7PAD14.

| Verdi                                                   | Merkelapp | Enheter | Prosent |
|---------------------------------------------------------|-----------|---------|---------|
| Sp-profil i åpent brev: «jeg vil at flyktinger skal få  |           | 5       | 0.1%    |
| Sp-profil lanserer forslag om flere privatskoler i Norg |           | 5       | 0.1%    |
| Sp-profil mener at kommersielle skoler bør forbys       |           | 1       | 0.0%    |
| Sp-profil mener at kommersielle skoler bør tillates     |           | 3       | 0.1%    |
| Sp-profil møter begeistring - mener at kommersielle sko |           | 4       | 0.1%    |
| Sp-profil møter begeistring for forslag om flere privat |           | 3       | 0.1%    |
| Sp-profil møter begeistring for forslag om færre privat |           | 2       | 0.0%    |
| Sp-profil møter proteststorm - mener at kommersielle sk |           | 3       | 0.1%    |
| Sp-profil møter proteststorm for forslag om flere priva |           | 3       | 0.1%    |
| Sp-profil møter proteststorm for forslag om færre priva |           | 2       | 0.0%    |
| Sp-profil på twitter: vil stenge for oljeboring i nord  |           | 1       | 0.0%    |
| Sp-profil på twitter: vil åpne for oljeboring i nord    |           | 3       | 0.1%    |
| Sp-representant refses ? vil sikre at ingen private sko |           | 1       | 0.0%    |
| Sp-representant refses ? vil åpne for at noen private s |           | 1       | 0.0%    |
| Sp-representant roses ? vil sikre                       |           | 1       | 0.0%    |

# r7pad14\_headlinesRan\_6: Tilfeldig valgt artikkeloverskrift nr. 6. Bakgrunnsvariabel til konjunksjonseksperiment R7PAD14.

| Verdi                                                   | Merkelapp | Enheter | Prosent |
|---------------------------------------------------------|-----------|---------|---------|
| at ingen private skol                                   |           |         |         |
| Sp-representant vil sikre at ingen private skoler skal  |           | 2       | 0.0%    |
| Sp-representant vil åpne for at noen private skoler ska |           | 1       | 0.0%    |
| Sp-topp kjemper for oljeboring i Lofoten                |           | 4       | 0.1%    |
| Sp-topp kjemper for oljeboring i Lofoten - møter massiv |           | 3       | 0.1%    |
| Sp-topp kjemper mot oljeboring i Lofoten                |           | 3       | 0.1%    |
| Sp-topp kjemper mot oljeboring i Lofoten - møter massiv |           | 2       | 0.0%    |
| Sp-topp mener at skattenivået burde reduseres           |           | 2       | 0.0%    |
| Sp-topp mener at skattenivået ikke burde reduseres      |           | 4       | 0.1%    |
| Sp-topp presser på for å gi NAV-penger til Syriske flyk |           | 6       | 0.1%    |
| Sp-topp truer med å ta NAV-penger fra Syriske flyktinge |           | 3       | 0.1%    |
| Sp-topp vil gi mer til de rike                          |           | 2       | 0.0%    |
| Sp-topp vil gi mer til de rike - blir refset            |           | 2       | 0.0%    |
| Sp-topp vil gi mer til de rike - blir roset             |           | 3       | 0.1%    |
| Sp-topp vil ta mer fra de rike                          |           | 2       | 0.0%    |
| Sp-topp vil ta mer fra de rike - blir refset            |           | 3       | 0.1%    |
| Sp-topp vil ta mer fra de rike - blir roset             |           | 2       | 0.0%    |
| Sp-topp: Vil avskaffe                                   |           | 5       | 0.1%    |

# r7pad14\_headlinesRan\_6: Tilfeldig valgt artikkeloverskrift nr. 6. Bakgrunnsvariabel til konjunksjonseksperiment R7PAD14.

| Verdi                                                   | Merkelapp | Enheter | Prosent |
|---------------------------------------------------------|-----------|---------|---------|
| eiendomsskatten i alle norske byer                      |           |         |         |
| Sp-topp: Vil innføre eiendomsskatt i alle norske byer.  |           | 2       | 0.0%    |
| Stjernespiller kampklar til morgendagens kamp           |           | 10      | 0.2%    |
| Stjernespiller snakker om morgendagens kamp             |           | 17      | 0.4%    |
| Stjernespiller ute med skade til morgendagens kamp      |           | 17      | 0.4%    |
| Stormer mot Ap-topp: Vil innføre eiendomsskatt i alle n |           | 3       | 0.1%    |
| Stormer mot Frp-topp: Vil avskaffe eiendomsskatten i al |           | 2       | 0.0%    |
| Stormer mot Frp-topp: Vil innføre eiendomsskatt i alle  |           | 1       | 0.0%    |
| Stormer mot Høyre-topp: Vil avskaffe eiendomsskatten i  |           | 5       | 0.1%    |
| Stormer mot Høyre-topp: Vil innføre eiendomsskatt i all |           | 5       | 0.1%    |
| Stormer mot Krf-topp: Vil avskaffe eiendomsskatten i al |           | 4       | 0.1%    |
| Stormer mot Krf-topp: Vil innføre eiendomsskatt i alle  |           | 2       | 0.0%    |
| Stormer mot Mdg-topp: Vil avskaffe eiendomsskatten i al |           | 3       | 0.1%    |
| Stormer mot Mdg-topp:                                   |           | 2       | 0.0%    |



# r7pad14\_headlinesRan\_6: Tilfeldig valgt artikkeloverskrift nr. 6. Bakgrunnsvariabel til konjunksjonseksperiment R7PAD14.

| Verdi                                                   | Merkelapp | Enheter | Prosent |
|---------------------------------------------------------|-----------|---------|---------|
| Vil innføre eiendomsskatt i alle                        |           |         |         |
| Stormer mot Rødt-topp: Vil avskaffe eiendomsskatten i a |           | 2       | 0.0%    |
| Stormer mot Rødt-topp: Vil innføre eiendomsskatt i alle |           | 3       | 0.1%    |
| Stormer mot Sp-topp: Vil avskaffe eiendomsskatten i all |           | 2       | 0.0%    |
| Stormer mot Sv-topp: Vil avskaffe eiendomsskatten i all |           | 2       | 0.0%    |
| Stormer mot Sv-topp: Vil innføre eiendomsskatt i alle n |           | 4       | 0.1%    |
| Stormer mot Venstre-topp: Vil avskaffe eiendomsskatten  |           | 4       | 0.1%    |
| Stormer mot Venstre-topp: Vil innføre eiendomsskatt i a |           | 1       | 0.0%    |
| Suksesshistoriene om høstens treningstrend              |           | 15      | 0.3%    |
| Sv-politiker fordømmes etter Facebook-innlegg: «vi tren |           | 3       | 0.1%    |
| Sv-politiker får kjeft for forslag som vil redusere inn |           | 1       | 0.0%    |
| Sv-politiker får kjeft for forslag som vil øke inntekts |           | 1       | 0.0%    |
| Sv-politiker får kritikk etter facebook-status: «Homofi |           | 3       | 0.1%    |
| Sv-politiker får massiv støtte - vil ikke åpne flere ol |           | 3       | 0.1%    |

# r7pad14\_headlinesRan\_6: Tilfeldig valgt artikkeloverskrift nr. 6. Bakgrunnsvariabel til konjunksjonseksperiment R7PAD14.

| Verdi                                                   | Merkelapp | Enheter | Prosent |
|---------------------------------------------------------|-----------|---------|---------|
| Sv-politiker får massiv støtte - vil åpne flere oljefel |           | 2       | 0.0%    |
| Sv-politiker får pepper for forslag: vil nekte privatis |           | 5       | 0.1%    |
| Sv-politiker får pepper for forslag: vil privatisere NS |           | 2       | 0.0%    |
| Sv-politiker får ros etter facebook-status: «Homofile p |           | 4       | 0.1%    |
| Sv-politiker får skryt for forslag som vil redusere inn |           | 3       | 0.1%    |
| Sv-politiker får skryt for forslag som vil øke inntekts |           | 2       | 0.0%    |
| Sv-politiker får skryt for forslag: vil nekte privatis  |           | 3       | 0.1%    |
| Sv-politiker får skryt for forslag: vil privatisere NSB |           | 1       | 0.0%    |
| Sv-politiker hudflettes etter homofiendtlig lovforslag  |           | 1       | 0.0%    |
| Sv-politiker hudflettes etter homovenlig lovforslag     |           | 1       | 0.0%    |
| Sv-politiker hudflettes: mener det burde være vanskelig |           | 2       | 0.0%    |
| Sv-politiker hudflettes: mener det ikke burde være vans |           | 4       | 0.1%    |
| Sv-politiker hylles ? mener det er bedre med flere kult |           | 4       | 0.1%    |
| Sv-politiker lovprises etter Facebook-innlegg: «vi tren |           | 8       | 0.2%    |
| Sv-politiker lovprises etter                            |           | 3       | 0.1%    |

# r7pad14\_headlinesRan\_6: Tilfeldig valgt artikkeloverskrift nr. 6. Bakgrunnsvariabel til konjunksjonseksperiment R7PAD14.

| Verdi                                                                | Merkelapp | Enheter | Prosent |
|----------------------------------------------------------------------|-----------|---------|---------|
| homovennlig<br>lovforslag                                            |           |         |         |
| Sv-politiker<br>lovpriser: mener<br>det burde være<br>vanskelige     |           | 2       | 0.0%    |
| Sv-politiker<br>lovpriser: mener<br>det ikke burde<br>være vanskelig |           | 4       | 0.1%    |
| Sv-politiker<br>med Facebook-<br>innlegg: «vi<br>trenger flere mu    |           | 2       | 0.0%    |
| Sv-politiker<br>med Facebook-<br>innlegg: «vi<br>trenger ikke fle    |           | 1       | 0.0%    |
| Sv-politiker<br>med forslag<br>som vil redusere<br>inntektsforsk     |           | 3       | 0.1%    |
| Sv-politiker<br>med forslag<br>som vil øke<br>inntektsforskjelle     |           | 3       | 0.1%    |
| Sv-politiker med<br>homofientlig<br>lovforslag                       |           | 1       | 0.0%    |
| Sv-politiker med<br>homovennlig<br>lovforslag                        |           | 5       | 0.1%    |
| Sv-politiker<br>mener alle<br>offentlige<br>aktiviteter ikke<br>kan  |           | 6       | 0.1%    |
| Sv-politiker<br>mener alle<br>offentlige<br>aktiviteter kan<br>gjør  |           | 1       | 0.0%    |
| Sv-politiker<br>mener det<br>burde være<br>vanskeligere for<br>homo  |           | 2       | 0.0%    |
| Sv-politiker<br>mener det er<br>bedre med flere<br>kulturer og r     |           | 3       | 0.1%    |
| Sv-politiker<br>mener det er<br>bedre med færre<br>kulturer og r     |           | 1       | 0.0%    |
| Sv-politiker<br>mener<br>flyktninger bør                             |           | 5       | 0.1%    |

# r7pad14\_headlinesRan\_6: Tilfeldig valgt artikkeloverskrift nr. 6. Bakgrunnsvariabel til konjunksjonseksperiment R7PAD14.

| Verdi                                                    | Merkelapp | Enheter | Prosent |
|----------------------------------------------------------|-----------|---------|---------|
| ha samme rett til so                                     |           |         |         |
| Sv-politiker mener flyktninger ikke bør ha samme rett t  |           | 5       | 0.1%    |
| Sv-politiker møter massiv motstand - vil ikke åpne fler  |           | 2       | 0.0%    |
| Sv-politiker møter massiv motstand - vil åpne flere olj  |           | 2       | 0.0%    |
| Sv-politiker presenterer forslag: vil nekte privatiseri  |           | 6       | 0.1%    |
| Sv-politiker på Facebook: «Homofile par MÅ IKKE få like  |           | 1       | 0.0%    |
| Sv-politiker på Facebook: «Homofile par MÅ få like rett  |           | 3       | 0.1%    |
| Sv-politiker skjelles ut ? mener det er bedre med færre  |           | 2       | 0.0%    |
| Sv-politiker vil ikke åpne flere oljefelt i nord         |           | 3       | 0.1%    |
| Sv-profil blir hedret etter twittermelding ? vil stenge  |           | 5       | 0.1%    |
| Sv-profil blir hedret etter twittermelding ? vil åpne f  |           | 4       | 0.1%    |
| Sv-profil blir latterliggjort etter twittermelding ? vil |           | 3       | 0.1%    |
| Sv-profil i åpent brev: «jeg vil IKKE at flyktinger ska  |           | 6       | 0.1%    |
| Sv-profil i åpent brev: «jeg vil at flyktinger skal få   |           | 4       | 0.1%    |
| Sv-profil lanserer forslag om færre                      |           | 1       | 0.0%    |

# r7pad14\_headlinesRan\_6: Tilfeldig valgt artikkeloverskrift nr. 6. Bakgrunnsvariabel til konjunksjonseksperiment R7PAD14.

| Verdi                                                   | Merkelapp | Enheter | Prosent |
|---------------------------------------------------------|-----------|---------|---------|
| privatskoler i Norg                                     |           |         |         |
| Sv-profil mener at kommersielle skoler bør forbys       |           | 3       | 0.1%    |
| Sv-profil mener at kommersielle skoler bør tillates     |           | 1       | 0.0%    |
| Sv-profil møter begeistring - mener at kommersielle sko |           | 4       | 0.1%    |
| Sv-profil møter begeistring for forslag om flere privat |           | 1       | 0.0%    |
| Sv-profil møter begeistring for forslag om færre privat |           | 4       | 0.1%    |
| Sv-profil møter proteststorm - mener at kommersielle sk |           | 3       | 0.1%    |
| Sv-profil møter proteststorm for forslag om flere priva |           | 5       | 0.1%    |
| Sv-profil møter proteststorm for forslag om færre priva |           | 4       | 0.1%    |
| Sv-profil på twitter: vil stenge for oljeboring i nord  |           | 1       | 0.0%    |
| Sv-profil på twitter: vil åpne for oljeboring i nord    |           | 1       | 0.0%    |
| Sv-representant refses ? vil sikre at ingen private sko |           | 1       | 0.0%    |
| Sv-representant refses ? vil åpne for at noen private s |           | 3       | 0.1%    |
| Sv-representant roses ? vil sikre at ingen private skol |           | 1       | 0.0%    |
| Sv-representant roses ? vil åpne for at noen private sk |           | 4       | 0.1%    |

# r7pad14\_headlinesRan\_6: Tilfeldig valgt artikkeloverskrift nr. 6. Bakgrunnsvariabel til konjunksjonseksperiment R7PAD14.

| Verdi                                                   | Merkelapp | Enheter | Prosent |
|---------------------------------------------------------|-----------|---------|---------|
| Sv-representant vil sikre at ingen private skoler skal  |           | 8       | 0.2%    |
| Sv-representant vil åpne for at noen private skoler ska |           | 2       | 0.0%    |
| Sv-topp kjemper for oljeboring i Lofoten                |           | 2       | 0.0%    |
| Sv-topp kjemper for oljeboring i Lofoten - får massiv s |           | 1       | 0.0%    |
| Sv-topp kjemper for oljeboring i Lofoten - møter massiv |           | 6       | 0.1%    |
| Sv-topp kjemper mot oljeboring i Lofoten                |           | 3       | 0.1%    |
| Sv-topp kjemper mot oljeboring i Lofoten - får massiv s |           | 4       | 0.1%    |
| Sv-topp kjemper mot oljeboring i Lofoten - møter massiv |           | 4       | 0.1%    |
| Sv-topp mener at skattenivået burde reduseres           |           | 1       | 0.0%    |
| Sv-topp mener at skattenivået ikke burde reduseres      |           | 1       | 0.0%    |
| Sv-topp presser på for å gi NAV-penger til Syriske flyk |           | 9       | 0.2%    |
| Sv-topp truer med å ta NAV-penger fra Syriske flyktinge |           | 5       | 0.1%    |
| Sv-topp vil gi mer til de rike                          |           | 3       | 0.1%    |
| Sv-topp vil gi mer til de rike - blir refset            |           | 1       | 0.0%    |
| Sv-topp vil ta mer fra de rike                          |           | 4       | 0.1%    |
| Sv-topp vil ta mer fra de rike - blir refset            |           | 1       | 0.0%    |
| Sv-topp vil ta mer fra de rike - blir roset             |           | 2       | 0.0%    |

# r7pad14\_headlinesRan\_6: Tilfeldig valgt artikkeloverskrift nr. 6. Bakgrunnsvariabel til konjunksjonseksperiment R7PAD14.

| Verdi                                                             | Merkelapp | Enheter | Prosent |
|-------------------------------------------------------------------|-----------|---------|---------|
| Sv-topp:<br>Vil avskaffe<br>eiendomsskatten<br>i alle norske byer |           | 3       | 0.1%    |
| Sv-topp:<br>Vil innføre<br>eiendomsskatt i<br>alle norske byer.   |           | 2       | 0.0%    |
| TV-profiler<br>gifter seg                                         |           | 18      | 0.4%    |
| TV-profiler<br>skiller seg                                        |           | 20      | 0.4%    |
| TV-profiler<br>snakker om livet<br>sammen                         |           | 15      | 0.3%    |
| Tror Norge<br>spiller uavgjort<br>i morgendagens<br>fotballkamp   |           | 19      | 0.4%    |
| Tror Norge taper<br>i morgendagens<br>fotballkamp                 |           | 17      | 0.4%    |
| Tror Norge<br>vinner i<br>morgendagens<br>fotballkamp             |           | 15      | 0.3%    |
| Venstre-politiker<br>fordømmes<br>etter Facebook-<br>innlegg: «vi |           | 3       | 0.1%    |
| Venstre-politiker<br>får kjeft for<br>forslag som vil<br>reduser  |           | 1       | 0.0%    |
| Venstre-politiker<br>får kjeft for<br>forslag som vil<br>øke inn  |           | 3       | 0.1%    |
| Venstre-politiker<br>får kritikk etter<br>facebook-status:<br>«H  |           | 6       | 0.1%    |
| Venstre-politiker<br>får massiv støtte<br>- vil ikke åpne<br>fle  |           | 2       | 0.0%    |
| Venstre-politiker<br>får pepper for<br>forslag: vil nekte<br>pri  |           | 1       | 0.0%    |
| Venstre-politiker<br>får pepper for<br>forslag: vil<br>privatise  |           | 3       | 0.1%    |
| Venstre-politiker<br>får ros etter<br>facebook-status:<br>«Homof  |           | 4       | 0.1%    |

# r7pad14\_headlinesRan\_6: Tilfeldig valgt artikkeloverskrift nr. 6. Bakgrunnsvariabel til konjunksjonseksperiment R7PAD14.

| Verdi                                                   | Merkelapp | Enheter | Prosent |
|---------------------------------------------------------|-----------|---------|---------|
| Venstre-politiker får skryt for forslag som vil reduser |           | 2       | 0.0%    |
| Venstre-politiker får skryt for forslag som vil øke inn |           | 1       | 0.0%    |
| Venstre-politiker får skryt for forslag: vil nekte priv |           | 3       | 0.1%    |
| Venstre-politiker får skryt for forslag: vil privatiser |           | 4       | 0.1%    |
| Venstre-politiker hudflettes etter homofiendtlig lovfor |           | 2       | 0.0%    |
| Venstre-politiker hudflettes etter homovenlig lovfor    |           | 2       | 0.0%    |
| Venstre-politiker hudflettes: mener det burde være vans |           | 1       | 0.0%    |
| Venstre-politiker hudflettes: mener det ikke burde være |           | 3       | 0.1%    |
| Venstre-politiker hylles ? mener det er bedre med flere |           | 1       | 0.0%    |
| Venstre-politiker lovprises etter Facebook-innlegg: «vi |           | 4       | 0.1%    |
| Venstre-politiker lovprises etter homofiendtlig lovfor  |           | 1       | 0.0%    |
| Venstre-politiker lovprises etter homovenlig lovfor     |           | 4       | 0.1%    |
| Venstre-politiker lovprises: mener det burde være vansk |           | 2       | 0.0%    |
| Venstre-politiker lovprises: mener det ikke burde være  |           | 1       | 0.0%    |
| Venstre-politiker med Facebook-                         |           | 4       | 0.1%    |



# r7pad14\_headlinesRan\_6: Tilfeldig valgt artikkeloverskrift nr. 6. Bakgrunnsvariabel til konjunksjonseksperiment R7PAD14.

| Verdi                                                   | Merkelapp | Enheter | Prosent |
|---------------------------------------------------------|-----------|---------|---------|
| innlegg: «vi trenger fle                                |           |         |         |
| Venstre-politiker med Facebook-innlegg: «vi trenger ikk |           | 3       | 0.1%    |
| Venstre-politiker med forslag som vil redusere inntekts |           | 5       | 0.1%    |
| Venstre-politiker med forslag som vil øke inntektsforsk |           | 3       | 0.1%    |
| Venstre-politiker med homofiendtlig lovforslag          |           | 5       | 0.1%    |
| Venstre-politiker med homovennlig lovforslag            |           | 1       | 0.0%    |
| Venstre-politiker mener alle offentlige aktiviteter ikk |           | 4       | 0.1%    |
| Venstre-politiker mener alle offentlige aktiviteter kan |           | 5       | 0.1%    |
| Venstre-politiker mener det burde være vanskeligere for |           | 2       | 0.0%    |
| Venstre-politiker mener det er bedre med flere kulturer |           | 1       | 0.0%    |
| Venstre-politiker mener det er bedre med færre kulturer |           | 1       | 0.0%    |
| Venstre-politiker mener flyktninger bør ha samme rett t |           | 3       | 0.1%    |
| Venstre-politiker mener flyktninger ikke bør ha samme r |           | 10      | 0.2%    |
| Venstre-politiker møter massiv motstand - vil åpne fler |           | 3       | 0.1%    |
| Venstre-politiker presenterer forslag: vil nekte privat |           | 1       | 0.0%    |

# r7pad14\_headlinesRan\_6: Tilfeldig valgt artikkeloverskrift nr. 6. Bakgrunnsvariabel til konjunksjonseksperiment R7PAD14.

| Verdi                                                   | Merkelapp | Enheter | Prosent |
|---------------------------------------------------------|-----------|---------|---------|
| Venstre-politiker presenterer forslag: vil privatisere  |           | 1       | 0.0%    |
| Venstre-politiker på Facebook: «Homofile par MÅ IKKE få |           | 3       | 0.1%    |
| Venstre-politiker på Facebook: «Homofile par MÅ få like |           | 1       | 0.0%    |
| Venstre-politiker skjelles ut ? mener det er bedre med  |           | 2       | 0.0%    |
| Venstre-politiker vil åpne flere oljefelt i nord        |           | 2       | 0.0%    |
| Venstre-profil blir hedret etter twittermelding ? vil å |           | 1       | 0.0%    |
| Venstre-profil blir latterligjort etter twittermelding  |           | 4       | 0.1%    |
| Venstre-profil i åpent brev: «jeg vil IKKE at flyktinge |           | 8       | 0.2%    |
| Venstre-profil i åpent brev: «jeg vil at flyktinger ska |           | 6       | 0.1%    |
| Venstre-profil lanserer forslag om flere privatskoler i |           | 3       | 0.1%    |
| Venstre-profil lanserer forslag om færre privatskoler i |           | 5       | 0.1%    |
| Venstre-profil mener at kommersielle skoler bør forbys  |           | 1       | 0.0%    |
| Venstre-profil mener at kommersielle skoler bør tillate |           | 1       | 0.0%    |
| Venstre-profil møter begeistring - mener at kommersiell |           | 3       | 0.1%    |
| Venstre-profil møter                                    |           | 2       | 0.0%    |

# r7pad14\_headlinesRan\_6: Tilfeldig valgt artikkeloverskrift nr. 6. Bakgrunnsvariabel til konjunksjonseksperiment R7PAD14.

| Verdi                                                   | Merkelapp | Enheter | Prosent |
|---------------------------------------------------------|-----------|---------|---------|
| begeistring for forslag om flere p                      |           |         |         |
| Venstre-profil møter begeistring for forslag om færre p |           | 6       | 0.1%    |
| Venstre-profil møter proteststorm - mener at kommersiel |           | 7       | 0.1%    |
| Venstre-profil møter proteststorm for forslag om flere  |           | 1       | 0.0%    |
| Venstre-profil møter proteststorm for forslag om færre  |           | 2       | 0.0%    |
| Venstre-profil på twitter: vil stenge for oljeboring i  |           | 2       | 0.0%    |
| Venstre-profil på twitter: vil åpne for oljeboring i no |           | 1       | 0.0%    |
| Venstre-representant refses ? vil sikre at ingen privat |           | 1       | 0.0%    |
| Venstre-representant refses ? vil åpne for at noen priv |           | 3       | 0.1%    |
| Venstre-representant roses ? vil sikre at ingen private |           | 5       | 0.1%    |
| Venstre-representant roses ? vil åpne for at noen priva |           | 1       | 0.0%    |
| Venstre-representant vil sikre at ingen private skoler  |           | 1       | 0.0%    |
| Venstre-representant vil åpne for at noen private skole |           | 1       | 0.0%    |
| Venstre-topp kjemper for oljeboring i Lofoten - får mas |           | 2       | 0.0%    |

# r7pad14\_headlinesRan\_6: Tilfeldig valgt artikkeloverskrift nr. 6. Bakgrunnsvariabel til konjunksjonsekspériment R7PAD14.

| Verdi                                                   | Merkelapp | Enheter | Prosent |
|---------------------------------------------------------|-----------|---------|---------|
| Venstre-topp kjemper mot oljeboring i Lofoten           |           | 3       | 0.1%    |
| Venstre-topp kjemper mot oljeboring i Lofoten - får mas |           | 2       | 0.0%    |
| Venstre-topp mener at skattenivået burde reduseres      |           | 4       | 0.1%    |
| Venstre-topp mener at skattenivået ikke burde reduseres |           | 5       | 0.1%    |
| Venstre-topp presser på for å gi NAV-penger til Syriske |           | 7       | 0.1%    |
| Venstre-topp truer med å ta NAV-penger fra Syriske flyk |           | 9       | 0.2%    |
| Venstre-topp vil gi mer til de rike - blir refset       |           | 1       | 0.0%    |
| Venstre-topp vil gi mer til de rike - blir roset        |           | 3       | 0.1%    |
| Venstre-topp vil ta mer fra de rike                     |           | 4       | 0.1%    |
| Venstre-topp vil ta mer fra de rike - blir refset       |           | 2       | 0.0%    |
| Venstre-topp vil ta mer fra de rike - blir roset        |           | 3       | 0.1%    |
| Venstre-topp: Vil innføre eiendomsskatt i alle norske b |           | 1       | 0.0%    |

Advarsel: disse tallene indikerer antall enheter (cases) i datafilen. De kan ikke tolkes som oppsummert statistikk for populasjonen.

# r7selexp2\_selections: Antall artikler respondenten kan velge. Bakgrunnsvariabel til konjunksjonsekspériment r7selexp2.

| Informasjon                    | [Type= diskret] [Format=numeric] [Rekkevidde= 1-3] [Missing=*]                       |         |                   |
|--------------------------------|--------------------------------------------------------------------------------------|---------|-------------------|
| Statistikk [NW/ W]             | [Gyldige=4659 /-] [Ugyldig=30 /-]                                                    |         |                   |
| Instruksjoner til intervjueren | [Velger tilfeldig mellom 1 og 3, hvor mange artikler respondenten skal kunne velge.] |         |                   |
| Verdi                          | Merkelapp                                                                            | Enheter | Prosent           |
| 1                              | 1 sak                                                                                | 1516    | <div></div> 32.5% |
| 2                              | 2 saker                                                                              | 1566    | <div></div> 33.6% |
| 3                              | 3 saker                                                                              | 1577    | <div></div> 33.8% |

# r7selexp2\_selections: Antall artikler respondenten kan velge. Bakgrunnsvariabel til konjunksjonseksperiment r7selexp2.

| Verdi   | Merkelapp | Enheter | Prosent |
|---------|-----------|---------|---------|
| Sysmiss |           | 30      |         |

Advarsel: disse tallene indikerer antall enheter (cases) i datafilen. De kan ikke tolkes som oppsummert statistikk for populasjonen.

# r7selexp2\_sources01: Dikotom: tilfeldig valg om artiklene skal listes med kilder, eller ikke. Bakgrunnsvariabel konjunksjonseksperiment r7selexp2

|                                |                                                                    |
|--------------------------------|--------------------------------------------------------------------|
| Informasjon                    | [Type= diskret] [Format=numeric] [Rekkevidde= 0-1] [Missing=*]     |
| Statistikk [NW/ W]             | [Gyldige=4659 /-] [Ugyldig=30 /-]                                  |
| Instruksjoner til intervjueren | [Velger tilfeldig om artiklene skal vises med kilder, eller ikke.] |

| Verdi   | Merkelapp | Enheter | Prosent           |
|---------|-----------|---------|-------------------|
| 0       | Nei       | 2339    | <div></div> 50.2% |
| 1       | Ja        | 2320    | <div></div> 49.8% |
| Sysmiss |           | 30      |                   |

Advarsel: disse tallene indikerer antall enheter (cases) i datafilen. De kan ikke tolkes som oppsummert statistikk for populasjonen.

# r7selexp2\_sourcesRan\_1: Tilfeldig valgt kilde nr. 1. Bakgrunnsvariabel til konjunksjonseksperiment 7selexp2.

|                                |                                                |
|--------------------------------|------------------------------------------------|
| Informasjon                    | [Type= diskret] [Format=character] [Missing=*] |
| Statistikk [NW/ W]             | [Gyldige=4689 /-] [Ugyldig=0 /-]               |
| Instruksjoner til intervjueren | [Hvis kilder skal listes: kilde nr. 1.]        |

| Verdi             | Merkelapp | Enheter | Prosent           |
|-------------------|-----------|---------|-------------------|
|                   |           | 2369    | <div></div> 50.5% |
| Aftenposten       |           | 326     | <div></div> 7.0%  |
| Dagbladet         |           | 307     | <div></div> 6.5%  |
| Dagens Næringsliv |           | 341     | <div></div> 7.3%  |
| Klassekampen      |           | 302     | <div></div> 6.4%  |
| NRK               |           | 327     | <div></div> 7.0%  |
| TV2               |           | 358     | <div></div> 7.6%  |
| VG                |           | 359     | <div></div> 7.7%  |

Advarsel: disse tallene indikerer antall enheter (cases) i datafilen. De kan ikke tolkes som oppsummert statistikk for populasjonen.

# r7selexp2\_sourcesRan\_2: Tilfeldig valgt kilde nr. 2. Bakgrunnsvariabel til konjunksjonseksperiment 7selexp2.

|                                |                                                |
|--------------------------------|------------------------------------------------|
| Informasjon                    | [Type= diskret] [Format=character] [Missing=*] |
| Statistikk [NW/ W]             | [Gyldige=4689 /-] [Ugyldig=0 /-]               |
| Instruksjoner til intervjueren | [Hvis kilder skal listes: kilde nr. 2.]        |

| Verdi             | Merkelapp | Enheter | Prosent           |
|-------------------|-----------|---------|-------------------|
|                   |           | 2369    | <div></div> 50.5% |
| Aftenposten       |           | 317     | <div></div> 6.8%  |
| Dagbladet         |           | 324     | <div></div> 6.9%  |
| Dagens Næringsliv |           | 352     | <div></div> 7.5%  |
| Klassekampen      |           | 323     | <div></div> 6.9%  |
| NRK               |           | 326     | <div></div> 7.0%  |
| TV2               |           | 350     | <div></div> 7.5%  |

| # r7selexp2_sourcesRan_2: Tilfeldig valgt kilde nr. 2. Bakgrunnsvariabel til konjunksjonsekspirement 7selexp2.                                                                                   |                                                                                                                              |         |                   |
|--------------------------------------------------------------------------------------------------------------------------------------------------------------------------------------------------|------------------------------------------------------------------------------------------------------------------------------|---------|-------------------|
| Verdi                                                                                                                                                                                            | Merkelapp                                                                                                                    | Enheter | Prosent           |
| VG                                                                                                                                                                                               |                                                                                                                              | 328     | <div></div> 7.0%  |
| Advarsel: disse tallene indikerer antall enheter (cases) i datafilen. De kan ikke tolkes som oppsummert statistikk for populasjonen.                                                             |                                                                                                                              |         |                   |
| # r7selexp2_sourcesRan_3: Tilfeldig valgt kilde nr. 3. Bakgrunnsvariabel til konjunksjonsekspirement 7selexp2.                                                                                   |                                                                                                                              |         |                   |
| Informasjon                                                                                                                                                                                      | [Type= diskret] [Format=character] [Missing=*]                                                                               |         |                   |
| Statistikk [NW/ W]                                                                                                                                                                               | [Gyldige=4689 /-] [Ugyldig=0 /-]                                                                                             |         |                   |
| Instruksjoner til intervjueren                                                                                                                                                                   | [Hvis kilder skal listes: kilde nr. 3.]                                                                                      |         |                   |
| Verdi                                                                                                                                                                                            | Merkelapp                                                                                                                    | Enheter | Prosent           |
|                                                                                                                                                                                                  |                                                                                                                              | 2369    | <div></div> 50.5% |
| Aftenposten                                                                                                                                                                                      |                                                                                                                              | 313     | <div></div> 6.7%  |
| Dagbladet                                                                                                                                                                                        |                                                                                                                              | 307     | <div></div> 6.5%  |
| Dagens Næringsliv                                                                                                                                                                                |                                                                                                                              | 339     | <div></div> 7.2%  |
| Klassekampen                                                                                                                                                                                     |                                                                                                                              | 344     | <div></div> 7.3%  |
| NRK                                                                                                                                                                                              |                                                                                                                              | 340     | <div></div> 7.3%  |
| TV2                                                                                                                                                                                              |                                                                                                                              | 350     | <div></div> 7.5%  |
| VG                                                                                                                                                                                               |                                                                                                                              | 327     | <div></div> 7.0%  |
| Advarsel: disse tallene indikerer antall enheter (cases) i datafilen. De kan ikke tolkes som oppsummert statistikk for populasjonen.                                                             |                                                                                                                              |         |                   |
| # r7selexp2_sourcesRan_4: Tilfeldig valgt kilde nr. 4. Bakgrunnsvariabel til konjunksjonsekspirement 7selexp2.                                                                                   |                                                                                                                              |         |                   |
| Informasjon                                                                                                                                                                                      | [Type= diskret] [Format=character] [Missing=*]                                                                               |         |                   |
| Statistikk [NW/ W]                                                                                                                                                                               | [Gyldige=4689 /-] [Ugyldig=0 /-]                                                                                             |         |                   |
| Instruksjoner til intervjueren                                                                                                                                                                   | [Hvis kilder skal listes: kilde nr. 4.]                                                                                      |         |                   |
| Verdi                                                                                                                                                                                            | Merkelapp                                                                                                                    | Enheter | Prosent           |
|                                                                                                                                                                                                  |                                                                                                                              | 2369    | <div></div> 50.5% |
| Aftenposten                                                                                                                                                                                      |                                                                                                                              | 302     | <div></div> 6.4%  |
| Dagbladet                                                                                                                                                                                        |                                                                                                                              | 351     | <div></div> 7.5%  |
| Dagens Næringsliv                                                                                                                                                                                |                                                                                                                              | 346     | <div></div> 7.4%  |
| Klassekampen                                                                                                                                                                                     |                                                                                                                              | 326     | <div></div> 7.0%  |
| NRK                                                                                                                                                                                              |                                                                                                                              | 316     | <div></div> 6.7%  |
| TV2                                                                                                                                                                                              |                                                                                                                              | 363     | <div></div> 7.7%  |
| VG                                                                                                                                                                                               |                                                                                                                              | 316     | <div></div> 6.7%  |
| Advarsel: disse tallene indikerer antall enheter (cases) i datafilen. De kan ikke tolkes som oppsummert statistikk for populasjonen.                                                             |                                                                                                                              |         |                   |
| # r7selexp2_valanceandparty: Velger tilfeldig om artiklene skal inneholde parti og palens, eller hvilken som helst kombinasjon av disse. Bakgrunnsvariabel til konjunksjonsekspirement R7selexp2 |                                                                                                                              |         |                   |
| Informasjon                                                                                                                                                                                      | [Type= diskret] [Format=numeric] [Rekkevidde= 1-4] [Missing=*]                                                               |         |                   |
| Statistikk [NW/ W]                                                                                                                                                                               | [Gyldige=4659 /-] [Ugyldig=30 /-]                                                                                            |         |                   |
| Instruksjoner til intervjueren                                                                                                                                                                   | [Velger tilfeldig hvorvidt respondenten skal eksponeres for valens og parti, eller hvilken som helst kombinasjon av disse .] |         |                   |
| Kommentarer                                                                                                                                                                                      | Dikotom hvorvidt respondenten får overskrifter med valør og parti, og øvrige kombinasjoner.                                  |         |                   |
| Verdi                                                                                                                                                                                            | Merkelapp                                                                                                                    | Enheter | Prosent           |
| 1                                                                                                                                                                                                | Med parti og valør                                                                                                           | 1184    | <div></div> 25.4% |
| 2                                                                                                                                                                                                | Med parti, uten valør                                                                                                        | 1195    | <div></div> 25.6% |

| # r7selexp2_valanceandparty: Velger tilfeldig om artiklene skal inneholde parti og palens, eller hvilken som helst kombinasjon av disse. Bakgrunnsvariabel til konjunksjonseksperiment R7selexp2 |                                                                                                                                                                                                                                                                                                                                                         |         |         |
|--------------------------------------------------------------------------------------------------------------------------------------------------------------------------------------------------|---------------------------------------------------------------------------------------------------------------------------------------------------------------------------------------------------------------------------------------------------------------------------------------------------------------------------------------------------------|---------|---------|
| Verdi                                                                                                                                                                                            | Merkelapp                                                                                                                                                                                                                                                                                                                                               | Enheter | Prosent |
| 3                                                                                                                                                                                                | Uten parti, med valør                                                                                                                                                                                                                                                                                                                                   | 1118    | 24.0%   |
| 4                                                                                                                                                                                                | Uten parti og valør                                                                                                                                                                                                                                                                                                                                     | 1162    | 24.9%   |
| Sysmiss                                                                                                                                                                                          |                                                                                                                                                                                                                                                                                                                                                         | 30      |         |
| Advarsel: disse tallene indikerer antall enheter (cases) i datafilen. De kan ikke tolkes som oppsummert statistikk for populasjonen.                                                             |                                                                                                                                                                                                                                                                                                                                                         |         |         |
| # r7selexp2_headlinesRan_1: Tilfeldig valgt artikkeloverskrift nr. 1. Bakgrunnsvariabel til konjunksjonseksperiment r7selexp2.                                                                   |                                                                                                                                                                                                                                                                                                                                                         |         |         |
| Informasjon                                                                                                                                                                                      | [Type= diskret] [Format=character] [Missing=*]                                                                                                                                                                                                                                                                                                          |         |         |
| Statistikk [NW/ W]                                                                                                                                                                               | [Gyldige=4689 /-] [Ugyldig=0 /-]                                                                                                                                                                                                                                                                                                                        |         |         |
| Instruksjoner til intervjueren                                                                                                                                                                   | [Lagrer en tilfeldig valgt nyhetsartikkel fra en stor populasjon av artikler. Kontakt Sveinung Arnesen eller Mikael Johannesson for den fullstendige listen.]                                                                                                                                                                                           |         |         |
| # r7selexp2_headlinesRan_2: Tilfeldig valgt artikkeloverskrift nr. 2. Bakgrunnsvariabel til konjunksjonseksperiment r7selexp2.                                                                   |                                                                                                                                                                                                                                                                                                                                                         |         |         |
| Informasjon                                                                                                                                                                                      | [Type= diskret] [Format=character] [Missing=*]                                                                                                                                                                                                                                                                                                          |         |         |
| Statistikk [NW/ W]                                                                                                                                                                               | [Gyldige=4689 /-] [Ugyldig=0 /-]                                                                                                                                                                                                                                                                                                                        |         |         |
| Instruksjoner til intervjueren                                                                                                                                                                   | [Lagrer en tilfeldig valgt nyhetsartikkel fra en stor populasjon av artikler. Kontakt Sveinung Arnesen eller Mikael Johannesson for den fullstendige listen. .]                                                                                                                                                                                         |         |         |
| # r7selexp2_headlinesRan_3: Tilfeldig valgt artikkeloverskrift nr. 3. Bakgrunnsvariabel til konjunksjonseksperiment r7selexp2.                                                                   |                                                                                                                                                                                                                                                                                                                                                         |         |         |
| Informasjon                                                                                                                                                                                      | [Type= diskret] [Format=character] [Missing=*]                                                                                                                                                                                                                                                                                                          |         |         |
| Statistikk [NW/ W]                                                                                                                                                                               | [Gyldige=4689 /-] [Ugyldig=0 /-]                                                                                                                                                                                                                                                                                                                        |         |         |
| Instruksjoner til intervjueren                                                                                                                                                                   | [Lagrer en tilfeldig valgt nyhetsartikkel fra en stor populasjon av artikler. Kontakt Sveinung Arnesen eller Mikael Johannesson for den fullstendige listen. .]                                                                                                                                                                                         |         |         |
| # r7selexp2_headlinesRan_4: Tilfeldig valgt artikkeloverskrift nr. 4. Bakgrunnsvariabel til konjunksjonseksperiment r7selexp2.                                                                   |                                                                                                                                                                                                                                                                                                                                                         |         |         |
| Informasjon                                                                                                                                                                                      | [Type= diskret] [Format=character] [Missing=*]                                                                                                                                                                                                                                                                                                          |         |         |
| Statistikk [NW/ W]                                                                                                                                                                               | [Gyldige=4689 /-] [Ugyldig=0 /-]                                                                                                                                                                                                                                                                                                                        |         |         |
| Instruksjoner til intervjueren                                                                                                                                                                   | [Lagrer en tilfeldig valgt nyhetsartikkel fra en stor populasjon av artikler. Kontakt Sveinung Arnesen eller Mikael Johannesson for den fullstendige listen. .]                                                                                                                                                                                         |         |         |
| # r7pad14_4rows_1: Artikkel 1. En liste over tilfeldig valgte artikler hvor respondentene skal velge hvilke de vil lese. Konjunksjonseksperiment.                                                |                                                                                                                                                                                                                                                                                                                                                         |         |         |
| Informasjon                                                                                                                                                                                      | [Type= diskret] [Format=numeric] [Rekkevidde= 1-1] [Missing=*]                                                                                                                                                                                                                                                                                          |         |         |
| Statistikk [NW/ W]                                                                                                                                                                               | [Gyldige=4689 /-] [Ugyldig=0 /-]                                                                                                                                                                                                                                                                                                                        |         |         |
| Tekst før spørsmål                                                                                                                                                                               | Vi ønsker å studere hvilke mediesaker folk leser. Under er noen tenkte saker vi har laget som minner om de man kan finne i norske nettaviser. Vennligst les alle overskriftene nøye og se for deg at sakene er ekte.                                                                                                                                    |         |         |
| Spørsmålstekst                                                                                                                                                                                   | Hvis du var nødt til å lese [1 sak /2 saker /3 saker], [hvilken sak /hvilke saker] ville foretrukket å bruke tiden din på?<br><br>[Her følger en liste over tilfeldig valgte artikler. Se bakgrunnsvariabler.]                                                                                                                                          |         |         |
| Instruksjoner til intervjueren                                                                                                                                                                   | [Spurt hvis R7PAD14_version=1. Konjunksjons-eksperiment. Respondenten blir eksponert for 4 tilfeldige nyhetsartikler. Artikkelen har et sett av tilfeldig valgte karakteristikker. R7PAD14_version velger tilfeldig om respondenten skal eksponeres for 4 eller 6 artikler. R7PAD14 og R7SELEXP2 blir stilt i tilfeldig rekkefølge. Se R7SELEXP_order.] |         |         |
| Kommentarer                                                                                                                                                                                      | ^f('R7PAD14_body')[1]^ (Vi ønsker å studere hvilke mediesaker folk leser. Under er noen tenkte saker vi har laget som                                                                                                                                                                                                                                   |         |         |
| Verdi                                                                                                                                                                                            | Merkelapp                                                                                                                                                                                                                                                                                                                                               | Enheter | Prosent |
| 0                                                                                                                                                                                                |                                                                                                                                                                                                                                                                                                                                                         | 831     | 17.7%   |
| 1                                                                                                                                                                                                | Artikkel valgt av respondent                                                                                                                                                                                                                                                                                                                            | 743     | 15.8%   |

|                                                                                                                                                   |                                                                                                                                                                                                                                                                                                                                                        |         |                              |
|---------------------------------------------------------------------------------------------------------------------------------------------------|--------------------------------------------------------------------------------------------------------------------------------------------------------------------------------------------------------------------------------------------------------------------------------------------------------------------------------------------------------|---------|------------------------------|
| # r7pad14_4rows_1: Artikkel 1. En liste over tilfeldig valgte artikler hvor respondentene skal velge hvilke de vil lese. Konjunksjonseksperiment. |                                                                                                                                                                                                                                                                                                                                                        |         |                              |
| Verdi                                                                                                                                             | Merkelapp                                                                                                                                                                                                                                                                                                                                              | Enheter | Prosent                      |
| 97                                                                                                                                                | Ikke svart                                                                                                                                                                                                                                                                                                                                             | 2       | 0.0%                         |
| 98                                                                                                                                                | Ikke spurt                                                                                                                                                                                                                                                                                                                                             | 3113    | <div><div></div></div> 66.4% |
| Advarsel: disse tallene indikerer antall enheter (cases) i datafilen. De kan ikke tolkes som oppsummert statistikk for populasjonen.              |                                                                                                                                                                                                                                                                                                                                                        |         |                              |
| # r7pad14_4rows_2: Artikkel 2. En liste over tilfeldig valgte artikler hvor respondentene skal velge hvilke de vil lese. Konjunksjonseksperiment. |                                                                                                                                                                                                                                                                                                                                                        |         |                              |
| Informasjon                                                                                                                                       | [Type= diskret] [Format=numeric] [Rekkevidde= 1-1] [Missing=*]                                                                                                                                                                                                                                                                                         |         |                              |
| Statistikk [NW/ W]                                                                                                                                | [Gyldige=4689 /-] [Ugyldig=0 /-]                                                                                                                                                                                                                                                                                                                       |         |                              |
| Tekst før spørsmål                                                                                                                                | Vi ønsker å studere hvilke mediasaker folk leser. Under er noen tenkte saker vi har laget som minner om de man kan finne i norske nettaviser. Vennligst les alle overskriftene nøye og se for deg at sakene er ekte.                                                                                                                                   |         |                              |
| Spørsmålstekst                                                                                                                                    | Hvis du var nødt til å lese [1 sak /2 saker /3 saker], [hvilken sak /hvilke saker] ville foretrukket å bruke tiden din på?<br><br>[Her følger en liste over tilfeldig valgte artikler. Se bakgrunnsvariabler.]                                                                                                                                         |         |                              |
| Instruksjoner til intervjueren                                                                                                                    | [Spurt hvis R7PAD14_version=1. Konjunksjons-eksperiment. Respondenten blir eksponert for 4 tilfeldige nyhetsartikler. Artikkelen har et sett av tilfeldig valgte karakteristikk. R7PAD14_version velger tilfeldig om respondenten skal eksponeres for 4 eller 6 artikler. R7PAD14 og R7SELEXP2 blir stilt i tilfeldig rekkefølge. Se R7SELEXP_order. ] |         |                              |
| Kommentarer                                                                                                                                       | ^f('R7PAD14_body')[2]^ (Vi ønsker å studere hvilke mediasaker folk leser. Under er noen tenkte saker vi har laget som                                                                                                                                                                                                                                  |         |                              |
| Verdi                                                                                                                                             | Merkelapp                                                                                                                                                                                                                                                                                                                                              | Enheter | Prosent                      |
| 0                                                                                                                                                 |                                                                                                                                                                                                                                                                                                                                                        | 803     | <div><div></div></div> 17.1% |
| 1                                                                                                                                                 | Artikkel valgt av respondent                                                                                                                                                                                                                                                                                                                           | 771     | <div><div></div></div> 16.4% |
| 97                                                                                                                                                | Ikke svart                                                                                                                                                                                                                                                                                                                                             | 2       | 0.0%                         |
| 98                                                                                                                                                | Ikke spurt                                                                                                                                                                                                                                                                                                                                             | 3113    | <div><div></div></div> 66.4% |
| Advarsel: disse tallene indikerer antall enheter (cases) i datafilen. De kan ikke tolkes som oppsummert statistikk for populasjonen.              |                                                                                                                                                                                                                                                                                                                                                        |         |                              |
| # r7pad14_4rows_3: Artikkel 3. En liste over tilfeldig valgte artikler hvor respondentene skal velge hvilke de vil lese. Konjunksjonseksperiment. |                                                                                                                                                                                                                                                                                                                                                        |         |                              |
| Informasjon                                                                                                                                       | [Type= diskret] [Format=numeric] [Rekkevidde= 1-1] [Missing=*]                                                                                                                                                                                                                                                                                         |         |                              |
| Statistikk [NW/ W]                                                                                                                                | [Gyldige=4689 /-] [Ugyldig=0 /-]                                                                                                                                                                                                                                                                                                                       |         |                              |
| Tekst før spørsmål                                                                                                                                | Vi ønsker å studere hvilke mediasaker folk leser. Under er noen tenkte saker vi har laget som minner om de man kan finne i norske nettaviser. Vennligst les alle overskriftene nøye og se for deg at sakene er ekte.                                                                                                                                   |         |                              |
| Spørsmålstekst                                                                                                                                    | Hvis du var nødt til å lese [1 sak /2 saker /3 saker], [hvilken sak /hvilke saker] ville foretrukket å bruke tiden din på?<br><br>[Her følger en liste over tilfeldig valgte artikler. Se bakgrunnsvariabler.]                                                                                                                                         |         |                              |
| Instruksjoner til intervjueren                                                                                                                    | [Spurt hvis R7PAD14_version=1. Konjunksjons-eksperiment. Respondenten blir eksponert for 4 tilfeldige nyhetsartikler. Artikkelen har et sett av tilfeldig valgte karakteristikk. R7PAD14_version velger tilfeldig om respondenten skal eksponeres for 4 eller 6 artikler. R7PAD14 og R7SELEXP2 blir stilt i tilfeldig rekkefølge. Se R7SELEXP_order.]  |         |                              |
| Kommentarer                                                                                                                                       | ^f('R7PAD14_body')[3]^ (Vi ønsker å studere hvilke mediasaker folk leser. Under er noen tenkte saker vi har laget som                                                                                                                                                                                                                                  |         |                              |
| Verdi                                                                                                                                             | Merkelapp                                                                                                                                                                                                                                                                                                                                              | Enheter | Prosent                      |
| 0                                                                                                                                                 |                                                                                                                                                                                                                                                                                                                                                        | 813     | <div><div></div></div> 17.3% |
| 1                                                                                                                                                 | Artikkel valgt av respondent                                                                                                                                                                                                                                                                                                                           | 761     | <div><div></div></div> 16.2% |
| 97                                                                                                                                                | Ikke svart                                                                                                                                                                                                                                                                                                                                             | 2       | 0.0%                         |
| 98                                                                                                                                                | Ikke spurt                                                                                                                                                                                                                                                                                                                                             | 3113    | <div><div></div></div> 66.4% |
| Advarsel: disse tallene indikerer antall enheter (cases) i datafilen. De kan ikke tolkes som oppsummert statistikk for populasjonen.              |                                                                                                                                                                                                                                                                                                                                                        |         |                              |
| # r7pad14_4rows_4: Artikkel 4. En liste over tilfeldig valgte artikler hvor respondentene skal velge hvilke de vil lese. Konjunksjonseksperiment. |                                                                                                                                                                                                                                                                                                                                                        |         |                              |
| Informasjon                                                                                                                                       | [Type= diskret] [Format=numeric] [Rekkevidde= 1-1] [Missing=*]                                                                                                                                                                                                                                                                                         |         |                              |
| Statistikk [NW/ W]                                                                                                                                | [Gyldige=4689 /-] [Ugyldig=0 /-]                                                                                                                                                                                                                                                                                                                       |         |                              |



**# r7pad14\_4rows\_4: Artikkel 4. En liste over tilfeldig valgte artikler hvor respondentene skal velge hvilke de vil lese. Konjunksjonseksperiment.**

|                                       |                                                                                                                                                                                                                                                                                                                                                       |
|---------------------------------------|-------------------------------------------------------------------------------------------------------------------------------------------------------------------------------------------------------------------------------------------------------------------------------------------------------------------------------------------------------|
| <b>Tekst før spørsmål</b>             | Vi ønsker å studere hvilke mediasaker folk leser. Under er noen tenkte saker vi har laget som minner om de man kan finne i norske nettaviser. Vennligst les alle overskriftene nøye og se for deg at sakene er ekte.                                                                                                                                  |
| <b>Spørsmålstekst</b>                 | Hvis du var nødt til å lese [1 sak /2 saker /3 saker], [hvilken sak /hvilke saker] ville foretrukket å bruke tiden din på?<br><br>[Her følger en liste over tilfeldig valgte artikler. Se bakgrunnsvariabler.]                                                                                                                                        |
| <b>Instruksjoner til intervjueren</b> | [Spurt hvis R7PAD14_version=1. Konjunksjons-eksperiment. Respondenten blir eksponert for 4 tilfeldige nyhetsartikler. Artikkelen har et sett av tilfeldig valgte karakteristikk. R7PAD14_version velger tilfeldig om respondenten skal eksponeres for 4 eller 6 artikler. R7PAD14 og R7SELEXP2 blir stilt i tilfeldig rekkefølge. Se R7SELEXP_order.] |
| <b>Kommentarer</b>                    | ^f('R7PAD14_body')['4']^ (Vi ønsker å studere hvilke mediasaker folk leser. Under er noen tenkte saker vi har laget som                                                                                                                                                                                                                               |

| Verdi | Merkelapp                    | Enheter | Prosent           |
|-------|------------------------------|---------|-------------------|
| 0     |                              | 768     | <div></div> 16.4% |
| 1     | Artikkel valgt av respondent | 806     | <div></div> 17.2% |
| 97    | Ikke svart                   | 2       | <div></div> 0.0%  |
| 98    | Ikke spurt                   | 3113    | <div></div> 66.4% |

*Advarsel: disse tallene indikerer antall enheter (cases) i datafilen. De kan ikke tolkes som oppsummert statistikk for populasjonen.*

**# r7pad14\_6rows\_1: Artikkel 1. En liste over tilfeldig valgte artikler hvor respondentene skal velge hvilke de vil lese. Konjunksjonseksperiment.**

|                                       |                                                                                                                                                                                                                                                                                                                                                                          |
|---------------------------------------|--------------------------------------------------------------------------------------------------------------------------------------------------------------------------------------------------------------------------------------------------------------------------------------------------------------------------------------------------------------------------|
| <b>Informasjon</b>                    | [Type= diskret] [Format=numeric] [Rekkevidde= 1-1] [Missing=*]                                                                                                                                                                                                                                                                                                           |
| <b>Statistikk [NW/ W]</b>             | [Gyldige=4689 /-] [Ugyldig=0 /-]                                                                                                                                                                                                                                                                                                                                         |
| <b>Tekst før spørsmål</b>             | Vi ønsker å studere hvilke mediasaker folk leser. Under er noen tenkte saker vi har laget som minner om de man kan finne i norske nettaviser. Vennligst les alle overskriftene nøye og se for deg at sakene er ekte.                                                                                                                                                     |
| <b>Spørsmålstekst</b>                 | Hvis du var nødt til å lese [1 sak /2 saker /3 saker], [hvilken sak /hvilke saker] ville foretrukket å bruke tiden din på?<br><br>[Her følger en liste over tilfeldig valgte artikler. Se bakgrunnsvariabler.]                                                                                                                                                           |
| <b>Instruksjoner til intervjueren</b> | [Spurt hvis R7PAD14_version=1. Konjunksjons-eksperiment. Respondenten blir eksponert for 6 tilfeldige nyhets- og underholdningsartikler. Artikkelen har et sett av tilfeldig valgte karakteristikk. R7PAD14_version velger tilfeldig om respondenten skal eksponeres for 4 eller 6 artikler. R7PAD14 og R7SELEXP2 blir stilt i tilfeldig rekkefølge. Se R7SELEXP_order.] |
| <b>Kommentarer</b>                    | ^f('R7PAD14_body')['1']^ (Vi ønsker å studere hvilke mediasaker folk leser. Under er noen tenkte saker vi har laget som                                                                                                                                                                                                                                                  |

| Verdi | Merkelapp                    | Enheter | Prosent           |
|-------|------------------------------|---------|-------------------|
| 0     |                              | 2043    | <div></div> 43.6% |
| 1     | Artikkel valgt av respondent | 1036    | <div></div> 22.1% |
| 97    | Ikke svart                   | 0       | <div></div>       |
| 98    | Ikke spurt                   | 1610    | <div></div> 34.3% |

*Advarsel: disse tallene indikerer antall enheter (cases) i datafilen. De kan ikke tolkes som oppsummert statistikk for populasjonen.*

**# r7pad14\_6rows\_2: Artikkel 2. En liste over tilfeldig valgte artikler hvor respondentene skal velge hvilke de vil lese. Konjunksjonseksperiment.**

|                                       |                                                                                                                                                                                                                                                                                                                                                                          |
|---------------------------------------|--------------------------------------------------------------------------------------------------------------------------------------------------------------------------------------------------------------------------------------------------------------------------------------------------------------------------------------------------------------------------|
| <b>Informasjon</b>                    | [Type= diskret] [Format=numeric] [Rekkevidde= 1-1] [Missing=*]                                                                                                                                                                                                                                                                                                           |
| <b>Statistikk [NW/ W]</b>             | [Gyldige=4689 /-] [Ugyldig=0 /-]                                                                                                                                                                                                                                                                                                                                         |
| <b>Tekst før spørsmål</b>             | Vi ønsker å studere hvilke mediasaker folk leser. Under er noen tenkte saker vi har laget som minner om de man kan finne i norske nettaviser. Vennligst les alle overskriftene nøye og se for deg at sakene er ekte.                                                                                                                                                     |
| <b>Spørsmålstekst</b>                 | Hvis du var nødt til å lese [1 sak /2 saker /3 saker], [hvilken sak /hvilke saker] ville foretrukket å bruke tiden din på?<br><br>[Her følger en liste over tilfeldig valgte artikler. Se bakgrunnsvariabler.]                                                                                                                                                           |
| <b>Instruksjoner til intervjueren</b> | [Spurt hvis R7PAD14_version=1. Konjunksjons-eksperiment. Respondenten blir eksponert for 6 tilfeldige nyhets- og underholdningsartikler. Artikkelen har et sett av tilfeldig valgte karakteristikk. R7PAD14_version velger tilfeldig om respondenten skal eksponeres for 4 eller 6 artikler. R7PAD14 og R7SELEXP2 blir stilt i tilfeldig rekkefølge. Se R7SELEXP_order.] |

## # r7pad14\_grows\_2: Artikkel 2. En liste over tilfeldig valgte artikler hvor respondentene skal velge hvilke de vil lese. Konjunksjonseksperiment.

|                    |                                                                                                                         |                |                              |
|--------------------|-------------------------------------------------------------------------------------------------------------------------|----------------|------------------------------|
| <b>Kommentarer</b> | ^f('R7PAD14_body')['2']^ (Vi ønsker å studere hvilke mediasaker folk leser. Under er noen tenkte saker vi har laget som |                |                              |
| <b>Verdi</b>       | <b>Merkelapp</b>                                                                                                        | <b>Enheter</b> | <b>Prosent</b>               |
| 0                  |                                                                                                                         | 2112           | <div><div></div></div> 45.0% |
| 1                  | Artikkel valgt av respondent                                                                                            | 967            | <div><div></div></div> 20.6% |
| 97                 | Ikke svart                                                                                                              | 4              | 0.1%                         |
| 98                 | Ikke spurt                                                                                                              | 1606           | <div><div></div></div> 34.3% |

Advarsel: disse tallene indikerer antall enheter (cases) i datafilen. De kan ikke tolkes som oppsummert statistikk for populasjonen.

## # r7pad14\_grows\_3: Artikkel 3. En liste over tilfeldig valgte artikler hvor respondentene skal velge hvilke de vil lese. Konjunksjonseksperiment.

|                                       |                                                                                                                                                                                                                                                                                                                                                                          |  |  |
|---------------------------------------|--------------------------------------------------------------------------------------------------------------------------------------------------------------------------------------------------------------------------------------------------------------------------------------------------------------------------------------------------------------------------|--|--|
| <b>Informasjon</b>                    | [Type= diskret] [Format=numeric] [Rekkevidde= 1-1] [Missing=*]                                                                                                                                                                                                                                                                                                           |  |  |
| <b>Statistikk [NW/ W]</b>             | [Gyldige=4689 /-] [Ugyldig=0 /-]                                                                                                                                                                                                                                                                                                                                         |  |  |
| <b>Tekst før spørsmål</b>             | Vi ønsker å studere hvilke mediasaker folk leser. Under er noen tenkte saker vi har laget som minner om de man kan finne i norske nettaviser. Vennligst les alle overskriftene nøye og se for deg at sakene er ekte.                                                                                                                                                     |  |  |
| <b>Spørsmålstekst</b>                 | Hvis du var nødt til å lese [1 sak /2 saker /3 saker], [hvilken sak /hvilke saker] ville foretrukket å bruke tiden din på?<br><br>[Her følger en liste over tilfeldig valgte artikler. Se bakgrunnsvariabler.]                                                                                                                                                           |  |  |
| <b>Instruksjoner til intervjueren</b> | [Spurt hvis R7PAD14_version=1. Konjunksjons-eksperiment. Respondenten blir eksponert for 6 tilfeldige nyhets- og underholdningsartikler. Artikkelen har et sett av tilfeldig valgte karakteristikk. R7PAD14_version velger tilfeldig om respondenten skal eksponeres for 4 eller 6 artikler. R7PAD14 og R7SELEXP2 blir stilt i tilfeldig rekkefølge. Se R7SELEXP_order.] |  |  |
| <b>Kommentarer</b>                    | ^f('R7PAD14_body')['3']^ (Vi ønsker å studere hvilke mediasaker folk leser. Under er noen tenkte saker vi har laget som                                                                                                                                                                                                                                                  |  |  |

|              |                              |                |                              |
|--------------|------------------------------|----------------|------------------------------|
| <b>Verdi</b> | <b>Merkelapp</b>             | <b>Enheter</b> | <b>Prosent</b>               |
| 0            |                              | 2078           | <div><div></div></div> 44.3% |
| 1            | Artikkel valgt av respondent | 1001           | <div><div></div></div> 21.3% |
| 97           | Ikke svart                   | 4              | 0.1%                         |
| 98           | Ikke spurt                   | 1606           | <div><div></div></div> 34.3% |

Advarsel: disse tallene indikerer antall enheter (cases) i datafilen. De kan ikke tolkes som oppsummert statistikk for populasjonen.

## # r7pad14\_grows\_4: Artikkel 4. En liste over tilfeldig valgte artikler hvor respondentene skal velge hvilke de vil lese. Konjunksjonseksperiment.

|                                       |                                                                                                                                                                                                                                                                                                                                                                          |  |  |
|---------------------------------------|--------------------------------------------------------------------------------------------------------------------------------------------------------------------------------------------------------------------------------------------------------------------------------------------------------------------------------------------------------------------------|--|--|
| <b>Informasjon</b>                    | [Type= diskret] [Format=numeric] [Rekkevidde= 1-1] [Missing=*]                                                                                                                                                                                                                                                                                                           |  |  |
| <b>Statistikk [NW/ W]</b>             | [Gyldige=4689 /-] [Ugyldig=0 /-]                                                                                                                                                                                                                                                                                                                                         |  |  |
| <b>Tekst før spørsmål</b>             | Vi ønsker å studere hvilke mediasaker folk leser. Under er noen tenkte saker vi har laget som minner om de man kan finne i norske nettaviser. Vennligst les alle overskriftene nøye og se for deg at sakene er ekte.                                                                                                                                                     |  |  |
| <b>Spørsmålstekst</b>                 | Hvis du var nødt til å lese [1 sak /2 saker /3 saker], [hvilken sak /hvilke saker] ville foretrukket å bruke tiden din på?<br><br>[Her følger en liste over tilfeldig valgte artikler. Se bakgrunnsvariabler.]                                                                                                                                                           |  |  |
| <b>Instruksjoner til intervjueren</b> | [Spurt hvis R7PAD14_version=1. Konjunksjons-eksperiment. Respondenten blir eksponert for 6 tilfeldige nyhets- og underholdningsartikler. Artikkelen har et sett av tilfeldig valgte karakteristikk. R7PAD14_version velger tilfeldig om respondenten skal eksponeres for 4 eller 6 artikler. R7PAD14 og R7SELEXP2 blir stilt i tilfeldig rekkefølge. Se R7SELEXP_order.] |  |  |
| <b>Kommentarer</b>                    | ^f('R7PAD14_body')['4']^ (Vi ønsker å studere hvilke mediasaker folk leser. Under er noen tenkte saker vi har laget som                                                                                                                                                                                                                                                  |  |  |

|              |                              |                |                              |
|--------------|------------------------------|----------------|------------------------------|
| <b>Verdi</b> | <b>Merkelapp</b>             | <b>Enheter</b> | <b>Prosent</b>               |
| 0            |                              | 2079           | <div><div></div></div> 44.3% |
| 1            | Artikkel valgt av respondent | 1000           | <div><div></div></div> 21.3% |
| 97           | Ikke svart                   | 4              | 0.1%                         |
| 98           | Ikke spurt                   | 1606           | <div><div></div></div> 34.3% |

Advarsel: disse tallene indikerer antall enheter (cases) i datafilen. De kan ikke tolkes som oppsummert statistikk for populasjonen.

**# r7pad14\_grows\_5: Artikkel 5. En liste over tilfeldig valgte artikler hvor respondentene skal velge hvilke de vil lese. Konjunksjonseksperiment.**

|                                       |                                                                                                                                                                                                                                                                                                                                                                          |
|---------------------------------------|--------------------------------------------------------------------------------------------------------------------------------------------------------------------------------------------------------------------------------------------------------------------------------------------------------------------------------------------------------------------------|
| <b>Informasjon</b>                    | [Type= diskret] [Format=numeric] [Rekkevidde= 1-1] [Missing=*]                                                                                                                                                                                                                                                                                                           |
| <b>Statistikk [NW/ W]</b>             | [Gyldige=4689 /-] [Ugyldig=0 /-]                                                                                                                                                                                                                                                                                                                                         |
| <b>Tekst før spørsmål</b>             | Vi ønsker å studere hvilke mediasaker folk leser. Under er noen tenkte saker vi har laget som minner om de man kan finne i norske nettaviser. Vennligst les alle overskriftene nøye og se for deg at sakene er ekte.                                                                                                                                                     |
| <b>Spørsmålstekst</b>                 | Hvis du var nødt til å lese [1 sak /2 saker /3 saker], [hvilken sak /hvilke saker] ville foretrukket å bruke tiden din på?<br><br>[Her følger en liste over tilfeldig valgte artikler. Se bakgrunnsvariabler.]                                                                                                                                                           |
| <b>Instruksjoner til intervjueren</b> | [Spurt hvis R7PAD14_version=1. Konjunksjons-eksperiment. Respondenten blir eksponert for 6 tilfeldige nyhets- og underholdningsartikler. Artikkelen har et sett av tilfeldig valgte karakteristikk. R7PAD14_version velger tilfeldig om respondenten skal eksponeres for 4 eller 6 artikler. R7PAD14 og R7SELEXP2 blir stilt i tilfeldig rekkefølge. Se R7SELEXP_order.] |
| <b>Kommentarer</b>                    | ^f('R7PAD14_body')['5']^ (Vi ønsker å studere hvilke mediasaker folk leser. Under er noen tenkte saker vi har laget som                                                                                                                                                                                                                                                  |

| Verdi | Merkelapp                    | Enheter | Prosent           |
|-------|------------------------------|---------|-------------------|
| 0     |                              | 2147    | <div></div> 45.8% |
| 1     | Artikkel valgt av respondent | 932     | <div></div> 19.9% |
| 97    | Ikke svart                   | 4       | <div></div> 0.1%  |
| 98    | Ikke spurt                   | 1606    | <div></div> 34.3% |

Advarsel: disse tallene indikerer antall enheter (cases) i datafilen. De kan ikke tolkes som oppsummert statistikk for populasjonen.

**# r7pad14\_grows\_6: Artikkel 6. En liste over tilfeldig valgte artikler hvor respondentene skal velge hvilke de vil lese. Konjunksjonseksperiment.**

|                                       |                                                                                                                                                                                                                                                                                                                                                                          |
|---------------------------------------|--------------------------------------------------------------------------------------------------------------------------------------------------------------------------------------------------------------------------------------------------------------------------------------------------------------------------------------------------------------------------|
| <b>Informasjon</b>                    | [Type= diskret] [Format=numeric] [Rekkevidde= 1-1] [Missing=*]                                                                                                                                                                                                                                                                                                           |
| <b>Statistikk [NW/ W]</b>             | [Gyldige=4689 /-] [Ugyldig=0 /-]                                                                                                                                                                                                                                                                                                                                         |
| <b>Tekst før spørsmål</b>             | Vi ønsker å studere hvilke mediasaker folk leser. Under er noen tenkte saker vi har laget som minner om de man kan finne i norske nettaviser. Vennligst les alle overskriftene nøye og se for deg at sakene er ekte.                                                                                                                                                     |
| <b>Spørsmålstekst</b>                 | Hvis du var nødt til å lese [1 sak /2 saker /3 saker], [hvilken sak /hvilke saker] ville foretrukket å bruke tiden din på?<br><br>[Her følger en liste over tilfeldig valgte artikler. Se bakgrunnsvariabler.]                                                                                                                                                           |
| <b>Instruksjoner til intervjueren</b> | [Spurt hvis R7PAD14_version=1. Konjunksjons-eksperiment. Respondenten blir eksponert for 6 tilfeldige nyhets- og underholdningsartikler. Artikkelen har et sett av tilfeldig valgte karakteristikk. R7PAD14_version velger tilfeldig om respondenten skal eksponeres for 4 eller 6 artikler. R7PAD14 og R7SELEXP2 blir stilt i tilfeldig rekkefølge. Se R7SELEXP_order.] |
| <b>Kommentarer</b>                    | ^f('R7PAD14_body')['6']^ (Vi ønsker å studere hvilke mediasaker folk leser. Under er noen tenkte saker vi har laget som                                                                                                                                                                                                                                                  |

| Verdi | Merkelapp                    | Enheter | Prosent           |
|-------|------------------------------|---------|-------------------|
| 0     |                              | 2066    | <div></div> 44.1% |
| 1     | Artikkel valgt av respondent | 1013    | <div></div> 21.6% |
| 97    | Ikke svart                   | 4       | <div></div> 0.1%  |
| 98    | Ikke spurt                   | 1606    | <div></div> 34.3% |

Advarsel: disse tallene indikerer antall enheter (cases) i datafilen. De kan ikke tolkes som oppsummert statistikk for populasjonen.

**# r7selexp2\_1: Artikkel 1. En liste over tilfeldig valgte artikler hvor respondentene skal velge hvilke de vil lese. Konjunksjonseksperiment.**

|                           |                                                                                                                                                                                                                      |
|---------------------------|----------------------------------------------------------------------------------------------------------------------------------------------------------------------------------------------------------------------|
| <b>Informasjon</b>        | [Type= diskret] [Format=numeric] [Rekkevidde= 1-1] [Missing=*]                                                                                                                                                       |
| <b>Statistikk [NW/ W]</b> | [Gyldige=4689 /-] [Ugyldig=0 /-]                                                                                                                                                                                     |
| <b>Tekst før spørsmål</b> | Vi ønsker å studere hvilke mediasaker folk leser. Under er noen tenkte saker vi har laget som minner om de man kan finne i norske nettaviser. Vennligst les alle overskriftene nøye og se for deg at sakene er ekte. |
| <b>Spørsmålstekst</b>     | Hvis du var nødt til å lese [1 sak /2 saker /3 saker], [hvilken sak /hvilke saker] ville du foretrukket å bruke tiden din på?<br><br>[Her følger en liste over tilfeldig valgte artikler. Se bakgrunnsvariabler.]    |

| # r7selexp2_1: Artikkel 1. En liste over tilfeldig valgte artikler hvor respondentene skal velge hvilke de vil lese. Konjunksjonseksperiment. |                                                                                                                                                                                                                                                       |         |                              |
|-----------------------------------------------------------------------------------------------------------------------------------------------|-------------------------------------------------------------------------------------------------------------------------------------------------------------------------------------------------------------------------------------------------------|---------|------------------------------|
| Instruksjoner til intervjueren                                                                                                                | [Alle respondenter spurt. Konjunksjons-eksperiment. Responenten blir eksponert for et sett av tilfeldig valgte artikler. Artiklene har tilfeldig valgte karakteristika. R7PAD14 og R7SELEXP2 blir stilt i tilfeldig rekkefølge. Se R7SELEXP_order.]   |         |                              |
| Kommentarer                                                                                                                                   | ^f('R7SELEXP2_body')[1]^ (Vi ønsker å studere hvilke mediasaker folk leser. Under er noen tenkte saker vi har laget s                                                                                                                                 |         |                              |
| Verdi                                                                                                                                         | Merkelapp                                                                                                                                                                                                                                             | Enheter | Prosent                      |
| 0                                                                                                                                             |                                                                                                                                                                                                                                                       | 2415    | <div><div></div></div> 51.5% |
| 1                                                                                                                                             | Artikkel valgt av respondent                                                                                                                                                                                                                          | 2236    | <div><div></div></div> 47.7% |
| 97                                                                                                                                            | Ikke svart                                                                                                                                                                                                                                            | 38      | <div><div></div></div> 0.8%  |
| Advarsel: disse tallene indikerer antall enheter (cases) i datafilen. De kan ikke tolkes som oppsummert statistikk for populasjonen.          |                                                                                                                                                                                                                                                       |         |                              |
| # r7selexp2_2: Artikkel 2. En liste over tilfeldig valgte artikler hvor respondentene skal velge hvilke de vil lese. Konjunksjonseksperiment. |                                                                                                                                                                                                                                                       |         |                              |
| Informasjon                                                                                                                                   | [Type= diskret] [Format=numeric] [Rekkevidde= 1-1] [Missing=*]                                                                                                                                                                                        |         |                              |
| Statistikk [NW/ W]                                                                                                                            | [Gyldige=4689 /-] [Ugyldig=0 /-]                                                                                                                                                                                                                      |         |                              |
| Tekst før spørsmål                                                                                                                            | Vi ønsker å studere hvilke mediasaker folk leser. Under er noen tenkte saker vi har laget som minner om de man kan finne i norske nettaviser. Vennligst les alle overskriftene nøye og se for deg at sakene er ekte.                                  |         |                              |
| Spørsmålstekst                                                                                                                                | Hvis du var nødt til å lese [1 sak /2 saker /3 saker], [hvilken sak /hvilke saker] ville du foretrukket å bruke tiden din på?<br><br>[Her følger en liste over tilfeldig valgte artikler. Se bakgrunnsvariabler.]                                     |         |                              |
| Instruksjoner til intervjueren                                                                                                                | [Alle respondenter spurt. Konjunksjons-eksperiment. Responenten blir eksponert for et sett av tilfeldig valgte artikler. Artiklene har tilfeldig valgte karakteristika. R7PAD14 og R7SELEXP2 blir stilt i tilfeldig rekkefølge. Se R7SELEXP_order. .] |         |                              |
| Kommentarer                                                                                                                                   | ^f('R7SELEXP2_body')[2]^ (Vi ønsker å studere hvilke mediasaker folk leser. Under er noen tenkte saker vi har laget s                                                                                                                                 |         |                              |
| Verdi                                                                                                                                         | Merkelapp                                                                                                                                                                                                                                             | Enheter | Prosent                      |
| 0                                                                                                                                             |                                                                                                                                                                                                                                                       | 2364    | <div><div></div></div> 50.4% |
| 1                                                                                                                                             | Artikkel valgt av respondent                                                                                                                                                                                                                          | 2287    | <div><div></div></div> 48.8% |
| 97                                                                                                                                            | Ikke svart                                                                                                                                                                                                                                            | 38      | <div><div></div></div> 0.8%  |
| Advarsel: disse tallene indikerer antall enheter (cases) i datafilen. De kan ikke tolkes som oppsummert statistikk for populasjonen.          |                                                                                                                                                                                                                                                       |         |                              |
| # r7selexp2_3: Artikkel 3. En liste over tilfeldig valgte artikler hvor respondentene skal velge hvilke de vil lese. Konjunksjonseksperiment. |                                                                                                                                                                                                                                                       |         |                              |
| Informasjon                                                                                                                                   | [Type= diskret] [Format=numeric] [Rekkevidde= 1-1] [Missing=*]                                                                                                                                                                                        |         |                              |
| Statistikk [NW/ W]                                                                                                                            | [Gyldige=4689 /-] [Ugyldig=0 /-]                                                                                                                                                                                                                      |         |                              |
| Tekst før spørsmål                                                                                                                            | Vi ønsker å studere hvilke mediasaker folk leser. Under er noen tenkte saker vi har laget som minner om de man kan finne i norske nettaviser. Vennligst les alle overskriftene nøye og se for deg at sakene er ekte.                                  |         |                              |
| Spørsmålstekst                                                                                                                                | Hvis du var nødt til å lese [1 sak /2 saker /3 saker], [hvilken sak /hvilke saker] ville du foretrukket å bruke tiden din på?<br><br>[Her følger en liste over tilfeldig valgte artikler. Se bakgrunnsvariabler.]                                     |         |                              |
| Instruksjoner til intervjueren                                                                                                                | [Alle respondenter spurt. Konjunksjons-eksperiment. Responenten blir eksponert for et sett av tilfeldig valgte artikler. Artiklene har tilfeldig valgte karakteristika. R7PAD14 og R7SELEXP2 blir stilt i tilfeldig rekkefølge. Se R7SELEXP_order. .] |         |                              |
| Kommentarer                                                                                                                                   | ^f('R7SELEXP2_body')[3]^ (Vi ønsker å studere hvilke mediasaker folk leser. Under er noen tenkte saker vi har laget s                                                                                                                                 |         |                              |
| Verdi                                                                                                                                         | Merkelapp                                                                                                                                                                                                                                             | Enheter | Prosent                      |
| 0                                                                                                                                             |                                                                                                                                                                                                                                                       | 2395    | <div><div></div></div> 51.1% |
| 1                                                                                                                                             | Artikkel valgt av respondent                                                                                                                                                                                                                          | 2256    | <div><div></div></div> 48.1% |
| 97                                                                                                                                            | Ikke svart                                                                                                                                                                                                                                            | 38      | <div><div></div></div> 0.8%  |
| Advarsel: disse tallene indikerer antall enheter (cases) i datafilen. De kan ikke tolkes som oppsummert statistikk for populasjonen.          |                                                                                                                                                                                                                                                       |         |                              |

| # r7selexp2_4: Artikkel 4. En liste over tilfeldig valgte artikler hvor respondentene skal velge hvilke de vil lese. Konjunksjonseksperiment. |                                                                                                                                                                                                                                                        |         |                              |
|-----------------------------------------------------------------------------------------------------------------------------------------------|--------------------------------------------------------------------------------------------------------------------------------------------------------------------------------------------------------------------------------------------------------|---------|------------------------------|
| Informasjon                                                                                                                                   | [Type= diskret] [Format=numeric] [Rekkevidde= 1-1] [Missing=*]                                                                                                                                                                                         |         |                              |
| Statistikk [NW/ W]                                                                                                                            | [Gyldige=4689 /-] [Ugyldig=0 /-]                                                                                                                                                                                                                       |         |                              |
| Tekst før spørsmål                                                                                                                            | Vi ønsker å studere hvilke mediasaker folk leser. Under er noen tenkte saker vi har laget som minner om de man kan finne i norske nettaviser. Vennligst les alle overskriftene nøye og se for deg at sakene er ekte.                                   |         |                              |
| Spørsmålstekst                                                                                                                                | Hvis du var nødt til å lese [1 sak /2 saker /3 saker], [hvilken sak /hvilke saker] ville du foretrukket å bruke tiden din på?<br><br>[Her følger en liste over tilfeldig valgte artikler. Se bakgrunnsvariabler.]                                      |         |                              |
| Instruksjoner til intervjueren                                                                                                                | [Alle respondenter spurt. Konjunksjons-eksperiment. Responenten blir eksponert for et sett av tilfeldig valgte artikler. Artikkelen har tilfeldig valgte karakteristika. R7PAD14 og R7SELEXP2 blir stilt i tilfeldig rekkefølge. Se R7SELEXP_order. .] |         |                              |
| Kommentarer                                                                                                                                   | ^f('R7SELEXP2_body')[4]^ (Vi ønsker å studere hvilke mediasaker folk leser. Under er noen tenkte saker vi har laget s                                                                                                                                  |         |                              |
| Verdi                                                                                                                                         | Merkelapp                                                                                                                                                                                                                                              | Enheter | Prosent                      |
| 0                                                                                                                                             |                                                                                                                                                                                                                                                        | 2421    | <div><div></div></div> 51.6% |
| 1                                                                                                                                             | Artikkel valgt av respondent                                                                                                                                                                                                                           | 2230    | <div><div></div></div> 47.6% |
| 97                                                                                                                                            | Ikke svart                                                                                                                                                                                                                                             | 38      | <div><div></div></div> 0.8%  |
| Advarsel: disse tallene indikerer antall enheter (cases) i datafilen. De kan ikke tolkes som oppsummert statistikk for populasjonen.          |                                                                                                                                                                                                                                                        |         |                              |
| # r7Error_selexp: 36 respondenter opplevde feil i kojunksjonseksperimentene r7pad14 og r7selexp2. Disse ble hindret fra å gå videre i skjema. |                                                                                                                                                                                                                                                        |         |                              |
| Informasjon                                                                                                                                   | [Type= diskret] [Format=numeric] [Missing=*]                                                                                                                                                                                                           |         |                              |
| Statistikk [NW/ W]                                                                                                                            | [Gyldige=4689 /-] [Ugyldig=0 /-]                                                                                                                                                                                                                       |         |                              |
| Verdi                                                                                                                                         | Merkelapp                                                                                                                                                                                                                                              | Enheter | Prosent                      |
| 0                                                                                                                                             | Opplevde ikke feil                                                                                                                                                                                                                                     | 4653    | <div><div></div></div> 99.2% |
| 1                                                                                                                                             | Opplevde feil                                                                                                                                                                                                                                          | 36      | <div><div></div></div> 0.8%  |
| Advarsel: disse tallene indikerer antall enheter (cases) i datafilen. De kan ikke tolkes som oppsummert statistikk for populasjonen.          |                                                                                                                                                                                                                                                        |         |                              |
| # r7selexp_order: Viser i hvilken rekkefølge r7pad14 og r7selexp2 blir spurt. Rekkefølgen er tilfeldig.                                       |                                                                                                                                                                                                                                                        |         |                              |
| Informasjon                                                                                                                                   | [Type= diskret] [Format=character] [Missing=*]                                                                                                                                                                                                         |         |                              |
| Statistikk [NW/ W]                                                                                                                            | [Gyldige=4689 /-] [Ugyldig=0 /-]                                                                                                                                                                                                                       |         |                              |
| Instruksjoner til intervjueren                                                                                                                | [Lagrer i hvilken rekkefølge R7PAD14 og R7SELEXP2 er spurt.]                                                                                                                                                                                           |         |                              |
| Verdi                                                                                                                                         | Merkelapp                                                                                                                                                                                                                                              | Enheter | Prosent                      |
|                                                                                                                                               |                                                                                                                                                                                                                                                        | 42      | <div><div></div></div> 0.9%  |
| R7PAD14,R7SEL                                                                                                                                 |                                                                                                                                                                                                                                                        | 2330    | <div><div></div></div> 49.7% |
| R7SELEXP2,R7P                                                                                                                                 |                                                                                                                                                                                                                                                        | 2317    | <div><div></div></div> 49.4% |
| Advarsel: disse tallene indikerer antall enheter (cases) i datafilen. De kan ikke tolkes som oppsummert statistikk for populasjonen.          |                                                                                                                                                                                                                                                        |         |                              |
| # r7pad6_profile1_1: Karakteristikk til profil 1: alder. Bakgrunnsvariabel til r7pad6.                                                        |                                                                                                                                                                                                                                                        |         |                              |
| Informasjon                                                                                                                                   | [Type= diskret] [Format=character] [Missing=*]                                                                                                                                                                                                         |         |                              |
| Statistikk [NW/ W]                                                                                                                            | [Gyldige=4689 /-] [Ugyldig=0 /-]                                                                                                                                                                                                                       |         |                              |
| Instruksjoner til intervjueren                                                                                                                | [Bakgrunnsvariabel. Lagrer tilfeldig valgt alder til profil 1 i konjunksjonseksperimentet R7PAD6.]                                                                                                                                                     |         |                              |
| Verdi                                                                                                                                         | Merkelapp                                                                                                                                                                                                                                              | Enheter | Prosent                      |
|                                                                                                                                               |                                                                                                                                                                                                                                                        | 3597    | <div><div></div></div> 76.7% |
| 22 år                                                                                                                                         |                                                                                                                                                                                                                                                        | 162     | <div><div></div></div> 3.5%  |
| 30 år                                                                                                                                         |                                                                                                                                                                                                                                                        | 153     | <div><div></div></div> 3.3%  |
| 40 år                                                                                                                                         |                                                                                                                                                                                                                                                        | 150     | <div><div></div></div> 3.2%  |

| # r7pad6_profile1_1: Karakteristikk til profil 1: alder. Bakgrunnsvariabel til r7pad6.                                               |                                                                                                         |         |                              |
|--------------------------------------------------------------------------------------------------------------------------------------|---------------------------------------------------------------------------------------------------------|---------|------------------------------|
| Verdi                                                                                                                                | Merkelapp                                                                                               | Enheter | Prosent                      |
| 50 år                                                                                                                                |                                                                                                         | 135     | <div><div></div></div> 2.9%  |
| 60 år                                                                                                                                |                                                                                                         | 169     | <div><div></div></div> 3.6%  |
| 70 år                                                                                                                                |                                                                                                         | 169     | <div><div></div></div> 3.6%  |
| 80 år                                                                                                                                |                                                                                                         | 154     | <div><div></div></div> 3.3%  |
| Advarsel: disse tallene indikerer antall enheter (cases) i datafilen. De kan ikke tolkes som oppsummert statistikk for populasjonen. |                                                                                                         |         |                              |
| # r7pad6_profile1_2: Karakteristikk til profil 1: kjønn. Bakgrunnsvariabel til r7pad6.                                               |                                                                                                         |         |                              |
| Informasjon                                                                                                                          | [Type= diskret] [Format=character] [Missing=*]                                                          |         |                              |
| Statistikk [NW/ W]                                                                                                                   | [Gyldige=4689 /-] [Ugyldig=0 /-]                                                                        |         |                              |
| Instruksjoner til intervjueren                                                                                                       | [Bakgrunnsvariabel. Lagrer tilfeldig valgt kjønn til profil 1 i konjunksjonsekperimentet R7PAD6.]       |         |                              |
| Verdi                                                                                                                                | Merkelapp                                                                                               | Enheter | Prosent                      |
|                                                                                                                                      |                                                                                                         | 3597    | <div><div></div></div> 76.7% |
| Kvinne                                                                                                                               |                                                                                                         | 539     | <div><div></div></div> 11.5% |
| Mann                                                                                                                                 |                                                                                                         | 553     | <div><div></div></div> 11.8% |
| Advarsel: disse tallene indikerer antall enheter (cases) i datafilen. De kan ikke tolkes som oppsummert statistikk for populasjonen. |                                                                                                         |         |                              |
| # r7pad6_profile1_3: Karakteristikk til profil 1: bosted. Bakgrunnsvariabel til r7pad6.                                              |                                                                                                         |         |                              |
| Informasjon                                                                                                                          | [Type= diskret] [Format=character] [Missing=*]                                                          |         |                              |
| Statistikk [NW/ W]                                                                                                                   | [Gyldige=4689 /-] [Ugyldig=0 /-]                                                                        |         |                              |
| Instruksjoner til intervjueren                                                                                                       | [Bakgrunnsvariabel. Lagrer tilfeldig valgt geografi til profil 1 i konjunksjonsekperimentet R7PAD6.]    |         |                              |
| Verdi                                                                                                                                | Merkelapp                                                                                               | Enheter | Prosent                      |
|                                                                                                                                      |                                                                                                         | 3597    | <div><div></div></div> 76.7% |
| Midt-Norge                                                                                                                           |                                                                                                         | 168     | <div><div></div></div> 3.6%  |
| Nord-Norge                                                                                                                           |                                                                                                         | 189     | <div><div></div></div> 4.0%  |
| Oslo                                                                                                                                 |                                                                                                         | 168     | <div><div></div></div> 3.6%  |
| Sørlandet                                                                                                                            |                                                                                                         | 186     | <div><div></div></div> 4.0%  |
| Vestlandet                                                                                                                           |                                                                                                         | 186     | <div><div></div></div> 4.0%  |
| Østlandet                                                                                                                            |                                                                                                         | 195     | <div><div></div></div> 4.2%  |
| Advarsel: disse tallene indikerer antall enheter (cases) i datafilen. De kan ikke tolkes som oppsummert statistikk for populasjonen. |                                                                                                         |         |                              |
| # r7pad6_profile1_4: Karakteristikk til profil 1: sivilstatus. Bakgrunnsvariabel til r7pad6.                                         |                                                                                                         |         |                              |
| Informasjon                                                                                                                          | [Type= diskret] [Format=character] [Missing=*]                                                          |         |                              |
| Statistikk [NW/ W]                                                                                                                   | [Gyldige=4689 /-] [Ugyldig=0 /-]                                                                        |         |                              |
| Instruksjoner til intervjueren                                                                                                       | [Bakgrunnsvariabel. Lagrer tilfeldig valgt sivilstatus til profil 1 i konjunksjonsekperimentet R7PAD6.] |         |                              |
| Verdi                                                                                                                                | Merkelapp                                                                                               | Enheter | Prosent                      |
|                                                                                                                                      |                                                                                                         | 3597    | <div><div></div></div> 76.7% |
| Bor alene                                                                                                                            |                                                                                                         | 358     | <div><div></div></div> 7.6%  |
| Gift                                                                                                                                 |                                                                                                         | 336     | <div><div></div></div> 7.2%  |
| Samboer                                                                                                                              |                                                                                                         | 398     | <div><div></div></div> 8.5%  |
| Advarsel: disse tallene indikerer antall enheter (cases) i datafilen. De kan ikke tolkes som oppsummert statistikk for populasjonen. |                                                                                                         |         |                              |
| # r7pad6_profile1_5: Karakteristikk til profil 1: utdanning. Bakgrunnsvariabel til r7pad6.                                           |                                                                                                         |         |                              |
| Informasjon                                                                                                                          | [Type= diskret] [Format=character] [Missing=*]                                                          |         |                              |
| Statistikk [NW/ W]                                                                                                                   | [Gyldige=4689 /-] [Ugyldig=0 /-]                                                                        |         |                              |

| # r7pad6_profile1_5: Karakteristikk til profil 1: utdanning. Bakgrunnsvariabel til r7pad6.                                           |           |                                                                                                                  |                   |
|--------------------------------------------------------------------------------------------------------------------------------------|-----------|------------------------------------------------------------------------------------------------------------------|-------------------|
| Instruksjoner til intervjueren                                                                                                       |           | [Bakgrunnsvariabel. Lagrer tilfeldig valgt utdanningsnivå til profil 1 i konjunksjonsekperimentet R7PAD6.]       |                   |
| Verdi                                                                                                                                | Merkelapp | Enheter                                                                                                          | Prosent           |
|                                                                                                                                      |           | 3597                                                                                                             | <div></div> 76.7% |
| Doktorgrad                                                                                                                           |           | 279                                                                                                              | <div></div> 6.0%  |
| Grunnskole                                                                                                                           |           | 258                                                                                                              | <div></div> 5.5%  |
| Universitet                                                                                                                          |           | 275                                                                                                              | <div></div> 5.9%  |
| Videregående                                                                                                                         |           | 280                                                                                                              | <div></div> 6.0%  |
| Advarsel: disse tallene indikerer antall enheter (cases) i datafilen. De kan ikke tolkes som oppsummert statistikk for populasjonen. |           |                                                                                                                  |                   |
| # r7pad6_profile1_6: Karakteristikk til profil 1: religion. Bakgrunnsvariabel til r7pad6.                                            |           |                                                                                                                  |                   |
| Informasjon                                                                                                                          |           | [Type= diskret] [Format=character] [Missing=*]                                                                   |                   |
| Statistikk [NW/ W]                                                                                                                   |           | [Gyldige=4689 /-] [Ugyldig=0 /-]                                                                                 |                   |
| Instruksjoner til intervjueren                                                                                                       |           | [Bakgrunnsvariabel. Lagrer tilfeldig valgt religiøs tilhørighet til profil 1 i konjunksjonsekperimentet R7PAD6.] |                   |
| Verdi                                                                                                                                | Merkelapp | Enheter                                                                                                          | Prosent           |
|                                                                                                                                      |           | 3597                                                                                                             | <div></div> 76.7% |
| Ingen                                                                                                                                |           | 349                                                                                                              | <div></div> 7.4%  |
| Islam                                                                                                                                |           | 360                                                                                                              | <div></div> 7.7%  |
| Kristendom                                                                                                                           |           | 383                                                                                                              | <div></div> 8.2%  |
| Advarsel: disse tallene indikerer antall enheter (cases) i datafilen. De kan ikke tolkes som oppsummert statistikk for populasjonen. |           |                                                                                                                  |                   |
| # r7pad6_profile1_7: Karakteristikk til profil 1: arbeidserfaring. Bakgrunnsvariabel til r7pad6.                                     |           |                                                                                                                  |                   |
| Informasjon                                                                                                                          |           | [Type= diskret] [Format=character] [Missing=*]                                                                   |                   |
| Statistikk [NW/ W]                                                                                                                   |           | [Gyldige=4689 /-] [Ugyldig=0 /-]                                                                                 |                   |
| Instruksjoner til intervjueren                                                                                                       |           | [Bakgrunnsvariabel. Lagrer tilfeldig valgt yrke til profil 1 i konjunksjonsekperimentet R7PAD6.]                 |                   |
| Verdi                                                                                                                                | Merkelapp | Enheter                                                                                                          | Prosent           |
|                                                                                                                                      |           | 3597                                                                                                             | <div></div> 76.7% |
| Bonde                                                                                                                                |           | 175                                                                                                              | <div></div> 3.7%  |
| IT-konsulent                                                                                                                         |           | 172                                                                                                              | <div></div> 3.7%  |
| Ingen                                                                                                                                |           | 186                                                                                                              | <div></div> 4.0%  |
| Oljearbeider                                                                                                                         |           | 183                                                                                                              | <div></div> 3.9%  |
| Omsorgsarbeider                                                                                                                      |           | 208                                                                                                              | <div></div> 4.4%  |
| Selvstendig næringsdrivende                                                                                                          |           | 168                                                                                                              | <div></div> 3.6%  |
| Advarsel: disse tallene indikerer antall enheter (cases) i datafilen. De kan ikke tolkes som oppsummert statistikk for populasjonen. |           |                                                                                                                  |                   |
| # r7pad6_profile2_1: Karakteristikk til profil 2: alder. Bakgrunnsvariabel til r7pad6.                                               |           |                                                                                                                  |                   |
| Informasjon                                                                                                                          |           | [Type= diskret] [Format=character] [Missing=*]                                                                   |                   |
| Statistikk [NW/ W]                                                                                                                   |           | [Gyldige=4689 /-] [Ugyldig=0 /-]                                                                                 |                   |
| Instruksjoner til intervjueren                                                                                                       |           | [Bakgrunnsvariabel. Lagrer tilfeldig valgt alder til profil 2 i konjunksjonsekperimentet R7PAD6.]                |                   |
| Verdi                                                                                                                                | Merkelapp | Enheter                                                                                                          | Prosent           |
|                                                                                                                                      |           | 3597                                                                                                             | <div></div> 76.7% |
| 22 år                                                                                                                                |           | 147                                                                                                              | <div></div> 3.1%  |
| 30 år                                                                                                                                |           | 159                                                                                                              | <div></div> 3.4%  |
| 40 år                                                                                                                                |           | 146                                                                                                              | <div></div> 3.1%  |

| # r7pad6_profile2_1: Karakteristikk til profil 2: alder. Bakgrunnsvariabel til r7pad6.                                               |                                                                                                         |         |                              |
|--------------------------------------------------------------------------------------------------------------------------------------|---------------------------------------------------------------------------------------------------------|---------|------------------------------|
| Verdi                                                                                                                                | Merkelapp                                                                                               | Enheter | Prosent                      |
| 50 år                                                                                                                                |                                                                                                         | 165     | <div><div></div></div> 3.5%  |
| 60 år                                                                                                                                |                                                                                                         | 166     | <div><div></div></div> 3.5%  |
| 70 år                                                                                                                                |                                                                                                         | 155     | <div><div></div></div> 3.3%  |
| 80 år                                                                                                                                |                                                                                                         | 154     | <div><div></div></div> 3.3%  |
| Advarsel: disse tallene indikerer antall enheter (cases) i datafilen. De kan ikke tolkes som oppsummert statistikk for populasjonen. |                                                                                                         |         |                              |
| # r7pad6_profile2_2: Karakteristikk til profil 2: kjønn. Bakgrunnsvariabel til r7pad6.                                               |                                                                                                         |         |                              |
| Informasjon                                                                                                                          | [Type= diskret] [Format=character] [Missing=*]                                                          |         |                              |
| Statistikk [NW/ W]                                                                                                                   | [Gyldige=4689 /-] [Ugyldig=0 /-]                                                                        |         |                              |
| Instruksjoner til intervjueren                                                                                                       | [Bakgrunnsvariabel. Lagrer tilfeldig valgt kjønn til profil 2 i konjunksjonsekperimentet R7PAD6.]       |         |                              |
| Verdi                                                                                                                                | Merkelapp                                                                                               | Enheter | Prosent                      |
|                                                                                                                                      |                                                                                                         | 3597    | <div><div></div></div> 76.7% |
| Kvinne                                                                                                                               |                                                                                                         | 549     | <div><div></div></div> 11.7% |
| Mann                                                                                                                                 |                                                                                                         | 543     | <div><div></div></div> 11.6% |
| Advarsel: disse tallene indikerer antall enheter (cases) i datafilen. De kan ikke tolkes som oppsummert statistikk for populasjonen. |                                                                                                         |         |                              |
| # r7pad6_profile2_3: Karakteristikk til profil 2: bosted. Bakgrunnsvariabel til r7pad6.                                              |                                                                                                         |         |                              |
| Informasjon                                                                                                                          | [Type= diskret] [Format=character] [Missing=*]                                                          |         |                              |
| Statistikk [NW/ W]                                                                                                                   | [Gyldige=4689 /-] [Ugyldig=0 /-]                                                                        |         |                              |
| Instruksjoner til intervjueren                                                                                                       | [Bakgrunnsvariabel. Lagrer tilfeldig valgt geografi til profil 2 i konjunksjonsekperimentet R7PAD6.]    |         |                              |
| Verdi                                                                                                                                | Merkelapp                                                                                               | Enheter | Prosent                      |
|                                                                                                                                      |                                                                                                         | 3597    | <div><div></div></div> 76.7% |
| Midt-Norge                                                                                                                           |                                                                                                         | 190     | <div><div></div></div> 4.1%  |
| Nord-Norge                                                                                                                           |                                                                                                         | 183     | <div><div></div></div> 3.9%  |
| Oslo                                                                                                                                 |                                                                                                         | 187     | <div><div></div></div> 4.0%  |
| Sørlandet                                                                                                                            |                                                                                                         | 180     | <div><div></div></div> 3.8%  |
| Vestlandet                                                                                                                           |                                                                                                         | 171     | <div><div></div></div> 3.6%  |
| Østlandet                                                                                                                            |                                                                                                         | 181     | <div><div></div></div> 3.9%  |
| Advarsel: disse tallene indikerer antall enheter (cases) i datafilen. De kan ikke tolkes som oppsummert statistikk for populasjonen. |                                                                                                         |         |                              |
| # r7pad6_profile2_4: Karakteristikk til profil 2: sivilstatus. Bakgrunnsvariabel til r7pad6.                                         |                                                                                                         |         |                              |
| Informasjon                                                                                                                          | [Type= diskret] [Format=character] [Missing=*]                                                          |         |                              |
| Statistikk [NW/ W]                                                                                                                   | [Gyldige=4689 /-] [Ugyldig=0 /-]                                                                        |         |                              |
| Instruksjoner til intervjueren                                                                                                       | [Bakgrunnsvariabel. Lagrer tilfeldig valgt sivilstatus til profil 2 i konjunksjonsekperimentet R7PAD6.] |         |                              |
| Verdi                                                                                                                                | Merkelapp                                                                                               | Enheter | Prosent                      |
|                                                                                                                                      |                                                                                                         | 3597    | <div><div></div></div> 76.7% |
| Bor alene                                                                                                                            |                                                                                                         | 380     | <div><div></div></div> 8.1%  |
| Gift                                                                                                                                 |                                                                                                         | 375     | <div><div></div></div> 8.0%  |
| Samboer                                                                                                                              |                                                                                                         | 337     | <div><div></div></div> 7.2%  |
| Advarsel: disse tallene indikerer antall enheter (cases) i datafilen. De kan ikke tolkes som oppsummert statistikk for populasjonen. |                                                                                                         |         |                              |
| # r7pad6_profile2_5: Karakteristikk til profil 2: utdanning. Bakgrunnsvariabel til r7pad6.                                           |                                                                                                         |         |                              |
| Informasjon                                                                                                                          | [Type= diskret] [Format=character] [Missing=*]                                                          |         |                              |
| Statistikk [NW/ W]                                                                                                                   | [Gyldige=4689 /-] [Ugyldig=0 /-]                                                                        |         |                              |



| # r7pad6_profile2_5: Karakteristikk til profil 2: utdanning. Bakgrunnsvariabel til r7pad6.                                           |           |                                                                                                                   |                   |
|--------------------------------------------------------------------------------------------------------------------------------------|-----------|-------------------------------------------------------------------------------------------------------------------|-------------------|
| Instruksjoner til intervjueren                                                                                                       |           | [Bakgrunnsvariabel. Lagrer tilfeldig valgt utdanningsnivå til profil 2 i konjunksjonseksperimentet R7PAD6.]       |                   |
| Verdi                                                                                                                                | Merkelapp | Enheter                                                                                                           | Prosent           |
|                                                                                                                                      |           | 3597                                                                                                              | <div></div> 76.7% |
| Doktorgrad                                                                                                                           |           | 270                                                                                                               | <div></div> 5.8%  |
| Grunnskole                                                                                                                           |           | 276                                                                                                               | <div></div> 5.9%  |
| Universitet                                                                                                                          |           | 263                                                                                                               | <div></div> 5.6%  |
| Videregående                                                                                                                         |           | 283                                                                                                               | <div></div> 6.0%  |
| Advarsel: disse tallene indikerer antall enheter (cases) i datafilen. De kan ikke tolkes som oppsummert statistikk for populasjonen. |           |                                                                                                                   |                   |
| # r7pad6_profile2_6: Karakteristikk til profil 2: religion. Bakgrunnsvariabel til r7pad6.                                            |           |                                                                                                                   |                   |
| Informasjon                                                                                                                          |           | [Type= diskret] [Format=character] [Missing=*]                                                                    |                   |
| Statistikk [NW/ W]                                                                                                                   |           | [Gyldige=4689 /-] [Ugyldig=0 /-]                                                                                  |                   |
| Instruksjoner til intervjueren                                                                                                       |           | [Bakgrunnsvariabel. Lagrer tilfeldig valgt religiøs tilhørighet til profil 2 i konjunksjonseksperimentet R7PAD6.] |                   |
| Verdi                                                                                                                                | Merkelapp | Enheter                                                                                                           | Prosent           |
|                                                                                                                                      |           | 3597                                                                                                              | <div></div> 76.7% |
| Ingen                                                                                                                                |           | 345                                                                                                               | <div></div> 7.4%  |
| Islam                                                                                                                                |           | 380                                                                                                               | <div></div> 8.1%  |
| Kristendom                                                                                                                           |           | 367                                                                                                               | <div></div> 7.8%  |
| Advarsel: disse tallene indikerer antall enheter (cases) i datafilen. De kan ikke tolkes som oppsummert statistikk for populasjonen. |           |                                                                                                                   |                   |
| # r7pad6_profile2_7: Karakteristikk til profil 2: arbeidserfaring. Bakgrunnsvariabel til r7pad6.                                     |           |                                                                                                                   |                   |
| Informasjon                                                                                                                          |           | [Type= diskret] [Format=character] [Missing=*]                                                                    |                   |
| Statistikk [NW/ W]                                                                                                                   |           | [Gyldige=4689 /-] [Ugyldig=0 /-]                                                                                  |                   |
| Instruksjoner til intervjueren                                                                                                       |           | [Bakgrunnsvariabel. Lagrer tilfeldig valgt yrke til profil 2 i konjunksjonseksperimentet R7PAD6.]                 |                   |
| Verdi                                                                                                                                | Merkelapp | Enheter                                                                                                           | Prosent           |
|                                                                                                                                      |           | 3597                                                                                                              | <div></div> 76.7% |
| Bonde                                                                                                                                |           | 184                                                                                                               | <div></div> 3.9%  |
| IT-konsulent                                                                                                                         |           | 191                                                                                                               | <div></div> 4.1%  |
| Ingen                                                                                                                                |           | 165                                                                                                               | <div></div> 3.5%  |
| Oljearbeider                                                                                                                         |           | 175                                                                                                               | <div></div> 3.7%  |
| Omsorgsarbeider                                                                                                                      |           | 194                                                                                                               | <div></div> 4.1%  |
| Selvstendig næringsdrivende                                                                                                          |           | 183                                                                                                               | <div></div> 3.9%  |
| Advarsel: disse tallene indikerer antall enheter (cases) i datafilen. De kan ikke tolkes som oppsummert statistikk for populasjonen. |           |                                                                                                                   |                   |

| # r7pad7_profile1_1: Karakteristikk til profil 1: alder. Bakgrunnsvariabel til r7pad7.                                               |                                                                                                         |         |                              |
|--------------------------------------------------------------------------------------------------------------------------------------|---------------------------------------------------------------------------------------------------------|---------|------------------------------|
| Informasjon                                                                                                                          | [Type= diskret] [Format=character] [Missing=*]                                                          |         |                              |
| Statistikk [NW/ W]                                                                                                                   | [Gyldige=4689 /-] [Ugyldig=0 /-]                                                                        |         |                              |
| Instruksjoner til intervjueren                                                                                                       | [Bakgrunnsvariabel. Lagrer tilfeldig valgt alder til profil 1 i konjunksjonsekperimentet R7PAD7.]       |         |                              |
| Verdi                                                                                                                                | Merkelapp                                                                                               | Enheter | Prosent                      |
|                                                                                                                                      |                                                                                                         | 3597    | <div><div></div></div> 76.7% |
| 22 år                                                                                                                                |                                                                                                         | 149     | <div><div></div></div> 3.2%  |
| 30 år                                                                                                                                |                                                                                                         | 159     | <div><div></div></div> 3.4%  |
| 40 år                                                                                                                                |                                                                                                         | 147     | <div><div></div></div> 3.1%  |
| 50 år                                                                                                                                |                                                                                                         | 188     | <div><div></div></div> 4.0%  |
| 60 år                                                                                                                                |                                                                                                         | 165     | <div><div></div></div> 3.5%  |
| 70 år                                                                                                                                |                                                                                                         | 130     | <div><div></div></div> 2.8%  |
| 80 år                                                                                                                                |                                                                                                         | 154     | <div><div></div></div> 3.3%  |
| Advarsel: disse tallene indikerer antall enheter (cases) i datafilen. De kan ikke tolkes som oppsummert statistikk for populasjonen. |                                                                                                         |         |                              |
| # r7pad7_profile1_2: Karakteristikk til profil 1: kjønn. Bakgrunnsvariabel til r7pad7.                                               |                                                                                                         |         |                              |
| Informasjon                                                                                                                          | [Type= diskret] [Format=character] [Missing=*]                                                          |         |                              |
| Statistikk [NW/ W]                                                                                                                   | [Gyldige=4689 /-] [Ugyldig=0 /-]                                                                        |         |                              |
| Instruksjoner til intervjueren                                                                                                       | [Bakgrunnsvariabel. Lagrer tilfeldig valgt kjønn til profil 1 i konjunksjonsekperimentet R7PAD7.]       |         |                              |
| Verdi                                                                                                                                | Merkelapp                                                                                               | Enheter | Prosent                      |
|                                                                                                                                      |                                                                                                         | 3597    | <div><div></div></div> 76.7% |
| Kvinne                                                                                                                               |                                                                                                         | 528     | <div><div></div></div> 11.3% |
| Mann                                                                                                                                 |                                                                                                         | 564     | <div><div></div></div> 12.0% |
| Advarsel: disse tallene indikerer antall enheter (cases) i datafilen. De kan ikke tolkes som oppsummert statistikk for populasjonen. |                                                                                                         |         |                              |
| # r7pad7_profile1_3: Karakteristikk til profil 1: bosted. Bakgrunnsvariabel til r7pad7.                                              |                                                                                                         |         |                              |
| Informasjon                                                                                                                          | [Type= diskret] [Format=character] [Missing=*]                                                          |         |                              |
| Statistikk [NW/ W]                                                                                                                   | [Gyldige=4689 /-] [Ugyldig=0 /-]                                                                        |         |                              |
| Instruksjoner til intervjueren                                                                                                       | [Bakgrunnsvariabel. Lagrer tilfeldig valgt geografi til profil 1 i konjunksjonsekperimentet R7PAD7.]    |         |                              |
| Verdi                                                                                                                                | Merkelapp                                                                                               | Enheter | Prosent                      |
|                                                                                                                                      |                                                                                                         | 3597    | <div><div></div></div> 76.7% |
| Midt-Norge                                                                                                                           |                                                                                                         | 161     | <div><div></div></div> 3.4%  |
| Nord-Norge                                                                                                                           |                                                                                                         | 196     | <div><div></div></div> 4.2%  |
| Oslo                                                                                                                                 |                                                                                                         | 195     | <div><div></div></div> 4.2%  |
| Sørlandet                                                                                                                            |                                                                                                         | 174     | <div><div></div></div> 3.7%  |
| Vestlandet                                                                                                                           |                                                                                                         | 178     | <div><div></div></div> 3.8%  |
| Østlandet                                                                                                                            |                                                                                                         | 188     | <div><div></div></div> 4.0%  |
| Advarsel: disse tallene indikerer antall enheter (cases) i datafilen. De kan ikke tolkes som oppsummert statistikk for populasjonen. |                                                                                                         |         |                              |
| # r7pad7_profile1_4: Karakteristikk til profil 1: sivilstatus. Bakgrunnsvariabel til r7pad7.                                         |                                                                                                         |         |                              |
| Informasjon                                                                                                                          | [Type= diskret] [Format=character] [Missing=*]                                                          |         |                              |
| Statistikk [NW/ W]                                                                                                                   | [Gyldige=4689 /-] [Ugyldig=0 /-]                                                                        |         |                              |
| Instruksjoner til intervjueren                                                                                                       | [Bakgrunnsvariabel. Lagrer tilfeldig valgt sivilstatus til profil 1 i konjunksjonsekperimentet R7PAD7.] |         |                              |

| # r7pad7_profile1_4: Karakteristikk til profil 1: sivilstatus. Bakgrunnsvariabel til r7pad7.                                         |                                                                                                                  |         |                              |
|--------------------------------------------------------------------------------------------------------------------------------------|------------------------------------------------------------------------------------------------------------------|---------|------------------------------|
| Verdi                                                                                                                                | Merkelapp                                                                                                        | Enheter | Prosent                      |
|                                                                                                                                      |                                                                                                                  | 3597    | <div><div></div></div> 76.7% |
| Bor alene                                                                                                                            |                                                                                                                  | 368     | <div><div></div></div> 7.8%  |
| Gift                                                                                                                                 |                                                                                                                  | 380     | <div><div></div></div> 8.1%  |
| Samboer                                                                                                                              |                                                                                                                  | 344     | <div><div></div></div> 7.3%  |
| Advarsel: disse tallene indikerer antall enheter (cases) i datafilen. De kan ikke tolkes som oppsummert statistikk for populasjonen. |                                                                                                                  |         |                              |
| # r7pad7_profile1_5: Karakteristikk til profil 1: utdanning. Bakgrunnsvariabel til r7pad7.                                           |                                                                                                                  |         |                              |
| Informasjon                                                                                                                          | [Type= diskret] [Format=character] [Missing=*]                                                                   |         |                              |
| Statistikk [NW/ W]                                                                                                                   | [Gyldige=4689 /-] [Ugyldig=0 /-]                                                                                 |         |                              |
| Instruksjoner til intervjueren                                                                                                       | [Bakgrunnsvariabel. Lagrer tilfeldig valgt utdanningsnivå til profil 1 i konjunksjonsekperimentet R7PAD7.]       |         |                              |
| Verdi                                                                                                                                | Merkelapp                                                                                                        | Enheter | Prosent                      |
|                                                                                                                                      |                                                                                                                  | 3597    | <div><div></div></div> 76.7% |
| Doktorgrad                                                                                                                           |                                                                                                                  | 262     | <div><div></div></div> 5.6%  |
| Grunnskole                                                                                                                           |                                                                                                                  | 256     | <div><div></div></div> 5.5%  |
| Universitet                                                                                                                          |                                                                                                                  | 281     | <div><div></div></div> 6.0%  |
| Videregående                                                                                                                         |                                                                                                                  | 293     | <div><div></div></div> 6.2%  |
| Advarsel: disse tallene indikerer antall enheter (cases) i datafilen. De kan ikke tolkes som oppsummert statistikk for populasjonen. |                                                                                                                  |         |                              |
| # r7pad7_profile1_6: Karakteristikk til profil 1: religion. Bakgrunnsvariabel til r7pad7.                                            |                                                                                                                  |         |                              |
| Informasjon                                                                                                                          | [Type= diskret] [Format=character] [Missing=*]                                                                   |         |                              |
| Statistikk [NW/ W]                                                                                                                   | [Gyldige=4689 /-] [Ugyldig=0 /-]                                                                                 |         |                              |
| Instruksjoner til intervjueren                                                                                                       | [Bakgrunnsvariabel. Lagrer tilfeldig valgt religiøs tilhørighet til profil 1 i konjunksjonsekperimentet R7PAD7.] |         |                              |
| Verdi                                                                                                                                | Merkelapp                                                                                                        | Enheter | Prosent                      |
|                                                                                                                                      |                                                                                                                  | 3597    | <div><div></div></div> 76.7% |
| Ingen                                                                                                                                |                                                                                                                  | 368     | <div><div></div></div> 7.8%  |
| Islam                                                                                                                                |                                                                                                                  | 376     | <div><div></div></div> 8.0%  |
| Kristendom                                                                                                                           |                                                                                                                  | 348     | <div><div></div></div> 7.4%  |
| Advarsel: disse tallene indikerer antall enheter (cases) i datafilen. De kan ikke tolkes som oppsummert statistikk for populasjonen. |                                                                                                                  |         |                              |
| # r7pad7_profile1_7: Karakteristikk til profil 1: arbeidserfaring. Bakgrunnsvariabel til r7pad7.                                     |                                                                                                                  |         |                              |
| Informasjon                                                                                                                          | [Type= diskret] [Format=character] [Missing=*]                                                                   |         |                              |
| Statistikk [NW/ W]                                                                                                                   | [Gyldige=4689 /-] [Ugyldig=0 /-]                                                                                 |         |                              |
| Instruksjoner til intervjueren                                                                                                       | [Bakgrunnsvariabel. Lagrer tilfeldig valgt yrke til profil 1 i konjunksjonsekperimentet R7PAD7.]                 |         |                              |
| Verdi                                                                                                                                | Merkelapp                                                                                                        | Enheter | Prosent                      |
|                                                                                                                                      |                                                                                                                  | 3597    | <div><div></div></div> 76.7% |
| Bonde                                                                                                                                |                                                                                                                  | 189     | <div><div></div></div> 4.0%  |
| IT-konsulent                                                                                                                         |                                                                                                                  | 171     | <div><div></div></div> 3.6%  |
| Ingen                                                                                                                                |                                                                                                                  | 166     | <div><div></div></div> 3.5%  |
| Oljearbeider                                                                                                                         |                                                                                                                  | 176     | <div><div></div></div> 3.8%  |
| Omsorgsarbeider                                                                                                                      |                                                                                                                  | 183     | <div><div></div></div> 3.9%  |
| Selvstendig næringsdrivende                                                                                                          |                                                                                                                  | 207     | <div><div></div></div> 4.4%  |
| Advarsel: disse tallene indikerer antall enheter (cases) i datafilen. De kan ikke tolkes som oppsummert statistikk for populasjonen. |                                                                                                                  |         |                              |

| # r7pad7_profile2_1: Karakteristikk til profil 2: alder. Bakgrunnsvariabel til r7pad7.                                               |                                                                                                         |         |                   |
|--------------------------------------------------------------------------------------------------------------------------------------|---------------------------------------------------------------------------------------------------------|---------|-------------------|
| Informasjon                                                                                                                          | [Type= diskret] [Format=character] [Missing=*]                                                          |         |                   |
| Statistikk [NW/ W]                                                                                                                   | [Gyldige=4689 /-] [Ugyldig=0 /-]                                                                        |         |                   |
| Instruksjoner til intervjueren                                                                                                       | [Bakgrunnsvariabel. Lagrer tilfeldig valgt alder til profil 2 i konjunksjonsekperimentet R7PAD7.]       |         |                   |
| Verdi                                                                                                                                | Merkelapp                                                                                               | Enheter | Prosent           |
|                                                                                                                                      |                                                                                                         | 3597    | <div></div> 76.7% |
| 22 år                                                                                                                                |                                                                                                         | 164     | <div></div> 3.5%  |
| 30 år                                                                                                                                |                                                                                                         | 153     | <div></div> 3.3%  |
| 40 år                                                                                                                                |                                                                                                         | 166     | <div></div> 3.5%  |
| 50 år                                                                                                                                |                                                                                                         | 141     | <div></div> 3.0%  |
| 60 år                                                                                                                                |                                                                                                         | 149     | <div></div> 3.2%  |
| 70 år                                                                                                                                |                                                                                                         | 157     | <div></div> 3.3%  |
| 80 år                                                                                                                                |                                                                                                         | 162     | <div></div> 3.5%  |
| Advarsel: disse tallene indikerer antall enheter (cases) i datafilen. De kan ikke tolkes som oppsummert statistikk for populasjonen. |                                                                                                         |         |                   |
| # r7pad7_profile2_2: Karakteristikk til profil 2: kjønn. Bakgrunnsvariabel til r7pad7.                                               |                                                                                                         |         |                   |
| Informasjon                                                                                                                          | [Type= diskret] [Format=character] [Missing=*]                                                          |         |                   |
| Statistikk [NW/ W]                                                                                                                   | [Gyldige=4689 /-] [Ugyldig=0 /-]                                                                        |         |                   |
| Instruksjoner til intervjueren                                                                                                       | [Bakgrunnsvariabel. Lagrer tilfeldig valgt kjønn til profil 2 i konjunksjonsekperimentet R7PAD7.]       |         |                   |
| Verdi                                                                                                                                | Merkelapp                                                                                               | Enheter | Prosent           |
|                                                                                                                                      |                                                                                                         | 3597    | <div></div> 76.7% |
| Kvinne                                                                                                                               |                                                                                                         | 553     | <div></div> 11.8% |
| Mann                                                                                                                                 |                                                                                                         | 539     | <div></div> 11.5% |
| Advarsel: disse tallene indikerer antall enheter (cases) i datafilen. De kan ikke tolkes som oppsummert statistikk for populasjonen. |                                                                                                         |         |                   |
| # r7pad7_profile2_3: Karakteristikk til profil 2: bosted. Bakgrunnsvariabel til r7pad7.                                              |                                                                                                         |         |                   |
| Informasjon                                                                                                                          | [Type= diskret] [Format=character] [Missing=*]                                                          |         |                   |
| Statistikk [NW/ W]                                                                                                                   | [Gyldige=4689 /-] [Ugyldig=0 /-]                                                                        |         |                   |
| Instruksjoner til intervjueren                                                                                                       | [Bakgrunnsvariabel. Lagrer tilfeldig valgt geografi til profil 2 i konjunksjonsekperimentet R7PAD7.]    |         |                   |
| Verdi                                                                                                                                | Merkelapp                                                                                               | Enheter | Prosent           |
|                                                                                                                                      |                                                                                                         | 3597    | <div></div> 76.7% |
| Midt-Norge                                                                                                                           |                                                                                                         | 182     | <div></div> 3.9%  |
| Nord-Norge                                                                                                                           |                                                                                                         | 207     | <div></div> 4.4%  |
| Oslo                                                                                                                                 |                                                                                                         | 174     | <div></div> 3.7%  |
| Sørlandet                                                                                                                            |                                                                                                         | 177     | <div></div> 3.8%  |
| Vestlandet                                                                                                                           |                                                                                                         | 163     | <div></div> 3.5%  |
| Østlandet                                                                                                                            |                                                                                                         | 189     | <div></div> 4.0%  |
| Advarsel: disse tallene indikerer antall enheter (cases) i datafilen. De kan ikke tolkes som oppsummert statistikk for populasjonen. |                                                                                                         |         |                   |
| # r7pad7_profile2_4: Karakteristikk til profil 2: sivilstatus. Bakgrunnsvariabel til r7pad7.                                         |                                                                                                         |         |                   |
| Informasjon                                                                                                                          | [Type= diskret] [Format=character] [Missing=*]                                                          |         |                   |
| Statistikk [NW/ W]                                                                                                                   | [Gyldige=4689 /-] [Ugyldig=0 /-]                                                                        |         |                   |
| Instruksjoner til intervjueren                                                                                                       | [Bakgrunnsvariabel. Lagrer tilfeldig valgt sivilstatus til profil 2 i konjunksjonsekperimentet R7PAD7.] |         |                   |

| # r7pad7_profile2_4: Karakteristikk til profil 2: sivilstatus. Bakgrunnsvariabel til r7pad7.                                         |                                                                                                                  |         |                              |
|--------------------------------------------------------------------------------------------------------------------------------------|------------------------------------------------------------------------------------------------------------------|---------|------------------------------|
| Verdi                                                                                                                                | Merkelapp                                                                                                        | Enheter | Prosent                      |
|                                                                                                                                      |                                                                                                                  | 3597    | <div><div></div></div> 76.7% |
| Bor alene                                                                                                                            |                                                                                                                  | 361     | <div><div></div></div> 7.7%  |
| Gift                                                                                                                                 |                                                                                                                  | 364     | <div><div></div></div> 7.8%  |
| Samboer                                                                                                                              |                                                                                                                  | 367     | <div><div></div></div> 7.8%  |
| Advarsel: disse tallene indikerer antall enheter (cases) i datafilen. De kan ikke tolkes som oppsummert statistikk for populasjonen. |                                                                                                                  |         |                              |
| # r7pad7_profile2_5: Karakteristikk til profil 2: utdanning. Bakgrunnsvariabel til r7pad7.                                           |                                                                                                                  |         |                              |
| Informasjon                                                                                                                          | [Type= diskret] [Format=character] [Missing=*]                                                                   |         |                              |
| Statistikk [NW/ W]                                                                                                                   | [Gyldige=4689 /-] [Ugyldig=0 /-]                                                                                 |         |                              |
| Instruksjoner til intervjueren                                                                                                       | [Bakgrunnsvariabel. Lagrer tilfeldig valgt utdanningsnivå til profil 2 i konjunksjonsekperimentet R7PAD7.]       |         |                              |
| Verdi                                                                                                                                | Merkelapp                                                                                                        | Enheter | Prosent                      |
|                                                                                                                                      |                                                                                                                  | 3597    | <div><div></div></div> 76.7% |
| Doktorgrad                                                                                                                           |                                                                                                                  | 227     | <div><div></div></div> 4.8%  |
| Grunnskole                                                                                                                           |                                                                                                                  | 274     | <div><div></div></div> 5.8%  |
| Universitet                                                                                                                          |                                                                                                                  | 301     | <div><div></div></div> 6.4%  |
| Videregående                                                                                                                         |                                                                                                                  | 290     | <div><div></div></div> 6.2%  |
| Advarsel: disse tallene indikerer antall enheter (cases) i datafilen. De kan ikke tolkes som oppsummert statistikk for populasjonen. |                                                                                                                  |         |                              |
| # r7pad7_profile2_6: Karakteristikk til profil 2: religion. Bakgrunnsvariabel til r7pad7.                                            |                                                                                                                  |         |                              |
| Informasjon                                                                                                                          | [Type= diskret] [Format=character] [Missing=*]                                                                   |         |                              |
| Statistikk [NW/ W]                                                                                                                   | [Gyldige=4689 /-] [Ugyldig=0 /-]                                                                                 |         |                              |
| Instruksjoner til intervjueren                                                                                                       | [Bakgrunnsvariabel. Lagrer tilfeldig valgt religiøs tilhørighet til profil 2 i konjunksjonsekperimentet R7PAD7.] |         |                              |
| Verdi                                                                                                                                | Merkelapp                                                                                                        | Enheter | Prosent                      |
|                                                                                                                                      |                                                                                                                  | 3597    | <div><div></div></div> 76.7% |
| Ingen                                                                                                                                |                                                                                                                  | 358     | <div><div></div></div> 7.6%  |
| Islam                                                                                                                                |                                                                                                                  | 357     | <div><div></div></div> 7.6%  |
| Kristendom                                                                                                                           |                                                                                                                  | 377     | <div><div></div></div> 8.0%  |
| Advarsel: disse tallene indikerer antall enheter (cases) i datafilen. De kan ikke tolkes som oppsummert statistikk for populasjonen. |                                                                                                                  |         |                              |
| # r7pad7_profile2_7: Karakteristikk til profil 2: arbeidserfaring. Bakgrunnsvariabel til r7pad7.                                     |                                                                                                                  |         |                              |
| Informasjon                                                                                                                          | [Type= diskret] [Format=character] [Missing=*]                                                                   |         |                              |
| Statistikk [NW/ W]                                                                                                                   | [Gyldige=4689 /-] [Ugyldig=0 /-]                                                                                 |         |                              |
| Instruksjoner til intervjueren                                                                                                       | [Bakgrunnsvariabel. Lagrer tilfeldig valgt yrke til profil 2 i konjunksjonsekperimentet R7PAD7.]                 |         |                              |
| Verdi                                                                                                                                | Merkelapp                                                                                                        | Enheter | Prosent                      |
|                                                                                                                                      |                                                                                                                  | 3597    | <div><div></div></div> 76.7% |
| Bonde                                                                                                                                |                                                                                                                  | 163     | <div><div></div></div> 3.5%  |
| IT-konsulent                                                                                                                         |                                                                                                                  | 188     | <div><div></div></div> 4.0%  |
| Ingen                                                                                                                                |                                                                                                                  | 158     | <div><div></div></div> 3.4%  |
| Oljearbeider                                                                                                                         |                                                                                                                  | 207     | <div><div></div></div> 4.4%  |
| Omsorgsarbeider                                                                                                                      |                                                                                                                  | 179     | <div><div></div></div> 3.8%  |
| Selvstendig næringsdrivende                                                                                                          |                                                                                                                  | 197     | <div><div></div></div> 4.2%  |
| Advarsel: disse tallene indikerer antall enheter (cases) i datafilen. De kan ikke tolkes som oppsummert statistikk for populasjonen. |                                                                                                                  |         |                              |

| # r7pad8_profile1_1: Karakteristikk til profil 1: alder. Bakgrunnsvariabel til r7pad8.                                               |                                                                                                         |         |                   |
|--------------------------------------------------------------------------------------------------------------------------------------|---------------------------------------------------------------------------------------------------------|---------|-------------------|
| Informasjon                                                                                                                          | [Type= diskret] [Format=character] [Missing=*]                                                          |         |                   |
| Statistikk [NW/ W]                                                                                                                   | [Gyldige=4689 /-] [Ugyldig=0 /-]                                                                        |         |                   |
| Instruksjoner til intervjueren                                                                                                       | [Bakgrunnsvariabel. Lagrer tilfeldig valgt alder til profil 1 i konjunksjonsekperimentet R7PAD8.]       |         |                   |
| Verdi                                                                                                                                | Merkelapp                                                                                               | Enheter | Prosent           |
|                                                                                                                                      |                                                                                                         | 3597    | <div></div> 76.7% |
| 22 år                                                                                                                                |                                                                                                         | 141     | <div></div> 3.0%  |
| 30 år                                                                                                                                |                                                                                                         | 176     | <div></div> 3.8%  |
| 40 år                                                                                                                                |                                                                                                         | 133     | <div></div> 2.8%  |
| 50 år                                                                                                                                |                                                                                                         | 146     | <div></div> 3.1%  |
| 60 år                                                                                                                                |                                                                                                         | 162     | <div></div> 3.5%  |
| 70 år                                                                                                                                |                                                                                                         | 177     | <div></div> 3.8%  |
| 80 år                                                                                                                                |                                                                                                         | 157     | <div></div> 3.3%  |
| Advarsel: disse tallene indikerer antall enheter (cases) i datafilen. De kan ikke tolkes som oppsummert statistikk for populasjonen. |                                                                                                         |         |                   |
| # r7pad8_profile1_2: Karakteristikk til profil 1: kjønn. Bakgrunnsvariabel til r7pad8.                                               |                                                                                                         |         |                   |
| Informasjon                                                                                                                          | [Type= diskret] [Format=character] [Missing=*]                                                          |         |                   |
| Statistikk [NW/ W]                                                                                                                   | [Gyldige=4689 /-] [Ugyldig=0 /-]                                                                        |         |                   |
| Instruksjoner til intervjueren                                                                                                       | [Bakgrunnsvariabel. Lagrer tilfeldig valgt kjønn til profil 1 i konjunksjonsekperimentet R7PAD8.]       |         |                   |
| Verdi                                                                                                                                | Merkelapp                                                                                               | Enheter | Prosent           |
|                                                                                                                                      |                                                                                                         | 3597    | <div></div> 76.7% |
| Kvinne                                                                                                                               |                                                                                                         | 564     | <div></div> 12.0% |
| Mann                                                                                                                                 |                                                                                                         | 528     | <div></div> 11.3% |
| Advarsel: disse tallene indikerer antall enheter (cases) i datafilen. De kan ikke tolkes som oppsummert statistikk for populasjonen. |                                                                                                         |         |                   |
| # r7pad8_profile1_3: Karakteristikk til profil 1: bosted. Bakgrunnsvariabel til r7pad8.                                              |                                                                                                         |         |                   |
| Informasjon                                                                                                                          | [Type= diskret] [Format=character] [Missing=*]                                                          |         |                   |
| Statistikk [NW/ W]                                                                                                                   | [Gyldige=4689 /-] [Ugyldig=0 /-]                                                                        |         |                   |
| Instruksjoner til intervjueren                                                                                                       | [Bakgrunnsvariabel. Lagrer tilfeldig valgt geografi til profil 1 i konjunksjonsekperimentet R7PAD8.]    |         |                   |
| Verdi                                                                                                                                | Merkelapp                                                                                               | Enheter | Prosent           |
|                                                                                                                                      |                                                                                                         | 3597    | <div></div> 76.7% |
| Midt-Norge                                                                                                                           |                                                                                                         | 199     | <div></div> 4.2%  |
| Nord-Norge                                                                                                                           |                                                                                                         | 189     | <div></div> 4.0%  |
| Oslo                                                                                                                                 |                                                                                                         | 165     | <div></div> 3.5%  |
| Sørlandet                                                                                                                            |                                                                                                         | 193     | <div></div> 4.1%  |
| Vestlandet                                                                                                                           |                                                                                                         | 164     | <div></div> 3.5%  |
| Østlandet                                                                                                                            |                                                                                                         | 182     | <div></div> 3.9%  |
| Advarsel: disse tallene indikerer antall enheter (cases) i datafilen. De kan ikke tolkes som oppsummert statistikk for populasjonen. |                                                                                                         |         |                   |
| # r7pad8_profile1_4: Karakteristikk til profil 1: sivilstatus. Bakgrunnsvariabel til r7pad8.                                         |                                                                                                         |         |                   |
| Informasjon                                                                                                                          | [Type= diskret] [Format=character] [Missing=*]                                                          |         |                   |
| Statistikk [NW/ W]                                                                                                                   | [Gyldige=4689 /-] [Ugyldig=0 /-]                                                                        |         |                   |
| Instruksjoner til intervjueren                                                                                                       | [Bakgrunnsvariabel. Lagrer tilfeldig valgt sivilstatus til profil 1 i konjunksjonsekperimentet R7PAD8.] |         |                   |

| # r7pad8_profile1_4: Karakteristikk til profil 1: sivilstatus. Bakgrunnsvariabel til r7pad8.                                         |                                                                                                                  |         |                              |
|--------------------------------------------------------------------------------------------------------------------------------------|------------------------------------------------------------------------------------------------------------------|---------|------------------------------|
| Verdi                                                                                                                                | Merkelapp                                                                                                        | Enheter | Prosent                      |
|                                                                                                                                      |                                                                                                                  | 3597    | <div><div></div></div> 76.7% |
| Bor alene                                                                                                                            |                                                                                                                  | 383     | <div><div></div></div> 8.2%  |
| Gift                                                                                                                                 |                                                                                                                  | 353     | <div><div></div></div> 7.5%  |
| Samboer                                                                                                                              |                                                                                                                  | 356     | <div><div></div></div> 7.6%  |
| Advarsel: disse tallene indikerer antall enheter (cases) i datafilen. De kan ikke tolkes som oppsummert statistikk for populasjonen. |                                                                                                                  |         |                              |
| # r7pad8_profile1_5: Karakteristikk til profil 1: utdanning. Bakgrunnsvariabel til r7pad8.                                           |                                                                                                                  |         |                              |
| Informasjon                                                                                                                          | [Type= diskret] [Format=character] [Missing=*]                                                                   |         |                              |
| Statistikk [NW/ W]                                                                                                                   | [Gyldige=4689 /-] [Ugyldig=0 /-]                                                                                 |         |                              |
| Instruksjoner til intervjueren                                                                                                       | [Bakgrunnsvariabel. Lagrer tilfeldig valgt utdanningsnivå til profil 1 i konjunksjonsekperimentet R7PAD8.]       |         |                              |
| Verdi                                                                                                                                | Merkelapp                                                                                                        | Enheter | Prosent                      |
|                                                                                                                                      |                                                                                                                  | 3597    | <div><div></div></div> 76.7% |
| Doktorgrad                                                                                                                           |                                                                                                                  | 268     | <div><div></div></div> 5.7%  |
| Grunnskole                                                                                                                           |                                                                                                                  | 303     | <div><div></div></div> 6.5%  |
| Universitet                                                                                                                          |                                                                                                                  | 257     | <div><div></div></div> 5.5%  |
| Videregående                                                                                                                         |                                                                                                                  | 264     | <div><div></div></div> 5.6%  |
| Advarsel: disse tallene indikerer antall enheter (cases) i datafilen. De kan ikke tolkes som oppsummert statistikk for populasjonen. |                                                                                                                  |         |                              |
| # r7pad8_profile1_6: Karakteristikk til profil 1: religion. Bakgrunnsvariabel til r7pad8.                                            |                                                                                                                  |         |                              |
| Informasjon                                                                                                                          | [Type= diskret] [Format=character] [Missing=*]                                                                   |         |                              |
| Statistikk [NW/ W]                                                                                                                   | [Gyldige=4689 /-] [Ugyldig=0 /-]                                                                                 |         |                              |
| Instruksjoner til intervjueren                                                                                                       | [Bakgrunnsvariabel. Lagrer tilfeldig valgt religiøs tilhørighet til profil 1 i konjunksjonsekperimentet R7PAD8.] |         |                              |
| Verdi                                                                                                                                | Merkelapp                                                                                                        | Enheter | Prosent                      |
|                                                                                                                                      |                                                                                                                  | 3597    | <div><div></div></div> 76.7% |
| Ingen                                                                                                                                |                                                                                                                  | 346     | <div><div></div></div> 7.4%  |
| Islam                                                                                                                                |                                                                                                                  | 377     | <div><div></div></div> 8.0%  |
| Kristendom                                                                                                                           |                                                                                                                  | 369     | <div><div></div></div> 7.9%  |
| Advarsel: disse tallene indikerer antall enheter (cases) i datafilen. De kan ikke tolkes som oppsummert statistikk for populasjonen. |                                                                                                                  |         |                              |
| # r7pad8_profile1_7: Karakteristikk til profil 1: arbeidserfaring. Bakgrunnsvariabel til r7pad8.                                     |                                                                                                                  |         |                              |
| Informasjon                                                                                                                          | [Type= diskret] [Format=character] [Missing=*]                                                                   |         |                              |
| Statistikk [NW/ W]                                                                                                                   | [Gyldige=4689 /-] [Ugyldig=0 /-]                                                                                 |         |                              |
| Instruksjoner til intervjueren                                                                                                       | [Bakgrunnsvariabel. Lagrer tilfeldig valgt yrke til profil 1 i konjunksjonsekperimentet R7PAD8.]                 |         |                              |
| Verdi                                                                                                                                | Merkelapp                                                                                                        | Enheter | Prosent                      |
|                                                                                                                                      |                                                                                                                  | 3597    | <div><div></div></div> 76.7% |
| Bonde                                                                                                                                |                                                                                                                  | 180     | <div><div></div></div> 3.8%  |
| IT-konsulent                                                                                                                         |                                                                                                                  | 210     | <div><div></div></div> 4.5%  |
| Ingen                                                                                                                                |                                                                                                                  | 180     | <div><div></div></div> 3.8%  |
| Oljearbeider                                                                                                                         |                                                                                                                  | 176     | <div><div></div></div> 3.8%  |
| Omsorgsarbeider                                                                                                                      |                                                                                                                  | 164     | <div><div></div></div> 3.5%  |
| Selvstendig næringsdrivende                                                                                                          |                                                                                                                  | 182     | <div><div></div></div> 3.9%  |
| Advarsel: disse tallene indikerer antall enheter (cases) i datafilen. De kan ikke tolkes som oppsummert statistikk for populasjonen. |                                                                                                                  |         |                              |

| # r7pad8_profile2_1: Karakteristikk til profil 2: alder. Bakgrunnsvariabel til r7pad8.                                               |                                                                                                         |         |                   |
|--------------------------------------------------------------------------------------------------------------------------------------|---------------------------------------------------------------------------------------------------------|---------|-------------------|
| Informasjon                                                                                                                          | [Type= diskret] [Format=character] [Missing=*]                                                          |         |                   |
| Statistikk [NW/ W]                                                                                                                   | [Gyldige=4689 /-] [Ugyldig=0 /-]                                                                        |         |                   |
| Instruksjoner til intervjueren                                                                                                       | [Bakgrunnsvariabel. Lagrer tilfeldig valgt alder til profil 2 i konjunksjonsekperimentet R7PAD8.]       |         |                   |
| Verdi                                                                                                                                | Merkelapp                                                                                               | Enheter | Prosent           |
|                                                                                                                                      |                                                                                                         | 3597    | <div></div> 76.7% |
| 22 år                                                                                                                                |                                                                                                         | 141     | <div></div> 3.0%  |
| 30 år                                                                                                                                |                                                                                                         | 156     | <div></div> 3.3%  |
| 40 år                                                                                                                                |                                                                                                         | 146     | <div></div> 3.1%  |
| 50 år                                                                                                                                |                                                                                                         | 158     | <div></div> 3.4%  |
| 60 år                                                                                                                                |                                                                                                         | 147     | <div></div> 3.1%  |
| 70 år                                                                                                                                |                                                                                                         | 164     | <div></div> 3.5%  |
| 80 år                                                                                                                                |                                                                                                         | 180     | <div></div> 3.8%  |
| Advarsel: disse tallene indikerer antall enheter (cases) i datafilen. De kan ikke tolkes som oppsummert statistikk for populasjonen. |                                                                                                         |         |                   |
| # r7pad8_profile2_2: Karakteristikk til profil 2: kjønn. Bakgrunnsvariabel til r7pad8.                                               |                                                                                                         |         |                   |
| Informasjon                                                                                                                          | [Type= diskret] [Format=character] [Missing=*]                                                          |         |                   |
| Statistikk [NW/ W]                                                                                                                   | [Gyldige=4689 /-] [Ugyldig=0 /-]                                                                        |         |                   |
| Instruksjoner til intervjueren                                                                                                       | [Bakgrunnsvariabel. Lagrer tilfeldig valgt kjønn til profil 2 i konjunksjonsekperimentet R7PAD8.]       |         |                   |
| Verdi                                                                                                                                | Merkelapp                                                                                               | Enheter | Prosent           |
|                                                                                                                                      |                                                                                                         | 3597    | <div></div> 76.7% |
| Kvinne                                                                                                                               |                                                                                                         | 550     | <div></div> 11.7% |
| Mann                                                                                                                                 |                                                                                                         | 542     | <div></div> 11.6% |
| Advarsel: disse tallene indikerer antall enheter (cases) i datafilen. De kan ikke tolkes som oppsummert statistikk for populasjonen. |                                                                                                         |         |                   |
| # r7pad8_profile2_3: Karakteristikk til profil 2: bosted. Bakgrunnsvariabel til r7pad8.                                              |                                                                                                         |         |                   |
| Informasjon                                                                                                                          | [Type= diskret] [Format=character] [Missing=*]                                                          |         |                   |
| Statistikk [NW/ W]                                                                                                                   | [Gyldige=4689 /-] [Ugyldig=0 /-]                                                                        |         |                   |
| Instruksjoner til intervjueren                                                                                                       | [Bakgrunnsvariabel. Lagrer tilfeldig valgt geografi til profil 2 i konjunksjonsekperimentet R7PAD8.]    |         |                   |
| Verdi                                                                                                                                | Merkelapp                                                                                               | Enheter | Prosent           |
|                                                                                                                                      |                                                                                                         | 3597    | <div></div> 76.7% |
| Midt-Norge                                                                                                                           |                                                                                                         | 179     | <div></div> 3.8%  |
| Nord-Norge                                                                                                                           |                                                                                                         | 155     | <div></div> 3.3%  |
| Oslo                                                                                                                                 |                                                                                                         | 163     | <div></div> 3.5%  |
| Sørlandet                                                                                                                            |                                                                                                         | 192     | <div></div> 4.1%  |
| Vestlandet                                                                                                                           |                                                                                                         | 203     | <div></div> 4.3%  |
| Østlandet                                                                                                                            |                                                                                                         | 200     | <div></div> 4.3%  |
| Advarsel: disse tallene indikerer antall enheter (cases) i datafilen. De kan ikke tolkes som oppsummert statistikk for populasjonen. |                                                                                                         |         |                   |
| # r7pad8_profile2_4: Karakteristikk til profil 2: sivilstatus. Bakgrunnsvariabel til r7pad8.                                         |                                                                                                         |         |                   |
| Informasjon                                                                                                                          | [Type= diskret] [Format=character] [Missing=*]                                                          |         |                   |
| Statistikk [NW/ W]                                                                                                                   | [Gyldige=4689 /-] [Ugyldig=0 /-]                                                                        |         |                   |
| Instruksjoner til intervjueren                                                                                                       | [Bakgrunnsvariabel. Lagrer tilfeldig valgt sivilstatus til profil 2 i konjunksjonsekperimentet R7PAD8.] |         |                   |



| # r7pad8_profile2_4: Karakteristikk til profil 2: sivilstatus. Bakgrunnsvariabel til r7pad8.                                         |                                                                                                                  |         |                              |
|--------------------------------------------------------------------------------------------------------------------------------------|------------------------------------------------------------------------------------------------------------------|---------|------------------------------|
| Verdi                                                                                                                                | Merkelapp                                                                                                        | Enheter | Prosent                      |
|                                                                                                                                      |                                                                                                                  | 3597    | <div><div></div></div> 76.7% |
| Bor alene                                                                                                                            |                                                                                                                  | 376     | <div><div></div></div> 8.0%  |
| Gift                                                                                                                                 |                                                                                                                  | 355     | <div><div></div></div> 7.6%  |
| Samboer                                                                                                                              |                                                                                                                  | 361     | <div><div></div></div> 7.7%  |
| Advarsel: disse tallene indikerer antall enheter (cases) i datafilen. De kan ikke tolkes som oppsummert statistikk for populasjonen. |                                                                                                                  |         |                              |
| # r7pad8_profile2_5: Karakteristikk til profil 2: utdanning. Bakgrunnsvariabel til r7pad8.                                           |                                                                                                                  |         |                              |
| Informasjon                                                                                                                          | [Type= diskret] [Format=character] [Missing=*]                                                                   |         |                              |
| Statistikk [NW/ W]                                                                                                                   | [Gyldige=4689 /-] [Ugyldig=0 /-]                                                                                 |         |                              |
| Instruksjoner til intervjueren                                                                                                       | [Bakgrunnsvariabel. Lagrer tilfeldig valgt utdanningsnivå til profil 2 i konjunksjonsekperimentet R7PAD8.]       |         |                              |
| Verdi                                                                                                                                | Merkelapp                                                                                                        | Enheter | Prosent                      |
|                                                                                                                                      |                                                                                                                  | 3597    | <div><div></div></div> 76.7% |
| Doktorgrad                                                                                                                           |                                                                                                                  | 270     | <div><div></div></div> 5.8%  |
| Grunnskole                                                                                                                           |                                                                                                                  | 259     | <div><div></div></div> 5.5%  |
| Universitet                                                                                                                          |                                                                                                                  | 283     | <div><div></div></div> 6.0%  |
| Videregående                                                                                                                         |                                                                                                                  | 280     | <div><div></div></div> 6.0%  |
| Advarsel: disse tallene indikerer antall enheter (cases) i datafilen. De kan ikke tolkes som oppsummert statistikk for populasjonen. |                                                                                                                  |         |                              |
| # r7pad8_profile2_6: Karakteristikk til profil 2: religion. Bakgrunnsvariabel til r7pad8.                                            |                                                                                                                  |         |                              |
| Informasjon                                                                                                                          | [Type= diskret] [Format=character] [Missing=*]                                                                   |         |                              |
| Statistikk [NW/ W]                                                                                                                   | [Gyldige=4689 /-] [Ugyldig=0 /-]                                                                                 |         |                              |
| Instruksjoner til intervjueren                                                                                                       | [Bakgrunnsvariabel. Lagrer tilfeldig valgt religiøs tilhørighet til profil 2 i konjunksjonsekperimentet R7PAD8.] |         |                              |
| Verdi                                                                                                                                | Merkelapp                                                                                                        | Enheter | Prosent                      |
|                                                                                                                                      |                                                                                                                  | 3597    | <div><div></div></div> 76.7% |
| Ingen                                                                                                                                |                                                                                                                  | 349     | <div><div></div></div> 7.4%  |
| Islam                                                                                                                                |                                                                                                                  | 393     | <div><div></div></div> 8.4%  |
| Kristendom                                                                                                                           |                                                                                                                  | 350     | <div><div></div></div> 7.5%  |
| Advarsel: disse tallene indikerer antall enheter (cases) i datafilen. De kan ikke tolkes som oppsummert statistikk for populasjonen. |                                                                                                                  |         |                              |
| # r7pad8_profile2_7: Karakteristikk til profil 2: arbeidserfaring. Bakgrunnsvariabel til r7pad8.                                     |                                                                                                                  |         |                              |
| Informasjon                                                                                                                          | [Type= diskret] [Format=character] [Missing=*]                                                                   |         |                              |
| Statistikk [NW/ W]                                                                                                                   | [Gyldige=4689 /-] [Ugyldig=0 /-]                                                                                 |         |                              |
| Instruksjoner til intervjueren                                                                                                       | [Bakgrunnsvariabel. Lagrer tilfeldig valgt yrke til profil 2 i konjunksjonsekperimentet R7PAD8.]                 |         |                              |
| Verdi                                                                                                                                | Merkelapp                                                                                                        | Enheter | Prosent                      |
|                                                                                                                                      |                                                                                                                  | 3597    | <div><div></div></div> 76.7% |
| Bonde                                                                                                                                |                                                                                                                  | 190     | <div><div></div></div> 4.1%  |
| IT-konsulent                                                                                                                         |                                                                                                                  | 198     | <div><div></div></div> 4.2%  |
| Ingen                                                                                                                                |                                                                                                                  | 173     | <div><div></div></div> 3.7%  |
| Oljearbeider                                                                                                                         |                                                                                                                  | 175     | <div><div></div></div> 3.7%  |
| Omsorgsarbeider                                                                                                                      |                                                                                                                  | 178     | <div><div></div></div> 3.8%  |
| Selvstendig næringsdrivende                                                                                                          |                                                                                                                  | 178     | <div><div></div></div> 3.8%  |
| Advarsel: disse tallene indikerer antall enheter (cases) i datafilen. De kan ikke tolkes som oppsummert statistikk for populasjonen. |                                                                                                                  |         |                              |

| # r7ran34: [Randomiserer hvis u=3. ]                                                                                                 |                                                                                                                                                                                                                                                                                                                                 |         |             |       |
|--------------------------------------------------------------------------------------------------------------------------------------|---------------------------------------------------------------------------------------------------------------------------------------------------------------------------------------------------------------------------------------------------------------------------------------------------------------------------------|---------|-------------|-------|
| Informasjon                                                                                                                          | [Type= diskret] [Format=numeric] [Rekkevidde= 1-2] [Missing=*]                                                                                                                                                                                                                                                                  |         |             |       |
| Statistikk [NW/ W]                                                                                                                   | [Gyldige=1092 /-] [Ugyldig=3597 /-]                                                                                                                                                                                                                                                                                             |         |             |       |
| Instruksjoner til intervjueren                                                                                                       | [Randomiserer hvis u=3. ]                                                                                                                                                                                                                                                                                                       |         |             |       |
| Verdi                                                                                                                                | Merkelapp                                                                                                                                                                                                                                                                                                                       | Enheter | Prosent     |       |
| 1                                                                                                                                    | 1                                                                                                                                                                                                                                                                                                                               | 559     | <div></div> | 51.2% |
| 2                                                                                                                                    | 2                                                                                                                                                                                                                                                                                                                               | 533     | <div></div> | 48.8% |
| Sysmiss                                                                                                                              |                                                                                                                                                                                                                                                                                                                                 | 3597    |             |       |
| Advarsel: disse tallene indikerer antall enheter (cases) i datafilen. De kan ikke tolkes som oppsummert statistikk for populasjonen. |                                                                                                                                                                                                                                                                                                                                 |         |             |       |
| # r7pad6a: Holdninger relatert til bakgrunn: Personer, «Staten bør bidra til å redusere inntektsforskjeller i samfunnet»             |                                                                                                                                                                                                                                                                                                                                 |         |             |       |
| Informasjon                                                                                                                          | [Type= diskret] [Format=numeric] [Rekkevidde= 1-2] [Missing=*]                                                                                                                                                                                                                                                                  |         |             |       |
| Statistikk [NW/ W]                                                                                                                   | [Gyldige=4689 /-] [Ugyldig=0 /-]                                                                                                                                                                                                                                                                                                |         |             |       |
| Tekst før spørsmål                                                                                                                   | Folk har ulike politiske holdninger, og noen ganger er deres holdninger relatert til deres bakgrunn. Under har vi laget to tenkte personer med forskjellig bakgrunn. Vi ønsker å vite hvilken av disse to du tipper vil være mest enig i påstanden under.<br><br>Vennligst velg hvem du tror er mest enig i følgende påstand:   |         |             |       |
| Spørsmålstekst                                                                                                                       | «Staten bør bidra til å redusere inntektsforskjeller i samfunnet.»<br><br>[Her følger en liste over tilfeldig valgte personkarakteristikker. Se bakgrunnsvariabler.]                                                                                                                                                            |         |             |       |
| Instruksjoner til intervjueren                                                                                                       | [Spurt hvis u=3 og ran34=1. Konjunksjonseksperiment. Respondenten blir bedt om å velge mellom to personprofiler, som tilfeldig varierer i karakteristika, og velge hvilke av de to profilene som mest sannsynlig vil være enig med en gitt påstand.]                                                                            |         |             |       |
| Kommentarer                                                                                                                          | 1 av 3 Folk har ulike politiske holdninger, og noen ganger er deres holdninger relatert til deres bakgrunn. Under har vi                                                                                                                                                                                                        |         |             |       |
| Verdi                                                                                                                                | Merkelapp                                                                                                                                                                                                                                                                                                                       | Enheter | Prosent     |       |
| 1                                                                                                                                    | Person 1                                                                                                                                                                                                                                                                                                                        | 290     | <div></div> | 6.2%  |
| 2                                                                                                                                    | Person 2                                                                                                                                                                                                                                                                                                                        | 259     | <div></div> | 5.5%  |
| 97                                                                                                                                   | Ikke svart                                                                                                                                                                                                                                                                                                                      | 10      | <div></div> | 0.2%  |
| 98                                                                                                                                   | Ikke spurt                                                                                                                                                                                                                                                                                                                      | 4130    | <div></div> | 88.1% |
| Advarsel: disse tallene indikerer antall enheter (cases) i datafilen. De kan ikke tolkes som oppsummert statistikk for populasjonen. |                                                                                                                                                                                                                                                                                                                                 |         |             |       |
| # r7pad6b: Holdninger relatert til bakgrunn: Politikere, «Staten bør bidra til å redusere inntektsforskjeller i samfunnet»           |                                                                                                                                                                                                                                                                                                                                 |         |             |       |
| Informasjon                                                                                                                          | [Type= diskret] [Format=numeric] [Rekkevidde= 1-2] [Missing=*]                                                                                                                                                                                                                                                                  |         |             |       |
| Statistikk [NW/ W]                                                                                                                   | [Gyldige=4689 /-] [Ugyldig=0 /-]                                                                                                                                                                                                                                                                                                |         |             |       |
| Tekst før spørsmål                                                                                                                   | Folk har ulike politiske holdninger, og noen ganger er deres holdninger relatert til deres bakgrunn. Under har vi laget to tenkte politikere med forskjellig bakgrunn. Vi ønsker å vite hvilken av disse to du tipper vil være mest enig i påstanden under.<br><br>Vennligst velg hvem du tror er mest enig i følgende påstand: |         |             |       |
| Spørsmålstekst                                                                                                                       | «Staten bør bidra til å redusere inntektsforskjeller i samfunnet.»<br><br>[Her følger en liste over tilfeldig valgte personkarakteristikker. Se bakgrunnsvariabler.]                                                                                                                                                            |         |             |       |
| Instruksjoner til intervjueren                                                                                                       | [Spurt hvis u=3 og ran34=2. Konjunksjonseksperiment. Respondenten blir bedt om å velge mellom to politikerprofiler, som tilfeldig varierer i karakteristika, og velge hvilke av de to profilene som mest sannsynlig vil være enig med en gitt påstand.]                                                                         |         |             |       |
| Kommentarer                                                                                                                          | 1 av 3 Folk har ulike politiske holdninger, og noen ganger er deres holdninger relatert til deres bakgrunn. Under har vi                                                                                                                                                                                                        |         |             |       |
| Verdi                                                                                                                                | Merkelapp                                                                                                                                                                                                                                                                                                                       | Enheter | Prosent     |       |
| 1                                                                                                                                    | Politiker 1                                                                                                                                                                                                                                                                                                                     | 264     | <div></div> | 5.6%  |
| 2                                                                                                                                    | Politiker2                                                                                                                                                                                                                                                                                                                      | 256     | <div></div> | 5.5%  |
| 97                                                                                                                                   | Ikke svart                                                                                                                                                                                                                                                                                                                      | 13      | <div></div> | 0.3%  |

|                                                                                                                                                               |                                                                                                                                                                                                                                                                                                                                 |         |         |
|---------------------------------------------------------------------------------------------------------------------------------------------------------------|---------------------------------------------------------------------------------------------------------------------------------------------------------------------------------------------------------------------------------------------------------------------------------------------------------------------------------|---------|---------|
| # r7pad6b: Holdninger relatert til bakgrunn: Politikere, «Staten bør bidra til å redusere inntektsforskjeller i samfunnet»                                    |                                                                                                                                                                                                                                                                                                                                 |         |         |
| Verdi                                                                                                                                                         | Merkelapp                                                                                                                                                                                                                                                                                                                       | Enheter | Prosent |
| 98                                                                                                                                                            | Ikke spurt                                                                                                                                                                                                                                                                                                                      | 4156    | 88.6%   |
| Advarsel: disse tallene indikerer antall enheter (cases) i datafilen. De kan ikke tolkes som oppsummert statistikk for populasjonen.                          |                                                                                                                                                                                                                                                                                                                                 |         |         |
| # r7pad7a: Holdninger relatert til bakgrunn: Personer, «Flyktninger bør ha samme rett til sosialhjelp som nordmenn, selv om de ikke er norske statsborgere»   |                                                                                                                                                                                                                                                                                                                                 |         |         |
| Informasjon                                                                                                                                                   | [Type= diskret] [Format=numeric] [Rekkevidde= 1-2] [Missing=*]                                                                                                                                                                                                                                                                  |         |         |
| Statistikk [NW/ W]                                                                                                                                            | [Gyldige=4689 /-] [Ugyldig=0 /-]                                                                                                                                                                                                                                                                                                |         |         |
| Tekst før spørsmål                                                                                                                                            | Folk har ulike politiske holdninger, og noen ganger er deres holdninger relatert til deres bakgrunn. Under har vi laget to tenkte personer med forskjellig bakgrunn. Vi ønsker å vite hvilken av disse to du tipper vil være mest enig i påstanden under.<br><br>Vennligst velg hvem du tror er mest enig i følgende påstand:   |         |         |
| Spørsmålstekst                                                                                                                                                | «Flyktninger bør ha samme rett til sosialhjelp som nordmenn, selv om de ikke er norske statsborgere.»<br><br>[Her følger en liste over tilfeldig valgte personkarakteristikker. Se bakgrunnsvariabler.]                                                                                                                         |         |         |
| Instruksjoner til intervjueren                                                                                                                                | [Spurt hvis u=3 og ran34=1. Konjunksjonseksperiment. Respondenten blir bedt om å velge mellom to personprofiler, som tilfeldig varierer i karakteristika, og velge hvilke av de to profilene som mest sannsynlig vil være enig med en gitt påstand. .]                                                                          |         |         |
| Kommentarer                                                                                                                                                   | 2 av 3 Folk har ulike politiske holdninger, og noen ganger er deres holdninger relatert til deres bakgrunn. Under har vi                                                                                                                                                                                                        |         |         |
| Verdi                                                                                                                                                         | Merkelapp                                                                                                                                                                                                                                                                                                                       | Enheter | Prosent |
| 1                                                                                                                                                             | Person 1                                                                                                                                                                                                                                                                                                                        | 285     | 6.1%    |
| 2                                                                                                                                                             | Person 2                                                                                                                                                                                                                                                                                                                        | 262     | 5.6%    |
| 97                                                                                                                                                            | Ikke svart                                                                                                                                                                                                                                                                                                                      | 12      | 0.3%    |
| 98                                                                                                                                                            | Ikke spurt                                                                                                                                                                                                                                                                                                                      | 4130    | 88.1%   |
| Advarsel: disse tallene indikerer antall enheter (cases) i datafilen. De kan ikke tolkes som oppsummert statistikk for populasjonen.                          |                                                                                                                                                                                                                                                                                                                                 |         |         |
| # r7pad7b: Holdninger relatert til bakgrunn: Politikere, «Flyktninger bør ha samme rett til sosialhjelp som nordmenn, selv om de ikke er norske statsborgere» |                                                                                                                                                                                                                                                                                                                                 |         |         |
| Informasjon                                                                                                                                                   | [Type= diskret] [Format=numeric] [Rekkevidde= 1-2] [Missing=*]                                                                                                                                                                                                                                                                  |         |         |
| Statistikk [NW/ W]                                                                                                                                            | [Gyldige=4689 /-] [Ugyldig=0 /-]                                                                                                                                                                                                                                                                                                |         |         |
| Tekst før spørsmål                                                                                                                                            | Folk har ulike politiske holdninger, og noen ganger er deres holdninger relatert til deres bakgrunn. Under har vi laget to tenkte politikere med forskjellig bakgrunn. Vi ønsker å vite hvilken av disse to du tipper vil være mest enig i påstanden under.<br><br>Vennligst velg hvem du tror er mest enig i følgende påstand: |         |         |
| Spørsmålstekst                                                                                                                                                | «Flyktninger bør ha samme rett til sosialhjelp som nordmenn, selv om de ikke er norske statsborgere.»<br><br>[Her følger en liste over tilfeldig valgte personkarakteristikker. Se bakgrunnsvariabler.]                                                                                                                         |         |         |
| Instruksjoner til intervjueren                                                                                                                                | [Spurt hvis u=3 og ran34=2. Konjunksjonseksperiment. Respondenten blir bedt om å velge mellom to politikerprofiler, som tilfeldig varierer i karakteristika, og velge hvilke av de to profilene som mest sannsynlig vil være enig med en gitt påstand.]                                                                         |         |         |
| Kommentarer                                                                                                                                                   | 2 av 3 Folk har ulike politiske holdninger, og noen ganger er deres holdninger relatert til deres bakgrunn. Under har vi                                                                                                                                                                                                        |         |         |
| Verdi                                                                                                                                                         | Merkelapp                                                                                                                                                                                                                                                                                                                       | Enheter | Prosent |
| 1                                                                                                                                                             | Politiker1                                                                                                                                                                                                                                                                                                                      | 247     | 5.3%    |
| 2                                                                                                                                                             | Politiker2                                                                                                                                                                                                                                                                                                                      | 268     | 5.7%    |
| 97                                                                                                                                                            | Ikke svart                                                                                                                                                                                                                                                                                                                      | 18      | 0.4%    |
| 98                                                                                                                                                            | Ikke spurt                                                                                                                                                                                                                                                                                                                      | 4156    | 88.6%   |
| Advarsel: disse tallene indikerer antall enheter (cases) i datafilen. De kan ikke tolkes som oppsummert statistikk for populasjonen.                          |                                                                                                                                                                                                                                                                                                                                 |         |         |
| # r7pad8a: Holdninger relatert til bakgrunn: Personer, «Mesteparten av utslippsreduksjonene som Norge har forpliktet seg til bør tas i utlandet»              |                                                                                                                                                                                                                                                                                                                                 |         |         |
| Informasjon                                                                                                                                                   | [Type= diskret] [Format=numeric] [Rekkevidde= 1-2] [Missing=*]                                                                                                                                                                                                                                                                  |         |         |

| # r7pad8a: Holdninger relatert til bakgrunn: Personer, «Mesteparten av utslippsreduksjonene som Norge har forpliktet seg til bør tas i utlandet»   |                                                                                                                                                                                                                                                                                                                                |         |             |       |
|----------------------------------------------------------------------------------------------------------------------------------------------------|--------------------------------------------------------------------------------------------------------------------------------------------------------------------------------------------------------------------------------------------------------------------------------------------------------------------------------|---------|-------------|-------|
| Statistikk [NW/ W]                                                                                                                                 | [Gyldige=4689 /-] [Ugyldig=0 /-]                                                                                                                                                                                                                                                                                               |         |             |       |
| Tekst før spørsmål                                                                                                                                 | Folk har ulike politiske holdninger, og noen ganger er deres holdninger relatert til deres bakgrunn. Under har vi laget to tenkte personer med forskjellig bakgrunn. Vi ønsker å vite hvilken av disse to du tipper vil være mest enig i påstanden under.<br><br>Vennligst velg hvem du tror er mest enig i følgende påstand:  |         |             |       |
| Spørsmålstekst                                                                                                                                     | «Mesteparten av utslippsreduksjonene som Norge har forpliktet seg til bør tas i utlandet.»<br><br>[Her følger en liste over tilfeldig valgte personkarakteristikker. Se bakgrunnsvariabler.]                                                                                                                                   |         |             |       |
| Instruksjoner til intervjueren                                                                                                                     | [Spurt hvis u=3 og ran34=1. Konjunksjonseksperiment. Respondenten blir bedt om å velge mellom to personprofiler, som tilfeldig varierer i karakteristika, og velge hvilke av de to profilene som mest sannsynlig vil være enig med en gitt påstand.]                                                                           |         |             |       |
| Kommentarer                                                                                                                                        | 3 av 3 Folk har ulike politiske holdninger, og noen ganger er deres holdninger relatert til deres bakgrunn. Under har vi                                                                                                                                                                                                       |         |             |       |
| Verdi                                                                                                                                              | Merkelapp                                                                                                                                                                                                                                                                                                                      | Enheter | Prosent     |       |
| 1                                                                                                                                                  | Person 1                                                                                                                                                                                                                                                                                                                       | 259     | <div></div> | 5.5%  |
| 2                                                                                                                                                  | Person 2                                                                                                                                                                                                                                                                                                                       | 283     | <div></div> | 6.0%  |
| 97                                                                                                                                                 | Ikke svart                                                                                                                                                                                                                                                                                                                     | 17      | <div></div> | 0.4%  |
| 98                                                                                                                                                 | Ikke spurt                                                                                                                                                                                                                                                                                                                     | 4130    | <div></div> | 88.1% |
| Advarsel: disse tallene indikerer antall enheter (cases) i datafilen. De kan ikke tolkes som oppsummert statistikk for populasjonen.               |                                                                                                                                                                                                                                                                                                                                |         |             |       |
| # r7pad8b: Holdninger relatert til bakgrunn: Politikere, «Mesteparten av utslippsreduksjonene som Norge har forpliktet seg til bør tas i utlandet» |                                                                                                                                                                                                                                                                                                                                |         |             |       |
| Informasjon                                                                                                                                        | [Type= diskret] [Format=numeric] [Rekkevidde= 1-2] [Missing=*]                                                                                                                                                                                                                                                                 |         |             |       |
| Statistikk [NW/ W]                                                                                                                                 | [Gyldige=4689 /-] [Ugyldig=0 /-]                                                                                                                                                                                                                                                                                               |         |             |       |
| Tekst før spørsmål                                                                                                                                 | Folk har ulike politiske holdninger, og noen ganger er deres holdninger relatert til deres bakgrunn. Under har vi generert to tenkte politikere med forskjellig bakgrunn, og vi ønsker å vite hvilken av disse to du mener er mest enig i påstanden under.<br><br>Vennligst velg hvem du tror er mest enig i følgende påstand: |         |             |       |
| Spørsmålstekst                                                                                                                                     | «Mesteparten av utslippsreduksjonene som Norge har forpliktet seg til bør tas i utlandet.»<br><br>[Her følger en liste over tilfeldig valgte personkarakteristikker. Se bakgrunnsvariabler.]                                                                                                                                   |         |             |       |
| Instruksjoner til intervjueren                                                                                                                     | [Spurt hvis u=3 og ran34=2. Konjunksjonseksperiment. Respondenten blir bedt om å velge mellom to politikerprofiler, som tilfeldig varierer i karakteristika, og velge hvilke av de to profilene som mest sannsynlig vil være enig med en gitt påstand.]                                                                        |         |             |       |
| Kommentarer                                                                                                                                        | 3 av 3 Folk har ulike politiske holdninger, og noen ganger er deres holdninger relatert til deres bakgrunn. Under har vi                                                                                                                                                                                                       |         |             |       |
| Verdi                                                                                                                                              | Merkelapp                                                                                                                                                                                                                                                                                                                      | Enheter | Prosent     |       |
| 1                                                                                                                                                  | Politiker1                                                                                                                                                                                                                                                                                                                     | 259     | <div></div> | 5.5%  |
| 2                                                                                                                                                  | Politiker2                                                                                                                                                                                                                                                                                                                     | 253     | <div></div> | 5.4%  |
| 97                                                                                                                                                 | Ikke svart                                                                                                                                                                                                                                                                                                                     | 21      | <div></div> | 0.4%  |
| 98                                                                                                                                                 | Ikke spurt                                                                                                                                                                                                                                                                                                                     | 4156    | <div></div> | 88.6% |
| Advarsel: disse tallene indikerer antall enheter (cases) i datafilen. De kan ikke tolkes som oppsummert statistikk for populasjonen.               |                                                                                                                                                                                                                                                                                                                                |         |             |       |
| # r7fri1_1: Utført frivillig arbeid: Kunst og kultur, korps og kor                                                                                 |                                                                                                                                                                                                                                                                                                                                |         |             |       |
| Informasjon                                                                                                                                        | [Type= diskret] [Format=numeric] [Rekkevidde= 1-1] [Missing=*]                                                                                                                                                                                                                                                                 |         |             |       |
| Statistikk [NW/ W]                                                                                                                                 | [Gyldige=4689 /-] [Ugyldig=0 /-]                                                                                                                                                                                                                                                                                               |         |             |       |
| Tekst før spørsmål                                                                                                                                 | Har du i løpet av de siste 12 måneder utført frivillig, ulønnet arbeidsinnsats for frivillige organisasjoner på noen av følgende områder:                                                                                                                                                                                      |         |             |       |
| Spørsmålstekst                                                                                                                                     | Kunst og kultur, korps og kor[Musikk, teater og dans. Kunst, brukskunst og arkitektur. Historie, litteratur og språk. Museer, samlinger og biblioteker. Tidsskrifter og medier. Andre kulturelle og kunstneriske aktiviteter]                                                                                                  |         |             |       |
| Instruksjoner til intervjueren                                                                                                                     | [Spurt hvis u=1. ]                                                                                                                                                                                                                                                                                                             |         |             |       |
| Kommentarer                                                                                                                                        | Kunst og kultur, korps og kor[Musikk, teater og dans. Kunst, brukskunst og arkitektur. Historie, litteratur og språk. Mu                                                                                                                                                                                                       |         |             |       |

| # r7fri1_1: Utført frivillig arbeid: Kunst og kultur, korps og kor                                                                   |                                                                                                                                                                                                                                                                                              |         |                              |
|--------------------------------------------------------------------------------------------------------------------------------------|----------------------------------------------------------------------------------------------------------------------------------------------------------------------------------------------------------------------------------------------------------------------------------------------|---------|------------------------------|
| Verdi                                                                                                                                | Merkelapp                                                                                                                                                                                                                                                                                    | Enheter | Prosent                      |
| 0                                                                                                                                    |                                                                                                                                                                                                                                                                                              | 971     | <div><div></div></div> 20.7% |
| 1                                                                                                                                    | Kunst og kultur, korps og kor                                                                                                                                                                                                                                                                | 199     | <div><div></div></div> 4.2%  |
| 97                                                                                                                                   | Ikke svart                                                                                                                                                                                                                                                                                   | 14      | <div><div></div></div> 0.3%  |
| 98                                                                                                                                   | Ikke spurt                                                                                                                                                                                                                                                                                   | 3505    | <div><div></div></div> 74.7% |
| Advarsel: disse tallene indikerer antall enheter (cases) i datafilen. De kan ikke tolkes som oppsummert statistikk for populasjonen. |                                                                                                                                                                                                                                                                                              |         |                              |
| # r7fri1_2: Utført frivillig arbeid: Idrett og sport                                                                                 |                                                                                                                                                                                                                                                                                              |         |                              |
| Informasjon                                                                                                                          | [Type= diskret] [Format=numeric] [Rekkevidde= 1-1] [Missing=*]                                                                                                                                                                                                                               |         |                              |
| Statistikk [NW/ W]                                                                                                                   | [Gyldige=4689 /-] [Ugyldig=0 /-]                                                                                                                                                                                                                                                             |         |                              |
| Tekst før spørsmål                                                                                                                   | Har du i løpet av de siste 12 måneder utført frivillig, ulønnet arbeidsinnsats for frivillige organisasjoner på noen av følgende områder:                                                                                                                                                    |         |                              |
| Spørsmålstekst                                                                                                                       | Idrett og sport[Alle typer idrett, sport og trim, skytterlag, bedriftsidrett og idrett for funksjonshemmede]                                                                                                                                                                                 |         |                              |
| Instruksjoner til intervjueren                                                                                                       | [Spurt hvis u=1. ]                                                                                                                                                                                                                                                                           |         |                              |
| Kommentarer                                                                                                                          | Idrett og sport[Alle typer idrett, sport og trim, skytterlag, bedriftsidrett og idrett for funksjonshemmede] (Har du i l                                                                                                                                                                     |         |                              |
| Verdi                                                                                                                                | Merkelapp                                                                                                                                                                                                                                                                                    | Enheter | Prosent                      |
| 0                                                                                                                                    |                                                                                                                                                                                                                                                                                              | 887     | <div><div></div></div> 18.9% |
| 1                                                                                                                                    | Idrett og sport                                                                                                                                                                                                                                                                              | 283     | <div><div></div></div> 6.0%  |
| 97                                                                                                                                   | Ikke svart                                                                                                                                                                                                                                                                                   | 14      | <div><div></div></div> 0.3%  |
| 98                                                                                                                                   | Ikke spurt                                                                                                                                                                                                                                                                                   | 3505    | <div><div></div></div> 74.7% |
| Advarsel: disse tallene indikerer antall enheter (cases) i datafilen. De kan ikke tolkes som oppsummert statistikk for populasjonen. |                                                                                                                                                                                                                                                                                              |         |                              |
| # r7fri1_3: Utført frivillig arbeid: Hobby, fritid, utendørsaktivitet                                                                |                                                                                                                                                                                                                                                                                              |         |                              |
| Informasjon                                                                                                                          | [Type= diskret] [Format=numeric] [Rekkevidde= 1-1] [Missing=*]                                                                                                                                                                                                                               |         |                              |
| Statistikk [NW/ W]                                                                                                                   | [Gyldige=4689 /-] [Ugyldig=0 /-]                                                                                                                                                                                                                                                             |         |                              |
| Tekst før spørsmål                                                                                                                   | Har du i løpet av de siste 12 måneder utført frivillig, ulønnet arbeidsinnsats for frivillige organisasjoner på noen av følgende områder:                                                                                                                                                    |         |                              |
| Spørsmålstekst                                                                                                                       | Hobby, fritid, utendørsaktivitet[Friluftsliv og speideren. Motor og båtforening. Dyreeierklubber. Pensjonistlag. Studentsamfunn. Sosiale klubber – Rotary, Lions etc. Andre hobby- og fritidsaktiviteter]                                                                                    |         |                              |
| Instruksjoner til intervjueren                                                                                                       | [Spurt hvis u=1. ]                                                                                                                                                                                                                                                                           |         |                              |
| Kommentarer                                                                                                                          | Hobby, fritid, utendørsaktivitet[Friluftsliv og speideren. Motor og båtforening. Dyreeierklubber. Pensjonistlag. Studen                                                                                                                                                                      |         |                              |
| Verdi                                                                                                                                | Merkelapp                                                                                                                                                                                                                                                                                    | Enheter | Prosent                      |
| 0                                                                                                                                    |                                                                                                                                                                                                                                                                                              | 951     | <div><div></div></div> 20.3% |
| 1                                                                                                                                    | Hobby, fritid, utendørsaktivitet                                                                                                                                                                                                                                                             | 219     | <div><div></div></div> 4.7%  |
| 97                                                                                                                                   | Ikke svart                                                                                                                                                                                                                                                                                   | 14      | <div><div></div></div> 0.3%  |
| 98                                                                                                                                   | Ikke spurt                                                                                                                                                                                                                                                                                   | 3505    | <div><div></div></div> 74.7% |
| Advarsel: disse tallene indikerer antall enheter (cases) i datafilen. De kan ikke tolkes som oppsummert statistikk for populasjonen. |                                                                                                                                                                                                                                                                                              |         |                              |
| # r7fri1_4: Utført frivillig arbeid: Utdanning, opplæring og forskning                                                               |                                                                                                                                                                                                                                                                                              |         |                              |
| Informasjon                                                                                                                          | [Type= diskret] [Format=numeric] [Rekkevidde= 1-1] [Missing=*]                                                                                                                                                                                                                               |         |                              |
| Statistikk [NW/ W]                                                                                                                   | [Gyldige=4689 /-] [Ugyldig=0 /-]                                                                                                                                                                                                                                                             |         |                              |
| Tekst før spørsmål                                                                                                                   | Har du i løpet av de siste 12 måneder utført frivillig, ulønnet arbeidsinnsats for frivillige organisasjoner på noen av følgende områder:                                                                                                                                                    |         |                              |
| Spørsmålstekst                                                                                                                       | Utdanning, opplæring og forskning[Barne- og ungdomsskoler inkludert FAU i offentlige skoler, men dugnader bare i private skoler. Videregående skoler. Folkehøgskoler. Universiteter og høyskoler. Yrkesrettet/teknisk utdanning. Voksenopplæring og videreutdanning. Forskning og utvikling] |         |                              |

| # r7fri1_4: Utført frivillig arbeid: Utdanning, opplæring og forskning                                                               |                                                                                                                                                                                                                                |         |             |       |
|--------------------------------------------------------------------------------------------------------------------------------------|--------------------------------------------------------------------------------------------------------------------------------------------------------------------------------------------------------------------------------|---------|-------------|-------|
| Instruksjoner til intervjueren                                                                                                       | [Spurt hvis u=1. ]                                                                                                                                                                                                             |         |             |       |
| Kommentarer                                                                                                                          | Utdanning, opplæring og forskning[Barne- og ungdomsskoler inkludert FAU i offentlige skoler, men dugnader bare i private                                                                                                       |         |             |       |
| Verdi                                                                                                                                | Merkelapp                                                                                                                                                                                                                      | Enheter | Prosent     |       |
| 0                                                                                                                                    |                                                                                                                                                                                                                                | 1051    | <div></div> | 22.4% |
| 1                                                                                                                                    | Utdanning, opplæring og forskning                                                                                                                                                                                              | 119     | <div></div> | 2.5%  |
| 97                                                                                                                                   | Ikke svart                                                                                                                                                                                                                     | 14      | <div></div> | 0.3%  |
| 98                                                                                                                                   | Ikke spurt                                                                                                                                                                                                                     | 3505    | <div></div> | 74.7% |
| Advarsel: disse tallene indikerer antall enheter (cases) i datafilen. De kan ikke tolkes som oppsummert statistikk for populasjonen. |                                                                                                                                                                                                                                |         |             |       |
| # r7fri1_5: Utført frivillig arbeid: Helse, pleie og redningsarbeid                                                                  |                                                                                                                                                                                                                                |         |             |       |
| Informasjon                                                                                                                          | [Type= diskret] [Format=numeric] [Rekkevidde= 1-1] [Missing=*]                                                                                                                                                                 |         |             |       |
| Statistikk [NW/ W]                                                                                                                   | [Gyldige=4689 /-] [Ugyldig=0 /-]                                                                                                                                                                                               |         |             |       |
| Tekst før spørsmål                                                                                                                   | Har du i løpet av de siste 12 måneder utført frivillig, ulønnet arbeidsinnsats for frivillige organisasjoner på noen av følgende områder:                                                                                      |         |             |       |
| Spørsmålstekst                                                                                                                       | Helse, pleie og redningsarbeid[Sykehus. Rehabilitering. Sykehjem. Omsorgsbolig og hjemmetjenestene. Psykiatriske institusjoner. Polikliniske helsetjenester. Alternativ medisin. Redningsarbeid og ambulansetjenester]         |         |             |       |
| Instruksjoner til intervjueren                                                                                                       | [Spurt hvis u=1. ]                                                                                                                                                                                                             |         |             |       |
| Kommentarer                                                                                                                          | Helse, pleie og redningsarbeid[Sykehus. Rehabilitering. Sykehjem. Omsorgsbolig og hjemmetjenestene. Psykiatriske institus]                                                                                                     |         |             |       |
| Verdi                                                                                                                                | Merkelapp                                                                                                                                                                                                                      | Enheter | Prosent     |       |
| 0                                                                                                                                    |                                                                                                                                                                                                                                | 1105    | <div></div> | 23.6% |
| 1                                                                                                                                    | Helse, pleie og redningsarbeid                                                                                                                                                                                                 | 65      | <div></div> | 1.4%  |
| 97                                                                                                                                   | Ikke svart                                                                                                                                                                                                                     | 14      | <div></div> | 0.3%  |
| 98                                                                                                                                   | Ikke spurt                                                                                                                                                                                                                     | 3505    | <div></div> | 74.7% |
| Advarsel: disse tallene indikerer antall enheter (cases) i datafilen. De kan ikke tolkes som oppsummert statistikk for populasjonen. |                                                                                                                                                                                                                                |         |             |       |
| # r7fri1_6: Utført frivillig arbeid: Sosiale tjenester og rusmiddelomsorg                                                            |                                                                                                                                                                                                                                |         |             |       |
| Informasjon                                                                                                                          | [Type= diskret] [Format=numeric] [Rekkevidde= 1-1] [Missing=*]                                                                                                                                                                 |         |             |       |
| Statistikk [NW/ W]                                                                                                                   | [Gyldige=4689 /-] [Ugyldig=0 /-]                                                                                                                                                                                               |         |             |       |
| Tekst før spørsmål                                                                                                                   | Har du i løpet av de siste 12 måneder utført frivillig, ulønnet arbeidsinnsats for frivillige organisasjoner på noen av følgende områder:                                                                                      |         |             |       |
| Spørsmålstekst                                                                                                                       | Sosiale tjenester og rusmiddelomsorg[Barnehager. Røde kors. Blå kors. Norsk folkehjelp. Familierådgiving. Krisesentre og -telefoner. Tjenester for funksjonshemmede. Tjenester for eldre. Selvhjelp og frivillighetssentraler] |         |             |       |
| Instruksjoner til intervjueren                                                                                                       | [Spurt hvis u=1. ]                                                                                                                                                                                                             |         |             |       |
| Kommentarer                                                                                                                          | Sosiale tjenester og rusmiddelomsorg[Barnehager. Røde kors. Blå kors. Norsk folkehjelp. Familierådgiving. Krisesentre                                                                                                          |         |             |       |
| Verdi                                                                                                                                | Merkelapp                                                                                                                                                                                                                      | Enheter | Prosent     |       |
| 0                                                                                                                                    |                                                                                                                                                                                                                                | 1091    | <div></div> | 23.3% |
| 1                                                                                                                                    | Sosiale tjenester og rusmiddelomsorg                                                                                                                                                                                           | 79      | <div></div> | 1.7%  |
| 97                                                                                                                                   | Ikke svart                                                                                                                                                                                                                     | 14      | <div></div> | 0.3%  |
| 98                                                                                                                                   | Ikke spurt                                                                                                                                                                                                                     | 3505    | <div></div> | 74.7% |
| Advarsel: disse tallene indikerer antall enheter (cases) i datafilen. De kan ikke tolkes som oppsummert statistikk for populasjonen. |                                                                                                                                                                                                                                |         |             |       |
| # r7fri1_7: Utført frivillig arbeid: Natur-, miljø- og dyrevern                                                                      |                                                                                                                                                                                                                                |         |             |       |
| Informasjon                                                                                                                          | [Type= diskret] [Format=numeric] [Rekkevidde= 1-1] [Missing=*]                                                                                                                                                                 |         |             |       |
| Statistikk [NW/ W]                                                                                                                   | [Gyldige=4689 /-] [Ugyldig=0 /-]                                                                                                                                                                                               |         |             |       |

| # r7fri1_7: Utført frivillig arbeid: Natur-, miljø- og dyrevern                                                                      |                                                                                                                                           |                |                |
|--------------------------------------------------------------------------------------------------------------------------------------|-------------------------------------------------------------------------------------------------------------------------------------------|----------------|----------------|
| <b>Tekst før spørsmål</b>                                                                                                            | Har du i løpet av de siste 12 måneder utført frivillig, ulønnet arbeidsinnsats for frivillige organisasjoner på noen av følgende områder: |                |                |
| <b>Spørsmålstekst</b>                                                                                                                | Natur-, miljø- og dyrevern[Natur- og miljøvern. Områdevern og områdeforvaltning. Dyrever. Veterinærtjenester]                             |                |                |
| <b>Instruksjoner til intervjueren</b>                                                                                                | [Spurt hvis u=1. ]                                                                                                                        |                |                |
| <b>Kommentarer</b>                                                                                                                   | Natur-, miljø- og dyrevern[Natur- og miljøvern. Områdevern og områdeforvaltning. Dyrever. Veterinærtjenester] (Har                        |                |                |
| <b>Verdi</b>                                                                                                                         | <b>Merkelapp</b>                                                                                                                          | <b>Enheter</b> | <b>Prosent</b> |
| 0                                                                                                                                    |                                                                                                                                           | 1139           | 24.3%          |
| 1                                                                                                                                    | Natur-, miljø- og dyrevern                                                                                                                | 31             | 0.7%           |
| 97                                                                                                                                   | Ikke svart                                                                                                                                | 14             | 0.3%           |
| 98                                                                                                                                   | Ikke spurt                                                                                                                                | 3505           | 74.7%          |
| Advarsel: disse tallene indikerer antall enheter (cases) i datafilen. De kan ikke tolkes som oppsummert statistikk for populasjonen. |                                                                                                                                           |                |                |
| # r7fri1_8: Utført frivillig arbeid: Velforeninger, grendelag og nærmiljø                                                            |                                                                                                                                           |                |                |
| <b>Informasjon</b>                                                                                                                   | [Type= diskret] [Format=numeric] [Rekkevidde= 1-1] [Missing=*]                                                                            |                |                |
| <b>Statistikk [NW/ W]</b>                                                                                                            | [Gyldige=4689 /-] [Ugyldig=0 /-]                                                                                                          |                |                |
| <b>Tekst før spørsmål</b>                                                                                                            | Har du i løpet av de siste 12 måneder utført frivillig, ulønnet arbeidsinnsats for frivillige organisasjoner på noen av følgende områder: |                |                |
| <b>Spørsmålstekst</b>                                                                                                                | Velforeninger, grendelag og nærmiljø[Forsamlingshus]                                                                                      |                |                |
| <b>Instruksjoner til intervjueren</b>                                                                                                | [Spurt hvis u=1. ]                                                                                                                        |                |                |
| <b>Kommentarer</b>                                                                                                                   | Velforeninger, grendelag og nærmiljø[Forsamlingshus] (Har du i løpet av de siste 12 måneder utført frivillig, ulønn                       |                |                |
| <b>Verdi</b>                                                                                                                         | <b>Merkelapp</b>                                                                                                                          | <b>Enheter</b> | <b>Prosent</b> |
| 0                                                                                                                                    |                                                                                                                                           | 1027           | 21.9%          |
| 1                                                                                                                                    | Velforeninger, grendelag og nærmiljø                                                                                                      | 143            | 3.0%           |
| 97                                                                                                                                   | Ikke svart                                                                                                                                | 14             | 0.3%           |
| 98                                                                                                                                   | Ikke spurt                                                                                                                                | 3505           | 74.7%          |
| Advarsel: disse tallene indikerer antall enheter (cases) i datafilen. De kan ikke tolkes som oppsummert statistikk for populasjonen. |                                                                                                                                           |                |                |
| # r7fri1_9: Utført frivillig arbeid: Borettslag og boligbyggelag                                                                     |                                                                                                                                           |                |                |
| <b>Informasjon</b>                                                                                                                   | [Type= diskret] [Format=numeric] [Rekkevidde= 1-1] [Missing=*]                                                                            |                |                |
| <b>Statistikk [NW/ W]</b>                                                                                                            | [Gyldige=4689 /-] [Ugyldig=0 /-]                                                                                                          |                |                |
| <b>Tekst før spørsmål</b>                                                                                                            | Har du i løpet av de siste 12 måneder utført frivillig, ulønnet arbeidsinnsats for frivillige organisasjoner på noen av følgende områder: |                |                |
| <b>Spørsmålstekst</b>                                                                                                                | Borettslag og boligbyggelag[Huseierforening]                                                                                              |                |                |
| <b>Instruksjoner til intervjueren</b>                                                                                                | [Spurt hvis u=1. ]                                                                                                                        |                |                |
| <b>Kommentarer</b>                                                                                                                   | Borettslag og boligbyggelag[Huseierforening] (Har du i løpet av de siste 12 måneder utført frivillig, ulønnet arbeids                     |                |                |
| <b>Verdi</b>                                                                                                                         | <b>Merkelapp</b>                                                                                                                          | <b>Enheter</b> | <b>Prosent</b> |
| 0                                                                                                                                    |                                                                                                                                           | 1034           | 22.1%          |
| 1                                                                                                                                    | Borettslag og boligbyggelag                                                                                                               | 136            | 2.9%           |
| 97                                                                                                                                   | Ikke svart                                                                                                                                | 14             | 0.3%           |
| 98                                                                                                                                   | Ikke spurt                                                                                                                                | 3505           | 74.7%          |
| Advarsel: disse tallene indikerer antall enheter (cases) i datafilen. De kan ikke tolkes som oppsummert statistikk for populasjonen. |                                                                                                                                           |                |                |
| # r7fri1_10: Utført frivillig arbeid: Rettighets-, støtte- og påvirkningsarbeid                                                      |                                                                                                                                           |                |                |
| <b>Informasjon</b>                                                                                                                   | [Type= diskret] [Format=numeric] [Rekkevidde= 1-1] [Missing=*]                                                                            |                |                |

# r7fri1\_10: Utført frivillig arbeid: Rettighets-, støtte- og påvirkningsarbeid

Statistikk [NW/ W]

[Gyldige=4689 /-] [Ugyldig=0 /-]

Tekst før spørsmål

Har du i løpet av de siste 12 måneder utført frivillig, ulønnet arbeidsinnsats for frivillige organisasjoner på noen av følgende områder:

Spørsmålstekst

Rettighets-, støtte- og påvirkningsarbeid[Funksjonshemmede og syke. Kvinnesak. Mållag. Etniske minoriteter. Svake/utsatte grupper, innsatte, fattige. Kampanjer og lobbyvirksomhet]

Instruksjoner til intervjueren

[Spurt hvis u=1. ]

Kommentarer

Rettighets-, støtte- og påvirkningsarbeid[Funksjonshemmede og syke. Kvinnesak. Mållag. Etniske minoriteter. Svake/utsa

| Verdi | Merkelapp                                 | Enheter | Prosent           |
|-------|-------------------------------------------|---------|-------------------|
| 0     |                                           | 1146    | <div></div> 24.4% |
| 1     | Rettighets-, støtte- og påvirkningsarbeid | 24      | <div></div> 0.5%  |
| 97    | Ikke svart                                | 14      | <div></div> 0.3%  |
| 98    | Ikke spurt                                | 3505    | <div></div> 74.7% |

Advarsel: disse tallene indikerer antall enheter (cases) i datafilen. De kan ikke tolkes som oppsummert statistikk for populasjonen.

# r7fri1\_11: Utført frivillig arbeid: Politiske partier

Informasjon

[Type= diskret] [Format=numeric] [Rekkevidde= 1-1] [Missing=\*]

Statistikk [NW/ W]

[Gyldige=4689 /-] [Ugyldig=0 /-]

Tekst før spørsmål

Har du i løpet av de siste 12 måneder utført frivillig, ulønnet arbeidsinnsats for frivillige organisasjoner på noen av følgende områder:

Spørsmålstekst

Politiske partier[Ungdomspartier]

Instruksjoner til intervjueren

[Spurt hvis u=1. ]

Kommentarer

Politiske partier[Ungdomspartier] (Har du i løpet av de siste 12 måneder utført frivillig, ulønnet arbeidsinnsats for

| Verdi | Merkelapp         | Enheter | Prosent           |
|-------|-------------------|---------|-------------------|
| 0     |                   | 1152    | <div></div> 24.6% |
| 1     | Politiske partier | 18      | <div></div> 0.4%  |
| 97    | Ikke svart        | 14      | <div></div> 0.3%  |
| 98    | Ikke spurt        | 3505    | <div></div> 74.7% |

Advarsel: disse tallene indikerer antall enheter (cases) i datafilen. De kan ikke tolkes som oppsummert statistikk for populasjonen.

# r7fri1\_12: Utført frivillig arbeid: Internasjonal utveksling, nødhjelp, bistand og menneskerettighetsarbeid

Informasjon

[Type= diskret] [Format=numeric] [Rekkevidde= 1-1] [Missing=\*]

Statistikk [NW/ W]

[Gyldige=4689 /-] [Ugyldig=0 /-]

Tekst før spørsmål

Har du i løpet av de siste 12 måneder utført frivillig, ulønnet arbeidsinnsats for frivillige organisasjoner på noen av følgende områder:

Spørsmålstekst

Internasjonal utveksling, nødhjelp, bistand og menneskerettighetsarbeid[Internasjonale vennskaps- og utvekslingsprogrammer. Internasjonalt nødhjelps- og bistandsarbeid. Menneskerettighets- og fredsarbeid]

Instruksjoner til intervjueren

[Spurt hvis u=1. ]

Kommentarer

Internasjonal utveksling, nødhjelp, bistand og menneskerettighetsarbeid[Internasjonale vennskaps- og utvekslingsprogramm

| Verdi | Merkelapp                                                               | Enheter | Prosent           |
|-------|-------------------------------------------------------------------------|---------|-------------------|
| 0     |                                                                         | 1125    | <div></div> 24.0% |
| 1     | Internasjonal utveksling, nødhjelp, bistand og menneskerettighetsarbeid | 45      | <div></div> 1.0%  |
| 97    | Ikke svart                                                              | 14      | <div></div> 0.3%  |
| 98    | Ikke spurt                                                              | 3505    | <div></div> 74.7% |

Advarsel: disse tallene indikerer antall enheter (cases) i datafilen. De kan ikke tolkes som oppsummert statistikk for populasjonen.



| # r7fri1_13: Utført frivillig arbeid: Yrkes-, bransje- og fagforeninger                                                              |                                                                                                                                                                                                                  |         |                   |
|--------------------------------------------------------------------------------------------------------------------------------------|------------------------------------------------------------------------------------------------------------------------------------------------------------------------------------------------------------------|---------|-------------------|
| Informasjon                                                                                                                          | [Type= diskret] [Format=numeric] [Rekkevidde= 1-1] [Missing=*]                                                                                                                                                   |         |                   |
| Statistikk [NW/ W]                                                                                                                   | [Gyldige=4689 /-] [Ugyldig=0 /-]                                                                                                                                                                                 |         |                   |
| Tekst før spørsmål                                                                                                                   | Har du i løpet av de siste 12 måneder utført frivillig, ulønnet arbeidsinnsats for frivillige organisasjoner på noen av følgende områder:                                                                        |         |                   |
| Spørsmålstekst                                                                                                                       | Yrkes-, bransje- og fagforeninger[Arbeidstakerorganisasjoner. Arbeidsgiverorganisasjoner. Bransje- og næringssammenslutninger. Produsentkooperativer. Elev- og studentorganisasjoner.]                           |         |                   |
| Instruksjoner til intervjueren                                                                                                       | [Spurt hvis u=1. ]                                                                                                                                                                                               |         |                   |
| Kommentarer                                                                                                                          | Yrkes-, bransje- og fagforeninger[Arbeidstakerorganisasjoner. Arbeidsgiverorganisasjoner. Bransje- og næringssammenslutn                                                                                         |         |                   |
| Verdi                                                                                                                                | Merkelapp                                                                                                                                                                                                        | Enheter | Prosent           |
| 0                                                                                                                                    |                                                                                                                                                                                                                  | 1099    | <div></div> 23.4% |
| 1                                                                                                                                    | Yrkes-, bransje- og fagforeninger                                                                                                                                                                                | 71      | <div></div> 1.5%  |
| 97                                                                                                                                   | Ikke svart                                                                                                                                                                                                       | 14      | <div></div> 0.3%  |
| 98                                                                                                                                   | Ikke spurt                                                                                                                                                                                                       | 3505    | <div></div> 74.7% |
| Advarsel: disse tallene indikerer antall enheter (cases) i datafilen. De kan ikke tolkes som oppsummert statistikk for populasjonen. |                                                                                                                                                                                                                  |         |                   |
| # r7fri1_14: Utført frivillig arbeid: Religion og livssyn inkludert den norske kirke                                                 |                                                                                                                                                                                                                  |         |                   |
| Informasjon                                                                                                                          | [Type= diskret] [Format=numeric] [Rekkevidde= 1-1] [Missing=*]                                                                                                                                                   |         |                   |
| Statistikk [NW/ W]                                                                                                                   | [Gyldige=4689 /-] [Ugyldig=0 /-]                                                                                                                                                                                 |         |                   |
| Tekst før spørsmål                                                                                                                   | Har du i løpet av de siste 12 måneder utført frivillig, ulønnet arbeidsinnsats for frivillige organisasjoner på noen av følgende områder:                                                                        |         |                   |
| Spørsmålstekst                                                                                                                       | Religion og livssyn inkludert den norske kirke[Organisasjoner tilknyttet den norske kirke. Misjon. Protestantisk frikirke. Andre religioner. Livssynsorganisasjoner, også ikke-religiøse som Humanetisk forbund] |         |                   |
| Instruksjoner til intervjueren                                                                                                       | [Spurt hvis u=1. ]                                                                                                                                                                                               |         |                   |
| Kommentarer                                                                                                                          | Religion og livssyn inkludert den norske kirke[Organisasjoner tilknyttet den norske kirke. Misjon. Protestantisk frikirke                                                                                        |         |                   |
| Verdi                                                                                                                                | Merkelapp                                                                                                                                                                                                        | Enheter | Prosent           |
| 0                                                                                                                                    |                                                                                                                                                                                                                  | 1089    | <div></div> 23.2% |
| 1                                                                                                                                    | Religion og livssyn inkludert den norske kirke                                                                                                                                                                   | 81      | <div></div> 1.7%  |
| 97                                                                                                                                   | Ikke svart                                                                                                                                                                                                       | 14      | <div></div> 0.3%  |
| 98                                                                                                                                   | Ikke spurt                                                                                                                                                                                                       | 3505    | <div></div> 74.7% |
| Advarsel: disse tallene indikerer antall enheter (cases) i datafilen. De kan ikke tolkes som oppsummert statistikk for populasjonen. |                                                                                                                                                                                                                  |         |                   |
| # r7fri1_15: Utført frivillig arbeid: Innvandererorganisasjoner                                                                      |                                                                                                                                                                                                                  |         |                   |
| Informasjon                                                                                                                          | [Type= diskret] [Format=numeric] [Rekkevidde= 1-1] [Missing=*]                                                                                                                                                   |         |                   |
| Statistikk [NW/ W]                                                                                                                   | [Gyldige=4689 /-] [Ugyldig=0 /-]                                                                                                                                                                                 |         |                   |
| Tekst før spørsmål                                                                                                                   | Har du i løpet av de siste 12 måneder utført frivillig, ulønnet arbeidsinnsats for frivillige organisasjoner på noen av følgende områder:                                                                        |         |                   |
| Spørsmålstekst                                                                                                                       | Innvandererorganisasjoner[Organisasjoner knyttet til landbakgrunn, kultur, identitet utenfor Norge]                                                                                                              |         |                   |
| Instruksjoner til intervjueren                                                                                                       | [Spurt hvis u=1. ]                                                                                                                                                                                               |         |                   |
| Kommentarer                                                                                                                          | Innvandererorganisasjoner[Organisasjoner knyttet til landbakgrunn, kultur, identitet utenfor Norge] (Har du i løpet av de                                                                                        |         |                   |
| Verdi                                                                                                                                | Merkelapp                                                                                                                                                                                                        | Enheter | Prosent           |
| 0                                                                                                                                    |                                                                                                                                                                                                                  | 1154    | <div></div> 24.6% |
| 1                                                                                                                                    | Innvandererorganisasjoner                                                                                                                                                                                        | 16      | <div></div> 0.3%  |
| 97                                                                                                                                   | Ikke svart                                                                                                                                                                                                       | 14      | <div></div> 0.3%  |
| 98                                                                                                                                   | Ikke spurt                                                                                                                                                                                                       | 3505    | <div></div> 74.7% |

|                                                                                                                                             |
|---------------------------------------------------------------------------------------------------------------------------------------------|
| <b># r7fri1_15: Utført frivillig arbeid: Innvandrersorganisasjoner</b>                                                                      |
| <i>Advarsel: disse tallene indikerer antall enheter (cases) i datafilen. De kan ikke tolkes som oppsummert statistikk for populasjonen.</i> |

| # r7fri1_16: Utført frivillig arbeid: Annet, spesifiser                                                                              |                                                                                                                                           |         |             |        |
|--------------------------------------------------------------------------------------------------------------------------------------|-------------------------------------------------------------------------------------------------------------------------------------------|---------|-------------|--------|
| Informasjon                                                                                                                          | [Type= diskret] [Format=numeric] [Rekkevidde= 1-1] [Missing=*]                                                                            |         |             |        |
| Statistikk [NW/ W]                                                                                                                   | [Gyldige=4689 /-] [Ugyldig=0 /-]                                                                                                          |         |             |        |
| Tekst før spørsmål                                                                                                                   | Har du i løpet av de siste 12 måneder utført frivillig, ulønnet arbeidsinnsats for frivillige organisasjoner på noen av følgende områder: |         |             |        |
| Spørsmålstekst                                                                                                                       | Annet, spesifiser                                                                                                                         |         |             |        |
| Instruksjoner til intervjueren                                                                                                       | [Spurt hvis u=1. ]                                                                                                                        |         |             |        |
| Kommentarer                                                                                                                          | Annet, spesifiser (Har du i løpet av de siste 12 måneder utført frivillig, ulønnet arbeidsinnsats for frivillige orga                     |         |             |        |
| Verdi                                                                                                                                | Merkelapp                                                                                                                                 | Enheter | Prosent     |        |
| 0                                                                                                                                    |                                                                                                                                           | 1139    | <div></div> | 24.3%  |
| 1                                                                                                                                    | Annet, spesifiser                                                                                                                         | 31      | <div></div> | 0.7%   |
| 97                                                                                                                                   | Ikke svart                                                                                                                                | 14      | <div></div> | 0.3%   |
| 98                                                                                                                                   | Ikke spurt                                                                                                                                | 3505    | <div></div> | 74.7%  |
| Advarsel: disse tallene indikerer antall enheter (cases) i datafilen. De kan ikke tolkes som oppsummert statistikk for populasjonen. |                                                                                                                                           |         |             |        |
| # r7fri1_16_other: Utført frivillig arbeid: Annet, spesifiser [anonymisert]                                                          |                                                                                                                                           |         |             |        |
| Informasjon                                                                                                                          | [Type= diskret] [Format=character] [Missing=*]                                                                                            |         |             |        |
| Statistikk [NW/ W]                                                                                                                   | [Gyldige=4689 /-] [Ugyldig=0 /-]                                                                                                          |         |             |        |
| Tekst før spørsmål                                                                                                                   | Har du i løpet av de siste 12 måneder utført frivillig, ulønnet arbeidsinnsats for frivillige organisasjoner på noen av følgende områder: |         |             |        |
| Spørsmålstekst                                                                                                                       | Annet, spesifiser                                                                                                                         |         |             |        |
| Instruksjoner til intervjueren                                                                                                       | [Spurt hvis u=1. ]<br>[Data tilbakeholdt av hensyn til anonymitet]                                                                        |         |             |        |
| Kommentarer                                                                                                                          | Annet, spesifiser (Har du i løpet av de siste 12 måneder utført frivillig, ulønnet arbeidsinnsats for frivillige orga                     |         |             |        |
| Verdi                                                                                                                                | Merkelapp                                                                                                                                 | Enheter | Prosent     |        |
|                                                                                                                                      |                                                                                                                                           | 4689    | <div></div> | 100.0% |
| Advarsel: disse tallene indikerer antall enheter (cases) i datafilen. De kan ikke tolkes som oppsummert statistikk for populasjonen. |                                                                                                                                           |         |             |        |
| # r7fri1_17: Nei, ikke utført frivillig arbeid                                                                                       |                                                                                                                                           |         |             |        |
| Informasjon                                                                                                                          | [Type= diskret] [Format=numeric] [Rekkevidde= 1-1] [Missing=*]                                                                            |         |             |        |
| Statistikk [NW/ W]                                                                                                                   | [Gyldige=4689 /-] [Ugyldig=0 /-]                                                                                                          |         |             |        |
| Tekst før spørsmål                                                                                                                   | Har du i løpet av de siste 12 måneder utført frivillig, ulønnet arbeidsinnsats for frivillige organisasjoner på noen av følgende områder: |         |             |        |
| Spørsmålstekst                                                                                                                       | Nei                                                                                                                                       |         |             |        |
| Instruksjoner til intervjueren                                                                                                       | [Spurt hvis u=1. ]                                                                                                                        |         |             |        |
| Kommentarer                                                                                                                          | Nei (Har du i løpet av de siste 12 måneder utført frivillig, ulønnet arbeidsinnsats for frivillige organisasjoner på                      |         |             |        |
| Verdi                                                                                                                                | Merkelapp                                                                                                                                 | Enheter | Prosent     |        |
| 0                                                                                                                                    |                                                                                                                                           | 795     | <div></div> | 17.0%  |
| 1                                                                                                                                    | Nei                                                                                                                                       | 375     | <div></div> | 8.0%   |
| 97                                                                                                                                   | Ikke svart                                                                                                                                | 14      | <div></div> | 0.3%   |
| 98                                                                                                                                   | Ikke spurt                                                                                                                                | 3505    | <div></div> | 74.7%  |
| Advarsel: disse tallene indikerer antall enheter (cases) i datafilen. De kan ikke tolkes som oppsummert statistikk for populasjonen. |                                                                                                                                           |         |             |        |
| # r7fri2: Hvor mye tid på frivillig arbeid i uken, det siste året                                                                    |                                                                                                                                           |         |             |        |
| Informasjon                                                                                                                          | [Type= diskret] [Format=numeric] [Rekkevidde= 1-5] [Missing=*]                                                                            |         |             |        |

| # r7fri2: Hvor mye tid på frivillig arbeid i uken, det siste året                                                                    |                                                                                                                                                                                                           |         |         |
|--------------------------------------------------------------------------------------------------------------------------------------|-----------------------------------------------------------------------------------------------------------------------------------------------------------------------------------------------------------|---------|---------|
| Statistikk [NW/ W]                                                                                                                   | [Gyldige=4689 /-] [Ugyldig=0 /-]                                                                                                                                                                          |         |         |
| Spørsmålstekst                                                                                                                       | Om du tenker på det siste året under ett, omtrent hvor mye tid brukte du på frivillig arbeid i en vanlig uke?                                                                                             |         |         |
| Instruksjoner til intervjueren                                                                                                       | [Spurt hvis u=1 og R7FRI1_17!=1. ]                                                                                                                                                                        |         |         |
| Kommentarer                                                                                                                          | Om du tenker på det siste året under ett, omtrent hvor mye tid brukte du på frivillig arbeid i en vanlig uke?                                                                                             |         |         |
| Verdi                                                                                                                                | Merkelapp                                                                                                                                                                                                 | Enheter | Prosent |
| 1                                                                                                                                    | Mindre enn en halvtime                                                                                                                                                                                    | 274     | 5.8%    |
| 2                                                                                                                                    | Mellom en halvtime og time                                                                                                                                                                                | 153     | 3.3%    |
| 3                                                                                                                                    | 1 til 2 timer                                                                                                                                                                                             | 157     | 3.3%    |
| 4                                                                                                                                    | 2 til 5 timer                                                                                                                                                                                             | 110     | 2.3%    |
| 5                                                                                                                                    | Mer enn 5 timer                                                                                                                                                                                           | 84      | 1.8%    |
| 97                                                                                                                                   | Ikke svart                                                                                                                                                                                                | 31      | 0.7%    |
| 98                                                                                                                                   | Ikke spurt                                                                                                                                                                                                | 3880    | 82.7%   |
| Advarsel: disse tallene indikerer antall enheter (cases) i datafilen. De kan ikke tolkes som oppsummert statistikk for populasjonen. |                                                                                                                                                                                                           |         |         |
| # r7fri1b_1: Utført hvilket frivillig arbeid innenfor helse/pleie/redningsarbeid: Helse                                              |                                                                                                                                                                                                           |         |         |
| Informasjon                                                                                                                          | [Type= diskret] [Format=numeric] [Rekkevidde= 1-1] [Missing=*]                                                                                                                                            |         |         |
| Statistikk [NW/ W]                                                                                                                   | [Gyldige=4689 /-] [Ugyldig=0 /-]                                                                                                                                                                          |         |         |
| Tekst før spørsmål                                                                                                                   | Du har svart at du har utført frivillig, ulønnet arbeidsinnsats for frivillige organisasjoner innenfor helse, pleie og redningsarbeid. Innenfor hvilke av disse områdene har du utført frivillig innsats? |         |         |
| Spørsmålstekst                                                                                                                       | Helse                                                                                                                                                                                                     |         |         |
| Tekst etter spørsmål                                                                                                                 | Flere kryss mulig                                                                                                                                                                                         |         |         |
| Instruksjoner til intervjueren                                                                                                       | [Spurt hvis u=1 og R7FRI1_5=1. ]                                                                                                                                                                          |         |         |
| Kommentarer                                                                                                                          | Helse (Du har svart at du har utført frivillig, ulønnet arbeidsinnsats for frivillige organisasjoner innenfor helse, pl                                                                                   |         |         |
| Verdi                                                                                                                                | Merkelapp                                                                                                                                                                                                 | Enheter | Prosent |
| 0                                                                                                                                    |                                                                                                                                                                                                           | 33      | 0.7%    |
| 1                                                                                                                                    | Helse                                                                                                                                                                                                     | 31      | 0.7%    |
| 97                                                                                                                                   | Ikke svart                                                                                                                                                                                                | 1       | 0.0%    |
| 98                                                                                                                                   | Ikke spurt                                                                                                                                                                                                | 4624    | 98.6%   |
| Advarsel: disse tallene indikerer antall enheter (cases) i datafilen. De kan ikke tolkes som oppsummert statistikk for populasjonen. |                                                                                                                                                                                                           |         |         |
| # r7fri1b_2: Utført hvilket frivillig arbeid innenfor helse/pleie/redningsarbeid: Pleie                                              |                                                                                                                                                                                                           |         |         |
| Informasjon                                                                                                                          | [Type= diskret] [Format=numeric] [Rekkevidde= 1-1] [Missing=*]                                                                                                                                            |         |         |
| Statistikk [NW/ W]                                                                                                                   | [Gyldige=4689 /-] [Ugyldig=0 /-]                                                                                                                                                                          |         |         |
| Tekst før spørsmål                                                                                                                   | Du har svart at du har utført frivillig, ulønnet arbeidsinnsats for frivillige organisasjoner innenfor helse, pleie og redningsarbeid. Innenfor hvilke av disse områdene har du utført frivillig innsats? |         |         |
| Spørsmålstekst                                                                                                                       | Pleie                                                                                                                                                                                                     |         |         |
| Tekst etter spørsmål                                                                                                                 | Flere kryss mulig                                                                                                                                                                                         |         |         |
| Instruksjoner til intervjueren                                                                                                       | [Spurt hvis u=1 og R7FRI1_5=1. ]                                                                                                                                                                          |         |         |
| Kommentarer                                                                                                                          | Pleie (Du har svart at du har utført frivillig, ulønnet arbeidsinnsats for frivillige organisasjoner innenfor helse, pl                                                                                   |         |         |
| Verdi                                                                                                                                | Merkelapp                                                                                                                                                                                                 | Enheter | Prosent |
| 0                                                                                                                                    |                                                                                                                                                                                                           | 36      | 0.8%    |
| 1                                                                                                                                    | Pleie                                                                                                                                                                                                     | 28      | 0.6%    |
| 97                                                                                                                                   | Ikke svart                                                                                                                                                                                                | 1       | 0.0%    |

| # r7fri1b_2: Utført hvilket frivillig arbeid innenfor helse/pleie/redningsarbeid: Pleie                                              |                                                                                                                                                                                                                                                                                                       |         |                   |
|--------------------------------------------------------------------------------------------------------------------------------------|-------------------------------------------------------------------------------------------------------------------------------------------------------------------------------------------------------------------------------------------------------------------------------------------------------|---------|-------------------|
| Verdi                                                                                                                                | Merkelapp                                                                                                                                                                                                                                                                                             | Enheter | Prosent           |
| 98                                                                                                                                   | Ikke spurt                                                                                                                                                                                                                                                                                            | 4624    | <div></div> 98.6% |
| Advarsel: disse tallene indikerer antall enheter (cases) i datafilen. De kan ikke tolkes som oppsummert statistikk for populasjonen. |                                                                                                                                                                                                                                                                                                       |         |                   |
| # r7fri1b_3: Utført hvilket frivillig arbeid innenfor helse/pleie/redningsarbeid: Beredskap/Redningsarbeid                           |                                                                                                                                                                                                                                                                                                       |         |                   |
| Informasjon                                                                                                                          | [Type= diskret] [Format=numeric] [Rekkevidde= 1-1] [Missing=*]                                                                                                                                                                                                                                        |         |                   |
| Statistikk [NW/ W]                                                                                                                   | [Gyldige=4689 /-] [Ugyldig=0 /-]                                                                                                                                                                                                                                                                      |         |                   |
| Tekst før spørsmål                                                                                                                   | Du har svart at du har utført frivillig, ulønnet arbeidsinnsats for frivillige organisasjoner innenfor helse, pleie og redningsarbeid. Innenfor hvilke av disse områdene har du utført frivillig innsats?                                                                                             |         |                   |
| Spørsmålstekst                                                                                                                       | Beredskap/Redningsarbeid                                                                                                                                                                                                                                                                              |         |                   |
| Tekst etter spørsmål                                                                                                                 | Flere kryss mulig                                                                                                                                                                                                                                                                                     |         |                   |
| Instruksjoner til intervjueren                                                                                                       | [Spurt hvis u=1 og R7FRI1_5=1. ]                                                                                                                                                                                                                                                                      |         |                   |
| Kommentarer                                                                                                                          | Beredskap/Redningsarbeid (Du har svart at du har utført frivillig, ulønnet arbeidsinnsats for frivillige organisasjoner                                                                                                                                                                               |         |                   |
| Verdi                                                                                                                                | Merkelapp                                                                                                                                                                                                                                                                                             | Enheter | Prosent           |
| 0                                                                                                                                    |                                                                                                                                                                                                                                                                                                       | 51      | <div></div> 1.1%  |
| 1                                                                                                                                    | Beredskap/Redningsarbeid                                                                                                                                                                                                                                                                              | 13      | <div></div> 0.3%  |
| 97                                                                                                                                   | Ikke svart                                                                                                                                                                                                                                                                                            | 1       | <div></div> 0.0%  |
| 98                                                                                                                                   | Ikke spurt                                                                                                                                                                                                                                                                                            | 4624    | <div></div> 98.6% |
| Advarsel: disse tallene indikerer antall enheter (cases) i datafilen. De kan ikke tolkes som oppsummert statistikk for populasjonen. |                                                                                                                                                                                                                                                                                                       |         |                   |
| # r7fri4_1: Kjennskap til beredskapsarbeidet i Norge                                                                                 |                                                                                                                                                                                                                                                                                                       |         |                   |
| Informasjon                                                                                                                          | [Type= diskret] [Format=numeric] [Rekkevidde= 1-5] [Missing=*]                                                                                                                                                                                                                                        |         |                   |
| Statistikk [NW/ W]                                                                                                                   | [Gyldige=4689 /-] [Ugyldig=0 /-]                                                                                                                                                                                                                                                                      |         |                   |
| Tekst før spørsmål                                                                                                                   | Når noen er savnet, har blitt skadet ute i naturen eller hvis store ulykker inntreffer, aktiveres et omfattende apparat av frivillige som hjelper politiet å lete etter savnede. De frivillige er medlemmer i ulike beredskapsorganisasjoner og er trent i søk, sporing, førstehjelp, navigasjon osv. |         |                   |
| Spørsmålstekst                                                                                                                       | Hvor godt vil du si at du kjenner til beredskapsarbeidet i Norge?                                                                                                                                                                                                                                     |         |                   |
| Instruksjoner til intervjueren                                                                                                       | [Spurt hvis u=1. ]                                                                                                                                                                                                                                                                                    |         |                   |
| Kommentarer                                                                                                                          | Hvor godt vil du si at du kjenner til beredskapsarbeidet i Norge? (Når noen er savnet, har blitt skadet ute i naturen el                                                                                                                                                                              |         |                   |
| Verdi                                                                                                                                | Merkelapp                                                                                                                                                                                                                                                                                             | Enheter | Prosent           |
| 1                                                                                                                                    | Svært godt                                                                                                                                                                                                                                                                                            | 41      | <div></div> 0.9%  |
| 2                                                                                                                                    | Godt                                                                                                                                                                                                                                                                                                  | 432     | <div></div> 9.2%  |
| 3                                                                                                                                    | Lite                                                                                                                                                                                                                                                                                                  | 532     | <div></div> 11.3% |
| 4                                                                                                                                    | Svært lite                                                                                                                                                                                                                                                                                            | 129     | <div></div> 2.8%  |
| 5                                                                                                                                    | Ikke i det hele tatt                                                                                                                                                                                                                                                                                  | 27      | <div></div> 0.6%  |
| 97                                                                                                                                   | Ikke svart                                                                                                                                                                                                                                                                                            | 23      | <div></div> 0.5%  |
| 98                                                                                                                                   | Ikke spurt                                                                                                                                                                                                                                                                                            | 3505    | <div></div> 74.7% |
| Advarsel: disse tallene indikerer antall enheter (cases) i datafilen. De kan ikke tolkes som oppsummert statistikk for populasjonen. |                                                                                                                                                                                                                                                                                                       |         |                   |
| # r7fri4_2: Kjennskap til de frivillige beredskapsorganisasjonene                                                                    |                                                                                                                                                                                                                                                                                                       |         |                   |
| Informasjon                                                                                                                          | [Type= diskret] [Format=numeric] [Rekkevidde= 1-5] [Missing=*]                                                                                                                                                                                                                                        |         |                   |
| Statistikk [NW/ W]                                                                                                                   | [Gyldige=4689 /-] [Ugyldig=0 /-]                                                                                                                                                                                                                                                                      |         |                   |
| Tekst før spørsmål                                                                                                                   | Når noen er savnet, har blitt skadet ute i naturen eller hvis store ulykker inntreffer, aktiveres et omfattende apparat av frivillige som hjelper politiet å lete etter savnede. De frivillige er medlemmer i ulike beredskapsorganisasjoner og er trent i søk, sporing, førstehjelp, navigasjon osv. |         |                   |
| Spørsmålstekst                                                                                                                       | Hvor godt vil du si at du kjenner til de frivillige beredskapsorganisasjonene?                                                                                                                                                                                                                        |         |                   |

| # r7fri4_2: Kjennskap til de frivillige beredskapsorganisasjonene                                                                    |                                                                                                                          |         |                   |
|--------------------------------------------------------------------------------------------------------------------------------------|--------------------------------------------------------------------------------------------------------------------------|---------|-------------------|
| Instruksjoner til intervjueren                                                                                                       | [Spurt hvis u=1. ]                                                                                                       |         |                   |
| Kommentarer                                                                                                                          | Hvor godt vil du si at du kjenner til de frivillige beredskapsorganisasjonene? (Når noen er savnet, har blitt skadet ute |         |                   |
| Verdi                                                                                                                                | Merkelapp                                                                                                                | Enheter | Prosent           |
| 1                                                                                                                                    | Svært godt                                                                                                               | 30      | <div></div> 0.6%  |
| 2                                                                                                                                    | Godt                                                                                                                     | 442     | <div></div> 9.4%  |
| 3                                                                                                                                    | Lite                                                                                                                     | 544     | <div></div> 11.6% |
| 4                                                                                                                                    | Svært lite                                                                                                               | 113     | <div></div> 2.4%  |
| 5                                                                                                                                    | Ikke i det hele tatt                                                                                                     | 28      | <div></div> 0.6%  |
| 97                                                                                                                                   | Ikke svart                                                                                                               | 27      | <div></div> 0.6%  |
| 98                                                                                                                                   | Ikke spurt                                                                                                               | 3505    | <div></div> 74.7% |
| Advarsel: disse tallene indikerer antall enheter (cases) i datafilen. De kan ikke tolkes som oppsummert statistikk for populasjonen. |                                                                                                                          |         |                   |
| # r7fri4c_1: Hørt om frivillige beredskapsorganisasjoner: NAKs flytjeneste                                                           |                                                                                                                          |         |                   |
| Informasjon                                                                                                                          | [Type= diskret] [Format=numeric] [Rekkevidde= 1-1] [Missing=*]                                                           |         |                   |
| Statistikk [NW/ W]                                                                                                                   | [Gyldige=4689 /-] [Ugyldig=0 /-]                                                                                         |         |                   |
| Tekst før spørsmål                                                                                                                   | Hvilke av disse frivillige beredskapsorganisasjonene har du hørt om?                                                     |         |                   |
| Spørsmålstekst                                                                                                                       | NAKs flytjeneste                                                                                                         |         |                   |
| Instruksjoner til intervjueren                                                                                                       | [Spurt hvis u=1. ]                                                                                                       |         |                   |
| Kommentarer                                                                                                                          | NAKs flytjeneste (Hvilke av disse frivillige beredskapsorganisasjonene har du hørt om?)                                  |         |                   |
| Verdi                                                                                                                                | Merkelapp                                                                                                                | Enheter | Prosent           |
| 0                                                                                                                                    |                                                                                                                          | 1113    | <div></div> 23.7% |
| 1                                                                                                                                    | NAKs flytjeneste                                                                                                         | 55      | <div></div> 1.2%  |
| 97                                                                                                                                   | Ikke svart                                                                                                               | 16      | <div></div> 0.3%  |
| 98                                                                                                                                   | Ikke spurt                                                                                                               | 3505    | <div></div> 74.7% |
| Advarsel: disse tallene indikerer antall enheter (cases) i datafilen. De kan ikke tolkes som oppsummert statistikk for populasjonen. |                                                                                                                          |         |                   |
| # r7fri4c_2: Hørt om frivillig beredskapsorganisasjon: Norske redningshunder                                                         |                                                                                                                          |         |                   |
| Informasjon                                                                                                                          | [Type= diskret] [Format=numeric] [Rekkevidde= 1-1] [Missing=*]                                                           |         |                   |
| Statistikk [NW/ W]                                                                                                                   | [Gyldige=4689 /-] [Ugyldig=0 /-]                                                                                         |         |                   |
| Tekst før spørsmål                                                                                                                   | Hvilke av disse frivillige beredskapsorganisasjonene har du hørt om?                                                     |         |                   |
| Spørsmålstekst                                                                                                                       | Norske redningshunder                                                                                                    |         |                   |
| Instruksjoner til intervjueren                                                                                                       | [Spurt hvis u=1. ]                                                                                                       |         |                   |
| Kommentarer                                                                                                                          | Norske redningshunder (Hvilke av disse frivillige beredskapsorganisasjonene har du hørt om?)                             |         |                   |
| Verdi                                                                                                                                | Merkelapp                                                                                                                | Enheter | Prosent           |
| 0                                                                                                                                    |                                                                                                                          | 326     | <div></div> 7.0%  |
| 1                                                                                                                                    | Norske redningshunder                                                                                                    | 842     | <div></div> 18.0% |
| 97                                                                                                                                   | Ikke svart                                                                                                               | 16      | <div></div> 0.3%  |
| 98                                                                                                                                   | Ikke spurt                                                                                                               | 3505    | <div></div> 74.7% |
| Advarsel: disse tallene indikerer antall enheter (cases) i datafilen. De kan ikke tolkes som oppsummert statistikk for populasjonen. |                                                                                                                          |         |                   |
| # r7fri4c_3: Hørt om frivillig beredskapsorganisasjon: Norsk Folkehjelp Sanitet                                                      |                                                                                                                          |         |                   |
| Informasjon                                                                                                                          | [Type= diskret] [Format=numeric] [Rekkevidde= 1-1] [Missing=*]                                                           |         |                   |
| Statistikk [NW/ W]                                                                                                                   | [Gyldige=4689 /-] [Ugyldig=0 /-]                                                                                         |         |                   |

| # r7fri4c_3: Hørt om frivillig beredskapsorganisasjon: Norsk Folkehjelp Sanitet                                                      |                          |                                                                                                 |                   |
|--------------------------------------------------------------------------------------------------------------------------------------|--------------------------|-------------------------------------------------------------------------------------------------|-------------------|
| Tekst før spørsmål                                                                                                                   |                          | Hvilke av disse frivillige beredskapsorganisasjonene har du hørt om?                            |                   |
| Spørsmålstekst                                                                                                                       |                          | Norsk Folkehjelp Sanitet                                                                        |                   |
| Instruksjoner til intervjueren                                                                                                       |                          | [Spurt hvis u=1. ]                                                                              |                   |
| Kommentarer                                                                                                                          |                          | Norsk Folkehjelp Sanitet (Hvilke av disse frivillige beredskapsorganisasjonene har du hørt om?) |                   |
| Verdi                                                                                                                                | Merkelapp                | Enheter                                                                                         | Prosent           |
| 0                                                                                                                                    |                          | 292                                                                                             | <div></div> 6.2%  |
| 1                                                                                                                                    | Norsk Folkehjelp Sanitet | 876                                                                                             | <div></div> 18.7% |
| 97                                                                                                                                   | Ikke svart               | 16                                                                                              | <div></div> 0.3%  |
| 98                                                                                                                                   | Ikke spurt               | 3505                                                                                            | <div></div> 74.7% |
| Advarsel: disse tallene indikerer antall enheter (cases) i datafilen. De kan ikke tolkes som oppsummert statistikk for populasjonen. |                          |                                                                                                 |                   |
| # r7fri4c_4: Hørt om frivillig beredskapsorganisasjon: Norsk Grotteforbund                                                           |                          |                                                                                                 |                   |
| Informasjon                                                                                                                          |                          | [Type= diskret] [Format=numeric] [Rekkevidde= 1-1] [Missing=*]                                  |                   |
| Statistikk [NW/ W]                                                                                                                   |                          | [Gyldige=4689 /-] [Ugyldig=0 /-]                                                                |                   |
| Tekst før spørsmål                                                                                                                   |                          | Hvilke av disse frivillige beredskapsorganisasjonene har du hørt om?                            |                   |
| Spørsmålstekst                                                                                                                       |                          | Norsk Grotteforbund                                                                             |                   |
| Instruksjoner til intervjueren                                                                                                       |                          | [Spurt hvis u=1. ]                                                                              |                   |
| Kommentarer                                                                                                                          |                          | Norsk Grotteforbund (Hvilke av disse frivillige beredskapsorganisasjonene har du hørt om?)      |                   |
| Verdi                                                                                                                                | Merkelapp                | Enheter                                                                                         | Prosent           |
| 0                                                                                                                                    |                          | 1120                                                                                            | <div></div> 23.9% |
| 1                                                                                                                                    | Norsk Grotteforbund      | 48                                                                                              | <div></div> 1.0%  |
| 97                                                                                                                                   | Ikke svart               | 16                                                                                              | <div></div> 0.3%  |
| 98                                                                                                                                   | Ikke spurt               | 3505                                                                                            | <div></div> 74.7% |
| Advarsel: disse tallene indikerer antall enheter (cases) i datafilen. De kan ikke tolkes som oppsummert statistikk for populasjonen. |                          |                                                                                                 |                   |
| # r7fri4c_5: Hørt om frivillig beredskapsorganisasjon: Norsk Radio Relæ Liga                                                         |                          |                                                                                                 |                   |
| Informasjon                                                                                                                          |                          | [Type= diskret] [Format=numeric] [Rekkevidde= 1-1] [Missing=*]                                  |                   |
| Statistikk [NW/ W]                                                                                                                   |                          | [Gyldige=4689 /-] [Ugyldig=0 /-]                                                                |                   |
| Tekst før spørsmål                                                                                                                   |                          | Hvilke av disse frivillige beredskapsorganisasjonene har du hørt om?                            |                   |
| Spørsmålstekst                                                                                                                       |                          | Norsk Radio Relæ Liga                                                                           |                   |
| Instruksjoner til intervjueren                                                                                                       |                          | [Spurt hvis u=1. ]                                                                              |                   |
| Kommentarer                                                                                                                          |                          | Norsk Radio Relæ Liga (Hvilke av disse frivillige beredskapsorganisasjonene har du hørt om?)    |                   |
| Verdi                                                                                                                                | Merkelapp                | Enheter                                                                                         | Prosent           |
| 0                                                                                                                                    |                          | 1076                                                                                            | <div></div> 22.9% |
| 1                                                                                                                                    | Norsk Radio Relæ Liga    | 92                                                                                              | <div></div> 2.0%  |
| 97                                                                                                                                   | Ikke svart               | 16                                                                                              | <div></div> 0.3%  |
| 98                                                                                                                                   | Ikke spurt               | 3505                                                                                            | <div></div> 74.7% |
| Advarsel: disse tallene indikerer antall enheter (cases) i datafilen. De kan ikke tolkes som oppsummert statistikk for populasjonen. |                          |                                                                                                 |                   |
| # r7fri4c_6: Hørt om frivillig beredskapsorganisasjon: Rovernes Beredskapsgruppe                                                     |                          |                                                                                                 |                   |
| Informasjon                                                                                                                          |                          | [Type= diskret] [Format=numeric] [Rekkevidde= 1-1] [Missing=*]                                  |                   |
| Statistikk [NW/ W]                                                                                                                   |                          | [Gyldige=4689 /-] [Ugyldig=0 /-]                                                                |                   |
| Tekst før spørsmål                                                                                                                   |                          | Hvilke av disse frivillige beredskapsorganisasjonene har du hørt om?                            |                   |

| # r7fri4c_6: Hørt om frivillig beredskapsorganisasjon: Rovernes Beredskapsgruppe                                                     |                                                                                                  |         |                              |
|--------------------------------------------------------------------------------------------------------------------------------------|--------------------------------------------------------------------------------------------------|---------|------------------------------|
| Spørsmålstekst                                                                                                                       | Rovernes Beredskapsgruppe                                                                        |         |                              |
| Instruksjoner til intervjueren                                                                                                       | [Spurt hvis u=1. ]                                                                               |         |                              |
| Kommentarer                                                                                                                          | Rovernes Beredskapsgruppe (Hvilke av disse frivillige beredskapsorganisasjonene har du hørt om?) |         |                              |
| Verdi                                                                                                                                | Merkelapp                                                                                        | Enheter | Prosent                      |
| 0                                                                                                                                    |                                                                                                  | 1089    | <div><div></div></div> 23.2% |
| 1                                                                                                                                    | Rovernes Beredskapsgruppe                                                                        | 79      | <div><div></div></div> 1.7%  |
| 97                                                                                                                                   | Ikke svart                                                                                       | 16      | <div><div></div></div> 0.3%  |
| 98                                                                                                                                   | Ikke spurt                                                                                       | 3505    | <div><div></div></div> 74.7% |
| Advarsel: disse tallene indikerer antall enheter (cases) i datafilen. De kan ikke tolkes som oppsummert statistikk for populasjonen. |                                                                                                  |         |                              |
| # r7fri4c_7: Hørt om frivillig beredskapsorganisasjon: Røde Kors Hjelpekorps                                                         |                                                                                                  |         |                              |
| Informasjon                                                                                                                          | [Type= diskret] [Format=numeric] [Rekkevidde= 1-1] [Missing=*]                                   |         |                              |
| Statistikk [NW/ W]                                                                                                                   | [Gyldige=4689 /-] [Ugyldig=0 /-]                                                                 |         |                              |
| Tekst før spørsmål                                                                                                                   | Hvilke av disse frivillige beredskapsorganisasjonene har du hørt om?                             |         |                              |
| Spørsmålstekst                                                                                                                       | Røde Kors Hjelpekorps                                                                            |         |                              |
| Instruksjoner til intervjueren                                                                                                       | [Spurt hvis u=1. ]                                                                               |         |                              |
| Kommentarer                                                                                                                          | Røde Kors Hjelpekorps (Hvilke av disse frivillige beredskapsorganisasjonene har du hørt om?)     |         |                              |
| Verdi                                                                                                                                | Merkelapp                                                                                        | Enheter | Prosent                      |
| 0                                                                                                                                    |                                                                                                  | 22      | <div><div></div></div> 0.5%  |
| 1                                                                                                                                    | Røde Kors Hjelpekorps                                                                            | 1146    | <div><div></div></div> 24.4% |
| 97                                                                                                                                   | Ikke svart                                                                                       | 16      | <div><div></div></div> 0.3%  |
| 98                                                                                                                                   | Ikke spurt                                                                                       | 3505    | <div><div></div></div> 74.7% |
| Advarsel: disse tallene indikerer antall enheter (cases) i datafilen. De kan ikke tolkes som oppsummert statistikk for populasjonen. |                                                                                                  |         |                              |
| # r7fri4c_8: Hørt om frivillig beredskapsorganisasjon: Redningsselskapet                                                             |                                                                                                  |         |                              |
| Informasjon                                                                                                                          | [Type= diskret] [Format=numeric] [Rekkevidde= 1-1] [Missing=*]                                   |         |                              |
| Statistikk [NW/ W]                                                                                                                   | [Gyldige=4689 /-] [Ugyldig=0 /-]                                                                 |         |                              |
| Tekst før spørsmål                                                                                                                   | Hvilke av disse frivillige beredskapsorganisasjonene har du hørt om?                             |         |                              |
| Spørsmålstekst                                                                                                                       | Redningsselskapet                                                                                |         |                              |
| Instruksjoner til intervjueren                                                                                                       | [Spurt hvis u=1. ]                                                                               |         |                              |
| Kommentarer                                                                                                                          | Redningsselskapet (Hvilke av disse frivillige beredskapsorganisasjonene har du hørt om?)         |         |                              |
| Verdi                                                                                                                                | Merkelapp                                                                                        | Enheter | Prosent                      |
| 0                                                                                                                                    |                                                                                                  | 74      | <div><div></div></div> 1.6%  |
| 1                                                                                                                                    | Redningsselskapet                                                                                | 1094    | <div><div></div></div> 23.3% |
| 97                                                                                                                                   | Ikke svart                                                                                       | 16      | <div><div></div></div> 0.3%  |
| 98                                                                                                                                   | Ikke spurt                                                                                       | 3505    | <div><div></div></div> 74.7% |
| Advarsel: disse tallene indikerer antall enheter (cases) i datafilen. De kan ikke tolkes som oppsummert statistikk for populasjonen. |                                                                                                  |         |                              |
| # r7fri4d: Medlem av organisasjon som deltar i beredskapsarbeid i Norge                                                              |                                                                                                  |         |                              |
| Informasjon                                                                                                                          | [Type= diskret] [Format=numeric] [Rekkevidde= 1-2] [Missing=*]                                   |         |                              |
| Statistikk [NW/ W]                                                                                                                   | [Gyldige=4689 /-] [Ugyldig=0 /-]                                                                 |         |                              |
| Spørsmålstekst                                                                                                                       | Er du medlem av en organisasjon som deltar i beredskapsarbeidet i Norge?                         |         |                              |



| # r7fri4d: Medlem av organisasjon som deltar i beredskapsarbeid i Norge                                                              |                  |                                                                                    |                        |       |
|--------------------------------------------------------------------------------------------------------------------------------------|------------------|------------------------------------------------------------------------------------|------------------------|-------|
| Instruksjoner til intervjueren                                                                                                       |                  | [Spurt hvis u=1. ]                                                                 |                        |       |
| Verdi                                                                                                                                | Merkelapp        | Enheter                                                                            | Prosent                |       |
| 1                                                                                                                                    | Ja               | 154                                                                                | <div><div></div></div> | 3.3%  |
| 2                                                                                                                                    | Nei              | 1004                                                                               | <div><div></div></div> | 21.4% |
| 97                                                                                                                                   | Ikke svart       | 26                                                                                 | <div><div></div></div> | 0.6%  |
| 98                                                                                                                                   | Ikke spurt       | 3505                                                                               | <div><div></div></div> | 74.7% |
| Advarsel: disse tallene indikerer antall enheter (cases) i datafilen. De kan ikke tolkes som oppsummert statistikk for populasjonen. |                  |                                                                                    |                        |       |
| # r7fri4e: Deltatt som frivillig ved en søk og redningsaksjon                                                                        |                  |                                                                                    |                        |       |
| Informasjon                                                                                                                          |                  | [Type= diskret] [Format=numeric] [Rekkevidde= 1-3] [Missing=*]                     |                        |       |
| Statistikk [NW/ W]                                                                                                                   |                  | [Gyldige=4689 /-] [Ugyldig=0 /-]                                                   |                        |       |
| Spørsmålstekst                                                                                                                       |                  | Har du deltatt som frivillig ved en søk og redningsaksjon?                         |                        |       |
| Instruksjoner til intervjueren                                                                                                       |                  | [Spurt hvis u=1. ]                                                                 |                        |       |
| Verdi                                                                                                                                | Merkelapp        | Enheter                                                                            | Prosent                |       |
| 1                                                                                                                                    | Ja, flere ganger | 58                                                                                 | <div><div></div></div> | 1.2%  |
| 2                                                                                                                                    | Ja, en gang      | 102                                                                                | <div><div></div></div> | 2.2%  |
| 3                                                                                                                                    | Nei              | 997                                                                                | <div><div></div></div> | 21.3% |
| 97                                                                                                                                   | Ikke svart       | 27                                                                                 | <div><div></div></div> | 0.6%  |
| 98                                                                                                                                   | Ikke spurt       | 3505                                                                               | <div><div></div></div> | 74.7% |
| Advarsel: disse tallene indikerer antall enheter (cases) i datafilen. De kan ikke tolkes som oppsummert statistikk for populasjonen. |                  |                                                                                    |                        |       |
| # r7fri4f: Bistått politi/frivillige organisasjoner som frivillig ved en ulykke                                                      |                  |                                                                                    |                        |       |
| Informasjon                                                                                                                          |                  | [Type= diskret] [Format=numeric] [Rekkevidde= 1-3] [Missing=*]                     |                        |       |
| Statistikk [NW/ W]                                                                                                                   |                  | [Gyldige=4689 /-] [Ugyldig=0 /-]                                                   |                        |       |
| Spørsmålstekst                                                                                                                       |                  | Har du som frivillig bistått politi eller frivillige organisasjoner ved en ulykke? |                        |       |
| Instruksjoner til intervjueren                                                                                                       |                  | [Spurt hvis u=1. ]                                                                 |                        |       |
| Kommentarer                                                                                                                          |                  | Har du som frivillig bistått politi eller frivillige organisasjoner ved en ulykke? |                        |       |
| Verdi                                                                                                                                | Merkelapp        | Enheter                                                                            | Prosent                |       |
| 1                                                                                                                                    | Ja, flere ganger | 61                                                                                 | <div><div></div></div> | 1.3%  |
| 2                                                                                                                                    | Ja, en gang      | 118                                                                                | <div><div></div></div> | 2.5%  |
| 3                                                                                                                                    | Nei              | 962                                                                                | <div><div></div></div> | 20.5% |
| 97                                                                                                                                   | Ikke svart       | 43                                                                                 | <div><div></div></div> | 0.9%  |
| 98                                                                                                                                   | Ikke spurt       | 3505                                                                               | <div><div></div></div> | 74.7% |
| Advarsel: disse tallene indikerer antall enheter (cases) i datafilen. De kan ikke tolkes som oppsummert statistikk for populasjonen. |                  |                                                                                    |                        |       |
| # r7ran38: [Randomiserer hvis u=1 og R7FRI4d=2. ]                                                                                    |                  |                                                                                    |                        |       |
| Informasjon                                                                                                                          |                  | [Type= diskret] [Format=numeric] [Rekkevidde= 1-2] [Missing=*]                     |                        |       |
| Statistikk [NW/ W]                                                                                                                   |                  | [Gyldige=1004 /-] [Ugyldig=3685 /-]                                                |                        |       |
| Instruksjoner til intervjueren                                                                                                       |                  | [Randomiserer hvis u=1 og R7FRI4d=2. ]                                             |                        |       |
| Verdi                                                                                                                                | Merkelapp        | Enheter                                                                            | Prosent                |       |
| 1                                                                                                                                    | 1                | 503                                                                                | <div><div></div></div> | 50.1% |
| 2                                                                                                                                    | 2                | 501                                                                                | <div><div></div></div> | 49.9% |
| Sysmiss                                                                                                                              |                  | 3685                                                                               |                        |       |

|                                                                                                                                       |                                                                                                                                                                                                  |         |         |
|---------------------------------------------------------------------------------------------------------------------------------------|--------------------------------------------------------------------------------------------------------------------------------------------------------------------------------------------------|---------|---------|
| # r7ran38: [Randomiserer hvis u=1 og R7FRI4d=2. ]                                                                                     |                                                                                                                                                                                                  |         |         |
| Advarsel: disse tallene indikerer antall enheter (cases) i datafilen. De kan ikke tolkes som oppsummert statistikk for populasjonen.  |                                                                                                                                                                                                  |         |         |
| # r7fri4g: Kunne du tenke deg å bli medlem i en slik organisasjon? (Medlemmer må gjennomføre kurs og være klar ved øyeblikks varsel). |                                                                                                                                                                                                  |         |         |
| Informasjon                                                                                                                           | [Type= diskret] [Format=numeric] [Rekkevidde= 1-3] [Missing=*]                                                                                                                                   |         |         |
| Statistikk [NW/ W]                                                                                                                    | [Gyldige=4689 /-] [Ugyldig=0 /-]                                                                                                                                                                 |         |         |
| Tekst før spørsmål                                                                                                                    | Medlemmer i beredskapsorganisasjoner må gjennomføre flere ulike kurs innenfor områder som førstehjelp, navigasjon, samband og teigsøk. De må også være klar til å delta ved et øyeblikks varsel. |         |         |
| Spørsmålstekst                                                                                                                        | Kunne du tenke deg å bli medlem i en slik organisasjon?                                                                                                                                          |         |         |
| Instruksjoner til intervjueren                                                                                                        | [Spurt hvis u=1 og ran38=1. ]                                                                                                                                                                    |         |         |
| Kommentarer                                                                                                                           | Medlemmer i beredskapsorganisasjoner må gjennomføre flere ulike kurs innenfor områder som førstehjelp, navigasjon, sa                                                                            |         |         |
| Verdi                                                                                                                                 | Merkelapp                                                                                                                                                                                        | Enheter | Prosent |
| 1                                                                                                                                     | Ja                                                                                                                                                                                               | 112     | 2.4%    |
| 2                                                                                                                                     | Nei                                                                                                                                                                                              | 177     | 3.8%    |
| 3                                                                                                                                     | Vet ikke                                                                                                                                                                                         | 211     | 4.5%    |
| 97                                                                                                                                    | Ikke svart                                                                                                                                                                                       | 3       | 0.1%    |
| 98                                                                                                                                    | Ikke spurt                                                                                                                                                                                       | 4186    | 89.3%   |
| Advarsel: disse tallene indikerer antall enheter (cases) i datafilen. De kan ikke tolkes som oppsummert statistikk for populasjonen.  |                                                                                                                                                                                                  |         |         |
| # r7fri4g1: Hvis nei, hvorfor ikke? [anonymisert]                                                                                     |                                                                                                                                                                                                  |         |         |
| Informasjon                                                                                                                           | [Type= diskret] [Format=character] [Missing=*]                                                                                                                                                   |         |         |
| Statistikk [NW/ W]                                                                                                                    | [Gyldige=4689 /-] [Ugyldig=0 /-]                                                                                                                                                                 |         |         |
| Spørsmålstekst                                                                                                                        | Hvis nei, hvorfor ikke?                                                                                                                                                                          |         |         |
| Instruksjoner til intervjueren                                                                                                        | [Spurt hvis u=1 og ran38=1 og R7FRI4g=2. ]<br>[Data tilbakeholdt av hensyn til anonymitet]                                                                                                       |         |         |
| Verdi                                                                                                                                 | Merkelapp                                                                                                                                                                                        | Enheter | Prosent |
|                                                                                                                                       |                                                                                                                                                                                                  | 4689    | 100.0%  |
| Advarsel: disse tallene indikerer antall enheter (cases) i datafilen. De kan ikke tolkes som oppsummert statistikk for populasjonen.  |                                                                                                                                                                                                  |         |         |
| # r7fri4h: Kunne du tenke deg å bli medlem i en beredskapsorganisasjon?                                                               |                                                                                                                                                                                                  |         |         |
| Informasjon                                                                                                                           | [Type= diskret] [Format=numeric] [Rekkevidde= 1-3] [Missing=*]                                                                                                                                   |         |         |
| Statistikk [NW/ W]                                                                                                                    | [Gyldige=4689 /-] [Ugyldig=0 /-]                                                                                                                                                                 |         |         |
| Spørsmålstekst                                                                                                                        | Kunne du tenke deg å bli medlem i en beredskapsorganisasjon?                                                                                                                                     |         |         |
| Instruksjoner til intervjueren                                                                                                        | [Spurt hvis u=1 og ran38=2. ]                                                                                                                                                                    |         |         |
| Verdi                                                                                                                                 | Merkelapp                                                                                                                                                                                        | Enheter | Prosent |
| 1                                                                                                                                     | Ja                                                                                                                                                                                               | 90      | 1.9%    |
| 2                                                                                                                                     | Nei                                                                                                                                                                                              | 135     | 2.9%    |
| 3                                                                                                                                     | Vet ikke                                                                                                                                                                                         | 271     | 5.8%    |
| 97                                                                                                                                    | Ikke svart                                                                                                                                                                                       | 5       | 0.1%    |
| 98                                                                                                                                    | Ikke spurt                                                                                                                                                                                       | 4188    | 89.3%   |
| Advarsel: disse tallene indikerer antall enheter (cases) i datafilen. De kan ikke tolkes som oppsummert statistikk for populasjonen.  |                                                                                                                                                                                                  |         |         |
| # r7fri4h1: Hvis nei, hvorfor ikke? [anonymisert]                                                                                     |                                                                                                                                                                                                  |         |         |
| Informasjon                                                                                                                           | [Type= diskret] [Format=character] [Missing=*]                                                                                                                                                   |         |         |
| Statistikk [NW/ W]                                                                                                                    | [Gyldige=4689 /-] [Ugyldig=0 /-]                                                                                                                                                                 |         |         |

| # r7fri4h1: Hvis nei, hvorfor ikke? [anonymisert]                                                                                    |                                                                                                                                                       |         |                    |
|--------------------------------------------------------------------------------------------------------------------------------------|-------------------------------------------------------------------------------------------------------------------------------------------------------|---------|--------------------|
| Spørsmålstekst                                                                                                                       | Hvis nei, hvorfor ikke?                                                                                                                               |         |                    |
| Instruksjoner til intervjueren                                                                                                       | [Spurt hvis u=1 og ran38=2 og R7FRI4h=2. ]<br>[Data tilbakeholdt av hensyn til anonymitet]                                                            |         |                    |
| Verdi                                                                                                                                | Merkelapp                                                                                                                                             | Enheter | Prosent            |
|                                                                                                                                      |                                                                                                                                                       | 4689    | <div></div> 100.0% |
| Advarsel: disse tallene indikerer antall enheter (cases) i datafilen. De kan ikke tolkes som oppsummert statistikk for populasjonen. |                                                                                                                                                       |         |                    |
| # r7fri4i: Sannsynlighet for å bistå ved søk og redningsoppdrag: Spurt av politiet                                                   |                                                                                                                                                       |         |                    |
| Informasjon                                                                                                                          | [Type= diskret] [Format=numeric] [Rekkevidde= 1-5] [Missing=*]                                                                                        |         |                    |
| Statistikk [NW/ W]                                                                                                                   | [Gyldige=4689 /-] [Ugyldig=0 /-]                                                                                                                      |         |                    |
| Spørsmålstekst                                                                                                                       | Dersom du ble spurt av politiet om å bistå ved et søk og redningsoppdrag, hvor sannsynlig er det at du ville deltatt?                                 |         |                    |
| Instruksjoner til intervjueren                                                                                                       | [Spurt hvis u=1. ]                                                                                                                                    |         |                    |
| Kommentarer                                                                                                                          | Dersom du ble spurt av politiet om å bistå ved et søk og redningsoppdrag, hvor sannsynlig er det at du ville deltatt?                                 |         |                    |
| Verdi                                                                                                                                | Merkelapp                                                                                                                                             | Enheter | Prosent            |
| 1                                                                                                                                    | Svært sannsynlig                                                                                                                                      | 597     | <div></div> 12.7%  |
| 2                                                                                                                                    | Nokså sannsynlig                                                                                                                                      | 400     | <div></div> 8.5%   |
| 3                                                                                                                                    | Verken eller                                                                                                                                          | 73      | <div></div> 1.6%   |
| 4                                                                                                                                    | Nokså usannsynlig                                                                                                                                     | 54      | <div></div> 1.2%   |
| 5                                                                                                                                    | Svært usannsynlig                                                                                                                                     | 39      | <div></div> 0.8%   |
| 97                                                                                                                                   | Ikke svart                                                                                                                                            | 21      | <div></div> 0.4%   |
| 98                                                                                                                                   | Ikke spurt                                                                                                                                            | 3505    | <div></div> 74.7%  |
| Advarsel: disse tallene indikerer antall enheter (cases) i datafilen. De kan ikke tolkes som oppsummert statistikk for populasjonen. |                                                                                                                                                       |         |                    |
| # r7fri4j: Sannsynlighet for å bistå ved søk og redningsoppdrag: Bedt av frivillig organisasjon                                      |                                                                                                                                                       |         |                    |
| Informasjon                                                                                                                          | [Type= diskret] [Format=numeric] [Rekkevidde= 1-5] [Missing=*]                                                                                        |         |                    |
| Statistikk [NW/ W]                                                                                                                   | [Gyldige=4689 /-] [Ugyldig=0 /-]                                                                                                                      |         |                    |
| Spørsmålstekst                                                                                                                       | Dersom du ble bedt av en frivillig organisasjon om å bistå ved et søk og redningsoppdrag, hvor sannsynlig er det at du ville deltatt?                 |         |                    |
| Instruksjoner til intervjueren                                                                                                       | [Spurt hvis u=1. ]                                                                                                                                    |         |                    |
| Kommentarer                                                                                                                          | Dersom du ble bedt av en frivillig organisasjon om å bistå ved et søk og redningsoppdrag, hvor sannsynlig er det at du                                |         |                    |
| Verdi                                                                                                                                | Merkelapp                                                                                                                                             | Enheter | Prosent            |
| 1                                                                                                                                    | Svært sannsynlig                                                                                                                                      | 425     | <div></div> 9.1%   |
| 2                                                                                                                                    | Nokså sannsynlig                                                                                                                                      | 475     | <div></div> 10.1%  |
| 3                                                                                                                                    | Verken eller                                                                                                                                          | 145     | <div></div> 3.1%   |
| 4                                                                                                                                    | Nokså usannsynlig                                                                                                                                     | 61      | <div></div> 1.3%   |
| 5                                                                                                                                    | Svært usannsynlig                                                                                                                                     | 41      | <div></div> 0.9%   |
| 97                                                                                                                                   | Ikke svart                                                                                                                                            | 37      | <div></div> 0.8%   |
| 98                                                                                                                                   | Ikke spurt                                                                                                                                            | 3505    | <div></div> 74.7%  |
| Advarsel: disse tallene indikerer antall enheter (cases) i datafilen. De kan ikke tolkes som oppsummert statistikk for populasjonen. |                                                                                                                                                       |         |                    |
| # r7fri4k: Sannsynlighet for å bistå ved søk og redningsoppdrag: Bedt av familie/omgangskrets                                        |                                                                                                                                                       |         |                    |
| Informasjon                                                                                                                          | [Type= diskret] [Format=numeric] [Rekkevidde= 1-5] [Missing=*]                                                                                        |         |                    |
| Statistikk [NW/ W]                                                                                                                   | [Gyldige=4689 /-] [Ugyldig=0 /-]                                                                                                                      |         |                    |
| Spørsmålstekst                                                                                                                       | Dersom du ble bedt av familien din eller andre i din omgangskrets om å delta i et søk og redningsoppdrag, hvor sannsynlig er det at du ville deltatt? |         |                    |

| # r7fri4k: Sannsynlighet for å bistå ved søk og redningsoppdrag: Bedt av familie/omgangskrets                                        |                                                                                                                                           |         |             |       |
|--------------------------------------------------------------------------------------------------------------------------------------|-------------------------------------------------------------------------------------------------------------------------------------------|---------|-------------|-------|
| Instruksjoner til intervjueren                                                                                                       | [Spurt hvis u=1. ]                                                                                                                        |         |             |       |
| Kommentarer                                                                                                                          | Dersom du ble bedt av familien din eller andre i din omgangskrets om å delta i et søk og redningsoppdrag, hvor sannsynl                   |         |             |       |
| Verdi                                                                                                                                | Merkelapp                                                                                                                                 | Enheter | Prosent     |       |
| 1                                                                                                                                    | Svært sannsynlig                                                                                                                          | 851     | <div></div> | 18.1% |
| 2                                                                                                                                    | Nokså sannsynlig                                                                                                                          | 241     | <div></div> | 5.1%  |
| 3                                                                                                                                    | Verken eller                                                                                                                              | 21      | <div></div> | 0.4%  |
| 4                                                                                                                                    | Nokså usannsynlig                                                                                                                         | 22      | <div></div> | 0.5%  |
| 5                                                                                                                                    | Svært usannsynlig                                                                                                                         | 16      | <div></div> | 0.3%  |
| 97                                                                                                                                   | Ikke svart                                                                                                                                | 33      | <div></div> | 0.7%  |
| 98                                                                                                                                   | Ikke spurt                                                                                                                                | 3505    | <div></div> | 74.7% |
| Advarsel: disse tallene indikerer antall enheter (cases) i datafilen. De kan ikke tolkes som oppsummert statistikk for populasjonen. |                                                                                                                                           |         |             |       |
| # r7fri4l_1: Påstand: Frivillige organisasjoners rolle i beredskapsarbeid lite synlig i media                                        |                                                                                                                                           |         |             |       |
| Informasjon                                                                                                                          | [Type= diskret] [Format=numeric] [Rekkevidde= 1-5] [Missing=*]                                                                            |         |             |       |
| Statistikk [NW/ W]                                                                                                                   | [Gyldige=4689 /-] [Ugyldig=0 /-]                                                                                                          |         |             |       |
| Tekst før spørsmål                                                                                                                   | Hvor enig eller uenig er du i følgende påstander:                                                                                         |         |             |       |
| Spørsmålstekst                                                                                                                       | De frivillige organisasjonenes rolle i beredskapsarbeidet er lite synlig i media.                                                         |         |             |       |
| Instruksjoner til intervjueren                                                                                                       | [Spurt hvis u=1. ]                                                                                                                        |         |             |       |
| Kommentarer                                                                                                                          | De frivillige organisasjonenes rolle i beredskapsarbeidet er lite synlig i media. (Hvor enig eller uenig er du i følgend                  |         |             |       |
| Verdi                                                                                                                                | Merkelapp                                                                                                                                 | Enheter | Prosent     |       |
| 1                                                                                                                                    | Helt enig                                                                                                                                 | 117     | <div></div> | 2.5%  |
| 2                                                                                                                                    | Nokså enig                                                                                                                                | 429     | <div></div> | 9.1%  |
| 3                                                                                                                                    | Verken enig eller uenig                                                                                                                   | 305     | <div></div> | 6.5%  |
| 4                                                                                                                                    | Nokså uenig                                                                                                                               | 268     | <div></div> | 5.7%  |
| 5                                                                                                                                    | Helt uenig                                                                                                                                | 39      | <div></div> | 0.8%  |
| 97                                                                                                                                   | Ikke svart                                                                                                                                | 26      | <div></div> | 0.6%  |
| 98                                                                                                                                   | Ikke spurt                                                                                                                                | 3505    | <div></div> | 74.7% |
| Advarsel: disse tallene indikerer antall enheter (cases) i datafilen. De kan ikke tolkes som oppsummert statistikk for populasjonen. |                                                                                                                                           |         |             |       |
| # r7fri4l_2: Påstand: Viktig for min deltakelse i redningsarbeid at jeg kjenner medlemmer av organisasjonen personlig                |                                                                                                                                           |         |             |       |
| Informasjon                                                                                                                          | [Type= diskret] [Format=numeric] [Rekkevidde= 1-5] [Missing=*]                                                                            |         |             |       |
| Statistikk [NW/ W]                                                                                                                   | [Gyldige=4689 /-] [Ugyldig=0 /-]                                                                                                          |         |             |       |
| Tekst før spørsmål                                                                                                                   | Hvor enig eller uenig er du i følgende påstander:                                                                                         |         |             |       |
| Spørsmålstekst                                                                                                                       | Hvis jeg skal delta som frivillig i redningsarbeid er det viktig at jeg kjenner ledere eller andre medlemmer av organisasjonen personlig. |         |             |       |
| Instruksjoner til intervjueren                                                                                                       | [Spurt hvis u=1. ]                                                                                                                        |         |             |       |
| Kommentarer                                                                                                                          | Hvis jeg skal delta som frivillig i redningsarbeid er det viktig at jeg kjenner ledere eller andre medlemmer av organisas                 |         |             |       |
| Verdi                                                                                                                                | Merkelapp                                                                                                                                 | Enheter | Prosent     |       |
| 1                                                                                                                                    | Helt enig                                                                                                                                 | 41      | <div></div> | 0.9%  |
| 2                                                                                                                                    | Nokså enig                                                                                                                                | 224     | <div></div> | 4.8%  |
| 3                                                                                                                                    | Verken enig eller uenig                                                                                                                   | 400     | <div></div> | 8.5%  |
| 4                                                                                                                                    | Nokså uenig                                                                                                                               | 324     | <div></div> | 6.9%  |

# r7fri4l\_2: Påstand: Viktig for min deltakelse i redningsarbeid at jeg kjenner medlemmer av organisasjonen personlig

| Verdi | Merkelapp  | Enheter | Prosent           |
|-------|------------|---------|-------------------|
| 5     | Helt uenig | 164     | <div></div> 3.5%  |
| 97    | Ikke svart | 31      | <div></div> 0.7%  |
| 98    | Ikke spurt | 3505    | <div></div> 74.7% |

Advarsel: disse tallene indikerer antall enheter (cases) i datafilen. De kan ikke tolkes som oppsummert statistikk for populasjonen.

# r7fri4l\_3: Påstand: Beredskapsarbeid bør være offentlig ansvar forbeholdt offentlige institusjoner

|                                |                                                                                                                        |
|--------------------------------|------------------------------------------------------------------------------------------------------------------------|
| Informasjon                    | [Type= diskret] [Format=numeric] [Rekkevidde= 1-5] [Missing=*]                                                         |
| Statistikk [NW/ W]             | [Gyldige=4689 /-] [Ugyldig=0 /-]                                                                                       |
| Tekst før spørsmål             | Hvor enig eller uenig er du i følgende påstander:                                                                      |
| Spørsmålstekst                 | Beredskapsarbeid bør være et offentlig ansvar forbeholdt offentlige institusjoner.                                     |
| Instruksjoner til intervjueren | [Spurt hvis u=1. ]                                                                                                     |
| Kommentarer                    | Beredskapsarbeid bør være et offentlig ansvar forbeholdt offentlige institusjoner. (Hvor enig eller uenig er du i følg |

| Verdi | Merkelapp               | Enheter | Prosent           |
|-------|-------------------------|---------|-------------------|
| 1     | Helt enig               | 64      | <div></div> 1.4%  |
| 2     | Nokså enig              | 189     | <div></div> 4.0%  |
| 3     | Verken enig eller uenig | 424     | <div></div> 9.0%  |
| 4     | Nokså uenig             | 376     | <div></div> 8.0%  |
| 5     | Helt uenig              | 102     | <div></div> 2.2%  |
| 97    | Ikke svart              | 29      | <div></div> 0.6%  |
| 98    | Ikke spurt              | 3505    | <div></div> 74.7% |

Advarsel: disse tallene indikerer antall enheter (cases) i datafilen. De kan ikke tolkes som oppsummert statistikk for populasjonen.

# r7fri4l\_4: Påstand: Frivillige organisasjoner bør ha viktig rolle i beredskapsarbeid

|                                |                                                                                                                        |
|--------------------------------|------------------------------------------------------------------------------------------------------------------------|
| Informasjon                    | [Type= diskret] [Format=numeric] [Rekkevidde= 1-5] [Missing=*]                                                         |
| Statistikk [NW/ W]             | [Gyldige=4689 /-] [Ugyldig=0 /-]                                                                                       |
| Tekst før spørsmål             | Hvor enig eller uenig er du i følgende påstander:                                                                      |
| Spørsmålstekst                 | Frivillige organisasjoner bør ha en viktig rolle i beredskapsarbeidet i Norge.                                         |
| Instruksjoner til intervjueren | [Spurt hvis u=1. ]                                                                                                     |
| Kommentarer                    | Frivillige organisasjoner bør ha en viktig rolle i beredskapsarbeidet i Norge. (Hvor enig eller uenig er du i følgende |

| Verdi | Merkelapp               | Enheter | Prosent           |
|-------|-------------------------|---------|-------------------|
| 1     | Helt enig               | 251     | <div></div> 5.4%  |
| 2     | Nokså enig              | 569     | <div></div> 12.1% |
| 3     | Verken enig eller uenig | 270     | <div></div> 5.8%  |
| 4     | Nokså uenig             | 50      | <div></div> 1.1%  |
| 5     | Helt uenig              | 14      | <div></div> 0.3%  |
| 97    | Ikke svart              | 30      | <div></div> 0.6%  |
| 98    | Ikke spurt              | 3505    | <div></div> 74.7% |

Advarsel: disse tallene indikerer antall enheter (cases) i datafilen. De kan ikke tolkes som oppsummert statistikk for populasjonen.

# r7fri4l\_5: Påstand: Avgjørende for min deltakelse i redningsarbeid å få fri med lønn av arbeidsgiver under oppdrag

|                    |                                                                |
|--------------------|----------------------------------------------------------------|
| Informasjon        | [Type= diskret] [Format=numeric] [Rekkevidde= 1-5] [Missing=*] |
| Statistikk [NW/ W] | [Gyldige=4689 /-] [Ugyldig=0 /-]                               |
| Tekst før spørsmål | Hvor enig eller uenig er du i følgende påstander:              |

| # r7fri4l_5: Påstand: Avgjørende for min deltakelse i redningsarbeid å få fri med lønn av arbeidsgiver under oppdrag                 |                                                                                                                         |         |                              |
|--------------------------------------------------------------------------------------------------------------------------------------|-------------------------------------------------------------------------------------------------------------------------|---------|------------------------------|
| Spørsmålstekst                                                                                                                       | Hvis jeg skal delta i frivillig redningsarbeid er det avgjørende at arbeidsgiver gir meg fri med lønn under oppdrag.    |         |                              |
| Instruksjoner til intervjueren                                                                                                       | [Spurt hvis u=1. ]                                                                                                      |         |                              |
| Kommentarer                                                                                                                          | Hvis jeg skal delta i frivillig redningsarbeid er det avgjørende at arbeidsgiver gir meg fri med lønn under oppdrag. (H |         |                              |
| Verdi                                                                                                                                | Merkelapp                                                                                                               | Enheter | Prosent                      |
| 1                                                                                                                                    | Helt enig                                                                                                               | 177     | <div><div></div></div> 3.8%  |
| 2                                                                                                                                    | Nokså enig                                                                                                              | 285     | <div><div></div></div> 6.1%  |
| 3                                                                                                                                    | Verken enig eller uenig                                                                                                 | 417     | <div><div></div></div> 8.9%  |
| 4                                                                                                                                    | Nokså uenig                                                                                                             | 146     | <div><div></div></div> 3.1%  |
| 5                                                                                                                                    | Helt uenig                                                                                                              | 113     | <div><div></div></div> 2.4%  |
| 97                                                                                                                                   | Ikke svart                                                                                                              | 46      | <div><div></div></div> 1.0%  |
| 98                                                                                                                                   | Ikke spurt                                                                                                              | 3505    | <div><div></div></div> 74.7% |
| Advarsel: disse tallene indikerer antall enheter (cases) i datafilen. De kan ikke tolkes som oppsummert statistikk for populasjonen. |                                                                                                                         |         |                              |
| # r7fri11: Hvor god er helsen din?                                                                                                   |                                                                                                                         |         |                              |
| Informasjon                                                                                                                          | [Type= diskret] [Format=numeric] [Rekkevidde= 1-4] [Missing=*]                                                          |         |                              |
| Statistikk [NW/ W]                                                                                                                   | [Gyldige=4689 /-] [Ugyldig=0 /-]                                                                                        |         |                              |
| Spørsmålstekst                                                                                                                       | Generelt sett, hvor god er helsen din?                                                                                  |         |                              |
| Instruksjoner til intervjueren                                                                                                       | [Spurt hvis u=1. ]                                                                                                      |         |                              |
| Verdi                                                                                                                                | Merkelapp                                                                                                               | Enheter | Prosent                      |
| 1                                                                                                                                    | Veldig god                                                                                                              | 322     | <div><div></div></div> 6.9%  |
| 2                                                                                                                                    | God                                                                                                                     | 673     | <div><div></div></div> 14.4% |
| 3                                                                                                                                    | Ikke så god                                                                                                             | 152     | <div><div></div></div> 3.2%  |
| 4                                                                                                                                    | Dårlig                                                                                                                  | 15      | <div><div></div></div> 0.3%  |
| 97                                                                                                                                   | Ikke svart                                                                                                              | 22      | <div><div></div></div> 0.5%  |
| 98                                                                                                                                   | Ikke spurt                                                                                                              | 3505    | <div><div></div></div> 74.7% |
| Advarsel: disse tallene indikerer antall enheter (cases) i datafilen. De kan ikke tolkes som oppsummert statistikk for populasjonen. |                                                                                                                         |         |                              |
| # r7fri12: Har du helseproblem forventet å vedvare minst seks måneder?                                                               |                                                                                                                         |         |                              |
| Informasjon                                                                                                                          | [Type= diskret] [Format=numeric] [Rekkevidde= 1-3] [Missing=*]                                                          |         |                              |
| Statistikk [NW/ W]                                                                                                                   | [Gyldige=4689 /-] [Ugyldig=0 /-]                                                                                        |         |                              |
| Spørsmålstekst                                                                                                                       | Har du noen former for kronisk sykdom eller helseproblem som er forventet å vedvare minst seks måneder eller lengre?    |         |                              |
| Instruksjoner til intervjueren                                                                                                       | [Spurt hvis u=1. ]                                                                                                      |         |                              |
| Kommentarer                                                                                                                          | Har du noen former for kronisk sykdom eller helseproblem som er forventet å vedvare minst seks måneder eller lengre?    |         |                              |
| Verdi                                                                                                                                | Merkelapp                                                                                                               | Enheter | Prosent                      |
| 1                                                                                                                                    | Ja                                                                                                                      | 488     | <div><div></div></div> 10.4% |
| 2                                                                                                                                    | Nei                                                                                                                     | 617     | <div><div></div></div> 13.2% |
| 3                                                                                                                                    | Ønsker ikke å svare                                                                                                     | 49      | <div><div></div></div> 1.0%  |
| 97                                                                                                                                   | Ikke svart                                                                                                              | 30      | <div><div></div></div> 0.6%  |
| 98                                                                                                                                   | Ikke spurt                                                                                                              | 3505    | <div><div></div></div> 74.7% |
| Advarsel: disse tallene indikerer antall enheter (cases) i datafilen. De kan ikke tolkes som oppsummert statistikk for populasjonen. |                                                                                                                         |         |                              |
| # r7fri13: Har, grunnet helseproblemer, vært hindret fra utføring av vanlige aktiviteter i løpet av de seks siste månedene           |                                                                                                                         |         |                              |
| Informasjon                                                                                                                          | [Type= diskret] [Format=numeric] [Rekkevidde= 1-3] [Missing=*]                                                          |         |                              |

|                                                                                                                                      |                                                                                                                                     |                |                              |
|--------------------------------------------------------------------------------------------------------------------------------------|-------------------------------------------------------------------------------------------------------------------------------------|----------------|------------------------------|
| # r7fri13: Har, grunnet helseproblemer, vært hindret fra utføring av vanlige aktiviteter i løpet av de seks siste månedene           |                                                                                                                                     |                |                              |
| Statistikk [NW/ W]                                                                                                                   | [Gyldige=4689 /-] [Ugyldig=0 /-]                                                                                                    |                |                              |
| Spørsmålstekst                                                                                                                       | I løpet av de seks siste månedene, har du på grunn av helseproblemer vært hindret fra å utføre aktiviteter som folk vanligvis gjør? |                |                              |
| Instruksjoner til intervjueren                                                                                                       | [Spurt hvis u=1. ]                                                                                                                  |                |                              |
| Kommentarer                                                                                                                          | I løpet av de seks siste månedene, har du på grunn av helseproblemer vært hindret fra å utføre aktiviteter som folk                 |                |                              |
| <b>Verdi</b>                                                                                                                         | <b>Merkelapp</b>                                                                                                                    | <b>Enheter</b> | <b>Prosent</b>               |
| 1                                                                                                                                    | Ja, veldig hindret                                                                                                                  | 59             | <div><div></div></div> 1.3%  |
| 2                                                                                                                                    | Ja, hindret                                                                                                                         | 303            | <div><div></div></div> 6.5%  |
| 3                                                                                                                                    | Nei, ikke hindret                                                                                                                   | 797            | <div><div></div></div> 17.0% |
| 97                                                                                                                                   | Ikke svart                                                                                                                          | 25             | <div><div></div></div> 0.5%  |
| 98                                                                                                                                   | Ikke spurt                                                                                                                          | 3505           | <div><div></div></div> 74.7% |
| Advarsel: disse tallene indikerer antall enheter (cases) i datafilen. De kan ikke tolkes som oppsummert statistikk for populasjonen. |                                                                                                                                     |                |                              |
| # r7fri32: Grad av tilfredshet med livet nå om dagen                                                                                 |                                                                                                                                     |                |                              |
| Informasjon                                                                                                                          | [Type= diskret] [Format=numeric] [Rekkevidde= 1-5] [Missing=*]                                                                      |                |                              |
| Statistikk [NW/ W]                                                                                                                   | [Gyldige=4689 /-] [Ugyldig=0 /-]                                                                                                    |                |                              |
| Spørsmålstekst                                                                                                                       | I hvor stor grad er du tilfreds med livet nå om dagen?                                                                              |                |                              |
| Instruksjoner til intervjueren                                                                                                       | [Spurt hvis u=1. ]                                                                                                                  |                |                              |
| <b>Verdi</b>                                                                                                                         | <b>Merkelapp</b>                                                                                                                    | <b>Enheter</b> | <b>Prosent</b>               |
| 1                                                                                                                                    | I svært stor grad                                                                                                                   | 205            | <div><div></div></div> 4.4%  |
| 2                                                                                                                                    | I stor grad                                                                                                                         | 660            | <div><div></div></div> 14.1% |
| 3                                                                                                                                    | I noen grad                                                                                                                         | 260            | <div><div></div></div> 5.5%  |
| 4                                                                                                                                    | I liten grad                                                                                                                        | 31             | <div><div></div></div> 0.7%  |
| 5                                                                                                                                    | Ikke i det hele tatt                                                                                                                | 7              | <div><div></div></div> 0.1%  |
| 97                                                                                                                                   | Ikke svart                                                                                                                          | 21             | <div><div></div></div> 0.4%  |
| 98                                                                                                                                   | Ikke spurt                                                                                                                          | 3505           | <div><div></div></div> 74.7% |
| Advarsel: disse tallene indikerer antall enheter (cases) i datafilen. De kan ikke tolkes som oppsummert statistikk for populasjonen. |                                                                                                                                     |                |                              |
| # r7fri33: I hvor stor grad synes du det du gjør i livet er meningsfullt?                                                            |                                                                                                                                     |                |                              |
| Informasjon                                                                                                                          | [Type= diskret] [Format=numeric] [Rekkevidde= 1-5] [Missing=*]                                                                      |                |                              |
| Statistikk [NW/ W]                                                                                                                   | [Gyldige=4689 /-] [Ugyldig=0 /-]                                                                                                    |                |                              |
| Spørsmålstekst                                                                                                                       | Alt i alt, i hvor stor grad synes du det du gjør i livet er meningsfullt?                                                           |                |                              |
| Instruksjoner til intervjueren                                                                                                       | [Spurt hvis u=1. ]                                                                                                                  |                |                              |
| <b>Verdi</b>                                                                                                                         | <b>Merkelapp</b>                                                                                                                    | <b>Enheter</b> | <b>Prosent</b>               |
| 1                                                                                                                                    | I svært stor grad                                                                                                                   | 219            | <div><div></div></div> 4.7%  |
| 2                                                                                                                                    | I stor grad                                                                                                                         | 620            | <div><div></div></div> 13.2% |
| 3                                                                                                                                    | I noen grad                                                                                                                         | 263            | <div><div></div></div> 5.6%  |
| 4                                                                                                                                    | I liten grad                                                                                                                        | 46             | <div><div></div></div> 1.0%  |
| 5                                                                                                                                    | Ikke i det hele tatt                                                                                                                | 8              | <div><div></div></div> 0.2%  |
| 97                                                                                                                                   | Ikke svart                                                                                                                          | 28             | <div><div></div></div> 0.6%  |
| 98                                                                                                                                   | Ikke spurt                                                                                                                          | 3505           | <div><div></div></div> 74.7% |
| Advarsel: disse tallene indikerer antall enheter (cases) i datafilen. De kan ikke tolkes som oppsummert statistikk for populasjonen. |                                                                                                                                     |                |                              |

| # r7fri36_1: Hvor fornøyd med: Din levestandard                                                                                      |                                                                |         |             |       |
|--------------------------------------------------------------------------------------------------------------------------------------|----------------------------------------------------------------|---------|-------------|-------|
| Informasjon                                                                                                                          | [Type= diskret] [Format=numeric] [Rekkevidde= 1-7] [Missing=*] |         |             |       |
| Statistikk [NW/ W]                                                                                                                   | [Gyldige=4689 /-] [Ugyldig=0 /-]                               |         |             |       |
| Tekst før spørsmål                                                                                                                   | Hvor fornøyd er du med...                                      |         |             |       |
| Spørsmålstekst                                                                                                                       | Din levestandard                                               |         |             |       |
| Instruksjoner til intervjueren                                                                                                       | [Spurt hvis u=1. ]                                             |         |             |       |
| Verdi                                                                                                                                | Merkelapp                                                      | Enheter | Prosent     |       |
| 1                                                                                                                                    | Svært fornøyd                                                  | 335     | <div></div> | 7.1%  |
| 2                                                                                                                                    | Fornøyd                                                        | 659     | <div></div> | 14.1% |
| 3                                                                                                                                    | Noe fornøyd                                                    | 128     | <div></div> | 2.7%  |
| 4                                                                                                                                    | Lite fornøyd                                                   | 19      | <div></div> | 0.4%  |
| 5                                                                                                                                    | Ikke fornøyd                                                   | 14      | <div></div> | 0.3%  |
| 6                                                                                                                                    | Ikke fornøyd i det hele tatt                                   | 5       | <div></div> | 0.1%  |
| 97                                                                                                                                   | Ikke svart                                                     | 24      | <div></div> | 0.5%  |
| 98                                                                                                                                   | Ikke spurt                                                     | 3505    | <div></div> | 74.7% |
| Advarsel: disse tallene indikerer antall enheter (cases) i datafilen. De kan ikke tolkes som oppsummert statistikk for populasjonen. |                                                                |         |             |       |
| # r7fri36_2: Hvor fornøyd med: Din helse                                                                                             |                                                                |         |             |       |
| Informasjon                                                                                                                          | [Type= diskret] [Format=numeric] [Rekkevidde= 1-7] [Missing=*] |         |             |       |
| Statistikk [NW/ W]                                                                                                                   | [Gyldige=4689 /-] [Ugyldig=0 /-]                               |         |             |       |
| Tekst før spørsmål                                                                                                                   | Hvor fornøyd er du med...                                      |         |             |       |
| Spørsmålstekst                                                                                                                       | Din helse                                                      |         |             |       |
| Instruksjoner til intervjueren                                                                                                       | [Spurt hvis u=1. ]                                             |         |             |       |
| Verdi                                                                                                                                | Merkelapp                                                      | Enheter | Prosent     |       |
| 1                                                                                                                                    | Svært fornøyd                                                  | 212     | <div></div> | 4.5%  |
| 2                                                                                                                                    | Fornøyd                                                        | 572     | <div></div> | 12.2% |
| 3                                                                                                                                    | Noe fornøyd                                                    | 245     | <div></div> | 5.2%  |
| 4                                                                                                                                    | Lite fornøyd                                                   | 70      | <div></div> | 1.5%  |
| 5                                                                                                                                    | Ikke fornøyd                                                   | 35      | <div></div> | 0.7%  |
| 6                                                                                                                                    | Ikke fornøyd i det hele tatt                                   | 22      | <div></div> | 0.5%  |
| 97                                                                                                                                   | Ikke svart                                                     | 28      | <div></div> | 0.6%  |
| 98                                                                                                                                   | Ikke spurt                                                     | 3505    | <div></div> | 74.7% |
| Advarsel: disse tallene indikerer antall enheter (cases) i datafilen. De kan ikke tolkes som oppsummert statistikk for populasjonen. |                                                                |         |             |       |
| # r7fri36_3: Hvor fornøyd med: Det du oppnår i livet                                                                                 |                                                                |         |             |       |
| Informasjon                                                                                                                          | [Type= diskret] [Format=numeric] [Rekkevidde= 1-7] [Missing=*] |         |             |       |
| Statistikk [NW/ W]                                                                                                                   | [Gyldige=4689 /-] [Ugyldig=0 /-]                               |         |             |       |
| Tekst før spørsmål                                                                                                                   | Hvor fornøyd er du med...                                      |         |             |       |
| Spørsmålstekst                                                                                                                       | Det du oppnår i livet                                          |         |             |       |
| Instruksjoner til intervjueren                                                                                                       | [Spurt hvis u=1. ]                                             |         |             |       |
| Verdi                                                                                                                                | Merkelapp                                                      | Enheter | Prosent     |       |
| 1                                                                                                                                    | Svært fornøyd                                                  | 141     | <div></div> | 3.0%  |
| 2                                                                                                                                    | Fornøyd                                                        | 627     | <div></div> | 13.4% |
| 3                                                                                                                                    | Noe fornøyd                                                    | 284     | <div></div> | 6.1%  |



| # r7fri36_3: Hvor fornøyd med: Det du oppnår i livet                                                                                 |                                                                |         |                        |       |
|--------------------------------------------------------------------------------------------------------------------------------------|----------------------------------------------------------------|---------|------------------------|-------|
| Verdi                                                                                                                                | Merkelapp                                                      | Enheter | Prosent                |       |
| 4                                                                                                                                    | Lite fornøyd                                                   | 59      | <div><div></div></div> | 1.3%  |
| 5                                                                                                                                    | Ikke fornøyd                                                   | 26      | <div><div></div></div> | 0.6%  |
| 6                                                                                                                                    | Ikke fornøyd i det hele tatt                                   | 12      | <div><div></div></div> | 0.3%  |
| 97                                                                                                                                   | Ikke svart                                                     | 35      | <div><div></div></div> | 0.7%  |
| 98                                                                                                                                   | Ikke spurt                                                     | 3505    | <div><div></div></div> | 74.7% |
| Advarsel: disse tallene indikerer antall enheter (cases) i datafilen. De kan ikke tolkes som oppsummert statistikk for populasjonen. |                                                                |         |                        |       |
| # r7fri36_4: Hvor fornøyd med: Personlige relasjoner                                                                                 |                                                                |         |                        |       |
| Informasjon                                                                                                                          | [Type= diskret] [Format=numeric] [Rekkevidde= 1-7] [Missing=*] |         |                        |       |
| Statistikk [NW/ W]                                                                                                                   | [Gyldige=4689 /-] [Ugyldig=0 /-]                               |         |                        |       |
| Tekst før spørsmål                                                                                                                   | Hvor fornøyd er du med...                                      |         |                        |       |
| Spørsmålstekst                                                                                                                       | Dine personlige relasjoner                                     |         |                        |       |
| Instruksjoner til intervjueren                                                                                                       | [Spurt hvis u=1. ]                                             |         |                        |       |
| Verdi                                                                                                                                | Merkelapp                                                      | Enheter | Prosent                |       |
| 1                                                                                                                                    | Svært fornøyd                                                  | 221     | <div><div></div></div> | 4.7%  |
| 2                                                                                                                                    | Fornøyd                                                        | 624     | <div><div></div></div> | 13.3% |
| 3                                                                                                                                    | Noe fornøyd                                                    | 243     | <div><div></div></div> | 5.2%  |
| 4                                                                                                                                    | Lite fornøyd                                                   | 47      | <div><div></div></div> | 1.0%  |
| 5                                                                                                                                    | Ikke fornøyd                                                   | 15      | <div><div></div></div> | 0.3%  |
| 6                                                                                                                                    | Ikke fornøyd i det hele tatt                                   | 3       | <div><div></div></div> | 0.1%  |
| 97                                                                                                                                   | Ikke svart                                                     | 31      | <div><div></div></div> | 0.7%  |
| 98                                                                                                                                   | Ikke spurt                                                     | 3505    | <div><div></div></div> | 74.7% |
| Advarsel: disse tallene indikerer antall enheter (cases) i datafilen. De kan ikke tolkes som oppsummert statistikk for populasjonen. |                                                                |         |                        |       |
| # r7fri36_5: Hvor fornøyd med: Følelse av trygghet                                                                                   |                                                                |         |                        |       |
| Informasjon                                                                                                                          | [Type= diskret] [Format=numeric] [Rekkevidde= 1-7] [Missing=*] |         |                        |       |
| Statistikk [NW/ W]                                                                                                                   | [Gyldige=4689 /-] [Ugyldig=0 /-]                               |         |                        |       |
| Tekst før spørsmål                                                                                                                   | Hvor fornøyd er du med...                                      |         |                        |       |
| Spørsmålstekst                                                                                                                       | Hvor trygg du føler deg                                        |         |                        |       |
| Instruksjoner til intervjueren                                                                                                       | [Spurt hvis u=1. ]                                             |         |                        |       |
| Verdi                                                                                                                                | Merkelapp                                                      | Enheter | Prosent                |       |
| 1                                                                                                                                    | Svært fornøyd                                                  | 336     | <div><div></div></div> | 7.2%  |
| 2                                                                                                                                    | Fornøyd                                                        | 638     | <div><div></div></div> | 13.6% |
| 3                                                                                                                                    | Noe fornøyd                                                    | 135     | <div><div></div></div> | 2.9%  |
| 4                                                                                                                                    | Lite fornøyd                                                   | 26      | <div><div></div></div> | 0.6%  |
| 5                                                                                                                                    | Ikke fornøyd                                                   | 14      | <div><div></div></div> | 0.3%  |
| 6                                                                                                                                    | Ikke fornøyd i det hele tatt                                   | 8       | <div><div></div></div> | 0.2%  |
| 97                                                                                                                                   | Ikke svart                                                     | 27      | <div><div></div></div> | 0.6%  |
| 98                                                                                                                                   | Ikke spurt                                                     | 3505    | <div><div></div></div> | 74.7% |
| Advarsel: disse tallene indikerer antall enheter (cases) i datafilen. De kan ikke tolkes som oppsummert statistikk for populasjonen. |                                                                |         |                        |       |
| # r7fri36_6: Hvor fornøyd med: Følelsen av å være del av nabofellesskap                                                              |                                                                |         |                        |       |
| Informasjon                                                                                                                          | [Type= diskret] [Format=numeric] [Rekkevidde= 1-7] [Missing=*] |         |                        |       |
| Statistikk [NW/ W]                                                                                                                   | [Gyldige=4689 /-] [Ugyldig=0 /-]                               |         |                        |       |

| # r7fri36_6: Hvor fornøyd med: Følelsen av å være del av nabofellesskap                                                              |                              |                                                                                     |             |       |
|--------------------------------------------------------------------------------------------------------------------------------------|------------------------------|-------------------------------------------------------------------------------------|-------------|-------|
| Tekst før spørsmål                                                                                                                   |                              | Hvor fornøyd er du med...                                                           |             |       |
| Spørsmålstekst                                                                                                                       |                              | Følelsen av å være del av et nabofellesskap                                         |             |       |
| Instruksjoner til intervjueren                                                                                                       |                              | [Spurt hvis u=1. ]                                                                  |             |       |
| Verdi                                                                                                                                | Merkelapp                    | Enheter                                                                             | Prosent     |       |
| 1                                                                                                                                    | Svært fornøyd                | 111                                                                                 | <div></div> | 2.4%  |
| 2                                                                                                                                    | Fornøyd                      | 502                                                                                 | <div></div> | 10.7% |
| 3                                                                                                                                    | Noe fornøyd                  | 328                                                                                 | <div></div> | 7.0%  |
| 4                                                                                                                                    | Lite fornøyd                 | 122                                                                                 | <div></div> | 2.6%  |
| 5                                                                                                                                    | Ikke fornøyd                 | 33                                                                                  | <div></div> | 0.7%  |
| 6                                                                                                                                    | Ikke fornøyd i det hele tatt | 25                                                                                  | <div></div> | 0.5%  |
| 97                                                                                                                                   | Ikke svart                   | 63                                                                                  | <div></div> | 1.3%  |
| 98                                                                                                                                   | Ikke spurt                   | 3505                                                                                | <div></div> | 74.7% |
| Advarsel: disse tallene indikerer antall enheter (cases) i datafilen. De kan ikke tolkes som oppsummert statistikk for populasjonen. |                              |                                                                                     |             |       |
| # r7fri36_7: Hvor fornøyd med: Utsikt til fremtidig trygghet                                                                         |                              |                                                                                     |             |       |
| Informasjon                                                                                                                          |                              | [Type= diskret] [Format=numeric] [Rekkevidde= 1-7] [Missing=*]                      |             |       |
| Statistikk [NW/ W]                                                                                                                   |                              | [Gyldige=4689 /-] [Ugyldig=0 /-]                                                    |             |       |
| Tekst før spørsmål                                                                                                                   |                              | Hvor fornøyd er du med...                                                           |             |       |
| Spørsmålstekst                                                                                                                       |                              | Utsiktene til fremtidig trygghet                                                    |             |       |
| Instruksjoner til intervjueren                                                                                                       |                              | [Spurt hvis u=1. ]                                                                  |             |       |
| Verdi                                                                                                                                | Merkelapp                    | Enheter                                                                             | Prosent     |       |
| 1                                                                                                                                    | Svært fornøyd                | 159                                                                                 | <div></div> | 3.4%  |
| 2                                                                                                                                    | Fornøyd                      | 588                                                                                 | <div></div> | 12.5% |
| 3                                                                                                                                    | Noe fornøyd                  | 281                                                                                 | <div></div> | 6.0%  |
| 4                                                                                                                                    | Lite fornøyd                 | 72                                                                                  | <div></div> | 1.5%  |
| 5                                                                                                                                    | Ikke fornøyd                 | 31                                                                                  | <div></div> | 0.7%  |
| 6                                                                                                                                    | Ikke fornøyd i det hele tatt | 20                                                                                  | <div></div> | 0.4%  |
| 97                                                                                                                                   | Ikke svart                   | 33                                                                                  | <div></div> | 0.7%  |
| 98                                                                                                                                   | Ikke spurt                   | 3505                                                                                | <div></div> | 74.7% |
| Advarsel: disse tallene indikerer antall enheter (cases) i datafilen. De kan ikke tolkes som oppsummert statistikk for populasjonen. |                              |                                                                                     |             |       |
| # r7fri36_8: Hvor fornøyd med: Mengde tid til det du liker å gjøre                                                                   |                              |                                                                                     |             |       |
| Informasjon                                                                                                                          |                              | [Type= diskret] [Format=numeric] [Rekkevidde= 1-7] [Missing=*]                      |             |       |
| Statistikk [NW/ W]                                                                                                                   |                              | [Gyldige=4689 /-] [Ugyldig=0 /-]                                                    |             |       |
| Tekst før spørsmål                                                                                                                   |                              | Hvor fornøyd er du med...                                                           |             |       |
| Spørsmålstekst                                                                                                                       |                              | Mengden tid du har til å gjøre tingene du liker å gjøre                             |             |       |
| Instruksjoner til intervjueren                                                                                                       |                              | [Spurt hvis u=1. ]                                                                  |             |       |
| Kommentarer                                                                                                                          |                              | Mengden tid du har til å gjøre tingene du liker å gjøre (Hvor fornøyd er du med...) |             |       |
| Verdi                                                                                                                                | Merkelapp                    | Enheter                                                                             | Prosent     |       |
| 1                                                                                                                                    | Svært fornøyd                | 147                                                                                 | <div></div> | 3.1%  |
| 2                                                                                                                                    | Fornøyd                      | 502                                                                                 | <div></div> | 10.7% |
| 3                                                                                                                                    | Noe fornøyd                  | 297                                                                                 | <div></div> | 6.3%  |
| 4                                                                                                                                    | Lite fornøyd                 | 127                                                                                 | <div></div> | 2.7%  |

| # r7fri36_8: Hvor fornøyd med: Mengde tid til det du liker å gjøre                                                                   |                              |                                                                |             |       |
|--------------------------------------------------------------------------------------------------------------------------------------|------------------------------|----------------------------------------------------------------|-------------|-------|
| Verdi                                                                                                                                | Merkelapp                    | Enheter                                                        | Prosent     |       |
| 5                                                                                                                                    | Ikke fornøyd                 | 43                                                             | <div></div> | 0.9%  |
| 6                                                                                                                                    | Ikke fornøyd i det hele tatt | 38                                                             | <div></div> | 0.8%  |
| 97                                                                                                                                   | Ikke svart                   | 30                                                             | <div></div> | 0.6%  |
| 98                                                                                                                                   | Ikke spurt                   | 3505                                                           | <div></div> | 74.7% |
| Advarsel: disse tallene indikerer antall enheter (cases) i datafilen. De kan ikke tolkes som oppsummert statistikk for populasjonen. |                              |                                                                |             |       |
| # r7fri36_9: Hvor fornøyd med: Kvalitet på natur og miljø i nærområde                                                                |                              |                                                                |             |       |
| Informasjon                                                                                                                          |                              | [Type= diskret] [Format=numeric] [Rekkevidde= 1-7] [Missing=*] |             |       |
| Statistikk [NW/ W]                                                                                                                   |                              | [Gyldige=4689 /-] [Ugyldig=0 /-]                               |             |       |
| Tekst før spørsmål                                                                                                                   |                              | Hvor fornøyd er du med...                                      |             |       |
| Spørsmålstekst                                                                                                                       |                              | Kvaliteten på natur og miljø i ditt nærområde                  |             |       |
| Instruksjoner til intervjueren                                                                                                       |                              | [Spurt hvis u=1. ]                                             |             |       |
| Verdi                                                                                                                                | Merkelapp                    | Enheter                                                        | Prosent     |       |
| 1                                                                                                                                    | Svært fornøyd                | 454                                                            | <div></div> | 9.7%  |
| 2                                                                                                                                    | Fornøyd                      | 550                                                            | <div></div> | 11.7% |
| 3                                                                                                                                    | Noe fornøyd                  | 116                                                            | <div></div> | 2.5%  |
| 4                                                                                                                                    | Lite fornøyd                 | 25                                                             | <div></div> | 0.5%  |
| 5                                                                                                                                    | Ikke fornøyd                 | 9                                                              | <div></div> | 0.2%  |
| 6                                                                                                                                    | Ikke fornøyd i det hele tatt | 1                                                              | <div></div> | 0.0%  |
| 97                                                                                                                                   | Ikke svart                   | 29                                                             | <div></div> | 0.6%  |
| 98                                                                                                                                   | Ikke spurt                   | 3505                                                           | <div></div> | 74.7% |
| Advarsel: disse tallene indikerer antall enheter (cases) i datafilen. De kan ikke tolkes som oppsummert statistikk for populasjonen. |                              |                                                                |             |       |
| # r7fri36_10: Hvor fornøyd med: Jobben din                                                                                           |                              |                                                                |             |       |
| Informasjon                                                                                                                          |                              | [Type= diskret] [Format=numeric] [Rekkevidde= 1-7] [Missing=*] |             |       |
| Statistikk [NW/ W]                                                                                                                   |                              | [Gyldige=4689 /-] [Ugyldig=0 /-]                               |             |       |
| Tekst før spørsmål                                                                                                                   |                              | Hvor fornøyd er du med...                                      |             |       |
| Spørsmålstekst                                                                                                                       |                              | Jobben din                                                     |             |       |
| Instruksjoner til intervjueren                                                                                                       |                              | [Spurt hvis u=1. ]                                             |             |       |
| Verdi                                                                                                                                | Merkelapp                    | Enheter                                                        | Prosent     |       |
| 1                                                                                                                                    | Svært fornøyd                | 176                                                            | <div></div> | 3.8%  |
| 2                                                                                                                                    | Fornøyd                      | 429                                                            | <div></div> | 9.1%  |
| 3                                                                                                                                    | Noe fornøyd                  | 160                                                            | <div></div> | 3.4%  |
| 4                                                                                                                                    | Lite fornøyd                 | 40                                                             | <div></div> | 0.9%  |
| 5                                                                                                                                    | Ikke fornøyd                 | 22                                                             | <div></div> | 0.5%  |
| 6                                                                                                                                    | Ikke fornøyd i det hele tatt | 18                                                             | <div></div> | 0.4%  |
| 7                                                                                                                                    | Ikke relevant                | 300                                                            | <div></div> | 6.4%  |
| 97                                                                                                                                   | Ikke svart                   | 39                                                             | <div></div> | 0.8%  |
| 98                                                                                                                                   | Ikke spurt                   | 3505                                                           | <div></div> | 74.7% |
| Advarsel: disse tallene indikerer antall enheter (cases) i datafilen. De kan ikke tolkes som oppsummert statistikk for populasjonen. |                              |                                                                |             |       |
| # r7friend: Antall venner                                                                                                            |                              |                                                                |             |       |
| Informasjon                                                                                                                          |                              | [Type= diskret] [Format=numeric] [Rekkevidde= 1-5] [Missing=*] |             |       |
| Statistikk [NW/ W]                                                                                                                   |                              | [Gyldige=4689 /-] [Ugyldig=0 /-]                               |             |       |

| # r7friend: Antall venner                                                                                                            |                                                                                                                           |         |                   |
|--------------------------------------------------------------------------------------------------------------------------------------|---------------------------------------------------------------------------------------------------------------------------|---------|-------------------|
| Spørsmålstekst                                                                                                                       | Omtrent hvor mange venner har du for tiden?                                                                               |         |                   |
| Tekst etter spørsmål                                                                                                                 | Dette er mennesker du kan slappe av med, snakke med om private tema, eller spørre om hjelp.                               |         |                   |
| Instruksjoner til intervjueren                                                                                                       | [Spurt hvis u=1. ]                                                                                                        |         |                   |
| Kommentarer                                                                                                                          | Omtrent hvor mange venner har du for tiden? Dette er mennesker du kan slappe av med, snakke med om private tema, eller sp |         |                   |
| Verdi                                                                                                                                | Merkelapp                                                                                                                 | Enheter | Prosent           |
| 1                                                                                                                                    | Ingen                                                                                                                     | 19      | <div></div> 0.4%  |
| 2                                                                                                                                    | 1-2                                                                                                                       | 157     | <div></div> 3.3%  |
| 3                                                                                                                                    | 3-5                                                                                                                       | 409     | <div></div> 8.7%  |
| 4                                                                                                                                    | 6-10                                                                                                                      | 350     | <div></div> 7.5%  |
| 5                                                                                                                                    | Mer enn 10                                                                                                                | 224     | <div></div> 4.8%  |
| 97                                                                                                                                   | Ikke svart                                                                                                                | 25      | <div></div> 0.5%  |
| 98                                                                                                                                   | Ikke spurt                                                                                                                | 3505    | <div></div> 74.7% |
| Advarsel: disse tallene indikerer antall enheter (cases) i datafilen. De kan ikke tolkes som oppsummert statistikk for populasjonen. |                                                                                                                           |         |                   |
| # r7frnet_1: Er det noen i omgangskretsen som: Kan hjelpe deg å finne jobb                                                           |                                                                                                                           |         |                   |
| Informasjon                                                                                                                          | [Type= diskret] [Format=numeric] [Rekkevidde= 1-1] [Missing=*]                                                            |         |                   |
| Statistikk [NW/ W]                                                                                                                   | [Gyldige=4689 /-] [Ugyldig=0 /-]                                                                                          |         |                   |
| Tekst før spørsmål                                                                                                                   | Er det i omgangskretsen din personer som...<br>Flere svar er mulig.                                                       |         |                   |
| Spørsmålstekst                                                                                                                       | Vil kunne hjelpe deg å finne en jobb, hvis det blir nødvendig?                                                            |         |                   |
| Instruksjoner til intervjueren                                                                                                       | [Spurt hvis u=1. ]                                                                                                        |         |                   |
| Kommentarer                                                                                                                          | Vil kunne hjelpe deg å finne en jobb, hvis det blir nødvendig? (Er det i omgangskretsen din personer som...)              |         |                   |
| Verdi                                                                                                                                | Merkelapp                                                                                                                 | Enheter | Prosent           |
| 0                                                                                                                                    |                                                                                                                           | 624     | <div></div> 13.3% |
| 1                                                                                                                                    | Vil kunne hjelpe deg å finne en jobb, hvis det blir nødvendig?                                                            | 538     | <div></div> 11.5% |
| 97                                                                                                                                   | Ikke svart                                                                                                                | 22      | <div></div> 0.5%  |
| 98                                                                                                                                   | Ikke spurt                                                                                                                | 3505    | <div></div> 74.7% |
| Advarsel: disse tallene indikerer antall enheter (cases) i datafilen. De kan ikke tolkes som oppsummert statistikk for populasjonen. |                                                                                                                           |         |                   |

| # r7frnet_2: Er det noen i omgangskretsen som: Kan låne deg et større pengebeløp                                                     |                                                                                                                         |         |             |       |
|--------------------------------------------------------------------------------------------------------------------------------------|-------------------------------------------------------------------------------------------------------------------------|---------|-------------|-------|
| Informasjon                                                                                                                          | [Type= diskret] [Format=numeric] [Rekkevidde= 1-1] [Missing=*]                                                          |         |             |       |
| Statistikk [NW/ W]                                                                                                                   | [Gyldige=4689 /-] [Ugyldig=0 /-]                                                                                        |         |             |       |
| Tekst før spørsmål                                                                                                                   | Er det i omgangskretsen din personer som...<br>Flere svar er mulig.                                                     |         |             |       |
| Spørsmålstekst                                                                                                                       | Vil kunne låne deg et større pengebeløp (f.eks. 20 000 kroner)?                                                         |         |             |       |
| Instruksjoner til intervjueren                                                                                                       | [Spurt hvis u=1. ]                                                                                                      |         |             |       |
| Kommentarer                                                                                                                          | Vil kunne låne deg et større pengebeløp (f.eks. 20 000 kroner)? (Er det i omgangskretsen din personer som...)           |         |             |       |
| Verdi                                                                                                                                | Merkelapp                                                                                                               | Enheter | Prosent     |       |
| 0                                                                                                                                    |                                                                                                                         | 535     | <div></div> | 11.4% |
| 1                                                                                                                                    | Vil kunne låne deg et større pengebeløp (f.eks. 20 000 kroner)?                                                         | 627     | <div></div> | 13.4% |
| 97                                                                                                                                   | Ikke svart                                                                                                              | 22      | <div></div> | 0.5%  |
| 98                                                                                                                                   | Ikke spurt                                                                                                              | 3505    | <div></div> | 74.7% |
| Advarsel: disse tallene indikerer antall enheter (cases) i datafilen. De kan ikke tolkes som oppsummert statistikk for populasjonen. |                                                                                                                         |         |             |       |
| # r7frnet_3: Er det noen i omgangskretsen som: Sitter i en høy stilling i næringslivet/offentlig/politikk                            |                                                                                                                         |         |             |       |
| Informasjon                                                                                                                          | [Type= diskret] [Format=numeric] [Rekkevidde= 1-1] [Missing=*]                                                          |         |             |       |
| Statistikk [NW/ W]                                                                                                                   | [Gyldige=4689 /-] [Ugyldig=0 /-]                                                                                        |         |             |       |
| Tekst før spørsmål                                                                                                                   | Er det i omgangskretsen din personer som...<br>Flere svar er mulig.                                                     |         |             |       |
| Spørsmålstekst                                                                                                                       | Sitter i en høy stilling i næringslivet, i offentlig administrasjon eller i politikken?                                 |         |             |       |
| Instruksjoner til intervjueren                                                                                                       | [Spurt hvis u=1. ]                                                                                                      |         |             |       |
| Kommentarer                                                                                                                          | Sitter i en høy stilling i næringslivet, i offentlig administrasjon eller i politikken? (Er det i omgangskretsen din pe |         |             |       |
| Verdi                                                                                                                                | Merkelapp                                                                                                               | Enheter | Prosent     |       |
| 0                                                                                                                                    |                                                                                                                         | 782     | <div></div> | 16.7% |
| 1                                                                                                                                    | Sitter i en høy stilling i næringslivet, i offentlig administrasjon eller i politikken?                                 | 380     | <div></div> | 8.1%  |
| 97                                                                                                                                   | Ikke svart                                                                                                              | 22      | <div></div> | 0.5%  |
| 98                                                                                                                                   | Ikke spurt                                                                                                              | 3505    | <div></div> | 74.7% |
| Advarsel: disse tallene indikerer antall enheter (cases) i datafilen. De kan ikke tolkes som oppsummert statistikk for populasjonen. |                                                                                                                         |         |             |       |
| # r7frnet_4: Har ingen slike i omgangskrets                                                                                          |                                                                                                                         |         |             |       |
| Informasjon                                                                                                                          | [Type= diskret] [Format=numeric] [Rekkevidde= 1-1] [Missing=*]                                                          |         |             |       |
| Statistikk [NW/ W]                                                                                                                   | [Gyldige=4689 /-] [Ugyldig=0 /-]                                                                                        |         |             |       |
| Tekst før spørsmål                                                                                                                   | Er det i omgangskretsen din personer som...<br>Flere svar er mulig.                                                     |         |             |       |
| Spørsmålstekst                                                                                                                       | Jeg har ingen slike personer i min omgangskrets                                                                         |         |             |       |
| Instruksjoner til intervjueren                                                                                                       | [Spurt hvis u=1. ]                                                                                                      |         |             |       |
| Kommentarer                                                                                                                          | Jeg har ingen slike personer i min omgangskrets (Er det i omgangskretsen din personer som...)                           |         |             |       |
| Verdi                                                                                                                                | Merkelapp                                                                                                               | Enheter | Prosent     |       |
| 0                                                                                                                                    |                                                                                                                         | 850     | <div></div> | 18.1% |
| 1                                                                                                                                    | Jeg har ingen slike personer i min omgangskrets                                                                         | 312     | <div></div> | 6.7%  |
| 97                                                                                                                                   | Ikke svart                                                                                                              | 22      | <div></div> | 0.5%  |
| 98                                                                                                                                   | Ikke spurt                                                                                                              | 3505    | <div></div> | 74.7% |
| Advarsel: disse tallene indikerer antall enheter (cases) i datafilen. De kan ikke tolkes som oppsummert statistikk for populasjonen. |                                                                                                                         |         |             |       |

| # r7fri5: Hvor ofte drar du på reiser med minst én overnatting?                                                                      |                                                                                       |         |                              |
|--------------------------------------------------------------------------------------------------------------------------------------|---------------------------------------------------------------------------------------|---------|------------------------------|
| Informasjon                                                                                                                          | [Type= diskret] [Format=numeric] [Rekkevidde= 1-7] [Missing=*]                        |         |                              |
| Statistikk [NW/ W]                                                                                                                   | [Gyldige=4689 /-] [Ugyldig=0 /-]                                                      |         |                              |
| Spørsmålstekst                                                                                                                       | Hvor ofte drar du vanligvis på reiser med minst én overnatting?                       |         |                              |
| Tekst etter spørsmål                                                                                                                 | Regn med både jobbreiser, feriereiser og helgeturer, etc.                             |         |                              |
| Instruksjoner til intervjueren                                                                                                       | [Spurt hvis u=1. ]                                                                    |         |                              |
| Verdi                                                                                                                                | Merkelapp                                                                             | Enheter | Prosent                      |
| 1                                                                                                                                    | Ukentlig                                                                              | 34      | <div><div></div></div> 0.7%  |
| 2                                                                                                                                    | Månedlig                                                                              | 345     | <div><div></div></div> 7.4%  |
| 3                                                                                                                                    | Minst én gang hvert halvår                                                            | 551     | <div><div></div></div> 11.8% |
| 4                                                                                                                                    | Minst én gang i året                                                                  | 161     | <div><div></div></div> 3.4%  |
| 5                                                                                                                                    | Sjeldnere                                                                             | 47      | <div><div></div></div> 1.0%  |
| 6                                                                                                                                    | Aldri                                                                                 | 15      | <div><div></div></div> 0.3%  |
| 7                                                                                                                                    | Vet ikke                                                                              | 7       | <div><div></div></div> 0.1%  |
| 97                                                                                                                                   | Ikke svart                                                                            | 24      | <div><div></div></div> 0.5%  |
| 98                                                                                                                                   | Ikke spurt                                                                            | 3505    | <div><div></div></div> 74.7% |
| Advarsel: disse tallene indikerer antall enheter (cases) i datafilen. De kan ikke tolkes som oppsummert statistikk for populasjonen. |                                                                                       |         |                              |
| # r7fri5b: Reise i minst 3 uker sammenhengende i løpet av det siste året?                                                            |                                                                                       |         |                              |
| Informasjon                                                                                                                          | [Type= diskret] [Format=numeric] [Rekkevidde= 1-3] [Missing=*]                        |         |                              |
| Statistikk [NW/ W]                                                                                                                   | [Gyldige=4689 /-] [Ugyldig=0 /-]                                                      |         |                              |
| Spørsmålstekst                                                                                                                       | Har du oppholdt deg på reise i minst 3 uker sammenhengende i løpet av det siste året? |         |                              |
| Instruksjoner til intervjueren                                                                                                       | [Spurt hvis u=1 og RANGE (R7FRI5,1,5). ]                                              |         |                              |
| Kommentarer                                                                                                                          | Har du oppholdt deg på reise i minst 3 uker sammenhengende i løpet av det siste året? |         |                              |
| Verdi                                                                                                                                | Merkelapp                                                                             | Enheter | Prosent                      |
| 1                                                                                                                                    | Ja                                                                                    | 318     | <div><div></div></div> 6.8%  |
| 2                                                                                                                                    | Nei                                                                                   | 817     | <div><div></div></div> 17.4% |
| 3                                                                                                                                    | Vet ikke                                                                              | 3       | <div><div></div></div> 0.1%  |
| 97                                                                                                                                   | Ikke svart                                                                            | 0       |                              |
| 98                                                                                                                                   | Ikke spurt                                                                            | 3551    | <div><div></div></div> 75.7% |
| Advarsel: disse tallene indikerer antall enheter (cases) i datafilen. De kan ikke tolkes som oppsummert statistikk for populasjonen. |                                                                                       |         |                              |
| # r7fri5c_1: Lengde på lengste tur det siste året                                                                                    |                                                                                       |         |                              |
| Informasjon                                                                                                                          | [Type= kontinuerlig] [Format=numeric] [Missing=*]                                     |         |                              |
| Statistikk [NW/ W]                                                                                                                   | [Gyldige=4689 /-] [Ugyldig=0 /-]                                                      |         |                              |
| Spørsmålstekst                                                                                                                       | Hvor lenge varte den lengste reisen din det siste året?                               |         |                              |
| Tekst etter spørsmål                                                                                                                 | Noter antall uker:                                                                    |         |                              |
| Instruksjoner til intervjueren                                                                                                       | [Spurt hvis u=1 og R7FRI5b=1. ]                                                       |         |                              |
| Verdi                                                                                                                                | Merkelapp                                                                             | Enheter | Prosent                      |
| 97                                                                                                                                   | Ikke svart                                                                            | 4       | <div><div></div></div> 0.1%  |
| 98                                                                                                                                   | Ikke spurt                                                                            | 4371    | <div><div></div></div> 99.9% |
| Advarsel: disse tallene indikerer antall enheter (cases) i datafilen. De kan ikke tolkes som oppsummert statistikk for populasjonen. |                                                                                       |         |                              |
| # r7fri6: Tid brukt på hobby- og fritidsaktiviteter en vanlig uke                                                                    |                                                                                       |         |                              |
| Informasjon                                                                                                                          | [Type= diskret] [Format=numeric] [Rekkevidde= 1-6] [Missing=*]                        |         |                              |

| # r7fri6: Tid brukt på hobby- og fritidsaktiviteter en vanlig uke                                                                    |                                                                                                                                                                                   |         |                              |
|--------------------------------------------------------------------------------------------------------------------------------------|-----------------------------------------------------------------------------------------------------------------------------------------------------------------------------------|---------|------------------------------|
| Statistikk [NW/ W]                                                                                                                   | [Gyldige=4689 /-] [Ugyldig=0 /-]                                                                                                                                                  |         |                              |
| Spørsmålstekst                                                                                                                       | Hvor mye tid bruker du på hobby- og fritidsaktiviteter i løpet av en vanlig uke?                                                                                                  |         |                              |
| Tekst etter spørsmål                                                                                                                 | F.eks. delta i idrettsaktiviteter, korps, kor, friluftsliv, foreningsmøter og samlinger. Regn med både organiserte og uorganiserte aktiviteter.                                   |         |                              |
| Instruksjoner til intervjueren                                                                                                       | [Spurt hvis u=1. ]                                                                                                                                                                |         |                              |
| Verdi                                                                                                                                | Merkelapp                                                                                                                                                                         | Enheter | Prosent                      |
| 1                                                                                                                                    | Mer enn 5 timer                                                                                                                                                                   | 302     | <div><div></div></div> 6.4%  |
| 2                                                                                                                                    | 2-5 timer                                                                                                                                                                         | 385     | <div><div></div></div> 8.2%  |
| 3                                                                                                                                    | 1-2 timer                                                                                                                                                                         | 195     | <div><div></div></div> 4.2%  |
| 4                                                                                                                                    | Mindre enn 1 time                                                                                                                                                                 | 97      | <div><div></div></div> 2.1%  |
| 5                                                                                                                                    | Deltar ikke i hobby- eller fritidsaktiviteter                                                                                                                                     | 150     | <div><div></div></div> 3.2%  |
| 6                                                                                                                                    | Vet ikke                                                                                                                                                                          | 32      | <div><div></div></div> 0.7%  |
| 97                                                                                                                                   | Ikke svart                                                                                                                                                                        | 23      | <div><div></div></div> 0.5%  |
| 98                                                                                                                                   | Ikke spurt                                                                                                                                                                        | 3505    | <div><div></div></div> 74.7% |
| Advarsel: disse tallene indikerer antall enheter (cases) i datafilen. De kan ikke tolkes som oppsummert statistikk for populasjonen. |                                                                                                                                                                                   |         |                              |
| # r7fri7_1: Gir hjelp til: Slektninger du ikke bor med, naboer/venner/kolleger                                                       |                                                                                                                                                                                   |         |                              |
| Informasjon                                                                                                                          | [Type= diskret] [Format=numeric] [Rekkevidde= 1-1] [Missing=*]                                                                                                                    |         |                              |
| Statistikk [NW/ W]                                                                                                                   | [Gyldige=4689 /-] [Ugyldig=0 /-]                                                                                                                                                  |         |                              |
| Tekst før spørsmål                                                                                                                   | Gir du regelmessig hjelp til noen av de følgende?<br>Flere svar er mulig                                                                                                          |         |                              |
| Spørsmålstekst                                                                                                                       | Slektninger du ikke bor sammen med, naboer, venner eller kolleger (f.eks. hjelp til skyss, matinnkjøp, hagearbeid, rydding og vasking, tilsyn og pass, omsorg eller annen hjelp). |         |                              |
| Instruksjoner til intervjueren                                                                                                       | [Spurt hvis u=1. ]                                                                                                                                                                |         |                              |
| Kommentarer                                                                                                                          | Slektninger du ikke bor sammen med, naboer, venner eller kolleger (f.eks. hjelp til skyss, matinnkjøp, hagearbeid, ryddi                                                          |         |                              |
| Verdi                                                                                                                                | Merkelapp                                                                                                                                                                         | Enheter | Prosent                      |
| 0                                                                                                                                    |                                                                                                                                                                                   | 627     | <div><div></div></div> 13.4% |
| 1                                                                                                                                    | Slektninger du ikke bor sammen med, naboer, venner eller kolleger (f.eks. hjelp til skyss, matinnkjøp, hagearbeid, rydding og vasking, tilsyn og pass, omsorg eller annen hjelp). | 535     | <div><div></div></div> 11.4% |
| 97                                                                                                                                   | Ikke svart                                                                                                                                                                        | 22      | <div><div></div></div> 0.5%  |
| 98                                                                                                                                   | Ikke spurt                                                                                                                                                                        | 3505    | <div><div></div></div> 74.7% |
| Advarsel: disse tallene indikerer antall enheter (cases) i datafilen. De kan ikke tolkes som oppsummert statistikk for populasjonen. |                                                                                                                                                                                   |         |                              |
| # r7fri7_2: Gir hjelp til: Noen i husholdningen med spesielle omsorgsbehov                                                           |                                                                                                                                                                                   |         |                              |
| Informasjon                                                                                                                          | [Type= diskret] [Format=numeric] [Rekkevidde= 1-1] [Missing=*]                                                                                                                    |         |                              |
| Statistikk [NW/ W]                                                                                                                   | [Gyldige=4689 /-] [Ugyldig=0 /-]                                                                                                                                                  |         |                              |
| Tekst før spørsmål                                                                                                                   | Gir du regelmessig hjelp til noen av de følgende?<br>Flere svar er mulig                                                                                                          |         |                              |
| Spørsmålstekst                                                                                                                       | Noen i din egen husholdning som har spesielle omsorgsbehov (f.eks. hjelp til eldre, syke og funksjonshemmede).                                                                    |         |                              |
| Instruksjoner til intervjueren                                                                                                       | [Spurt hvis u=1. ]                                                                                                                                                                |         |                              |
| Kommentarer                                                                                                                          | Noen i din egen husholdning som har spesielle omsorgsbehov (f.eks. hjelp til eldre, syke og funksjonshemmede). (Gir du re                                                         |         |                              |
| Verdi                                                                                                                                | Merkelapp                                                                                                                                                                         | Enheter | Prosent                      |
| 0                                                                                                                                    |                                                                                                                                                                                   | 1013    | <div><div></div></div> 21.6% |

| # r7fri7_2: Gir hjelp til: Noen i husholdningen med spesielle omsorgsbehov                                                           |                                                                                                                |         |                              |
|--------------------------------------------------------------------------------------------------------------------------------------|----------------------------------------------------------------------------------------------------------------|---------|------------------------------|
| Verdi                                                                                                                                | Merkelapp                                                                                                      | Enheter | Prosent                      |
| 1                                                                                                                                    | Noen i din egen husholdning som har spesielle omsorgsbehov (f.eks. hjelp til eldre, syke og funksjonshemmede). | 149     | <div><div></div></div> 3.2%  |
| 97                                                                                                                                   | Ikke svart                                                                                                     | 22      | <div><div></div></div> 0.5%  |
| 98                                                                                                                                   | Ikke spurt                                                                                                     | 3505    | <div><div></div></div> 74.7% |
| Advarsel: disse tallene indikerer antall enheter (cases) i datafilen. De kan ikke tolkes som oppsummert statistikk for populasjonen. |                                                                                                                |         |                              |
| # r7fri7_3: Gir hjelp til: Nei                                                                                                       |                                                                                                                |         |                              |
| Informasjon                                                                                                                          | [Type= diskret] [Format=numeric] [Rekkevidde= 1-1] [Missing=*]                                                 |         |                              |
| Statistikk [NW/ W]                                                                                                                   | [Gyldige=4689 /-] [Ugyldig=0 /-]                                                                               |         |                              |
| Tekst før spørsmål                                                                                                                   | Gir du regelmessig hjelp til noen av de følgende?<br>Flere svar er mulig                                       |         |                              |
| Spørsmålstekst                                                                                                                       | Nei                                                                                                            |         |                              |
| Instruksjoner til intervjueren                                                                                                       | [Spurt hvis u=1. ]                                                                                             |         |                              |
| Verdi                                                                                                                                | Merkelapp                                                                                                      | Enheter | Prosent                      |
| 0                                                                                                                                    |                                                                                                                | 660     | <div><div></div></div> 14.1% |
| 1                                                                                                                                    | Nei                                                                                                            | 502     | <div><div></div></div> 10.7% |
| 97                                                                                                                                   | Ikke svart                                                                                                     | 22      | <div><div></div></div> 0.5%  |
| 98                                                                                                                                   | Ikke spurt                                                                                                     | 3505    | <div><div></div></div> 74.7% |
| Advarsel: disse tallene indikerer antall enheter (cases) i datafilen. De kan ikke tolkes som oppsummert statistikk for populasjonen. |                                                                                                                |         |                              |
| # r7fri7_4: Gir hjelp til: Vet ikke                                                                                                  |                                                                                                                |         |                              |
| Informasjon                                                                                                                          | [Type= diskret] [Format=numeric] [Rekkevidde= 1-1] [Missing=*]                                                 |         |                              |
| Statistikk [NW/ W]                                                                                                                   | [Gyldige=4689 /-] [Ugyldig=0 /-]                                                                               |         |                              |
| Tekst før spørsmål                                                                                                                   | Gir du regelmessig hjelp til noen av de følgende?<br>Flere svar er mulig                                       |         |                              |
| Spørsmålstekst                                                                                                                       | Vet ikke                                                                                                       |         |                              |
| Instruksjoner til intervjueren                                                                                                       | [Spurt hvis u=1. ]                                                                                             |         |                              |
| Verdi                                                                                                                                | Merkelapp                                                                                                      | Enheter | Prosent                      |
| 0                                                                                                                                    |                                                                                                                | 1120    | <div><div></div></div> 23.9% |
| 1                                                                                                                                    | Vet ikke                                                                                                       | 42      | <div><div></div></div> 0.9%  |
| 97                                                                                                                                   | Ikke svart                                                                                                     | 22      | <div><div></div></div> 0.5%  |
| 98                                                                                                                                   | Ikke spurt                                                                                                     | 3505    | <div><div></div></div> 74.7% |
| Advarsel: disse tallene indikerer antall enheter (cases) i datafilen. De kan ikke tolkes som oppsummert statistikk for populasjonen. |                                                                                                                |         |                              |
| # r7fri7b_1: Utfører type hjelp: Samvær                                                                                              |                                                                                                                |         |                              |
| Informasjon                                                                                                                          | [Type= diskret] [Format=numeric] [Rekkevidde= 1-1] [Missing=*]                                                 |         |                              |
| Statistikk [NW/ W]                                                                                                                   | [Gyldige=4689 /-] [Ugyldig=0 /-]                                                                               |         |                              |
| Tekst før spørsmål                                                                                                                   | Hvilken type hjelp utfører du?<br>Flere svar er mulig                                                          |         |                              |
| Spørsmålstekst                                                                                                                       | Samvær, kontakt                                                                                                |         |                              |
| Instruksjoner til intervjueren                                                                                                       | [Spurt hvis u=1, R7FRI7_1=1 eller R7FRI7_2=2. ]                                                                |         |                              |
| Verdi                                                                                                                                | Merkelapp                                                                                                      | Enheter | Prosent                      |
| 0                                                                                                                                    |                                                                                                                | 222     | <div><div></div></div> 4.7%  |
| 1                                                                                                                                    | Samvær, kontakt                                                                                                | 389     | <div><div></div></div> 8.3%  |



| # r7fri7b_1: Utfører type hjelp: Samvær                                                                                              |                                                                                                               |         |                   |
|--------------------------------------------------------------------------------------------------------------------------------------|---------------------------------------------------------------------------------------------------------------|---------|-------------------|
| Verdi                                                                                                                                | Merkelapp                                                                                                     | Enheter | Prosent           |
| 97                                                                                                                                   | Ikke svart                                                                                                    | 0       |                   |
| 98                                                                                                                                   | Ikke spurt                                                                                                    | 4078    | <div></div> 87.0% |
| Advarsel: disse tallene indikerer antall enheter (cases) i datafilen. De kan ikke tolkes som oppsummert statistikk for populasjonen. |                                                                                                               |         |                   |
| # r7fri7b_2: Utfører type hjelp: Tilsyn                                                                                              |                                                                                                               |         |                   |
| Informasjon                                                                                                                          | [Type= diskret] [Format=numeric] [Rekkevidde= 1-1] [Missing=*]                                                |         |                   |
| Statistikk [NW/ W]                                                                                                                   | [Gyldige=4689 /-] [Ugyldig=0 /-]                                                                              |         |                   |
| Tekst før spørsmål                                                                                                                   | Hvilken type hjelp utfører du?<br>Flere svar er mulig                                                         |         |                   |
| Spørsmålstekst                                                                                                                       | Pass eller tilsyn (f.eks. barnepass, regelmessig telefonkontakt, annet pass)                                  |         |                   |
| Instruksjoner til intervjueren                                                                                                       | [Spurt hvis u=1, R7FRI7_1=1 eller R7FRI7_2=2. ]                                                               |         |                   |
| Kommentarer                                                                                                                          | Pass eller tilsyn (f.eks. barnepass, regelmessig telefonkontakt, annet pass) (Hvilken type hjelp utfører du?) |         |                   |
| Verdi                                                                                                                                | Merkelapp                                                                                                     | Enheter | Prosent           |
| 0                                                                                                                                    |                                                                                                               | 329     | <div></div> 7.0%  |
| 1                                                                                                                                    | Pass eller tilsyn (f.eks. barnepass, regelmessig telefonkontakt, annet pass)                                  | 282     | <div></div> 6.0%  |
| 97                                                                                                                                   | Ikke svart                                                                                                    | 0       |                   |
| 98                                                                                                                                   | Ikke spurt                                                                                                    | 4078    | <div></div> 87.0% |
| Advarsel: disse tallene indikerer antall enheter (cases) i datafilen. De kan ikke tolkes som oppsummert statistikk for populasjonen. |                                                                                                               |         |                   |
| # r7fri7b_3: Utfører type hjelp: Personlig omsorg                                                                                    |                                                                                                               |         |                   |
| Informasjon                                                                                                                          | [Type= diskret] [Format=numeric] [Rekkevidde= 1-1] [Missing=*]                                                |         |                   |
| Statistikk [NW/ W]                                                                                                                   | [Gyldige=4689 /-] [Ugyldig=0 /-]                                                                              |         |                   |
| Tekst før spørsmål                                                                                                                   | Hvilken type hjelp utfører du?<br>Flere svar er mulig                                                         |         |                   |
| Spørsmålstekst                                                                                                                       | Personlig omsorg (f.eks. hygiene, hjelp til medisiner, forflytning)                                           |         |                   |
| Instruksjoner til intervjueren                                                                                                       | [Spurt hvis u=1, R7FRI7_1=1 eller R7FRI7_2=2. ]                                                               |         |                   |
| Kommentarer                                                                                                                          | Personlig omsorg (f.eks. hygiene, hjelp til medisiner, forflytning) (Hvilken type hjelp utfører du?)          |         |                   |
| Verdi                                                                                                                                | Merkelapp                                                                                                     | Enheter | Prosent           |
| 0                                                                                                                                    |                                                                                                               | 539     | <div></div> 11.5% |
| 1                                                                                                                                    | Personlig omsorg (f.eks. hygiene, hjelp til medisiner, forflytning)                                           | 72      | <div></div> 1.5%  |
| 97                                                                                                                                   | Ikke svart                                                                                                    | 0       |                   |
| 98                                                                                                                                   | Ikke spurt                                                                                                    | 4078    | <div></div> 87.0% |
| Advarsel: disse tallene indikerer antall enheter (cases) i datafilen. De kan ikke tolkes som oppsummert statistikk for populasjonen. |                                                                                                               |         |                   |
| # r7fri7b_4: Utfører type hjelp: Husarbeid                                                                                           |                                                                                                               |         |                   |
| Informasjon                                                                                                                          | [Type= diskret] [Format=numeric] [Rekkevidde= 1-1] [Missing=*]                                                |         |                   |
| Statistikk [NW/ W]                                                                                                                   | [Gyldige=4689 /-] [Ugyldig=0 /-]                                                                              |         |                   |
| Tekst før spørsmål                                                                                                                   | Hvilken type hjelp utfører du?<br>Flere svar er mulig                                                         |         |                   |
| Spørsmålstekst                                                                                                                       | Husarbeid (f.eks. vask, matlaging, matinnkjøp)                                                                |         |                   |
| Instruksjoner til intervjueren                                                                                                       | [Spurt hvis u=1, R7FRI7_1=1 eller R7FRI7_2=2. ]                                                               |         |                   |
| Verdi                                                                                                                                | Merkelapp                                                                                                     | Enheter | Prosent           |
| 0                                                                                                                                    |                                                                                                               | 449     | <div></div> 9.6%  |

| # r7fri7b_4: Utfører type hjelp: Husarbeid                                                                                           |                                                                                                                  |         |                              |
|--------------------------------------------------------------------------------------------------------------------------------------|------------------------------------------------------------------------------------------------------------------|---------|------------------------------|
| Verdi                                                                                                                                | Merkelapp                                                                                                        | Enheter | Prosent                      |
| 1                                                                                                                                    | Husarbeid (f.eks. vask, matlaging, matinnkjøp)                                                                   | 162     | <div><div></div></div> 3.5%  |
| 97                                                                                                                                   | Ikke svart                                                                                                       | 0       |                              |
| 98                                                                                                                                   | Ikke spurt                                                                                                       | 4078    | <div><div></div></div> 87.0% |
| Advarsel: disse tallene indikerer antall enheter (cases) i datafilen. De kan ikke tolkes som oppsummert statistikk for populasjonen. |                                                                                                                  |         |                              |
| # r7fri7b_5: Utfører type hjelp: Administrativt                                                                                      |                                                                                                                  |         |                              |
| Informasjon                                                                                                                          | [Type= diskret] [Format=numeric] [Rekkevidde= 1-1] [Missing=*]                                                   |         |                              |
| Statistikk [NW/ W]                                                                                                                   | [Gyldige=4689 /-] [Ugyldig=0 /-]                                                                                 |         |                              |
| Tekst før spørsmål                                                                                                                   | Hvilken type hjelp utfører du?<br>Flere svar er mulig                                                            |         |                              |
| Spørsmålstekst                                                                                                                       | Administrative oppgaver (f.eks. kontakt med myndigheter, helsehjelp eller bank)                                  |         |                              |
| Instruksjoner til intervjueren                                                                                                       | [Spurt hvis u=1, R7FRI7_1=1 eller R7FRI7_2=2. ]                                                                  |         |                              |
| Kommentarer                                                                                                                          | Administrative oppgaver (f.eks. kontakt med myndigheter, helsehjelp eller bank) (Hvilken type hjelp utfører du?) |         |                              |
| Verdi                                                                                                                                | Merkelapp                                                                                                        | Enheter | Prosent                      |
| 0                                                                                                                                    |                                                                                                                  | 447     | <div><div></div></div> 9.5%  |
| 1                                                                                                                                    | Administrative oppgaver (f.eks. kontakt med myndigheter, helsehjelp eller bank)                                  | 164     | <div><div></div></div> 3.5%  |
| 97                                                                                                                                   | Ikke svart                                                                                                       | 0       |                              |
| 98                                                                                                                                   | Ikke spurt                                                                                                       | 4078    | <div><div></div></div> 87.0% |
| Advarsel: disse tallene indikerer antall enheter (cases) i datafilen. De kan ikke tolkes som oppsummert statistikk for populasjonen. |                                                                                                                  |         |                              |
| # r7fri7b_6: Utfører type hjelp: Transport                                                                                           |                                                                                                                  |         |                              |
| Informasjon                                                                                                                          | [Type= diskret] [Format=numeric] [Rekkevidde= 1-1] [Missing=*]                                                   |         |                              |
| Statistikk [NW/ W]                                                                                                                   | [Gyldige=4689 /-] [Ugyldig=0 /-]                                                                                 |         |                              |
| Tekst før spørsmål                                                                                                                   | Hvilken type hjelp utfører du?<br>Flere svar er mulig                                                            |         |                              |
| Spørsmålstekst                                                                                                                       | Transport (f.eks. skyss med bil, hente/levere i barnehage/på skole)                                              |         |                              |
| Instruksjoner til intervjueren                                                                                                       | [Spurt hvis u=1, R7FRI7_1=1 eller R7FRI7_2=2. ]                                                                  |         |                              |
| Kommentarer                                                                                                                          | Transport (f.eks. skyss med bil, hente/levere i barnehage/på skole) (Hvilken type hjelp utfører du?)             |         |                              |
| Verdi                                                                                                                                | Merkelapp                                                                                                        | Enheter | Prosent                      |
| 0                                                                                                                                    |                                                                                                                  | 315     | <div><div></div></div> 6.7%  |
| 1                                                                                                                                    | Transport (f.eks. skyss med bil, hente/levere i barnehage/på skole)                                              | 296     | <div><div></div></div> 6.3%  |
| 97                                                                                                                                   | Ikke svart                                                                                                       | 0       |                              |
| 98                                                                                                                                   | Ikke spurt                                                                                                       | 4078    | <div><div></div></div> 87.0% |
| Advarsel: disse tallene indikerer antall enheter (cases) i datafilen. De kan ikke tolkes som oppsummert statistikk for populasjonen. |                                                                                                                  |         |                              |
| # r7fri7b_7: Utfører type hjelp: Hagearbeid eller lignende                                                                           |                                                                                                                  |         |                              |
| Informasjon                                                                                                                          | [Type= diskret] [Format=numeric] [Rekkevidde= 1-1] [Missing=*]                                                   |         |                              |
| Statistikk [NW/ W]                                                                                                                   | [Gyldige=4689 /-] [Ugyldig=0 /-]                                                                                 |         |                              |
| Tekst før spørsmål                                                                                                                   | Hvilken type hjelp utfører du?<br>Flere svar er mulig                                                            |         |                              |
| Spørsmålstekst                                                                                                                       | Hagearbeid, reparasjoner i hjemmet e.l.                                                                          |         |                              |
| Instruksjoner til intervjueren                                                                                                       | [Spurt hvis u=1, R7FRI7_1=1 eller R7FRI7_2=2. ]                                                                  |         |                              |

| # r7fri7b_7: Utfører type hjelp: Hagearbeid eller lignende                                                                           |                                                                       |         |                              |
|--------------------------------------------------------------------------------------------------------------------------------------|-----------------------------------------------------------------------|---------|------------------------------|
| Verdi                                                                                                                                | Merkelapp                                                             | Enheter | Prosent                      |
| 0                                                                                                                                    |                                                                       | 375     | <div><div></div></div> 8.0%  |
| 1                                                                                                                                    | Hagearbeid, reparasjoner i hjemmet e.l.                               | 236     | <div><div></div></div> 5.0%  |
| 97                                                                                                                                   | Ikke svart                                                            | 0       |                              |
| 98                                                                                                                                   | Ikke spurt                                                            | 4078    | <div><div></div></div> 87.0% |
| Advarsel: disse tallene indikerer antall enheter (cases) i datafilen. De kan ikke tolkes som oppsummert statistikk for populasjonen. |                                                                       |         |                              |
| # r7fri7b_8: Utfører type hjelp: Annet                                                                                               |                                                                       |         |                              |
| Informasjon                                                                                                                          | [Type= diskret] [Format=numeric] [Rekkevidde= 1-1] [Missing=*]        |         |                              |
| Statistikk [NW/ W]                                                                                                                   | [Gyldige=4689 /-] [Ugyldig=0 /-]                                      |         |                              |
| Tekst før spørsmål                                                                                                                   | Hvilken type hjelp utfører du?<br>Flere svar er mulig                 |         |                              |
| Spørsmålstekst                                                                                                                       | Annet                                                                 |         |                              |
| Instruksjoner til intervjueren                                                                                                       | [Spurt hvis u=1, R7FRI7_1=1 eller R7FRI7_2=2. ]                       |         |                              |
| Verdi                                                                                                                                | Merkelapp                                                             | Enheter | Prosent                      |
| 0                                                                                                                                    |                                                                       | 497     | <div><div></div></div> 10.6% |
| 1                                                                                                                                    | Annet                                                                 | 114     | <div><div></div></div> 2.4%  |
| 97                                                                                                                                   | Ikke svart                                                            | 0       |                              |
| 98                                                                                                                                   | Ikke spurt                                                            | 4078    | <div><div></div></div> 87.0% |
| Advarsel: disse tallene indikerer antall enheter (cases) i datafilen. De kan ikke tolkes som oppsummert statistikk for populasjonen. |                                                                       |         |                              |
| # r7fri7b_9: Utfører type hjelp: Vet ikke                                                                                            |                                                                       |         |                              |
| Informasjon                                                                                                                          | [Type= diskret] [Format=numeric] [Rekkevidde= 1-1] [Missing=*]        |         |                              |
| Statistikk [NW/ W]                                                                                                                   | [Gyldige=4689 /-] [Ugyldig=0 /-]                                      |         |                              |
| Tekst før spørsmål                                                                                                                   | Hvilken type hjelp utfører du?<br>Flere svar er mulig                 |         |                              |
| Spørsmålstekst                                                                                                                       | Vet ikke                                                              |         |                              |
| Instruksjoner til intervjueren                                                                                                       | [Spurt hvis u=1, R7FRI7_1=1 eller R7FRI7_2=2. ]                       |         |                              |
| Verdi                                                                                                                                | Merkelapp                                                             | Enheter | Prosent                      |
| 0                                                                                                                                    |                                                                       | 609     | <div><div></div></div> 13.0% |
| 1                                                                                                                                    | Vet ikke                                                              | 2       | <div><div></div></div> 0.0%  |
| 97                                                                                                                                   | Ikke svart                                                            | 0       |                              |
| 98                                                                                                                                   | Ikke spurt                                                            | 4078    | <div><div></div></div> 87.0% |
| Advarsel: disse tallene indikerer antall enheter (cases) i datafilen. De kan ikke tolkes som oppsummert statistikk for populasjonen. |                                                                       |         |                              |
| # r7fri7c: Tid brukt på å utføre hjelp en vanlig uke                                                                                 |                                                                       |         |                              |
| Informasjon                                                                                                                          | [Type= diskret] [Format=numeric] [Rekkevidde= 1-5] [Missing=*]        |         |                              |
| Statistikk [NW/ W]                                                                                                                   | [Gyldige=4689 /-] [Ugyldig=0 /-]                                      |         |                              |
| Spørsmålstekst                                                                                                                       | Hvor mye tid bruker du samlet sett på dette i løpet av en vanlig uke? |         |                              |
| Instruksjoner til intervjueren                                                                                                       | [Spurt hvis u=1, R7FRI7_1=1 eller R7FRI7_2=2. ]                       |         |                              |
| Verdi                                                                                                                                | Merkelapp                                                             | Enheter | Prosent                      |
| 1                                                                                                                                    | Mer enn 5 timer                                                       | 88      | <div><div></div></div> 1.9%  |
| 2                                                                                                                                    | 2-5 timer                                                             | 181     | <div><div></div></div> 3.9%  |
| 3                                                                                                                                    | 1-2 timer                                                             | 200     | <div><div></div></div> 4.3%  |

| # r7fri7c: Tid brukt på å utføre hjelp en vanlig uke                                                                                 |                                                                                                                        |         |                        |       |
|--------------------------------------------------------------------------------------------------------------------------------------|------------------------------------------------------------------------------------------------------------------------|---------|------------------------|-------|
| Verdi                                                                                                                                | Merkelapp                                                                                                              | Enheter | Prosent                |       |
| 4                                                                                                                                    | Mindre enn 1 time                                                                                                      | 104     | <div><div></div></div> | 2.2%  |
| 5                                                                                                                                    | Vet ikke                                                                                                               | 37      | <div><div></div></div> | 0.8%  |
| 97                                                                                                                                   | Ikke svart                                                                                                             | 1       | <div><div></div></div> | 0.0%  |
| 98                                                                                                                                   | Ikke spurt                                                                                                             | 4078    | <div><div></div></div> | 87.0% |
| Advarsel: disse tallene indikerer antall enheter (cases) i datafilen. De kan ikke tolkes som oppsummert statistikk for populasjonen. |                                                                                                                        |         |                        |       |
| # r7fri7d: Hvem hjelper du mest?                                                                                                     |                                                                                                                        |         |                        |       |
| Informasjon                                                                                                                          | [Type= diskret] [Format=numeric] [Rekkevidde= 1-7] [Missing=*]                                                         |         |                        |       |
| Statistikk [NW/ W]                                                                                                                   | [Gyldige=4689 /-] [Ugyldig=0 /-]                                                                                       |         |                        |       |
| Spørsmålstekst                                                                                                                       | Hvem hjelper du mest?                                                                                                  |         |                        |       |
| Instruksjoner til intervjueren                                                                                                       | [Spurt hvis u=1, R7FRI7_1=1 eller R7FRI7_2=2. ]                                                                        |         |                        |       |
| Verdi                                                                                                                                | Merkelapp                                                                                                              | Enheter | Prosent                |       |
| 1                                                                                                                                    | Ektefelle, samboer, eller tilsvarende                                                                                  | 80      | <div><div></div></div> | 1.7%  |
| 2                                                                                                                                    | Barn/barnebarn                                                                                                         | 210     | <div><div></div></div> | 4.5%  |
| 3                                                                                                                                    | Foreldre/svigerforeldre                                                                                                | 160     | <div><div></div></div> | 3.4%  |
| 4                                                                                                                                    | Søsken                                                                                                                 | 41      | <div><div></div></div> | 0.9%  |
| 5                                                                                                                                    | Besteforeldre                                                                                                          | 13      | <div><div></div></div> | 0.3%  |
| 6                                                                                                                                    | Annen slektning eller nærstående                                                                                       | 33      | <div><div></div></div> | 0.7%  |
| 7                                                                                                                                    | Annen relasjon (f.eks. nabo eller venn)                                                                                | 74      | <div><div></div></div> | 1.6%  |
| 97                                                                                                                                   | Ikke svart                                                                                                             | 0       | <div><div></div></div> |       |
| 98                                                                                                                                   | Ikke spurt                                                                                                             | 4078    | <div><div></div></div> | 87.0% |
| Advarsel: disse tallene indikerer antall enheter (cases) i datafilen. De kan ikke tolkes som oppsummert statistikk for populasjonen. |                                                                                                                        |         |                        |       |
| # r7fr31_1: Hvor godt passer beskrivelse av frivillig arbeid: Tilfredsstillende                                                      |                                                                                                                        |         |                        |       |
| Informasjon                                                                                                                          | [Type= diskret] [Format=numeric] [Rekkevidde= 1-7] [Missing=*]                                                         |         |                        |       |
| Statistikk [NW/ W]                                                                                                                   | [Gyldige=4689 /-] [Ugyldig=0 /-]                                                                                       |         |                        |       |
| Tekst før spørsmål                                                                                                                   | Om du tenker på hvordan du ser på frivillig arbeid, hvor godt eller dårlig synes du disse beskrivelsene passer?        |         |                        |       |
| Spørsmålstekst                                                                                                                       | Tilfredsstillende                                                                                                      |         |                        |       |
| Instruksjoner til intervjueren                                                                                                       | [Spurt hvis u=1. ]                                                                                                     |         |                        |       |
| Kommentarer                                                                                                                          | Tilfredsstillende (Om du tenker på hvordan du ser på frivillig arbeid, hvor godt eller dårlig synes du disse beskrivel |         |                        |       |
| Verdi                                                                                                                                | Merkelapp                                                                                                              | Enheter | Prosent                |       |
| 1                                                                                                                                    | Svært godt                                                                                                             | 148     | <div><div></div></div> | 3.2%  |
| 2                                                                                                                                    | Godt                                                                                                                   | 523     | <div><div></div></div> | 11.2% |
| 3                                                                                                                                    | Noe godt                                                                                                               | 212     | <div><div></div></div> | 4.5%  |
| 4                                                                                                                                    | Verken godt eller dårlig                                                                                               | 165     | <div><div></div></div> | 3.5%  |
| 5                                                                                                                                    | Noe dårlig                                                                                                             | 13      | <div><div></div></div> | 0.3%  |
| 6                                                                                                                                    | Dårlig                                                                                                                 | 4       | <div><div></div></div> | 0.1%  |
| 7                                                                                                                                    | Svært dårlig                                                                                                           | 1       | <div><div></div></div> | 0.0%  |
| 97                                                                                                                                   | Ikke svart                                                                                                             | 118     | <div><div></div></div> | 2.5%  |
| 98                                                                                                                                   | Ikke spurt                                                                                                             | 3505    | <div><div></div></div> | 74.7% |
| Advarsel: disse tallene indikerer antall enheter (cases) i datafilen. De kan ikke tolkes som oppsummert statistikk for populasjonen. |                                                                                                                        |         |                        |       |
| # r7fr31_2: Hvor godt passer beskrivelse av frivillig arbeid: Givende                                                                |                                                                                                                        |         |                        |       |
| Informasjon                                                                                                                          | [Type= diskret] [Format=numeric] [Rekkevidde= 1-7] [Missing=*]                                                         |         |                        |       |

| # r7fr31_2: Hvor godt passer beskrivelse av frivillig arbeid: Givende                                                                |                                                                                                                        |         |                        |       |
|--------------------------------------------------------------------------------------------------------------------------------------|------------------------------------------------------------------------------------------------------------------------|---------|------------------------|-------|
| Statistikk [NW/ W]                                                                                                                   | [Gyldige=4689 /-] [Ugyldig=0 /-]                                                                                       |         |                        |       |
| Tekst før spørsmål                                                                                                                   | Om du tenker på hvordan du ser på frivillig arbeid, hvor godt eller dårlig synes du disse beskrivelsene passer?        |         |                        |       |
| Spørsmålstekst                                                                                                                       | Givende                                                                                                                |         |                        |       |
| Instruksjoner til intervjueren                                                                                                       | [Spurt hvis u=1. ]                                                                                                     |         |                        |       |
| Kommentarer                                                                                                                          | Givende (Om du tenker på hvordan du ser på frivillig arbeid, hvor godt eller dårlig synes du disse beskrivelsene passe |         |                        |       |
| Verdi                                                                                                                                | Merkelapp                                                                                                              | Enheter | Prosent                |       |
| 1                                                                                                                                    | Svært godt                                                                                                             | 201     | <div><div></div></div> | 4.3%  |
| 2                                                                                                                                    | Godt                                                                                                                   | 539     | <div><div></div></div> | 11.5% |
| 3                                                                                                                                    | Noe godt                                                                                                               | 191     | <div><div></div></div> | 4.1%  |
| 4                                                                                                                                    | Verken godt eller dårlig                                                                                               | 128     | <div><div></div></div> | 2.7%  |
| 5                                                                                                                                    | Noe dårlig                                                                                                             | 9       | <div><div></div></div> | 0.2%  |
| 6                                                                                                                                    | Dårlig                                                                                                                 | 5       | <div><div></div></div> | 0.1%  |
| 7                                                                                                                                    | Svært dårlig                                                                                                           | 1       | <div><div></div></div> | 0.0%  |
| 97                                                                                                                                   | Ikke svart                                                                                                             | 110     | <div><div></div></div> | 2.3%  |
| 98                                                                                                                                   | Ikke spurt                                                                                                             | 3505    | <div><div></div></div> | 74.7% |
| Advarsel: disse tallene indikerer antall enheter (cases) i datafilen. De kan ikke tolkes som oppsummert statistikk for populasjonen. |                                                                                                                        |         |                        |       |
| # r7fr31_3: Hvor godt passer beskrivelse av frivillig arbeid: Spennende                                                              |                                                                                                                        |         |                        |       |
| Informasjon                                                                                                                          | [Type= diskret] [Format=numeric] [Rekkevidde= 1-7] [Missing=*]                                                         |         |                        |       |
| Statistikk [NW/ W]                                                                                                                   | [Gyldige=4689 /-] [Ugyldig=0 /-]                                                                                       |         |                        |       |
| Tekst før spørsmål                                                                                                                   | Om du tenker på hvordan du ser på frivillig arbeid, hvor godt eller dårlig synes du disse beskrivelsene passer?        |         |                        |       |
| Spørsmålstekst                                                                                                                       | Spennende                                                                                                              |         |                        |       |
| Instruksjoner til intervjueren                                                                                                       | [Spurt hvis u=1. ]                                                                                                     |         |                        |       |
| Kommentarer                                                                                                                          | Spennende (Om du tenker på hvordan du ser på frivillig arbeid, hvor godt eller dårlig synes du disse beskrivelsene pas |         |                        |       |
| Verdi                                                                                                                                | Merkelapp                                                                                                              | Enheter | Prosent                |       |
| 1                                                                                                                                    | Svært godt                                                                                                             | 75      | <div><div></div></div> | 1.6%  |
| 2                                                                                                                                    | Godt                                                                                                                   | 319     | <div><div></div></div> | 6.8%  |
| 3                                                                                                                                    | Noe godt                                                                                                               | 275     | <div><div></div></div> | 5.9%  |
| 4                                                                                                                                    | Verken godt eller dårlig                                                                                               | 300     | <div><div></div></div> | 6.4%  |
| 5                                                                                                                                    | Noe dårlig                                                                                                             | 56      | <div><div></div></div> | 1.2%  |
| 6                                                                                                                                    | Dårlig                                                                                                                 | 20      | <div><div></div></div> | 0.4%  |
| 7                                                                                                                                    | Svært dårlig                                                                                                           | 6       | <div><div></div></div> | 0.1%  |
| 97                                                                                                                                   | Ikke svart                                                                                                             | 133     | <div><div></div></div> | 2.8%  |
| 98                                                                                                                                   | Ikke spurt                                                                                                             | 3505    | <div><div></div></div> | 74.7% |
| Advarsel: disse tallene indikerer antall enheter (cases) i datafilen. De kan ikke tolkes som oppsummert statistikk for populasjonen. |                                                                                                                        |         |                        |       |
| # r7fr31_4: Hvor godt passer beskrivelse av frivillig arbeid: Viktig                                                                 |                                                                                                                        |         |                        |       |
| Informasjon                                                                                                                          | [Type= diskret] [Format=numeric] [Rekkevidde= 1-7] [Missing=*]                                                         |         |                        |       |
| Statistikk [NW/ W]                                                                                                                   | [Gyldige=4689 /-] [Ugyldig=0 /-]                                                                                       |         |                        |       |
| Tekst før spørsmål                                                                                                                   | Om du tenker på hvordan du ser på frivillig arbeid, hvor godt eller dårlig synes du disse beskrivelsene passer?        |         |                        |       |
| Spørsmålstekst                                                                                                                       | Viktig                                                                                                                 |         |                        |       |
| Instruksjoner til intervjueren                                                                                                       | [Spurt hvis u=1. ]                                                                                                     |         |                        |       |
| Kommentarer                                                                                                                          | Viktig (Om du tenker på hvordan du ser på frivillig arbeid, hvor godt eller dårlig synes du disse beskrivelsene passer |         |                        |       |

| # r7fr31_4: Hvor godt passer beskrivelse av frivillig arbeid: Viktig                                                                 |                                                                                                                        |         |                        |       |
|--------------------------------------------------------------------------------------------------------------------------------------|------------------------------------------------------------------------------------------------------------------------|---------|------------------------|-------|
| Verdi                                                                                                                                | Merkelapp                                                                                                              | Enheter | Prosent                |       |
| 1                                                                                                                                    | Svært godt                                                                                                             | 356     | <div><div></div></div> | 7.6%  |
| 2                                                                                                                                    | Godt                                                                                                                   | 489     | <div><div></div></div> | 10.4% |
| 3                                                                                                                                    | Noe godt                                                                                                               | 139     | <div><div></div></div> | 3.0%  |
| 4                                                                                                                                    | Verken godt eller dårlig                                                                                               | 91      | <div><div></div></div> | 1.9%  |
| 5                                                                                                                                    | Noe dårlig                                                                                                             | 5       | <div><div></div></div> | 0.1%  |
| 6                                                                                                                                    | Dårlig                                                                                                                 | 3       | <div><div></div></div> | 0.1%  |
| 7                                                                                                                                    | Svært dårlig                                                                                                           | 2       | <div><div></div></div> | 0.0%  |
| 97                                                                                                                                   | Ikke svart                                                                                                             | 99      | <div><div></div></div> | 2.1%  |
| 98                                                                                                                                   | Ikke spurt                                                                                                             | 3505    | <div><div></div></div> | 74.7% |
| Advarsel: disse tallene indikerer antall enheter (cases) i datafilen. De kan ikke tolkes som oppsummert statistikk for populasjonen. |                                                                                                                        |         |                        |       |
| # r7fr31_5: Hvor godt passer beskrivelse av frivillig arbeid: Morsomt                                                                |                                                                                                                        |         |                        |       |
| Informasjon                                                                                                                          | [Type= diskret] [Format=numeric] [Rekkevidde= 1-7] [Missing=*]                                                         |         |                        |       |
| Statistikk [NW/ W]                                                                                                                   | [Gyldige=4689 /-] [Ugyldig=0 /-]                                                                                       |         |                        |       |
| Tekst før spørsmål                                                                                                                   | Om du tenker på hvordan du ser på frivillig arbeid, hvor godt eller dårlig synes du disse beskrivelsene passer?        |         |                        |       |
| Spørsmålstekst                                                                                                                       | Morsomt                                                                                                                |         |                        |       |
| Instruksjoner til intervjueren                                                                                                       | [Spurt hvis u=1. ]                                                                                                     |         |                        |       |
| Kommentarer                                                                                                                          | Morsomt (Om du tenker på hvordan du ser på frivillig arbeid, hvor godt eller dårlig synes du disse beskrivelsene passe |         |                        |       |
| Verdi                                                                                                                                | Merkelapp                                                                                                              | Enheter | Prosent                |       |
| 1                                                                                                                                    | Svært godt                                                                                                             | 72      | <div><div></div></div> | 1.5%  |
| 2                                                                                                                                    | Godt                                                                                                                   | 320     | <div><div></div></div> | 6.8%  |
| 3                                                                                                                                    | Noe godt                                                                                                               | 317     | <div><div></div></div> | 6.8%  |
| 4                                                                                                                                    | Verken godt eller dårlig                                                                                               | 296     | <div><div></div></div> | 6.3%  |
| 5                                                                                                                                    | Noe dårlig                                                                                                             | 35      | <div><div></div></div> | 0.7%  |
| 6                                                                                                                                    | Dårlig                                                                                                                 | 16      | <div><div></div></div> | 0.3%  |
| 7                                                                                                                                    | Svært dårlig                                                                                                           | 6       | <div><div></div></div> | 0.1%  |
| 97                                                                                                                                   | Ikke svart                                                                                                             | 122     | <div><div></div></div> | 2.6%  |
| 98                                                                                                                                   | Ikke spurt                                                                                                             | 3505    | <div><div></div></div> | 74.7% |
| Advarsel: disse tallene indikerer antall enheter (cases) i datafilen. De kan ikke tolkes som oppsummert statistikk for populasjonen. |                                                                                                                        |         |                        |       |
| # r7fr31_6: Hvor godt passer beskrivelse av frivillig arbeid: Utfordrende                                                            |                                                                                                                        |         |                        |       |
| Informasjon                                                                                                                          | [Type= diskret] [Format=numeric] [Rekkevidde= 1-7] [Missing=*]                                                         |         |                        |       |
| Statistikk [NW/ W]                                                                                                                   | [Gyldige=4689 /-] [Ugyldig=0 /-]                                                                                       |         |                        |       |
| Tekst før spørsmål                                                                                                                   | Om du tenker på hvordan du ser på frivillig arbeid, hvor godt eller dårlig synes du disse beskrivelsene passer?        |         |                        |       |
| Spørsmålstekst                                                                                                                       | Utfordrende                                                                                                            |         |                        |       |
| Instruksjoner til intervjueren                                                                                                       | [Spurt hvis u=1. ]                                                                                                     |         |                        |       |
| Kommentarer                                                                                                                          | Utfordrende (Om du tenker på hvordan du ser på frivillig arbeid, hvor godt eller dårlig synes du disse beskrivelsene p |         |                        |       |
| Verdi                                                                                                                                | Merkelapp                                                                                                              | Enheter | Prosent                |       |
| 1                                                                                                                                    | Svært godt                                                                                                             | 101     | <div><div></div></div> | 2.2%  |
| 2                                                                                                                                    | Godt                                                                                                                   | 365     | <div><div></div></div> | 7.8%  |
| 3                                                                                                                                    | Noe godt                                                                                                               | 292     | <div><div></div></div> | 6.2%  |
| 4                                                                                                                                    | Verken godt eller dårlig                                                                                               | 239     | <div><div></div></div> | 5.1%  |
| 5                                                                                                                                    | Noe dårlig                                                                                                             | 34      | <div><div></div></div> | 0.7%  |

| # r7fr31_6: Hvor godt passer beskrivelse av frivillig arbeid: Utfordrende                                                            |                                                                                                                        |         |         |
|--------------------------------------------------------------------------------------------------------------------------------------|------------------------------------------------------------------------------------------------------------------------|---------|---------|
| Verdi                                                                                                                                | Merkelapp                                                                                                              | Enheter | Prosent |
| 6                                                                                                                                    | Dårlig                                                                                                                 | 19      | 0.4%    |
| 7                                                                                                                                    | Svært dårlig                                                                                                           | 9       | 0.2%    |
| 97                                                                                                                                   | Ikke svart                                                                                                             | 125     | 2.7%    |
| 98                                                                                                                                   | Ikke spurt                                                                                                             | 3505    | 74.7%   |
| Advarsel: disse tallene indikerer antall enheter (cases) i datafilen. De kan ikke tolkes som oppsummert statistikk for populasjonen. |                                                                                                                        |         |         |
| # r7fr31_7: Hvor godt passer beskrivelse av frivillig arbeid: Skuffende                                                              |                                                                                                                        |         |         |
| Informasjon                                                                                                                          | [Type= diskret] [Format=numeric] [Rekkevidde= 1-7] [Missing=*]                                                         |         |         |
| Statistikk [NW/ W]                                                                                                                   | [Gyldige=4689 /-] [Ugyldig=0 /-]                                                                                       |         |         |
| Tekst før spørsmål                                                                                                                   | Om du tenker på hvordan du ser på frivillig arbeid, hvor godt eller dårlig synes du disse beskrivelsene passer?        |         |         |
| Spørsmålstekst                                                                                                                       | Skuffende                                                                                                              |         |         |
| Instruksjoner til intervjueren                                                                                                       | [Spurt hvis u=1. ]                                                                                                     |         |         |
| Kommentarer                                                                                                                          | Skuffende (Om du tenker på hvordan du ser på frivillig arbeid, hvor godt eller dårlig synes du disse beskrivelsene pas |         |         |
| Verdi                                                                                                                                | Merkelapp                                                                                                              | Enheter | Prosent |
| 1                                                                                                                                    | Svært godt                                                                                                             | 7       | 0.1%    |
| 2                                                                                                                                    | Godt                                                                                                                   | 31      | 0.7%    |
| 3                                                                                                                                    | Noe godt                                                                                                               | 60      | 1.3%    |
| 4                                                                                                                                    | Verken godt eller dårlig                                                                                               | 340     | 7.3%    |
| 5                                                                                                                                    | Noe dårlig                                                                                                             | 197     | 4.2%    |
| 6                                                                                                                                    | Dårlig                                                                                                                 | 256     | 5.5%    |
| 7                                                                                                                                    | Svært dårlig                                                                                                           | 134     | 2.9%    |
| 97                                                                                                                                   | Ikke svart                                                                                                             | 159     | 3.4%    |
| 98                                                                                                                                   | Ikke spurt                                                                                                             | 3505    | 74.7%   |
| Advarsel: disse tallene indikerer antall enheter (cases) i datafilen. De kan ikke tolkes som oppsummert statistikk for populasjonen. |                                                                                                                        |         |         |
| # r7fr31_8: Hvor godt passer beskrivelse av frivillig arbeid: Følelsesmessig utmattende                                              |                                                                                                                        |         |         |
| Informasjon                                                                                                                          | [Type= diskret] [Format=numeric] [Rekkevidde= 1-7] [Missing=*]                                                         |         |         |
| Statistikk [NW/ W]                                                                                                                   | [Gyldige=4689 /-] [Ugyldig=0 /-]                                                                                       |         |         |
| Tekst før spørsmål                                                                                                                   | Om du tenker på hvordan du ser på frivillig arbeid, hvor godt eller dårlig synes du disse beskrivelsene passer?        |         |         |
| Spørsmålstekst                                                                                                                       | Følelsesmessig utmattende                                                                                              |         |         |
| Instruksjoner til intervjueren                                                                                                       | [Spurt hvis u=1. ]                                                                                                     |         |         |
| Kommentarer                                                                                                                          | Følelsesmessig utmattende (Om du tenker på hvordan du ser på frivillig arbeid, hvor godt eller dårlig synes du disse   |         |         |
| Verdi                                                                                                                                | Merkelapp                                                                                                              | Enheter | Prosent |
| 1                                                                                                                                    | Svært godt                                                                                                             | 17      | 0.4%    |
| 2                                                                                                                                    | Godt                                                                                                                   | 92      | 2.0%    |
| 3                                                                                                                                    | Noe godt                                                                                                               | 157     | 3.3%    |
| 4                                                                                                                                    | Verken godt eller dårlig                                                                                               | 357     | 7.6%    |
| 5                                                                                                                                    | Noe dårlig                                                                                                             | 144     | 3.1%    |
| 6                                                                                                                                    | Dårlig                                                                                                                 | 176     | 3.8%    |
| 7                                                                                                                                    | Svært dårlig                                                                                                           | 93      | 2.0%    |
| 97                                                                                                                                   | Ikke svart                                                                                                             | 148     | 3.2%    |
| 98                                                                                                                                   | Ikke spurt                                                                                                             | 3505    | 74.7%   |
| Advarsel: disse tallene indikerer antall enheter (cases) i datafilen. De kan ikke tolkes som oppsummert statistikk for populasjonen. |                                                                                                                        |         |         |

| # r7fr31_9: Hvor godt passer beskrivelse av frivillig arbeid: Fysisk slitsomt                                                        |                                                                                                                        |         |         |
|--------------------------------------------------------------------------------------------------------------------------------------|------------------------------------------------------------------------------------------------------------------------|---------|---------|
| Informasjon                                                                                                                          | [Type= diskret] [Format=numeric] [Rekkevidde= 1-7] [Missing=*]                                                         |         |         |
| Statistikk [NW/ W]                                                                                                                   | [Gyldige=4689 /-] [Ugyldig=0 /-]                                                                                       |         |         |
| Tekst før spørsmål                                                                                                                   | Om du tenker på hvordan du ser på frivillig arbeid, hvor godt eller dårlig synes du disse beskrivelsene passer?        |         |         |
| Spørsmålstekst                                                                                                                       | Fysisk slitsomt                                                                                                        |         |         |
| Instruksjoner til intervjueren                                                                                                       | [Spurt hvis u=1. ]                                                                                                     |         |         |
| Kommentarer                                                                                                                          | Fysisk slitsomt (Om du tenker på hvordan du ser på frivillig arbeid, hvor godt eller dårlig synes du disse beskrivelse |         |         |
| Verdi                                                                                                                                | Merkelapp                                                                                                              | Enheter | Prosent |
| 1                                                                                                                                    | Svært godt                                                                                                             | 13      | 0.3%    |
| 2                                                                                                                                    | Godt                                                                                                                   | 93      | 2.0%    |
| 3                                                                                                                                    | Noe godt                                                                                                               | 193     | 4.1%    |
| 4                                                                                                                                    | Verken godt eller dårlig                                                                                               | 378     | 8.1%    |
| 5                                                                                                                                    | Noe dårlig                                                                                                             | 133     | 2.8%    |
| 6                                                                                                                                    | Dårlig                                                                                                                 | 150     | 3.2%    |
| 7                                                                                                                                    | Svært dårlig                                                                                                           | 76      | 1.6%    |
| 97                                                                                                                                   | Ikke svart                                                                                                             | 148     | 3.2%    |
| 98                                                                                                                                   | Ikke spurt                                                                                                             | 3505    | 74.7%   |
| Advarsel: disse tallene indikerer antall enheter (cases) i datafilen. De kan ikke tolkes som oppsummert statistikk for populasjonen. |                                                                                                                        |         |         |
| # r7fr31_10: Hvor godt passer beskrivelse av frivillig arbeid: Frustrerende                                                          |                                                                                                                        |         |         |
| Informasjon                                                                                                                          | [Type= diskret] [Format=numeric] [Rekkevidde= 1-7] [Missing=*]                                                         |         |         |
| Statistikk [NW/ W]                                                                                                                   | [Gyldige=4689 /-] [Ugyldig=0 /-]                                                                                       |         |         |
| Tekst før spørsmål                                                                                                                   | Om du tenker på hvordan du ser på frivillig arbeid, hvor godt eller dårlig synes du disse beskrivelsene passer?        |         |         |
| Spørsmålstekst                                                                                                                       | Frustrerende                                                                                                           |         |         |
| Instruksjoner til intervjueren                                                                                                       | [Spurt hvis u=1. ]                                                                                                     |         |         |
| Kommentarer                                                                                                                          | Frustrerende (Om du tenker på hvordan du ser på frivillig arbeid, hvor godt eller dårlig synes du disse beskrivelsene  |         |         |
| Verdi                                                                                                                                | Merkelapp                                                                                                              | Enheter | Prosent |
| 1                                                                                                                                    | Svært godt                                                                                                             | 7       | 0.1%    |
| 2                                                                                                                                    | Godt                                                                                                                   | 52      | 1.1%    |
| 3                                                                                                                                    | Noe godt                                                                                                               | 146     | 3.1%    |
| 4                                                                                                                                    | Verken godt eller dårlig                                                                                               | 359     | 7.7%    |
| 5                                                                                                                                    | Noe dårlig                                                                                                             | 150     | 3.2%    |
| 6                                                                                                                                    | Dårlig                                                                                                                 | 193     | 4.1%    |
| 7                                                                                                                                    | Svært dårlig                                                                                                           | 113     | 2.4%    |
| 97                                                                                                                                   | Ikke svart                                                                                                             | 164     | 3.5%    |
| 98                                                                                                                                   | Ikke spurt                                                                                                             | 3505    | 74.7%   |
| Advarsel: disse tallene indikerer antall enheter (cases) i datafilen. De kan ikke tolkes som oppsummert statistikk for populasjonen. |                                                                                                                        |         |         |
| # r7fr31_11: Hvor godt passer beskrivelse av frivillig arbeid: Deprimerende                                                          |                                                                                                                        |         |         |
| Informasjon                                                                                                                          | [Type= diskret] [Format=numeric] [Rekkevidde= 1-7] [Missing=*]                                                         |         |         |
| Statistikk [NW/ W]                                                                                                                   | [Gyldige=4689 /-] [Ugyldig=0 /-]                                                                                       |         |         |
| Tekst før spørsmål                                                                                                                   | Om du tenker på hvordan du ser på frivillig arbeid, hvor godt eller dårlig synes du disse beskrivelsene passer?        |         |         |
| Spørsmålstekst                                                                                                                       | Deprimerende                                                                                                           |         |         |
| Instruksjoner til intervjueren                                                                                                       | [Spurt hvis u=1. ]                                                                                                     |         |         |



| # r7fr31_11: Hvor godt passer beskrivelse av frivillig arbeid: Deprimerende                                                          |                          |                                                                                                                        |         |
|--------------------------------------------------------------------------------------------------------------------------------------|--------------------------|------------------------------------------------------------------------------------------------------------------------|---------|
| Kommentarer                                                                                                                          |                          | Deprimerende (Om du tenker på hvordan du ser på frivillig arbeid, hvor godt eller dårlig synes du disse beskrivelsene  |         |
| Verdi                                                                                                                                | Merkelapp                | Enheter                                                                                                                | Prosent |
| 1                                                                                                                                    | Svært godt               | 5                                                                                                                      | 0.1%    |
| 2                                                                                                                                    | Godt                     | 24                                                                                                                     | 0.5%    |
| 3                                                                                                                                    | Noe godt                 | 71                                                                                                                     | 1.5%    |
| 4                                                                                                                                    | Verken godt eller dårlig | 321                                                                                                                    | 6.8%    |
| 5                                                                                                                                    | Noe dårlig               | 148                                                                                                                    | 3.2%    |
| 6                                                                                                                                    | Dårlig                   | 244                                                                                                                    | 5.2%    |
| 7                                                                                                                                    | Svært dårlig             | 208                                                                                                                    | 4.4%    |
| 97                                                                                                                                   | Ikke svart               | 163                                                                                                                    | 3.5%    |
| 98                                                                                                                                   | Ikke spurt               | 3505                                                                                                                   | 74.7%   |
| Advarsel: disse tallene indikerer antall enheter (cases) i datafilen. De kan ikke tolkes som oppsummert statistikk for populasjonen. |                          |                                                                                                                        |         |
| # r7fr31_12: Hvor godt passer beskrivelse av frivillig arbeid: Tidkrevende                                                           |                          |                                                                                                                        |         |
| Informasjon                                                                                                                          |                          | [Type= diskret] [Format=numeric] [Rekkevidde= 1-7] [Missing=*]                                                         |         |
| Statistikk [NW/ W]                                                                                                                   |                          | [Gyldige=4689 /-] [Ugyldig=0 /-]                                                                                       |         |
| Tekst før spørsmål                                                                                                                   |                          | Om du tenker på hvordan du ser på frivillig arbeid, hvor godt eller dårlig synes du disse beskrivelsene passer?        |         |
| Spørsmålstekst                                                                                                                       |                          | Tidkrevende                                                                                                            |         |
| Instruksjoner til intervjueren                                                                                                       |                          | [Spurt hvis u=1. ]                                                                                                     |         |
| Kommentarer                                                                                                                          |                          | Tidkrevende (Om du tenker på hvordan du ser på frivillig arbeid, hvor godt eller dårlig synes du disse beskrivelsene p |         |
| Verdi                                                                                                                                | Merkelapp                | Enheter                                                                                                                | Prosent |
| 1                                                                                                                                    | Svært godt               | 48                                                                                                                     | 1.0%    |
| 2                                                                                                                                    | Godt                     | 192                                                                                                                    | 4.1%    |
| 3                                                                                                                                    | Noe godt                 | 271                                                                                                                    | 5.8%    |
| 4                                                                                                                                    | Verken godt eller dårlig | 329                                                                                                                    | 7.0%    |
| 5                                                                                                                                    | Noe dårlig               | 79                                                                                                                     | 1.7%    |
| 6                                                                                                                                    | Dårlig                   | 75                                                                                                                     | 1.6%    |
| 7                                                                                                                                    | Svært dårlig             | 39                                                                                                                     | 0.8%    |
| 97                                                                                                                                   | Ikke svart               | 151                                                                                                                    | 3.2%    |
| 98                                                                                                                                   | Ikke spurt               | 3505                                                                                                                   | 74.7%   |
| Advarsel: disse tallene indikerer antall enheter (cases) i datafilen. De kan ikke tolkes som oppsummert statistikk for populasjonen. |                          |                                                                                                                        |         |
| # r7fr31_13: Hvor godt passer beskrivelse av frivillig arbeid: Lett                                                                  |                          |                                                                                                                        |         |
| Informasjon                                                                                                                          |                          | [Type= diskret] [Format=numeric] [Rekkevidde= 1-7] [Missing=*]                                                         |         |
| Statistikk [NW/ W]                                                                                                                   |                          | [Gyldige=4689 /-] [Ugyldig=0 /-]                                                                                       |         |
| Tekst før spørsmål                                                                                                                   |                          | Om du tenker på hvordan du ser på frivillig arbeid, hvor godt eller dårlig synes du disse beskrivelsene passer?        |         |
| Spørsmålstekst                                                                                                                       |                          | Lett                                                                                                                   |         |
| Instruksjoner til intervjueren                                                                                                       |                          | [Spurt hvis u=1. ]                                                                                                     |         |
| Kommentarer                                                                                                                          |                          | Lett (Om du tenker på hvordan du ser på frivillig arbeid, hvor godt eller dårlig synes du disse beskrivelsene passer?) |         |
| Verdi                                                                                                                                | Merkelapp                | Enheter                                                                                                                | Prosent |
| 1                                                                                                                                    | Svært godt               | 30                                                                                                                     | 0.6%    |
| 2                                                                                                                                    | Godt                     | 164                                                                                                                    | 3.5%    |
| 3                                                                                                                                    | Noe godt                 | 196                                                                                                                    | 4.2%    |
| 4                                                                                                                                    | Verken godt eller dårlig | 454                                                                                                                    | 9.7%    |

| # r7fr31_13: Hvor godt passer beskrivelse av frivillig arbeid: Lett                                                                  |                                                                                                                         |         |                        |       |
|--------------------------------------------------------------------------------------------------------------------------------------|-------------------------------------------------------------------------------------------------------------------------|---------|------------------------|-------|
| Verdi                                                                                                                                | Merkelapp                                                                                                               | Enheter | Prosent                |       |
| 5                                                                                                                                    | Noe dårlig                                                                                                              | 105     | <div><div></div></div> | 2.2%  |
| 6                                                                                                                                    | Dårlig                                                                                                                  | 57      | <div><div></div></div> | 1.2%  |
| 7                                                                                                                                    | Svært dårlig                                                                                                            | 26      | <div><div></div></div> | 0.6%  |
| 97                                                                                                                                   | Ikke svart                                                                                                              | 152     | <div><div></div></div> | 3.2%  |
| 98                                                                                                                                   | Ikke spurt                                                                                                              | 3505    | <div><div></div></div> | 74.7% |
| Advarsel: disse tallene indikerer antall enheter (cases) i datafilen. De kan ikke tolkes som oppsummert statistikk for populasjonen. |                                                                                                                         |         |                        |       |
| # r7fri14: Har du i det siste året deltatt i aksjoner for å forbedre samfunnet?                                                      |                                                                                                                         |         |                        |       |
| Informasjon                                                                                                                          | [Type= diskret] [Format=numeric] [Rekkevidde= 1-2] [Missing=*]                                                          |         |                        |       |
| Statistikk [NW/ W]                                                                                                                   | [Gyldige=4689 /-] [Ugyldig=0 /-]                                                                                        |         |                        |       |
| Spørsmålstekst                                                                                                                       | Har du det siste året deltatt i protestaksjoner eller demonstrasjoner i et forsøk på å få til forbedringer i samfunnet? |         |                        |       |
| Instruksjoner til intervjueren                                                                                                       | [Spurt hvis u=1. ]                                                                                                      |         |                        |       |
| Kommentarer                                                                                                                          | Har du det siste året deltatt i protestaksjoner eller demonstrasjoner i et forsøk på å få til forbedringer i samfunn    |         |                        |       |
| Verdi                                                                                                                                | Merkelapp                                                                                                               | Enheter | Prosent                |       |
| 1                                                                                                                                    | Ja                                                                                                                      | 116     | <div><div></div></div> | 2.5%  |
| 2                                                                                                                                    | Nei                                                                                                                     | 1036    | <div><div></div></div> | 22.1% |
| 97                                                                                                                                   | Ikke svart                                                                                                              | 32      | <div><div></div></div> | 0.7%  |
| 98                                                                                                                                   | Ikke spurt                                                                                                              | 3505    | <div><div></div></div> | 74.7% |
| Advarsel: disse tallene indikerer antall enheter (cases) i datafilen. De kan ikke tolkes som oppsummert statistikk for populasjonen. |                                                                                                                         |         |                        |       |
| # r7fri15: Hvem arrangerte den siste aksjonen du deltok i?                                                                           |                                                                                                                         |         |                        |       |
| Informasjon                                                                                                                          | [Type= diskret] [Format=numeric] [Rekkevidde= 1-2] [Missing=*]                                                          |         |                        |       |
| Statistikk [NW/ W]                                                                                                                   | [Gyldige=4689 /-] [Ugyldig=0 /-]                                                                                        |         |                        |       |
| Spørsmålstekst                                                                                                                       | Om du tenker tilbake på den siste aksjonen eller demonstrasjonen du deltok i, hvem var det som arrangerte denne?        |         |                        |       |
| Instruksjoner til intervjueren                                                                                                       | [Spurt hvis u=1 og R7FRI14=1. ]                                                                                         |         |                        |       |
| Kommentarer                                                                                                                          | Om du tenker tilbake på den siste aksjonen eller demonstrasjonen du deltok i, hvem var det som arrangerte denne?        |         |                        |       |
| Verdi                                                                                                                                | Merkelapp                                                                                                               | Enheter | Prosent                |       |
| 1                                                                                                                                    | En frivillig organisasjon, forening eller parti                                                                         | 76      | <div><div></div></div> | 1.6%  |
| 2                                                                                                                                    | Enkeltpersoner eller en ikke-organisert gruppe eller nettverk                                                           | 39      | <div><div></div></div> | 0.8%  |
| 97                                                                                                                                   | Ikke svart                                                                                                              | 1       | <div><div></div></div> | 0.0%  |
| 98                                                                                                                                   | Ikke spurt                                                                                                              | 4573    | <div><div></div></div> | 97.5% |
| Advarsel: disse tallene indikerer antall enheter (cases) i datafilen. De kan ikke tolkes som oppsummert statistikk for populasjonen. |                                                                                                                         |         |                        |       |
| # r7fri16: Hvilken type organisasjon/forening/parti var dette?                                                                       |                                                                                                                         |         |                        |       |
| Informasjon                                                                                                                          | [Type= diskret] [Format=numeric] [Rekkevidde= 1-16] [Missing=*]                                                         |         |                        |       |
| Statistikk [NW/ W]                                                                                                                   | [Gyldige=4689 /-] [Ugyldig=0 /-]                                                                                        |         |                        |       |
| Spørsmålstekst                                                                                                                       | Hvilken type organisasjon, forening eller parti var dette?                                                              |         |                        |       |
| Instruksjoner til intervjueren                                                                                                       | [Spurt hvis u=1 og R7FRI15=1. ]                                                                                         |         |                        |       |
| Verdi                                                                                                                                | Merkelapp                                                                                                               | Enheter | Prosent                |       |
| 1                                                                                                                                    | Kunst og kultur, korps og kor                                                                                           | 7       | <div><div></div></div> | 0.1%  |
| 2                                                                                                                                    | Idrett og sport                                                                                                         | 1       | <div><div></div></div> | 0.0%  |
| 3                                                                                                                                    | Hobby, fritid, utendørsaktivitet                                                                                        | 0       | <div><div></div></div> |       |
| 4                                                                                                                                    | Utdanning, opplæring og forskning                                                                                       | 1       | <div><div></div></div> | 0.0%  |

| # r7fri16: Hvilken type organisasjon/forening/parti var dette?                                                                       |                                                                                 |         |         |
|--------------------------------------------------------------------------------------------------------------------------------------|---------------------------------------------------------------------------------|---------|---------|
| Verdi                                                                                                                                | Merkelapp                                                                       | Enheter | Prosent |
| 5                                                                                                                                    | Helse, pleie og redningsarbeid                                                  | 2       | 0.0%    |
| 6                                                                                                                                    | Sosiale tjenester og rusmiddelomsorg                                            | 2       | 0.0%    |
| 7                                                                                                                                    | Natur-, miljø- og dyrevern                                                      | 19      | 0.4%    |
| 8                                                                                                                                    | Velforeninger, grendelag og nærmiljø                                            | 2       | 0.0%    |
| 9                                                                                                                                    | Borettslag og boligbyggelag                                                     | 0       |         |
| 10                                                                                                                                   | Rettighets-, støtte- og påvirkningsarbeid                                       | 6       | 0.1%    |
| 11                                                                                                                                   | Politiske partier                                                               | 12      | 0.3%    |
| 12                                                                                                                                   | Internasjonal utveksling, nødhjelp, bistand og menneskerettighetsarbeid         | 9       | 0.2%    |
| 13                                                                                                                                   | Yrkes-, bransje- og fagforeninger                                               | 7       | 0.1%    |
| 14                                                                                                                                   | Religion og livssyn inkludert den norske kirke                                  | 1       | 0.0%    |
| 15                                                                                                                                   | Innvandrerorganisasjoner                                                        | 3       | 0.1%    |
| 16                                                                                                                                   | Annet, spesifiser                                                               | 4       | 0.1%    |
| 97                                                                                                                                   | Ikke svart                                                                      | 0       |         |
| 98                                                                                                                                   | Ikke spurt                                                                      | 4613    | 98.4%   |
| Advarsel: disse tallene indikerer antall enheter (cases) i datafilen. De kan ikke tolkes som oppsummert statistikk for populasjonen. |                                                                                 |         |         |
| # r7fri16_16_other: Hvilken type organisasjon/forening/parti var dette? Annet [anonymisert]                                          |                                                                                 |         |         |
| Informasjon                                                                                                                          | [Type= diskret] [Format=character] [Missing=*]                                  |         |         |
| Statistikk [NW/ W]                                                                                                                   | [Gyldige=4689 /-] [Ugyldig=0 /-]                                                |         |         |
| Spørsmålstekst                                                                                                                       | Hvilken type organisasjon, forening eller parti var dette?                      |         |         |
| Instruksjoner til intervjueren                                                                                                       | [Spurt hvis u=1 og R7FRI15=1. ]<br>[Data tilbakeholdt av hensyn til anonymitet] |         |         |
| Verdi                                                                                                                                | Merkelapp                                                                       | Enheter | Prosent |
|                                                                                                                                      |                                                                                 | 4689    | 100.0%  |
| 97                                                                                                                                   | Ikke svart                                                                      | 0       |         |
| 98                                                                                                                                   | Ikke spurt                                                                      | 0       |         |
| Advarsel: disse tallene indikerer antall enheter (cases) i datafilen. De kan ikke tolkes som oppsummert statistikk for populasjonen. |                                                                                 |         |         |
| # r7fri17: Hvordan fikk du først høre om denne aksjonen?                                                                             |                                                                                 |         |         |
| Informasjon                                                                                                                          | [Type= diskret] [Format=numeric] [Rekkevidde= 1-5] [Missing=*]                  |         |         |
| Statistikk [NW/ W]                                                                                                                   | [Gyldige=4689 /-] [Ugyldig=0 /-]                                                |         |         |
| Spørsmålstekst                                                                                                                       | Hvordan fikk du først høre om denne aksjonen?                                   |         |         |
| Instruksjoner til intervjueren                                                                                                       | [Spurt hvis u=1 og R7FRI14=1. ]                                                 |         |         |
| Verdi                                                                                                                                | Merkelapp                                                                       | Enheter | Prosent |
| 1                                                                                                                                    | Gjennom organisasjon, forening eller parti som jeg er medlem i                  | 25      | 0.5%    |
| 2                                                                                                                                    | Gjennom kolleger på jobb eller medstudenter                                     | 3       | 0.1%    |
| 3                                                                                                                                    | Gjennom sosialt nettverk, venner og bekjente                                    | 54      | 1.2%    |
| 4                                                                                                                                    | Gjennom media                                                                   | 28      | 0.6%    |
| 5                                                                                                                                    | På andre måter                                                                  | 5       | 0.1%    |
| 97                                                                                                                                   | Ikke svart                                                                      | 1       | 0.0%    |
| 98                                                                                                                                   | Ikke spurt                                                                      | 4573    | 97.5%   |
| Advarsel: disse tallene indikerer antall enheter (cases) i datafilen. De kan ikke tolkes som oppsummert statistikk for populasjonen. |                                                                                 |         |         |

| # r7fri18: Måten du først fikk høre om aksjon                                                                                        |                                                                                                                         |         |         |
|--------------------------------------------------------------------------------------------------------------------------------------|-------------------------------------------------------------------------------------------------------------------------|---------|---------|
| Informasjon                                                                                                                          | [Type= diskret] [Format=numeric] [Rekkevidde= 1-11] [Missing=*]                                                         |         |         |
| Statistikk [NW/ W]                                                                                                                   | [Gyldige=4689 /-] [Ugyldig=0 /-]                                                                                        |         |         |
| Spørsmålstekst                                                                                                                       | På hvilken måte fikk du først høre om denne aksjonen?                                                                   |         |         |
| Instruksjoner til intervjueren                                                                                                       | [Spurt hvis u=1 og R7FRI14=1. ]                                                                                         |         |         |
| Verdi                                                                                                                                | Merkelapp                                                                                                               | Enheter | Prosent |
| 1                                                                                                                                    | Samtale ansikt til ansikt                                                                                               | 15      | 0.3%    |
| 2                                                                                                                                    | Telefonsamtale                                                                                                          | 3       | 0.1%    |
| 3                                                                                                                                    | SMS                                                                                                                     | 3       | 0.1%    |
| 4                                                                                                                                    | Plakater/oppslag                                                                                                        | 1       | 0.0%    |
| 5                                                                                                                                    | Papiravis/magasin/blad                                                                                                  | 6       | 0.1%    |
| 6                                                                                                                                    | Nettavis                                                                                                                | 4       | 0.1%    |
| 7                                                                                                                                    | E-post                                                                                                                  | 13      | 0.3%    |
| 8                                                                                                                                    | Facebook                                                                                                                | 59      | 1.3%    |
| 9                                                                                                                                    | Andre sosiale media                                                                                                     | 3       | 0.1%    |
| 10                                                                                                                                   | TV/radio                                                                                                                | 3       | 0.1%    |
| 11                                                                                                                                   | Annet                                                                                                                   | 4       | 0.1%    |
| 97                                                                                                                                   | Ikke svart                                                                                                              | 2       | 0.0%    |
| 98                                                                                                                                   | Ikke spurt                                                                                                              | 4573    | 97.5%   |
| Advarsel: disse tallene indikerer antall enheter (cases) i datafilen. De kan ikke tolkes som oppsummert statistikk for populasjonen. |                                                                                                                         |         |         |
| # r7km2: Bekymring for klimaendringer                                                                                                |                                                                                                                         |         |         |
| Informasjon                                                                                                                          | [Type= diskret] [Format=numeric] [Rekkevidde= 1-5] [Missing=*]                                                          |         |         |
| Statistikk [NW/ W]                                                                                                                   | [Gyldige=4689 /-] [Ugyldig=0 /-]                                                                                        |         |         |
| Spørsmålstekst                                                                                                                       | Hvor bekymret er du for klimaendringer?                                                                                 |         |         |
| Instruksjoner til intervjueren                                                                                                       | [Spurt hvis u=2. ]                                                                                                      |         |         |
| Verdi                                                                                                                                | Merkelapp                                                                                                               | Enheter | Prosent |
| 1                                                                                                                                    | Svært bekymret                                                                                                          | 149     | 3.2%    |
| 2                                                                                                                                    | Bekymret                                                                                                                | 418     | 8.9%    |
| 3                                                                                                                                    | Noe bekymret                                                                                                            | 382     | 8.1%    |
| 4                                                                                                                                    | Lite bekymret                                                                                                           | 190     | 4.1%    |
| 5                                                                                                                                    | Ikke bekymret i det hele tatt                                                                                           | 44      | 0.9%    |
| 97                                                                                                                                   | Ikke svart                                                                                                              | 16      | 0.3%    |
| 98                                                                                                                                   | Ikke spurt                                                                                                              | 3490    | 74.4%   |
| Advarsel: disse tallene indikerer antall enheter (cases) i datafilen. De kan ikke tolkes som oppsummert statistikk for populasjonen. |                                                                                                                         |         |         |
| # r7km3_2: Positiv/negativ til: Innskjerpe reglene for hvor mye CO2 industrien i Norge og Europa får slippe ut                       |                                                                                                                         |         |         |
| Informasjon                                                                                                                          | [Type= diskret] [Format=numeric] [Rekkevidde= 1-7] [Missing=*]                                                          |         |         |
| Statistikk [NW/ W]                                                                                                                   | [Gyldige=4689 /-] [Ugyldig=0 /-]                                                                                        |         |         |
| Tekst før spørsmål                                                                                                                   | Hvor positiv eller negativ er du til følgende tiltak:                                                                   |         |         |
| Spørsmålstekst                                                                                                                       | Innskjerpe reglene for hvor mye CO2 industrien i Norge og Europa får slippe ut.                                         |         |         |
| Instruksjoner til intervjueren                                                                                                       | [Spurt hvis u=2. ]                                                                                                      |         |         |
| Kommentarer                                                                                                                          | Innskjerpe reglene for hvor mye CO2 industrien i Norge og Europa får slippe ut. (Hvor positiv eller negativ er du til f |         |         |

### # r7km3\_2: Positiv/negativ til: Innskjerpe reglene for hvor mye CO2 industrien i Norge og Europa får slippe ut

| Verdi | Merkelapp                    | Enheter | Prosent                      |
|-------|------------------------------|---------|------------------------------|
| 1     | Svært positiv                | 232     | <div><div></div></div> 4.9%  |
| 2     | Positiv                      | 464     | <div><div></div></div> 9.9%  |
| 3     | Noe positiv                  | 258     | <div><div></div></div> 5.5%  |
| 4     | Verken positiv eller negativ | 150     | <div><div></div></div> 3.2%  |
| 5     | Noe negativ                  | 31      | <div><div></div></div> 0.7%  |
| 6     | Negativ                      | 24      | <div><div></div></div> 0.5%  |
| 7     | Svært negativ                | 12      | <div><div></div></div> 0.3%  |
| 97    | Ikke svart                   | 28      | <div><div></div></div> 0.6%  |
| 98    | Ikke spurt                   | 3490    | <div><div></div></div> 74.4% |

Advarsel: disse tallene indikerer antall enheter (cases) i datafilen. De kan ikke tolkes som oppsummert statistikk for populasjonen.

### # r7km3\_3: Positiv/negativ til: Lagring av CO2 under havbunn/jordoverflaten

|                                       |                                                                                                                          |
|---------------------------------------|--------------------------------------------------------------------------------------------------------------------------|
| <b>Informasjon</b>                    | [Type= diskret] [Format=numeric] [Rekkevidde= 1-7] [Missing=*]                                                           |
| <b>Statistikk [NW/ W]</b>             | [Gyldige=4689 /-] [Ugyldig=0 /-]                                                                                         |
| <b>Tekst før spørsmål</b>             | Hvor positiv eller negativ er du til følgende tiltak:                                                                    |
| <b>Spørsmålstekst</b>                 | Satse sterkere på fangst og lagring av CO2 under havbunnen eller jordoverflaten.                                         |
| <b>Instruksjoner til intervjueren</b> | [Spurt hvis u=2. ]                                                                                                       |
| <b>Kommentarer</b>                    | Satse sterkere på fangst og lagring av CO2 under havbunnen eller jordoverflaten. (Hvor positiv eller negativ er du til f |

| Verdi | Merkelapp                    | Enheter | Prosent                      |
|-------|------------------------------|---------|------------------------------|
| 1     | Svært positiv                | 98      | <div><div></div></div> 2.1%  |
| 2     | Positiv                      | 256     | <div><div></div></div> 5.5%  |
| 3     | Noe positiv                  | 252     | <div><div></div></div> 5.4%  |
| 4     | Verken positiv eller negativ | 371     | <div><div></div></div> 7.9%  |
| 5     | Noe negativ                  | 106     | <div><div></div></div> 2.3%  |
| 6     | Negativ                      | 53      | <div><div></div></div> 1.1%  |
| 7     | Svært negativ                | 29      | <div><div></div></div> 0.6%  |
| 97    | Ikke svart                   | 34      | <div><div></div></div> 0.7%  |
| 98    | Ikke spurt                   | 3490    | <div><div></div></div> 74.4% |

Advarsel: disse tallene indikerer antall enheter (cases) i datafilen. De kan ikke tolkes som oppsummert statistikk for populasjonen.

### # r7km3\_4: Positiv/negativ til: Økt støtte til fornybar energi

|                                       |                                                                                                                       |
|---------------------------------------|-----------------------------------------------------------------------------------------------------------------------|
| <b>Informasjon</b>                    | [Type= diskret] [Format=numeric] [Rekkevidde= 1-7] [Missing=*]                                                        |
| <b>Statistikk [NW/ W]</b>             | [Gyldige=4689 /-] [Ugyldig=0 /-]                                                                                      |
| <b>Tekst før spørsmål</b>             | Hvor positiv eller negativ er du til følgende tiltak:                                                                 |
| <b>Spørsmålstekst</b>                 | Øke støtten til forskning på og utbygging av fornybar energi.                                                         |
| <b>Instruksjoner til intervjueren</b> | [Spurt hvis u=2. ]                                                                                                    |
| <b>Kommentarer</b>                    | Øke støtten til forskning på og utbygging av fornybar energi. (Hvor positiv eller negativ er du til følgende tiltak:) |

| Verdi | Merkelapp                    | Enheter | Prosent                      |
|-------|------------------------------|---------|------------------------------|
| 1     | Svært positiv                | 582     | <div><div></div></div> 12.4% |
| 2     | Positiv                      | 407     | <div><div></div></div> 8.7%  |
| 3     | Noe positiv                  | 110     | <div><div></div></div> 2.3%  |
| 4     | Verken positiv eller negativ | 62      | <div><div></div></div> 1.3%  |
| 5     | Noe negativ                  | 8       | <div><div></div></div> 0.2%  |

| # r7km3_4: Positiv/negativ til: Økt støtte til fornybar energi                                                                       |                                                                                                                                                                                                                           |         |         |
|--------------------------------------------------------------------------------------------------------------------------------------|---------------------------------------------------------------------------------------------------------------------------------------------------------------------------------------------------------------------------|---------|---------|
| Verdi                                                                                                                                | Merkelapp                                                                                                                                                                                                                 | Enheter | Prosent |
| 6                                                                                                                                    | Negativ                                                                                                                                                                                                                   | 5       | 0.1%    |
| 7                                                                                                                                    | Svært negativ                                                                                                                                                                                                             | 2       | 0.0%    |
| 97                                                                                                                                   | Ikke svart                                                                                                                                                                                                                | 23      | 0.5%    |
| 98                                                                                                                                   | Ikke spurt                                                                                                                                                                                                                | 3490    | 74.4%   |
| Advarsel: disse tallene indikerer antall enheter (cases) i datafilen. De kan ikke tolkes som oppsummert statistikk for populasjonen. |                                                                                                                                                                                                                           |         |         |
| # r7km3_5: Positiv/negativ til: Skjerpe skattereglene for oljeleting norsk sokkel                                                    |                                                                                                                                                                                                                           |         |         |
| Informasjon                                                                                                                          | [Type= diskret] [Format=numeric] [Rekkevidde= 1-7] [Missing=*]                                                                                                                                                            |         |         |
| Statistikk [NW/ W]                                                                                                                   | [Gyldige=4689 /-] [Ugyldig=0 /-]                                                                                                                                                                                          |         |         |
| Tekst før spørsmål                                                                                                                   | Hvor positiv eller negativ er du til følgende tiltak:                                                                                                                                                                     |         |         |
| Spørsmålstekst                                                                                                                       | Skjerpe skattereglene for oljeleting på norsk sokkel                                                                                                                                                                      |         |         |
| Instruksjoner til intervjueren                                                                                                       | [Spurt hvis u=2. ]                                                                                                                                                                                                        |         |         |
| Kommentarer                                                                                                                          | Skjerpe skattereglene for oljeleting på norsk sokkel (Hvor positiv eller negativ er du til følgende tiltak:)                                                                                                              |         |         |
| Verdi                                                                                                                                | Merkelapp                                                                                                                                                                                                                 | Enheter | Prosent |
| 1                                                                                                                                    | Svært positiv                                                                                                                                                                                                             | 145     | 3.1%    |
| 2                                                                                                                                    | Positiv                                                                                                                                                                                                                   | 205     | 4.4%    |
| 3                                                                                                                                    | Noe positiv                                                                                                                                                                                                               | 203     | 4.3%    |
| 4                                                                                                                                    | Verken positiv eller negativ                                                                                                                                                                                              | 388     | 8.3%    |
| 5                                                                                                                                    | Noe negativ                                                                                                                                                                                                               | 96      | 2.0%    |
| 6                                                                                                                                    | Negativ                                                                                                                                                                                                                   | 94      | 2.0%    |
| 7                                                                                                                                    | Svært negativ                                                                                                                                                                                                             | 36      | 0.8%    |
| 97                                                                                                                                   | Ikke svart                                                                                                                                                                                                                | 32      | 0.7%    |
| 98                                                                                                                                   | Ikke spurt                                                                                                                                                                                                                | 3490    | 74.4%   |
| Advarsel: disse tallene indikerer antall enheter (cases) i datafilen. De kan ikke tolkes som oppsummert statistikk for populasjonen. |                                                                                                                                                                                                                           |         |         |
| # r7km4: Diskusjon om bilpark, utsagn nærmest ditt syn                                                                               |                                                                                                                                                                                                                           |         |         |
| Informasjon                                                                                                                          | [Type= diskret] [Format=numeric] [Rekkevidde= 1-2] [Missing=*]                                                                                                                                                            |         |         |
| Statistikk [NW/ W]                                                                                                                   | [Gyldige=4689 /-] [Ugyldig=0 /-]                                                                                                                                                                                          |         |         |
| Tekst før spørsmål                                                                                                                   | Partiene på Stortinget diskuterer nå et forslag om at alle nye personbiler fra 2025 skal være elektriske eller bruke hydrogen. Blir forslaget vedtatt, vil man ikke kunne kjøpe nye bensin- eller dieslbiler fra 2025 av. |         |         |
| Spørsmålstekst                                                                                                                       | Hvilket av utsagnene nedenfor kommer nærmest ditt syn:                                                                                                                                                                    |         |         |
| Instruksjoner til intervjueren                                                                                                       | [Spurt hvis u=2. ]                                                                                                                                                                                                        |         |         |
| Kommentarer                                                                                                                          | Partiene på Stortinget diskuterer nå et forslag om at alle nye personbiler fra 2025 skal være elektriske eller bruke h                                                                                                    |         |         |
| Verdi                                                                                                                                | Merkelapp                                                                                                                                                                                                                 | Enheter | Prosent |
| 1                                                                                                                                    | I 2025 bør alle nye personbiler som selges gå på elektrisitet eller hydrogen                                                                                                                                              | 468     | 10.0%   |
| 2                                                                                                                                    | I 2025 bør det fremdeles være anledning til å kjøpe nye personbiler som går på diesel og bensin.                                                                                                                          | 702     | 15.0%   |
| 97                                                                                                                                   | Ikke svart                                                                                                                                                                                                                | 29      | 0.6%    |
| 98                                                                                                                                   | Ikke spurt                                                                                                                                                                                                                | 3490    | 74.4%   |
| Advarsel: disse tallene indikerer antall enheter (cases) i datafilen. De kan ikke tolkes som oppsummert statistikk for populasjonen. |                                                                                                                                                                                                                           |         |         |
| # r7km4_comment: Ytterligere kommentarer [anonymisert]                                                                               |                                                                                                                                                                                                                           |         |         |
| Informasjon                                                                                                                          | [Type= diskret] [Format=character] [Missing=*]                                                                                                                                                                            |         |         |
| Statistikk [NW/ W]                                                                                                                   | [Gyldige=4689 /-] [Ugyldig=0 /-]                                                                                                                                                                                          |         |         |

| # r7km4_comment: Ytterligere kommentarer [anonymisert]                                                                               |                                                                                                                        |         |                    |
|--------------------------------------------------------------------------------------------------------------------------------------|------------------------------------------------------------------------------------------------------------------------|---------|--------------------|
| Spørsmålstekst                                                                                                                       | Om du har ytterligere kommentarer, kan du skrive dem inn her:                                                          |         |                    |
| Instruksjoner til intervjueren                                                                                                       | [Spurt hvis u=2. ]<br><br>[Data tilbakeholdt av hensyn til anonymitet]                                                 |         |                    |
| Verdi                                                                                                                                | Merkelapp                                                                                                              | Enheter | Prosent            |
|                                                                                                                                      |                                                                                                                        | 4689    | <div></div> 100.0% |
| Advarsel: disse tallene indikerer antall enheter (cases) i datafilen. De kan ikke tolkes som oppsummert statistikk for populasjonen. |                                                                                                                        |         |                    |
| # r7km5_1: Utsagn: Teknologiske nyvinninger vil løse klimaproblemene                                                                 |                                                                                                                        |         |                    |
| Informasjon                                                                                                                          | [Type= diskret] [Format=numeric] [Rekkevidde= 1-7] [Missing=*]                                                         |         |                    |
| Statistikk [NW/ W]                                                                                                                   | [Gyldige=4689 /-] [Ugyldig=0 /-]                                                                                       |         |                    |
| Tekst før spørsmål                                                                                                                   | Se på utsagnene nedenfor. I hvor stor grad er du enig eller uenig i dem?                                               |         |                    |
| Spørsmålstekst                                                                                                                       | Teknologiske nyvinninger kommer til å løse klimaproblemene.                                                            |         |                    |
| Instruksjoner til intervjueren                                                                                                       | [Spurt hvis u=2. ]                                                                                                     |         |                    |
| Kommentarer                                                                                                                          | Teknologiske nyvinninger kommer til å løse klimaproblemene. (Se på utsagnene nedenfor. I hvor stor grad er du enig ell |         |                    |
| Verdi                                                                                                                                | Merkelapp                                                                                                              | Enheter | Prosent            |
| 1                                                                                                                                    | Svært enig                                                                                                             | 46      | <div></div> 1.0%   |
| 2                                                                                                                                    | Enig                                                                                                                   | 209     | <div></div> 4.5%   |
| 3                                                                                                                                    | Noe enig                                                                                                               | 429     | <div></div> 9.1%   |
| 4                                                                                                                                    | Verken enig eller uenig                                                                                                | 222     | <div></div> 4.7%   |
| 5                                                                                                                                    | Noe uenig                                                                                                              | 150     | <div></div> 3.2%   |
| 6                                                                                                                                    | Uenig                                                                                                                  | 88      | <div></div> 1.9%   |
| 7                                                                                                                                    | Svært uenig                                                                                                            | 27      | <div></div> 0.6%   |
| 97                                                                                                                                   | Ikke svart                                                                                                             | 28      | <div></div> 0.6%   |
| 98                                                                                                                                   | Ikke spurt                                                                                                             | 3490    | <div></div> 74.4%  |
| Advarsel: disse tallene indikerer antall enheter (cases) i datafilen. De kan ikke tolkes som oppsummert statistikk for populasjonen. |                                                                                                                        |         |                    |
| # r7km5_2: Utsagn: Innbyggere i rike land bør redusere sitt forbruk                                                                  |                                                                                                                        |         |                    |
| Informasjon                                                                                                                          | [Type= diskret] [Format=numeric] [Rekkevidde= 1-7] [Missing=*]                                                         |         |                    |
| Statistikk [NW/ W]                                                                                                                   | [Gyldige=4689 /-] [Ugyldig=0 /-]                                                                                       |         |                    |
| Tekst før spørsmål                                                                                                                   | Se på utsagnene nedenfor. I hvor stor grad er du enig eller uenig i dem?                                               |         |                    |
| Spørsmålstekst                                                                                                                       | Innbyggere i rike land som Norge bør redusere forbruket sitt som en del av løsningen på klimautfordringen.             |         |                    |
| Instruksjoner til intervjueren                                                                                                       | [Spurt hvis u=2. ]                                                                                                     |         |                    |
| Kommentarer                                                                                                                          | Innbyggere i rike land som Norge bør redusere forbruket sitt som en del av løsningen på klimautfordringen. (Se på ut   |         |                    |
| Verdi                                                                                                                                | Merkelapp                                                                                                              | Enheter | Prosent            |
| 1                                                                                                                                    | Svært enig                                                                                                             | 220     | <div></div> 4.7%   |
| 2                                                                                                                                    | Enig                                                                                                                   | 343     | <div></div> 7.3%   |
| 3                                                                                                                                    | Noe enig                                                                                                               | 339     | <div></div> 7.2%   |
| 4                                                                                                                                    | Verken enig eller uenig                                                                                                | 109     | <div></div> 2.3%   |
| 5                                                                                                                                    | Noe uenig                                                                                                              | 80      | <div></div> 1.7%   |
| 6                                                                                                                                    | Uenig                                                                                                                  | 51      | <div></div> 1.1%   |
| 7                                                                                                                                    | Svært uenig                                                                                                            | 34      | <div></div> 0.7%   |
| 97                                                                                                                                   | Ikke svart                                                                                                             | 23      | <div></div> 0.5%   |
| 98                                                                                                                                   | Ikke spurt                                                                                                             | 3490    | <div></div> 74.4%  |
| Advarsel: disse tallene indikerer antall enheter (cases) i datafilen. De kan ikke tolkes som oppsummert statistikk for populasjonen. |                                                                                                                        |         |                    |

| # r7km6: I hvor stor grad mulig å forhindre skadelige klimaendringer, utsagn nærmest ditt syn                                        |                                                                                                                                                                                                                                                                 |         |             |       |
|--------------------------------------------------------------------------------------------------------------------------------------|-----------------------------------------------------------------------------------------------------------------------------------------------------------------------------------------------------------------------------------------------------------------|---------|-------------|-------|
| Informasjon                                                                                                                          | [Type= diskret] [Format=numeric] [Rekkevidde= 1-4] [Missing=*]                                                                                                                                                                                                  |         |             |       |
| Statistikk [NW/ W]                                                                                                                   | [Gyldige=4689 /-] [Ugyldig=0 /-]                                                                                                                                                                                                                                |         |             |       |
| Tekst før spørsmål                                                                                                                   | La oss forutsette at klimaendringer kan bli et stort problem for verden i fremtiden dersom ingenting gjøres med dem. I hvor stor grad tror du det er mulig å forhindre skadelige klimaendringer?                                                                |         |             |       |
| Spørsmålstekst                                                                                                                       | Velg det utsagnet som kommer nærmest ditt syn:                                                                                                                                                                                                                  |         |             |       |
| Instruksjoner til intervjueren                                                                                                       | [Spurt hvis u=2. ]                                                                                                                                                                                                                                              |         |             |       |
| Kommentarer                                                                                                                          | La oss forutsette at klimaendringer kan bli et stort problem for verden i fremtiden dersom ingenting gjøres med dem. I h                                                                                                                                        |         |             |       |
| Verdi                                                                                                                                | Merkelapp                                                                                                                                                                                                                                                       | Enheter | Prosent     |       |
| 1                                                                                                                                    | Det er umulig å forhindre skadelige klimaendringer.                                                                                                                                                                                                             | 106     | <div></div> | 2.3%  |
| 2                                                                                                                                    | Det er mulig, men svært vanskelig, å forhindre skadelige klimaendringer.                                                                                                                                                                                        | 812     | <div></div> | 17.3% |
| 3                                                                                                                                    | Det er mulig og helt realistisk å forhindre skadelige klimaendringer.                                                                                                                                                                                           | 245     | <div></div> | 5.2%  |
| 4                                                                                                                                    | Det er enkelt å forhindre skadelige klimaendringer.                                                                                                                                                                                                             | 5       | <div></div> | 0.1%  |
| 97                                                                                                                                   | Ikke svart                                                                                                                                                                                                                                                      | 31      | <div></div> | 0.7%  |
| 98                                                                                                                                   | Ikke spurt                                                                                                                                                                                                                                                      | 3490    | <div></div> | 74.4% |
| Advarsel: disse tallene indikerer antall enheter (cases) i datafilen. De kan ikke tolkes som oppsummert statistikk for populasjonen. |                                                                                                                                                                                                                                                                 |         |             |       |
| # r7km7_1: Hvordan bør din kommune prioritere bruken av areal til matproduksjon neste ti år: Boliger                                 |                                                                                                                                                                                                                                                                 |         |             |       |
| Informasjon                                                                                                                          | [Type= diskret] [Format=numeric] [Missing=*]                                                                                                                                                                                                                    |         |             |       |
| Statistikk [NW/ W]                                                                                                                   | [Gyldige=4022 /-] [Ugyldig=667 /-]                                                                                                                                                                                                                              |         |             |       |
| Tekst før spørsmål                                                                                                                   | Politikerne må ofte velge om arealer som kan benyttes til matproduksjon skal brukes til andre nødvendige formål. Hvordan synes du din kommune bør prioritere bruken av slikt areal de neste ti årene?<br>Ranger inntil tre alternativer der 1 er det viktigste: |         |             |       |
| Spørsmålstekst                                                                                                                       | Boliger                                                                                                                                                                                                                                                         |         |             |       |
| Instruksjoner til intervjueren                                                                                                       | [Spurt hvis u=2. ]                                                                                                                                                                                                                                              |         |             |       |
| Kommentarer                                                                                                                          | Boliger (Politikerne må ofte velge om arealer som kan benyttes til matproduksjon skal brukes til andre nødvendige form                                                                                                                                          |         |             |       |
| Verdi                                                                                                                                | Merkelapp                                                                                                                                                                                                                                                       | Enheter | Prosent     |       |
| 1                                                                                                                                    |                                                                                                                                                                                                                                                                 | 151     | <div></div> | 3.8%  |
| 2                                                                                                                                    |                                                                                                                                                                                                                                                                 | 194     | <div></div> | 4.8%  |
| 3                                                                                                                                    |                                                                                                                                                                                                                                                                 | 187     | <div></div> | 4.6%  |
| 97                                                                                                                                   | Ikke svart                                                                                                                                                                                                                                                      | 0       | <div></div> |       |
| 98                                                                                                                                   | Ikke spurt                                                                                                                                                                                                                                                      | 3490    | <div></div> | 86.8% |
| Sysmiss                                                                                                                              |                                                                                                                                                                                                                                                                 | 667     | <div></div> |       |
| Advarsel: disse tallene indikerer antall enheter (cases) i datafilen. De kan ikke tolkes som oppsummert statistikk for populasjonen. |                                                                                                                                                                                                                                                                 |         |             |       |
| # r7km7_2: Hvordan bør din kommune prioritere bruken av areal til matproduksjon neste ti år: Vei                                     |                                                                                                                                                                                                                                                                 |         |             |       |
| Informasjon                                                                                                                          | [Type= diskret] [Format=numeric] [Missing=*]                                                                                                                                                                                                                    |         |             |       |
| Statistikk [NW/ W]                                                                                                                   | [Gyldige=3838 /-] [Ugyldig=851 /-]                                                                                                                                                                                                                              |         |             |       |
| Tekst før spørsmål                                                                                                                   | Politikerne må ofte velge om arealer som kan benyttes til matproduksjon skal brukes til andre nødvendige formål. Hvordan synes du din kommune bør prioritere bruken av slikt areal de neste ti årene?<br>Ranger inntil tre alternativer der 1 er det viktigste: |         |             |       |
| Spørsmålstekst                                                                                                                       | Vei                                                                                                                                                                                                                                                             |         |             |       |
| Instruksjoner til intervjueren                                                                                                       | [Spurt hvis u=2. ]                                                                                                                                                                                                                                              |         |             |       |
| Kommentarer                                                                                                                          | Vei (Politikerne må ofte velge om arealer som kan benyttes til matproduksjon skal brukes til andre nødvendige formål.                                                                                                                                           |         |             |       |



| # r7km7_2: Hvordan bør din kommune prioritere bruken av areal til matproduksjon neste ti år: Vei                                     |                                                                                                                                                                                                                                                                 |         |                              |
|--------------------------------------------------------------------------------------------------------------------------------------|-----------------------------------------------------------------------------------------------------------------------------------------------------------------------------------------------------------------------------------------------------------------|---------|------------------------------|
| Verdi                                                                                                                                | Merkelapp                                                                                                                                                                                                                                                       | Enheter | Prosent                      |
| 1                                                                                                                                    |                                                                                                                                                                                                                                                                 | 71      | <div><div></div></div> 1.8%  |
| 2                                                                                                                                    |                                                                                                                                                                                                                                                                 | 111     | <div><div></div></div> 2.9%  |
| 3                                                                                                                                    |                                                                                                                                                                                                                                                                 | 166     | <div><div></div></div> 4.3%  |
| 97                                                                                                                                   | Ikke svart                                                                                                                                                                                                                                                      | 0       |                              |
| 98                                                                                                                                   | Ikke spurt                                                                                                                                                                                                                                                      | 3490    | <div><div></div></div> 90.9% |
| Sysmiss                                                                                                                              |                                                                                                                                                                                                                                                                 | 851     |                              |
| Advarsel: disse tallene indikerer antall enheter (cases) i datafilen. De kan ikke tolkes som oppsummert statistikk for populasjonen. |                                                                                                                                                                                                                                                                 |         |                              |
| # r7km7_3: Hvordan bør din kommune prioritere bruken av areal til matproduksjon neste ti år: Matproduksjon                           |                                                                                                                                                                                                                                                                 |         |                              |
| Informasjon                                                                                                                          | [Type= diskret] [Format=numeric] [Missing=*]                                                                                                                                                                                                                    |         |                              |
| Statistikk [NW/ W]                                                                                                                   | [Gyldige=4253 /-] [Ugyldig=436 /-]                                                                                                                                                                                                                              |         |                              |
| Tekst før spørsmål                                                                                                                   | Politikerne må ofte velge om arealer som kan benyttes til matproduksjon skal brukes til andre nødvendige formål. Hvordan synes du din kommune bør prioritere bruken av slikt areal de neste ti årene?<br>Ranger inntil tre alternativer der 1 er det viktigste: |         |                              |
| Spørsmålstekst                                                                                                                       | Matproduksjon                                                                                                                                                                                                                                                   |         |                              |
| Instruksjoner til intervjueren                                                                                                       | [Spurt hvis u=2. ]                                                                                                                                                                                                                                              |         |                              |
| Kommentarer                                                                                                                          | Matproduksjon (Politikerne må ofte velge om arealer som kan benyttes til matproduksjon skal brukes til andre nødvendige                                                                                                                                         |         |                              |
| Verdi                                                                                                                                | Merkelapp                                                                                                                                                                                                                                                       | Enheter | Prosent                      |
| 1                                                                                                                                    |                                                                                                                                                                                                                                                                 | 541     | <div><div></div></div> 12.7% |
| 2                                                                                                                                    |                                                                                                                                                                                                                                                                 | 125     | <div><div></div></div> 2.9%  |
| 3                                                                                                                                    |                                                                                                                                                                                                                                                                 | 97      | <div><div></div></div> 2.3%  |
| 97                                                                                                                                   | Ikke svart                                                                                                                                                                                                                                                      | 0       |                              |
| 98                                                                                                                                   | Ikke spurt                                                                                                                                                                                                                                                      | 3490    | <div><div></div></div> 82.1% |
| Sysmiss                                                                                                                              |                                                                                                                                                                                                                                                                 | 436     |                              |
| Advarsel: disse tallene indikerer antall enheter (cases) i datafilen. De kan ikke tolkes som oppsummert statistikk for populasjonen. |                                                                                                                                                                                                                                                                 |         |                              |
| # r7km7_4: Hvordan bør din kommune prioritere bruken av areal til matproduksjon neste ti år: Jernbane/T-bane/bybane                  |                                                                                                                                                                                                                                                                 |         |                              |
| Informasjon                                                                                                                          | [Type= diskret] [Format=numeric] [Missing=*]                                                                                                                                                                                                                    |         |                              |
| Statistikk [NW/ W]                                                                                                                   | [Gyldige=4031 /-] [Ugyldig=658 /-]                                                                                                                                                                                                                              |         |                              |
| Tekst før spørsmål                                                                                                                   | Politikerne må ofte velge om arealer som kan benyttes til matproduksjon skal brukes til andre nødvendige formål. Hvordan synes du din kommune bør prioritere bruken av slikt areal de neste ti årene?<br>Ranger inntil tre alternativer der 1 er det viktigste: |         |                              |
| Spørsmålstekst                                                                                                                       | Jernbane/T-bane/bybane osv.                                                                                                                                                                                                                                     |         |                              |
| Instruksjoner til intervjueren                                                                                                       | [Spurt hvis u=2. ]                                                                                                                                                                                                                                              |         |                              |
| Kommentarer                                                                                                                          | Jernbane/T-bane/bybane osv. (Politikerne må ofte velge om arealer som kan benyttes til matproduksjon skal brukes til and                                                                                                                                        |         |                              |
| Verdi                                                                                                                                | Merkelapp                                                                                                                                                                                                                                                       | Enheter | Prosent                      |
| 1                                                                                                                                    |                                                                                                                                                                                                                                                                 | 150     | <div><div></div></div> 3.7%  |
| 2                                                                                                                                    |                                                                                                                                                                                                                                                                 | 226     | <div><div></div></div> 5.6%  |
| 3                                                                                                                                    |                                                                                                                                                                                                                                                                 | 165     | <div><div></div></div> 4.1%  |
| 97                                                                                                                                   | Ikke svart                                                                                                                                                                                                                                                      | 0       |                              |
| 98                                                                                                                                   | Ikke spurt                                                                                                                                                                                                                                                      | 3490    | <div><div></div></div> 86.6% |
| Sysmiss                                                                                                                              |                                                                                                                                                                                                                                                                 | 658     |                              |
| Advarsel: disse tallene indikerer antall enheter (cases) i datafilen. De kan ikke tolkes som oppsummert statistikk for populasjonen. |                                                                                                                                                                                                                                                                 |         |                              |

| # r7km7_5: Hvordan bør din kommune prioritere bruken av areal til matproduksjon neste ti år: Næringsvirksomhet                       |                                                                                                                                                                                                                                                                 |         |                              |
|--------------------------------------------------------------------------------------------------------------------------------------|-----------------------------------------------------------------------------------------------------------------------------------------------------------------------------------------------------------------------------------------------------------------|---------|------------------------------|
| Informasjon                                                                                                                          | [Type= diskret] [Format=numeric] [Missing=*]                                                                                                                                                                                                                    |         |                              |
| Statistikk [NW/ W]                                                                                                                   | [Gyldige=3919 /-] [Ugyldig=770 /-]                                                                                                                                                                                                                              |         |                              |
| Tekst før spørsmål                                                                                                                   | Politikerne må ofte velge om arealer som kan benyttes til matproduksjon skal brukes til andre nødvendige formål. Hvordan synes du din kommune bør prioritere bruken av slikt areal de neste ti årene?<br>Ranger inntil tre alternativer der 1 er det viktigste: |         |                              |
| Spørsmålstekst                                                                                                                       | Næringsvirksomhet                                                                                                                                                                                                                                               |         |                              |
| Instruksjoner til intervjueren                                                                                                       | [Spurt hvis u=2. ]                                                                                                                                                                                                                                              |         |                              |
| Kommentarer                                                                                                                          | Næringsvirksomhet (Politikerne må ofte velge om arealer som kan benyttes til matproduksjon skal brukes til andre nødve                                                                                                                                          |         |                              |
| Verdi                                                                                                                                | Merkelapp                                                                                                                                                                                                                                                       | Enheter | Prosent                      |
| 1                                                                                                                                    |                                                                                                                                                                                                                                                                 | 89      | <div><div></div></div> 2.3%  |
| 2                                                                                                                                    |                                                                                                                                                                                                                                                                 | 173     | <div><div></div></div> 4.4%  |
| 3                                                                                                                                    |                                                                                                                                                                                                                                                                 | 167     | <div><div></div></div> 4.3%  |
| 97                                                                                                                                   | Ikke svart                                                                                                                                                                                                                                                      | 0       |                              |
| 98                                                                                                                                   | Ikke spurt                                                                                                                                                                                                                                                      | 3490    | <div><div></div></div> 89.1% |
| Sysmiss                                                                                                                              |                                                                                                                                                                                                                                                                 | 770     |                              |
| Advarsel: disse tallene indikerer antall enheter (cases) i datafilen. De kan ikke tolkes som oppsummert statistikk for populasjonen. |                                                                                                                                                                                                                                                                 |         |                              |
| # r7km7_6: Hvordan bør din kommune prioritere bruken av areal til matproduksjon neste ti år: Offentlige bygg                         |                                                                                                                                                                                                                                                                 |         |                              |
| Informasjon                                                                                                                          | [Type= diskret] [Format=numeric] [Missing=*]                                                                                                                                                                                                                    |         |                              |
| Statistikk [NW/ W]                                                                                                                   | [Gyldige=4103 /-] [Ugyldig=586 /-]                                                                                                                                                                                                                              |         |                              |
| Tekst før spørsmål                                                                                                                   | Politikerne må ofte velge om arealer som kan benyttes til matproduksjon skal brukes til andre nødvendige formål. Hvordan synes du din kommune bør prioritere bruken av slikt areal de neste ti årene?<br>Ranger inntil tre alternativer der 1 er det viktigste: |         |                              |
| Spørsmålstekst                                                                                                                       | Offentlige bygg: Skole, idrett osv                                                                                                                                                                                                                              |         |                              |
| Instruksjoner til intervjueren                                                                                                       | [Spurt hvis u=2. ]                                                                                                                                                                                                                                              |         |                              |
| Kommentarer                                                                                                                          | Offentlige bygg: Skole, idrett osv (Politikerne må ofte velge om arealer som kan benyttes til matproduksjon skal brukes                                                                                                                                         |         |                              |
| Verdi                                                                                                                                | Merkelapp                                                                                                                                                                                                                                                       | Enheter | Prosent                      |
| 1                                                                                                                                    |                                                                                                                                                                                                                                                                 | 123     | <div><div></div></div> 3.0%  |
| 2                                                                                                                                    |                                                                                                                                                                                                                                                                 | 240     | <div><div></div></div> 5.8%  |
| 3                                                                                                                                    |                                                                                                                                                                                                                                                                 | 250     | <div><div></div></div> 6.1%  |
| 97                                                                                                                                   | Ikke svart                                                                                                                                                                                                                                                      | 0       |                              |
| 98                                                                                                                                   | Ikke spurt                                                                                                                                                                                                                                                      | 3490    | <div><div></div></div> 85.1% |
| Sysmiss                                                                                                                              |                                                                                                                                                                                                                                                                 | 586     |                              |
| Advarsel: disse tallene indikerer antall enheter (cases) i datafilen. De kan ikke tolkes som oppsummert statistikk for populasjonen. |                                                                                                                                                                                                                                                                 |         |                              |
| # r7km8: Ville installert solcellepanel dersom offentlig støtte dekker halvparten av kostnadene                                      |                                                                                                                                                                                                                                                                 |         |                              |
| Informasjon                                                                                                                          | [Type= diskret] [Format=numeric] [Rekkevidde= 1-4] [Missing=*]                                                                                                                                                                                                  |         |                              |
| Statistikk [NW/ W]                                                                                                                   | [Gyldige=4689 /-] [Ugyldig=0 /-]                                                                                                                                                                                                                                |         |                              |
| Spørsmålstekst                                                                                                                       | Ville du installert solcellepanel/solfangere dersom du fikk offentlig støtte til å dekke halvparten av kostnadene?                                                                                                                                              |         |                              |
| Instruksjoner til intervjueren                                                                                                       | [Spurt hvis u=2. ]                                                                                                                                                                                                                                              |         |                              |
| Kommentarer                                                                                                                          | Ville du installert solcellepanel/solfangere dersom du fikk offentlig støtte til å dekke halvparten av kostnadene?                                                                                                                                              |         |                              |
| Verdi                                                                                                                                | Merkelapp                                                                                                                                                                                                                                                       | Enheter | Prosent                      |
| 1                                                                                                                                    | Ja                                                                                                                                                                                                                                                              | 645     | <div><div></div></div> 13.8% |
| 2                                                                                                                                    | Nei                                                                                                                                                                                                                                                             | 203     | <div><div></div></div> 4.3%  |

| # r7km8: Ville installert solcellepanel dersom offentlig støtte dekker halvparten av kostnadene                                      |                                                                                                                                                                                                        |         |         |
|--------------------------------------------------------------------------------------------------------------------------------------|--------------------------------------------------------------------------------------------------------------------------------------------------------------------------------------------------------|---------|---------|
| Verdi                                                                                                                                | Merkelapp                                                                                                                                                                                              | Enheter | Prosent |
| 3                                                                                                                                    | Har allerede installert solcellepanel/solfangere                                                                                                                                                       | 10      | 0.2%    |
| 4                                                                                                                                    | Det er ikke praktisk mulig for meg å installere solcellepanel/solfangere                                                                                                                               | 304     | 6.5%    |
| 97                                                                                                                                   | Ikke svart                                                                                                                                                                                             | 37      | 0.8%    |
| 98                                                                                                                                   | Ikke spurt                                                                                                                                                                                             | 3490    | 74.4%   |
| Advarsel: disse tallene indikerer antall enheter (cases) i datafilen. De kan ikke tolkes som oppsummert statistikk for populasjonen. |                                                                                                                                                                                                        |         |         |
| # r7km8_comment: Ytterligere kommentarer [anonymisert]                                                                               |                                                                                                                                                                                                        |         |         |
| Informasjon                                                                                                                          | [Type= diskret] [Format=character] [Missing=*]                                                                                                                                                         |         |         |
| Statistikk [NW/ W]                                                                                                                   | [Gyldige=4689 /-] [Ugyldig=0 /-]                                                                                                                                                                       |         |         |
| Spørsmålstekst                                                                                                                       | Om du har ytterligere kommentarer, kan du skrive dem inn her:                                                                                                                                          |         |         |
| Instruksjoner til intervjueren                                                                                                       | [Spurt hvis u=2. ]<br>[Data tilbakeholdt av hensyn til anonymitet]                                                                                                                                     |         |         |
| Verdi                                                                                                                                | Merkelapp                                                                                                                                                                                              | Enheter | Prosent |
|                                                                                                                                      |                                                                                                                                                                                                        | 4689    | 100.0%  |
| Advarsel: disse tallene indikerer antall enheter (cases) i datafilen. De kan ikke tolkes som oppsummert statistikk for populasjonen. |                                                                                                                                                                                                        |         |         |
| # r7ran3: [Randomiserer hvis u=2. ]                                                                                                  |                                                                                                                                                                                                        |         |         |
| Informasjon                                                                                                                          | [Type= diskret] [Format=numeric] [Rekkevidde= 1-2] [Missing=*]                                                                                                                                         |         |         |
| Statistikk [NW/ W]                                                                                                                   | [Gyldige=1182 /-] [Ugyldig=3507 /-]                                                                                                                                                                    |         |         |
| Instruksjoner til intervjueren                                                                                                       | [Randomiserer hvis u=2. ]                                                                                                                                                                              |         |         |
| Verdi                                                                                                                                | Merkelapp                                                                                                                                                                                              | Enheter | Prosent |
| 1                                                                                                                                    | 1                                                                                                                                                                                                      | 578     | 48.9%   |
| 2                                                                                                                                    | 2                                                                                                                                                                                                      | 604     | 51.1%   |
| Sysmiss                                                                                                                              |                                                                                                                                                                                                        | 3507    |         |
| Advarsel: disse tallene indikerer antall enheter (cases) i datafilen. De kan ikke tolkes som oppsummert statistikk for populasjonen. |                                                                                                                                                                                                        |         |         |
| # r7pilotkm1_10_1_1: Balansen mellom å bruke naturen og ønsket om å ikke skade den?                                                  |                                                                                                                                                                                                        |         |         |
| Informasjon                                                                                                                          | [Type= diskret] [Format=numeric] [Rekkevidde= 1-7] [Missing=*]                                                                                                                                         |         |         |
| Statistikk [NW/ W]                                                                                                                   | [Gyldige=4689 /-] [Ugyldig=0 /-]                                                                                                                                                                       |         |         |
| Tekst før spørsmål                                                                                                                   | Politikerne våre står ofte ovenfor vanskelige avgjørelser. Dette gjelder ikke minst når det gjelder hvordan man skal balansere samfunnets behov for å bruke naturen og ønsket om å ikke skade naturen. |         |         |
| Spørsmålstekst                                                                                                                       | Hvis du tenker på dagens situasjon i Norge, hvordan synes du denne balansen er i dag?                                                                                                                  |         |         |
| Instruksjoner til intervjueren                                                                                                       | [Spurt hvis u=2. ]                                                                                                                                                                                     |         |         |
| Verdi                                                                                                                                | Merkelapp                                                                                                                                                                                              | Enheter | Prosent |
| 1                                                                                                                                    | Legger for stor vekt på hensynet til naturen                                                                                                                                                           | 16      | 0.3%    |
| 2                                                                                                                                    | 2                                                                                                                                                                                                      | 52      | 1.1%    |
| 3                                                                                                                                    | 3                                                                                                                                                                                                      | 130     | 2.8%    |
| 4                                                                                                                                    | God balanse                                                                                                                                                                                            | 452     | 9.6%    |
| 5                                                                                                                                    | 5                                                                                                                                                                                                      | 240     | 5.1%    |
| 6                                                                                                                                    | 6                                                                                                                                                                                                      | 173     | 3.7%    |
| 7                                                                                                                                    | Legger for stor vekt på hensynet til samfunnet                                                                                                                                                         | 67      | 1.4%    |
| 97                                                                                                                                   | Ikke svart                                                                                                                                                                                             | 69      | 1.5%    |
| 98                                                                                                                                   | Ikke spurt                                                                                                                                                                                             | 3490    | 74.4%   |

# r7pilotkm1\_10\_1\_1: Balansen mellom å bruke naturen og ønsket om å ikke skade den?

Advarsel: disse tallene indikerer antall enheter (cases) i datafilen. De kan ikke tolkes som oppsummert statistikk for populasjonen.

# r7pilotkm1\_10\_2: Hvordan bør politikerne prioritere mellom naturhensyn og samfunnshensyn?

Informasjon

[Type= diskret] [Format=numeric] [Rekkevidde= 1-3] [Missing=\*]

Statistikk [NW/ W]

[Gyldige=4689 /-] [Ugyldig=0 /-]

Spørsmålstekst

Hvordan mener du at politikerne bør prioritere mellom naturhensyn og samfunnshensyn?

Instruksjoner til intervjueren

[Spurt hvis u=2 og ran3=1. ]

Kommentarer

Hvordan mener du at politikerne bør prioritere mellom naturhensyn og samfunnshensyn?

Verdi

Merkelapp

Enheter

Prosent

1

Naturhensyn bør som hovedregel gå foran samfunnshensyn.

104

2.2%

2

Mindre alvorlige skader på natur kan være akseptabelt, men kun når helt nødvendige samfunnshensyn tilsier det.

433

9.2%

3

Alvorlige skader på naturen kan være akseptabelt, men kun når helt nødvendige samfunnshensyn tilsier det.

35

0.7%

97

Ikke svart

6

0.1%

98

Ikke spurt

4111

87.7%

Advarsel: disse tallene indikerer antall enheter (cases) i datafilen. De kan ikke tolkes som oppsummert statistikk for populasjonen.

# r7pilotkm1\_10\_2\_flipped: Hvordan bør politikerne prioritere mellom naturhensyn og samfunnshensyn?

Informasjon

[Type= diskret] [Format=numeric] [Rekkevidde= 1-3] [Missing=\*]

Statistikk [NW/ W]

[Gyldige=4689 /-] [Ugyldig=0 /-]

Spørsmålstekst

Hvordan mener du at politikerne bør prioritere mellom naturhensyn og samfunnshensyn?

Instruksjoner til intervjueren

[Spurt hvis u=2 og ran3=2. ]

[Skala snudd på hodet, sammenlignet med r7pilotkm1\_10\_2]

Kommentarer

Hvordan mener du at politikerne bør prioritere mellom naturhensyn og samfunnshensyn?

Verdi

Merkelapp

Enheter

Prosent

1

Alvorlige skader på naturen kan være akseptabelt, men kun når helt nødvendige samfunnshensyn tilsier det.

48

1.0%

2

Mindre alvorlige skader på natur kan være akseptabelt, men kun når helt nødvendige samfunnshensyn tilsier det.

423

9.0%

3

Naturhensyn bør som hovedregel gå foran samfunnshensyn.

123

2.6%

97

Ikke svart

10

0.2%

98

Ikke spurt

4085

87.1%

Advarsel: disse tallene indikerer antall enheter (cases) i datafilen. De kan ikke tolkes som oppsummert statistikk for populasjonen.

# r7pilotkm1\_comment: Kommentarer [anonymisert]

Informasjon

[Type= diskret] [Format=character] [Missing=\*]

Statistikk [NW/ W]

[Gyldige=4689 /-] [Ugyldig=0 /-]

Spørsmålstekst

Om du har noen kommentarer, kan du skrive dem her:

Instruksjoner til intervjueren

[Spurt hvis u=2. ]

[Data tilbakeholdt av hensyn til anonymitet]

Verdi

Merkelapp

Enheter

Prosent

4689

100.0%

Advarsel: disse tallene indikerer antall enheter (cases) i datafilen. De kan ikke tolkes som oppsummert statistikk for populasjonen.

# r7ran4: [Randomiserer hvis u=2. ]

Informasjon

[Type= diskret] [Format=numeric] [Rekkevidde= 1-5] [Missing=\*]

- 316 -

| # r7ran4: [Randomiserer hvis u=2. ]                                                                                                  |                                                                                                                                                                                                                                                                                                                                          |         |                   |
|--------------------------------------------------------------------------------------------------------------------------------------|------------------------------------------------------------------------------------------------------------------------------------------------------------------------------------------------------------------------------------------------------------------------------------------------------------------------------------------|---------|-------------------|
| Statistikk [NW/ W]                                                                                                                   | [Gyldige=1182 /-] [Ugyldig=3507 /-]                                                                                                                                                                                                                                                                                                      |         |                   |
| Instruksjoner til intervjueren                                                                                                       | [Randomiserer hvis u=2. ]                                                                                                                                                                                                                                                                                                                |         |                   |
| Verdi                                                                                                                                | Merkelapp                                                                                                                                                                                                                                                                                                                                | Enheter | Prosent           |
| 1                                                                                                                                    | 1                                                                                                                                                                                                                                                                                                                                        | 262     | <div></div> 22.2% |
| 2                                                                                                                                    | 2                                                                                                                                                                                                                                                                                                                                        | 218     | <div></div> 18.4% |
| 3                                                                                                                                    | 3                                                                                                                                                                                                                                                                                                                                        | 229     | <div></div> 19.4% |
| 4                                                                                                                                    | 4                                                                                                                                                                                                                                                                                                                                        | 238     | <div></div> 20.1% |
| 5                                                                                                                                    | 5                                                                                                                                                                                                                                                                                                                                        | 235     | <div></div> 19.9% |
| Sysmiss                                                                                                                              |                                                                                                                                                                                                                                                                                                                                          | 3507    |                   |
| Advarsel: disse tallene indikerer antall enheter (cases) i datafilen. De kan ikke tolkes som oppsummert statistikk for populasjonen. |                                                                                                                                                                                                                                                                                                                                          |         |                   |
| # r7pilotkm2_s1: Åpne for oljeproduksjon eller la oljen ligge ved LoVeSe: Motstanders argument                                       |                                                                                                                                                                                                                                                                                                                                          |         |                   |
| Informasjon                                                                                                                          | [Type= diskret] [Format=numeric] [Rekkevidde= 1-2] [Missing=*]                                                                                                                                                                                                                                                                           |         |                   |
| Statistikk [NW/ W]                                                                                                                   | [Gyldige=4689 /-] [Ugyldig=0 /-]                                                                                                                                                                                                                                                                                                         |         |                   |
| Tekst før spørsmål                                                                                                                   | I debatten rundt olje- og gassutvinning i området utenfor Lofoten, Vesterålen og Senja argumenterer motstanderne for at en ulykke med store oljeutslipp vil true hele den nord-atlantiske torskebestanden som gyter i dette området, og at man ut fra klimahensyn og internasjonale forpliktelser er nødt til å dempe utvinningstempoet. |         |                   |
| Spørsmålstekst                                                                                                                       | Hva synes du, bør vi åpne opp for olje- og gassproduksjon i området utenfor Lofoten, Vesterålen og Senja eller bør vi la oljen og gassen i dette området ligge?                                                                                                                                                                          |         |                   |
| Instruksjoner til intervjueren                                                                                                       | [Spurt hvis u=2, ran4=1 og ran40=4. ]                                                                                                                                                                                                                                                                                                    |         |                   |
| Kommentarer                                                                                                                          | I debatten rundt olje- og gassutvinning i området utenfor Lofoten, Vesterålen og Senja argumenterer motstanderne for at                                                                                                                                                                                                                  |         |                   |
| Verdi                                                                                                                                | Merkelapp                                                                                                                                                                                                                                                                                                                                | Enheter | Prosent           |
| 1                                                                                                                                    | Vi bør åpne for olje- og gassproduksjon utenfor Lofoten, Vesterålen og Senja.                                                                                                                                                                                                                                                            | 21      | <div></div> 0.4%  |
| 2                                                                                                                                    | Vi bør ikke åpne for olje- og gassproduksjon utenfor Lofoten, Vesterålen og Senja.                                                                                                                                                                                                                                                       | 33      | <div></div> 0.7%  |
| 97                                                                                                                                   | Ikke svart                                                                                                                                                                                                                                                                                                                               | 2       | <div></div> 0.0%  |
| 98                                                                                                                                   | Ikke spurt                                                                                                                                                                                                                                                                                                                               | 4633    | <div></div> 98.8% |
| Advarsel: disse tallene indikerer antall enheter (cases) i datafilen. De kan ikke tolkes som oppsummert statistikk for populasjonen. |                                                                                                                                                                                                                                                                                                                                          |         |                   |
| # r7pilotkm2_s2: Åpne for oljeproduksjon eller la oljen ligge ved LoVeSe: Forkjempers argument                                       |                                                                                                                                                                                                                                                                                                                                          |         |                   |
| Informasjon                                                                                                                          | [Type= diskret] [Format=numeric] [Rekkevidde= 1-2] [Missing=*]                                                                                                                                                                                                                                                                           |         |                   |
| Statistikk [NW/ W]                                                                                                                   | [Gyldige=4689 /-] [Ugyldig=0 /-]                                                                                                                                                                                                                                                                                                         |         |                   |
| Tekst før spørsmål                                                                                                                   | I debatten rundt olje- og gassutvinning i området utenfor Lofoten, Vesterålen og Senja argumenterer forkjemperne med at olje- og gassutvinning er viktig for arbeidsplasser, og at sikkerheten rundt oljevirksomheten i dag er så god at sjansene for ulykker med store utslipp er minimale.                                             |         |                   |
| Spørsmålstekst                                                                                                                       | Hva synes du, bør vi åpne opp for olje- og gassproduksjon i området utenfor Lofoten, Vesterålen og Senja eller bør vi la oljen og gassen i dette området ligge?                                                                                                                                                                          |         |                   |
| Instruksjoner til intervjueren                                                                                                       | [Spurt hvis u=2, ran4=2 og ran40=4. ]                                                                                                                                                                                                                                                                                                    |         |                   |
| Kommentarer                                                                                                                          | I debatten rundt olje- og gassutvinning i området utenfor Lofoten, Vesterålen og Senja argumenterer forkjemperne med at                                                                                                                                                                                                                  |         |                   |
| Verdi                                                                                                                                | Merkelapp                                                                                                                                                                                                                                                                                                                                | Enheter | Prosent           |
| 1                                                                                                                                    | Vi bør åpne for olje- og gassproduksjon utenfor Lofoten, Vesterålen og Senja.                                                                                                                                                                                                                                                            | 25      | <div></div> 0.5%  |
| 2                                                                                                                                    | Vi bør ikke åpne for olje- og gassproduksjon utenfor Lofoten, Vesterålen og Senja.                                                                                                                                                                                                                                                       | 25      | <div></div> 0.5%  |
| 97                                                                                                                                   | Ikke svart                                                                                                                                                                                                                                                                                                                               | 3       | <div></div> 0.1%  |

| # r7pilotkm2_s2: Åpne for oljeproduksjon eller la oljen ligge ved LoVeSe: Forkjempers argument                                       |  |                                                                                                                                                                                                                                                                                                                                                                                                                                                                                                                                                                    |  |         |  |                   |  |
|--------------------------------------------------------------------------------------------------------------------------------------|--|--------------------------------------------------------------------------------------------------------------------------------------------------------------------------------------------------------------------------------------------------------------------------------------------------------------------------------------------------------------------------------------------------------------------------------------------------------------------------------------------------------------------------------------------------------------------|--|---------|--|-------------------|--|
| Verdi                                                                                                                                |  | Merkelapp                                                                                                                                                                                                                                                                                                                                                                                                                                                                                                                                                          |  | Enheter |  | Prosent           |  |
| 98                                                                                                                                   |  | Ikke spurt                                                                                                                                                                                                                                                                                                                                                                                                                                                                                                                                                         |  | 4636    |  | <div></div> 98.9% |  |
| Advarsel: disse tallene indikerer antall enheter (cases) i datafilen. De kan ikke tolkes som oppsummert statistikk for populasjonen. |  |                                                                                                                                                                                                                                                                                                                                                                                                                                                                                                                                                                    |  |         |  |                   |  |
| # r7pilotkm2_s3: Åpne for oljeproduksjon eller la oljen ligge ved LoVeSe: Først motstander, så forkjempers argument                  |  |                                                                                                                                                                                                                                                                                                                                                                                                                                                                                                                                                                    |  |         |  |                   |  |
| Informasjon                                                                                                                          |  | [Type= diskret] [Format=numeric] [Rekkevidde= 1-2] [Missing=*]                                                                                                                                                                                                                                                                                                                                                                                                                                                                                                     |  |         |  |                   |  |
| Statistikk [NW/ W]                                                                                                                   |  | [Gyldige=4689 /-] [Ugyldig=0 /-]                                                                                                                                                                                                                                                                                                                                                                                                                                                                                                                                   |  |         |  |                   |  |
| Tekst før spørsmål                                                                                                                   |  | I debatten rundt olje- og gassutvinning i området utenfor Lofoten, Vesterålen og Senja argumenterer motstanderne for at en ulykke med store oljeutslipp vil true hele den nord-atlantiske torskebestanden som gyter i dette området, og at man ut fra klimahensyn og internasjonale forpliktelser er nødt til å dempe utvinningstempoet. Forkjemperne hevder imidlertid at olje- og gassutvinning er viktig for arbeidsplasser, og at sikkerheten rundt oljevirksomheten i dag er så god at sjansene for ulykker med store utslipp er minimale.                    |  |         |  |                   |  |
| Spørsmålstekst                                                                                                                       |  | Hva synes du, bør vi åpne opp for olje- og gassproduksjon i området utenfor Lofoten, Vesterålen og Senja eller bør vi la oljen og gassen i dette området ligge?                                                                                                                                                                                                                                                                                                                                                                                                    |  |         |  |                   |  |
| Instruksjoner til intervjueren                                                                                                       |  | [Spurt hvis u=2, ran4=3 og ran40=4. ]                                                                                                                                                                                                                                                                                                                                                                                                                                                                                                                              |  |         |  |                   |  |
| Kommentarer                                                                                                                          |  | I debatten rundt olje- og gassutvinning i området utenfor Lofoten, Vesterålen og Senja argumenterer motstanderne for at                                                                                                                                                                                                                                                                                                                                                                                                                                            |  |         |  |                   |  |
| Verdi                                                                                                                                |  | Merkelapp                                                                                                                                                                                                                                                                                                                                                                                                                                                                                                                                                          |  | Enheter |  | Prosent           |  |
| 1                                                                                                                                    |  | Vi bør åpne for olje- og gassproduksjon utenfor Lofoten, Vesterålen og Senja.                                                                                                                                                                                                                                                                                                                                                                                                                                                                                      |  | 26      |  | <div></div> 0.6%  |  |
| 2                                                                                                                                    |  | Vi bør ikke åpne for olje- og gassproduksjon utenfor Lofoten, Vesterålen og Senja.                                                                                                                                                                                                                                                                                                                                                                                                                                                                                 |  | 27      |  | <div></div> 0.6%  |  |
| 97                                                                                                                                   |  | Ikke svart                                                                                                                                                                                                                                                                                                                                                                                                                                                                                                                                                         |  | 3       |  | <div></div> 0.1%  |  |
| 98                                                                                                                                   |  | Ikke spurt                                                                                                                                                                                                                                                                                                                                                                                                                                                                                                                                                         |  | 4633    |  | <div></div> 98.8% |  |
| Advarsel: disse tallene indikerer antall enheter (cases) i datafilen. De kan ikke tolkes som oppsummert statistikk for populasjonen. |  |                                                                                                                                                                                                                                                                                                                                                                                                                                                                                                                                                                    |  |         |  |                   |  |
| # r7pilotkm2_s4: Åpne for oljeproduksjon eller la oljen ligge ved LoVeSe: Først forkjemper, så motstanders argument                  |  |                                                                                                                                                                                                                                                                                                                                                                                                                                                                                                                                                                    |  |         |  |                   |  |
| Informasjon                                                                                                                          |  | [Type= diskret] [Format=numeric] [Rekkevidde= 1-2] [Missing=*]                                                                                                                                                                                                                                                                                                                                                                                                                                                                                                     |  |         |  |                   |  |
| Statistikk [NW/ W]                                                                                                                   |  | [Gyldige=4689 /-] [Ugyldig=0 /-]                                                                                                                                                                                                                                                                                                                                                                                                                                                                                                                                   |  |         |  |                   |  |
| Tekst før spørsmål                                                                                                                   |  | I debatten rundt olje- og gassutvinning i området utenfor Lofoten, Vesterålen og Senja argumenterer forkjemperne med at fortsatt olje- og gassutvinning er viktig for arbeidsplasser, og at sikkerheten rundt oljevirksomheten i dag er så god at sjansene for ulykker med store utslipp er minimale. Motstanderne argumenterer imidlertid med at en ulykke med store oljeutslipp vil true hele den nord-atlantiske torskebestanden som gyter i dette området, og at man ut fra klimahensyn og internasjonale forpliktelser er nødt til å dempe utvinningstempoet. |  |         |  |                   |  |
| Spørsmålstekst                                                                                                                       |  | Hva synes du, bør vi åpne opp for olje- og gassproduksjon i området utenfor Lofoten, Vesterålen og Senja eller bør vi la oljen og gassen i dette området ligge?                                                                                                                                                                                                                                                                                                                                                                                                    |  |         |  |                   |  |
| Instruksjoner til intervjueren                                                                                                       |  | [Spurt hvis u=2, ran4=4 og ran40=4. ]                                                                                                                                                                                                                                                                                                                                                                                                                                                                                                                              |  |         |  |                   |  |
| Kommentarer                                                                                                                          |  | I debatten rundt olje- og gassutvinning i området utenfor Lofoten, Vesterålen og Senja argumenterer forkjemperne med at                                                                                                                                                                                                                                                                                                                                                                                                                                            |  |         |  |                   |  |
| Verdi                                                                                                                                |  | Merkelapp                                                                                                                                                                                                                                                                                                                                                                                                                                                                                                                                                          |  | Enheter |  | Prosent           |  |
| 1                                                                                                                                    |  | Vi bør åpne for olje- og gassproduksjon utenfor Lofoten, Vesterålen og Senja.                                                                                                                                                                                                                                                                                                                                                                                                                                                                                      |  | 23      |  | <div></div> 0.5%  |  |
| 2                                                                                                                                    |  | Vi bør ikke åpne for olje- og gassproduksjon utenfor Lofoten, Vesterålen og Senja.                                                                                                                                                                                                                                                                                                                                                                                                                                                                                 |  | 31      |  | <div></div> 0.7%  |  |
| 97                                                                                                                                   |  | Ikke svart                                                                                                                                                                                                                                                                                                                                                                                                                                                                                                                                                         |  | 2       |  | <div></div> 0.0%  |  |
| 98                                                                                                                                   |  | Ikke spurt                                                                                                                                                                                                                                                                                                                                                                                                                                                                                                                                                         |  | 4633    |  | <div></div> 98.8% |  |
| Advarsel: disse tallene indikerer antall enheter (cases) i datafilen. De kan ikke tolkes som oppsummert statistikk for populasjonen. |  |                                                                                                                                                                                                                                                                                                                                                                                                                                                                                                                                                                    |  |         |  |                   |  |
| # r7pilotkm2_s5: Åpne for oljeproduksjon eller la oljen ligge ved LoVeSe                                                             |  |                                                                                                                                                                                                                                                                                                                                                                                                                                                                                                                                                                    |  |         |  |                   |  |
| Informasjon                                                                                                                          |  | [Type= diskret] [Format=numeric] [Rekkevidde= 1-2] [Missing=*]                                                                                                                                                                                                                                                                                                                                                                                                                                                                                                     |  |         |  |                   |  |
| Statistikk [NW/ W]                                                                                                                   |  | [Gyldige=4689 /-] [Ugyldig=0 /-]                                                                                                                                                                                                                                                                                                                                                                                                                                                                                                                                   |  |         |  |                   |  |

# r7pilotkm2\_s5: Åpne for oljeproduksjon eller la oljen ligge ved LoVeSe

Spørsmålstekst

Hva synes du, bør vi åpne opp for olje- og gassproduksjon i området utenfor Lofoten, Vesterålen og Senja eller bør vi la oljen og gassen i dette området ligge?

Instruksjoner til intervjueren

[Spurt hvis u=2, ran4=5 og ran40=4. ]

Kommentarer

Hva synes du, bør vi åpne opp for olje- og gassproduksjon i området utenfor Lofoten, Vesterålen og Senja eller bør v

| Verdi | Merkelapp                                                                          | Enheter | Prosent |
|-------|------------------------------------------------------------------------------------|---------|---------|
| 1     | Vi bør åpne for olje- og gassproduksjon utenfor Lofoten, Vesterålen og Senja.      | 29      | 0.6%    |
| 2     | Vi bør ikke åpne for olje- og gassproduksjon utenfor Lofoten, Vesterålen og Senja. | 33      | 0.7%    |
| 97    | Ikke svart                                                                         | 4       | 0.1%    |
| 98    | Ikke spurt                                                                         | 4623    | 98.6%   |

Advarsel: disse tallene indikerer antall enheter (cases) i datafilen. De kan ikke tolkes som oppsummert statistikk for populasjonen.

# r7pilotkm2\_comment: Kommentarer [anonymisert]

Informasjon

[Type= diskret] [Format=character] [Missing=\*]

Statistikk [NW/ W]

[Gyldige=4689 /-] [Ugyldig=0 /-]

Spørsmålstekst

Om du har noen kommentarer, kan du skrive dem her:

Instruksjoner til intervjueren

[Spurt hvis u=2, ran40=4. ]

| Verdi | Merkelapp | Enheter | Prosent |
|-------|-----------|---------|---------|
|       |           | 4689    | 100.0%  |

Advarsel: disse tallene indikerer antall enheter (cases) i datafilen. De kan ikke tolkes som oppsummert statistikk for populasjonen.

# r7km10\_1: Hvilke sykdommer ville du ønsket antibiotika til: Bihulebetennelse

Informasjon

[Type= diskret] [Format=numeric] [Rekkevidde= 1-1] [Missing=\*]

Statistikk [NW/ W]

[Gyldige=4689 /-] [Ugyldig=0 /-]

Tekst før spørsmål

For hvilke av de følgende sykdommer ville du ønsket antibiotika?  
Det er mulig å krysse av på flere

Spørsmålstekst

Bihulebetennelse

Instruksjoner til intervjueren

[Spurt hvis u=2. ]

Kommentarer

Bihulebetennelse (For hvilke av de følgende sykdommer ville du ønsket antibiotika?)

| Verdi | Merkelapp        | Enheter | Prosent |
|-------|------------------|---------|---------|
| 0     |                  | 657     | 14.0%   |
| 1     | Bihulebetennelse | 524     | 11.2%   |
| 97    | Ikke svart       | 18      | 0.4%    |
| 98    | Ikke spurt       | 3490    | 74.4%   |

Advarsel: disse tallene indikerer antall enheter (cases) i datafilen. De kan ikke tolkes som oppsummert statistikk for populasjonen.

# r7km10\_2: Hvilke sykdommer ville du ønsket antibiotika til: Bronkitt

Informasjon

[Type= diskret] [Format=numeric] [Rekkevidde= 1-1] [Missing=\*]

Statistikk [NW/ W]

[Gyldige=4689 /-] [Ugyldig=0 /-]

Tekst før spørsmål

For hvilke av de følgende sykdommer ville du ønsket antibiotika?  
Det er mulig å krysse av på flere

Spørsmålstekst

Bronkitt

Instruksjoner til intervjueren

[Spurt hvis u=2. ]

| # r7km10_2: Hvilke sykdommer ville du ønsket antibiotika til: Bronkitt                                                               |                                                                                                       |         |                              |
|--------------------------------------------------------------------------------------------------------------------------------------|-------------------------------------------------------------------------------------------------------|---------|------------------------------|
| Verdi                                                                                                                                | Merkelapp                                                                                             | Enheter | Prosent                      |
| 0                                                                                                                                    |                                                                                                       | 787     | <div><div></div></div> 16.8% |
| 1                                                                                                                                    | Bronkitt                                                                                              | 394     | <div><div></div></div> 8.4%  |
| 97                                                                                                                                   | Ikke svart                                                                                            | 18      | <div><div></div></div> 0.4%  |
| 98                                                                                                                                   | Ikke spurt                                                                                            | 3490    | <div><div></div></div> 74.4% |
| Advarsel: disse tallene indikerer antall enheter (cases) i datafilen. De kan ikke tolkes som oppsummert statistikk for populasjonen. |                                                                                                       |         |                              |
| # r7km10_3: Hvilke sykdommer ville du ønsket antibiotika til: Forkjølelse                                                            |                                                                                                       |         |                              |
| Informasjon                                                                                                                          | [Type= diskret] [Format=numeric] [Rekkevidde= 1-1] [Missing=*]                                        |         |                              |
| Statistikk [NW/ W]                                                                                                                   | [Gyldige=4689 /-] [Ugyldig=0 /-]                                                                      |         |                              |
| Tekst før spørsmål                                                                                                                   | For hvilke av de følgende sykdommer ville du ønsket antibiotika?<br>Det er mulig å krysse av på flere |         |                              |
| Spørsmålstekst                                                                                                                       | Forkjølelse                                                                                           |         |                              |
| Instruksjoner til intervjueren                                                                                                       | [Spurt hvis u=2. ]                                                                                    |         |                              |
| Verdi                                                                                                                                | Merkelapp                                                                                             | Enheter | Prosent                      |
| 0                                                                                                                                    |                                                                                                       | 1166    | <div><div></div></div> 24.9% |
| 1                                                                                                                                    | Forkjølelse                                                                                           | 15      | <div><div></div></div> 0.3%  |
| 97                                                                                                                                   | Ikke svart                                                                                            | 18      | <div><div></div></div> 0.4%  |
| 98                                                                                                                                   | Ikke spurt                                                                                            | 3490    | <div><div></div></div> 74.4% |
| Advarsel: disse tallene indikerer antall enheter (cases) i datafilen. De kan ikke tolkes som oppsummert statistikk for populasjonen. |                                                                                                       |         |                              |
| # r7km10_4: Hvilke sykdommer ville du ønsket antibiotika til: Halsbetennelse                                                         |                                                                                                       |         |                              |
| Informasjon                                                                                                                          | [Type= diskret] [Format=numeric] [Rekkevidde= 1-1] [Missing=*]                                        |         |                              |
| Statistikk [NW/ W]                                                                                                                   | [Gyldige=4689 /-] [Ugyldig=0 /-]                                                                      |         |                              |
| Tekst før spørsmål                                                                                                                   | For hvilke av de følgende sykdommer ville du ønsket antibiotika?<br>Det er mulig å krysse av på flere |         |                              |
| Spørsmålstekst                                                                                                                       | Halsbetennelse                                                                                        |         |                              |
| Instruksjoner til intervjueren                                                                                                       | [Spurt hvis u=2. ]                                                                                    |         |                              |
| Kommentarer                                                                                                                          | Halsbetennelse (streptokokker) (For hvilke av de følgende sykdommer ville du ønsket antibiotika?)     |         |                              |
| Verdi                                                                                                                                | Merkelapp                                                                                             | Enheter | Prosent                      |
| 0                                                                                                                                    |                                                                                                       | 449     | <div><div></div></div> 9.6%  |
| 1                                                                                                                                    | Halsbetennelse                                                                                        | 732     | <div><div></div></div> 15.6% |
| 97                                                                                                                                   | Ikke svart                                                                                            | 18      | <div><div></div></div> 0.4%  |
| 98                                                                                                                                   | Ikke spurt                                                                                            | 3490    | <div><div></div></div> 74.4% |
| Advarsel: disse tallene indikerer antall enheter (cases) i datafilen. De kan ikke tolkes som oppsummert statistikk for populasjonen. |                                                                                                       |         |                              |
| # r7km10_5: Hvilke sykdommer ville du ønsket antibiotika til: Influensa                                                              |                                                                                                       |         |                              |
| Informasjon                                                                                                                          | [Type= diskret] [Format=numeric] [Rekkevidde= 1-1] [Missing=*]                                        |         |                              |
| Statistikk [NW/ W]                                                                                                                   | [Gyldige=4689 /-] [Ugyldig=0 /-]                                                                      |         |                              |
| Tekst før spørsmål                                                                                                                   | For hvilke av de følgende sykdommer ville du ønsket antibiotika?<br>Det er mulig å krysse av på flere |         |                              |
| Spørsmålstekst                                                                                                                       | Influensa                                                                                             |         |                              |
| Instruksjoner til intervjueren                                                                                                       | [Spurt hvis u=2. ]                                                                                    |         |                              |



| # r7km10_5: Hvilke sykdommer ville du ønsket antibiotika til: Influensa                                                              |                                                                                                                                                                                                                                                                                                                    |         |                               |
|--------------------------------------------------------------------------------------------------------------------------------------|--------------------------------------------------------------------------------------------------------------------------------------------------------------------------------------------------------------------------------------------------------------------------------------------------------------------|---------|-------------------------------|
| Verdi                                                                                                                                | Merkelapp                                                                                                                                                                                                                                                                                                          | Enheter | Prosent                       |
| 0                                                                                                                                    |                                                                                                                                                                                                                                                                                                                    | 1080    | <div><div></div></div> 23.0%  |
| 1                                                                                                                                    | Influensa                                                                                                                                                                                                                                                                                                          | 101     | <div><div></div></div> 2.2%   |
| 97                                                                                                                                   | Ikke svart                                                                                                                                                                                                                                                                                                         | 18      | <div><div></div></div> 0.4%   |
| 98                                                                                                                                   | Ikke spurt                                                                                                                                                                                                                                                                                                         | 3490    | <div><div></div></div> 74.4%  |
| Advarsel: disse tallene indikerer antall enheter (cases) i datafilen. De kan ikke tolkes som oppsummert statistikk for populasjonen. |                                                                                                                                                                                                                                                                                                                    |         |                               |
| # r7km10_6: Hvilke sykdommer ville du ønsket antibiotika til: Ørebetennelse                                                          |                                                                                                                                                                                                                                                                                                                    |         |                               |
| Informasjon                                                                                                                          | [Type= diskret] [Format=numeric] [Rekkevidde= 1-1] [Missing=*]                                                                                                                                                                                                                                                     |         |                               |
| Statistikk [NW/ W]                                                                                                                   | [Gyldige=4689 /-] [Ugyldig=0 /-]                                                                                                                                                                                                                                                                                   |         |                               |
| Tekst før spørsmål                                                                                                                   | For hvilke av de følgende sykdommer ville du ønsket antibiotika?<br>Det er mulig å krysse av på flere                                                                                                                                                                                                              |         |                               |
| Spørsmålstekst                                                                                                                       | Ørebetennelse                                                                                                                                                                                                                                                                                                      |         |                               |
| Instruksjoner til intervjueren                                                                                                       | [Spurt hvis u=2. ]                                                                                                                                                                                                                                                                                                 |         |                               |
| Verdi                                                                                                                                | Merkelapp                                                                                                                                                                                                                                                                                                          | Enheter | Prosent                       |
| 0                                                                                                                                    |                                                                                                                                                                                                                                                                                                                    | 641     | <div><div></div></div> 13.7%  |
| 1                                                                                                                                    | Ørebetennelse                                                                                                                                                                                                                                                                                                      | 540     | <div><div></div></div> 11.5%  |
| 97                                                                                                                                   | Ikke svart                                                                                                                                                                                                                                                                                                         | 18      | <div><div></div></div> 0.4%   |
| 98                                                                                                                                   | Ikke spurt                                                                                                                                                                                                                                                                                                         | 3490    | <div><div></div></div> 74.4%  |
| Advarsel: disse tallene indikerer antall enheter (cases) i datafilen. De kan ikke tolkes som oppsummert statistikk for populasjonen. |                                                                                                                                                                                                                                                                                                                    |         |                               |
| # r7km10_comment: Kommentarer [anonymisert]                                                                                          |                                                                                                                                                                                                                                                                                                                    |         |                               |
| Informasjon                                                                                                                          | [Type= diskret] [Format=character] [Missing=*]                                                                                                                                                                                                                                                                     |         |                               |
| Statistikk [NW/ W]                                                                                                                   | [Gyldige=4689 /-] [Ugyldig=0 /-]                                                                                                                                                                                                                                                                                   |         |                               |
| Spørsmålstekst                                                                                                                       | Om du har noen kommentarer, kan du skrive dem her:                                                                                                                                                                                                                                                                 |         |                               |
| Instruksjoner til intervjueren                                                                                                       | [Spurt hvis u=2. ]<br>[Data tilbakeholdt av hensyn til anonymitet]                                                                                                                                                                                                                                                 |         |                               |
| Verdi                                                                                                                                | Merkelapp                                                                                                                                                                                                                                                                                                          | Enheter | Prosent                       |
|                                                                                                                                      |                                                                                                                                                                                                                                                                                                                    | 4689    | <div><div></div></div> 100.0% |
| Advarsel: disse tallene indikerer antall enheter (cases) i datafilen. De kan ikke tolkes som oppsummert statistikk for populasjonen. |                                                                                                                                                                                                                                                                                                                    |         |                               |
| # r7km12_1: Vikigste årsak når oppsøke lege for luftveisinfeksjon: Plagene varer lenger enn forventet                                |                                                                                                                                                                                                                                                                                                                    |         |                               |
| Informasjon                                                                                                                          | [Type= diskret] [Format=numeric] [Rekkevidde= 1-1] [Missing=*]                                                                                                                                                                                                                                                     |         |                               |
| Statistikk [NW/ W]                                                                                                                   | [Gyldige=4689 /-] [Ugyldig=0 /-]                                                                                                                                                                                                                                                                                   |         |                               |
| Tekst før spørsmål                                                                                                                   | Det kan være flere årsaker til at folk oppsøker lege for en luftveisinfeksjon. Hva er de viktigste årsakene for deg?<br>Luftveisinfeksjon er en gruppe sykdommer som f.eks. kan gi hoste, tett/rennende nese, feber, halssmerter, øresmerter, dårlig form etc. Det er mulig å krysse av på inntil to alternativer. |         |                               |
| Spørsmålstekst                                                                                                                       | At plagene varer lenger enn jeg forventer                                                                                                                                                                                                                                                                          |         |                               |
| Instruksjoner til intervjueren                                                                                                       | [Spurt hvis u=2. ]                                                                                                                                                                                                                                                                                                 |         |                               |
| Kommentarer                                                                                                                          | At plagene varer lenger enn jeg forventer (Det kan være flere årsaker til at folk oppsøker lege for en luftveisinfeksj                                                                                                                                                                                             |         |                               |
| Verdi                                                                                                                                | Merkelapp                                                                                                                                                                                                                                                                                                          | Enheter | Prosent                       |
| 0                                                                                                                                    |                                                                                                                                                                                                                                                                                                                    | 557     | <div><div></div></div> 11.9%  |
| 1                                                                                                                                    | At plagene varer lenger enn jeg forventer                                                                                                                                                                                                                                                                          | 623     | <div><div></div></div> 13.3%  |
| 97                                                                                                                                   | Ikke svart                                                                                                                                                                                                                                                                                                         | 19      | <div><div></div></div> 0.4%   |
| 98                                                                                                                                   | Ikke spurt                                                                                                                                                                                                                                                                                                         | 3490    | <div><div></div></div> 74.4%  |

| # r7km12_1: Vikigste årsak når oppsøke lege for luftveisinfeksjon: Plagene varer lenger enn forventet                                |                                                                                                                                                                                                                                                                                                                 |         |                              |
|--------------------------------------------------------------------------------------------------------------------------------------|-----------------------------------------------------------------------------------------------------------------------------------------------------------------------------------------------------------------------------------------------------------------------------------------------------------------|---------|------------------------------|
| Advarsel: disse tallene indikerer antall enheter (cases) i datafilen. De kan ikke tolkes som oppsummert statistikk for populasjonen. |                                                                                                                                                                                                                                                                                                                 |         |                              |
| # r7km12_2: Vikigste årsak når oppsøke lege for luftveisinfeksjon: Plage kraftigere enn forventet                                    |                                                                                                                                                                                                                                                                                                                 |         |                              |
| Informasjon                                                                                                                          | [Type= diskret] [Format=numeric] [Rekkevidde= 1-1] [Missing=*]                                                                                                                                                                                                                                                  |         |                              |
| Statistikk [NW/ W]                                                                                                                   | [Gyldige=4689 /-] [Ugyldig=0 /-]                                                                                                                                                                                                                                                                                |         |                              |
| Tekst før spørsmål                                                                                                                   | Det kan være flere årsaker til at folk oppsøker lege for en luftveisinfeksjon. Hva er de viktigste årsakene for deg? Luftveisinfeksjon er en gruppe sykdommer som f.eks. kan gi hoste, tett/rennende nese, feber, halssmerter, øresmerter, dårlig form etc. Det er mulig å krysse av på inntil to alternativer. |         |                              |
| Spørsmålstekst                                                                                                                       | At plagene er kraftigere enn jeg forventer                                                                                                                                                                                                                                                                      |         |                              |
| Instruksjoner til intervjueren                                                                                                       | [Spurt hvis u=2. ]                                                                                                                                                                                                                                                                                              |         |                              |
| Kommentarer                                                                                                                          | At plagene er kraftigere enn jeg forventer (Det kan være flere årsaker til at folk oppsøker lege for en luftveisinfeksjon)                                                                                                                                                                                      |         |                              |
| Verdi                                                                                                                                | Merkelapp                                                                                                                                                                                                                                                                                                       | Enheter | Prosent                      |
| 0                                                                                                                                    |                                                                                                                                                                                                                                                                                                                 | 521     | <div><div></div></div> 11.1% |
| 1                                                                                                                                    | At plagene er kraftigere enn jeg forventer                                                                                                                                                                                                                                                                      | 659     | <div><div></div></div> 14.1% |
| 97                                                                                                                                   | Ikke svart                                                                                                                                                                                                                                                                                                      | 19      | <div><div></div></div> 0.4%  |
| 98                                                                                                                                   | Ikke spurt                                                                                                                                                                                                                                                                                                      | 3490    | <div><div></div></div> 74.4% |
| Advarsel: disse tallene indikerer antall enheter (cases) i datafilen. De kan ikke tolkes som oppsummert statistikk for populasjonen. |                                                                                                                                                                                                                                                                                                                 |         |                              |
| # r7km12_3: Vikigste årsak når oppsøke lege for luftveisinfeksjon: Trenger sykemelding                                               |                                                                                                                                                                                                                                                                                                                 |         |                              |
| Informasjon                                                                                                                          | [Type= diskret] [Format=numeric] [Rekkevidde= 1-1] [Missing=*]                                                                                                                                                                                                                                                  |         |                              |
| Statistikk [NW/ W]                                                                                                                   | [Gyldige=4689 /-] [Ugyldig=0 /-]                                                                                                                                                                                                                                                                                |         |                              |
| Tekst før spørsmål                                                                                                                   | Det kan være flere årsaker til at folk oppsøker lege for en luftveisinfeksjon. Hva er de viktigste årsakene for deg? Luftveisinfeksjon er en gruppe sykdommer som f.eks. kan gi hoste, tett/rennende nese, feber, halssmerter, øresmerter, dårlig form etc. Det er mulig å krysse av på inntil to alternativer. |         |                              |
| Spørsmålstekst                                                                                                                       | At jeg trenger sykemelding                                                                                                                                                                                                                                                                                      |         |                              |
| Instruksjoner til intervjueren                                                                                                       | [Spurt hvis u=2. ]                                                                                                                                                                                                                                                                                              |         |                              |
| Kommentarer                                                                                                                          | At jeg trenger sykemelding (Det kan være flere årsaker til at folk oppsøker lege for en luftveisinfeksjon. Hva er de v                                                                                                                                                                                          |         |                              |
| Verdi                                                                                                                                | Merkelapp                                                                                                                                                                                                                                                                                                       | Enheter | Prosent                      |
| 0                                                                                                                                    |                                                                                                                                                                                                                                                                                                                 | 940     | <div><div></div></div> 20.0% |
| 1                                                                                                                                    | At jeg trenger sykemelding                                                                                                                                                                                                                                                                                      | 240     | <div><div></div></div> 5.1%  |
| 97                                                                                                                                   | Ikke svart                                                                                                                                                                                                                                                                                                      | 19      | <div><div></div></div> 0.4%  |
| 98                                                                                                                                   | Ikke spurt                                                                                                                                                                                                                                                                                                      | 3490    | <div><div></div></div> 74.4% |
| Advarsel: disse tallene indikerer antall enheter (cases) i datafilen. De kan ikke tolkes som oppsummert statistikk for populasjonen. |                                                                                                                                                                                                                                                                                                                 |         |                              |
| # r7km12_4: Vikigste årsak når oppsøke lege for luftveisinfeksjon: Oppfordring av andre                                              |                                                                                                                                                                                                                                                                                                                 |         |                              |
| Informasjon                                                                                                                          | [Type= diskret] [Format=numeric] [Rekkevidde= 1-1] [Missing=*]                                                                                                                                                                                                                                                  |         |                              |
| Statistikk [NW/ W]                                                                                                                   | [Gyldige=4689 /-] [Ugyldig=0 /-]                                                                                                                                                                                                                                                                                |         |                              |
| Tekst før spørsmål                                                                                                                   | Det kan være flere årsaker til at folk oppsøker lege for en luftveisinfeksjon. Hva er de viktigste årsakene for deg? Luftveisinfeksjon er en gruppe sykdommer som f.eks. kan gi hoste, tett/rennende nese, feber, halssmerter, øresmerter, dårlig form etc. Det er mulig å krysse av på inntil to alternativer. |         |                              |
| Spørsmålstekst                                                                                                                       | At andre (familie, venner) oppfordrer meg til å oppsøke lege                                                                                                                                                                                                                                                    |         |                              |
| Instruksjoner til intervjueren                                                                                                       | [Spurt hvis u=2. ]                                                                                                                                                                                                                                                                                              |         |                              |
| Kommentarer                                                                                                                          | At andre (familie, venner) oppfordrer meg til å oppsøke lege (Det kan være flere årsaker til at folk oppsøker lege f                                                                                                                                                                                            |         |                              |
| Verdi                                                                                                                                | Merkelapp                                                                                                                                                                                                                                                                                                       | Enheter | Prosent                      |
| 0                                                                                                                                    |                                                                                                                                                                                                                                                                                                                 | 1010    | <div><div></div></div> 21.5% |

| # r7km12_4: Vikigste årsak når oppsøke lege for luftveisinfeksjon: Oppfordring av andre                                              |                                                                                                                                                                                                                                                                                                                 |         |                              |
|--------------------------------------------------------------------------------------------------------------------------------------|-----------------------------------------------------------------------------------------------------------------------------------------------------------------------------------------------------------------------------------------------------------------------------------------------------------------|---------|------------------------------|
| Verdi                                                                                                                                | Merkelapp                                                                                                                                                                                                                                                                                                       | Enheter | Prosent                      |
| 1                                                                                                                                    | At andre (familie, venner) oppfordrer meg til å oppsøke lege                                                                                                                                                                                                                                                    | 170     | <div><div></div></div> 3.6%  |
| 97                                                                                                                                   | Ikke svart                                                                                                                                                                                                                                                                                                      | 19      | <div><div></div></div> 0.4%  |
| 98                                                                                                                                   | Ikke spurt                                                                                                                                                                                                                                                                                                      | 3490    | <div><div></div></div> 74.4% |
| Advarsel: disse tallene indikerer antall enheter (cases) i datafilen. De kan ikke tolkes som oppsummert statistikk for populasjonen. |                                                                                                                                                                                                                                                                                                                 |         |                              |
| # r7km12_5: Vikigste årsak når oppsøke lege for luftveisinfeksjon: Bekjente med lignende plager fikk hjelp                           |                                                                                                                                                                                                                                                                                                                 |         |                              |
| Informasjon                                                                                                                          | [Type= diskret] [Format=numeric] [Rekkevidde= 1-1] [Missing=*]                                                                                                                                                                                                                                                  |         |                              |
| Statistikk [NW/ W]                                                                                                                   | [Gyldige=4689 /-] [Ugyldig=0 /-]                                                                                                                                                                                                                                                                                |         |                              |
| Tekst før spørsmål                                                                                                                   | Det kan være flere årsaker til at folk oppsøker lege for en luftveisinfeksjon. Hva er de viktigste årsakene for deg? Luftveisinfeksjon er en gruppe sykdommer som f.eks. kan gi hoste, tett/rennende nese, feber, halssmerter, øresmerter, dårlig form etc. Det er mulig å krysse av på inntil to alternativer. |         |                              |
| Spørsmålstekst                                                                                                                       | At andre jeg kjenner med lignende plager fikk hjelp av legen                                                                                                                                                                                                                                                    |         |                              |
| Instruksjoner til intervjueren                                                                                                       | [Spurt hvis u=2. ]                                                                                                                                                                                                                                                                                              |         |                              |
| Kommentarer                                                                                                                          | At andre jeg kjenner med lignende plager fikk hjelp av legen (Det kan være flere årsaker til at folk oppsøker lege for                                                                                                                                                                                          |         |                              |
| Verdi                                                                                                                                | Merkelapp                                                                                                                                                                                                                                                                                                       | Enheter | Prosent                      |
| 0                                                                                                                                    |                                                                                                                                                                                                                                                                                                                 | 1152    | <div><div></div></div> 24.6% |
| 1                                                                                                                                    | At andre jeg kjenner med lignende plager fikk hjelp av legen                                                                                                                                                                                                                                                    | 28      | <div><div></div></div> 0.6%  |
| 97                                                                                                                                   | Ikke svart                                                                                                                                                                                                                                                                                                      | 19      | <div><div></div></div> 0.4%  |
| 98                                                                                                                                   | Ikke spurt                                                                                                                                                                                                                                                                                                      | 3490    | <div><div></div></div> 74.4% |
| Advarsel: disse tallene indikerer antall enheter (cases) i datafilen. De kan ikke tolkes som oppsummert statistikk for populasjonen. |                                                                                                                                                                                                                                                                                                                 |         |                              |
| # r7km12_6: Vikigste årsak når oppsøke lege for luftveisinfeksjon: Annet                                                             |                                                                                                                                                                                                                                                                                                                 |         |                              |
| Informasjon                                                                                                                          | [Type= diskret] [Format=numeric] [Rekkevidde= 1-1] [Missing=*]                                                                                                                                                                                                                                                  |         |                              |
| Statistikk [NW/ W]                                                                                                                   | [Gyldige=4689 /-] [Ugyldig=0 /-]                                                                                                                                                                                                                                                                                |         |                              |
| Tekst før spørsmål                                                                                                                   | Det kan være flere årsaker til at folk oppsøker lege for en luftveisinfeksjon. Hva er de viktigste årsakene for deg? Luftveisinfeksjon er en gruppe sykdommer som f.eks. kan gi hoste, tett/rennende nese, feber, halssmerter, øresmerter, dårlig form etc. Det er mulig å krysse av på inntil to alternativer. |         |                              |
| Spørsmålstekst                                                                                                                       | Annet, skriv:                                                                                                                                                                                                                                                                                                   |         |                              |
| Instruksjoner til intervjueren                                                                                                       | [Spurt hvis u=2. ]                                                                                                                                                                                                                                                                                              |         |                              |
| Kommentarer                                                                                                                          | Annet, skriv: (Det kan være flere årsaker til at folk oppsøker lege for en luftveisinfeksjon. Hva er de viktigste års                                                                                                                                                                                           |         |                              |
| Verdi                                                                                                                                | Merkelapp                                                                                                                                                                                                                                                                                                       | Enheter | Prosent                      |
| 0                                                                                                                                    |                                                                                                                                                                                                                                                                                                                 | 1129    | <div><div></div></div> 24.1% |
| 1                                                                                                                                    | Annet, skriv:                                                                                                                                                                                                                                                                                                   | 51      | <div><div></div></div> 1.1%  |
| 97                                                                                                                                   | Ikke svart                                                                                                                                                                                                                                                                                                      | 19      | <div><div></div></div> 0.4%  |
| 98                                                                                                                                   | Ikke spurt                                                                                                                                                                                                                                                                                                      | 3490    | <div><div></div></div> 74.4% |
| Advarsel: disse tallene indikerer antall enheter (cases) i datafilen. De kan ikke tolkes som oppsummert statistikk for populasjonen. |                                                                                                                                                                                                                                                                                                                 |         |                              |
| # r7km12_6_other: Vikigste årsak når oppsøke lege for luftveisinfeksjon: Annet [anonymisert]                                         |                                                                                                                                                                                                                                                                                                                 |         |                              |
| Informasjon                                                                                                                          | [Type= diskret] [Format=character] [Missing=*]                                                                                                                                                                                                                                                                  |         |                              |
| Statistikk [NW/ W]                                                                                                                   | [Gyldige=4689 /-] [Ugyldig=0 /-]                                                                                                                                                                                                                                                                                |         |                              |
| Tekst før spørsmål                                                                                                                   | Det kan være flere årsaker til at folk oppsøker lege for en luftveisinfeksjon. Hva er de viktigste årsakene for deg? Luftveisinfeksjon er en gruppe sykdommer som f.eks. kan gi hoste, tett/rennende nese, feber, halssmerter, øresmerter, dårlig form etc. Det er mulig å krysse av på inntil to alternativer. |         |                              |
| Spørsmålstekst                                                                                                                       | Annet, skriv:                                                                                                                                                                                                                                                                                                   |         |                              |
| Instruksjoner til intervjueren                                                                                                       | [Spurt hvis u=2. ]                                                                                                                                                                                                                                                                                              |         |                              |

| # r7km12_6_other: Vikigste årsak når oppsøke lege for luftveisinfeksjon: Annet [anonymisert]                                         |                         |                                                                                                                       |                    |
|--------------------------------------------------------------------------------------------------------------------------------------|-------------------------|-----------------------------------------------------------------------------------------------------------------------|--------------------|
|                                                                                                                                      |                         | [Data tilbakeholdt av hensyn til anonymitet]                                                                          |                    |
| <b>Kommentarer</b>                                                                                                                   |                         | Annet, skriv: (Det kan være flere årsaker til at folk oppsøker lege for en luftveisinfeksjon. Hva er de viktigste års |                    |
| Verdi                                                                                                                                | Merkelapp               | Enheter                                                                                                               | Prosent            |
|                                                                                                                                      |                         | 4689                                                                                                                  | <div></div> 100.0% |
| 97                                                                                                                                   | Ikke svart              | 0                                                                                                                     |                    |
| 98                                                                                                                                   | Ikke spurt              | 0                                                                                                                     |                    |
| Advarsel: disse tallene indikerer antall enheter (cases) i datafilen. De kan ikke tolkes som oppsummert statistikk for populasjonen. |                         |                                                                                                                       |                    |
| # r7km12_comment: Kommentarer [anonymisert]                                                                                          |                         |                                                                                                                       |                    |
| <b>Informasjon</b>                                                                                                                   |                         | [Type= diskret] [Format=character] [Missing=*]                                                                        |                    |
| <b>Statistikk [NW/ W]</b>                                                                                                            |                         | [Gyldige=4689 /-] [Ugyldig=0 /-]                                                                                      |                    |
| <b>Spørsmålstekst</b>                                                                                                                |                         | Om du har noen kommentarer, kan du skrive dem her:                                                                    |                    |
| <b>Instruksjoner til intervjueren</b>                                                                                                |                         | [Spurt hvis u=2. ]                                                                                                    |                    |
|                                                                                                                                      |                         | [Data tilbakeholdt av hensyn til anonymitet]                                                                          |                    |
| Verdi                                                                                                                                | Merkelapp               | Enheter                                                                                                               | Prosent            |
|                                                                                                                                      |                         | 4689                                                                                                                  | <div></div> 100.0% |
| Advarsel: disse tallene indikerer antall enheter (cases) i datafilen. De kan ikke tolkes som oppsummert statistikk for populasjonen. |                         |                                                                                                                       |                    |
| # r7dvm1: Enig/uenig: Voksen asylsøker som har fått avslag, bør få opphold hvis barna har rett til å bo i landet                     |                         |                                                                                                                       |                    |
| <b>Informasjon</b>                                                                                                                   |                         | [Type= diskret] [Format=numeric] [Rekkevidde= 1-7] [Missing=*]                                                        |                    |
| <b>Statistikk [NW/ W]</b>                                                                                                            |                         | [Gyldige=4689 /-] [Ugyldig=0 /-]                                                                                      |                    |
| <b>Tekst før spørsmål</b>                                                                                                            |                         | Vi ønsker nå å få vite noe om dine synspunkter på samfunnet generelt og det nye mangfoldet i Norge.                   |                    |
|                                                                                                                                      |                         | Selv om en voksen asylsøker har fått avslag, kan staten vurdere å gi opphold dersom barna har rett til å bo i landet. |                    |
| <b>Spørsmålstekst</b>                                                                                                                |                         | Hvor enig eller uenig er du i at en asylsøker som har fått avslag bør få opphold i slike tilfeller?                   |                    |
| <b>Instruksjoner til intervjueren</b>                                                                                                |                         | [Spurt hvis u=2. ]                                                                                                    |                    |
| <b>Kommentarer</b>                                                                                                                   |                         | Vi ønsker nå å få vite noe om dine synspunkter på samfunnet generelt og det nye mangfoldet i Norge. Selv om en voks   |                    |
| Verdi                                                                                                                                | Merkelapp               | Enheter                                                                                                               | Prosent            |
| 1                                                                                                                                    | Svært enig              | 182                                                                                                                   | <div></div> 3.9%   |
| 2                                                                                                                                    | Enig                    | 354                                                                                                                   | <div></div> 7.5%   |
| 3                                                                                                                                    | Noe enig                | 262                                                                                                                   | <div></div> 5.6%   |
| 4                                                                                                                                    | Verken enig eller uenig | 98                                                                                                                    | <div></div> 2.1%   |
| 5                                                                                                                                    | Noe uenig               | 104                                                                                                                   | <div></div> 2.2%   |
| 6                                                                                                                                    | Uenig                   | 84                                                                                                                    | <div></div> 1.8%   |
| 7                                                                                                                                    | Svært uenig             | 85                                                                                                                    | <div></div> 1.8%   |
| 97                                                                                                                                   | Ikke svart              | 30                                                                                                                    | <div></div> 0.6%   |
| 98                                                                                                                                   | Ikke spurt              | 3490                                                                                                                  | <div></div> 74.4%  |
| Advarsel: disse tallene indikerer antall enheter (cases) i datafilen. De kan ikke tolkes som oppsummert statistikk for populasjonen. |                         |                                                                                                                       |                    |
| # r7ran11: [Randomiserer hvis u=2. ]                                                                                                 |                         |                                                                                                                       |                    |
| <b>Informasjon</b>                                                                                                                   |                         | [Type= diskret] [Format=numeric] [Rekkevidde= 1-3] [Missing=*]                                                        |                    |
| <b>Statistikk [NW/ W]</b>                                                                                                            |                         | [Gyldige=631 /-] [Ugyldig=4058 /-]                                                                                    |                    |
| <b>Instruksjoner til intervjueren</b>                                                                                                |                         | [Randomiserer hvis u=2. ]                                                                                             |                    |
| Verdi                                                                                                                                | Merkelapp               | Enheter                                                                                                               | Prosent            |
| 1                                                                                                                                    | 1                       | 226                                                                                                                   | <div></div> 35.8%  |

| # r7ran11: [Randomiserer hvis u=2. ]                                                                                                 |                                                                                                                                                         |         |             |       |
|--------------------------------------------------------------------------------------------------------------------------------------|---------------------------------------------------------------------------------------------------------------------------------------------------------|---------|-------------|-------|
| Verdi                                                                                                                                | Merkelapp                                                                                                                                               | Enheter | Prosent     |       |
| 2                                                                                                                                    | 2                                                                                                                                                       | 195     | <div></div> | 30.9% |
| 3                                                                                                                                    | 3                                                                                                                                                       | 210     | <div></div> | 33.3% |
| Sysmiss                                                                                                                              |                                                                                                                                                         | 4058    |             |       |
| Advarsel: disse tallene indikerer antall enheter (cases) i datafilen. De kan ikke tolkes som oppsummert statistikk for populasjonen. |                                                                                                                                                         |         |             |       |
| # r7dvm2a: Enig/uenig: Tigging bør være forbudt i Norge, østerriksk konstitusjonsdomstol                                             |                                                                                                                                                         |         |             |       |
| Informasjon                                                                                                                          | [Type= diskret] [Format=numeric] [Rekkevidde= 1-7] [Missing=*]                                                                                          |         |             |       |
| Statistikk [NW/ W]                                                                                                                   | [Gyldige=4689 /-] [Ugyldig=0 /-]                                                                                                                        |         |             |       |
| Tekst før spørsmål                                                                                                                   | I løpet av de siste tre årene har den østerrikske konstitusjonsdomstolen kommet til at et forbud mot tigging var et ulovlig inngrep i yttringsfriheten. |         |             |       |
| Spørsmålstekst                                                                                                                       | Hvor enig eller uenig er du i at tigging bør være forbudt i Norge?                                                                                      |         |             |       |
| Instruksjoner til intervjueren                                                                                                       | [Spurt hvis u=2 og ran11=1. ]                                                                                                                           |         |             |       |
| Kommentarer                                                                                                                          | I løpet av de siste tre årene har den østerrikske konstitusjonsdomstolen kommet til at et forbud mot tigging var et ul                                  |         |             |       |
| Verdi                                                                                                                                | Merkelapp                                                                                                                                               | Enheter | Prosent     |       |
| 1                                                                                                                                    | Svært enig                                                                                                                                              | 43      | <div></div> | 0.9%  |
| 2                                                                                                                                    | Enig                                                                                                                                                    | 47      | <div></div> | 1.0%  |
| 3                                                                                                                                    | Noe enig                                                                                                                                                | 38      | <div></div> | 0.8%  |
| 4                                                                                                                                    | Verken enig eller uenig                                                                                                                                 | 30      | <div></div> | 0.6%  |
| 5                                                                                                                                    | Noe uenig                                                                                                                                               | 27      | <div></div> | 0.6%  |
| 6                                                                                                                                    | Uenig                                                                                                                                                   | 27      | <div></div> | 0.6%  |
| 7                                                                                                                                    | Svært uenig                                                                                                                                             | 10      | <div></div> | 0.2%  |
| 97                                                                                                                                   | Ikke svart                                                                                                                                              | 4       | <div></div> | 0.1%  |
| 98                                                                                                                                   | Ikke spurt                                                                                                                                              | 4463    | <div></div> | 95.2% |
| Advarsel: disse tallene indikerer antall enheter (cases) i datafilen. De kan ikke tolkes som oppsummert statistikk for populasjonen. |                                                                                                                                                         |         |             |       |
| # r7dvm2b: Enig/uenig: Tigging bør være forbudt i Norge, amerikanske føderale domstolen                                              |                                                                                                                                                         |         |             |       |
| Informasjon                                                                                                                          | [Type= diskret] [Format=numeric] [Rekkevidde= 1-7] [Missing=*]                                                                                          |         |             |       |
| Statistikk [NW/ W]                                                                                                                   | [Gyldige=4689 /-] [Ugyldig=0 /-]                                                                                                                        |         |             |       |
| Tekst før spørsmål                                                                                                                   | I løpet av de siste tre årene har den amerikanske føderale domstolen kommet til at et forbud mot tigging var et ulovlig inngrep i yttringsfriheten.     |         |             |       |
| Spørsmålstekst                                                                                                                       | Hvor enig eller uenig er du i at tigging bør være forbudt i Norge?                                                                                      |         |             |       |
| Instruksjoner til intervjueren                                                                                                       | [Spurt hvis u=2 og ran11=2. ]                                                                                                                           |         |             |       |
| Kommentarer                                                                                                                          | I løpet av de siste tre årene har den amerikanske føderale domstolen kommet til at et forbud mot tigging var et ulovli                                  |         |             |       |
| Verdi                                                                                                                                | Merkelapp                                                                                                                                               | Enheter | Prosent     |       |
| 1                                                                                                                                    | Svært enig                                                                                                                                              | 43      | <div></div> | 0.9%  |
| 2                                                                                                                                    | Enig                                                                                                                                                    | 28      | <div></div> | 0.6%  |
| 3                                                                                                                                    | Noe enig                                                                                                                                                | 46      | <div></div> | 1.0%  |
| 4                                                                                                                                    | Verken enig eller uenig                                                                                                                                 | 24      | <div></div> | 0.5%  |
| 5                                                                                                                                    | Noe uenig                                                                                                                                               | 13      | <div></div> | 0.3%  |
| 6                                                                                                                                    | Uenig                                                                                                                                                   | 24      | <div></div> | 0.5%  |
| 7                                                                                                                                    | Svært uenig                                                                                                                                             | 16      | <div></div> | 0.3%  |
| 97                                                                                                                                   | Ikke svart                                                                                                                                              | 1       | <div></div> | 0.0%  |
| 98                                                                                                                                   | Ikke spurt                                                                                                                                              | 4494    | <div></div> | 95.8% |
| Advarsel: disse tallene indikerer antall enheter (cases) i datafilen. De kan ikke tolkes som oppsummert statistikk for populasjonen. |                                                                                                                                                         |         |             |       |

| # r7dvm2c: Enig/uenig: Tigging bør være forbudt i Norge                                                                              |                                                                                                                                                                                                                                                                                                                                                                                                                                                                               |         |             |       |
|--------------------------------------------------------------------------------------------------------------------------------------|-------------------------------------------------------------------------------------------------------------------------------------------------------------------------------------------------------------------------------------------------------------------------------------------------------------------------------------------------------------------------------------------------------------------------------------------------------------------------------|---------|-------------|-------|
| Informasjon                                                                                                                          | [Type= diskret] [Format=numeric] [Rekkevidde= 1-7] [Missing=*]                                                                                                                                                                                                                                                                                                                                                                                                                |         |             |       |
| Statistikk [NW/ W]                                                                                                                   | [Gyldige=4689 /-] [Ugyldig=0 /-]                                                                                                                                                                                                                                                                                                                                                                                                                                              |         |             |       |
| Spørsmålstekst                                                                                                                       | Hvor enig eller uenig er du i at tigging bør være forbudt i Norge?                                                                                                                                                                                                                                                                                                                                                                                                            |         |             |       |
| Instruksjoner til intervjueren                                                                                                       | [Spurt hvis u=2 og ran11=3. ]                                                                                                                                                                                                                                                                                                                                                                                                                                                 |         |             |       |
| Verdi                                                                                                                                | Merkelapp                                                                                                                                                                                                                                                                                                                                                                                                                                                                     | Enheter | Prosent     |       |
| 1                                                                                                                                    | Svært enig                                                                                                                                                                                                                                                                                                                                                                                                                                                                    | 51      | <div></div> | 1.1%  |
| 2                                                                                                                                    | Enig                                                                                                                                                                                                                                                                                                                                                                                                                                                                          | 42      | <div></div> | 0.9%  |
| 3                                                                                                                                    | Noe enig                                                                                                                                                                                                                                                                                                                                                                                                                                                                      | 39      | <div></div> | 0.8%  |
| 4                                                                                                                                    | Verken enig eller uenig                                                                                                                                                                                                                                                                                                                                                                                                                                                       | 22      | <div></div> | 0.5%  |
| 5                                                                                                                                    | Noe uenig                                                                                                                                                                                                                                                                                                                                                                                                                                                                     | 17      | <div></div> | 0.4%  |
| 6                                                                                                                                    | Uenig                                                                                                                                                                                                                                                                                                                                                                                                                                                                         | 21      | <div></div> | 0.4%  |
| 7                                                                                                                                    | Svært uenig                                                                                                                                                                                                                                                                                                                                                                                                                                                                   | 17      | <div></div> | 0.4%  |
| 97                                                                                                                                   | Ikke svart                                                                                                                                                                                                                                                                                                                                                                                                                                                                    | 1       | <div></div> | 0.0%  |
| 98                                                                                                                                   | Ikke spurt                                                                                                                                                                                                                                                                                                                                                                                                                                                                    | 4479    | <div></div> | 95.5% |
| Advarsel: disse tallene indikerer antall enheter (cases) i datafilen. De kan ikke tolkes som oppsummert statistikk for populasjonen. |                                                                                                                                                                                                                                                                                                                                                                                                                                                                               |         |             |       |
| # r7ran12: [Randomiserer hvis u=2. ]                                                                                                 |                                                                                                                                                                                                                                                                                                                                                                                                                                                                               |         |             |       |
| Informasjon                                                                                                                          | [Type= diskret] [Format=numeric] [Rekkevidde= 1-9] [Missing=*]                                                                                                                                                                                                                                                                                                                                                                                                                |         |             |       |
| Statistikk [NW/ W]                                                                                                                   | [Gyldige=1179 /-] [Ugyldig=3510 /-]                                                                                                                                                                                                                                                                                                                                                                                                                                           |         |             |       |
| Instruksjoner til intervjueren                                                                                                       | [Randomiserer hvis u=2. ]                                                                                                                                                                                                                                                                                                                                                                                                                                                     |         |             |       |
| Verdi                                                                                                                                | Merkelapp                                                                                                                                                                                                                                                                                                                                                                                                                                                                     | Enheter | Prosent     |       |
| 1                                                                                                                                    | 1                                                                                                                                                                                                                                                                                                                                                                                                                                                                             | 130     | <div></div> | 11.0% |
| 2                                                                                                                                    | 2                                                                                                                                                                                                                                                                                                                                                                                                                                                                             | 136     | <div></div> | 11.5% |
| 3                                                                                                                                    | 3                                                                                                                                                                                                                                                                                                                                                                                                                                                                             | 129     | <div></div> | 10.9% |
| 4                                                                                                                                    | 4                                                                                                                                                                                                                                                                                                                                                                                                                                                                             | 138     | <div></div> | 11.7% |
| 5                                                                                                                                    | 5                                                                                                                                                                                                                                                                                                                                                                                                                                                                             | 132     | <div></div> | 11.2% |
| 6                                                                                                                                    | 6                                                                                                                                                                                                                                                                                                                                                                                                                                                                             | 134     | <div></div> | 11.4% |
| 7                                                                                                                                    | 7                                                                                                                                                                                                                                                                                                                                                                                                                                                                             | 126     | <div></div> | 10.7% |
| 8                                                                                                                                    | 8                                                                                                                                                                                                                                                                                                                                                                                                                                                                             | 119     | <div></div> | 10.1% |
| 9                                                                                                                                    | 9                                                                                                                                                                                                                                                                                                                                                                                                                                                                             | 135     | <div></div> | 11.5% |
| Sysmiss                                                                                                                              |                                                                                                                                                                                                                                                                                                                                                                                                                                                                               | 3510    |             |       |
| Advarsel: disse tallene indikerer antall enheter (cases) i datafilen. De kan ikke tolkes som oppsummert statistikk for populasjonen. |                                                                                                                                                                                                                                                                                                                                                                                                                                                                               |         |             |       |
| # r7dv13a: Ville skrevet under: Kampanje mot nedleggelse av lokal legevaktteneste, 1% skrevet under, folk du kjenner/respekterer     |                                                                                                                                                                                                                                                                                                                                                                                                                                                                               |         |             |       |
| Informasjon                                                                                                                          | [Type= diskret] [Format=numeric] [Rekkevidde= 1-2] [Missing=*]                                                                                                                                                                                                                                                                                                                                                                                                                |         |             |       |
| Statistikk [NW/ W]                                                                                                                   | [Gyldige=4689 /-] [Ugyldig=0 /-]                                                                                                                                                                                                                                                                                                                                                                                                                                              |         |             |       |
| Tekst før spørsmål                                                                                                                   | Tenk deg følgende situasjon: Politikerne planlegger å legge ned legevakttenesten som ligger nærmest deg for i stedet å utvide kapasiteten på nærmeste sykehus. Dette betyr at du vil få lengre reisetid om du skulle trenge øyeblikkelig legehjelp. Det har blitt etablert en underskriftskampanje mot nedleggelsen, og denne er offentliggjort på internett. Ca. 1 % av de som bor i kommunen din har skrevet under oppropet, deriblant mennesker du kjenner og respekterer. |         |             |       |
| Spørsmålstekst                                                                                                                       | Ville du ha skrevet under?                                                                                                                                                                                                                                                                                                                                                                                                                                                    |         |             |       |
| Instruksjoner til intervjueren                                                                                                       | [Spurt hvis u=2 og ran12=1. ]                                                                                                                                                                                                                                                                                                                                                                                                                                                 |         |             |       |

**# r7dv13a: Ville skrevet under: Kampanje mot nedleggelse av lokal legevaktteneste, 1% skrevet under, folk du kjenner/respekterer**

| Verdi | Merkelapp  | Enheter | Prosent |
|-------|------------|---------|---------|
| 1     | Ja         | 80      | 1.7%    |
| 2     | Nei        | 49      | 1.0%    |
| 97    | Ikke svart | 1       | 0.0%    |
| 98    | Ikke spurt | 4559    | 97.2%   |

Advarsel: disse tallene indikerer antall enheter (cases) i datafilen. De kan ikke tolkes som oppsummert statistikk for populasjonen.

**# r7dv13b: Ville skrevet under: Kampanje mot nedleggelse av lokal legevaktteneste, 1% skrevet under, folk du ikke er enig med politisk**

|                                       |                                                                                                                                                                                                                                                                                                                                                                                                                                                                                                |
|---------------------------------------|------------------------------------------------------------------------------------------------------------------------------------------------------------------------------------------------------------------------------------------------------------------------------------------------------------------------------------------------------------------------------------------------------------------------------------------------------------------------------------------------|
| <b>Informasjon</b>                    | [Type= diskret] [Format=numeric] [Rekkevidde= 1-2] [Missing=*]                                                                                                                                                                                                                                                                                                                                                                                                                                 |
| <b>Statistikk [NW/ W]</b>             | [Gyldige=4689 /-] [Ugyldig=0 /-]                                                                                                                                                                                                                                                                                                                                                                                                                                                               |
| <b>Tekst før spørsmål</b>             | Tenk deg følgende situasjon: Politikerne planlegger å legge ned legevakttenesten som ligger nærmest deg for i stedet å utvide kapasiteten på nærmeste sykehus. Dette betyr at du vil få lengre reisetid om du skulle trenge øyeblikkelig legehjelp. Det har blitt etablert en underskriftskampanje mot nedleggelsen, og denne er offentliggjort på internett. Ca. 1 % av de som bor i kommunen din har skrevet under oppropet, deriblant mennesker som du vanligvis ikke er enig med politisk. |
| <b>Spørsmålstekst</b>                 | Ville du ha skrevet under?                                                                                                                                                                                                                                                                                                                                                                                                                                                                     |
| <b>Instruksjoner til intervjueren</b> | [Spurt hvis u=2 og ran12=2. ]                                                                                                                                                                                                                                                                                                                                                                                                                                                                  |

| Verdi | Merkelapp  | Enheter | Prosent |
|-------|------------|---------|---------|
| 1     | Ja         | 98      | 2.1%    |
| 2     | Nei        | 34      | 0.7%    |
| 97    | Ikke svart | 4       | 0.1%    |
| 98    | Ikke spurt | 4553    | 97.1%   |

Advarsel: disse tallene indikerer antall enheter (cases) i datafilen. De kan ikke tolkes som oppsummert statistikk for populasjonen.

**# r7dv13c: Ville skrevet under: Kampanje mot nedleggelse av lokal legevaktteneste, 10% skrevet under, folk du kjenner/respekterer**

|                                       |                                                                                                                                                                                                                                                                                                                                                                                                                                                                                |
|---------------------------------------|--------------------------------------------------------------------------------------------------------------------------------------------------------------------------------------------------------------------------------------------------------------------------------------------------------------------------------------------------------------------------------------------------------------------------------------------------------------------------------|
| <b>Informasjon</b>                    | [Type= diskret] [Format=numeric] [Rekkevidde= 1-2] [Missing=*]                                                                                                                                                                                                                                                                                                                                                                                                                 |
| <b>Statistikk [NW/ W]</b>             | [Gyldige=4689 /-] [Ugyldig=0 /-]                                                                                                                                                                                                                                                                                                                                                                                                                                               |
| <b>Tekst før spørsmål</b>             | Tenk deg følgende situasjon: Politikerne planlegger å legge ned legevakttenesten som ligger nærmest deg for i stedet å utvide kapasiteten på nærmeste sykehus. Dette betyr at du vil få lengre reisetid om du skulle trenge øyeblikkelig legehjelp. Det har blitt etablert en underskriftskampanje mot nedleggelsen, og denne er offentliggjort på internett. Ca. 10 % av de som bor i kommunen din har skrevet under oppropet, deriblant mennesker du kjenner og respekterer. |
| <b>Spørsmålstekst</b>                 | Ville du ha skrevet under?                                                                                                                                                                                                                                                                                                                                                                                                                                                     |
| <b>Instruksjoner til intervjueren</b> | [Spurt hvis u=2 og ran12=3. ]                                                                                                                                                                                                                                                                                                                                                                                                                                                  |

| Verdi | Merkelapp  | Enheter | Prosent |
|-------|------------|---------|---------|
| 1     | Ja         | 80      | 1.7%    |
| 2     | Nei        | 45      | 1.0%    |
| 97    | Ikke svart | 4       | 0.1%    |
| 98    | Ikke spurt | 4560    | 97.2%   |

Advarsel: disse tallene indikerer antall enheter (cases) i datafilen. De kan ikke tolkes som oppsummert statistikk for populasjonen.

**# r7dv13d: Ville skrevet under: Kampanje mot nedleggelse av lokal legevaktteneste, 10% skrevet under, folk du ikke er enig med politisk**

|                           |                                                                                                                                                                                                                                                     |
|---------------------------|-----------------------------------------------------------------------------------------------------------------------------------------------------------------------------------------------------------------------------------------------------|
| <b>Informasjon</b>        | [Type= diskret] [Format=numeric] [Rekkevidde= 1-2] [Missing=*]                                                                                                                                                                                      |
| <b>Statistikk [NW/ W]</b> | [Gyldige=4689 /-] [Ugyldig=0 /-]                                                                                                                                                                                                                    |
| <b>Tekst før spørsmål</b> | Tenk deg følgende situasjon: Politikerne planlegger å legge ned legevakttenesten som ligger nærmest deg for i stedet å utvide kapasiteten på nærmeste sykehus. Dette betyr at du vil få lengre reisetid om du skulle trenge øyeblikkelig legehjelp. |

**# r7dv13d: Ville skrevet under: Kampanje mot nedleggelse av lokal legevaktjeneste, 10% skrevet under, folk du ikke er enig med politisk**

Det har blitt etablert en underskriftskampanje mot nedleggelsen, og denne er offentliggjort på internett. Ca. 10 % av de som bor i kommunen din har skrevet under oppropet, deriblant mennesker som du vanligvis ikke er enig med politisk.

**Spørsmålstekst** Ville du ha skrevet under?

**Instruksjoner til intervjueren** [Spurt hvis u=2 og ran12=4. ]

| Verdi | Merkelapp  | Enheter | Prosent |
|-------|------------|---------|---------|
| 1     | Ja         | 95      | 2.0%    |
| 2     | Nei        | 41      | 0.9%    |
| 97    | Ikke svart | 2       | 0.0%    |
| 98    | Ikke spurt | 4551    | 97.1%   |

Advarsel: disse tallene indikerer antall enheter (cases) i datafilen. De kan ikke tolkes som oppsummert statistikk for populasjonen.

**# r7dv13e: Ville skrevet under: Kampanje mot nedleggelse av lokal legevaktjeneste, 30% skrevet under, folk du kjenner/respekterer**

**Informasjon** [Type= diskret] [Format=numeric] [Rekkevidde= 1-2] [Missing=\*]

**Statistikk [NW/ W]** [Gyldige=4689 /-] [Ugyldig=0 /-]

**Tekst før spørsmål** Tenk deg følgende situasjon: Politikerne planlegger å legge ned legevaktjenesten som ligger nærmest deg for i stedet å utvide kapasiteten på nærmeste sykehus. Dette betyr at du vil få lengre reisetid om du skulle trenge øyeblikkelig legehjelp. Det har blitt etablert en underskriftskampanje mot nedleggelsen, og denne er offentliggjort på internett. Ca. 30 % av de som bor i kommunen din har skrevet under oppropet, deriblant mennesker du kjenner og respekterer.

**Spørsmålstekst** Ville du ha skrevet under?

**Instruksjoner til intervjueren** [Spurt hvis u=2 og ran12=5. ]

| Verdi | Merkelapp  | Enheter | Prosent |
|-------|------------|---------|---------|
| 1     | Ja         | 88      | 1.9%    |
| 2     | Nei        | 42      | 0.9%    |
| 97    | Ikke svart | 2       | 0.0%    |
| 98    | Ikke spurt | 4557    | 97.2%   |

Advarsel: disse tallene indikerer antall enheter (cases) i datafilen. De kan ikke tolkes som oppsummert statistikk for populasjonen.

**# r7dv13f: Ville skrevet under: Kampanje mot nedleggelse av lokal legevaktjeneste, 30% skrevet under, folk du ikke er enig med politisk**

**Informasjon** [Type= diskret] [Format=numeric] [Rekkevidde= 1-2] [Missing=\*]

**Statistikk [NW/ W]** [Gyldige=4689 /-] [Ugyldig=0 /-]

**Tekst før spørsmål** Tenk deg følgende situasjon: Politikerne planlegger å legge ned legevaktjenesten som ligger nærmest deg for i stedet å utvide kapasiteten på nærmeste sykehus. Dette betyr at du vil få lengre reisetid om du skulle trenge øyeblikkelig legehjelp. Det har blitt etablert en underskriftskampanje mot nedleggelsen, og denne er offentliggjort på internett. Ca. 30 % av de som bor i kommunen din har skrevet under oppropet, deriblant mennesker som du vanligvis ikke er enig med politisk.

**Spørsmålstekst** Ville du ha skrevet under?

**Instruksjoner til intervjueren** [Spurt hvis u=2 og ran12=6. ]

| Verdi | Merkelapp  | Enheter | Prosent |
|-------|------------|---------|---------|
| 1     | Ja         | 107     | 2.3%    |
| 2     | Nei        | 26      | 0.6%    |
| 97    | Ikke svart | 1       | 0.0%    |
| 98    | Ikke spurt | 4555    | 97.1%   |

Advarsel: disse tallene indikerer antall enheter (cases) i datafilen. De kan ikke tolkes som oppsummert statistikk for populasjonen.



| # r7dv13g: Ville skrevet under: Kampanje mot nedleggelse av lokal legevaktteneste, 1% skrevet under                                  |                                                                                                                                                                                                                                                                                                                                                                                                                                 |         |         |
|--------------------------------------------------------------------------------------------------------------------------------------|---------------------------------------------------------------------------------------------------------------------------------------------------------------------------------------------------------------------------------------------------------------------------------------------------------------------------------------------------------------------------------------------------------------------------------|---------|---------|
| Informasjon                                                                                                                          | [Type= diskret] [Format=numeric] [Rekkevidde= 1-2] [Missing=*]                                                                                                                                                                                                                                                                                                                                                                  |         |         |
| Statistikk [NW/ W]                                                                                                                   | [Gyldige=4689 /-] [Ugyldig=0 /-]                                                                                                                                                                                                                                                                                                                                                                                                |         |         |
| Tekst før spørsmål                                                                                                                   | Tenk deg følgende situasjon: Politikerne planlegger å legge ned legevakttenesten som ligger nærmest deg for i stedet å utvide kapasiteten på nærmeste sykehus. Dette betyr at du vil få lengre reisetid om du skulle trenge øyeblikkelig legehjelp. Det har blitt etablert en underskriftskampanje mot nedleggelsen, og denne er offentliggjort på internett. Ca. 1 % av de som bor i kommunen din har skrevet under oppropet.  |         |         |
| Spørsmålstekst                                                                                                                       | Ville du ha skrevet under?                                                                                                                                                                                                                                                                                                                                                                                                      |         |         |
| Instruksjoner til intervjueren                                                                                                       | [Spurt hvis u=2 og ran12=7. ]                                                                                                                                                                                                                                                                                                                                                                                                   |         |         |
| Verdi                                                                                                                                | Merkelapp                                                                                                                                                                                                                                                                                                                                                                                                                       | Enheter | Prosent |
| 1                                                                                                                                    | Ja                                                                                                                                                                                                                                                                                                                                                                                                                              | 71      | 1.5%    |
| 2                                                                                                                                    | Nei                                                                                                                                                                                                                                                                                                                                                                                                                             | 54      | 1.2%    |
| 97                                                                                                                                   | Ikke svart                                                                                                                                                                                                                                                                                                                                                                                                                      | 1       | 0.0%    |
| 98                                                                                                                                   | Ikke spurt                                                                                                                                                                                                                                                                                                                                                                                                                      | 4563    | 97.3%   |
| Advarsel: disse tallene indikerer antall enheter (cases) i datafilen. De kan ikke tolkes som oppsummert statistikk for populasjonen. |                                                                                                                                                                                                                                                                                                                                                                                                                                 |         |         |
| # r7dv13h: Ville skrevet under: Kampanje mot nedleggelse av lokal legevaktteneste, 10% skrevet under                                 |                                                                                                                                                                                                                                                                                                                                                                                                                                 |         |         |
| Informasjon                                                                                                                          | [Type= diskret] [Format=numeric] [Rekkevidde= 1-2] [Missing=*]                                                                                                                                                                                                                                                                                                                                                                  |         |         |
| Statistikk [NW/ W]                                                                                                                   | [Gyldige=4689 /-] [Ugyldig=0 /-]                                                                                                                                                                                                                                                                                                                                                                                                |         |         |
| Tekst før spørsmål                                                                                                                   | Tenk deg følgende situasjon: Politikerne planlegger å legge ned legevakttenesten som ligger nærmest deg for i stedet å utvide kapasiteten på nærmeste sykehus. Dette betyr at du vil få lengre reisetid om du skulle trenge øyeblikkelig legehjelp. Det har blitt etablert en underskriftskampanje mot nedleggelsen, og denne er offentliggjort på internett. Ca. 10 % av de som bor i kommunen din har skrevet under oppropet. |         |         |
| Spørsmålstekst                                                                                                                       | Ville du ha skrevet under?                                                                                                                                                                                                                                                                                                                                                                                                      |         |         |
| Instruksjoner til intervjueren                                                                                                       | [Spurt hvis u=2 og ran12=8. ]                                                                                                                                                                                                                                                                                                                                                                                                   |         |         |
| Verdi                                                                                                                                | Merkelapp                                                                                                                                                                                                                                                                                                                                                                                                                       | Enheter | Prosent |
| 1                                                                                                                                    | Ja                                                                                                                                                                                                                                                                                                                                                                                                                              | 70      | 1.5%    |
| 2                                                                                                                                    | Nei                                                                                                                                                                                                                                                                                                                                                                                                                             | 48      | 1.0%    |
| 97                                                                                                                                   | Ikke svart                                                                                                                                                                                                                                                                                                                                                                                                                      | 1       | 0.0%    |
| 98                                                                                                                                   | Ikke spurt                                                                                                                                                                                                                                                                                                                                                                                                                      | 4570    | 97.5%   |
| Advarsel: disse tallene indikerer antall enheter (cases) i datafilen. De kan ikke tolkes som oppsummert statistikk for populasjonen. |                                                                                                                                                                                                                                                                                                                                                                                                                                 |         |         |

# r7dv13i: Ville skrevet under: Kampanje mot nedleggelse av lokal legevaktteneste, 30% skrevet under

Informasjon

[Type= diskret] [Format=numeric] [Rekkevidde= 1-2] [Missing=\*]

Statistikk [NW/ W]

[Gyldige=4689 /-] [Ugyldig=0 /-]

Tekst før spørsmål

Tenk deg følgende situasjon: Politikerne planlegger å legge ned legevakttenesten som ligger nærmest deg for i stedet å utvide kapasiteten på nærmeste sykehus. Dette betyr at du vil få lengre reisetid om du skulle trenge øyeblikkelig legehjelp. Det har blitt etablert en underskriftskampanje mot nedleggelsen, og denne er offentliggjort på internett. Ca. 30 % av de som bor i kommunen din har skrevet under oppropet.

Spørsmålstekst

Ville du ha skrevet under?

Instruksjoner til intervjueren

[Spurt hvis u=2 og ran12=9. ]

| Verdi | Merkelapp  | Enheter | Prosent           |
|-------|------------|---------|-------------------|
| 1     | Ja         | 92      | <div></div> 2.0%  |
| 2     | Nei        | 40      | <div></div> 0.9%  |
| 97    | Ikke svart | 3       | <div></div> 0.1%  |
| 98    | Ikke spurt | 4554    | <div></div> 97.1% |

Advarsel: disse tallene indikerer antall enheter (cases) i datafilen. De kan ikke tolkes som oppsummert statistikk for populasjonen.

# r7dv13\_2: Sannsynlighet for at en slik aksjon ville vinne frem

Informasjon

[Type= diskret] [Format=numeric] [Rekkevidde= 1-5] [Missing=\*]

Statistikk [NW/ W]

[Gyldige=4689 /-] [Ugyldig=0 /-]

Spørsmålstekst

Hvordan vurderer du sannsynligheten for at en slik aksjon ville vinne frem?

Instruksjoner til intervjueren

[Spurt hvis u=2. ]

| Verdi | Merkelapp                       | Enheter | Prosent           |
|-------|---------------------------------|---------|-------------------|
| 1     | Svært sannsynlig                | 18      | <div></div> 0.4%  |
| 2     | Sannsynlig                      | 91      | <div></div> 1.9%  |
| 3     | Noe sannsynlig                  | 416     | <div></div> 8.9%  |
| 4     | Lite sannsynlig                 | 562     | <div></div> 12.0% |
| 5     | Ikke sannsynlig i det hele tatt | 79      | <div></div> 1.7%  |
| 97    | Ikke svart                      | 33      | <div></div> 0.7%  |
| 98    | Ikke spurt                      | 3490    | <div></div> 74.4% |

Advarsel: disse tallene indikerer antall enheter (cases) i datafilen. De kan ikke tolkes som oppsummert statistikk for populasjonen.

# r7dv13\_3: Har deltatt i en underskriftsaksjon på internett

Informasjon

[Type= diskret] [Format=numeric] [Rekkevidde= 1-3] [Missing=\*]

Statistikk [NW/ W]

[Gyldige=4689 /-] [Ugyldig=0 /-]

Spørsmålstekst

Har du noen ganger selv deltatt i en underskriftsaksjon på internett?

Instruksjoner til intervjueren

[Spurt hvis u=2. ]

| Verdi | Merkelapp        | Enheter | Prosent           |
|-------|------------------|---------|-------------------|
| 1     | Ja, flere ganger | 327     | <div></div> 7.0%  |
| 2     | Ja, en gang      | 184     | <div></div> 3.9%  |
| 3     | Nei              | 658     | <div></div> 14.0% |
| 97    | Ikke svart       | 30      | <div></div> 0.6%  |
| 98    | Ikke spurt       | 3490    | <div></div> 74.4% |

Advarsel: disse tallene indikerer antall enheter (cases) i datafilen. De kan ikke tolkes som oppsummert statistikk for populasjonen.

# r7dv13\_3b: Hva handlet den siste aksjonen du deltok i om? [anonymisert]

Informasjon

[Type= diskret] [Format=character] [Missing=\*]

| # r7dv13_3b: Hva handlet den siste aksjonen du deltok i om? [anonymisert]                                                            |                                                                                                                      |         |                    |
|--------------------------------------------------------------------------------------------------------------------------------------|----------------------------------------------------------------------------------------------------------------------|---------|--------------------|
| Statistikk [NW/ W]                                                                                                                   | [Gyldige=4689 /-] [Ugyldig=0 /-]                                                                                     |         |                    |
| Spørsmålstekst                                                                                                                       | Hva handlet den siste aksjonen du deltok i om?                                                                       |         |                    |
| Instruksjoner til intervjueren                                                                                                       | [Spurt hvis u=2 og R7DV13_3=1. ]<br>[Data tilbakeholdt av hensyn til anonymitet]                                     |         |                    |
| Verdi                                                                                                                                | Merkelapp                                                                                                            | Enheter | Prosent            |
|                                                                                                                                      |                                                                                                                      | 4689    | <div></div> 100.0% |
| Advarsel: disse tallene indikerer antall enheter (cases) i datafilen. De kan ikke tolkes som oppsummert statistikk for populasjonen. |                                                                                                                      |         |                    |
| # r7dv13_3c: Hva handlet aksjonen du deltok i om? [anonymisert]                                                                      |                                                                                                                      |         |                    |
| Informasjon                                                                                                                          | [Type= diskret] [Format=character] [Missing=*]                                                                       |         |                    |
| Statistikk [NW/ W]                                                                                                                   | [Gyldige=4689 /-] [Ugyldig=0 /-]                                                                                     |         |                    |
| Spørsmålstekst                                                                                                                       | Hva handlet aksjonen du deltok i om?                                                                                 |         |                    |
| Instruksjoner til intervjueren                                                                                                       | [Spurt hvis u=2 og R7DV13_3=2. ]<br>[Data tilbakeholdt av hensyn til anonymitet]                                     |         |                    |
| Verdi                                                                                                                                | Merkelapp                                                                                                            | Enheter | Prosent            |
|                                                                                                                                      |                                                                                                                      | 4689    | <div></div> 100.0% |
| Advarsel: disse tallene indikerer antall enheter (cases) i datafilen. De kan ikke tolkes som oppsummert statistikk for populasjonen. |                                                                                                                      |         |                    |
| # r7ran6: [Randomiserer hvis u=2. ]                                                                                                  |                                                                                                                      |         |                    |
| Informasjon                                                                                                                          | [Type= diskret] [Format=numeric] [Rekkevidde= 1-6] [Missing=*]                                                       |         |                    |
| Statistikk [NW/ W]                                                                                                                   | [Gyldige=1178 /-] [Ugyldig=3511 /-]                                                                                  |         |                    |
| Instruksjoner til intervjueren                                                                                                       | [Randomiserer hvis u=2. ]                                                                                            |         |                    |
| Verdi                                                                                                                                | Merkelapp                                                                                                            | Enheter | Prosent            |
| 1                                                                                                                                    | 1                                                                                                                    | 187     | <div></div> 15.9%  |
| 2                                                                                                                                    | 2                                                                                                                    | 221     | <div></div> 18.8%  |
| 3                                                                                                                                    | 3                                                                                                                    | 199     | <div></div> 16.9%  |
| 4                                                                                                                                    | 4                                                                                                                    | 195     | <div></div> 16.6%  |
| 5                                                                                                                                    | 5                                                                                                                    | 185     | <div></div> 15.7%  |
| 6                                                                                                                                    | 6                                                                                                                    | 191     | <div></div> 16.2%  |
| Sysmiss                                                                                                                              |                                                                                                                      | 3511    |                    |
| Advarsel: disse tallene indikerer antall enheter (cases) i datafilen. De kan ikke tolkes som oppsummert statistikk for populasjonen. |                                                                                                                      |         |                    |
| # r7mi5_1: Enig/uenig: Lærebøker i grunnskolen bør skrives, mer vekt på det nye kulturelle mangfoldet                                |                                                                                                                      |         |                    |
| Informasjon                                                                                                                          | [Type= diskret] [Format=numeric] [Rekkevidde= 1-7] [Missing=*]                                                       |         |                    |
| Statistikk [NW/ W]                                                                                                                   | [Gyldige=4689 /-] [Ugyldig=0 /-]                                                                                     |         |                    |
| Tekst før spørsmål                                                                                                                   | Hvor enig eller uenig er du i følgende utsagn:                                                                       |         |                    |
| Spørsmålstekst                                                                                                                       | Lærebøker i grunnskolen bør skrives slik at de legger mer vekt på det nye kulturelle mangfoldet i Norge.             |         |                    |
| Instruksjoner til intervjueren                                                                                                       | [Spurt hvis u=2 og ran6=1. ]                                                                                         |         |                    |
| Kommentarer                                                                                                                          | Hvor enig eller uenig er du i følgende utsagn: Lærebøker i grunnskolen bør skrives slik at de legger mer vekt på det |         |                    |
| Verdi                                                                                                                                | Merkelapp                                                                                                            | Enheter | Prosent            |
| 1                                                                                                                                    | Svært enig                                                                                                           | 11      | <div></div> 0.2%   |
| 2                                                                                                                                    | Enig                                                                                                                 | 38      | <div></div> 0.8%   |
| 3                                                                                                                                    | Noe enig                                                                                                             | 47      | <div></div> 1.0%   |

| # r7mi5_1: Enig/uenig: Lærebøker i grunnskolen bør skrives, mer vekt på det nye kulturelle mangfoldet                                |                                                                                                                       |         |         |
|--------------------------------------------------------------------------------------------------------------------------------------|-----------------------------------------------------------------------------------------------------------------------|---------|---------|
| Verdi                                                                                                                                | Merkelapp                                                                                                             | Enheter | Prosent |
| 4                                                                                                                                    | Verken enig eller uenig                                                                                               | 34      | 0.7%    |
| 5                                                                                                                                    | Noe uenig                                                                                                             | 16      | 0.3%    |
| 6                                                                                                                                    | Uenig                                                                                                                 | 25      | 0.5%    |
| 7                                                                                                                                    | Svært uenig                                                                                                           | 13      | 0.3%    |
| 97                                                                                                                                   | Ikke svart                                                                                                            | 3       | 0.1%    |
| 98                                                                                                                                   | Ikke spurt                                                                                                            | 4502    | 96.0%   |
| Advarsel: disse tallene indikerer antall enheter (cases) i datafilen. De kan ikke tolkes som oppsummert statistikk for populasjonen. |                                                                                                                       |         |         |
| # r7mi5_2: Enig/uenig: Lærebøker i grunnskolen bør skrives slik at de reflekterer det nye kulturelle mangfoldet                      |                                                                                                                       |         |         |
| Informasjon                                                                                                                          | [Type= diskret] [Format=numeric] [Rekkevidde= 1-7] [Missing=*]                                                        |         |         |
| Statistikk [NW/ W]                                                                                                                   | [Gyldige=4689 /-] [Ugyldig=0 /-]                                                                                      |         |         |
| Tekst før spørsmål                                                                                                                   | Hvor enig eller uenig er du i følgende utsagn:                                                                        |         |         |
| Spørsmålstekst                                                                                                                       | Lærebøker i grunnskolen bør skrives slik at de reflekterer det nye kulturelle mangfoldet i Norge                      |         |         |
| Instruksjoner til intervjueren                                                                                                       | [Spurt hvis u=2 og ran6=2. ]                                                                                          |         |         |
| Kommentarer                                                                                                                          | Hvor enig eller uenig er du i følgende utsagn: Lærebøker i grunnskolen bør skrives slik at de reflekterer det nye kul |         |         |
| Verdi                                                                                                                                | Merkelapp                                                                                                             | Enheter | Prosent |
| 1                                                                                                                                    | Svært enig                                                                                                            | 34      | 0.7%    |
| 2                                                                                                                                    | Enig                                                                                                                  | 65      | 1.4%    |
| 3                                                                                                                                    | Noe enig                                                                                                              | 52      | 1.1%    |
| 4                                                                                                                                    | Verken enig eller uenig                                                                                               | 30      | 0.6%    |
| 5                                                                                                                                    | Noe uenig                                                                                                             | 15      | 0.3%    |
| 6                                                                                                                                    | Uenig                                                                                                                 | 13      | 0.3%    |
| 7                                                                                                                                    | Svært uenig                                                                                                           | 12      | 0.3%    |
| 97                                                                                                                                   | Ikke svart                                                                                                            | 0       |         |
| 98                                                                                                                                   | Ikke spurt                                                                                                            | 4468    | 95.3%   |
| Advarsel: disse tallene indikerer antall enheter (cases) i datafilen. De kan ikke tolkes som oppsummert statistikk for populasjonen. |                                                                                                                       |         |         |
| # r7mi5_3: Enig/uenig: Lærebøker i grunnskolen bør skrives slik at de legger mindre vekt på nye ideer om det kulturelle mangfoldet   |                                                                                                                       |         |         |
| Informasjon                                                                                                                          | [Type= diskret] [Format=numeric] [Rekkevidde= 1-7] [Missing=*]                                                        |         |         |
| Statistikk [NW/ W]                                                                                                                   | [Gyldige=4689 /-] [Ugyldig=0 /-]                                                                                      |         |         |
| Tekst før spørsmål                                                                                                                   | Hvor enig eller uenig er du i følgende utsagn:                                                                        |         |         |
| Spørsmålstekst                                                                                                                       | Lærebøker i grunnskolen bør skrives slik at de legger mindre vekt på nye ideer om kulturelt mangfold i Norge          |         |         |
| Instruksjoner til intervjueren                                                                                                       | [Spurt hvis u=2 og ran6=3. ]                                                                                          |         |         |
| Kommentarer                                                                                                                          | Hvor enig eller uenig er du i følgende utsagn: Lærebøker i grunnskolen bør skrives slik at de legger mindre vekt på   |         |         |
| Verdi                                                                                                                                | Merkelapp                                                                                                             | Enheter | Prosent |
| 1                                                                                                                                    | Svært enig                                                                                                            | 5       | 0.1%    |
| 2                                                                                                                                    | Enig                                                                                                                  | 11      | 0.2%    |
| 3                                                                                                                                    | Noe enig                                                                                                              | 26      | 0.6%    |
| 4                                                                                                                                    | Verken enig eller uenig                                                                                               | 54      | 1.2%    |
| 5                                                                                                                                    | Noe uenig                                                                                                             | 30      | 0.6%    |
| 6                                                                                                                                    | Uenig                                                                                                                 | 46      | 1.0%    |
| 7                                                                                                                                    | Svært uenig                                                                                                           | 24      | 0.5%    |

| # r7mi5_3: Enig/uenig: Lærebøker i grunnskolen bør skrives slik at de legger mindre vekt på nye ideer om det kulturelle mangfoldet   |                                                                                                                       |         |         |
|--------------------------------------------------------------------------------------------------------------------------------------|-----------------------------------------------------------------------------------------------------------------------|---------|---------|
| Verdi                                                                                                                                | Merkelapp                                                                                                             | Enheter | Prosent |
| 97                                                                                                                                   | Ikke svart                                                                                                            | 3       | 0.1%    |
| 98                                                                                                                                   | Ikke spurt                                                                                                            | 4490    | 95.8%   |
| Advarsel: disse tallene indikerer antall enheter (cases) i datafilen. De kan ikke tolkes som oppsummert statistikk for populasjonen. |                                                                                                                       |         |         |
| # r7mi5_4: Enig/uenig: Lærebøker i grunnskolen bør omskrives, mer vekt på det nye kulturelle mangfoldet                              |                                                                                                                       |         |         |
| Informasjon                                                                                                                          | [Type= diskret] [Format=numeric] [Rekkevidde= 1-7] [Missing=*]                                                        |         |         |
| Statistikk [NW/ W]                                                                                                                   | [Gyldige=4689 /-] [Ugyldig=0 /-]                                                                                      |         |         |
| Tekst før spørsmål                                                                                                                   | Hvor enig eller uenig er du i følgende utsagn:                                                                        |         |         |
| Spørsmålstekst                                                                                                                       | Lærebøker i grunnskolen bør omskrives slik at de legger mer vekt på det nye kulturelle mangfoldet i Norge.            |         |         |
| Instruksjoner til intervjueren                                                                                                       | [Spurt hvis u=2 og ran6=4. ]                                                                                          |         |         |
| Kommentarer                                                                                                                          | Hvor enig eller uenig er du i følgende utsagn: Lærebøker i grunnskolen bør omskrives slik at de legger mer vekt på d  |         |         |
| Verdi                                                                                                                                | Merkelapp                                                                                                             | Enheter | Prosent |
| 1                                                                                                                                    | Svært enig                                                                                                            | 5       | 0.1%    |
| 2                                                                                                                                    | Enig                                                                                                                  | 41      | 0.9%    |
| 3                                                                                                                                    | Noe enig                                                                                                              | 53      | 1.1%    |
| 4                                                                                                                                    | Verken enig eller uenig                                                                                               | 36      | 0.8%    |
| 5                                                                                                                                    | Noe uenig                                                                                                             | 17      | 0.4%    |
| 6                                                                                                                                    | Uenig                                                                                                                 | 27      | 0.6%    |
| 7                                                                                                                                    | Svært uenig                                                                                                           | 15      | 0.3%    |
| 97                                                                                                                                   | Ikke svart                                                                                                            | 1       | 0.0%    |
| 98                                                                                                                                   | Ikke spurt                                                                                                            | 4494    | 95.8%   |
| Advarsel: disse tallene indikerer antall enheter (cases) i datafilen. De kan ikke tolkes som oppsummert statistikk for populasjonen. |                                                                                                                       |         |         |
| # r7mi5_5: Enig/uenig: Lærebøker i grunnskolen bør omskrives slik at de reflekterer det nye kulturelle mangfoldet                    |                                                                                                                       |         |         |
| Informasjon                                                                                                                          | [Type= diskret] [Format=numeric] [Rekkevidde= 1-7] [Missing=*]                                                        |         |         |
| Statistikk [NW/ W]                                                                                                                   | [Gyldige=4689 /-] [Ugyldig=0 /-]                                                                                      |         |         |
| Tekst før spørsmål                                                                                                                   | Hvor enig eller uenig er du i følgende utsagn:                                                                        |         |         |
| Spørsmålstekst                                                                                                                       | Lærebøker i grunnskolen bør omskrives slik at de reflekterer det nye kulturelle mangfoldet i Norge.                   |         |         |
| Instruksjoner til intervjueren                                                                                                       | [Spurt hvis u=2 og ran6=5. ]                                                                                          |         |         |
| Kommentarer                                                                                                                          | Hvor enig eller uenig er du i følgende utsagn: Lærebøker i grunnskolen bør omskrives slik at de reflekterer det nye k |         |         |
| Verdi                                                                                                                                | Merkelapp                                                                                                             | Enheter | Prosent |
| 1                                                                                                                                    | Svært enig                                                                                                            | 17      | 0.4%    |
| 2                                                                                                                                    | Enig                                                                                                                  | 32      | 0.7%    |
| 3                                                                                                                                    | Noe enig                                                                                                              | 49      | 1.0%    |
| 4                                                                                                                                    | Verken enig eller uenig                                                                                               | 27      | 0.6%    |
| 5                                                                                                                                    | Noe uenig                                                                                                             | 27      | 0.6%    |
| 6                                                                                                                                    | Uenig                                                                                                                 | 22      | 0.5%    |
| 7                                                                                                                                    | Svært uenig                                                                                                           | 10      | 0.2%    |
| 97                                                                                                                                   | Ikke svart                                                                                                            | 1       | 0.0%    |
| 98                                                                                                                                   | Ikke spurt                                                                                                            | 4504    | 96.1%   |
| Advarsel: disse tallene indikerer antall enheter (cases) i datafilen. De kan ikke tolkes som oppsummert statistikk for populasjonen. |                                                                                                                       |         |         |

| # r7mi5_6: Enig/uenig: Lærebøker i grunnskolen bør omskrives, mindre vekt på nye ideer om det kulturelle mangfoldet                  |                                                                                                                                     |         |         |
|--------------------------------------------------------------------------------------------------------------------------------------|-------------------------------------------------------------------------------------------------------------------------------------|---------|---------|
| Informasjon                                                                                                                          | [Type= diskret] [Format=numeric] [Rekkevidde= 1-7] [Missing=*]                                                                      |         |         |
| Statistikk [NW/ W]                                                                                                                   | [Gyldige=4689 /-] [Ugyldig=0 /-]                                                                                                    |         |         |
| Tekst før spørsmål                                                                                                                   | Hvor enig eller uenig er du i følgende utsagn:                                                                                      |         |         |
| Spørsmålstekst                                                                                                                       | Lærebøker i grunnskolen bør omskrives slik at de legger mindre vekt på nye ideer om kulturelt mangfold i Norge.                     |         |         |
| Instruksjoner til intervjueren                                                                                                       | [Spurt hvis u=2 og ran6=6. ]                                                                                                        |         |         |
| Kommentarer                                                                                                                          | Hvor enig eller uenig er du i følgende utsagn: Lærebøker i grunnskolen bør omskrives slik at de legger mindre vekt p                |         |         |
| Verdi                                                                                                                                | Merkelapp                                                                                                                           | Enheter | Prosent |
| 1                                                                                                                                    | Svært enig                                                                                                                          | 0       |         |
| 2                                                                                                                                    | Enig                                                                                                                                | 13      | 0.3%    |
| 3                                                                                                                                    | Noe enig                                                                                                                            | 25      | 0.5%    |
| 4                                                                                                                                    | Verken enig eller uenig                                                                                                             | 75      | 1.6%    |
| 5                                                                                                                                    | Noe uenig                                                                                                                           | 18      | 0.4%    |
| 6                                                                                                                                    | Uenig                                                                                                                               | 37      | 0.8%    |
| 7                                                                                                                                    | Svært uenig                                                                                                                         | 20      | 0.4%    |
| 97                                                                                                                                   | Ikke svart                                                                                                                          | 3       | 0.1%    |
| 98                                                                                                                                   | Ikke spurt                                                                                                                          | 4498    | 95.9%   |
| Advarsel: disse tallene indikerer antall enheter (cases) i datafilen. De kan ikke tolkes som oppsummert statistikk for populasjonen. |                                                                                                                                     |         |         |
| # r7dvby1: Hvor trygt/utrygt oppleves ditt nærmiljø?                                                                                 |                                                                                                                                     |         |         |
| Informasjon                                                                                                                          | [Type= diskret] [Format=numeric] [Rekkevidde= 1-7] [Missing=*]                                                                      |         |         |
| Statistikk [NW/ W]                                                                                                                   | [Gyldige=4689 /-] [Ugyldig=0 /-]                                                                                                    |         |         |
| Tekst før spørsmål                                                                                                                   | Vi ønsker nå å få vite noe om dine synspunkter på samfunnet generelt og det nye mangfoldet i Norge.<br><br>Tenk på ditt nærmiljø    |         |         |
| Spørsmålstekst                                                                                                                       | Hvor trygt eller utrygt opplever du at det er?                                                                                      |         |         |
| Instruksjoner til intervjueren                                                                                                       | [Spurt hvis u=3 eller u=4. ]                                                                                                        |         |         |
| Kommentarer                                                                                                                          | Vi ønsker nå å få vite noe om dine synspunkter på samfunnet generelt og det nye mangfoldet i Norge. Tenk på ditt                    |         |         |
| Verdi                                                                                                                                | Merkelapp                                                                                                                           | Enheter | Prosent |
| 1                                                                                                                                    | Svært trygt                                                                                                                         | 829     | 17.7%   |
| 2                                                                                                                                    | Trygt                                                                                                                               | 1133    | 24.2%   |
| 3                                                                                                                                    | Noe trygt                                                                                                                           | 158     | 3.4%    |
| 4                                                                                                                                    | Verken trygt eller utrygt                                                                                                           | 54      | 1.2%    |
| 5                                                                                                                                    | Noe utrygt                                                                                                                          | 71      | 1.5%    |
| 6                                                                                                                                    | Utrygt                                                                                                                              | 18      | 0.4%    |
| 7                                                                                                                                    | Svært utrygt                                                                                                                        | 4       | 0.1%    |
| 97                                                                                                                                   | Ikke svart                                                                                                                          | 39      | 0.8%    |
| 98                                                                                                                                   | Ikke spurt                                                                                                                          | 2383    | 50.8%   |
| Advarsel: disse tallene indikerer antall enheter (cases) i datafilen. De kan ikke tolkes som oppsummert statistikk for populasjonen. |                                                                                                                                     |         |         |
| # r7dvby2: Er nærmiljøet blitt tryggere/mer utrygt/ingen endring de siste årene?                                                     |                                                                                                                                     |         |         |
| Informasjon                                                                                                                          | [Type= diskret] [Format=numeric] [Rekkevidde= 1-3] [Missing=*]                                                                      |         |         |
| Statistikk [NW/ W]                                                                                                                   | [Gyldige=4689 /-] [Ugyldig=0 /-]                                                                                                    |         |         |
| Spørsmålstekst                                                                                                                       | Vil du si at nærmiljøet ditt i de siste par årene har blitt tryggere, mer utrygt eller har det ikke vært noen endring i tryggheten? |         |         |

| # r7dvby2: Er nærmiljøet blitt tryggere/mer utrygt/ingen endring de siste årene?                                                     |                                                                                                                       |         |                              |
|--------------------------------------------------------------------------------------------------------------------------------------|-----------------------------------------------------------------------------------------------------------------------|---------|------------------------------|
| Instruksjoner til intervjueren                                                                                                       | [Spurt hvis u=3 eller u=4. ]                                                                                          |         |                              |
| Kommentarer                                                                                                                          | Vil du si at nærmiljøet ditt i de siste par årene har blitt tryggere, mer utrygt eller har det ikke vært noen endring |         |                              |
| Verdi                                                                                                                                | Merkelapp                                                                                                             | Enheter | Prosent                      |
| 1                                                                                                                                    | Tryggere                                                                                                              | 98      | <div><div></div></div> 2.1%  |
| 2                                                                                                                                    | Mer utrygt                                                                                                            | 476     | <div><div></div></div> 10.2% |
| 3                                                                                                                                    | Ingen endring i trygghet                                                                                              | 1692    | <div><div></div></div> 36.1% |
| 97                                                                                                                                   | Ikke svart                                                                                                            | 40      | <div><div></div></div> 0.9%  |
| 98                                                                                                                                   | Ikke spurt                                                                                                            | 2383    | <div><div></div></div> 50.8% |
| Advarsel: disse tallene indikerer antall enheter (cases) i datafilen. De kan ikke tolkes som oppsummert statistikk for populasjonen. |                                                                                                                       |         |                              |
| # r7dv5: Fordel/ulempe for Norge at innvandrere kommer for å bosette seg?                                                            |                                                                                                                       |         |                              |
| Informasjon                                                                                                                          | [Type= diskret] [Format=numeric] [Rekkevidde= 1-7] [Missing=*]                                                        |         |                              |
| Statistikk [NW/ W]                                                                                                                   | [Gyldige=4689 /-] [Ugyldig=0 /-]                                                                                      |         |                              |
| Spørsmålstekst                                                                                                                       | Hvor stor fordel eller ulempe vil du si at det er for Norge at innvandrere kommer for å bosette seg her?              |         |                              |
| Instruksjoner til intervjueren                                                                                                       | [Spurt hvis u=4. ]                                                                                                    |         |                              |
| Kommentarer                                                                                                                          | Hvor stor fordel eller ulempe vil du si at det er for Norge at innvandrere kommer for å bosette seg her?              |         |                              |
| Verdi                                                                                                                                | Merkelapp                                                                                                             | Enheter | Prosent                      |
| 1                                                                                                                                    | Svært stor fordel                                                                                                     | 26      | <div><div></div></div> 0.6%  |
| 2                                                                                                                                    | Stor fordel                                                                                                           | 175     | <div><div></div></div> 3.7%  |
| 3                                                                                                                                    | En viss fordel                                                                                                        | 419     | <div><div></div></div> 8.9%  |
| 4                                                                                                                                    | Verken en fordel eller ulempe                                                                                         | 189     | <div><div></div></div> 4.0%  |
| 5                                                                                                                                    | En viss ulempe                                                                                                        | 241     | <div><div></div></div> 5.1%  |
| 6                                                                                                                                    | Stor ulempe                                                                                                           | 92      | <div><div></div></div> 2.0%  |
| 7                                                                                                                                    | Svært stor ulempe                                                                                                     | 44      | <div><div></div></div> 0.9%  |
| 97                                                                                                                                   | Ikke svart                                                                                                            | 17      | <div><div></div></div> 0.4%  |
| 98                                                                                                                                   | Ikke spurt                                                                                                            | 3486    | <div><div></div></div> 74.3% |
| Advarsel: disse tallene indikerer antall enheter (cases) i datafilen. De kan ikke tolkes som oppsummert statistikk for populasjonen. |                                                                                                                       |         |                              |
| # r7dv6: Hvor viktig er innvandringspolitikk for deg?                                                                                |                                                                                                                       |         |                              |
| Informasjon                                                                                                                          | [Type= diskret] [Format=numeric] [Rekkevidde= 1-5] [Missing=*]                                                        |         |                              |
| Statistikk [NW/ W]                                                                                                                   | [Gyldige=4689 /-] [Ugyldig=0 /-]                                                                                      |         |                              |
| Spørsmålstekst                                                                                                                       | Hvor viktig er innvandringspolitikk for deg personlig?                                                                |         |                              |
| Instruksjoner til intervjueren                                                                                                       | [Spurt hvis u=4. ]                                                                                                    |         |                              |
| Verdi                                                                                                                                | Merkelapp                                                                                                             | Enheter | Prosent                      |
| 1                                                                                                                                    | Svært viktig                                                                                                          | 152     | <div><div></div></div> 3.2%  |
| 2                                                                                                                                    | Viktig                                                                                                                | 466     | <div><div></div></div> 9.9%  |
| 3                                                                                                                                    | Noe viktig                                                                                                            | 440     | <div><div></div></div> 9.4%  |
| 4                                                                                                                                    | Lite viktig                                                                                                           | 113     | <div><div></div></div> 2.4%  |
| 5                                                                                                                                    | Ikke viktig i det hele tatt                                                                                           | 15      | <div><div></div></div> 0.3%  |
| 97                                                                                                                                   | Ikke svart                                                                                                            | 17      | <div><div></div></div> 0.4%  |
| 98                                                                                                                                   | Ikke spurt                                                                                                            | 3486    | <div><div></div></div> 74.3% |
| Advarsel: disse tallene indikerer antall enheter (cases) i datafilen. De kan ikke tolkes som oppsummert statistikk for populasjonen. |                                                                                                                       |         |                              |

| # r7dv7: Parti med best innvandringspolitikk                                                                                         |                                                                 |         |                               |
|--------------------------------------------------------------------------------------------------------------------------------------|-----------------------------------------------------------------|---------|-------------------------------|
| Informasjon                                                                                                                          | [Type= diskret] [Format=numeric] [Rekkevidde= 1-11] [Missing=*] |         |                               |
| Statistikk [NW/ W]                                                                                                                   | [Gyldige=4689 /-] [Ugyldig=0 /-]                                |         |                               |
| Spørsmålstekst                                                                                                                       | Hvilket parti synes du har den beste innvandringspolitikken?    |         |                               |
| Instruksjoner til intervjueren                                                                                                       | [Spurt hvis u=4. ]                                              |         |                               |
| Verdi                                                                                                                                | Merkelapp                                                       | Enheter | Prosent                       |
| 1                                                                                                                                    | Arbeiderpartiet                                                 | 210     | <div><div></div></div> 4.5%   |
| 2                                                                                                                                    | Fremskrittspartiet                                              | 306     | <div><div></div></div> 6.5%   |
| 3                                                                                                                                    | Høyre                                                           | 158     | <div><div></div></div> 3.4%   |
| 4                                                                                                                                    | Sosialistisk Venstreparti                                       | 92      | <div><div></div></div> 2.0%   |
| 5                                                                                                                                    | Senterpartiet                                                   | 29      | <div><div></div></div> 0.6%   |
| 6                                                                                                                                    | Kristelig Folkeparti                                            | 68      | <div><div></div></div> 1.5%   |
| 7                                                                                                                                    | Venstre                                                         | 59      | <div><div></div></div> 1.3%   |
| 8                                                                                                                                    | Rødt                                                            | 21      | <div><div></div></div> 0.4%   |
| 9                                                                                                                                    | Miljøpartiet De Grønne                                          | 6       | <div><div></div></div> 0.1%   |
| 10                                                                                                                                   | Andre                                                           | 14      | <div><div></div></div> 0.3%   |
| 11                                                                                                                                   | Ingen                                                           | 195     | <div><div></div></div> 4.2%   |
| 97                                                                                                                                   | Ikke svart                                                      | 45      | <div><div></div></div> 1.0%   |
| 98                                                                                                                                   | Ikke spurt                                                      | 3486    | <div><div></div></div> 74.3%  |
| Advarsel: disse tallene indikerer antall enheter (cases) i datafilen. De kan ikke tolkes som oppsummert statistikk for populasjonen. |                                                                 |         |                               |
| # r7dv7_10_other: Parti med best innvandringspolitikk, andre [anonymisert]                                                           |                                                                 |         |                               |
| Informasjon                                                                                                                          | [Type= diskret] [Format=character] [Missing=*]                  |         |                               |
| Statistikk [NW/ W]                                                                                                                   | [Gyldige=4689 /-] [Ugyldig=0 /-]                                |         |                               |
| Spørsmålstekst                                                                                                                       | Hvilket parti synes du har den beste innvandringspolitikken?    |         |                               |
| Instruksjoner til intervjueren                                                                                                       | [Spurt hvis u=4. ]                                              |         |                               |
|                                                                                                                                      | [Data tilbakeholdt av hensyn til anonymitet]                    |         |                               |
| Verdi                                                                                                                                | Merkelapp                                                       | Enheter | Prosent                       |
|                                                                                                                                      |                                                                 | 4689    | <div><div></div></div> 100.0% |
| Advarsel: disse tallene indikerer antall enheter (cases) i datafilen. De kan ikke tolkes som oppsummert statistikk for populasjonen. |                                                                 |         |                               |
| # r7ran7: [Randomiserer hvis u=4. ]                                                                                                  |                                                                 |         |                               |
| Informasjon                                                                                                                          | [Type= diskret] [Format=numeric] [Rekkevidde= 1-6] [Missing=*]  |         |                               |
| Statistikk [NW/ W]                                                                                                                   | [Gyldige=1192 /-] [Ugyldig=3497 /-]                             |         |                               |
| Instruksjoner til intervjueren                                                                                                       | [Randomiserer hvis u=4. ]                                       |         |                               |
| Verdi                                                                                                                                | Merkelapp                                                       | Enheter | Prosent                       |
| 1                                                                                                                                    | 1                                                               | 196     | <div><div></div></div> 16.4%  |
| 2                                                                                                                                    | 2                                                               | 208     | <div><div></div></div> 17.4%  |
| 3                                                                                                                                    | 3                                                               | 199     | <div><div></div></div> 16.7%  |
| 4                                                                                                                                    | 4                                                               | 186     | <div><div></div></div> 15.6%  |
| 5                                                                                                                                    | 5                                                               | 198     | <div><div></div></div> 16.6%  |
| 6                                                                                                                                    | 6                                                               | 205     | <div><div></div></div> 17.2%  |
| Sysmiss                                                                                                                              |                                                                 | 3497    |                               |
| Advarsel: disse tallene indikerer antall enheter (cases) i datafilen. De kan ikke tolkes som oppsummert statistikk for populasjonen. |                                                                 |         |                               |



| # r7dvex1_1: Bør parti få forbud mot å stille til valg: Du er dypt uenig i alle saker                                                |                                                                                                                                         |         |         |
|--------------------------------------------------------------------------------------------------------------------------------------|-----------------------------------------------------------------------------------------------------------------------------------------|---------|---------|
| Informasjon                                                                                                                          | [Type= diskret] [Format=numeric] [Rekkevidde= 1-2] [Missing=*]                                                                          |         |         |
| Statistikk [NW/ W]                                                                                                                   | [Gyldige=4689 /-] [Ugyldig=0 /-]                                                                                                        |         |         |
| Tekst før spørsmål                                                                                                                   | Forestill deg at et politisk parti som du er dypt uenig med i alle saker ønsker å stille til Stortingsvalg i Norge til høsten.          |         |         |
| Spørsmålstekst                                                                                                                       | Synes du at et slikt parti bør få forbud mot å stille til valg?                                                                         |         |         |
| Instruksjoner til intervjueren                                                                                                       | [Spurt hvis u=4 og ran7=1. ]                                                                                                            |         |         |
| Kommentarer                                                                                                                          | Forestill deg at et politisk parti som du er dypt uenig med i alle saker ønsker å stille til Stortingsvalg i Norge til                  |         |         |
| Verdi                                                                                                                                | Merkelapp                                                                                                                               | Enheter | Prosent |
| 1                                                                                                                                    | Ja                                                                                                                                      | 27      | 0.6%    |
| 2                                                                                                                                    | Nei                                                                                                                                     | 167     | 3.6%    |
| 97                                                                                                                                   | Ikke svart                                                                                                                              | 2       | 0.0%    |
| 98                                                                                                                                   | Ikke spurt                                                                                                                              | 4493    | 95.8%   |
| Advarsel: disse tallene indikerer antall enheter (cases) i datafilen. De kan ikke tolkes som oppsummert statistikk for populasjonen. |                                                                                                                                         |         |         |
| # r7dvex1_2: Bør parti få forbud mot å stille til valg: Fremmer udemokratiske verdier                                                |                                                                                                                                         |         |         |
| Informasjon                                                                                                                          | [Type= diskret] [Format=numeric] [Rekkevidde= 1-2] [Missing=*]                                                                          |         |         |
| Statistikk [NW/ W]                                                                                                                   | [Gyldige=4689 /-] [Ugyldig=0 /-]                                                                                                        |         |         |
| Tekst før spørsmål                                                                                                                   | Forestill deg at et politisk parti som fremmer udemokratiske verdier ønsker å stille til Stortingsvalg i Norge til høsten.              |         |         |
| Spørsmålstekst                                                                                                                       | Synes du at et slikt parti bør få forbud mot å stille til valg?                                                                         |         |         |
| Instruksjoner til intervjueren                                                                                                       | [Spurt hvis u=4 og ran7=2. ]                                                                                                            |         |         |
| Kommentarer                                                                                                                          | Forestill deg at et politisk parti som fremmer udemokratiske verdier ønsker å stille til Stortingsvalg i Norge til høst                 |         |         |
| Verdi                                                                                                                                | Merkelapp                                                                                                                               | Enheter | Prosent |
| 1                                                                                                                                    | Ja                                                                                                                                      | 94      | 2.0%    |
| 2                                                                                                                                    | Nei                                                                                                                                     | 105     | 2.2%    |
| 97                                                                                                                                   | Ikke svart                                                                                                                              | 9       | 0.2%    |
| 98                                                                                                                                   | Ikke spurt                                                                                                                              | 4481    | 95.6%   |
| Advarsel: disse tallene indikerer antall enheter (cases) i datafilen. De kan ikke tolkes som oppsummert statistikk for populasjonen. |                                                                                                                                         |         |         |
| # r7dvex1_3: Bør parti få forbud mot å stille til valg: Respekterer ikke demokratiske spilleregler                                   |                                                                                                                                         |         |         |
| Informasjon                                                                                                                          | [Type= diskret] [Format=numeric] [Rekkevidde= 1-2] [Missing=*]                                                                          |         |         |
| Statistikk [NW/ W]                                                                                                                   | [Gyldige=4689 /-] [Ugyldig=0 /-]                                                                                                        |         |         |
| Tekst før spørsmål                                                                                                                   | Forestill deg at et politisk parti som ikke respekterer demokratiske spilleregler ønsker å stille til Stortingsvalg i Norge til høsten. |         |         |
| Spørsmålstekst                                                                                                                       | Synes du at et slikt parti bør få forbud mot å stille til valg?                                                                         |         |         |
| Instruksjoner til intervjueren                                                                                                       | [Spurt hvis u=4 og ran7=3. ]                                                                                                            |         |         |
| Kommentarer                                                                                                                          | Forestill deg at et politisk parti som ikke respekterer demokratiske spilleregler ønsker å stille til Stortingsvalg i                   |         |         |
| Verdi                                                                                                                                | Merkelapp                                                                                                                               | Enheter | Prosent |
| 1                                                                                                                                    | Ja                                                                                                                                      | 95      | 2.0%    |
| 2                                                                                                                                    | Nei                                                                                                                                     | 99      | 2.1%    |
| 97                                                                                                                                   | Ikke svart                                                                                                                              | 5       | 0.1%    |
| 98                                                                                                                                   | Ikke spurt                                                                                                                              | 4490    | 95.8%   |
| Advarsel: disse tallene indikerer antall enheter (cases) i datafilen. De kan ikke tolkes som oppsummert statistikk for populasjonen. |                                                                                                                                         |         |         |

| # r7dvex1_4: Bør parti få forbud mot å stille til valg: Respekterer ikke norsk lov                                                   |                                                                                                                                  |         |                              |
|--------------------------------------------------------------------------------------------------------------------------------------|----------------------------------------------------------------------------------------------------------------------------------|---------|------------------------------|
| Informasjon                                                                                                                          | [Type= diskret] [Format=numeric] [Rekkevidde= 1-2] [Missing=*]                                                                   |         |                              |
| Statistikk [NW/ W]                                                                                                                   | [Gyldige=4689 /-] [Ugyldig=0 /-]                                                                                                 |         |                              |
| Tekst før spørsmål                                                                                                                   | Forestill deg at et politisk parti som ikke respekterer norsk lov ønsker å stille til Stortingsvalg i Norge til høsten.          |         |                              |
| Spørsmålstekst                                                                                                                       | Synes du at et slikt parti bør få forbud mot å stille til valg?                                                                  |         |                              |
| Instruksjoner til intervjueren                                                                                                       | [Spurt hvis u=4 og ran7=4. ]                                                                                                     |         |                              |
| Kommentarer                                                                                                                          | Forestill deg at et politisk parti som ikke respekterer norsk lov ønsker å stille til Stortingsvalg i Norge til høsten           |         |                              |
| Verdi                                                                                                                                | Merkelapp                                                                                                                        | Enheter | Prosent                      |
| 1                                                                                                                                    | Ja                                                                                                                               | 119     | <div><div></div></div> 2.5%  |
| 2                                                                                                                                    | Nei                                                                                                                              | 65      | <div><div></div></div> 1.4%  |
| 97                                                                                                                                   | Ikke svart                                                                                                                       | 2       | <div><div></div></div> 0.0%  |
| 98                                                                                                                                   | Ikke spurt                                                                                                                       | 4503    | <div><div></div></div> 96.0% |
| Advarsel: disse tallene indikerer antall enheter (cases) i datafilen. De kan ikke tolkes som oppsummert statistikk for populasjonen. |                                                                                                                                  |         |                              |
| # r7dvex1_5: Bør parti få forbud mot å stille til valg: Brukt vold for å oppnå mål                                                   |                                                                                                                                  |         |                              |
| Informasjon                                                                                                                          | [Type= diskret] [Format=numeric] [Rekkevidde= 1-2] [Missing=*]                                                                   |         |                              |
| Statistikk [NW/ W]                                                                                                                   | [Gyldige=4689 /-] [Ugyldig=0 /-]                                                                                                 |         |                              |
| Tekst før spørsmål                                                                                                                   | Forestill deg at et politisk parti som har brukt vold for å oppnå sine mål ønsker å stille til Stortingsvalg i Norge til høsten. |         |                              |
| Spørsmålstekst                                                                                                                       | Synes du at et slikt parti bør få forbud mot å stille til valg?                                                                  |         |                              |
| Instruksjoner til intervjueren                                                                                                       | [Spurt hvis u=4 og ran7=5. ]                                                                                                     |         |                              |
| Kommentarer                                                                                                                          | Forestill deg at et politisk parti som har brukt vold for å oppnå sine mål ønsker å stille til Stortingsvalg i Norge             |         |                              |
| Verdi                                                                                                                                | Merkelapp                                                                                                                        | Enheter | Prosent                      |
| 1                                                                                                                                    | Ja                                                                                                                               | 134     | <div><div></div></div> 2.9%  |
| 2                                                                                                                                    | Nei                                                                                                                              | 61      | <div><div></div></div> 1.3%  |
| 97                                                                                                                                   | Ikke svart                                                                                                                       | 3       | <div><div></div></div> 0.1%  |
| 98                                                                                                                                   | Ikke spurt                                                                                                                       | 4491    | <div><div></div></div> 95.8% |
| Advarsel: disse tallene indikerer antall enheter (cases) i datafilen. De kan ikke tolkes som oppsummert statistikk for populasjonen. |                                                                                                                                  |         |                              |
| # r7dvex1_6: Bør parti få forbud mot å stille til valg: Ansvarlig for terrorangrep                                                   |                                                                                                                                  |         |                              |
| Informasjon                                                                                                                          | [Type= diskret] [Format=numeric] [Rekkevidde= 1-2] [Missing=*]                                                                   |         |                              |
| Statistikk [NW/ W]                                                                                                                   | [Gyldige=4689 /-] [Ugyldig=0 /-]                                                                                                 |         |                              |
| Tekst før spørsmål                                                                                                                   | Forestill deg at et politisk parti som er ansvarlig for et terrorangrep ønsker å stille til Stortingsvalg i Norge til høsten.    |         |                              |
| Spørsmålstekst                                                                                                                       | Synes du at et slikt parti bør få forbud mot å stille til valg?                                                                  |         |                              |
| Instruksjoner til intervjueren                                                                                                       | [Spurt hvis u=4 og ran7=6. ]                                                                                                     |         |                              |
| Kommentarer                                                                                                                          | Forestill deg at et politisk parti som er ansvarlig for et terrorangrep ønsker å stille til Stortingsvalg i Norge til h          |         |                              |
| Verdi                                                                                                                                | Merkelapp                                                                                                                        | Enheter | Prosent                      |
| 1                                                                                                                                    | Ja                                                                                                                               | 135     | <div><div></div></div> 2.9%  |
| 2                                                                                                                                    | Nei                                                                                                                              | 68      | <div><div></div></div> 1.5%  |
| 97                                                                                                                                   | Ikke svart                                                                                                                       | 2       | <div><div></div></div> 0.0%  |
| 98                                                                                                                                   | Ikke spurt                                                                                                                       | 4484    | <div><div></div></div> 95.6% |
| Advarsel: disse tallene indikerer antall enheter (cases) i datafilen. De kan ikke tolkes som oppsummert statistikk for populasjonen. |                                                                                                                                  |         |                              |
| # r7dvby5: Hvor ofte ser du noen du antar/vet er asylsøker en vanlig uke                                                             |                                                                                                                                  |         |                              |
| Informasjon                                                                                                                          | [Type= diskret] [Format=numeric] [Rekkevidde= 1-6] [Missing=*]                                                                   |         |                              |

| # r7dvby5: Hvor ofte ser du noen du antar/vet er asylsøker en vanlig uke                                                             |                                                                                                    |         |                              |
|--------------------------------------------------------------------------------------------------------------------------------------|----------------------------------------------------------------------------------------------------|---------|------------------------------|
| Statistikk [NW/ W]                                                                                                                   | [Gyldige=4689 /-] [Ugyldig=0 /-]                                                                   |         |                              |
| Spørsmålstekst                                                                                                                       | Hvor ofte ser du personer du antar eller vet er asylsøkere der du ferdes i løpet av en vanlig uke? |         |                              |
| Instruksjoner til intervjueren                                                                                                       | [Spurt hvis u=3 eller u=4. ]                                                                       |         |                              |
| Kommentarer                                                                                                                          | Hvor ofte ser du personer du antar eller vet er asylsøkere der du ferdes i løpet av en vanlig uke? |         |                              |
| Verdi                                                                                                                                | Merkelapp                                                                                          | Enheter | Prosent                      |
| 1                                                                                                                                    | Aldri                                                                                              | 181     | <div><div></div></div> 3.9%  |
| 2                                                                                                                                    | Én gang i uken                                                                                     | 436     | <div><div></div></div> 9.3%  |
| 3                                                                                                                                    | 2-3 ganger i uken                                                                                  | 523     | <div><div></div></div> 11.2% |
| 4                                                                                                                                    | 4-6 ganger i uken                                                                                  | 289     | <div><div></div></div> 6.2%  |
| 5                                                                                                                                    | Hver dag                                                                                           | 536     | <div><div></div></div> 11.4% |
| 6                                                                                                                                    | Flere ganger om dagen                                                                              | 278     | <div><div></div></div> 5.9%  |
| 97                                                                                                                                   | Ikke svart                                                                                         | 63      | <div><div></div></div> 1.3%  |
| 98                                                                                                                                   | Ikke spurt                                                                                         | 2383    | <div><div></div></div> 50.8% |
| Advarsel: disse tallene indikerer antall enheter (cases) i datafilen. De kan ikke tolkes som oppsummert statistikk for populasjonen. |                                                                                                    |         |                              |
| # r7dvby6: Mengde kontakt med asylsøkere                                                                                             |                                                                                                    |         |                              |
| Informasjon                                                                                                                          | [Type= diskret] [Format=numeric] [Rekkevidde= 1-7] [Missing=*]                                     |         |                              |
| Statistikk [NW/ W]                                                                                                                   | [Gyldige=4689 /-] [Ugyldig=0 /-]                                                                   |         |                              |
| Tekst før spørsmål                                                                                                                   | Vi er interessert i hvor mye kontakt du har hatt med asylsøkere.                                   |         |                              |
| Spørsmålstekst                                                                                                                       | Vil du si at du har hatt...                                                                        |         |                              |
| Instruksjoner til intervjueren                                                                                                       | [Spurt hvis u=3 eller u=4. ]                                                                       |         |                              |
| Kommentarer                                                                                                                          | Vi er interessert i hvor mye kontakt du har hatt med asylsøkere. Vil du si at du har hatt...       |         |                              |
| Verdi                                                                                                                                | Merkelapp                                                                                          | Enheter | Prosent                      |
| 1                                                                                                                                    | Ingen kontakt                                                                                      | 647     | <div><div></div></div> 13.8% |
| 2                                                                                                                                    | Svært lite kontakt                                                                                 | 785     | <div><div></div></div> 16.7% |
| 3                                                                                                                                    | Litt kontakt                                                                                       | 454     | <div><div></div></div> 9.7%  |
| 4                                                                                                                                    | En del kontakt                                                                                     | 200     | <div><div></div></div> 4.3%  |
| 5                                                                                                                                    | Ganske mye kontakt                                                                                 | 76      | <div><div></div></div> 1.6%  |
| 6                                                                                                                                    | Mye kontakt                                                                                        | 53      | <div><div></div></div> 1.1%  |
| 7                                                                                                                                    | Svært mye kontakt                                                                                  | 27      | <div><div></div></div> 0.6%  |
| 97                                                                                                                                   | Ikke svart                                                                                         | 64      | <div><div></div></div> 1.4%  |
| 98                                                                                                                                   | Ikke spurt                                                                                         | 2383    | <div><div></div></div> 50.8% |
| Advarsel: disse tallene indikerer antall enheter (cases) i datafilen. De kan ikke tolkes som oppsummert statistikk for populasjonen. |                                                                                                    |         |                              |
| # r7dvby7: Positiv/negativ opplevelse ved kontakt med asylsøkere                                                                     |                                                                                                    |         |                              |
| Informasjon                                                                                                                          | [Type= diskret] [Format=numeric] [Rekkevidde= 1-7] [Missing=*]                                     |         |                              |
| Statistikk [NW/ W]                                                                                                                   | [Gyldige=4689 /-] [Ugyldig=0 /-]                                                                   |         |                              |
| Spørsmålstekst                                                                                                                       | Samlet sett, i hvilken grad har du opplevd den kontakten du har hatt som negativ eller positiv?    |         |                              |
| Instruksjoner til intervjueren                                                                                                       | [Spurt hvis u=3 eller u=4, og if R7DVB Y6>1. ]                                                     |         |                              |
| Kommentarer                                                                                                                          | Samlet sett, i hvilken grad har du opplevd den kontakten du har hatt som negativ eller positiv?    |         |                              |
| Verdi                                                                                                                                | Merkelapp                                                                                          | Enheter | Prosent                      |
| 1                                                                                                                                    | Utelukkende negativ                                                                                | 12      | <div><div></div></div> 0.3%  |
| 2                                                                                                                                    | For det meste negativ                                                                              | 52      | <div><div></div></div> 1.1%  |

| # r7dvby7: Positiv/negativ opplevelse ved kontakt med asylsøkere                                                                     |                                                                                                                         |         |                              |
|--------------------------------------------------------------------------------------------------------------------------------------|-------------------------------------------------------------------------------------------------------------------------|---------|------------------------------|
| Verdi                                                                                                                                | Merkelapp                                                                                                               | Enheter | Prosent                      |
| 3                                                                                                                                    | Noe mer negativ enn positiv                                                                                             | 88      | <div><div></div></div> 1.9%  |
| 4                                                                                                                                    | Blandet negativ og positiv                                                                                              | 347     | <div><div></div></div> 7.4%  |
| 5                                                                                                                                    | Noe mer positiv enn negativ                                                                                             | 237     | <div><div></div></div> 5.1%  |
| 6                                                                                                                                    | For det meste positiv                                                                                                   | 622     | <div><div></div></div> 13.3% |
| 7                                                                                                                                    | Utelukkende positiv                                                                                                     | 204     | <div><div></div></div> 4.4%  |
| 97                                                                                                                                   | Ikke svart                                                                                                              | 453     | <div><div></div></div> 9.7%  |
| 98                                                                                                                                   | Ikke spurt                                                                                                              | 2674    | <div><div></div></div> 57.0% |
| Advarsel: disse tallene indikerer antall enheter (cases) i datafilen. De kan ikke tolkes som oppsummert statistikk for populasjonen. |                                                                                                                         |         |                              |
| # r7dvby8: Har asylmottak i nærmiljø                                                                                                 |                                                                                                                         |         |                              |
| Informasjon                                                                                                                          | [Type= diskret] [Format=numeric] [Rekkevidde= 1-3] [Missing=*]                                                          |         |                              |
| Statistikk [NW/ W]                                                                                                                   | [Gyldige=4689 /-] [Ugyldig=0 /-]                                                                                        |         |                              |
| Tekst før spørsmål                                                                                                                   | Det har den siste tiden blitt både opprettet og lagt ned flere asylmottak i Norge.                                      |         |                              |
| Spørsmålstekst                                                                                                                       | Har du et asylmottak i ditt nærmiljø?                                                                                   |         |                              |
| Instruksjoner til intervjueren                                                                                                       | [Spurt hvis u=3 eller u=4. ]                                                                                            |         |                              |
| Kommentarer                                                                                                                          | Det har den siste tiden blitt både opprettet og lagt ned flere asylmottak i Norge. Har du et asylmottak i ditt nærmiljø |         |                              |
| Verdi                                                                                                                                | Merkelapp                                                                                                               | Enheter | Prosent                      |
| 1                                                                                                                                    | Ja                                                                                                                      | 698     | <div><div></div></div> 14.9% |
| 2                                                                                                                                    | Nei                                                                                                                     | 1164    | <div><div></div></div> 24.8% |
| 3                                                                                                                                    | Vet ikke                                                                                                                | 391     | <div><div></div></div> 8.3%  |
| 97                                                                                                                                   | Ikke svart                                                                                                              | 53      | <div><div></div></div> 1.1%  |
| 98                                                                                                                                   | Ikke spurt                                                                                                              | 2383    | <div><div></div></div> 50.8% |
| Advarsel: disse tallene indikerer antall enheter (cases) i datafilen. De kan ikke tolkes som oppsummert statistikk for populasjonen. |                                                                                                                         |         |                              |
| # r7dvby8aja: Når ble asylmottaket etablert?                                                                                         |                                                                                                                         |         |                              |
| Informasjon                                                                                                                          | [Type= diskret] [Format=numeric] [Rekkevidde= 1-9] [Missing=*]                                                          |         |                              |
| Statistikk [NW/ W]                                                                                                                   | [Gyldige=4689 /-] [Ugyldig=0 /-]                                                                                        |         |                              |
| Spørsmålstekst                                                                                                                       | Kan du anslå når asylmottaket ble etablert?                                                                             |         |                              |
| Instruksjoner til intervjueren                                                                                                       | [Spurt hvis u=3 og R7DVBY8=1. ]                                                                                         |         |                              |
| Verdi                                                                                                                                | Merkelapp                                                                                                               | Enheter | Prosent                      |
| 1                                                                                                                                    | Nettopp (siste halvdel av 2016)                                                                                         | 10      | <div><div></div></div> 0.2%  |
| 2                                                                                                                                    | Tidligere i år (første halvdel av 2016)                                                                                 | 36      | <div><div></div></div> 0.8%  |
| 3                                                                                                                                    | I fjor høst (siste halvdel av 2015)                                                                                     | 71      | <div><div></div></div> 1.5%  |
| 4                                                                                                                                    | I fjor vår (første halvdel av 2015)                                                                                     | 35      | <div><div></div></div> 0.7%  |
| 5                                                                                                                                    | 2 år siden (ca. 2014)                                                                                                   | 33      | <div><div></div></div> 0.7%  |
| 6                                                                                                                                    | 3 år siden (ca. 2013)                                                                                                   | 10      | <div><div></div></div> 0.2%  |
| 7                                                                                                                                    | 4 år siden (ca. 2012)                                                                                                   | 16      | <div><div></div></div> 0.3%  |
| 8                                                                                                                                    | 5 år siden (ca. 2011)                                                                                                   | 19      | <div><div></div></div> 0.4%  |
| 9                                                                                                                                    | For 6 år eller mer siden (ca. 2010 eller tidligere)                                                                     | 77      | <div><div></div></div> 1.6%  |
| 97                                                                                                                                   | Ikke svart                                                                                                              | 2       | <div><div></div></div> 0.0%  |
| 98                                                                                                                                   | Ikke spurt                                                                                                              | 4380    | <div><div></div></div> 93.4% |
| Advarsel: disse tallene indikerer antall enheter (cases) i datafilen. De kan ikke tolkes som oppsummert statistikk for populasjonen. |                                                                                                                         |         |                              |

| # r7dvby8bja: Avstand mellom mottak og der du bor                                                                                    |                                                                |         |         |
|--------------------------------------------------------------------------------------------------------------------------------------|----------------------------------------------------------------|---------|---------|
| Informasjon                                                                                                                          | [Type= diskret] [Format=numeric] [Rekkevidde= 1-7] [Missing=*] |         |         |
| Statistikk [NW/ W]                                                                                                                   | [Gyldige=4689 /-] [Ugyldig=0 /-]                               |         |         |
| Spørsmålstekst                                                                                                                       | Omtrent hvor langt er det til mottaket fra der du bor?         |         |         |
| Instruksjoner til intervjueren                                                                                                       | [Spurt hvis u=3 og R7DVBY8=1. ]                                |         |         |
| Verdi                                                                                                                                | Merkelapp                                                      | Enheter | Prosent |
| 1                                                                                                                                    | Mottaket er rett ved siden av                                  | 15      | 0.3%    |
| 2                                                                                                                                    | 1 km                                                           | 48      | 1.0%    |
| 3                                                                                                                                    | 2 km                                                           | 46      | 1.0%    |
| 4                                                                                                                                    | 3 km                                                           | 44      | 0.9%    |
| 5                                                                                                                                    | 4 km                                                           | 30      | 0.6%    |
| 6                                                                                                                                    | 5 km                                                           | 37      | 0.8%    |
| 7                                                                                                                                    | Mer enn 5 km                                                   | 89      | 1.9%    |
| 97                                                                                                                                   | Ikke svart                                                     | 0       |         |
| 98                                                                                                                                   | Ikke spurt                                                     | 4380    | 93.4%   |
| Advarsel: disse tallene indikerer antall enheter (cases) i datafilen. De kan ikke tolkes som oppsummert statistikk for populasjonen. |                                                                |         |         |
| # r7dvby8aneij: Har det vært et asylmottak i ditt nærmiljø før?                                                                      |                                                                |         |         |
| Informasjon                                                                                                                          | [Type= diskret] [Format=numeric] [Rekkevidde= 1-3] [Missing=*] |         |         |
| Statistikk [NW/ W]                                                                                                                   | [Gyldige=4689 /-] [Ugyldig=0 /-]                               |         |         |
| Spørsmålstekst                                                                                                                       | Har det vært et asylmottak i ditt nærmiljø før?                |         |         |
| Instruksjoner til intervjueren                                                                                                       | [Spurt hvis u=3 og R7DVBY8>1. ]                                |         |         |
| Verdi                                                                                                                                | Merkelapp                                                      | Enheter | Prosent |
| 1                                                                                                                                    | Ja                                                             | 133     | 2.8%    |
| 2                                                                                                                                    | Nei                                                            | 434     | 9.3%    |
| 3                                                                                                                                    | Vet ikke                                                       | 197     | 4.2%    |
| 97                                                                                                                                   | Ikke svart                                                     | 30      | 0.6%    |
| 98                                                                                                                                   | Ikke spurt                                                     | 3895    | 83.1%   |
| Advarsel: disse tallene indikerer antall enheter (cases) i datafilen. De kan ikke tolkes som oppsummert statistikk for populasjonen. |                                                                |         |         |
| # r7dvby8aneija1: Når ble asylmottaket lagt ned?                                                                                     |                                                                |         |         |
| Informasjon                                                                                                                          | [Type= diskret] [Format=numeric] [Rekkevidde= 1-9] [Missing=*] |         |         |
| Statistikk [NW/ W]                                                                                                                   | [Gyldige=4689 /-] [Ugyldig=0 /-]                               |         |         |
| Spørsmålstekst                                                                                                                       | Kan du anslå når asylmottaket ble lagt ned?                    |         |         |
| Instruksjoner til intervjueren                                                                                                       | [Spurt hvis u=3 og R7DVBY8aNEI=1. ]                            |         |         |
| Verdi                                                                                                                                | Merkelapp                                                      | Enheter | Prosent |
| 1                                                                                                                                    | Nettopp (siste halvdel av 2016)                                | 21      | 0.4%    |
| 2                                                                                                                                    | Tidligere i år (første halvdel av 2016)                        | 36      | 0.8%    |
| 3                                                                                                                                    | I fjor høst (siste halvdel av 2015)                            | 10      | 0.2%    |
| 4                                                                                                                                    | I fjor vår (første halvdel av 2015)                            | 6       | 0.1%    |
| 5                                                                                                                                    | 2 år siden (ca. 2014)                                          | 12      | 0.3%    |
| 6                                                                                                                                    | 3 år siden (ca. 2013)                                          | 7       | 0.1%    |
| 7                                                                                                                                    | 4 år siden (ca. 2012)                                          | 7       | 0.1%    |
| 8                                                                                                                                    | 5 år siden (ca. 2011)                                          | 5       | 0.1%    |

| # r7dvby8aneija1: Når ble asylmottaket lagt ned?                                                                                     |                                                                |         |         |
|--------------------------------------------------------------------------------------------------------------------------------------|----------------------------------------------------------------|---------|---------|
| Verdi                                                                                                                                | Merkelapp                                                      | Enheter | Prosent |
| 9                                                                                                                                    | For 6 år eller mer siden (ca. 2010 eller tidligere)            | 26      | 0.6%    |
| 97                                                                                                                                   | Ikke svart                                                     | 3       | 0.1%    |
| 98                                                                                                                                   | Ikke spurt                                                     | 4556    | 97.2%   |
| Advarsel: disse tallene indikerer antall enheter (cases) i datafilen. De kan ikke tolkes som oppsummert statistikk for populasjonen. |                                                                |         |         |
| # r7dvby8aneija2: Avstand mellom nedlagt mottak og der du bor                                                                        |                                                                |         |         |
| Informasjon                                                                                                                          | [Type= diskret] [Format=numeric] [Rekkevidde= 1-7] [Missing=*] |         |         |
| Statistikk [NW/ W]                                                                                                                   | [Gyldige=4689 /-] [Ugyldig=0 /-]                               |         |         |
| Spørsmålstekst                                                                                                                       | Omtrent hvor langt var det til mottaket fra der du bor?        |         |         |
| Instruksjoner til intervjueren                                                                                                       | [Spurt hvis u=3 og R7DVBY8aNEI=1. ]                            |         |         |
| Verdi                                                                                                                                | Merkelapp                                                      | Enheter | Prosent |
| 1                                                                                                                                    | Mottaket var rett ved siden av                                 | 10      | 0.2%    |
| 2                                                                                                                                    | 1 km                                                           | 26      | 0.6%    |
| 3                                                                                                                                    | 2 km                                                           | 22      | 0.5%    |
| 4                                                                                                                                    | 3 km                                                           | 20      | 0.4%    |
| 5                                                                                                                                    | 4 km                                                           | 14      | 0.3%    |
| 6                                                                                                                                    | 5 km                                                           | 13      | 0.3%    |
| 7                                                                                                                                    | Mer enn 5 km                                                   | 27      | 0.6%    |
| 97                                                                                                                                   | Ikke svart                                                     | 1       | 0.0%    |
| 98                                                                                                                                   | Ikke spurt                                                     | 4556    | 97.2%   |
| Advarsel: disse tallene indikerer antall enheter (cases) i datafilen. De kan ikke tolkes som oppsummert statistikk for populasjonen. |                                                                |         |         |
| # r7dvby8aja1: Stilling til å ha asylmottak i nærmiljø                                                                               |                                                                |         |         |
| Informasjon                                                                                                                          | [Type= diskret] [Format=numeric] [Rekkevidde= 1-3] [Missing=*] |         |         |
| Statistikk [NW/ W]                                                                                                                   | [Gyldige=4689 /-] [Ugyldig=0 /-]                               |         |         |
| Spørsmålstekst                                                                                                                       | Hvordan stiller du deg til å ha et asylmottak i ditt nærmiljø? |         |         |
| Instruksjoner til intervjueren                                                                                                       | [Spurt hvis u=3 eller u=4, og R7DVBY8=1. ]                     |         |         |
| Verdi                                                                                                                                | Merkelapp                                                      | Enheter | Prosent |
| 1                                                                                                                                    | Det er greit                                                   | 395     | 8.4%    |
| 2                                                                                                                                    | Det er ikke greit                                              | 140     | 3.0%    |
| 3                                                                                                                                    | Det spiller ingen rolle                                        | 159     | 3.4%    |
| 97                                                                                                                                   | Ikke svart                                                     | 4       | 0.1%    |
| 98                                                                                                                                   | Ikke spurt                                                     | 3991    | 85.1%   |
| Advarsel: disse tallene indikerer antall enheter (cases) i datafilen. De kan ikke tolkes som oppsummert statistikk for populasjonen. |                                                                |         |         |
| # r7dvby8ane1: Stilling til å få asylmottak i nærmiljø                                                                               |                                                                |         |         |
| Informasjon                                                                                                                          | [Type= diskret] [Format=numeric] [Rekkevidde= 1-3] [Missing=*] |         |         |
| Statistikk [NW/ W]                                                                                                                   | [Gyldige=4689 /-] [Ugyldig=0 /-]                               |         |         |
| Spørsmålstekst                                                                                                                       | Hvordan stiller du deg til å få et asylmottak i ditt nærmiljø? |         |         |
| Instruksjoner til intervjueren                                                                                                       | [Spurt hvis u=3 eller u=4, og if R7DVBY8>1. ]                  |         |         |
| Verdi                                                                                                                                | Merkelapp                                                      | Enheter | Prosent |
| 1                                                                                                                                    | Det er greit                                                   | 563     | 12.0%   |
| 2                                                                                                                                    | Det er ikke greit                                              | 484     | 10.3%   |

| # r7dvby8ane1: Stilling til å få asylmottak i nærmiljø                                                                               |                                                                                                                                        |         |                        |       |
|--------------------------------------------------------------------------------------------------------------------------------------|----------------------------------------------------------------------------------------------------------------------------------------|---------|------------------------|-------|
| Verdi                                                                                                                                | Merkelapp                                                                                                                              | Enheter | Prosent                |       |
| 3                                                                                                                                    | Det spiller ingen rolle                                                                                                                | 494     | <div><div></div></div> | 10.5% |
| 97                                                                                                                                   | Ikke svart                                                                                                                             | 67      | <div><div></div></div> | 1.4%  |
| 98                                                                                                                                   | Ikke spurt                                                                                                                             | 3081    | <div><div></div></div> | 65.7% |
| Advarsel: disse tallene indikerer antall enheter (cases) i datafilen. De kan ikke tolkes som oppsummert statistikk for populasjonen. |                                                                                                                                        |         |                        |       |
| # r7dvby9_1: Erfaring ved å få mange asylsøkere den siste tiden: Hilst på                                                            |                                                                                                                                        |         |                        |       |
| Informasjon                                                                                                                          | [Type= diskret] [Format=numeric] [Rekkevidde= 1-3] [Missing=*]                                                                         |         |                        |       |
| Statistikk [NW/ W]                                                                                                                   | [Gyldige=4689 /-] [Ugyldig=0 /-]                                                                                                       |         |                        |       |
| Tekst før spørsmål                                                                                                                   | Norge har fått mange asylsøkere den siste tiden. Folk har gjort seg ulike erfaringer med dette. Hva har dine erfaringer vært? Jeg har: |         |                        |       |
| Spørsmålstekst                                                                                                                       | Hilst på noen av asylsøkerne.                                                                                                          |         |                        |       |
| Instruksjoner til intervjueren                                                                                                       | [Spurt hvis u=3. ]                                                                                                                     |         |                        |       |
| Kommentarer                                                                                                                          | Hilst på noen av asylsøkerne. (Norge har fått mange asylsøkere den siste tiden. Folk har gjort seg ulike erfaringer m                  |         |                        |       |
| Verdi                                                                                                                                | Merkelapp                                                                                                                              | Enheter | Prosent                |       |
| 1                                                                                                                                    | Ja                                                                                                                                     | 400     | <div><div></div></div> | 8.5%  |
| 2                                                                                                                                    | Nei                                                                                                                                    | 472     | <div><div></div></div> | 10.1% |
| 3                                                                                                                                    | Ikke relevant                                                                                                                          | 171     | <div><div></div></div> | 3.6%  |
| 97                                                                                                                                   | Ikke svart                                                                                                                             | 60      | <div><div></div></div> | 1.3%  |
| 98                                                                                                                                   | Ikke spurt                                                                                                                             | 3586    | <div><div></div></div> | 76.5% |
| Advarsel: disse tallene indikerer antall enheter (cases) i datafilen. De kan ikke tolkes som oppsummert statistikk for populasjonen. |                                                                                                                                        |         |                        |       |
| # r7dvby9_2: Erfaring ved å få mange asylsøkere den siste tiden: Kontakt på internett                                                |                                                                                                                                        |         |                        |       |
| Informasjon                                                                                                                          | [Type= diskret] [Format=numeric] [Rekkevidde= 1-3] [Missing=*]                                                                         |         |                        |       |
| Statistikk [NW/ W]                                                                                                                   | [Gyldige=4689 /-] [Ugyldig=0 /-]                                                                                                       |         |                        |       |
| Tekst før spørsmål                                                                                                                   | Norge har fått mange asylsøkere den siste tiden. Folk har gjort seg ulike erfaringer med dette. Hva har dine erfaringer vært? Jeg har: |         |                        |       |
| Spørsmålstekst                                                                                                                       | Hatt kontakt på internett med asylsøkere (f.eks. på Facebook eller Finn).                                                              |         |                        |       |
| Instruksjoner til intervjueren                                                                                                       | [Spurt hvis u=3. ]                                                                                                                     |         |                        |       |
| Kommentarer                                                                                                                          | Hatt kontakt på internett med asylsøkere (f.eks. på Facebook eller Finn). (Norge har fått mange asylsøkere den siste                   |         |                        |       |
| Verdi                                                                                                                                | Merkelapp                                                                                                                              | Enheter | Prosent                |       |
| 1                                                                                                                                    | Ja                                                                                                                                     | 52      | <div><div></div></div> | 1.1%  |
| 2                                                                                                                                    | Nei                                                                                                                                    | 792     | <div><div></div></div> | 16.9% |
| 3                                                                                                                                    | Ikke relevant                                                                                                                          | 178     | <div><div></div></div> | 3.8%  |
| 97                                                                                                                                   | Ikke svart                                                                                                                             | 81      | <div><div></div></div> | 1.7%  |
| 98                                                                                                                                   | Ikke spurt                                                                                                                             | 3586    | <div><div></div></div> | 76.5% |
| Advarsel: disse tallene indikerer antall enheter (cases) i datafilen. De kan ikke tolkes som oppsummert statistikk for populasjonen. |                                                                                                                                        |         |                        |       |
| # r7dvby9_3: Erfaring ved å få mange asylsøkere den siste tiden: Blitt venn med noen                                                 |                                                                                                                                        |         |                        |       |
| Informasjon                                                                                                                          | [Type= diskret] [Format=numeric] [Rekkevidde= 1-3] [Missing=*]                                                                         |         |                        |       |
| Statistikk [NW/ W]                                                                                                                   | [Gyldige=4689 /-] [Ugyldig=0 /-]                                                                                                       |         |                        |       |
| Tekst før spørsmål                                                                                                                   | Norge har fått mange asylsøkere den siste tiden. Folk har gjort seg ulike erfaringer med dette. Hva har dine erfaringer vært? Jeg har: |         |                        |       |
| Spørsmålstekst                                                                                                                       | Blitt venn med noen av asylsøkerne.                                                                                                    |         |                        |       |
| Instruksjoner til intervjueren                                                                                                       | [Spurt hvis u=3. ]                                                                                                                     |         |                        |       |

| # r7dvby9_3: Erfaring ved å få mange asylsøkere den siste tiden: Blitt venn med noen                                                 |               |                                                                                                                                        |                              |
|--------------------------------------------------------------------------------------------------------------------------------------|---------------|----------------------------------------------------------------------------------------------------------------------------------------|------------------------------|
| Kommentarer                                                                                                                          |               | Blitt venn med noen av asylsøkerne. (Norge har fått mange asylsøkere den siste tiden. Folk har gjort seg ulike erfarin                 |                              |
| Verdi                                                                                                                                | Merkelapp     | Enheter                                                                                                                                | Prosent                      |
| 1                                                                                                                                    | Ja            | 80                                                                                                                                     | <div><div></div></div> 1.7%  |
| 2                                                                                                                                    | Nei           | 789                                                                                                                                    | <div><div></div></div> 16.8% |
| 3                                                                                                                                    | Ikke relevant | 158                                                                                                                                    | <div><div></div></div> 3.4%  |
| 97                                                                                                                                   | Ikke svart    | 76                                                                                                                                     | <div><div></div></div> 1.6%  |
| 98                                                                                                                                   | Ikke spurt    | 3586                                                                                                                                   | <div><div></div></div> 76.5% |
| Advarsel: disse tallene indikerer antall enheter (cases) i datafilen. De kan ikke tolkes som oppsummert statistikk for populasjonen. |               |                                                                                                                                        |                              |
| # r7dvby9_4: Erfaring ved å få mange asylsøkere den siste tiden: Fått hjelp av                                                       |               |                                                                                                                                        |                              |
| Informasjon                                                                                                                          |               | [Type= diskret] [Format=numeric] [Rekkevidde= 1-3] [Missing=*]                                                                         |                              |
| Statistikk [NW/ W]                                                                                                                   |               | [Gyldige=4689 /-] [Ugyldig=0 /-]                                                                                                       |                              |
| Tekst før spørsmål                                                                                                                   |               | Norge har fått mange asylsøkere den siste tiden. Folk har gjort seg ulike erfaringer med dette. Hva har dine erfaringer vært? Jeg har: |                              |
| Spørsmålstekst                                                                                                                       |               | Fått hjelp av en eller flere asylsøkere.                                                                                               |                              |
| Instruksjoner til intervjueren                                                                                                       |               | [Spurt hvis u=3. ]                                                                                                                     |                              |
| Kommentarer                                                                                                                          |               | Fått hjelp av en eller flere asylsøkere. (Norge har fått mange asylsøkere den siste tiden. Folk har gjort seg ulike e                  |                              |
| Verdi                                                                                                                                | Merkelapp     | Enheter                                                                                                                                | Prosent                      |
| 1                                                                                                                                    | Ja            | 43                                                                                                                                     | <div><div></div></div> 0.9%  |
| 2                                                                                                                                    | Nei           | 815                                                                                                                                    | <div><div></div></div> 17.4% |
| 3                                                                                                                                    | Ikke relevant | 163                                                                                                                                    | <div><div></div></div> 3.5%  |
| 97                                                                                                                                   | Ikke svart    | 82                                                                                                                                     | <div><div></div></div> 1.7%  |
| 98                                                                                                                                   | Ikke spurt    | 3586                                                                                                                                   | <div><div></div></div> 76.5% |
| Advarsel: disse tallene indikerer antall enheter (cases) i datafilen. De kan ikke tolkes som oppsummert statistikk for populasjonen. |               |                                                                                                                                        |                              |
| # r7dvby9_5: Erfaring ved å få mange asylsøkere den siste tiden: Blitt med i støttegruppe                                            |               |                                                                                                                                        |                              |
| Informasjon                                                                                                                          |               | [Type= diskret] [Format=numeric] [Rekkevidde= 1-3] [Missing=*]                                                                         |                              |
| Statistikk [NW/ W]                                                                                                                   |               | [Gyldige=4689 /-] [Ugyldig=0 /-]                                                                                                       |                              |
| Tekst før spørsmål                                                                                                                   |               | Norge har fått mange asylsøkere den siste tiden. Folk har gjort seg ulike erfaringer med dette. Hva har dine erfaringer vært? Jeg har: |                              |
| Spørsmålstekst                                                                                                                       |               | Blitt med i støttegruppe for asylsøkere (f.eks. på nett).                                                                              |                              |
| Instruksjoner til intervjueren                                                                                                       |               | [Spurt hvis u=3. ]                                                                                                                     |                              |
| Kommentarer                                                                                                                          |               | Blitt med i støttegruppe for asylsøkere (f.eks. på nett). (Norge har fått mange asylsøkere den siste tiden. Folk har                   |                              |
| Verdi                                                                                                                                | Merkelapp     | Enheter                                                                                                                                | Prosent                      |
| 1                                                                                                                                    | Ja            | 55                                                                                                                                     | <div><div></div></div> 1.2%  |
| 2                                                                                                                                    | Nei           | 833                                                                                                                                    | <div><div></div></div> 17.8% |
| 3                                                                                                                                    | Ikke relevant | 136                                                                                                                                    | <div><div></div></div> 2.9%  |
| 97                                                                                                                                   | Ikke svart    | 79                                                                                                                                     | <div><div></div></div> 1.7%  |
| 98                                                                                                                                   | Ikke spurt    | 3586                                                                                                                                   | <div><div></div></div> 76.5% |
| Advarsel: disse tallene indikerer antall enheter (cases) i datafilen. De kan ikke tolkes som oppsummert statistikk for populasjonen. |               |                                                                                                                                        |                              |
| # r7dvby9_6: Erfaring ved å få mange asylsøkere den siste tiden: Uttrykt skepsis                                                     |               |                                                                                                                                        |                              |
| Informasjon                                                                                                                          |               | [Type= diskret] [Format=numeric] [Rekkevidde= 1-3] [Missing=*]                                                                         |                              |
| Statistikk [NW/ W]                                                                                                                   |               | [Gyldige=4689 /-] [Ugyldig=0 /-]                                                                                                       |                              |
| Tekst før spørsmål                                                                                                                   |               | Norge har fått mange asylsøkere den siste tiden. Folk har gjort seg ulike erfaringer med dette. Hva har dine erfaringer vært?          |                              |



| # r7dvby9_6: Erfaring ved å få mange asylsøkere den siste tiden: Uttrykt skepsis                                                     |                                                                                                                                        |         |                               |
|--------------------------------------------------------------------------------------------------------------------------------------|----------------------------------------------------------------------------------------------------------------------------------------|---------|-------------------------------|
|                                                                                                                                      | Jeg har:                                                                                                                               |         |                               |
| Spørsmålstekst                                                                                                                       | Uttrykt skepsis overfor asylsøkerne til andre.                                                                                         |         |                               |
| Instruksjoner til intervjueren                                                                                                       | [Spurt hvis u=3. ]                                                                                                                     |         |                               |
| Kommentarer                                                                                                                          | Uttrykt skepsis overfor asylsøkerne til andre. (Norge har fått mange asylsøkere den siste tiden. Folk har gjort seg ul                 |         |                               |
| Verdi                                                                                                                                | Merkelapp                                                                                                                              | Enheter | Prosent                       |
| 1                                                                                                                                    | Ja                                                                                                                                     | 200     | <div><div></div></div> 4.3%   |
| 2                                                                                                                                    | Nei                                                                                                                                    | 711     | <div><div></div></div> 15.2%  |
| 3                                                                                                                                    | Ikke relevant                                                                                                                          | 114     | <div><div></div></div> 2.4%   |
| 97                                                                                                                                   | Ikke svart                                                                                                                             | 78      | <div><div></div></div> 1.7%   |
| 98                                                                                                                                   | Ikke spurt                                                                                                                             | 3586    | <div><div></div></div> 76.5%  |
| Advarsel: disse tallene indikerer antall enheter (cases) i datafilen. De kan ikke tolkes som oppsummert statistikk for populasjonen. |                                                                                                                                        |         |                               |
| # r7dvby9_7: Erfaring ved å få mange asylsøkere den siste tiden: Unngått så langt det lar seg gjøre                                  |                                                                                                                                        |         |                               |
| Informasjon                                                                                                                          | [Type= diskret] [Format=numeric] [Rekkevidde= 1-3] [Missing=*]                                                                         |         |                               |
| Statistikk [NW/ W]                                                                                                                   | [Gyldige=4689 /-] [Ugyldig=0 /-]                                                                                                       |         |                               |
| Tekst før spørsmål                                                                                                                   | Norge har fått mange asylsøkere den siste tiden. Folk har gjort seg ulike erfaringer med dette. Hva har dine erfaringer vært? Jeg har: |         |                               |
| Spørsmålstekst                                                                                                                       | Unngått asylsøkerne så langt det lar seg gjøre.                                                                                        |         |                               |
| Instruksjoner til intervjueren                                                                                                       | [Spurt hvis u=3. ]                                                                                                                     |         |                               |
| Kommentarer                                                                                                                          | Unngått asylsøkerne så langt det lar seg gjøre. (Norge har fått mange asylsøkere den siste tiden. Folk har gjort se                    |         |                               |
| Verdi                                                                                                                                | Merkelapp                                                                                                                              | Enheter | Prosent                       |
| 1                                                                                                                                    | Ja                                                                                                                                     | 70      | <div><div></div></div> 1.5%   |
| 2                                                                                                                                    | Nei                                                                                                                                    | 770     | <div><div></div></div> 16.4%  |
| 3                                                                                                                                    | Ikke relevant                                                                                                                          | 184     | <div><div></div></div> 3.9%   |
| 97                                                                                                                                   | Ikke svart                                                                                                                             | 79      | <div><div></div></div> 1.7%   |
| 98                                                                                                                                   | Ikke spurt                                                                                                                             | 3586    | <div><div></div></div> 76.5%  |
| Advarsel: disse tallene indikerer antall enheter (cases) i datafilen. De kan ikke tolkes som oppsummert statistikk for populasjonen. |                                                                                                                                        |         |                               |
| # r7dvby9_comment: Andre erfaringer [anonymisert]                                                                                    |                                                                                                                                        |         |                               |
| Informasjon                                                                                                                          | [Type= diskret] [Format=character] [Missing=*]                                                                                         |         |                               |
| Statistikk [NW/ W]                                                                                                                   | [Gyldige=4689 /-] [Ugyldig=0 /-]                                                                                                       |         |                               |
| Tekst før spørsmål                                                                                                                   | Jeg har andre erfaringer.                                                                                                              |         |                               |
| Spørsmålstekst                                                                                                                       | Vennligst skriv:                                                                                                                       |         |                               |
| Instruksjoner til intervjueren                                                                                                       | [Spurt hvis u=3. ]<br>[Data tilbakeholdt av hensyn til anonymitet]                                                                     |         |                               |
| Verdi                                                                                                                                | Merkelapp                                                                                                                              | Enheter | Prosent                       |
|                                                                                                                                      |                                                                                                                                        | 4689    | <div><div></div></div> 100.0% |
| Advarsel: disse tallene indikerer antall enheter (cases) i datafilen. De kan ikke tolkes som oppsummert statistikk for populasjonen. |                                                                                                                                        |         |                               |
| # r7dvby10_1: Følelse om asylsøkere som gruppe: Beundring                                                                            |                                                                                                                                        |         |                               |
| Informasjon                                                                                                                          | [Type= diskret] [Format=numeric] [Rekkevidde= 1-5] [Missing=*]                                                                         |         |                               |
| Statistikk [NW/ W]                                                                                                                   | [Gyldige=4689 /-] [Ugyldig=0 /-]                                                                                                       |         |                               |
| Tekst før spørsmål                                                                                                                   | Nå kommer noen spørsmål om hva du personlig føler om asylsøkere. I hvilken grad har du følgende følelser om asylsøkere som gruppe?     |         |                               |

| # r7dvby10_1: Følelse om asylsøkere som gruppe: Beundring                                                                            |                                                                                                                                    |         |                              |
|--------------------------------------------------------------------------------------------------------------------------------------|------------------------------------------------------------------------------------------------------------------------------------|---------|------------------------------|
| Spørsmålstekst                                                                                                                       | Beundring                                                                                                                          |         |                              |
| Instruksjoner til intervjueren                                                                                                       | [Spurt hvis u=3. ]                                                                                                                 |         |                              |
| Kommentarer                                                                                                                          | Beundring (Nå kommer noen spørsmål om hva du personlig føler om asylsøkere. I hvilken grad har du følgende følelse                 |         |                              |
| Verdi                                                                                                                                | Merkelapp                                                                                                                          | Enheter | Prosent                      |
| 1                                                                                                                                    | I svært stor grad                                                                                                                  | 28      | <div><div></div></div> 0.6%  |
| 2                                                                                                                                    | I stor grad                                                                                                                        | 146     | <div><div></div></div> 3.1%  |
| 3                                                                                                                                    | I noen grad                                                                                                                        | 388     | <div><div></div></div> 8.3%  |
| 4                                                                                                                                    | I liten grad                                                                                                                       | 295     | <div><div></div></div> 6.3%  |
| 5                                                                                                                                    | Ikke i det hele tatt                                                                                                               | 151     | <div><div></div></div> 3.2%  |
| 97                                                                                                                                   | Ikke svart                                                                                                                         | 95      | <div><div></div></div> 2.0%  |
| 98                                                                                                                                   | Ikke spurt                                                                                                                         | 3586    | <div><div></div></div> 76.5% |
| Advarsel: disse tallene indikerer antall enheter (cases) i datafilen. De kan ikke tolkes som oppsummert statistikk for populasjonen. |                                                                                                                                    |         |                              |
| # r7dvby10_2: Følelse om asylsøkere som gruppe: Medfølelse                                                                           |                                                                                                                                    |         |                              |
| Informasjon                                                                                                                          | [Type= diskret] [Format=numeric] [Rekkevidde= 1-5] [Missing=*]                                                                     |         |                              |
| Statistikk [NW/ W]                                                                                                                   | [Gyldige=4689 /-] [Ugyldig=0 /-]                                                                                                   |         |                              |
| Tekst før spørsmål                                                                                                                   | Nå kommer noen spørsmål om hva du personlig føler om asylsøkere. I hvilken grad har du følgende følelser om asylsøkere som gruppe? |         |                              |
| Spørsmålstekst                                                                                                                       | Medfølelse                                                                                                                         |         |                              |
| Instruksjoner til intervjueren                                                                                                       | [Spurt hvis u=3. ]                                                                                                                 |         |                              |
| Kommentarer                                                                                                                          | Medfølelse (Nå kommer noen spørsmål om hva du personlig føler om asylsøkere. I hvilken grad har du følgende følel                  |         |                              |
| Verdi                                                                                                                                | Merkelapp                                                                                                                          | Enheter | Prosent                      |
| 1                                                                                                                                    | I svært stor grad                                                                                                                  | 164     | <div><div></div></div> 3.5%  |
| 2                                                                                                                                    | I stor grad                                                                                                                        | 457     | <div><div></div></div> 9.7%  |
| 3                                                                                                                                    | I noen grad                                                                                                                        | 337     | <div><div></div></div> 7.2%  |
| 4                                                                                                                                    | I liten grad                                                                                                                       | 62      | <div><div></div></div> 1.3%  |
| 5                                                                                                                                    | Ikke i det hele tatt                                                                                                               | 35      | <div><div></div></div> 0.7%  |
| 97                                                                                                                                   | Ikke svart                                                                                                                         | 48      | <div><div></div></div> 1.0%  |
| 98                                                                                                                                   | Ikke spurt                                                                                                                         | 3586    | <div><div></div></div> 76.5% |
| Advarsel: disse tallene indikerer antall enheter (cases) i datafilen. De kan ikke tolkes som oppsummert statistikk for populasjonen. |                                                                                                                                    |         |                              |
| # r7dvby10_3: Følelse om asylsøkere som gruppe: Angst                                                                                |                                                                                                                                    |         |                              |
| Informasjon                                                                                                                          | [Type= diskret] [Format=numeric] [Rekkevidde= 1-5] [Missing=*]                                                                     |         |                              |
| Statistikk [NW/ W]                                                                                                                   | [Gyldige=4689 /-] [Ugyldig=0 /-]                                                                                                   |         |                              |
| Tekst før spørsmål                                                                                                                   | Nå kommer noen spørsmål om hva du personlig føler om asylsøkere. I hvilken grad har du følgende følelser om asylsøkere som gruppe? |         |                              |
| Spørsmålstekst                                                                                                                       | Angst                                                                                                                              |         |                              |
| Instruksjoner til intervjueren                                                                                                       | [Spurt hvis u=3. ]                                                                                                                 |         |                              |
| Kommentarer                                                                                                                          | Angst (Nå kommer noen spørsmål om hva du personlig føler om asylsøkere. I hvilken grad har du følgende følelser om                 |         |                              |
| Verdi                                                                                                                                | Merkelapp                                                                                                                          | Enheter | Prosent                      |
| 1                                                                                                                                    | I svært stor grad                                                                                                                  | 8       | <div><div></div></div> 0.2%  |
| 2                                                                                                                                    | I stor grad                                                                                                                        | 35      | <div><div></div></div> 0.7%  |
| 3                                                                                                                                    | I noen grad                                                                                                                        | 146     | <div><div></div></div> 3.1%  |

| # r7dvby10_3: Følelse om asylsøkere som gruppe: Angst                                                                                |                                                                                                                                    |         |                        |       |
|--------------------------------------------------------------------------------------------------------------------------------------|------------------------------------------------------------------------------------------------------------------------------------|---------|------------------------|-------|
| Verdi                                                                                                                                | Merkelapp                                                                                                                          | Enheter | Prosent                |       |
| 4                                                                                                                                    | I liten grad                                                                                                                       | 448     | <div><div></div></div> | 9.6%  |
| 5                                                                                                                                    | Ikke i det hele tatt                                                                                                               | 379     | <div><div></div></div> | 8.1%  |
| 97                                                                                                                                   | Ikke svart                                                                                                                         | 87      | <div><div></div></div> | 1.9%  |
| 98                                                                                                                                   | Ikke spurt                                                                                                                         | 3586    | <div><div></div></div> | 76.5% |
| Advarsel: disse tallene indikerer antall enheter (cases) i datafilen. De kan ikke tolkes som oppsummert statistikk for populasjonen. |                                                                                                                                    |         |                        |       |
| # r7dvby10_4: Følelse om asylsøkere som gruppe: Frykt                                                                                |                                                                                                                                    |         |                        |       |
| Informasjon                                                                                                                          | [Type= diskret] [Format=numeric] [Rekkevidde= 1-5] [Missing=*]                                                                     |         |                        |       |
| Statistikk [NW/ W]                                                                                                                   | [Gyldige=4689 /-] [Ugyldig=0 /-]                                                                                                   |         |                        |       |
| Tekst før spørsmål                                                                                                                   | Nå kommer noen spørsmål om hva du personlig føler om asylsøkere. I hvilken grad har du følgende følelser om asylsøkere som gruppe? |         |                        |       |
| Spørsmålstekst                                                                                                                       | Frykt                                                                                                                              |         |                        |       |
| Instruksjoner til intervjueren                                                                                                       | [Spurt hvis u=3. ]                                                                                                                 |         |                        |       |
| Kommentarer                                                                                                                          | Frykt (Nå kommer noen spørsmål om hva du personlig føler om asylsøkere. I hvilken grad har du følgende følelser om                 |         |                        |       |
| Verdi                                                                                                                                | Merkelapp                                                                                                                          | Enheter | Prosent                |       |
| 1                                                                                                                                    | I svært stor grad                                                                                                                  | 20      | <div><div></div></div> | 0.4%  |
| 2                                                                                                                                    | I stor grad                                                                                                                        | 32      | <div><div></div></div> | 0.7%  |
| 3                                                                                                                                    | I noen grad                                                                                                                        | 157     | <div><div></div></div> | 3.3%  |
| 4                                                                                                                                    | I liten grad                                                                                                                       | 433     | <div><div></div></div> | 9.2%  |
| 5                                                                                                                                    | Ikke i det hele tatt                                                                                                               | 379     | <div><div></div></div> | 8.1%  |
| 97                                                                                                                                   | Ikke svart                                                                                                                         | 82      | <div><div></div></div> | 1.7%  |
| 98                                                                                                                                   | Ikke spurt                                                                                                                         | 3586    | <div><div></div></div> | 76.5% |
| Advarsel: disse tallene indikerer antall enheter (cases) i datafilen. De kan ikke tolkes som oppsummert statistikk for populasjonen. |                                                                                                                                    |         |                        |       |
| # r7dvby11_1: I hvilken grad har du tenkt på hvordan det er å komme til Norge som asylsøker?                                         |                                                                                                                                    |         |                        |       |
| Informasjon                                                                                                                          | [Type= diskret] [Format=numeric] [Rekkevidde= 1-5] [Missing=*]                                                                     |         |                        |       |
| Statistikk [NW/ W]                                                                                                                   | [Gyldige=4689 /-] [Ugyldig=0 /-]                                                                                                   |         |                        |       |
| Spørsmålstekst                                                                                                                       | I hvilken grad har du tenkt på og forestilt deg hvordan det føles å komme til Norge som asylsøker?                                 |         |                        |       |
| Instruksjoner til intervjueren                                                                                                       | [Spurt hvis u=3 eller u=4. ]                                                                                                       |         |                        |       |
| Kommentarer                                                                                                                          | R7DVBY11_1 (I hvilken grad har du tenkt på og forestilt deg hvordan det føles å komme til Norge som asylsøker?)                    |         |                        |       |
| Verdi                                                                                                                                | Merkelapp                                                                                                                          | Enheter | Prosent                |       |
| 1                                                                                                                                    | I svært stor grad                                                                                                                  | 188     | <div><div></div></div> | 4.0%  |
| 2                                                                                                                                    | I stor grad                                                                                                                        | 539     | <div><div></div></div> | 11.5% |
| 3                                                                                                                                    | I noen grad                                                                                                                        | 1044    | <div><div></div></div> | 22.3% |
| 4                                                                                                                                    | I liten grad                                                                                                                       | 345     | <div><div></div></div> | 7.4%  |
| 5                                                                                                                                    | Ikke i det hele tatt                                                                                                               | 130     | <div><div></div></div> | 2.8%  |
| 97                                                                                                                                   | Ikke svart                                                                                                                         | 60      | <div><div></div></div> | 1.3%  |
| 98                                                                                                                                   | Ikke spurt                                                                                                                         | 2383    | <div><div></div></div> | 50.8% |
| Advarsel: disse tallene indikerer antall enheter (cases) i datafilen. De kan ikke tolkes som oppsummert statistikk for populasjonen. |                                                                                                                                    |         |                        |       |
| # r7padpilot1: For/mot: EU-medlemskap                                                                                                |                                                                                                                                    |         |                        |       |
| Informasjon                                                                                                                          | [Type= diskret] [Format=numeric] [Rekkevidde= 1-3] [Missing=*]                                                                     |         |                        |       |
| Statistikk [NW/ W]                                                                                                                   | [Gyldige=4689 /-] [Ugyldig=0 /-]                                                                                                   |         |                        |       |
| Tekst før spørsmål                                                                                                                   | Nå kommer et par spørsmål om norsk EU-medlemskap.                                                                                  |         |                        |       |

| # r7padpilot1: For/mot: EU-medlemskap                                                                                                |                                |         |                   |
|--------------------------------------------------------------------------------------------------------------------------------------|--------------------------------|---------|-------------------|
| Spørsmålstekst                                                                                                                       | Først: Er du for eller mot?    |         |                   |
| Instruksjoner til intervjueren                                                                                                       | [Spurt hvis u=3. ]             |         |                   |
| Verdi                                                                                                                                | Merkelapp                      | Enheter | Prosent           |
| 1                                                                                                                                    | Jeg er for norsk EU-medlemskap | 249     | <div></div> 5.3%  |
| 2                                                                                                                                    | Jeg er mot norsk EU-medlemskap | 651     | <div></div> 13.9% |
| 3                                                                                                                                    | Vet ikke                       | 175     | <div></div> 3.7%  |
| 97                                                                                                                                   | Ikke svart                     | 28      | <div></div> 0.6%  |
| 98                                                                                                                                   | Ikke spurt                     | 3586    | <div></div> 76.5% |
| Advarsel: disse tallene indikerer antall enheter (cases) i datafilen. De kan ikke tolkes som oppsummert statistikk for populasjonen. |                                |         |                   |

| # r7padpilot2_ran: R7PADPILOT2_ran |                                                                                                                                    |         |                  |
|------------------------------------|------------------------------------------------------------------------------------------------------------------------------------|---------|------------------|
| Informasjon                        | [Type= diskret] [Format=numeric] [Rekkevidde= 1-144] [Missing=*]                                                                   |         |                  |
| Statistikk [NW/ W]                 | [Gyldige=1082 /-] [Ugyldig=3607 /-]                                                                                                |         |                  |
| Instruksjoner til intervjueren     | [Spurt hvis u=3. Én vignett er tilfeldig valgt ut av en populasjon bestående av 145 vignetter. Vignetten blir brukt i R7PADPILOT2] |         |                  |
| Verdi                              | Merkelapp                                                                                                                          | Enheter | Prosent          |
| 1                                  | 1                                                                                                                                  | 12      | <div></div> 1.1% |
| 2                                  | 2                                                                                                                                  | 4       | <div></div> 0.4% |
| 3                                  | 3                                                                                                                                  | 7       | <div></div> 0.6% |
| 4                                  | 4                                                                                                                                  | 4       | <div></div> 0.4% |
| 5                                  | La oss si at 35% av befolkningen deltok.                                                                                           | 5       | <div></div> 0.5% |
| 6                                  | La oss si at 47% av befolkningen deltok.                                                                                           | 8       | <div></div> 0.7% |
| 7                                  | La oss si at 53% av befolkningen deltok.                                                                                           | 7       | <div></div> 0.6% |
| 8                                  | La oss si at 85% av befolkningen deltok.                                                                                           | 8       | <div></div> 0.7% |
| 9                                  | 9                                                                                                                                  | 3       | <div></div> 0.3% |
| 10                                 | 10                                                                                                                                 | 9       | <div></div> 0.8% |
| 11                                 | 11                                                                                                                                 | 12      | <div></div> 1.1% |
| 12                                 | 12                                                                                                                                 | 10      | <div></div> 0.9% |
| 13                                 | La oss si at 35% av befolkningen deltok.                                                                                           | 4       | <div></div> 0.4% |
| 14                                 | La oss si at 47% av befolkningen deltok.                                                                                           | 6       | <div></div> 0.6% |
| 15                                 | La oss si at 53% av befolkningen deltok.                                                                                           | 11      | <div></div> 1.0% |
| 16                                 | La oss si at 85% av befolkningen deltok.                                                                                           | 12      | <div></div> 1.1% |
| 17                                 | 17                                                                                                                                 | 6       | <div></div> 0.6% |
| 18                                 | 18                                                                                                                                 | 7       | <div></div> 0.6% |
| 19                                 | 19                                                                                                                                 | 9       | <div></div> 0.8% |
| 20                                 | 20                                                                                                                                 | 4       | <div></div> 0.4% |
| 21                                 | La oss si at 35% av befolkningen deltok.                                                                                           | 9       | <div></div> 0.8% |
| 22                                 | La oss si at 47% av befolkningen deltok.                                                                                           | 13      | <div></div> 1.2% |
| 23                                 | La oss si at 53% av befolkningen deltok.                                                                                           | 5       | <div></div> 0.5% |
| 24                                 | La oss si at 85% av befolkningen deltok.                                                                                           | 10      | <div></div> 0.9% |
| 25                                 | La oss si at den vinnende siden fikk 51% av stemmene.                                                                              | 5       | <div></div> 0.5% |
| 26                                 | La oss si at den vinnende siden fikk 51% av stemmene.                                                                              | 8       | <div></div> 0.7% |
| 27                                 | La oss si at den vinnende siden fikk 51% av stemmene.                                                                              | 6       | <div></div> 0.6% |
| 28                                 | La oss si at den vinnende siden fikk 51% av stemmene.                                                                              | 5       | <div></div> 0.5% |
| 29                                 | La oss si at 35% av befolkningen deltok og at den vinnende siden fikk 51% av ste                                                   | 10      | <div></div> 0.9% |
| 30                                 | La oss si at 47% av befolkningen deltok og at den vinnende siden fikk 51% av ste                                                   | 4       | <div></div> 0.4% |
| 31                                 | La oss si at 53% av befolkningen deltok og at den vinnende siden fikk 51% av ste                                                   | 8       | <div></div> 0.7% |
| 32                                 | La oss si at 85% av befolkningen deltok og at den vinnende siden fikk 51% av ste                                                   | 11      | <div></div> 1.0% |
| 33                                 | La oss si at den vinnende siden fikk 55% av stemmene.                                                                              | 6       | <div></div> 0.6% |
| 34                                 | La oss si at den vinnende siden fikk 55% av stemmene.                                                                              | 9       | <div></div> 0.8% |
| 35                                 | La oss si at den vinnende siden fikk 55% av stemmene.                                                                              | 5       | <div></div> 0.5% |
| 36                                 | La oss si at den vinnende siden fikk 55% av stemmene.                                                                              | 6       | <div></div> 0.6% |
| 37                                 | La oss si at 35% av befolkningen deltok og at den vinnende siden fikk 55% av ste                                                   | 8       | <div></div> 0.7% |

# # r7padpilot2\_ran: R7PADPILOT2\_ran

| Verdi | Merkelapp                                                                        | Enheter | Prosent          |
|-------|----------------------------------------------------------------------------------|---------|------------------|
| 38    | La oss si at 47% av befolkningen deltok og at den vinnende siden fikk 55% av ste | 5       | <div></div> 0.5% |
| 39    | La oss si at 53% av befolkningen deltok og at den vinnende siden fikk 55% av ste | 6       | <div></div> 0.6% |
| 40    | La oss si at 85% av befolkningen deltok og at den vinnende siden fikk 55% av ste | 5       | <div></div> 0.5% |
| 41    | La oss si at den vinnende siden fikk 70% av stemmene.                            | 12      | <div></div> 1.1% |
| 42    | La oss si at den vinnende siden fikk 70% av stemmene.                            | 9       | <div></div> 0.8% |
| 43    | La oss si at den vinnende siden fikk 70% av stemmene.                            | 7       | <div></div> 0.6% |
| 44    | La oss si at den vinnende siden fikk 70% av stemmene.                            | 7       | <div></div> 0.6% |
| 45    | La oss si at 35% av befolkningen deltok og at den vinnende siden fikk 70% av ste | 12      | <div></div> 1.1% |
| 46    | La oss si at 47% av befolkningen deltok og at den vinnende siden fikk 70% av ste | 8       | <div></div> 0.7% |
| 47    | La oss si at 53% av befolkningen deltok og at den vinnende siden fikk 70% av ste | 9       | <div></div> 0.8% |
| 48    | La oss si at 85% av befolkningen deltok og at den vinnende siden fikk 70% av ste | 9       | <div></div> 0.8% |
| 49    | La oss si at ja-siden fikk flertall.                                             | 6       | <div></div> 0.6% |
| 50    | La oss si at ja-siden fikk flertall.                                             | 6       | <div></div> 0.6% |
| 51    | La oss si at ja-siden fikk flertall.                                             | 11      | <div></div> 1.0% |
| 52    | La oss si at ja-siden fikk flertall.                                             | 5       | <div></div> 0.5% |
| 53    | La oss si at 35% av befolkningen deltok og at ja-siden fikk flertall.            | 5       | <div></div> 0.5% |
| 54    | La oss si at 47% av befolkningen deltok og at ja-siden fikk flertall.            | 4       | <div></div> 0.4% |
| 55    | La oss si at 53% av befolkningen deltok og at ja-siden fikk flertall.            | 8       | <div></div> 0.7% |
| 56    | La oss si at 85% av befolkningen deltok og at ja-siden fikk flertall.            | 9       | <div></div> 0.8% |
| 57    | La oss si at ja-siden fikk flertall.                                             | 6       | <div></div> 0.6% |
| 58    | La oss si at ja-siden fikk flertall.                                             | 8       | <div></div> 0.7% |
| 59    | La oss si at ja-siden fikk flertall.                                             | 5       | <div></div> 0.5% |
| 60    | La oss si at ja-siden fikk flertall.                                             | 1       | <div></div> 0.1% |
| 61    | La oss si at 35% av befolkningen deltok og at ja-siden fikk flertall.            | 7       | <div></div> 0.6% |
| 62    | La oss si at 47% av befolkningen deltok og at ja-siden fikk flertall.            | 5       | <div></div> 0.5% |
| 63    | La oss si at 53% av befolkningen deltok og at ja-siden fikk flertall.            | 6       | <div></div> 0.6% |
| 64    | La oss si at 85% av befolkningen deltok og at ja-siden fikk flertall.            | 7       | <div></div> 0.6% |
| 65    | La oss si at ja-siden fikk flertall.                                             | 8       | <div></div> 0.7% |
| 66    | La oss si at ja-siden fikk flertall.                                             | 15      | <div></div> 1.4% |
| 67    | La oss si at ja-siden fikk flertall.                                             | 2       | <div></div> 0.2% |
| 68    | La oss si at ja-siden fikk flertall.                                             | 10      | <div></div> 0.9% |
| 69    | La oss si at 35% av befolkningen deltok og at ja-siden fikk flertall.            | 3       | <div></div> 0.3% |
| 70    | La oss si at 47% av befolkningen deltok og at ja-siden fikk flertall.            | 7       | <div></div> 0.6% |
| 71    | La oss si at 53% av befolkningen deltok og at ja-siden fikk flertall.            | 5       | <div></div> 0.5% |
| 72    | La oss si at 85% av befolkningen deltok og at ja-siden fikk flertall.            | 7       | <div></div> 0.6% |
| 73    | La oss si at ja-siden fikk 51% av stemmene.                                      | 14      | <div></div> 1.3% |
| 74    | La oss si at ja-siden fikk 51% av stemmene.                                      | 8       | <div></div> 0.7% |
| 75    | La oss si at ja-siden fikk 51% av stemmene.                                      | 8       | <div></div> 0.7% |
| 76    | La oss si at ja-siden fikk 51% av stemmene.                                      | 3       | <div></div> 0.3% |
| 77    | La oss si at 35% av befolkningen deltok og at ja-siden fikk 51% av stemmene.     | 7       | <div></div> 0.6% |

# # r7padpilot2\_ran: R7PADPILOT2\_ran

| Verdi | Merkelapp                                                                    | Enheter | Prosent          |
|-------|------------------------------------------------------------------------------|---------|------------------|
| 78    | La oss si at 47% av befolkningen deltok og at ja-siden fikk 51% av stemmene. | 6       | <div></div> 0.6% |
| 79    | La oss si at 53% av befolkningen deltok og at ja-siden fikk 51% av stemmene. | 5       | <div></div> 0.5% |
| 80    | La oss si at 85% av befolkningen deltok og at ja-siden fikk 51% av stemmene. | 8       | <div></div> 0.7% |
| 81    | La oss si at ja-siden fikk 55% av stemmene.                                  | 9       | <div></div> 0.8% |
| 82    | La oss si at ja-siden fikk 55% av stemmene.                                  | 7       | <div></div> 0.6% |
| 83    | La oss si at ja-siden fikk 55% av stemmene.                                  | 6       | <div></div> 0.6% |
| 84    | La oss si at ja-siden fikk 55% av stemmene.                                  | 10      | <div></div> 0.9% |
| 85    | La oss si at 35% av befolkningen deltok og at ja-siden fikk 55% av stemmene. | 7       | <div></div> 0.6% |
| 86    | La oss si at 47% av befolkningen deltok og at ja-siden fikk 55% av stemmene. | 13      | <div></div> 1.2% |
| 87    | La oss si at 53% av befolkningen deltok og at ja-siden fikk 55% av stemmene. | 11      | <div></div> 1.0% |
| 88    | La oss si at 85% av befolkningen deltok og at ja-siden fikk 55% av stemmene. | 5       | <div></div> 0.5% |
| 89    | La oss si at ja-siden fikk 70% av stemmene.                                  | 7       | <div></div> 0.6% |
| 90    | La oss si at ja-siden fikk 70% av stemmene.                                  | 8       | <div></div> 0.7% |
| 91    | La oss si at ja-siden fikk 70% av stemmene.                                  | 9       | <div></div> 0.8% |
| 92    | La oss si at ja-siden fikk 70% av stemmene.                                  | 9       | <div></div> 0.8% |
| 93    | La oss si at 35% av befolkningen deltok og at ja-siden fikk 70% av stemmene. | 9       | <div></div> 0.8% |
| 94    | La oss si at 47% av befolkningen deltok og at ja-siden fikk 70% av stemmene. | 9       | <div></div> 0.8% |
| 95    | La oss si at 53% av befolkningen deltok og at ja-siden fikk 70% av stemmene. | 8       | <div></div> 0.7% |
| 96    | La oss si at 85% av befolkningen deltok og at ja-siden fikk 70% av stemmene. | 7       | <div></div> 0.6% |
| 97    | La oss si at nei-siden fikk flertall.                                        | 6       | <div></div> 0.6% |
| 98    | La oss si at nei-siden fikk flertall.                                        | 4       | <div></div> 0.4% |
| 99    | La oss si at nei-siden fikk flertall.                                        | 5       | <div></div> 0.5% |
| 100   | La oss si at nei-siden fikk flertall.                                        | 12      | <div></div> 1.1% |
| 101   | La oss si at 35% av befolkningen deltok og at nei-siden fikk flertall.       | 8       | <div></div> 0.7% |
| 102   | La oss si at 47% av befolkningen deltok og at nei-siden fikk flertall.       | 4       | <div></div> 0.4% |
| 103   | La oss si at 53% av befolkningen deltok og at nei-siden fikk flertall.       | 7       | <div></div> 0.6% |
| 104   | La oss si at 85% av befolkningen deltok og at nei-siden fikk flertall.       | 9       | <div></div> 0.8% |
| 105   | La oss si at nei-siden fikk flertall.                                        | 11      | <div></div> 1.0% |
| 106   | La oss si at nei-siden fikk flertall.                                        | 2       | <div></div> 0.2% |
| 107   | La oss si at nei-siden fikk flertall.                                        | 7       | <div></div> 0.6% |
| 108   | La oss si at nei-siden fikk flertall.                                        | 5       | <div></div> 0.5% |
| 109   | La oss si at 35% av befolkningen deltok og at nei-siden fikk flertall.       | 5       | <div></div> 0.5% |
| 110   | La oss si at 47% av befolkningen deltok og at nei-siden fikk flertall.       | 5       | <div></div> 0.5% |
| 111   | La oss si at 53% av befolkningen deltok og at nei-siden fikk flertall.       | 12      | <div></div> 1.1% |
| 112   | La oss si at 85% av befolkningen deltok og at nei-siden fikk flertall.       | 8       | <div></div> 0.7% |
| 113   | La oss si at nei-siden fikk flertall.                                        | 5       | <div></div> 0.5% |
| 114   | La oss si at nei-siden fikk flertall.                                        | 7       | <div></div> 0.6% |
| 115   | La oss si at nei-siden fikk flertall.                                        | 14      | <div></div> 1.3% |

| # r7padpilot2_ran: R7PADPILOT2_ran                                                                                                   |                                                                                                                                                                                                                                                              |         |                             |
|--------------------------------------------------------------------------------------------------------------------------------------|--------------------------------------------------------------------------------------------------------------------------------------------------------------------------------------------------------------------------------------------------------------|---------|-----------------------------|
| Verdi                                                                                                                                | Merkelapp                                                                                                                                                                                                                                                    | Enheter | Prosent                     |
| 116                                                                                                                                  | La oss si at nei-siden fikk flertall.                                                                                                                                                                                                                        | 8       | <div><div></div></div> 0.7% |
| 117                                                                                                                                  | La oss si at 35% av befolkningen deltok og at nei-siden fikk flertall.                                                                                                                                                                                       | 4       | <div><div></div></div> 0.4% |
| 118                                                                                                                                  | La oss si at 47% av befolkningen deltok og at nei-siden fikk flertall.                                                                                                                                                                                       | 5       | <div><div></div></div> 0.5% |
| 119                                                                                                                                  | La oss si at 53% av befolkningen deltok og at nei-siden fikk flertall.                                                                                                                                                                                       | 11      | <div><div></div></div> 1.0% |
| 120                                                                                                                                  | La oss si at 85% av befolkningen deltok og at nei-siden fikk flertall.                                                                                                                                                                                       | 6       | <div><div></div></div> 0.6% |
| 121                                                                                                                                  | La oss si at nei-siden fikk 51% av stemmene.                                                                                                                                                                                                                 | 11      | <div><div></div></div> 1.0% |
| 122                                                                                                                                  | La oss si at nei-siden fikk 51% av stemmene.                                                                                                                                                                                                                 | 9       | <div><div></div></div> 0.8% |
| 123                                                                                                                                  | La oss si at nei-siden fikk 51% av stemmene.                                                                                                                                                                                                                 | 10      | <div><div></div></div> 0.9% |
| 124                                                                                                                                  | La oss si at nei-siden fikk 51% av stemmene.                                                                                                                                                                                                                 | 8       | <div><div></div></div> 0.7% |
| 125                                                                                                                                  | La oss si at 35% av befolkningen deltok og at nei-siden fikk 51% av stemmene.                                                                                                                                                                                | 8       | <div><div></div></div> 0.7% |
| 126                                                                                                                                  | La oss si at 47% av befolkningen deltok og at nei-siden fikk 51% av stemmene.                                                                                                                                                                                | 9       | <div><div></div></div> 0.8% |
| 127                                                                                                                                  | La oss si at 53% av befolkningen deltok og at nei-siden fikk 51% av stemmene.                                                                                                                                                                                | 7       | <div><div></div></div> 0.6% |
| 128                                                                                                                                  | La oss si at 85% av befolkningen deltok og at nei-siden fikk 51% av stemmene.                                                                                                                                                                                | 6       | <div><div></div></div> 0.6% |
| 129                                                                                                                                  | La oss si at nei-siden fikk 55% av stemmene.                                                                                                                                                                                                                 | 8       | <div><div></div></div> 0.7% |
| 130                                                                                                                                  | La oss si at nei-siden fikk 55% av stemmene.                                                                                                                                                                                                                 | 8       | <div><div></div></div> 0.7% |
| 131                                                                                                                                  | La oss si at nei-siden fikk 55% av stemmene.                                                                                                                                                                                                                 | 7       | <div><div></div></div> 0.6% |
| 132                                                                                                                                  | La oss si at nei-siden fikk 55% av stemmene.                                                                                                                                                                                                                 | 7       | <div><div></div></div> 0.6% |
| 133                                                                                                                                  | La oss si at 35% av befolkningen deltok og at nei-siden fikk 55% av stemmene.                                                                                                                                                                                | 10      | <div><div></div></div> 0.9% |
| 134                                                                                                                                  | La oss si at 47% av befolkningen deltok og at nei-siden fikk 55% av stemmene.                                                                                                                                                                                | 10      | <div><div></div></div> 0.9% |
| 135                                                                                                                                  | La oss si at 53% av befolkningen deltok og at nei-siden fikk 55% av stemmene.                                                                                                                                                                                | 11      | <div><div></div></div> 1.0% |
| 136                                                                                                                                  | La oss si at 85% av befolkningen deltok og at nei-siden fikk 55% av stemmene.                                                                                                                                                                                | 11      | <div><div></div></div> 1.0% |
| 137                                                                                                                                  | La oss si at nei-siden fikk 70% av stemmene.                                                                                                                                                                                                                 | 7       | <div><div></div></div> 0.6% |
| 138                                                                                                                                  | La oss si at nei-siden fikk 70% av stemmene.                                                                                                                                                                                                                 | 7       | <div><div></div></div> 0.6% |
| 139                                                                                                                                  | La oss si at nei-siden fikk 70% av stemmene.                                                                                                                                                                                                                 | 9       | <div><div></div></div> 0.8% |
| 140                                                                                                                                  | La oss si at nei-siden fikk 70% av stemmene.                                                                                                                                                                                                                 | 9       | <div><div></div></div> 0.8% |
| 141                                                                                                                                  | La oss si at 35% av befolkningen deltok og at nei-siden fikk 70% av stemmene.                                                                                                                                                                                | 6       | <div><div></div></div> 0.6% |
| 142                                                                                                                                  | La oss si at 47% av befolkningen deltok og at nei-siden fikk 70% av stemmene.                                                                                                                                                                                | 10      | <div><div></div></div> 0.9% |
| 143                                                                                                                                  | La oss si at 53% av befolkningen deltok og at nei-siden fikk 70% av stemmene.                                                                                                                                                                                | 5       | <div><div></div></div> 0.5% |
| 144                                                                                                                                  | La oss si at 85% av befolkningen deltok og at nei-siden fikk 70% av stemmene.                                                                                                                                                                                | 5       | <div><div></div></div> 0.5% |
| Sysmiss                                                                                                                              |                                                                                                                                                                                                                                                              | 3607    |                             |
| Advarsel: disse tallene indikerer antall enheter (cases) i datafilen. De kan ikke tolkes som oppsummert statistikk for populasjonen. |                                                                                                                                                                                                                                                              |         |                             |
| # r7padpilot2: Burde regjeringen følge resultat i folkeavstemning selv om flertall i Stortinget er uenig?                            |                                                                                                                                                                                                                                                              |         |                             |
| Informasjon                                                                                                                          | [Type= diskret] [Format=numeric] [Rekkevidde= 1-2] [Missing=*]                                                                                                                                                                                               |         |                             |
| Statistikk [NW/ W]                                                                                                                   | [Gyldige=4689 /-] [Ugyldig=0 /-]                                                                                                                                                                                                                             |         |                             |
| Tekst før spørsmål                                                                                                                   | Vi er interessert i å undersøke hvilket mandat regjeringen trenger for å ta viktige valg på vegne av folket. Se for deg at det kom en ny debatt om norsk EU-medlemskap og at det ble holdt en rådgivende folkeavstemning om saken.<br>^f('R7PADPILOT2_ran')^ |         |                             |



| # r7padpilot2: Burde regjeringen følge resultat i folkeavstemning selv om flertall i Stortinget er uenig?                            |                                                                                                                                                   |         |                        |       |
|--------------------------------------------------------------------------------------------------------------------------------------|---------------------------------------------------------------------------------------------------------------------------------------------------|---------|------------------------|-------|
| Spørsmålstekst                                                                                                                       | I et sånt tilfelle, burde regjeringen følge resultatet i folkeavstemningen selv om flertallet i Stortinget er uenig?                              |         |                        |       |
| Instruksjoner til intervjueren                                                                                                       | [Spurt hvis u=3. Eksperiment som bruker vignetter. Spørsmålsformulering varierer etter hvilken vignett som er tilfeldig valgt i R7PADPILOT2_ran.] |         |                        |       |
| Kommentarer                                                                                                                          | Vi er interessert i å undersøke hvilket mandat regjeringen trenger for å ta viktige valg på vegne av folket. Se for d                             |         |                        |       |
| Verdi                                                                                                                                | Merkelapp                                                                                                                                         | Enheter | Prosent                |       |
| 1                                                                                                                                    | Yes                                                                                                                                               | 817     | <div><div></div></div> | 17.4% |
| 2                                                                                                                                    | No                                                                                                                                                | 248     | <div><div></div></div> | 5.3%  |
| 97                                                                                                                                   | Ikke svart                                                                                                                                        | 38      | <div><div></div></div> | 0.8%  |
| 98                                                                                                                                   | Ikke spurt                                                                                                                                        | 3586    | <div><div></div></div> | 76.5% |
| Advarsel: disse tallene indikerer antall enheter (cases) i datafilen. De kan ikke tolkes som oppsummert statistikk for populasjonen. |                                                                                                                                                   |         |                        |       |
| # r7dv29_1: Utsagn: Tigging bør være forbudt                                                                                         |                                                                                                                                                   |         |                        |       |
| Informasjon                                                                                                                          | [Type= diskret] [Format=numeric] [Rekkevidde= 1-7] [Missing=*]                                                                                    |         |                        |       |
| Statistikk [NW/ W]                                                                                                                   | [Gyldige=4689 /-] [Ugyldig=0 /-]                                                                                                                  |         |                        |       |
| Tekst før spørsmål                                                                                                                   | Se på utsagnene nedenfor. Hvor enig eller uenig er du i dem?                                                                                      |         |                        |       |
| Spørsmålstekst                                                                                                                       | Tigging bør være forbudt i Norge.                                                                                                                 |         |                        |       |
| Instruksjoner til intervjueren                                                                                                       | [Spurt hvis u=4. ]                                                                                                                                |         |                        |       |
| Kommentarer                                                                                                                          | Tigging bør være forbudt i Norge. (Se på utsagnene nedenfor. Hvor enig eller uenig er du i dem? )                                                 |         |                        |       |
| Verdi                                                                                                                                | Merkelapp                                                                                                                                         | Enheter | Prosent                |       |
| 1                                                                                                                                    | Svært enig                                                                                                                                        | 288     | <div><div></div></div> | 6.1%  |
| 2                                                                                                                                    | Enig                                                                                                                                              | 256     | <div><div></div></div> | 5.5%  |
| 3                                                                                                                                    | Noe enig                                                                                                                                          | 209     | <div><div></div></div> | 4.5%  |
| 4                                                                                                                                    | Verken enig eller uenig                                                                                                                           | 147     | <div><div></div></div> | 3.1%  |
| 5                                                                                                                                    | Noe uenig                                                                                                                                         | 99      | <div><div></div></div> | 2.1%  |
| 6                                                                                                                                    | Uenig                                                                                                                                             | 128     | <div><div></div></div> | 2.7%  |
| 7                                                                                                                                    | Svært uenig                                                                                                                                       | 51      | <div><div></div></div> | 1.1%  |
| 97                                                                                                                                   | Ikke svart                                                                                                                                        | 25      | <div><div></div></div> | 0.5%  |
| 98                                                                                                                                   | Ikke spurt                                                                                                                                        | 3486    | <div><div></div></div> | 74.3% |
| Advarsel: disse tallene indikerer antall enheter (cases) i datafilen. De kan ikke tolkes som oppsummert statistikk for populasjonen. |                                                                                                                                                   |         |                        |       |
| # r7dv29_2: Utsagn: Norske muslimer mer lojale overfor muslimer i verden enn overfor folk i dette landet                             |                                                                                                                                                   |         |                        |       |
| Informasjon                                                                                                                          | [Type= diskret] [Format=numeric] [Rekkevidde= 1-7] [Missing=*]                                                                                    |         |                        |       |
| Statistikk [NW/ W]                                                                                                                   | [Gyldige=4689 /-] [Ugyldig=0 /-]                                                                                                                  |         |                        |       |
| Tekst før spørsmål                                                                                                                   | Se på utsagnene nedenfor. Hvor enig eller uenig er du i dem?                                                                                      |         |                        |       |
| Spørsmålstekst                                                                                                                       | Norske muslimer er mer lojale overfor andre muslimer i verden enn overfor folk i dette landet.                                                    |         |                        |       |
| Instruksjoner til intervjueren                                                                                                       | [Spurt hvis u=4. ]                                                                                                                                |         |                        |       |
| Kommentarer                                                                                                                          | Norske muslimer er mer lojale overfor andre muslimer i verden enn overfor folk i dette landet. (Se på utsagnene nedenfor                          |         |                        |       |
| Verdi                                                                                                                                | Merkelapp                                                                                                                                         | Enheter | Prosent                |       |
| 1                                                                                                                                    | Svært enig                                                                                                                                        | 125     | <div><div></div></div> | 2.7%  |
| 2                                                                                                                                    | Enig                                                                                                                                              | 191     | <div><div></div></div> | 4.1%  |
| 3                                                                                                                                    | Noe enig                                                                                                                                          | 238     | <div><div></div></div> | 5.1%  |
| 4                                                                                                                                    | Verken enig eller uenig                                                                                                                           | 345     | <div><div></div></div> | 7.4%  |
| 5                                                                                                                                    | Noe uenig                                                                                                                                         | 119     | <div><div></div></div> | 2.5%  |
| 6                                                                                                                                    | Uenig                                                                                                                                             | 132     | <div><div></div></div> | 2.8%  |

| # r7dv29_2: Utsagn: Norske muslimer mer lojale overfor muslimer i verden enn overfor folk i dette landet                             |                                                                                                                                   |         |         |
|--------------------------------------------------------------------------------------------------------------------------------------|-----------------------------------------------------------------------------------------------------------------------------------|---------|---------|
| Verdi                                                                                                                                | Merkelapp                                                                                                                         | Enheter | Prosent |
| 7                                                                                                                                    | Svært uenig                                                                                                                       | 23      | 0.5%    |
| 97                                                                                                                                   | Ikke svart                                                                                                                        | 30      | 0.6%    |
| 98                                                                                                                                   | Ikke spurt                                                                                                                        | 3486    | 74.3%   |
| Advarsel: disse tallene indikerer antall enheter (cases) i datafilen. De kan ikke tolkes som oppsummert statistikk for populasjonen. |                                                                                                                                   |         |         |
| # r7dv29_3: Utsagn: Norge mister sin identitet hvis flere muslimer kommer for å bo her                                               |                                                                                                                                   |         |         |
| Informasjon                                                                                                                          | [Type= diskret] [Format=numeric] [Rekkevidde= 1-7] [Missing=*]                                                                    |         |         |
| Statistikk [NW/ W]                                                                                                                   | [Gyldige=4689 /-] [Ugyldig=0 /-]                                                                                                  |         |         |
| Tekst før spørsmål                                                                                                                   | Se på utsagnene nedenfor. Hvor enig eller uenig er du i dem?                                                                      |         |         |
| Spørsmålstekst                                                                                                                       | Norge kommer til å miste sin identitet hvis flere muslimer kommer for å bo her.                                                   |         |         |
| Instruksjoner til intervjueren                                                                                                       | [Spurt hvis u=4. ]                                                                                                                |         |         |
| Kommentarer                                                                                                                          | Norge kommer til å miste sin identitet hvis flere muslimer kommer for å bo her. (Se på utsagnene nedenfor. Hvor enig e            |         |         |
| Verdi                                                                                                                                | Merkelapp                                                                                                                         | Enheter | Prosent |
| 1                                                                                                                                    | Svært enig                                                                                                                        | 138     | 2.9%    |
| 2                                                                                                                                    | Enig                                                                                                                              | 135     | 2.9%    |
| 3                                                                                                                                    | Noe enig                                                                                                                          | 233     | 5.0%    |
| 4                                                                                                                                    | Verken enig eller uenig                                                                                                           | 157     | 3.3%    |
| 5                                                                                                                                    | Noe uenig                                                                                                                         | 129     | 2.8%    |
| 6                                                                                                                                    | Uenig                                                                                                                             | 268     | 5.7%    |
| 7                                                                                                                                    | Svært uenig                                                                                                                       | 112     | 2.4%    |
| 97                                                                                                                                   | Ikke svart                                                                                                                        | 31      | 0.7%    |
| 98                                                                                                                                   | Ikke spurt                                                                                                                        | 3486    | 74.3%   |
| Advarsel: disse tallene indikerer antall enheter (cases) i datafilen. De kan ikke tolkes som oppsummert statistikk for populasjonen. |                                                                                                                                   |         |         |
| # r7dv39: Hvor ofte tenker/leser/snakker du om noe som har med 22. juli å gjøre?                                                     |                                                                                                                                   |         |         |
| Informasjon                                                                                                                          | [Type= diskret] [Format=numeric] [Rekkevidde= 1-5] [Missing=*]                                                                    |         |         |
| Statistikk [NW/ W]                                                                                                                   | [Gyldige=4689 /-] [Ugyldig=0 /-]                                                                                                  |         |         |
| Tekst før spørsmål                                                                                                                   | Nå har det gått mer enn fem år siden angrepene på regjeringskvartalet og Utøya 22. juli 2011.                                     |         |         |
| Spørsmålstekst                                                                                                                       | Når det gjelder deg personlig, hvor ofte vil du si at du tenker på, leser eller snakker om noe som har med 22. juli nå for tiden? |         |         |
| Instruksjoner til intervjueren                                                                                                       | [Spurt hvis u=4. ]                                                                                                                |         |         |
| Kommentarer                                                                                                                          | Nå har det gått mer enn fem år siden angrepene på regjeringskvartalet og Utøya 22. juli 2011. Når det gjelder deg p               |         |         |
| Verdi                                                                                                                                | Merkelapp                                                                                                                         | Enheter | Prosent |
| 1                                                                                                                                    | Daglig                                                                                                                            | 4       | 0.1%    |
| 2                                                                                                                                    | Ukentlig                                                                                                                          | 63      | 1.3%    |
| 3                                                                                                                                    | Noen ganger i måneden                                                                                                             | 261     | 5.6%    |
| 4                                                                                                                                    | Sjeldnere, men det hender                                                                                                         | 732     | 15.6%   |
| 5                                                                                                                                    | Aldri                                                                                                                             | 113     | 2.4%    |
| 97                                                                                                                                   | Ikke svart                                                                                                                        | 30      | 0.6%    |
| 98                                                                                                                                   | Ikke spurt                                                                                                                        | 3486    | 74.3%   |
| Advarsel: disse tallene indikerer antall enheter (cases) i datafilen. De kan ikke tolkes som oppsummert statistikk for populasjonen. |                                                                                                                                   |         |         |
| # r7dvby3_1: Grad av frykt for nytt terrorangrep i Norge                                                                             |                                                                                                                                   |         |         |
| Informasjon                                                                                                                          | [Type= diskret] [Format=numeric] [Rekkevidde= 1-5] [Missing=*]                                                                    |         |         |
| Statistikk [NW/ W]                                                                                                                   | [Gyldige=4689 /-] [Ugyldig=0 /-]                                                                                                  |         |         |

| # r7dvby3_1: Grad av frykt for nytt terrorangrep i Norge                                                                             |                                                                                                                                   |         |                              |
|--------------------------------------------------------------------------------------------------------------------------------------|-----------------------------------------------------------------------------------------------------------------------------------|---------|------------------------------|
| Spørsmålstekst                                                                                                                       | I hvor stor grad er du redd for at vi skal oppleve et nytt terrorangrep i Norge?                                                  |         |                              |
| Instruksjoner til intervjueren                                                                                                       | [Spurt hvis u=3 eller u=4. ]                                                                                                      |         |                              |
| Kommentarer                                                                                                                          | R7DVBY3_1 (I hvor stor grad er du redd for at vi skal oppleve et nytt terrorangrep i Norge?)                                      |         |                              |
| Verdi                                                                                                                                | Merkelapp                                                                                                                         | Enheter | Prosent                      |
| 1                                                                                                                                    | I svært stor grad                                                                                                                 | 94      | <div><div></div></div> 2.0%  |
| 2                                                                                                                                    | I stor grad                                                                                                                       | 326     | <div><div></div></div> 7.0%  |
| 3                                                                                                                                    | I noen grad                                                                                                                       | 948     | <div><div></div></div> 20.2% |
| 4                                                                                                                                    | I liten grad                                                                                                                      | 769     | <div><div></div></div> 16.4% |
| 5                                                                                                                                    | Ikke i det hele tatt                                                                                                              | 117     | <div><div></div></div> 2.5%  |
| 97                                                                                                                                   | Ikke svart                                                                                                                        | 52      | <div><div></div></div> 1.1%  |
| 98                                                                                                                                   | Ikke spurt                                                                                                                        | 2383    | <div><div></div></div> 50.8% |
| Advarsel: disse tallene indikerer antall enheter (cases) i datafilen. De kan ikke tolkes som oppsummert statistikk for populasjonen. |                                                                                                                                   |         |                              |
| # r7dvby4: Terrorfaren blitt større/mindre de siste årene                                                                            |                                                                                                                                   |         |                              |
| Informasjon                                                                                                                          | [Type= diskret] [Format=numeric] [Rekkevidde= 1-3] [Missing=*]                                                                    |         |                              |
| Statistikk [NW/ W]                                                                                                                   | [Gyldige=4689 /-] [Ugyldig=0 /-]                                                                                                  |         |                              |
| Spørsmålstekst                                                                                                                       | Slik du opplever det, har terrorfaren i Norge blitt større eller mindre de siste par årene, eller har det ikke vært noen endring? |         |                              |
| Instruksjoner til intervjueren                                                                                                       | [Spurt hvis u=3 eller u=4. ]                                                                                                      |         |                              |
| Kommentarer                                                                                                                          | Slik du opplever det, har terrorfaren i Norge blitt større eller mindre de siste par årene, eller har det ikke vært no            |         |                              |
| Verdi                                                                                                                                | Merkelapp                                                                                                                         | Enheter | Prosent                      |
| 1                                                                                                                                    | Større                                                                                                                            | 1195    | <div><div></div></div> 25.5% |
| 2                                                                                                                                    | Mindre                                                                                                                            | 90      | <div><div></div></div> 1.9%  |
| 3                                                                                                                                    | Ingen endring i terrorfaren                                                                                                       | 961     | <div><div></div></div> 20.5% |
| 97                                                                                                                                   | Ikke svart                                                                                                                        | 60      | <div><div></div></div> 1.3%  |
| 98                                                                                                                                   | Ikke spurt                                                                                                                        | 2383    | <div><div></div></div> 50.8% |
| Advarsel: disse tallene indikerer antall enheter (cases) i datafilen. De kan ikke tolkes som oppsummert statistikk for populasjonen. |                                                                                                                                   |         |                              |
| # r7pad9_1: Påstand: Kan som regel stole på riktige avgjørelser fra Høyesterett                                                      |                                                                                                                                   |         |                              |
| Informasjon                                                                                                                          | [Type= diskret] [Format=numeric] [Rekkevidde= 1-7] [Missing=*]                                                                    |         |                              |
| Statistikk [NW/ W]                                                                                                                   | [Gyldige=4689 /-] [Ugyldig=0 /-]                                                                                                  |         |                              |
| Tekst før spørsmål                                                                                                                   | Generelt sett, i hvilken grad er du enig eller uenig i følgende påstander:                                                        |         |                              |
| Spørsmålstekst                                                                                                                       | Vi kan som regel stole på at Norges Høyesterett tar riktige avgjørelser.                                                          |         |                              |
| Instruksjoner til intervjueren                                                                                                       | [Spurt hvis u=3. ]                                                                                                                |         |                              |
| Kommentarer                                                                                                                          | Vi kan som regel stole på at Norges Høyesterett tar riktige avgjørelser. (Generelt sett, i hvilken grad er du enig ell            |         |                              |
| Verdi                                                                                                                                | Merkelapp                                                                                                                         | Enheter | Prosent                      |
| 1                                                                                                                                    | Svært enig                                                                                                                        | 187     | <div><div></div></div> 4.0%  |
| 2                                                                                                                                    | Enig                                                                                                                              | 609     | <div><div></div></div> 13.0% |
| 3                                                                                                                                    | Noe enig                                                                                                                          | 147     | <div><div></div></div> 3.1%  |
| 4                                                                                                                                    | Verken enig eller uenig                                                                                                           | 76      | <div><div></div></div> 1.6%  |
| 5                                                                                                                                    | Noe uenig                                                                                                                         | 38      | <div><div></div></div> 0.8%  |
| 6                                                                                                                                    | Uenig                                                                                                                             | 13      | <div><div></div></div> 0.3%  |
| 7                                                                                                                                    | Svært uenig                                                                                                                       | 1       | <div><div></div></div> 0.0%  |
| 97                                                                                                                                   | Ikke svart                                                                                                                        | 32      | <div><div></div></div> 0.7%  |

| # r7pad9_1: Påstand: Kan som regel stole på riktige avgjørelser fra Høyesterett                                                      |                         |                                                                                                                         |             |         |                   |
|--------------------------------------------------------------------------------------------------------------------------------------|-------------------------|-------------------------------------------------------------------------------------------------------------------------|-------------|---------|-------------------|
| Verdi                                                                                                                                |                         | Merkelapp                                                                                                               |             | Enheter | Prosent           |
| 98                                                                                                                                   |                         | Ikke spurt                                                                                                              |             | 3586    | <div></div> 76.5% |
| Advarsel: disse tallene indikerer antall enheter (cases) i datafilen. De kan ikke tolkes som oppsummert statistikk for populasjonen. |                         |                                                                                                                         |             |         |                   |
| # r7pad9_2: Påstand: Høyesteretts makt i kontroversielle saker bør reduseres                                                         |                         |                                                                                                                         |             |         |                   |
| Informasjon                                                                                                                          |                         | [Type= diskret] [Format=numeric] [Rekkevidde= 1-7] [Missing=*]                                                          |             |         |                   |
| Statistikk [NW/ W]                                                                                                                   |                         | [Gyldige=4689 /-] [Ugyldig=0 /-]                                                                                        |             |         |                   |
| Tekst før spørsmål                                                                                                                   |                         | Generelt sett, i hvilken grad er du enig eller uenig i følgende påstander:                                              |             |         |                   |
| Spørsmålstekst                                                                                                                       |                         | Norges Høyesteretts makt til å avgjøre visse typer kontroversielle saker bør reduseres.                                 |             |         |                   |
| Instruksjoner til intervjueren                                                                                                       |                         | [Spurt hvis u=3. ]                                                                                                      |             |         |                   |
| Kommentarer                                                                                                                          |                         | Norges Høyesteretts makt til å avgjøre visse typer kontroversielle saker bør reduseres. (Generelt sett, i hvilken gra   |             |         |                   |
| Verdi                                                                                                                                | Merkelapp               | Enheter                                                                                                                 | Prosent     |         |                   |
| 1                                                                                                                                    | Svært enig              | 19                                                                                                                      | <div></div> | 0.4%    |                   |
| 2                                                                                                                                    | Enig                    | 87                                                                                                                      | <div></div> | 1.9%    |                   |
| 3                                                                                                                                    | Noe enig                | 138                                                                                                                     | <div></div> | 2.9%    |                   |
| 4                                                                                                                                    | Verken enig eller uenig | 351                                                                                                                     | <div></div> | 7.5%    |                   |
| 5                                                                                                                                    | Noe uenig               | 104                                                                                                                     | <div></div> | 2.2%    |                   |
| 6                                                                                                                                    | Uenig                   | 284                                                                                                                     | <div></div> | 6.1%    |                   |
| 7                                                                                                                                    | Svært uenig             | 77                                                                                                                      | <div></div> | 1.6%    |                   |
| 97                                                                                                                                   | Ikke svart              | 43                                                                                                                      | <div></div> | 0.9%    |                   |
| 98                                                                                                                                   | Ikke spurt              | 3586                                                                                                                    | <div></div> | 76.5%   |                   |
| Advarsel: disse tallene indikerer antall enheter (cases) i datafilen. De kan ikke tolkes som oppsummert statistikk for populasjonen. |                         |                                                                                                                         |             |         |                   |
| # r7pad9_3: Påstand: Høyesterett favoriserer enkelte grupper                                                                         |                         |                                                                                                                         |             |         |                   |
| Informasjon                                                                                                                          |                         | [Type= diskret] [Format=numeric] [Rekkevidde= 1-7] [Missing=*]                                                          |             |         |                   |
| Statistikk [NW/ W]                                                                                                                   |                         | [Gyldige=4689 /-] [Ugyldig=0 /-]                                                                                        |             |         |                   |
| Tekst før spørsmål                                                                                                                   |                         | Generelt sett, i hvilken grad er du enig eller uenig i følgende påstander:                                              |             |         |                   |
| Spørsmålstekst                                                                                                                       |                         | Avgjørelsene til Norges Høyesterett favoriserer enkelte grupper mer enn andre.                                          |             |         |                   |
| Instruksjoner til intervjueren                                                                                                       |                         | [Spurt hvis u=3. ]                                                                                                      |             |         |                   |
| Kommentarer                                                                                                                          |                         | Avgjørelsene til Norges Høyesterett favoriserer enkelte grupper mer enn andre. (Generelt sett, i hvilken grad er du eni |             |         |                   |
| Verdi                                                                                                                                | Merkelapp               | Enheter                                                                                                                 | Prosent     |         |                   |
| 1                                                                                                                                    | Svært enig              | 14                                                                                                                      | <div></div> | 0.3%    |                   |
| 2                                                                                                                                    | Enig                    | 42                                                                                                                      | <div></div> | 0.9%    |                   |
| 3                                                                                                                                    | Noe enig                | 142                                                                                                                     | <div></div> | 3.0%    |                   |
| 4                                                                                                                                    | Verken enig eller uenig | 450                                                                                                                     | <div></div> | 9.6%    |                   |
| 5                                                                                                                                    | Noe uenig               | 79                                                                                                                      | <div></div> | 1.7%    |                   |
| 6                                                                                                                                    | Uenig                   | 259                                                                                                                     | <div></div> | 5.5%    |                   |
| 7                                                                                                                                    | Svært uenig             | 79                                                                                                                      | <div></div> | 1.7%    |                   |
| 97                                                                                                                                   | Ikke svart              | 38                                                                                                                      | <div></div> | 0.8%    |                   |
| 98                                                                                                                                   | Ikke spurt              | 3586                                                                                                                    | <div></div> | 76.5%   |                   |
| Advarsel: disse tallene indikerer antall enheter (cases) i datafilen. De kan ikke tolkes som oppsummert statistikk for populasjonen. |                         |                                                                                                                         |             |         |                   |
| # r7pad9_4: Påstand: Domstolen kan avskaffes, dersom Høyesterett tar mange valg folk flest er uenige i                               |                         |                                                                                                                         |             |         |                   |
| Informasjon                                                                                                                          |                         | [Type= diskret] [Format=numeric] [Rekkevidde= 1-7] [Missing=*]                                                          |             |         |                   |
| Statistikk [NW/ W]                                                                                                                   |                         | [Gyldige=4689 /-] [Ugyldig=0 /-]                                                                                        |             |         |                   |

| # r7pad9_4: Påstand: Domstolen kan avskaffes, dersom Høyesterett tar mange valg folk flest er uenige i                               |                         |                                                                                                                                                                                                          |         |
|--------------------------------------------------------------------------------------------------------------------------------------|-------------------------|----------------------------------------------------------------------------------------------------------------------------------------------------------------------------------------------------------|---------|
| Tekst før spørsmål                                                                                                                   |                         | Generelt sett, i hvilken grad er du enig eller uenig i følgende påstander:                                                                                                                               |         |
| Spørsmålstekst                                                                                                                       |                         | Dersom Norges Høyesterett begynner å ta mange avgjørelser som folk flest er uenige i, kan det være like greit å avskaffe domstolen fullstendig.                                                          |         |
| Instruksjoner til intervjueren                                                                                                       |                         | [Spurt hvis u=3. ]                                                                                                                                                                                       |         |
| Kommentarer                                                                                                                          |                         | Dersom Norges Høyesterett begynner å ta mange avgjørelser som folk flest er uenige i, kan det være like greit å avsk                                                                                     |         |
| Verdi                                                                                                                                | Merkelapp               | Enheter                                                                                                                                                                                                  | Prosent |
| 1                                                                                                                                    | Svært enig              | 18                                                                                                                                                                                                       | 0.4%    |
| 2                                                                                                                                    | Enig                    | 39                                                                                                                                                                                                       | 0.8%    |
| 3                                                                                                                                    | Noe enig                | 112                                                                                                                                                                                                      | 2.4%    |
| 4                                                                                                                                    | Verken enig eller uenig | 213                                                                                                                                                                                                      | 4.5%    |
| 5                                                                                                                                    | Noe uenig               | 141                                                                                                                                                                                                      | 3.0%    |
| 6                                                                                                                                    | Uenig                   | 328                                                                                                                                                                                                      | 7.0%    |
| 7                                                                                                                                    | Svært uenig             | 214                                                                                                                                                                                                      | 4.6%    |
| 97                                                                                                                                   | Ikke svart              | 38                                                                                                                                                                                                       | 0.8%    |
| 98                                                                                                                                   | Ikke spurt              | 3586                                                                                                                                                                                                     | 76.5%   |
| Advarsel: disse tallene indikerer antall enheter (cases) i datafilen. De kan ikke tolkes som oppsummert statistikk for populasjonen. |                         |                                                                                                                                                                                                          |         |
| # r7ran31: [Randomiserer hvis u=3. ]                                                                                                 |                         |                                                                                                                                                                                                          |         |
| Informasjon                                                                                                                          |                         | [Type= diskret] [Format=numeric] [Rekkevidde= 1-6] [Missing=*]                                                                                                                                           |         |
| Statistikk [NW/ W]                                                                                                                   |                         | [Gyldige=1080 /-] [Ugyldig=3609 /-]                                                                                                                                                                      |         |
| Instruksjoner til intervjueren                                                                                                       |                         | [Randomiserer hvis u=3. ]                                                                                                                                                                                |         |
| Verdi                                                                                                                                | Merkelapp               | Enheter                                                                                                                                                                                                  | Prosent |
| 1                                                                                                                                    | 1                       | 177                                                                                                                                                                                                      | 16.4%   |
| 2                                                                                                                                    | 2                       | 173                                                                                                                                                                                                      | 16.0%   |
| 3                                                                                                                                    | 3                       | 184                                                                                                                                                                                                      | 17.0%   |
| 4                                                                                                                                    | 4                       | 187                                                                                                                                                                                                      | 17.3%   |
| 5                                                                                                                                    | 5                       | 214                                                                                                                                                                                                      | 19.8%   |
| 6                                                                                                                                    | 6                       | 145                                                                                                                                                                                                      | 13.4%   |
| Sysmiss                                                                                                                              |                         | 3609                                                                                                                                                                                                     |         |
| Advarsel: disse tallene indikerer antall enheter (cases) i datafilen. De kan ikke tolkes som oppsummert statistikk for populasjonen. |                         |                                                                                                                                                                                                          |         |
| # r7pad11a: Akseptabelt: Beslutning, innvandrerbarn til foreldre med ulovlig opphold få bli dersom foreldre sendt ut                 |                         |                                                                                                                                                                                                          |         |
| Informasjon                                                                                                                          |                         | [Type= diskret] [Format=numeric] [Rekkevidde= 1-5] [Missing=*]                                                                                                                                           |         |
| Statistikk [NW/ W]                                                                                                                   |                         | [Gyldige=4689 /-] [Ugyldig=0 /-]                                                                                                                                                                         |         |
| Tekst før spørsmål                                                                                                                   |                         | Det finnes flere innvandrerbarn som har foreldre som oppholder seg ulovlig i Norge. Se for deg at Høyesterett besluttet at disse barna skal ha krav på å få bli i Norge dersom foreldrene blir sendt ut. |         |
| Spørsmålstekst                                                                                                                       |                         | Generelt sett, i hvilken grad mener du dette ville ha vært en akseptabel avgjørelse fra Høyesterett?                                                                                                     |         |
| Instruksjoner til intervjueren                                                                                                       |                         | [Spurt hvis u=3 og ran31=1. ]                                                                                                                                                                            |         |
| Kommentarer                                                                                                                          |                         | Det finnes flere innvandrerbarn som har foreldre som oppholder seg ulovlig i Norge. Se for deg at Høyesterett besluttet                                                                                  |         |
| Verdi                                                                                                                                | Merkelapp               | Enheter                                                                                                                                                                                                  | Prosent |
| 1                                                                                                                                    | Svært akseptabelt       | 18                                                                                                                                                                                                       | 0.4%    |
| 2                                                                                                                                    | Akseptabelt             | 64                                                                                                                                                                                                       | 1.4%    |
| 3                                                                                                                                    | Noe akseptabelt         | 38                                                                                                                                                                                                       | 0.8%    |
| 4                                                                                                                                    | Lite akseptabelt        | 41                                                                                                                                                                                                       | 0.9%    |

| # r7pad11a: Akseptabelt: Beslutning, innvandrerbarn til foreldre med ulovlig opphold få bli dersom foreldre sendt ut                 |                                                                                                                                                                                                                                    |         |         |
|--------------------------------------------------------------------------------------------------------------------------------------|------------------------------------------------------------------------------------------------------------------------------------------------------------------------------------------------------------------------------------|---------|---------|
| Verdi                                                                                                                                | Merkelapp                                                                                                                                                                                                                          | Enheter | Prosent |
| 5                                                                                                                                    | Ikke akseptabelt i det hele tatt                                                                                                                                                                                                   | 14      | 0.3%    |
| 97                                                                                                                                   | Ikke svart                                                                                                                                                                                                                         | 2       | 0.0%    |
| 98                                                                                                                                   | Ikke spurt                                                                                                                                                                                                                         | 4512    | 96.2%   |
| Advarsel: disse tallene indikerer antall enheter (cases) i datafilen. De kan ikke tolkes som oppsummert statistikk for populasjonen. |                                                                                                                                                                                                                                    |         |         |
| # r7pad11b: Akseptabelt: Beslutning, innvandrerbarn til foreldre med ulovlig opphold ikke få bli dersom foreldre sendt ut            |                                                                                                                                                                                                                                    |         |         |
| Informasjon                                                                                                                          | [Type= diskret] [Format=numeric] [Rekkevidde= 1-5] [Missing=*]                                                                                                                                                                     |         |         |
| Statistikk [NW/ W]                                                                                                                   | [Gyldige=4689 /-] [Ugyldig=0 /-]                                                                                                                                                                                                   |         |         |
| Tekst før spørsmål                                                                                                                   | Det finnes flere innvandrerbarn som har foreldre som oppholder seg ulovlig i Norge. Se for deg at Høyesterett besluttet at disse barna ikke skal ha krav på å få bli i Norge dersom foreldrene blir sendt ut.                      |         |         |
| Spørsmålstekst                                                                                                                       | Generelt sett, i hvilken grad mener du dette ville ha vært en akseptabel avgjørelse fra Høyesterett?                                                                                                                               |         |         |
| Instruksjoner til intervjueren                                                                                                       | [Spurt hvis u=3 og ran31=2. ]                                                                                                                                                                                                      |         |         |
| Kommentarer                                                                                                                          | Det finnes flere innvandrerbarn som har foreldre som oppholder seg ulovlig i Norge. Se for deg at Høyesterett besluttet                                                                                                            |         |         |
| Verdi                                                                                                                                | Merkelapp                                                                                                                                                                                                                          | Enheter | Prosent |
| 1                                                                                                                                    | Svært akseptabelt                                                                                                                                                                                                                  | 20      | 0.4%    |
| 2                                                                                                                                    | Akseptabelt                                                                                                                                                                                                                        | 51      | 1.1%    |
| 3                                                                                                                                    | Noe akseptabelt                                                                                                                                                                                                                    | 39      | 0.8%    |
| 4                                                                                                                                    | Lite akseptabelt                                                                                                                                                                                                                   | 52      | 1.1%    |
| 5                                                                                                                                    | Ikke akseptabelt i det hele tatt                                                                                                                                                                                                   | 11      | 0.2%    |
| 97                                                                                                                                   | Ikke svart                                                                                                                                                                                                                         | 0       |         |
| 98                                                                                                                                   | Ikke spurt                                                                                                                                                                                                                         | 4516    | 96.3%   |
| Advarsel: disse tallene indikerer antall enheter (cases) i datafilen. De kan ikke tolkes som oppsummert statistikk for populasjonen. |                                                                                                                                                                                                                                    |         |         |
| # r7pad11c: Akseptabelt: Enstemmig, innvandrerbarn til foreldre med ulovlig opphold få bli dersom foreldre sendt ut                  |                                                                                                                                                                                                                                    |         |         |
| Informasjon                                                                                                                          | [Type= diskret] [Format=numeric] [Rekkevidde= 1-5] [Missing=*]                                                                                                                                                                     |         |         |
| Statistikk [NW/ W]                                                                                                                   | [Gyldige=4689 /-] [Ugyldig=0 /-]                                                                                                                                                                                                   |         |         |
| Tekst før spørsmål                                                                                                                   | Det finnes flere innvandrerbarn som har foreldre som oppholder seg ulovlig i Norge. Se for deg at Høyesterett i en enstemmig avgjørelse besluttet at disse barna skal ha krav på å få bli i Norge dersom foreldrene blir sendt ut. |         |         |
| Spørsmålstekst                                                                                                                       | Generelt sett, i hvilken grad mener du dette ville ha vært en akseptabel avgjørelse fra Høyesterett?                                                                                                                               |         |         |
| Instruksjoner til intervjueren                                                                                                       | [Spurt hvis u=3 og ran31=3. ]                                                                                                                                                                                                      |         |         |
| Kommentarer                                                                                                                          | Det finnes flere innvandrerbarn som har foreldre som oppholder seg ulovlig i Norge. Se for deg at Høyesterett i en enste                                                                                                           |         |         |
| Verdi                                                                                                                                | Merkelapp                                                                                                                                                                                                                          | Enheter | Prosent |
| 1                                                                                                                                    | Svært akseptabelt                                                                                                                                                                                                                  | 33      | 0.7%    |
| 2                                                                                                                                    | Akseptabelt                                                                                                                                                                                                                        | 68      | 1.5%    |
| 3                                                                                                                                    | Noe akseptabelt                                                                                                                                                                                                                    | 27      | 0.6%    |
| 4                                                                                                                                    | Lite akseptabelt                                                                                                                                                                                                                   | 36      | 0.8%    |
| 5                                                                                                                                    | Ikke akseptabelt i det hele tatt                                                                                                                                                                                                   | 15      | 0.3%    |
| 97                                                                                                                                   | Ikke svart                                                                                                                                                                                                                         | 5       | 0.1%    |
| 98                                                                                                                                   | Ikke spurt                                                                                                                                                                                                                         | 4505    | 96.1%   |
| Advarsel: disse tallene indikerer antall enheter (cases) i datafilen. De kan ikke tolkes som oppsummert statistikk for populasjonen. |                                                                                                                                                                                                                                    |         |         |
| # r7pad11d: Akseptabelt: Enstemmig, innvandrerbarn til foreldre med ulovlig opphold ikke få bli dersom foreldre sendt ut             |                                                                                                                                                                                                                                    |         |         |
| Informasjon                                                                                                                          | [Type= diskret] [Format=numeric] [Rekkevidde= 1-5] [Missing=*]                                                                                                                                                                     |         |         |

| # r7pad11d: Akseptabelt: Enstemmig, innvandrerbarn til foreldre med ulovlig opphold ikke få bli dersom foreldre sendt ut             |                                                                                                                                                                                                                                                           |         |         |
|--------------------------------------------------------------------------------------------------------------------------------------|-----------------------------------------------------------------------------------------------------------------------------------------------------------------------------------------------------------------------------------------------------------|---------|---------|
| Statistikk [NW/ W]                                                                                                                   | [Gyldige=4689 /-] [Ugyldig=0 /-]                                                                                                                                                                                                                          |         |         |
| Tekst før spørsmål                                                                                                                   | Det finnes flere innvandrerbarn som har foreldre som oppholder seg ulovlig i Norge. Se for deg at Høyesterett i en enstemmig avgjørelse besluttet at disse barna ikke skal ha krav på å få bli i Norge dersom foreldrene blir sendt ut.                   |         |         |
| Spørsmålstekst                                                                                                                       | Generelt sett, i hvilken grad mener du dette ville ha vært en akseptabel avgjørelse fra Høyesterett?                                                                                                                                                      |         |         |
| Instruksjoner til intervjueren                                                                                                       | [Spurt hvis u=3 og ran31=4. ]                                                                                                                                                                                                                             |         |         |
| Kommentarer                                                                                                                          | Det finnes flere innvandrerbarn som har foreldre som oppholder seg ulovlig i Norge. Se for deg at Høyesterett i en enste                                                                                                                                  |         |         |
| Verdi                                                                                                                                | Merkelapp                                                                                                                                                                                                                                                 | Enheter | Prosent |
| 1                                                                                                                                    | Svært akseptabelt                                                                                                                                                                                                                                         | 22      | 0.5%    |
| 2                                                                                                                                    | Akseptabelt                                                                                                                                                                                                                                               | 57      | 1.2%    |
| 3                                                                                                                                    | Noe akseptabelt                                                                                                                                                                                                                                           | 36      | 0.8%    |
| 4                                                                                                                                    | Lite akseptabelt                                                                                                                                                                                                                                          | 50      | 1.1%    |
| 5                                                                                                                                    | Ikke akseptabelt i det hele tatt                                                                                                                                                                                                                          | 19      | 0.4%    |
| 97                                                                                                                                   | Ikke svart                                                                                                                                                                                                                                                | 3       | 0.1%    |
| 98                                                                                                                                   | Ikke spurt                                                                                                                                                                                                                                                | 4502    | 96.0%   |
| Advarsel: disse tallene indikerer antall enheter (cases) i datafilen. De kan ikke tolkes som oppsummert statistikk for populasjonen. |                                                                                                                                                                                                                                                           |         |         |
| # r7pad11e: Akseptabelt: Knappt flertall, innvandrerbarn til foreldre med ulovlig opphold få bli dersom foreldre sendt ut            |                                                                                                                                                                                                                                                           |         |         |
| Informasjon                                                                                                                          | [Type= diskret] [Format=numeric] [Rekkevidde= 1-5] [Missing=*]                                                                                                                                                                                            |         |         |
| Statistikk [NW/ W]                                                                                                                   | [Gyldige=4689 /-] [Ugyldig=0 /-]                                                                                                                                                                                                                          |         |         |
| Tekst før spørsmål                                                                                                                   | Det finnes flere innvandrerbarn som har foreldre som oppholder seg ulovlig i Norge. Se for deg at Høyesterett ved et knapt flertall på tre mot to dommere besluttet at disse barna skal ha krav på å få bli i Norge dersom foreldrene blir sendt ut.      |         |         |
| Spørsmålstekst                                                                                                                       | Generelt sett, i hvilken grad mener du dette ville ha vært en akseptabel avgjørelse fra Høyesterett?                                                                                                                                                      |         |         |
| Instruksjoner til intervjueren                                                                                                       | [Spurt hvis u=3 og ran31=5. ]                                                                                                                                                                                                                             |         |         |
| Kommentarer                                                                                                                          | Det finnes flere innvandrerbarn som har foreldre som oppholder seg ulovlig i Norge. Se for deg at Høyesterett ved et kna                                                                                                                                  |         |         |
| Verdi                                                                                                                                | Merkelapp                                                                                                                                                                                                                                                 | Enheter | Prosent |
| 1                                                                                                                                    | Svært akseptabelt                                                                                                                                                                                                                                         | 25      | 0.5%    |
| 2                                                                                                                                    | Akseptabelt                                                                                                                                                                                                                                               | 98      | 2.1%    |
| 3                                                                                                                                    | Noe akseptabelt                                                                                                                                                                                                                                           | 42      | 0.9%    |
| 4                                                                                                                                    | Lite akseptabelt                                                                                                                                                                                                                                          | 27      | 0.6%    |
| 5                                                                                                                                    | Ikke akseptabelt i det hele tatt                                                                                                                                                                                                                          | 17      | 0.4%    |
| 97                                                                                                                                   | Ikke svart                                                                                                                                                                                                                                                | 5       | 0.1%    |
| 98                                                                                                                                   | Ikke spurt                                                                                                                                                                                                                                                | 4475    | 95.4%   |
| Advarsel: disse tallene indikerer antall enheter (cases) i datafilen. De kan ikke tolkes som oppsummert statistikk for populasjonen. |                                                                                                                                                                                                                                                           |         |         |
| # r7pad11f: Akseptabelt: Knappt flertall, innvandrerbarn til foreldre med ulovlig opphold ikke få bli dersom foreldre sendt ut       |                                                                                                                                                                                                                                                           |         |         |
| Informasjon                                                                                                                          | [Type= diskret] [Format=numeric] [Rekkevidde= 1-5] [Missing=*]                                                                                                                                                                                            |         |         |
| Statistikk [NW/ W]                                                                                                                   | [Gyldige=4689 /-] [Ugyldig=0 /-]                                                                                                                                                                                                                          |         |         |
| Tekst før spørsmål                                                                                                                   | Det finnes flere innvandrerbarn som har foreldre som oppholder seg ulovlig i Norge. Se for deg at Høyesterett ved et knapt flertall på tre mot to dommere besluttet at disse barna ikke skal ha krav på å få bli i Norge dersom foreldrene blir sendt ut. |         |         |
| Spørsmålstekst                                                                                                                       | Generelt sett, i hvilken grad mener du dette ville ha vært en akseptabel avgjørelse fra Høyesterett?                                                                                                                                                      |         |         |
| Instruksjoner til intervjueren                                                                                                       | [Spurt hvis u=3 og ran31=6. ]                                                                                                                                                                                                                             |         |         |

# # r7pad11f: Akseptabelt: Knappt flertall, innvandrerbarn til foreldre med ulovlig opphold ikke få bli dersom foreldre sendt ut

|                    |                                                                                                                          |
|--------------------|--------------------------------------------------------------------------------------------------------------------------|
| <b>Kommentarer</b> | Det finnes flere innvandrerbarn som har foreldre som oppholder seg ulovlig i Norge. Se for deg at Høyesterett ved et kna |
|--------------------|--------------------------------------------------------------------------------------------------------------------------|

| Verdi | Merkelapp                        | Enheter | Prosent |
|-------|----------------------------------|---------|---------|
| 1     | Svært akseptabelt                | 17      | 0.4%    |
| 2     | Akseptabelt                      | 49      | 1.0%    |
| 3     | Noe akseptabelt                  | 34      | 0.7%    |
| 4     | Lite akseptabelt                 | 36      | 0.8%    |
| 5     | Ikke akseptabelt i det hele tatt | 5       | 0.1%    |
| 97    | Ikke svart                       | 4       | 0.1%    |
| 98    | Ikke spurt                       | 4544    | 96.9%   |

Advarsel: disse tallene indikerer antall enheter (cases) i datafilen. De kan ikke tolkes som oppsummert statistikk for populasjonen.

## # r7ran32: [Randomiserer hvis u=3. ]

|                                       |                                                                |
|---------------------------------------|----------------------------------------------------------------|
| <b>Informasjon</b>                    | [Type= diskret] [Format=numeric] [Rekkevidde= 1-6] [Missing=*] |
| <b>Statistikk [NW/ W]</b>             | [Gyldige=1080 /-] [Ugyldig=3609 /-]                            |
| <b>Instruksjoner til intervjueren</b> | [Randomiserer hvis u=3. ]                                      |

| Verdi   | Merkelapp | Enheter | Prosent |
|---------|-----------|---------|---------|
| 1       | 1         | 201     | 18.6%   |
| 2       | 2         | 164     | 15.2%   |
| 3       | 3         | 181     | 16.8%   |
| 4       | 4         | 186     | 17.2%   |
| 5       | 5         | 171     | 15.8%   |
| 6       | 6         | 177     | 16.4%   |
| Sysmiss |           | 3609    |         |

Advarsel: disse tallene indikerer antall enheter (cases) i datafilen. De kan ikke tolkes som oppsummert statistikk for populasjonen.

## # r7pad12a: Akseptabelt: Beslutning, arbeidsgiver lov til å lese meldinger på telefon utstedt av selskapet

|                                       |                                                                                                                                                                                                                                                      |
|---------------------------------------|------------------------------------------------------------------------------------------------------------------------------------------------------------------------------------------------------------------------------------------------------|
| <b>Informasjon</b>                    | [Type= diskret] [Format=numeric] [Rekkevidde= 1-5] [Missing=*]                                                                                                                                                                                       |
| <b>Statistikk [NW/ W]</b>             | [Gyldige=4689 /-] [Ugyldig=0 /-]                                                                                                                                                                                                                     |
| <b>Tekst før spørsmål</b>             | Flere arbeidsgivere gir sine ansatte mobiltelefon som skal brukes til arbeid. Se for deg at Høyesterett besluttet at arbeidsgivere skal ha lov til å lese alle tekstmeldinger og e-poster på telefoner som de ansatte har fått utstedt av selskapet. |
| <b>Spørsmålstekst</b>                 | Generelt sett, i hvilken grad mener du dette ville ha vært en akseptabel avgjørelse fra Høyesterett?                                                                                                                                                 |
| <b>Instruksjoner til intervjueren</b> | [Spurt hvis u=3 og ran32=1. ]                                                                                                                                                                                                                        |
| <b>Kommentarer</b>                    | Flere arbeidsgivere gir sine ansatte mobiltelefon som skal brukes til arbeid. Se for deg at Høyesterett besluttet at arb                                                                                                                             |

| Verdi | Merkelapp                        | Enheter | Prosent |
|-------|----------------------------------|---------|---------|
| 1     | Svært akseptabelt                | 10      | 0.2%    |
| 2     | Akseptabelt                      | 42      | 0.9%    |
| 3     | Noe akseptabelt                  | 33      | 0.7%    |
| 4     | Lite akseptabelt                 | 58      | 1.2%    |
| 5     | Ikke akseptabelt i det hele tatt | 53      | 1.1%    |
| 97    | Ikke svart                       | 5       | 0.1%    |
| 98    | Ikke spurt                       | 4488    | 95.7%   |

Advarsel: disse tallene indikerer antall enheter (cases) i datafilen. De kan ikke tolkes som oppsummert statistikk for populasjonen.



| # r7pad12b: Akseptabelt: Beslutning, arbeidsgiver ikke lov til å lese meldinger på telefon utstedt av selskapet                      |                                                                                                                                                                                                                                                                                     |         |         |
|--------------------------------------------------------------------------------------------------------------------------------------|-------------------------------------------------------------------------------------------------------------------------------------------------------------------------------------------------------------------------------------------------------------------------------------|---------|---------|
| Informasjon                                                                                                                          | [Type= diskret] [Format=numeric] [Rekkevidde= 1-5] [Missing=*]                                                                                                                                                                                                                      |         |         |
| Statistikk [NW/ W]                                                                                                                   | [Gyldige=4689 /-] [Ugyldig=0 /-]                                                                                                                                                                                                                                                    |         |         |
| Tekst før spørsmål                                                                                                                   | Flere arbeidsgivere gir sine ansatte mobiltelefon som skal brukes til arbeid. Se for deg at Høyesterett besluttet at arbeidsgivere ikke skal ha lov til å lese alle tekstmeldinger og e-poster på telefoner som de ansatte har fått utstedt av selskapet.                           |         |         |
| Spørsmålstekst                                                                                                                       | Generelt sett, i hvilken grad mener du dette ville ha vært en akseptabel avgjørelse fra Høyesterett?                                                                                                                                                                                |         |         |
| Instruksjoner til intervjueren                                                                                                       | [Spurt hvis u=3 og ran32=2. ]                                                                                                                                                                                                                                                       |         |         |
| Kommentarer                                                                                                                          | Flere arbeidsgivere gir sine ansatte mobiltelefon som skal brukes til arbeid. Se for deg at Høyesterett besluttet at arb                                                                                                                                                            |         |         |
| Verdi                                                                                                                                | Merkelapp                                                                                                                                                                                                                                                                           | Enheter | Prosent |
| 1                                                                                                                                    | Svært akseptabelt                                                                                                                                                                                                                                                                   | 51      | 1.1%    |
| 2                                                                                                                                    | Akseptabelt                                                                                                                                                                                                                                                                         | 67      | 1.4%    |
| 3                                                                                                                                    | Noe akseptabelt                                                                                                                                                                                                                                                                     | 13      | 0.3%    |
| 4                                                                                                                                    | Lite akseptabelt                                                                                                                                                                                                                                                                    | 17      | 0.4%    |
| 5                                                                                                                                    | Ikke akseptabelt i det hele tatt                                                                                                                                                                                                                                                    | 10      | 0.2%    |
| 97                                                                                                                                   | Ikke svart                                                                                                                                                                                                                                                                          | 6       | 0.1%    |
| 98                                                                                                                                   | Ikke spurt                                                                                                                                                                                                                                                                          | 4525    | 96.5%   |
| Advarsel: disse tallene indikerer antall enheter (cases) i datafilen. De kan ikke tolkes som oppsummert statistikk for populasjonen. |                                                                                                                                                                                                                                                                                     |         |         |
| # r7pad12c: Akseptabelt: Enstemmig, arbeidsgiver lov til å lese meldinger på telefon utstedt av selskapet                            |                                                                                                                                                                                                                                                                                     |         |         |
| Informasjon                                                                                                                          | [Type= diskret] [Format=numeric] [Rekkevidde= 1-5] [Missing=*]                                                                                                                                                                                                                      |         |         |
| Statistikk [NW/ W]                                                                                                                   | [Gyldige=4689 /-] [Ugyldig=0 /-]                                                                                                                                                                                                                                                    |         |         |
| Tekst før spørsmål                                                                                                                   | Flere arbeidsgivere gir sine ansatte mobiltelefon som skal brukes til arbeid. Se for deg at Høyesterett i en enstemmig avgjørelse besluttet at arbeidsgivere skal ha lov til å lese alle tekstmeldinger og e-poster på telefoner som de ansatte har fått utstedt av selskapet.      |         |         |
| Spørsmålstekst                                                                                                                       | Generelt sett, i hvilken grad mener du dette ville ha vært en akseptabel avgjørelse fra Høyesterett?                                                                                                                                                                                |         |         |
| Instruksjoner til intervjueren                                                                                                       | [Spurt hvis u=3 og ran32=3. ]                                                                                                                                                                                                                                                       |         |         |
| Kommentarer                                                                                                                          | Flere arbeidsgivere gir sine ansatte mobiltelefon som skal brukes til arbeid. Se for deg at Høyesterett i en enstemmig a                                                                                                                                                            |         |         |
| Verdi                                                                                                                                | Merkelapp                                                                                                                                                                                                                                                                           | Enheter | Prosent |
| 1                                                                                                                                    | Svært akseptabelt                                                                                                                                                                                                                                                                   | 6       | 0.1%    |
| 2                                                                                                                                    | Akseptabelt                                                                                                                                                                                                                                                                         | 40      | 0.9%    |
| 3                                                                                                                                    | Noe akseptabelt                                                                                                                                                                                                                                                                     | 23      | 0.5%    |
| 4                                                                                                                                    | Lite akseptabelt                                                                                                                                                                                                                                                                    | 58      | 1.2%    |
| 5                                                                                                                                    | Ikke akseptabelt i det hele tatt                                                                                                                                                                                                                                                    | 47      | 1.0%    |
| 97                                                                                                                                   | Ikke svart                                                                                                                                                                                                                                                                          | 7       | 0.1%    |
| 98                                                                                                                                   | Ikke spurt                                                                                                                                                                                                                                                                          | 4508    | 96.1%   |
| Advarsel: disse tallene indikerer antall enheter (cases) i datafilen. De kan ikke tolkes som oppsummert statistikk for populasjonen. |                                                                                                                                                                                                                                                                                     |         |         |
| # r7pad12d: Akseptabelt: Enstemmig, arbeidsgiver ikke lov til å lese meldinger på telefon utstedt av selskapet                       |                                                                                                                                                                                                                                                                                     |         |         |
| Informasjon                                                                                                                          | [Type= diskret] [Format=numeric] [Rekkevidde= 1-5] [Missing=*]                                                                                                                                                                                                                      |         |         |
| Statistikk [NW/ W]                                                                                                                   | [Gyldige=4689 /-] [Ugyldig=0 /-]                                                                                                                                                                                                                                                    |         |         |
| Tekst før spørsmål                                                                                                                   | Flere arbeidsgivere gir sine ansatte mobiltelefon som skal brukes til arbeid. Se for deg at Høyesterett i en enstemmig avgjørelse besluttet at arbeidsgivere ikke skal ha lov til å lese alle tekstmeldinger og e-poster på telefoner som de ansatte har fått utstedt av selskapet. |         |         |
| Spørsmålstekst                                                                                                                       | Generelt sett, i hvilken grad mener du dette ville ha vært en akseptabel avgjørelse fra Høyesterett?                                                                                                                                                                                |         |         |
| Instruksjoner til intervjueren                                                                                                       | [Spurt hvis u=3 og ran32=4. ]                                                                                                                                                                                                                                                       |         |         |

| # r7pad12d: Akseptabelt: Enstemmig, arbeidsgiver ikke lov til å lese meldinger på telefon utstedt av selskapet                       |                                  |                                                                                                                                                                                                                                                                                                       |             |       |
|--------------------------------------------------------------------------------------------------------------------------------------|----------------------------------|-------------------------------------------------------------------------------------------------------------------------------------------------------------------------------------------------------------------------------------------------------------------------------------------------------|-------------|-------|
| Kommentarer                                                                                                                          |                                  | Flere arbeidsgivere gir sine ansatte mobiltelefon som skal brukes til arbeid. Se for deg at Høyesterett i en enstemmig a                                                                                                                                                                              |             |       |
| Verdi                                                                                                                                | Merkelapp                        | Enheter                                                                                                                                                                                                                                                                                               | Prosent     |       |
| 1                                                                                                                                    | Svært akseptabelt                | 66                                                                                                                                                                                                                                                                                                    | <div></div> | 1.4%  |
| 2                                                                                                                                    | Akseptabelt                      | 70                                                                                                                                                                                                                                                                                                    | <div></div> | 1.5%  |
| 3                                                                                                                                    | Noe akseptabelt                  | 15                                                                                                                                                                                                                                                                                                    | <div></div> | 0.3%  |
| 4                                                                                                                                    | Lite akseptabelt                 | 19                                                                                                                                                                                                                                                                                                    | <div></div> | 0.4%  |
| 5                                                                                                                                    | Ikke akseptabelt i det hele tatt | 12                                                                                                                                                                                                                                                                                                    | <div></div> | 0.3%  |
| 97                                                                                                                                   | Ikke svart                       | 4                                                                                                                                                                                                                                                                                                     | <div></div> | 0.1%  |
| 98                                                                                                                                   | Ikke spurt                       | 4503                                                                                                                                                                                                                                                                                                  | <div></div> | 96.0% |
| Advarsel: disse tallene indikerer antall enheter (cases) i datafilen. De kan ikke tolkes som oppsummert statistikk for populasjonen. |                                  |                                                                                                                                                                                                                                                                                                       |             |       |
| # r7pad12e: Akseptabelt: Knappt flertall, arbeidsgiver lov til å lese meldinger på telefon utstedt av selskapet                      |                                  |                                                                                                                                                                                                                                                                                                       |             |       |
| Informasjon                                                                                                                          |                                  | [Type= diskret] [Format=numeric] [Rekkevidde= 1-5] [Missing=*]                                                                                                                                                                                                                                        |             |       |
| Statistikk [NW/ W]                                                                                                                   |                                  | [Gyldige=4689 /-] [Ugyldig=0 /-]                                                                                                                                                                                                                                                                      |             |       |
| Tekst før spørsmål                                                                                                                   |                                  | Flere arbeidsgivere gir sine ansatte mobiltelefon som skal brukes til arbeid. Se for deg Høyesterett ved et knapt flertall på tre mot to dommere besluttet at arbeidsgivere skal ha lov til å lese alle tekstmeldinger og e-poster på telefoner som de ansatte har fått utstedt av selskapet.         |             |       |
| Spørsmålstekst                                                                                                                       |                                  | Generelt sett, i hvilken grad mener du dette ville ha vært en akseptabel avgjørelse fra Høyesterett?                                                                                                                                                                                                  |             |       |
| Instruksjoner til intervjueren                                                                                                       |                                  | [Spurt hvis u=3 og ran32=5. ]                                                                                                                                                                                                                                                                         |             |       |
| Kommentarer                                                                                                                          |                                  | Flere arbeidsgivere gir sine ansatte mobiltelefon som skal brukes til arbeid. Se for deg Høyesterett ved et knapt flerta                                                                                                                                                                              |             |       |
| Verdi                                                                                                                                | Merkelapp                        | Enheter                                                                                                                                                                                                                                                                                               | Prosent     |       |
| 1                                                                                                                                    | Svært akseptabelt                | 7                                                                                                                                                                                                                                                                                                     | <div></div> | 0.1%  |
| 2                                                                                                                                    | Akseptabelt                      | 40                                                                                                                                                                                                                                                                                                    | <div></div> | 0.9%  |
| 3                                                                                                                                    | Noe akseptabelt                  | 33                                                                                                                                                                                                                                                                                                    | <div></div> | 0.7%  |
| 4                                                                                                                                    | Lite akseptabelt                 | 42                                                                                                                                                                                                                                                                                                    | <div></div> | 0.9%  |
| 5                                                                                                                                    | Ikke akseptabelt i det hele tatt | 45                                                                                                                                                                                                                                                                                                    | <div></div> | 1.0%  |
| 97                                                                                                                                   | Ikke svart                       | 4                                                                                                                                                                                                                                                                                                     | <div></div> | 0.1%  |
| 98                                                                                                                                   | Ikke spurt                       | 4518                                                                                                                                                                                                                                                                                                  | <div></div> | 96.4% |
| Advarsel: disse tallene indikerer antall enheter (cases) i datafilen. De kan ikke tolkes som oppsummert statistikk for populasjonen. |                                  |                                                                                                                                                                                                                                                                                                       |             |       |
| # r7pad12f: Akseptabelt: Knappt flertall, arbeidsgiver ikke lov til å lese meldinger på telefon utstedt av selskapet                 |                                  |                                                                                                                                                                                                                                                                                                       |             |       |
| Informasjon                                                                                                                          |                                  | [Type= diskret] [Format=numeric] [Rekkevidde= 1-5] [Missing=*]                                                                                                                                                                                                                                        |             |       |
| Statistikk [NW/ W]                                                                                                                   |                                  | [Gyldige=4689 /-] [Ugyldig=0 /-]                                                                                                                                                                                                                                                                      |             |       |
| Tekst før spørsmål                                                                                                                   |                                  | Flere arbeidsgivere gir sine ansatte mobiltelefon som skal brukes til arbeid. Se for deg at Høyesterett ved et knapt flertall på tre mot to dommere besluttet at arbeidsgivere ikke skal ha lov til å lese alle tekstmeldinger og e-poster på telefoner som de ansatte har fått utstedt av selskapet. |             |       |
| Spørsmålstekst                                                                                                                       |                                  | Generelt sett, i hvilken grad mener du dette ville ha vært en akseptabel avgjørelse fra Høyesterett?                                                                                                                                                                                                  |             |       |
| Instruksjoner til intervjueren                                                                                                       |                                  | [Spurt hvis u=3 og ran32=6. ]                                                                                                                                                                                                                                                                         |             |       |
| Kommentarer                                                                                                                          |                                  | Flere arbeidsgivere gir sine ansatte mobiltelefon som skal brukes til arbeid. Se for deg at Høyesterett ved et knapt fle                                                                                                                                                                              |             |       |
| Verdi                                                                                                                                | Merkelapp                        | Enheter                                                                                                                                                                                                                                                                                               | Prosent     |       |
| 1                                                                                                                                    | Svært akseptabelt                | 57                                                                                                                                                                                                                                                                                                    | <div></div> | 1.2%  |
| 2                                                                                                                                    | Akseptabelt                      | 72                                                                                                                                                                                                                                                                                                    | <div></div> | 1.5%  |
| 3                                                                                                                                    | Noe akseptabelt                  | 15                                                                                                                                                                                                                                                                                                    | <div></div> | 0.3%  |
| 4                                                                                                                                    | Lite akseptabelt                 | 14                                                                                                                                                                                                                                                                                                    | <div></div> | 0.3%  |
| 5                                                                                                                                    | Ikke akseptabelt i det hele tatt | 12                                                                                                                                                                                                                                                                                                    | <div></div> | 0.3%  |

| # r7pad12f: Akseptabelt: Knappt flertall, arbeidsgiver ikke lov til å lese meldinger på telefon utstedt av selskapet                 |                                                                                                                                                                                                                                                                                   |         |                   |
|--------------------------------------------------------------------------------------------------------------------------------------|-----------------------------------------------------------------------------------------------------------------------------------------------------------------------------------------------------------------------------------------------------------------------------------|---------|-------------------|
| Verdi                                                                                                                                | Merkelapp                                                                                                                                                                                                                                                                         | Enheter | Prosent           |
| 97                                                                                                                                   | Ikke svart                                                                                                                                                                                                                                                                        | 7       | 0.1%              |
| 98                                                                                                                                   | Ikke spurt                                                                                                                                                                                                                                                                        | 4512    | <div></div> 96.2% |
| Advarsel: disse tallene indikerer antall enheter (cases) i datafilen. De kan ikke tolkes som oppsummert statistikk for populasjonen. |                                                                                                                                                                                                                                                                                   |         |                   |
| # r7ran33: [Randomiserer hvis u=3. ]                                                                                                 |                                                                                                                                                                                                                                                                                   |         |                   |
| Informasjon                                                                                                                          | [Type= diskret] [Format=numeric] [Rekkevidde= 1-6] [Missing=*]                                                                                                                                                                                                                    |         |                   |
| Statistikk [NW/ W]                                                                                                                   | [Gyldige=1080 /-] [Ugyldig=3609 /-]                                                                                                                                                                                                                                               |         |                   |
| Instruksjoner til intervjueren                                                                                                       | [Randomiserer hvis u=3. ]                                                                                                                                                                                                                                                         |         |                   |
| Verdi                                                                                                                                | Merkelapp                                                                                                                                                                                                                                                                         | Enheter | Prosent           |
| 1                                                                                                                                    | 1                                                                                                                                                                                                                                                                                 | 189     | <div></div> 17.5% |
| 2                                                                                                                                    | 2                                                                                                                                                                                                                                                                                 | 177     | <div></div> 16.4% |
| 3                                                                                                                                    | 3                                                                                                                                                                                                                                                                                 | 156     | <div></div> 14.4% |
| 4                                                                                                                                    | 4                                                                                                                                                                                                                                                                                 | 163     | <div></div> 15.1% |
| 5                                                                                                                                    | 5                                                                                                                                                                                                                                                                                 | 194     | <div></div> 18.0% |
| 6                                                                                                                                    | 6                                                                                                                                                                                                                                                                                 | 201     | <div></div> 18.6% |
| Sysmiss                                                                                                                              |                                                                                                                                                                                                                                                                                   | 3609    |                   |
| Advarsel: disse tallene indikerer antall enheter (cases) i datafilen. De kan ikke tolkes som oppsummert statistikk for populasjonen. |                                                                                                                                                                                                                                                                                   |         |                   |
| # r7pad13a: Akseptabelt: Beslutning, nabokonflikter kan gå til domstol før mekling                                                   |                                                                                                                                                                                                                                                                                   |         |                   |
| Informasjon                                                                                                                          | [Type= diskret] [Format=numeric] [Rekkevidde= 1-5] [Missing=*]                                                                                                                                                                                                                    |         |                   |
| Statistikk [NW/ W]                                                                                                                   | [Gyldige=4689 /-] [Ugyldig=0 /-]                                                                                                                                                                                                                                                  |         |                   |
| Tekst før spørsmål                                                                                                                   | Hvert år oppstår det tusenvis av nabokonflikter i Norge. Se for deg at Høyesterett besluttet at personer som er involvert i nabokonflikter (for eksempel om høyde på trær og gjerder) skal ha lov til å gå direkte til søksmål i domstolene uten først å ha forsøkt mekling.      |         |                   |
| Spørsmålstekst                                                                                                                       | Generelt sett, i hvilken grad mener du dette ville ha vært en akseptabel avgjørelse fra Høyesterett?                                                                                                                                                                              |         |                   |
| Instruksjoner til intervjueren                                                                                                       | [Spurt hvis u=3 og ran33=1. ]                                                                                                                                                                                                                                                     |         |                   |
| Kommentarer                                                                                                                          | Hvert år oppstår det tusenvis av nabokonflikter i Norge. Se for deg at Høyesterett besluttet at personer som er involv                                                                                                                                                            |         |                   |
| Verdi                                                                                                                                | Merkelapp                                                                                                                                                                                                                                                                         | Enheter | Prosent           |
| 1                                                                                                                                    | Svært akseptabelt                                                                                                                                                                                                                                                                 | 4       | 0.1%              |
| 2                                                                                                                                    | Akseptabelt                                                                                                                                                                                                                                                                       | 16      | 0.3%              |
| 3                                                                                                                                    | Noe akseptabelt                                                                                                                                                                                                                                                                   | 19      | 0.4%              |
| 4                                                                                                                                    | Lite akseptabelt                                                                                                                                                                                                                                                                  | 80      | 1.7%              |
| 5                                                                                                                                    | Ikke akseptabelt i det hele tatt                                                                                                                                                                                                                                                  | 64      | 1.4%              |
| 97                                                                                                                                   | Ikke svart                                                                                                                                                                                                                                                                        | 6       | 0.1%              |
| 98                                                                                                                                   | Ikke spurt                                                                                                                                                                                                                                                                        | 4500    | <div></div> 96.0% |
| Advarsel: disse tallene indikerer antall enheter (cases) i datafilen. De kan ikke tolkes som oppsummert statistikk for populasjonen. |                                                                                                                                                                                                                                                                                   |         |                   |
| # r7pad13b: Akseptabelt: Beslutning, nabokonflikter kan ikke gå til domstol før mekling                                              |                                                                                                                                                                                                                                                                                   |         |                   |
| Informasjon                                                                                                                          | [Type= diskret] [Format=numeric] [Rekkevidde= 1-5] [Missing=*]                                                                                                                                                                                                                    |         |                   |
| Statistikk [NW/ W]                                                                                                                   | [Gyldige=4689 /-] [Ugyldig=0 /-]                                                                                                                                                                                                                                                  |         |                   |
| Tekst før spørsmål                                                                                                                   | Hvert år oppstår det tusenvis av nabokonflikter i Norge. Se for deg at Høyesterett besluttet at personer som er involvert i nabokonflikter (for eksempel om høyde på trær og gjerder) ikke skal ha lov til å gå direkte til søksmål i domstolene uten først å ha forsøkt mekling. |         |                   |
| Spørsmålstekst                                                                                                                       | Generelt sett, i hvilken grad mener du dette ville ha vært en akseptabel avgjørelse fra Høyesterett?                                                                                                                                                                              |         |                   |

| # r7pad13b: Akseptabelt: Beslutning, nabokonflikter kan ikke gå til domstol før mekling                                              |                                                                                                                                                                                                                                                                                                             |         |                              |
|--------------------------------------------------------------------------------------------------------------------------------------|-------------------------------------------------------------------------------------------------------------------------------------------------------------------------------------------------------------------------------------------------------------------------------------------------------------|---------|------------------------------|
| Instruksjoner til intervjueren                                                                                                       | [Spurt hvis u=3 og ran33=2. ]                                                                                                                                                                                                                                                                               |         |                              |
| Kommentarer                                                                                                                          | Hvert år oppstår det tusenvis av nabokonflikter i Norge. Se for deg at Høyesterett besluttet at personer som er involv                                                                                                                                                                                      |         |                              |
| Verdi                                                                                                                                | Merkelapp                                                                                                                                                                                                                                                                                                   | Enheter | Prosent                      |
| 1                                                                                                                                    | Svært akseptabelt                                                                                                                                                                                                                                                                                           | 69      | <div><div></div></div> 1.5%  |
| 2                                                                                                                                    | Akseptabelt                                                                                                                                                                                                                                                                                                 | 71      | <div><div></div></div> 1.5%  |
| 3                                                                                                                                    | Noe akseptabelt                                                                                                                                                                                                                                                                                             | 13      | <div><div></div></div> 0.3%  |
| 4                                                                                                                                    | Lite akseptabelt                                                                                                                                                                                                                                                                                            | 12      | <div><div></div></div> 0.3%  |
| 5                                                                                                                                    | Ikke akseptabelt i det hele tatt                                                                                                                                                                                                                                                                            | 7       | <div><div></div></div> 0.1%  |
| 97                                                                                                                                   | Ikke svart                                                                                                                                                                                                                                                                                                  | 5       | <div><div></div></div> 0.1%  |
| 98                                                                                                                                   | Ikke spurt                                                                                                                                                                                                                                                                                                  | 4512    | <div><div></div></div> 96.2% |
| Advarsel: disse tallene indikerer antall enheter (cases) i datafilen. De kan ikke tolkes som oppsummert statistikk for populasjonen. |                                                                                                                                                                                                                                                                                                             |         |                              |
| # r7pad13c: Akseptabelt: Enstemmig, nabokonflikter kan gå til domstol før mekling                                                    |                                                                                                                                                                                                                                                                                                             |         |                              |
| Informasjon                                                                                                                          | [Type= diskret] [Format=numeric] [Rekkevidde= 1-5] [Missing=*]                                                                                                                                                                                                                                              |         |                              |
| Statistikk [NW/ W]                                                                                                                   | [Gyldige=4689 /-] [Ugyldig=0 /-]                                                                                                                                                                                                                                                                            |         |                              |
| Tekst før spørsmål                                                                                                                   | Hvert år oppstår det tusenvis av nabokonflikter i Norge. Se for deg at Høyesterett i en enstemmig avgjørelse besluttet at personer som er involvert i nabokonflikter (for eksempel om høyde på trær og gjerder) skal ha lov til å gå direkte til søksmål i domstolene uten først å ha forsøkt mekling.      |         |                              |
| Spørsmålstekst                                                                                                                       | Generelt sett, i hvilken grad mener du dette ville ha vært en akseptabel avgjørelse fra Høyesterett?                                                                                                                                                                                                        |         |                              |
| Instruksjoner til intervjueren                                                                                                       | [Spurt hvis u=3 og ran33=3. ]                                                                                                                                                                                                                                                                               |         |                              |
| Kommentarer                                                                                                                          | Hvert år oppstår det tusenvis av nabokonflikter i Norge. Se for deg at Høyesterett i en enstemmig avgjørelse beslutte                                                                                                                                                                                       |         |                              |
| Verdi                                                                                                                                | Merkelapp                                                                                                                                                                                                                                                                                                   | Enheter | Prosent                      |
| 1                                                                                                                                    | Svært akseptabelt                                                                                                                                                                                                                                                                                           | 2       | <div><div></div></div> 0.0%  |
| 2                                                                                                                                    | Akseptabelt                                                                                                                                                                                                                                                                                                 | 16      | <div><div></div></div> 0.3%  |
| 3                                                                                                                                    | Noe akseptabelt                                                                                                                                                                                                                                                                                             | 24      | <div><div></div></div> 0.5%  |
| 4                                                                                                                                    | Lite akseptabelt                                                                                                                                                                                                                                                                                            | 65      | <div><div></div></div> 1.4%  |
| 5                                                                                                                                    | Ikke akseptabelt i det hele tatt                                                                                                                                                                                                                                                                            | 44      | <div><div></div></div> 0.9%  |
| 97                                                                                                                                   | Ikke svart                                                                                                                                                                                                                                                                                                  | 5       | <div><div></div></div> 0.1%  |
| 98                                                                                                                                   | Ikke spurt                                                                                                                                                                                                                                                                                                  | 4533    | <div><div></div></div> 96.7% |
| Advarsel: disse tallene indikerer antall enheter (cases) i datafilen. De kan ikke tolkes som oppsummert statistikk for populasjonen. |                                                                                                                                                                                                                                                                                                             |         |                              |
| # r7pad13d: Akseptabelt: Enstemmig, nabokonflikter kan ikke gå til domstol før mekling                                               |                                                                                                                                                                                                                                                                                                             |         |                              |
| Informasjon                                                                                                                          | [Type= diskret] [Format=numeric] [Rekkevidde= 1-5] [Missing=*]                                                                                                                                                                                                                                              |         |                              |
| Statistikk [NW/ W]                                                                                                                   | [Gyldige=4689 /-] [Ugyldig=0 /-]                                                                                                                                                                                                                                                                            |         |                              |
| Tekst før spørsmål                                                                                                                   | Hvert år oppstår det tusenvis av nabokonflikter i Norge. Se for deg at Høyesterett i en enstemmig avgjørelse besluttet at personer som er involvert i nabokonflikter (for eksempel om høyde på trær og gjerder) ikke skal ha lov til å gå direkte til søksmål i domstolene uten først å ha forsøkt mekling. |         |                              |
| Spørsmålstekst                                                                                                                       | Generelt sett, i hvilken grad mener du dette ville ha vært en akseptabel avgjørelse fra Høyesterett?                                                                                                                                                                                                        |         |                              |
| Instruksjoner til intervjueren                                                                                                       | [Spurt hvis u=3 og ran33=4. ]                                                                                                                                                                                                                                                                               |         |                              |
| Kommentarer                                                                                                                          | Hvert år oppstår det tusenvis av nabokonflikter i Norge. Se for deg at Høyesterett i en enstemmig avgjørelse beslutte                                                                                                                                                                                       |         |                              |
| Verdi                                                                                                                                | Merkelapp                                                                                                                                                                                                                                                                                                   | Enheter | Prosent                      |
| 1                                                                                                                                    | Svært akseptabelt                                                                                                                                                                                                                                                                                           | 76      | <div><div></div></div> 1.6%  |
| 2                                                                                                                                    | Akseptabelt                                                                                                                                                                                                                                                                                                 | 57      | <div><div></div></div> 1.2%  |
| 3                                                                                                                                    | Noe akseptabelt                                                                                                                                                                                                                                                                                             | 14      | <div><div></div></div> 0.3%  |

| # r7pad13d: Akseptabelt: Enstemmig, nabokonflikter kan ikke gå til domstol før mekling                                               |                                                                                                                                                                                                                                                                                                                               |         |         |
|--------------------------------------------------------------------------------------------------------------------------------------|-------------------------------------------------------------------------------------------------------------------------------------------------------------------------------------------------------------------------------------------------------------------------------------------------------------------------------|---------|---------|
| Verdi                                                                                                                                | Merkelapp                                                                                                                                                                                                                                                                                                                     | Enheter | Prosent |
| 4                                                                                                                                    | Lite akseptabelt                                                                                                                                                                                                                                                                                                              | 6       | 0.1%    |
| 5                                                                                                                                    | Ikke akseptabelt i det hele tatt                                                                                                                                                                                                                                                                                              | 5       | 0.1%    |
| 97                                                                                                                                   | Ikke svart                                                                                                                                                                                                                                                                                                                    | 5       | 0.1%    |
| 98                                                                                                                                   | Ikke spurt                                                                                                                                                                                                                                                                                                                    | 4526    | 96.5%   |
| Advarsel: disse tallene indikerer antall enheter (cases) i datafilen. De kan ikke tolkes som oppsummert statistikk for populasjonen. |                                                                                                                                                                                                                                                                                                                               |         |         |
| # r7pad13e: Akseptabelt: Knappt flertall, nabokonflikter kan gå til domstol før mekling                                              |                                                                                                                                                                                                                                                                                                                               |         |         |
| Informasjon                                                                                                                          | [Type= diskret] [Format=numeric] [Rekkevidde= 1-5] [Missing=*]                                                                                                                                                                                                                                                                |         |         |
| Statistikk [NW/ W]                                                                                                                   | [Gyldige=4689 /-] [Ugyldig=0 /-]                                                                                                                                                                                                                                                                                              |         |         |
| Tekst før spørsmål                                                                                                                   | Hvert år oppstår det tusenvis av nabokonflikter i Norge. Se for deg at Høyesterett ved et knapt flertall på tre mot to dommere besluttet at personer som er involvert i nabokonflikter (for eksempel om høyde på trær og gjerder) skal ha lov til å gå direkte til søksmål i domstolene uten først å ha forsøkt mekling.      |         |         |
| Spørsmålstekst                                                                                                                       | Generelt sett, i hvilken grad mener du dette ville ha vært en akseptabel avgjørelse fra Høyesterett?                                                                                                                                                                                                                          |         |         |
| Instruksjoner til intervjueren                                                                                                       | [Spurt hvis u=3 og ran33=5. ]                                                                                                                                                                                                                                                                                                 |         |         |
| Kommentarer                                                                                                                          | Hvert år oppstår det tusenvis av nabokonflikter i Norge. Se for deg at Høyesterett ved et knapt flertall på tre mot t                                                                                                                                                                                                         |         |         |
| Verdi                                                                                                                                | Merkelapp                                                                                                                                                                                                                                                                                                                     | Enheter | Prosent |
| 1                                                                                                                                    | Svært akseptabelt                                                                                                                                                                                                                                                                                                             | 3       | 0.1%    |
| 2                                                                                                                                    | Akseptabelt                                                                                                                                                                                                                                                                                                                   | 23      | 0.5%    |
| 3                                                                                                                                    | Noe akseptabelt                                                                                                                                                                                                                                                                                                               | 28      | 0.6%    |
| 4                                                                                                                                    | Lite akseptabelt                                                                                                                                                                                                                                                                                                              | 82      | 1.7%    |
| 5                                                                                                                                    | Ikke akseptabelt i det hele tatt                                                                                                                                                                                                                                                                                              | 51      | 1.1%    |
| 97                                                                                                                                   | Ikke svart                                                                                                                                                                                                                                                                                                                    | 7       | 0.1%    |
| 98                                                                                                                                   | Ikke spurt                                                                                                                                                                                                                                                                                                                    | 4495    | 95.9%   |
| Advarsel: disse tallene indikerer antall enheter (cases) i datafilen. De kan ikke tolkes som oppsummert statistikk for populasjonen. |                                                                                                                                                                                                                                                                                                                               |         |         |
| # r7pad13f: Akseptabelt: Knappt flertall, nabokonflikter kan ikke gå til domstol før mekling                                         |                                                                                                                                                                                                                                                                                                                               |         |         |
| Informasjon                                                                                                                          | [Type= diskret] [Format=numeric] [Rekkevidde= 1-5] [Missing=*]                                                                                                                                                                                                                                                                |         |         |
| Statistikk [NW/ W]                                                                                                                   | [Gyldige=4689 /-] [Ugyldig=0 /-]                                                                                                                                                                                                                                                                                              |         |         |
| Tekst før spørsmål                                                                                                                   | Hvert år oppstår det tusenvis av nabokonflikter i Norge. Se for deg at Høyesterett ved et knapt flertall på tre mot to dommere besluttet at personer som er involvert i nabokonflikter (for eksempel om høyde på trær og gjerder) ikke skal ha lov til å gå direkte til søksmål i domstolene uten først å ha forsøkt mekling. |         |         |
| Spørsmålstekst                                                                                                                       | Generelt sett, i hvilken grad mener du dette ville ha vært en akseptabel avgjørelse fra Høyesterett?                                                                                                                                                                                                                          |         |         |
| Instruksjoner til intervjueren                                                                                                       | [Spurt hvis u=3 og ran33=6. ]                                                                                                                                                                                                                                                                                                 |         |         |
| Kommentarer                                                                                                                          | Hvert år oppstår det tusenvis av nabokonflikter i Norge. Se for deg at Høyesterett ved et knapt flertall på tre mot t                                                                                                                                                                                                         |         |         |
| Verdi                                                                                                                                | Merkelapp                                                                                                                                                                                                                                                                                                                     | Enheter | Prosent |
| 1                                                                                                                                    | Svært akseptabelt                                                                                                                                                                                                                                                                                                             | 82      | 1.7%    |
| 2                                                                                                                                    | Akseptabelt                                                                                                                                                                                                                                                                                                                   | 76      | 1.6%    |
| 3                                                                                                                                    | Noe akseptabelt                                                                                                                                                                                                                                                                                                               | 26      | 0.6%    |
| 4                                                                                                                                    | Lite akseptabelt                                                                                                                                                                                                                                                                                                              | 7       | 0.1%    |
| 5                                                                                                                                    | Ikke akseptabelt i det hele tatt                                                                                                                                                                                                                                                                                              | 3       | 0.1%    |
| 97                                                                                                                                   | Ikke svart                                                                                                                                                                                                                                                                                                                    | 7       | 0.1%    |
| 98                                                                                                                                   | Ikke spurt                                                                                                                                                                                                                                                                                                                    | 4488    | 95.7%   |
| Advarsel: disse tallene indikerer antall enheter (cases) i datafilen. De kan ikke tolkes som oppsummert statistikk for populasjonen. |                                                                                                                                                                                                                                                                                                                               |         |         |

| # r7ran17: [Randomiserer hvis u=4. ]                                                                                                  |                                                                                                                                                                                                                                                                                                                                                                                                                                                                                                                                         |         |                   |
|---------------------------------------------------------------------------------------------------------------------------------------|-----------------------------------------------------------------------------------------------------------------------------------------------------------------------------------------------------------------------------------------------------------------------------------------------------------------------------------------------------------------------------------------------------------------------------------------------------------------------------------------------------------------------------------------|---------|-------------------|
| Informasjon                                                                                                                           | [Type= diskret] [Format=numeric] [Rekkevidde= 1-5] [Missing=*]                                                                                                                                                                                                                                                                                                                                                                                                                                                                          |         |                   |
| Statistikk [NW/ W]                                                                                                                    | [Gyldige=1184 /-] [Ugyldig=3505 /-]                                                                                                                                                                                                                                                                                                                                                                                                                                                                                                     |         |                   |
| Instruksjoner til intervjueren                                                                                                        | [Randomiserer hvis u=4. ]                                                                                                                                                                                                                                                                                                                                                                                                                                                                                                               |         |                   |
| Verdi                                                                                                                                 | Merkelapp                                                                                                                                                                                                                                                                                                                                                                                                                                                                                                                               | Enheter | Prosent           |
| 1                                                                                                                                     | 1                                                                                                                                                                                                                                                                                                                                                                                                                                                                                                                                       | 235     | <div></div> 19.8% |
| 2                                                                                                                                     | 2                                                                                                                                                                                                                                                                                                                                                                                                                                                                                                                                       | 221     | <div></div> 18.7% |
| 3                                                                                                                                     | 3                                                                                                                                                                                                                                                                                                                                                                                                                                                                                                                                       | 245     | <div></div> 20.7% |
| 4                                                                                                                                     | 4                                                                                                                                                                                                                                                                                                                                                                                                                                                                                                                                       | 225     | <div></div> 19.0% |
| 5                                                                                                                                     | 5                                                                                                                                                                                                                                                                                                                                                                                                                                                                                                                                       | 258     | <div></div> 21.8% |
| Sysmiss                                                                                                                               |                                                                                                                                                                                                                                                                                                                                                                                                                                                                                                                                         | 3505    |                   |
| Advarsel: disse tallene indikerer antall enheter (cases) i datafilen. De kan ikke tolkes som oppsummert statistikk for populasjonen.  |                                                                                                                                                                                                                                                                                                                                                                                                                                                                                                                                         |         |                   |
| # r7pad1a: Enig/uenig: Myndighetene rett til å internere personer de tror kan være potensielle terrorister, foreslått i Storbritannia |                                                                                                                                                                                                                                                                                                                                                                                                                                                                                                                                         |         |                   |
| Informasjon                                                                                                                           | [Type= diskret] [Format=numeric] [Rekkevidde= 1-7] [Missing=*]                                                                                                                                                                                                                                                                                                                                                                                                                                                                          |         |                   |
| Statistikk [NW/ W]                                                                                                                    | [Gyldige=4689 /-] [Ugyldig=0 /-]                                                                                                                                                                                                                                                                                                                                                                                                                                                                                                        |         |                   |
| Tekst før spørsmål                                                                                                                    | I Storbritannia er det foreslått å gi myndighetene lov til å internere (holde i forvaring uten formell siktelse og domstolsbehandling) personer de tror kan være potensielle terrorister.<br>Se for deg at myndighetene i Norge ber om lov til å internere personer de tror kan være involvert i terrorvirksomhet. Noen mener myndighetene bør få lov fordi det kan redusere risikoen for terror, andre mener myndighetene ikke bør få lov fordi det vil bryte med grunnregelen om at enhver er uskyldig inntil det motsatte er bevist. |         |                   |
| Spørsmålstekst                                                                                                                        | Hvor enig eller uenig er du i at myndighetene skal få rett til å internere personer de tror kan være potensielle terrorister?                                                                                                                                                                                                                                                                                                                                                                                                           |         |                   |
| Instruksjoner til intervjueren                                                                                                        | [Spurt hvis u=4 og ran17=1. ]                                                                                                                                                                                                                                                                                                                                                                                                                                                                                                           |         |                   |
| Kommentarer                                                                                                                           | I Storbritannia er det foreslått å gi myndighetene lov til å internere (holde i forvaring uten formell siktelse og dom                                                                                                                                                                                                                                                                                                                                                                                                                  |         |                   |
| Verdi                                                                                                                                 | Merkelapp                                                                                                                                                                                                                                                                                                                                                                                                                                                                                                                               | Enheter | Prosent           |
| 1                                                                                                                                     | Svært enig                                                                                                                                                                                                                                                                                                                                                                                                                                                                                                                              | 35      | <div></div> 0.7%  |
| 2                                                                                                                                     | Enig                                                                                                                                                                                                                                                                                                                                                                                                                                                                                                                                    | 46      | <div></div> 1.0%  |
| 3                                                                                                                                     | Noe enig                                                                                                                                                                                                                                                                                                                                                                                                                                                                                                                                | 67      | <div></div> 1.4%  |
| 4                                                                                                                                     | Verken enig eller uenig                                                                                                                                                                                                                                                                                                                                                                                                                                                                                                                 | 20      | <div></div> 0.4%  |
| 5                                                                                                                                     | Noe uenig                                                                                                                                                                                                                                                                                                                                                                                                                                                                                                                               | 22      | <div></div> 0.5%  |
| 6                                                                                                                                     | Uenig                                                                                                                                                                                                                                                                                                                                                                                                                                                                                                                                   | 27      | <div></div> 0.6%  |
| 7                                                                                                                                     | Svært uenig                                                                                                                                                                                                                                                                                                                                                                                                                                                                                                                             | 15      | <div></div> 0.3%  |
| 97                                                                                                                                    | Ikke svart                                                                                                                                                                                                                                                                                                                                                                                                                                                                                                                              | 3       | <div></div> 0.1%  |
| 98                                                                                                                                    | Ikke spurt                                                                                                                                                                                                                                                                                                                                                                                                                                                                                                                              | 4454    | <div></div> 95.0% |
| Advarsel: disse tallene indikerer antall enheter (cases) i datafilen. De kan ikke tolkes som oppsummert statistikk for populasjonen.  |                                                                                                                                                                                                                                                                                                                                                                                                                                                                                                                                         |         |                   |
| # r7pad1b: Enig/uenig: Myndighetene rett til å internere personer de tror kan være potensielle terrorister, foreslått i Danmark       |                                                                                                                                                                                                                                                                                                                                                                                                                                                                                                                                         |         |                   |
| Informasjon                                                                                                                           | [Type= diskret] [Format=numeric] [Rekkevidde= 1-7] [Missing=*]                                                                                                                                                                                                                                                                                                                                                                                                                                                                          |         |                   |
| Statistikk [NW/ W]                                                                                                                    | [Gyldige=4689 /-] [Ugyldig=0 /-]                                                                                                                                                                                                                                                                                                                                                                                                                                                                                                        |         |                   |
| Tekst før spørsmål                                                                                                                    | I Danmark er det foreslått å gi myndighetene lov til å internere (holde i forvaring uten formell siktelse og domstolsbehandling) personer de tror kan være potensielle terrorister.<br>Se for deg at myndighetene i Norge ber om lov til å internere personer de tror kan være involvert i terrorvirksomhet. Noen mener myndighetene bør få lov fordi det kan redusere risikoen for terror, andre mener myndighetene ikke bør få lov fordi det vil bryte med grunnregelen om at enhver er uskyldig inntil det motsatte er bevist.       |         |                   |
| Spørsmålstekst                                                                                                                        | Hvor enig eller uenig er du i at myndighetene skal få rett til å internere personer de tror kan være potensielle terrorister?                                                                                                                                                                                                                                                                                                                                                                                                           |         |                   |

## # r7pad1b: Enig/uenig: Myndighetene rett til å internere personer de tror kan være potensielle terrorister, foreslått i Danmark

|                                       |                                                                                                                        |
|---------------------------------------|------------------------------------------------------------------------------------------------------------------------|
| <b>Instruksjoner til intervjueren</b> | [Spurt hvis u=4 og ran17=2. ]                                                                                          |
| <b>Kommentarer</b>                    | I Danmark er det foreslått å gi myndighetene lov til å internere (holde i forvaring uten formell siktelse og domstolsb |

| Verdi | Merkelapp               | Enheter | Prosent |
|-------|-------------------------|---------|---------|
| 1     | Svært enig              | 37      | 0.8%    |
| 2     | Enig                    | 42      | 0.9%    |
| 3     | Noe enig                | 57      | 1.2%    |
| 4     | Verken enig eller uenig | 19      | 0.4%    |
| 5     | Noe uenig               | 20      | 0.4%    |
| 6     | Uenig                   | 35      | 0.7%    |
| 7     | Svært uenig             | 8       | 0.2%    |
| 97    | Ikke svart              | 3       | 0.1%    |
| 98    | Ikke spurt              | 4468    | 95.3%   |

Advarsel: disse tallene indikerer antall enheter (cases) i datafilen. De kan ikke tolkes som oppsummert statistikk for populasjonen.

## # r7pad1c: Enig/uenig: Myndighetene rett til å internere personer de tror kan være potensielle terrorister, foreslått i Tyskland

|                                       |                                                                                                                                                                                                                                                                                                                                                                                                                                                                                                                                    |
|---------------------------------------|------------------------------------------------------------------------------------------------------------------------------------------------------------------------------------------------------------------------------------------------------------------------------------------------------------------------------------------------------------------------------------------------------------------------------------------------------------------------------------------------------------------------------------|
| <b>Informasjon</b>                    | [Type= diskret] [Format=numeric] [Rekkevidde= 1-7] [Missing=*]                                                                                                                                                                                                                                                                                                                                                                                                                                                                     |
| <b>Statistikk [NW/ W]</b>             | [Gyldige=4689 /-] [Ugyldig=0 /-]                                                                                                                                                                                                                                                                                                                                                                                                                                                                                                   |
| <b>Tekst før spørsmål</b>             | I Tyskland er det foreslått å gi myndighetene lov til å internere (holde i forvaring uten formell siktelse og domstolsbehandling) personer de tror kan være potensielle terrorister.<br>Se for deg at myndighetene i Norge ber om lov til å internere personer de tror kan være involvert i terrorvirksomhet. Noen mener myndighetene bør få lov fordi det kan redusere risikoen for terror, andre mener myndighetene ikke bør få lov fordi det vil bryte med grunnregelen om at enhver er uskyldig inntil det motsatte er bevist. |
| <b>Spørsmålstekst</b>                 | Hvor enig eller uenig er du i at myndighetene skal få rett til å internere personer de tror kan være potensielle terrorister?                                                                                                                                                                                                                                                                                                                                                                                                      |
| <b>Instruksjoner til intervjueren</b> | [Spurt hvis u=4 og ran17=3. ]                                                                                                                                                                                                                                                                                                                                                                                                                                                                                                      |
| <b>Kommentarer</b>                    | I Tyskland er det foreslått å gi myndighetene lov til å internere (holde i forvaring uten formell siktelse og domstols                                                                                                                                                                                                                                                                                                                                                                                                             |

| Verdi | Merkelapp               | Enheter | Prosent |
|-------|-------------------------|---------|---------|
| 1     | Svært enig              | 32      | 0.7%    |
| 2     | Enig                    | 47      | 1.0%    |
| 3     | Noe enig                | 66      | 1.4%    |
| 4     | Verken enig eller uenig | 29      | 0.6%    |
| 5     | Noe uenig               | 27      | 0.6%    |
| 6     | Uenig                   | 25      | 0.5%    |
| 7     | Svært uenig             | 15      | 0.3%    |
| 97    | Ikke svart              | 4       | 0.1%    |
| 98    | Ikke spurt              | 4444    | 94.8%   |

Advarsel: disse tallene indikerer antall enheter (cases) i datafilen. De kan ikke tolkes som oppsummert statistikk for populasjonen.

## # r7pad1d: Enig/uenig: Myndighetene rett til å internere personer de tror kan være potensielle terrorister, foreslått i USA

|                           |                                                                                                                                                                                 |
|---------------------------|---------------------------------------------------------------------------------------------------------------------------------------------------------------------------------|
| <b>Informasjon</b>        | [Type= diskret] [Format=numeric] [Rekkevidde= 1-7] [Missing=*]                                                                                                                  |
| <b>Statistikk [NW/ W]</b> | [Gyldige=4689 /-] [Ugyldig=0 /-]                                                                                                                                                |
| <b>Tekst før spørsmål</b> | I USA er det foreslått å gi myndighetene lov til å internere (holde i forvaring uten formell siktelse og domstolsbehandling) personer de tror kan være potensielle terrorister. |

## # r7pad1d: Enig/uenig: Myndighetene rett til å internere personer de tror kan være potensielle terrorister, foreslått i USA

|                                       |                                                                                                                                                                                                                                                                                                                                            |
|---------------------------------------|--------------------------------------------------------------------------------------------------------------------------------------------------------------------------------------------------------------------------------------------------------------------------------------------------------------------------------------------|
|                                       | Se for deg at myndighetene i Norge ber om lov til å internere personer de tror kan være involvert i terrorvirksomhet. Noen mener myndighetene bør få lov fordi det kan redusere risikoen for terror, andre mener myndighetene ikke bør få lov fordi det vil bryte med grunnregelen om at enhver er uskyldig inntil det motsatte er bevist. |
| <b>Spørsmålstekst</b>                 | Hvor enig eller uenig er du i at myndighetene skal få rett til å internere personer de tror kan være potensielle terrorister?                                                                                                                                                                                                              |
| <b>Instruksjoner til intervjueren</b> | [Spurt hvis u=4 og ran17=4. ]                                                                                                                                                                                                                                                                                                              |
| <b>Kommentarer</b>                    | I USA er det foreslått å gi myndighetene lov til å internere (holde i forvaring uten formell siktelse og domstolsbehan                                                                                                                                                                                                                     |

| Verdi | Merkelapp               | Enheter | Prosent |
|-------|-------------------------|---------|---------|
| 1     | Svært enig              | 33      | 0.7%    |
| 2     | Enig                    | 34      | 0.7%    |
| 3     | Noe enig                | 59      | 1.3%    |
| 4     | Verken enig eller uenig | 25      | 0.5%    |
| 5     | Noe uenig               | 23      | 0.5%    |
| 6     | Uenig                   | 32      | 0.7%    |
| 7     | Svært uenig             | 16      | 0.3%    |
| 97    | Ikke svart              | 3       | 0.1%    |
| 98    | Ikke spurt              | 4464    | 95.2%   |

Advarsel: disse tallene indikerer antall enheter (cases) i datafilen. De kan ikke tolkes som oppsummert statistikk for populasjonen.

## # r7pad1e: Enig/uenig: Myndighetene rett til å internere personer de tror kan være potensielle terrorister

|                                       |                                                                                                                                                                                                                                                                                                                                                                                                            |
|---------------------------------------|------------------------------------------------------------------------------------------------------------------------------------------------------------------------------------------------------------------------------------------------------------------------------------------------------------------------------------------------------------------------------------------------------------|
| <b>Informasjon</b>                    | [Type= diskret] [Format=numeric] [Rekkevidde= 1-7] [Missing=*]                                                                                                                                                                                                                                                                                                                                             |
| <b>Statistikk [NW/ W]</b>             | [Gyldige=4689 /-] [Ugyldig=0 /-]                                                                                                                                                                                                                                                                                                                                                                           |
| <b>Tekst før spørsmål</b>             | Se for deg at myndighetene i Norge ber om lov til å internere (holde i forvaring uten formell siktelse og domstolsbehandling) personer de tror kan være involvert i terrorvirksomhet. Noen mener myndighetene bør få lov fordi det kan redusere risikoen for terror, andre mener myndighetene ikke bør få lov fordi det vil bryte med grunnregelen om at enhver er uskyldig inntil det motsatte er bevist. |
| <b>Spørsmålstekst</b>                 | Hvor enig eller uenig er du i at myndighetene skal få rett til å internere personer de tror kan være potensielle terrorister?                                                                                                                                                                                                                                                                              |
| <b>Instruksjoner til intervjueren</b> | [Spurt hvis u=4 og ran17=5. ]                                                                                                                                                                                                                                                                                                                                                                              |
| <b>Kommentarer</b>                    | Se for deg at myndighetene i Norge ber om lov til å internere (holde i forvaring uten formell siktelse og domstolsbehand                                                                                                                                                                                                                                                                                   |

| Verdi | Merkelapp               | Enheter | Prosent |
|-------|-------------------------|---------|---------|
| 1     | Svært enig              | 43      | 0.9%    |
| 2     | Enig                    | 53      | 1.1%    |
| 3     | Noe enig                | 68      | 1.5%    |
| 4     | Verken enig eller uenig | 29      | 0.6%    |
| 5     | Noe uenig               | 18      | 0.4%    |
| 6     | Uenig                   | 31      | 0.7%    |
| 7     | Svært uenig             | 16      | 0.3%    |
| 97    | Ikke svart              | 0       |         |
| 98    | Ikke spurt              | 4431    | 94.5%   |

Advarsel: disse tallene indikerer antall enheter (cases) i datafilen. De kan ikke tolkes som oppsummert statistikk for populasjonen.

## # r7pad2\_1: Gjort det siste året for å endre samfunnet: Boikottet varer

|                           |                                                                                                                                  |
|---------------------------|----------------------------------------------------------------------------------------------------------------------------------|
| <b>Informasjon</b>        | [Type= diskret] [Format=numeric] [Rekkevidde= 1-1] [Missing=*]                                                                   |
| <b>Statistikk [NW/ W]</b> | [Gyldige=4689 /-] [Ugyldig=0 /-]                                                                                                 |
| <b>Tekst før spørsmål</b> | Har du i løpet av de siste 12 månedene gjort noe av det følgende i et forsøk på å endre forhold i samfunnet<br>Flere svar mulig. |



| # r7pad2_1: Gjort det siste året for å endre samfunnet: Boikottet varer                                                              |                                                                                                                                  |         |                              |
|--------------------------------------------------------------------------------------------------------------------------------------|----------------------------------------------------------------------------------------------------------------------------------|---------|------------------------------|
| Spørsmålstekst                                                                                                                       | Boikottet varer.                                                                                                                 |         |                              |
| Instruksjoner til intervjueren                                                                                                       | [Spurt hvis u=4. ]                                                                                                               |         |                              |
| Kommentarer                                                                                                                          | Boikottet varer. (Har du i løpet av de siste 12 månedene gjort noe av det følgende i et forsøk på å endre forhold i              |         |                              |
| Verdi                                                                                                                                | Merkelapp                                                                                                                        | Enheter | Prosent                      |
| 0                                                                                                                                    |                                                                                                                                  | 911     | <div><div></div></div> 19.4% |
| 1                                                                                                                                    | Boikottet varer.                                                                                                                 | 269     | <div><div></div></div> 5.7%  |
| 97                                                                                                                                   | Ikke svart                                                                                                                       | 23      | <div><div></div></div> 0.5%  |
| 98                                                                                                                                   | Ikke spurt                                                                                                                       | 3486    | <div><div></div></div> 74.3% |
| Advarsel: disse tallene indikerer antall enheter (cases) i datafilen. De kan ikke tolkes som oppsummert statistikk for populasjonen. |                                                                                                                                  |         |                              |
| # r7pad2_2: Gjort det siste året for å endre samfunnet: Kjøpt varer av etiske/moralske grunner                                       |                                                                                                                                  |         |                              |
| Informasjon                                                                                                                          | [Type= diskret] [Format=numeric] [Rekkevidde= 1-1] [Missing=*]                                                                   |         |                              |
| Statistikk [NW/ W]                                                                                                                   | [Gyldige=4689 /-] [Ugyldig=0 /-]                                                                                                 |         |                              |
| Tekst før spørsmål                                                                                                                   | Har du i løpet av de siste 12 månedene gjort noe av det følgende i et forsøk på å endre forhold i samfunnet<br>Flere svar mulig. |         |                              |
| Spørsmålstekst                                                                                                                       | Kjøpt bestemte varer av etiske, miljømessige eller moralske grunner.                                                             |         |                              |
| Instruksjoner til intervjueren                                                                                                       | [Spurt hvis u=4. ]                                                                                                               |         |                              |
| Kommentarer                                                                                                                          | Kjøpt bestemte varer av etiske, miljømessige eller moralske grunner. (Har du i løpet av de siste 12 månedene gjort no            |         |                              |
| Verdi                                                                                                                                | Merkelapp                                                                                                                        | Enheter | Prosent                      |
| 0                                                                                                                                    |                                                                                                                                  | 800     | <div><div></div></div> 17.1% |
| 1                                                                                                                                    | Kjøpt bestemte varer av etiske, miljømessige eller moralske grunner.                                                             | 380     | <div><div></div></div> 8.1%  |
| 97                                                                                                                                   | Ikke svart                                                                                                                       | 23      | <div><div></div></div> 0.5%  |
| 98                                                                                                                                   | Ikke spurt                                                                                                                       | 3486    | <div><div></div></div> 74.3% |
| Advarsel: disse tallene indikerer antall enheter (cases) i datafilen. De kan ikke tolkes som oppsummert statistikk for populasjonen. |                                                                                                                                  |         |                              |
| # r7pad2_3: Gjort det siste året for å endre samfunnet: Kjøpt fairtrade-produkt til tross for billigere alternativ                   |                                                                                                                                  |         |                              |
| Informasjon                                                                                                                          | [Type= diskret] [Format=numeric] [Rekkevidde= 1-1] [Missing=*]                                                                   |         |                              |
| Statistikk [NW/ W]                                                                                                                   | [Gyldige=4689 /-] [Ugyldig=0 /-]                                                                                                 |         |                              |
| Tekst før spørsmål                                                                                                                   | Har du i løpet av de siste 12 månedene gjort noe av det følgende i et forsøk på å endre forhold i samfunnet<br>Flere svar mulig. |         |                              |
| Spørsmålstekst                                                                                                                       | Kjøpt fairtrade-produkter selv om det fantes andre, billigere alternativer.                                                      |         |                              |
| Instruksjoner til intervjueren                                                                                                       | [Spurt hvis u=4. ]                                                                                                               |         |                              |
| Kommentarer                                                                                                                          | Kjøpt fairtrade-produkter selv om det fantes andre, billigere alternativer. (Har du i løpet av de siste 12 månedene gj           |         |                              |
| Verdi                                                                                                                                | Merkelapp                                                                                                                        | Enheter | Prosent                      |
| 0                                                                                                                                    |                                                                                                                                  | 815     | <div><div></div></div> 17.4% |
| 1                                                                                                                                    | Kjøpt fairtrade-produkter selv om det fantes andre, billigere alternativer.                                                      | 365     | <div><div></div></div> 7.8%  |
| 97                                                                                                                                   | Ikke svart                                                                                                                       | 23      | <div><div></div></div> 0.5%  |
| 98                                                                                                                                   | Ikke spurt                                                                                                                       | 3486    | <div><div></div></div> 74.3% |
| Advarsel: disse tallene indikerer antall enheter (cases) i datafilen. De kan ikke tolkes som oppsummert statistikk for populasjonen. |                                                                                                                                  |         |                              |
| # r7pad2_4: Gjort det siste året for å endre samfunnet: Kjøpt økologiske varer til tross for billigere alternativ                    |                                                                                                                                  |         |                              |
| Informasjon                                                                                                                          | [Type= diskret] [Format=numeric] [Rekkevidde= 1-1] [Missing=*]                                                                   |         |                              |
| Statistikk [NW/ W]                                                                                                                   | [Gyldige=4689 /-] [Ugyldig=0 /-]                                                                                                 |         |                              |

# r7pad2\_4: Gjort det siste året for å endre samfunnet: Kjøpt økologiske varer til tross for billigere alternativ

Tekst før spørsmål

Har du i løpet av de siste 12 månedene gjort noe av det følgende i et forsøk på å endre forhold i samfunnet  
Flere svar mulig.

Spørsmålstekst

Valgt økologiske varer selv om det fantes andre, billigere alternativer.

Instruksjoner til intervjueren

[Spurt hvis u=4. ]

Kommentarer

Valgt økologiske varer selv om det fantes andre, billigere alternativer. (Har du i løpet av de siste 12 månedene gjort

| Verdi | Merkelapp                                                                | Enheter | Prosent           |
|-------|--------------------------------------------------------------------------|---------|-------------------|
| 0     |                                                                          | 728     | <div></div> 15.5% |
| 1     | Valgt økologiske varer selv om det fantes andre, billigere alternativer. | 452     | <div></div> 9.6%  |
| 97    | Ikke svart                                                               | 23      | <div></div> 0.5%  |
| 98    | Ikke spurt                                                               | 3486    | <div></div> 74.3% |

Advarsel: disse tallene indikerer antall enheter (cases) i datafilen. De kan ikke tolkes som oppsummert statistikk for populasjonen.

# r7pad2\_5: Gjort det siste året for å endre samfunnet: Redusert/kuttet kjøttforbruk

Informasjon

[Type= diskret] [Format=numeric] [Rekkevidde= 1-1] [Missing=\*]

Statistikk [NW/ W]

[Gyldige=4689 /-] [Ugyldig=0 /-]

Tekst før spørsmål

Har du i løpet av de siste 12 månedene gjort noe av det følgende i et forsøk på å endre forhold i samfunnet  
Flere svar mulig.

Spørsmålstekst

Redusert eller kuttet kjøttforbruket ditt.

Instruksjoner til intervjueren

[Spurt hvis u=4. ]

Kommentarer

Redusert eller kuttet kjøttforbruket ditt. (Har du i løpet av de siste 12 månedene gjort noe av det følgende i et for

| Verdi | Merkelapp                                  | Enheter | Prosent           |
|-------|--------------------------------------------|---------|-------------------|
| 0     |                                            | 841     | <div></div> 17.9% |
| 1     | Redusert eller kuttet kjøttforbruket ditt. | 339     | <div></div> 7.2%  |
| 97    | Ikke svart                                 | 23      | <div></div> 0.5%  |
| 98    | Ikke spurt                                 | 3486    | <div></div> 74.3% |

Advarsel: disse tallene indikerer antall enheter (cases) i datafilen. De kan ikke tolkes som oppsummert statistikk for populasjonen.

# r7pad2\_6: Gjort det siste året for å endre samfunnet: Kjøpt færre varer enn ellers

Informasjon

[Type= diskret] [Format=numeric] [Rekkevidde= 1-1] [Missing=\*]

Statistikk [NW/ W]

[Gyldige=4689 /-] [Ugyldig=0 /-]

Tekst før spørsmål

Har du i løpet av de siste 12 månedene gjort noe av det følgende i et forsøk på å endre forhold i samfunnet  
Flere svar mulig.

Spørsmålstekst

Kjøpt færre varer enn du ellers ville.

Instruksjoner til intervjueren

[Spurt hvis u=4. ]

Kommentarer

Kjøpt færre varer enn du ellers ville. (Har du i løpet av de siste 12 månedene gjort noe av det følgende i et forsø

| Verdi | Merkelapp                              | Enheter | Prosent           |
|-------|----------------------------------------|---------|-------------------|
| 0     |                                        | 831     | <div></div> 17.7% |
| 1     | Kjøpt færre varer enn du ellers ville. | 349     | <div></div> 7.4%  |
| 97    | Ikke svart                             | 23      | <div></div> 0.5%  |
| 98    | Ikke spurt                             | 3486    | <div></div> 74.3% |

Advarsel: disse tallene indikerer antall enheter (cases) i datafilen. De kan ikke tolkes som oppsummert statistikk for populasjonen.

# r7pad2\_7: Gjort det siste året for å endre samfunnet: Heller kjøpt gjenbruksprodukter enn nytt

Informasjon

[Type= diskret] [Format=numeric] [Rekkevidde= 1-1] [Missing=\*]

| # r7pad2_7: Gjort det siste året for å endre samfunnet: Heller kjøpt gjenbruksprodukter enn nytt                                     |                                                                                                                                  |         |                   |
|--------------------------------------------------------------------------------------------------------------------------------------|----------------------------------------------------------------------------------------------------------------------------------|---------|-------------------|
| Statistikk [NW/ W]                                                                                                                   | [Gyldige=4689 /-] [Ugyldig=0 /-]                                                                                                 |         |                   |
| Tekst før spørsmål                                                                                                                   | Har du i løpet av de siste 12 månedene gjort noe av det følgende i et forsøk på å endre forhold i samfunnet<br>Flere svar mulig. |         |                   |
| Spørsmålstekst                                                                                                                       | Handlet gjenbruksprodukter heller enn å kjøpe nytt.                                                                              |         |                   |
| Instruksjoner til intervjueren                                                                                                       | [Spurt hvis u=4. ]                                                                                                               |         |                   |
| Kommentarer                                                                                                                          | Handlet gjenbruksprodukter heller enn å kjøpe nytt. (Har du i løpet av de siste 12 månedene gjort noe av det følgend             |         |                   |
| Verdi                                                                                                                                | Merkelapp                                                                                                                        | Enheter | Prosent           |
| 0                                                                                                                                    |                                                                                                                                  | 832     | <div></div> 17.7% |
| 1                                                                                                                                    | Handlet gjenbruksprodukter heller enn å kjøpe nytt.                                                                              | 348     | <div></div> 7.4%  |
| 97                                                                                                                                   | Ikke svart                                                                                                                       | 23      | <div></div> 0.5%  |
| 98                                                                                                                                   | Ikke spurt                                                                                                                       | 3486    | <div></div> 74.3% |
| Advarsel: disse tallene indikerer antall enheter (cases) i datafilen. De kan ikke tolkes som oppsummert statistikk for populasjonen. |                                                                                                                                  |         |                   |
| # r7pad2_8: Gjort det siste året for å endre samfunnet: Deltatt i protestaksjoner mot varemerker/forretninger                        |                                                                                                                                  |         |                   |
| Informasjon                                                                                                                          | [Type= diskret] [Format=numeric] [Rekkevidde= 1-1] [Missing=*]                                                                   |         |                   |
| Statistikk [NW/ W]                                                                                                                   | [Gyldige=4689 /-] [Ugyldig=0 /-]                                                                                                 |         |                   |
| Tekst før spørsmål                                                                                                                   | Har du i løpet av de siste 12 månedene gjort noe av det følgende i et forsøk på å endre forhold i samfunnet<br>Flere svar mulig. |         |                   |
| Spørsmålstekst                                                                                                                       | Deltatt i aksjoner i protest mot bestemte varemerker eller forretninger.                                                         |         |                   |
| Instruksjoner til intervjueren                                                                                                       | [Spurt hvis u=4. ]                                                                                                               |         |                   |
| Kommentarer                                                                                                                          | Deltatt i aksjoner i protest mot bestemte varemerker eller forretninger. (Har du i løpet av de siste 12 månedene gjort           |         |                   |
| Verdi                                                                                                                                | Merkelapp                                                                                                                        | Enheter | Prosent           |
| 0                                                                                                                                    |                                                                                                                                  | 1160    | <div></div> 24.7% |
| 1                                                                                                                                    | Deltatt i aksjoner i protest mot bestemte varemerker eller forretninger.                                                         | 20      | <div></div> 0.4%  |
| 97                                                                                                                                   | Ikke svart                                                                                                                       | 23      | <div></div> 0.5%  |
| 98                                                                                                                                   | Ikke spurt                                                                                                                       | 3486    | <div></div> 74.3% |
| Advarsel: disse tallene indikerer antall enheter (cases) i datafilen. De kan ikke tolkes som oppsummert statistikk for populasjonen. |                                                                                                                                  |         |                   |
| # r7pad2_9: Gjort det siste året for å endre samfunnet: Investert i selskap med sosial profil du støtter                             |                                                                                                                                  |         |                   |
| Informasjon                                                                                                                          | [Type= diskret] [Format=numeric] [Rekkevidde= 1-1] [Missing=*]                                                                   |         |                   |
| Statistikk [NW/ W]                                                                                                                   | [Gyldige=4689 /-] [Ugyldig=0 /-]                                                                                                 |         |                   |
| Tekst før spørsmål                                                                                                                   | Har du i løpet av de siste 12 månedene gjort noe av det følgende i et forsøk på å endre forhold i samfunnet<br>Flere svar mulig. |         |                   |
| Spørsmålstekst                                                                                                                       | Investert i selskaper som har en sosial profil som du støtter.                                                                   |         |                   |
| Instruksjoner til intervjueren                                                                                                       | [Spurt hvis u=4. ]                                                                                                               |         |                   |
| Kommentarer                                                                                                                          | Investert i selskaper som har en sosial profil som du støtter. (Har du i løpet av de siste 12 månedene gjort noe av de           |         |                   |
| Verdi                                                                                                                                | Merkelapp                                                                                                                        | Enheter | Prosent           |
| 0                                                                                                                                    |                                                                                                                                  | 1129    | <div></div> 24.1% |
| 1                                                                                                                                    | Investert i selskaper som har en sosial profil som du støtter.                                                                   | 51      | <div></div> 1.1%  |
| 97                                                                                                                                   | Ikke svart                                                                                                                       | 23      | <div></div> 0.5%  |
| 98                                                                                                                                   | Ikke spurt                                                                                                                       | 3486    | <div></div> 74.3% |
| Advarsel: disse tallene indikerer antall enheter (cases) i datafilen. De kan ikke tolkes som oppsummert statistikk for populasjonen. |                                                                                                                                  |         |                   |

| # r7pad3_1: Påstand: Politikere ikke i stand til å gjøre noe med samfunnsproblemer, hver enkelt må gjøre sitt                        |                                                                                                                          |         |             |       |
|--------------------------------------------------------------------------------------------------------------------------------------|--------------------------------------------------------------------------------------------------------------------------|---------|-------------|-------|
| Informasjon                                                                                                                          | [Type= diskret] [Format=numeric] [Rekkevidde= 1-7] [Missing=*]                                                           |         |             |       |
| Statistikk [NW/ W]                                                                                                                   | [Gyldige=4689 /-] [Ugyldig=0 /-]                                                                                         |         |             |       |
| Tekst før spørsmål                                                                                                                   | I hvilken grad er du enig eller uenig i følgende påstander                                                               |         |             |       |
| Spørsmålstekst                                                                                                                       | Siden politikerne ikke er i stand til å gjøre noe med samfunnsproblemene, må hver enkelt gjøre sitt.                     |         |             |       |
| Instruksjoner til intervjueren                                                                                                       | [Spurt hvis u=4. ]                                                                                                       |         |             |       |
| Kommentarer                                                                                                                          | Siden politikerne ikke er i stand til å gjøre noe med samfunnsproblemene, må hver enkelt gjøre sitt. (I hvilken grad     |         |             |       |
| Verdi                                                                                                                                | Merkelapp                                                                                                                | Enheter | Prosent     |       |
| 1                                                                                                                                    | Svært enig                                                                                                               | 33      | <div></div> | 0.7%  |
| 2                                                                                                                                    | Enig                                                                                                                     | 193     | <div></div> | 4.1%  |
| 3                                                                                                                                    | Noe enig                                                                                                                 | 363     | <div></div> | 7.7%  |
| 4                                                                                                                                    | Verken enig eller uenig                                                                                                  | 242     | <div></div> | 5.2%  |
| 5                                                                                                                                    | Noe uenig                                                                                                                | 111     | <div></div> | 2.4%  |
| 6                                                                                                                                    | Uenig                                                                                                                    | 179     | <div></div> | 3.8%  |
| 7                                                                                                                                    | Svært uenig                                                                                                              | 39      | <div></div> | 0.8%  |
| 97                                                                                                                                   | Ikke svart                                                                                                               | 43      | <div></div> | 0.9%  |
| 98                                                                                                                                   | Ikke spurt                                                                                                               | 3486    | <div></div> | 74.3% |
| Advarsel: disse tallene indikerer antall enheter (cases) i datafilen. De kan ikke tolkes som oppsummert statistikk for populasjonen. |                                                                                                                          |         |             |       |
| # r7pad3_2: Påstand: Politikernes ansvar at vi lever i bærekraftig samfunn                                                           |                                                                                                                          |         |             |       |
| Informasjon                                                                                                                          | [Type= diskret] [Format=numeric] [Rekkevidde= 1-7] [Missing=*]                                                           |         |             |       |
| Statistikk [NW/ W]                                                                                                                   | [Gyldige=4689 /-] [Ugyldig=0 /-]                                                                                         |         |             |       |
| Tekst før spørsmål                                                                                                                   | I hvilken grad er du enig eller uenig i følgende påstander                                                               |         |             |       |
| Spørsmålstekst                                                                                                                       | Det er politikerne og ikke enkeltindividers ansvar at samfunnet vi lever i er bærekraftig.                               |         |             |       |
| Instruksjoner til intervjueren                                                                                                       | [Spurt hvis u=4. ]                                                                                                       |         |             |       |
| Kommentarer                                                                                                                          | Det er politikerne og ikke enkeltindividers ansvar at samfunnet vi lever i er bærekraftig. (I hvilken grad er du enig el |         |             |       |
| Verdi                                                                                                                                | Merkelapp                                                                                                                | Enheter | Prosent     |       |
| 1                                                                                                                                    | Svært enig                                                                                                               | 31      | <div></div> | 0.7%  |
| 2                                                                                                                                    | Enig                                                                                                                     | 124     | <div></div> | 2.6%  |
| 3                                                                                                                                    | Noe enig                                                                                                                 | 244     | <div></div> | 5.2%  |
| 4                                                                                                                                    | Verken enig eller uenig                                                                                                  | 154     | <div></div> | 3.3%  |
| 5                                                                                                                                    | Noe uenig                                                                                                                | 290     | <div></div> | 6.2%  |
| 6                                                                                                                                    | Uenig                                                                                                                    | 260     | <div></div> | 5.5%  |
| 7                                                                                                                                    | Svært uenig                                                                                                              | 58      | <div></div> | 1.2%  |
| 97                                                                                                                                   | Ikke svart                                                                                                               | 42      | <div></div> | 0.9%  |
| 98                                                                                                                                   | Ikke spurt                                                                                                               | 3486    | <div></div> | 74.3% |
| Advarsel: disse tallene indikerer antall enheter (cases) i datafilen. De kan ikke tolkes som oppsummert statistikk for populasjonen. |                                                                                                                          |         |             |       |

| # r7pad3_3: Påstand: Hver enkelts valg kan endre samfunnsutviklingen                                                                 |                                                                                                                          |         |                        |       |
|--------------------------------------------------------------------------------------------------------------------------------------|--------------------------------------------------------------------------------------------------------------------------|---------|------------------------|-------|
| Informasjon                                                                                                                          | [Type= diskret] [Format=numeric] [Rekkevidde= 1-7] [Missing=*]                                                           |         |                        |       |
| Statistikk [NW/ W]                                                                                                                   | [Gyldige=4689 /-] [Ugyldig=0 /-]                                                                                         |         |                        |       |
| Tekst før spørsmål                                                                                                                   | I hvilken grad er du enig eller uenig i følgende påstander                                                               |         |                        |       |
| Spørsmålstekst                                                                                                                       | Ved at hver enkelt tar bevisste valg i hverdagen, er det mulig å endre samfunnsutviklingen.                              |         |                        |       |
| Instruksjoner til intervjueren                                                                                                       | [Spurt hvis u=4. ]                                                                                                       |         |                        |       |
| Kommentarer                                                                                                                          | Ved at hver enkelt tar bevisste valg i hverdagen, er det mulig å endre samfunnsutviklingen. (I hvilken grad er du enig e |         |                        |       |
| Verdi                                                                                                                                | Merkelapp                                                                                                                | Enheter | Prosent                |       |
| 1                                                                                                                                    | Svært enig                                                                                                               | 120     | <div><div></div></div> | 2.6%  |
| 2                                                                                                                                    | Enig                                                                                                                     | 521     | <div><div></div></div> | 11.1% |
| 3                                                                                                                                    | Noe enig                                                                                                                 | 366     | <div><div></div></div> | 7.8%  |
| 4                                                                                                                                    | Verken enig eller uenig                                                                                                  | 93      | <div><div></div></div> | 2.0%  |
| 5                                                                                                                                    | Noe uenig                                                                                                                | 39      | <div><div></div></div> | 0.8%  |
| 6                                                                                                                                    | Uenig                                                                                                                    | 14      | <div><div></div></div> | 0.3%  |
| 7                                                                                                                                    | Svært uenig                                                                                                              | 9       | <div><div></div></div> | 0.2%  |
| 97                                                                                                                                   | Ikke svart                                                                                                               | 41      | <div><div></div></div> | 0.9%  |
| 98                                                                                                                                   | Ikke spurt                                                                                                               | 3486    | <div><div></div></div> | 74.3% |
| Advarsel: disse tallene indikerer antall enheter (cases) i datafilen. De kan ikke tolkes som oppsummert statistikk for populasjonen. |                                                                                                                          |         |                        |       |
| # r7pad3_4: Påstand: Naivt å tro at globale samfunnsproblem kan løses av enkeltindivers livsstilsvalg                                |                                                                                                                          |         |                        |       |
| Informasjon                                                                                                                          | [Type= diskret] [Format=numeric] [Rekkevidde= 1-7] [Missing=*]                                                           |         |                        |       |
| Statistikk [NW/ W]                                                                                                                   | [Gyldige=4689 /-] [Ugyldig=0 /-]                                                                                         |         |                        |       |
| Tekst før spørsmål                                                                                                                   | I hvilken grad er du enig eller uenig i følgende påstander                                                               |         |                        |       |
| Spørsmålstekst                                                                                                                       | Det er naivt å tro at store, globale samfunnsutfordringer kan løses gjennom enkeltindivers livsstilsvalg.                |         |                        |       |
| Instruksjoner til intervjueren                                                                                                       | [Spurt hvis u=4. ]                                                                                                       |         |                        |       |
| Kommentarer                                                                                                                          | Det er naivt å tro at store, globale samfunnsutfordringer kan løses gjennom enkeltindivers livsstilsvalg. (I hvilken     |         |                        |       |
| Verdi                                                                                                                                | Merkelapp                                                                                                                | Enheter | Prosent                |       |
| 1                                                                                                                                    | Svært enig                                                                                                               | 52      | <div><div></div></div> | 1.1%  |
| 2                                                                                                                                    | Enig                                                                                                                     | 175     | <div><div></div></div> | 3.7%  |
| 3                                                                                                                                    | Noe enig                                                                                                                 | 258     | <div><div></div></div> | 5.5%  |
| 4                                                                                                                                    | Verken enig eller uenig                                                                                                  | 153     | <div><div></div></div> | 3.3%  |
| 5                                                                                                                                    | Noe uenig                                                                                                                | 272     | <div><div></div></div> | 5.8%  |
| 6                                                                                                                                    | Uenig                                                                                                                    | 194     | <div><div></div></div> | 4.1%  |
| 7                                                                                                                                    | Svært uenig                                                                                                              | 50      | <div><div></div></div> | 1.1%  |
| 97                                                                                                                                   | Ikke svart                                                                                                               | 49      | <div><div></div></div> | 1.0%  |
| 98                                                                                                                                   | Ikke spurt                                                                                                               | 3486    | <div><div></div></div> | 74.3% |
| Advarsel: disse tallene indikerer antall enheter (cases) i datafilen. De kan ikke tolkes som oppsummert statistikk for populasjonen. |                                                                                                                          |         |                        |       |
| # r7ran8: [Randomiserer hvis u=4. ]                                                                                                  |                                                                                                                          |         |                        |       |
| Informasjon                                                                                                                          | [Type= diskret] [Format=numeric] [Rekkevidde= 1-5] [Missing=*]                                                           |         |                        |       |
| Statistikk [NW/ W]                                                                                                                   | [Gyldige=1176 /-] [Ugyldig=3513 /-]                                                                                      |         |                        |       |
| Instruksjoner til intervjueren                                                                                                       | [Randomiserer hvis u=4. ]                                                                                                |         |                        |       |
| Verdi                                                                                                                                | Merkelapp                                                                                                                | Enheter | Prosent                |       |
| 1                                                                                                                                    | 1                                                                                                                        | 232     | <div><div></div></div> | 19.7% |

| # r7ran8: [Randomiserer hvis u=4. ]                                                                                                  |                                                                                                                        |         |             |       |
|--------------------------------------------------------------------------------------------------------------------------------------|------------------------------------------------------------------------------------------------------------------------|---------|-------------|-------|
| Verdi                                                                                                                                | Merkelapp                                                                                                              | Enheter | Prosent     |       |
| 2                                                                                                                                    | 2                                                                                                                      | 241     | <div></div> | 20.5% |
| 3                                                                                                                                    | 3                                                                                                                      | 239     | <div></div> | 20.3% |
| 4                                                                                                                                    | 4                                                                                                                      | 240     | <div></div> | 20.4% |
| 5                                                                                                                                    | 5                                                                                                                      | 224     | <div></div> | 19.0% |
| Sysmiss                                                                                                                              |                                                                                                                        | 3513    |             |       |
| Advarsel: disse tallene indikerer antall enheter (cases) i datafilen. De kan ikke tolkes som oppsummert statistikk for populasjonen. |                                                                                                                        |         |             |       |
| # r7dvex2_1: Bør parti forbys: Avskaffe all oljeproduksjon                                                                           |                                                                                                                        |         |             |       |
| Informasjon                                                                                                                          | [Type= diskret] [Format=numeric] [Rekkevidde= 1-2] [Missing=*]                                                         |         |             |       |
| Statistikk [NW/ W]                                                                                                                   | [Gyldige=4689 /-] [Ugyldig=0 /-]                                                                                       |         |             |       |
| Tekst før spørsmål                                                                                                                   | Forestill deg at et politisk parti ønsker å endre Norge radikalt ved å avskaffe all oljeproduksjon ved norskekysten.   |         |             |       |
| Spørsmålstekst                                                                                                                       | Slik du ser det, bør et slikt parti forbys?                                                                            |         |             |       |
| Instruksjoner til intervjueren                                                                                                       | [Spurt hvis u=4 og ran8=1. ]                                                                                           |         |             |       |
| Kommentarer                                                                                                                          | Forestill deg at et politisk parti ønsker å endre Norge radikalt ved å avskaffe all oljeproduksjon ved norskekysten.SI |         |             |       |
| Verdi                                                                                                                                | Merkelapp                                                                                                              | Enheter | Prosent     |       |
| 1                                                                                                                                    | Ja                                                                                                                     | 51      | <div></div> | 1.1%  |
| 2                                                                                                                                    | Nei                                                                                                                    | 176     | <div></div> | 3.8%  |
| 97                                                                                                                                   | Ikke svart                                                                                                             | 5       | <div></div> | 0.1%  |
| 98                                                                                                                                   | Ikke spurt                                                                                                             | 4457    | <div></div> | 95.1% |
| Advarsel: disse tallene indikerer antall enheter (cases) i datafilen. De kan ikke tolkes som oppsummert statistikk for populasjonen. |                                                                                                                        |         |             |       |
| # r7dvex2_2: Bør parti forbys: Avskaffe frie, rettferdige valg                                                                       |                                                                                                                        |         |             |       |
| Informasjon                                                                                                                          | [Type= diskret] [Format=numeric] [Rekkevidde= 1-2] [Missing=*]                                                         |         |             |       |
| Statistikk [NW/ W]                                                                                                                   | [Gyldige=4689 /-] [Ugyldig=0 /-]                                                                                       |         |             |       |
| Tekst før spørsmål                                                                                                                   | Forestill deg at et politisk parti ønsker å endre Norge radikalt ved å avskaffe frie og rettferdige valg.              |         |             |       |
| Spørsmålstekst                                                                                                                       | Slik du ser det, bør et slikt parti forbys?                                                                            |         |             |       |
| Instruksjoner til intervjueren                                                                                                       | [Spurt hvis u=4 og ran8=2. ]                                                                                           |         |             |       |
| Kommentarer                                                                                                                          | Forestill deg at et politisk parti ønsker å endre Norge radikalt ved å avskaffe frie og rettferdige valg. Slik du ser  |         |             |       |
| Verdi                                                                                                                                | Merkelapp                                                                                                              | Enheter | Prosent     |       |
| 1                                                                                                                                    | Ja                                                                                                                     | 175     | <div></div> | 3.7%  |
| 2                                                                                                                                    | Nei                                                                                                                    | 61      | <div></div> | 1.3%  |
| 97                                                                                                                                   | Ikke svart                                                                                                             | 5       | <div></div> | 0.1%  |
| 98                                                                                                                                   | Ikke spurt                                                                                                             | 4448    | <div></div> | 94.9% |
| Advarsel: disse tallene indikerer antall enheter (cases) i datafilen. De kan ikke tolkes som oppsummert statistikk for populasjonen. |                                                                                                                        |         |             |       |
| # r7dvex2_3: Bør parti forbys: Avskaffe pressefriheten                                                                               |                                                                                                                        |         |             |       |
| Informasjon                                                                                                                          | [Type= diskret] [Format=numeric] [Rekkevidde= 1-2] [Missing=*]                                                         |         |             |       |
| Statistikk [NW/ W]                                                                                                                   | [Gyldige=4689 /-] [Ugyldig=0 /-]                                                                                       |         |             |       |
| Tekst før spørsmål                                                                                                                   | Forestill deg at et politisk parti ønsker å endre Norge radikalt ved å avskaffe pressefriheten.                        |         |             |       |
| Spørsmålstekst                                                                                                                       | Slik du ser det, bør et slikt parti forbys?                                                                            |         |             |       |
| Instruksjoner til intervjueren                                                                                                       | [Spurt hvis u=4 og ran8=3. ]                                                                                           |         |             |       |
| Kommentarer                                                                                                                          | Forestill deg at et politisk parti ønsker å endre Norge radikalt ved å avskaffe pressefriheten. Slik du ser det, bør   |         |             |       |

| # r7dvex2_3: Bør parti forbys: Avskaffe pressefriheten                                                                               |                                                                                                                                        |         |                              |
|--------------------------------------------------------------------------------------------------------------------------------------|----------------------------------------------------------------------------------------------------------------------------------------|---------|------------------------------|
| Verdi                                                                                                                                | Merkelapp                                                                                                                              | Enheter | Prosent                      |
| 1                                                                                                                                    | Ja                                                                                                                                     | 160     | <div><div></div></div> 3.4%  |
| 2                                                                                                                                    | Nei                                                                                                                                    | 75      | <div><div></div></div> 1.6%  |
| 97                                                                                                                                   | Ikke svart                                                                                                                             | 4       | <div><div></div></div> 0.1%  |
| 98                                                                                                                                   | Ikke spurt                                                                                                                             | 4450    | <div><div></div></div> 94.9% |
| Advarsel: disse tallene indikerer antall enheter (cases) i datafilen. De kan ikke tolkes som oppsummert statistikk for populasjonen. |                                                                                                                                        |         |                              |
| # r7dvex2_4: Bør parti forbys: Avskaffe tilslutning til Menneskerettighetskonvensjonen                                               |                                                                                                                                        |         |                              |
| Informasjon                                                                                                                          | [Type= diskret] [Format=numeric] [Rekkevidde= 1-2] [Missing=*]                                                                         |         |                              |
| Statistikk [NW/ W]                                                                                                                   | [Gyldige=4689 /-] [Ugyldig=0 /-]                                                                                                       |         |                              |
| Tekst før spørsmål                                                                                                                   | Forestill deg at et politisk parti ønsker å endre Norge radikalt ved å avskaffe Norges tilslutning til Menneskerettighetskonvensjonen. |         |                              |
| Spørsmålstekst                                                                                                                       | Slik du ser det, bør et slikt parti forbys?                                                                                            |         |                              |
| Instruksjoner til intervjueren                                                                                                       | [Spurt hvis u=4 og ran8=4. ]                                                                                                           |         |                              |
| Kommentarer                                                                                                                          | Forestill deg at et politisk parti ønsker å endre Norge radikalt ved å avskaffe Norges tilslutning til Menneskerettigh                 |         |                              |
| Verdi                                                                                                                                | Merkelapp                                                                                                                              | Enheter | Prosent                      |
| 1                                                                                                                                    | Ja                                                                                                                                     | 122     | <div><div></div></div> 2.6%  |
| 2                                                                                                                                    | Nei                                                                                                                                    | 110     | <div><div></div></div> 2.3%  |
| 97                                                                                                                                   | Ikke svart                                                                                                                             | 8       | <div><div></div></div> 0.2%  |
| 98                                                                                                                                   | Ikke spurt                                                                                                                             | 4449    | <div><div></div></div> 94.9% |
| Advarsel: disse tallene indikerer antall enheter (cases) i datafilen. De kan ikke tolkes som oppsummert statistikk for populasjonen. |                                                                                                                                        |         |                              |
| # r7dvex2_5: Bør parti forbys: Avskaffe minoriteters rettigheter                                                                     |                                                                                                                                        |         |                              |
| Informasjon                                                                                                                          | [Type= diskret] [Format=numeric] [Rekkevidde= 1-2] [Missing=*]                                                                         |         |                              |
| Statistikk [NW/ W]                                                                                                                   | [Gyldige=4689 /-] [Ugyldig=0 /-]                                                                                                       |         |                              |
| Tekst før spørsmål                                                                                                                   | Forestill deg at et politisk parti ønsker å endre Norge radikalt ved å avskaffe minoriteters rettigheter.                              |         |                              |
| Spørsmålstekst                                                                                                                       | Slik du ser det, bør et slikt parti forbys?                                                                                            |         |                              |
| Instruksjoner til intervjueren                                                                                                       | [Spurt hvis u=4 og ran8=5. ]                                                                                                           |         |                              |
| Kommentarer                                                                                                                          | Forestill deg at et politisk parti ønsker å endre Norge radikalt ved å avskaffe minoriteters rettigheter.Slik du ser d                 |         |                              |
| Verdi                                                                                                                                | Merkelapp                                                                                                                              | Enheter | Prosent                      |
| 1                                                                                                                                    | Ja                                                                                                                                     | 120     | <div><div></div></div> 2.6%  |
| 2                                                                                                                                    | Nei                                                                                                                                    | 101     | <div><div></div></div> 2.2%  |
| 97                                                                                                                                   | Ikke svart                                                                                                                             | 3       | <div><div></div></div> 0.1%  |
| 98                                                                                                                                   | Ikke spurt                                                                                                                             | 4465    | <div><div></div></div> 95.2% |
| Advarsel: disse tallene indikerer antall enheter (cases) i datafilen. De kan ikke tolkes som oppsummert statistikk for populasjonen. |                                                                                                                                        |         |                              |
| # r7ran9: [Randomiserer hvis u=4. ]                                                                                                  |                                                                                                                                        |         |                              |
| Informasjon                                                                                                                          | [Type= diskret] [Format=numeric] [Rekkevidde= 1-4] [Missing=*]                                                                         |         |                              |
| Statistikk [NW/ W]                                                                                                                   | [Gyldige=1176 /-] [Ugyldig=3513 /-]                                                                                                    |         |                              |
| Instruksjoner til intervjueren                                                                                                       | [Randomiserer hvis u=4. ]                                                                                                              |         |                              |
| Verdi                                                                                                                                | Merkelapp                                                                                                                              | Enheter | Prosent                      |
| 1                                                                                                                                    | 1                                                                                                                                      | 282     | <div><div></div></div> 24.0% |
| 2                                                                                                                                    | 2                                                                                                                                      | 302     | <div><div></div></div> 25.7% |
| 3                                                                                                                                    | 3                                                                                                                                      | 313     | <div><div></div></div> 26.6% |

| # r7ran9: [Randomiserer hvis u=4. ]                                                                                                  |                                                                                                                                                                 |         |                              |
|--------------------------------------------------------------------------------------------------------------------------------------|-----------------------------------------------------------------------------------------------------------------------------------------------------------------|---------|------------------------------|
| Verdi                                                                                                                                | Merkelapp                                                                                                                                                       | Enheter | Prosent                      |
| 4                                                                                                                                    | 4                                                                                                                                                               | 279     | <div><div></div></div> 23.7% |
| Sysmiss                                                                                                                              |                                                                                                                                                                 | 3513    |                              |
| Advarsel: disse tallene indikerer antall enheter (cases) i datafilen. De kan ikke tolkes som oppsummert statistikk for populasjonen. |                                                                                                                                                                 |         |                              |
| # r7dvg_1: Påstand: Trolig at de som oppgir legning som grunn for å søke asyl snakker sant                                           |                                                                                                                                                                 |         |                              |
| Informasjon                                                                                                                          | [Type= diskret] [Format=numeric] [Rekkevidde= 1-7] [Missing=*]                                                                                                  |         |                              |
| Statistikk [NW/ W]                                                                                                                   | [Gyldige=4689 /-] [Ugyldig=0 /-]                                                                                                                                |         |                              |
| Tekst før spørsmål                                                                                                                   | Hvor enig eller uenig er du i følgende påstand:                                                                                                                 |         |                              |
| Spørsmålstekst                                                                                                                       | Det er grunn til å tro at de fleste snakker sant når de oppgir seksuell orientering (legning) som årsak til at de har forlatt hjemlandet og søker asyl i Norge. |         |                              |
| Instruksjoner til intervjueren                                                                                                       | [Spurt hvis u=4 og ran9=1. ]                                                                                                                                    |         |                              |
| Kommentarer                                                                                                                          | Hvor enig eller uenig er du i følgende påstand: Det er grunn til å tro at de fleste snakker sant når de oppgir seksue                                           |         |                              |
| Verdi                                                                                                                                | Merkelapp                                                                                                                                                       | Enheter | Prosent                      |
| 1                                                                                                                                    | Svært enig                                                                                                                                                      | 7       | <div><div></div></div> 0.1%  |
| 2                                                                                                                                    | Enig                                                                                                                                                            | 39      | <div><div></div></div> 0.8%  |
| 3                                                                                                                                    | Noe enig                                                                                                                                                        | 52      | <div><div></div></div> 1.1%  |
| 4                                                                                                                                    | Verken enig eller uenig                                                                                                                                         | 104     | <div><div></div></div> 2.2%  |
| 5                                                                                                                                    | Noe uenig                                                                                                                                                       | 33      | <div><div></div></div> 0.7%  |
| 6                                                                                                                                    | Uenig                                                                                                                                                           | 31      | <div><div></div></div> 0.7%  |
| 7                                                                                                                                    | Svært uenig                                                                                                                                                     | 13      | <div><div></div></div> 0.3%  |
| 97                                                                                                                                   | Ikke svart                                                                                                                                                      | 3       | <div><div></div></div> 0.1%  |
| 98                                                                                                                                   | Ikke spurt                                                                                                                                                      | 4407    | <div><div></div></div> 94.0% |
| Advarsel: disse tallene indikerer antall enheter (cases) i datafilen. De kan ikke tolkes som oppsummert statistikk for populasjonen. |                                                                                                                                                                 |         |                              |
| # r7dvg_2: Påstand: Trolig at asylsøkers årsak til å søke asyl er sann                                                               |                                                                                                                                                                 |         |                              |
| Informasjon                                                                                                                          | [Type= diskret] [Format=numeric] [Rekkevidde= 1-7] [Missing=*]                                                                                                  |         |                              |
| Statistikk [NW/ W]                                                                                                                   | [Gyldige=4689 /-] [Ugyldig=0 /-]                                                                                                                                |         |                              |
| Tekst før spørsmål                                                                                                                   | Hvor enig eller uenig er du i følgende påstand:                                                                                                                 |         |                              |
| Spørsmålstekst                                                                                                                       | Det er grunn til å tro at de fleste snakker sant om årsaken til at de har forlatt hjemlandet og søker asyl i Norge.                                             |         |                              |
| Instruksjoner til intervjueren                                                                                                       | [Spurt hvis u=4 og ran9=2. ]                                                                                                                                    |         |                              |
| Kommentarer                                                                                                                          | Hvor enig eller uenig er du i følgende påstand: Det er grunn til å tro at de fleste snakker sant om årsaken til at de                                           |         |                              |
| Verdi                                                                                                                                | Merkelapp                                                                                                                                                       | Enheter | Prosent                      |
| 1                                                                                                                                    | Svært enig                                                                                                                                                      | 8       | <div><div></div></div> 0.2%  |
| 2                                                                                                                                    | Enig                                                                                                                                                            | 68      | <div><div></div></div> 1.5%  |
| 3                                                                                                                                    | Noe enig                                                                                                                                                        | 74      | <div><div></div></div> 1.6%  |
| 4                                                                                                                                    | Verken enig eller uenig                                                                                                                                         | 48      | <div><div></div></div> 1.0%  |
| 5                                                                                                                                    | Noe uenig                                                                                                                                                       | 59      | <div><div></div></div> 1.3%  |
| 6                                                                                                                                    | Uenig                                                                                                                                                           | 29      | <div><div></div></div> 0.6%  |
| 7                                                                                                                                    | Svært uenig                                                                                                                                                     | 13      | <div><div></div></div> 0.3%  |
| 97                                                                                                                                   | Ikke svart                                                                                                                                                      | 3       | <div><div></div></div> 0.1%  |
| 98                                                                                                                                   | Ikke spurt                                                                                                                                                      | 4387    | <div><div></div></div> 93.6% |
| Advarsel: disse tallene indikerer antall enheter (cases) i datafilen. De kan ikke tolkes som oppsummert statistikk for populasjonen. |                                                                                                                                                                 |         |                              |



| # r7dvg_3: Påstand: Trolig at de som oppgir konvertering til ny religion som grunn for å søke asyl snakker sant                      |                         |                                                                                                                                                                  |         |  |
|--------------------------------------------------------------------------------------------------------------------------------------|-------------------------|------------------------------------------------------------------------------------------------------------------------------------------------------------------|---------|--|
| Informasjon                                                                                                                          |                         | [Type= diskret] [Format=numeric] [Rekkevidde= 1-7] [Missing=*]                                                                                                   |         |  |
| Statistikk [NW/ W]                                                                                                                   |                         | [Gyldige=4689 /-] [Ugyldig=0 /-]                                                                                                                                 |         |  |
| Tekst før spørsmål                                                                                                                   |                         | Hvor enig eller uenig er du i følgende påstand:                                                                                                                  |         |  |
| Spørsmålstekst                                                                                                                       |                         | Det er grunn til å tro at de fleste snakker sant når de oppgir konvertering til en ny religion som årsak til at de har forlatt hjemlandet og søker asyl i Norge. |         |  |
| Instruksjoner til intervjueren                                                                                                       |                         | [Spurt hvis u=4 og ran9=3. ]                                                                                                                                     |         |  |
| Kommentarer                                                                                                                          |                         | Hvor enig eller uenig er du i følgende påstand: Det er grunn til å tro at de fleste snakker sant når de oppgir konver                                            |         |  |
| Verdi                                                                                                                                | Merkelapp               | Enheter                                                                                                                                                          | Prosent |  |
| 1                                                                                                                                    | Svært enig              | 3                                                                                                                                                                | 0.1%    |  |
| 2                                                                                                                                    | Enig                    | 27                                                                                                                                                               | 0.6%    |  |
| 3                                                                                                                                    | Noe enig                | 52                                                                                                                                                               | 1.1%    |  |
| 4                                                                                                                                    | Verken enig eller uenig | 106                                                                                                                                                              | 2.3%    |  |
| 5                                                                                                                                    | Noe uenig               | 50                                                                                                                                                               | 1.1%    |  |
| 6                                                                                                                                    | Uenig                   | 56                                                                                                                                                               | 1.2%    |  |
| 7                                                                                                                                    | Svært uenig             | 16                                                                                                                                                               | 0.3%    |  |
| 97                                                                                                                                   | Ikke svart              | 3                                                                                                                                                                | 0.1%    |  |
| 98                                                                                                                                   | Ikke spurt              | 4376                                                                                                                                                             | 93.3%   |  |
| Advarsel: disse tallene indikerer antall enheter (cases) i datafilen. De kan ikke tolkes som oppsummert statistikk for populasjonen. |                         |                                                                                                                                                                  |         |  |
| # r7dvg_4: Påstand: Trolig at asylsøker snakker sant når de oppgir at de er mindreårige                                              |                         |                                                                                                                                                                  |         |  |
| Informasjon                                                                                                                          |                         | [Type= diskret] [Format=numeric] [Rekkevidde= 1-7] [Missing=*]                                                                                                   |         |  |
| Statistikk [NW/ W]                                                                                                                   |                         | [Gyldige=4689 /-] [Ugyldig=0 /-]                                                                                                                                 |         |  |
| Tekst før spørsmål                                                                                                                   |                         | Hvor enig eller uenig er du i følgende påstand:                                                                                                                  |         |  |
| Spørsmålstekst                                                                                                                       |                         | Det er grunn til å tro at de fleste snakker sant når de oppgir at de er mindreårige når de søker asyl i Norge.                                                   |         |  |
| Instruksjoner til intervjueren                                                                                                       |                         | [Spurt hvis u=4 og ran9=4. ]                                                                                                                                     |         |  |
| Kommentarer                                                                                                                          |                         | Hvor enig eller uenig er du i følgende påstand: Det er grunn til å tro at de fleste snakker sant når de oppgir at de                                             |         |  |
| Verdi                                                                                                                                | Merkelapp               | Enheter                                                                                                                                                          | Prosent |  |
| 1                                                                                                                                    | Svært enig              | 4                                                                                                                                                                | 0.1%    |  |
| 2                                                                                                                                    | Enig                    | 36                                                                                                                                                               | 0.8%    |  |
| 3                                                                                                                                    | Noe enig                | 44                                                                                                                                                               | 0.9%    |  |
| 4                                                                                                                                    | Verken enig eller uenig | 69                                                                                                                                                               | 1.5%    |  |
| 5                                                                                                                                    | Noe uenig               | 65                                                                                                                                                               | 1.4%    |  |
| 6                                                                                                                                    | Uenig                   | 36                                                                                                                                                               | 0.8%    |  |
| 7                                                                                                                                    | Svært uenig             | 23                                                                                                                                                               | 0.5%    |  |
| 97                                                                                                                                   | Ikke svart              | 2                                                                                                                                                                | 0.0%    |  |
| 98                                                                                                                                   | Ikke spurt              | 4410                                                                                                                                                             | 94.0%   |  |
| Advarsel: disse tallene indikerer antall enheter (cases) i datafilen. De kan ikke tolkes som oppsummert statistikk for populasjonen. |                         |                                                                                                                                                                  |         |  |
| # r7ran10: [Randomiserer hvis u=4. ]                                                                                                 |                         |                                                                                                                                                                  |         |  |
| Informasjon                                                                                                                          |                         | [Type= diskret] [Format=numeric] [Rekkevidde= 1-7] [Missing=*]                                                                                                   |         |  |
| Statistikk [NW/ W]                                                                                                                   |                         | [Gyldige=1175 /-] [Ugyldig=3514 /-]                                                                                                                              |         |  |
| Instruksjoner til intervjueren                                                                                                       |                         | [Randomiserer hvis u=4. ]                                                                                                                                        |         |  |

| # r7ran10: [Randomiserer hvis u=4. ]                                                                                                 |                                                                                                                             |         |                   |
|--------------------------------------------------------------------------------------------------------------------------------------|-----------------------------------------------------------------------------------------------------------------------------|---------|-------------------|
| Verdi                                                                                                                                | Merkelapp                                                                                                                   | Enheter | Prosent           |
| 1                                                                                                                                    | 1                                                                                                                           | 182     | <div></div> 15.5% |
| 2                                                                                                                                    | 2                                                                                                                           | 164     | <div></div> 14.0% |
| 3                                                                                                                                    | 3                                                                                                                           | 170     | <div></div> 14.5% |
| 4                                                                                                                                    | 4                                                                                                                           | 160     | <div></div> 13.6% |
| 5                                                                                                                                    | 5                                                                                                                           | 184     | <div></div> 15.7% |
| 6                                                                                                                                    | 6                                                                                                                           | 166     | <div></div> 14.1% |
| 7                                                                                                                                    | 7                                                                                                                           | 149     | <div></div> 12.7% |
| Sysmiss                                                                                                                              |                                                                                                                             | 3514    |                   |
| Advarsel: disse tallene indikerer antall enheter (cases) i datafilen. De kan ikke tolkes som oppsummert statistikk for populasjonen. |                                                                                                                             |         |                   |
| # r7dvkost1: Innvandring hvor stor kostnad/gevinst for velferdsstaten?                                                               |                                                                                                                             |         |                   |
| Informasjon                                                                                                                          | [Type= diskret] [Format=numeric] [Rekkevidde= 1-7] [Missing=*]                                                              |         |                   |
| Statistikk [NW/ W]                                                                                                                   | [Gyldige=4689 /-] [Ugyldig=0 /-]                                                                                            |         |                   |
| Spørsmålstekst                                                                                                                       | Hvor stor kostnad eller gevinst vil du si at innvandring er for den norske velferdsstaten?                                  |         |                   |
| Instruksjoner til intervjueren                                                                                                       | [Spurt hvis u=4 og ran10=1. ]                                                                                               |         |                   |
| Kommentarer                                                                                                                          | Hvor stor kostnad eller gevinst vil du si at innvandring er for den norske velferdsstaten?                                  |         |                   |
| Verdi                                                                                                                                | Merkelapp                                                                                                                   | Enheter | Prosent           |
| 1                                                                                                                                    | Svært stor kostnad                                                                                                          | 15      | <div></div> 0.3%  |
| 2                                                                                                                                    | Stor kostnad                                                                                                                | 42      | <div></div> 0.9%  |
| 3                                                                                                                                    | En viss kostnad                                                                                                             | 54      | <div></div> 1.2%  |
| 4                                                                                                                                    | Verken en kostnad eller en gevinst                                                                                          | 13      | <div></div> 0.3%  |
| 5                                                                                                                                    | En viss gevinst                                                                                                             | 42      | <div></div> 0.9%  |
| 6                                                                                                                                    | Stor gevinst                                                                                                                | 14      | <div></div> 0.3%  |
| 7                                                                                                                                    | Svært stor gevinst                                                                                                          | 0       |                   |
| 97                                                                                                                                   | Ikke svart                                                                                                                  | 2       | <div></div> 0.0%  |
| 98                                                                                                                                   | Ikke spurt                                                                                                                  | 4507    | <div></div> 96.1% |
| Advarsel: disse tallene indikerer antall enheter (cases) i datafilen. De kan ikke tolkes som oppsummert statistikk for populasjonen. |                                                                                                                             |         |                   |
| # r7dvkost2: Innvandring hvor stor kostnad/gevinst for velferdsstaten? Arbeidsledighet 7%                                            |                                                                                                                             |         |                   |
| Informasjon                                                                                                                          | [Type= diskret] [Format=numeric] [Rekkevidde= 1-7] [Missing=*]                                                              |         |                   |
| Statistikk [NW/ W]                                                                                                                   | [Gyldige=4689 /-] [Ugyldig=0 /-]                                                                                            |         |                   |
| Tekst før spørsmål                                                                                                                   | Som du kanskje vet ligger arbeidsledigheten blant innvandrere i Norge på rundt 7%.                                          |         |                   |
| Spørsmålstekst                                                                                                                       | Hvis du tar dette i betraktning, hvor stor kostnad eller gevinst vil du si at innvandring er for den norske velferdsstaten? |         |                   |
| Instruksjoner til intervjueren                                                                                                       | [Spurt hvis u=4 og ran10=2. ]                                                                                               |         |                   |
| Kommentarer                                                                                                                          | Som du kanskje vet ligger arbeidsledigheten blant innvandrere i Norge på rundt 7%. Hvis du tar dette i betraktning, hvor    |         |                   |
| Verdi                                                                                                                                | Merkelapp                                                                                                                   | Enheter | Prosent           |
| 1                                                                                                                                    | Svært stor kostnad                                                                                                          | 22      | <div></div> 0.5%  |
| 2                                                                                                                                    | Stor kostnad                                                                                                                | 30      | <div></div> 0.6%  |
| 3                                                                                                                                    | En viss kostnad                                                                                                             | 48      | <div></div> 1.0%  |
| 4                                                                                                                                    | Verken en kostnad eller en gevinst                                                                                          | 21      | <div></div> 0.4%  |
| 5                                                                                                                                    | En viss gevinst                                                                                                             | 32      | <div></div> 0.7%  |
| 6                                                                                                                                    | Stor gevinst                                                                                                                | 8       | <div></div> 0.2%  |
| 7                                                                                                                                    | Svært stor gevinst                                                                                                          | 1       | <div></div> 0.0%  |

| # r7dvcost2: Innvandring hvor stor kostnad/gevinst for velferdsstaten? Arbeidsledighet 7%                                            |                                                                                                                           |         |         |
|--------------------------------------------------------------------------------------------------------------------------------------|---------------------------------------------------------------------------------------------------------------------------|---------|---------|
| Verdi                                                                                                                                | Merkelapp                                                                                                                 | Enheter | Prosent |
| 97                                                                                                                                   | Ikke svart                                                                                                                | 2       | 0.0%    |
| 98                                                                                                                                   | Ikke spurt                                                                                                                | 4525    | 96.5%   |
| Advarsel: disse tallene indikerer antall enheter (cases) i datafilen. De kan ikke tolkes som oppsummert statistikk for populasjonen. |                                                                                                                           |         |         |
| # r7dvcost3: Innvandring hvor stor kostnad/gevinst for velferdsstaten? Sysselsetting 60%                                             |                                                                                                                           |         |         |
| Informasjon                                                                                                                          | [Type= diskret] [Format=numeric] [Rekkevidde= 1-7] [Missing=*]                                                            |         |         |
| Statistikk [NW/ W]                                                                                                                   | [Gyldige=4689 /-] [Ugyldig=0 /-]                                                                                          |         |         |
| Tekst før spørsmål                                                                                                                   | Som du kanskje vet ligger sysselsettingen blant innvandrere i Norge på rundt 60%.                                         |         |         |
| Spørsmålstekst                                                                                                                       | Hvis du tar det i betraktning, hvor stor kostnad eller gevinst vil du si at innvandring er for den norske velferdsstaten? |         |         |
| Instruksjoner til intervjueren                                                                                                       | [Spurt hvis u=4 og ran10=3. ]                                                                                             |         |         |
| Kommentarer                                                                                                                          | Som du kanskje vet ligger sysselsettingen blant innvandrere i Norge på rundt 60%. Hvis du tar det i betraktning, hvor st  |         |         |
| Verdi                                                                                                                                | Merkelapp                                                                                                                 | Enheter | Prosent |
| 1                                                                                                                                    | Svært stor kostnad                                                                                                        | 15      | 0.3%    |
| 2                                                                                                                                    | Stor kostnad                                                                                                              | 45      | 1.0%    |
| 3                                                                                                                                    | En viss kostnad                                                                                                           | 58      | 1.2%    |
| 4                                                                                                                                    | Verken en kostnad eller en gevinst                                                                                        | 8       | 0.2%    |
| 5                                                                                                                                    | En viss gevinst                                                                                                           | 30      | 0.6%    |
| 6                                                                                                                                    | Stor gevinst                                                                                                              | 6       | 0.1%    |
| 7                                                                                                                                    | Svært stor gevinst                                                                                                        | 0       |         |
| 97                                                                                                                                   | Ikke svart                                                                                                                | 8       | 0.2%    |
| 98                                                                                                                                   | Ikke spurt                                                                                                                | 4519    | 96.4%   |
| Advarsel: disse tallene indikerer antall enheter (cases) i datafilen. De kan ikke tolkes som oppsummert statistikk for populasjonen. |                                                                                                                           |         |         |
| # r7dvcost4: Innvandring hvor stor kostnad/gevinst for velferdsstaten? Utgift                                                        |                                                                                                                           |         |         |
| Informasjon                                                                                                                          | [Type= diskret] [Format=numeric] [Rekkevidde= 1-7] [Missing=*]                                                            |         |         |
| Statistikk [NW/ W]                                                                                                                   | [Gyldige=4689 /-] [Ugyldig=0 /-]                                                                                          |         |         |
| Tekst før spørsmål                                                                                                                   | Som du kanskje vet fører arbeidsledighet blant innvandrere til en betydelig utgift for den norske velferdsstaten.         |         |         |
| Spørsmålstekst                                                                                                                       | Hvis du tar det i betraktning, hvor stor kostnad eller gevinst vil du si at innvandring er for den norske velferdsstaten? |         |         |
| Instruksjoner til intervjueren                                                                                                       | [Spurt hvis u=4 og ran10=4. ]                                                                                             |         |         |
| Kommentarer                                                                                                                          | Som du kanskje vet fører arbeidsledighet blant innvandrere til en betydelig utgift for den norske velferdsstaten. Hvis d  |         |         |
| Verdi                                                                                                                                | Merkelapp                                                                                                                 | Enheter | Prosent |
| 1                                                                                                                                    | Svært stor kostnad                                                                                                        | 18      | 0.4%    |
| 2                                                                                                                                    | Stor kostnad                                                                                                              | 50      | 1.1%    |
| 3                                                                                                                                    | En viss kostnad                                                                                                           | 55      | 1.2%    |
| 4                                                                                                                                    | Verken en kostnad eller en gevinst                                                                                        | 8       | 0.2%    |
| 5                                                                                                                                    | En viss gevinst                                                                                                           | 19      | 0.4%    |
| 6                                                                                                                                    | Stor gevinst                                                                                                              | 5       | 0.1%    |
| 7                                                                                                                                    | Svært stor gevinst                                                                                                        | 1       | 0.0%    |
| 97                                                                                                                                   | Ikke svart                                                                                                                | 4       | 0.1%    |
| 98                                                                                                                                   | Ikke spurt                                                                                                                | 4529    | 96.6%   |
| Advarsel: disse tallene indikerer antall enheter (cases) i datafilen. De kan ikke tolkes som oppsummert statistikk for populasjonen. |                                                                                                                           |         |         |
| # r7dvcost5: Innvandring hvor stor kostnad/gevinst for velferdsstaten? Inntekt                                                       |                                                                                                                           |         |         |
| Informasjon                                                                                                                          | [Type= diskret] [Format=numeric] [Rekkevidde= 1-7] [Missing=*]                                                            |         |         |

| # r7dvkost5: Innvandring hvor stor kostnad/gevinst for velferdsstaten? Inntekt                                                       |                                                                                                                                                       |         |         |
|--------------------------------------------------------------------------------------------------------------------------------------|-------------------------------------------------------------------------------------------------------------------------------------------------------|---------|---------|
| Statistikk [NW/ W]                                                                                                                   | [Gyldige=4689 /-] [Ugyldig=0 /-]                                                                                                                      |         |         |
| Tekst før spørsmål                                                                                                                   | Som du kanskje vet fører sysselsettingen av innvandrere i Norge til en betydelig inntekt for den norske velferdsstaten.                               |         |         |
| Spørsmålstekst                                                                                                                       | Hvis du tar det i betraktning, hvor stor kostnad eller gevinst vil du si at innvandring er for den norske velferdsstaten?                             |         |         |
| Instruksjoner til intervjueren                                                                                                       | [Spurt hvis u=4 og ran10=5. ]                                                                                                                         |         |         |
| Kommentarer                                                                                                                          | Som du kanskje vet fører sysselsettingen av innvandrere i Norge til en betydelig inntekt for den norske velferdsstaten.                               |         |         |
| Verdi                                                                                                                                | Merkelapp                                                                                                                                             | Enheter | Prosent |
| 1                                                                                                                                    | Svært stor kostnad                                                                                                                                    | 15      | 0.3%    |
| 2                                                                                                                                    | Stor kostnad                                                                                                                                          | 25      | 0.5%    |
| 3                                                                                                                                    | En viss kostnad                                                                                                                                       | 46      | 1.0%    |
| 4                                                                                                                                    | Verken en kostnad eller en gevinst                                                                                                                    | 33      | 0.7%    |
| 5                                                                                                                                    | En viss gevinst                                                                                                                                       | 43      | 0.9%    |
| 6                                                                                                                                    | Stor gevinst                                                                                                                                          | 11      | 0.2%    |
| 7                                                                                                                                    | Svært stor gevinst                                                                                                                                    | 2       | 0.0%    |
| 97                                                                                                                                   | Ikke svart                                                                                                                                            | 9       | 0.2%    |
| 98                                                                                                                                   | Ikke spurt                                                                                                                                            | 4505    | 96.1%   |
| Advarsel: disse tallene indikerer antall enheter (cases) i datafilen. De kan ikke tolkes som oppsummert statistikk for populasjonen. |                                                                                                                                                       |         |         |
| # r7dvkost6: Innvandring hvor stor kostnad/gevinst for velferdsstaten? Arbeidsledighet 7%, utgift                                    |                                                                                                                                                       |         |         |
| Informasjon                                                                                                                          | [Type= diskret] [Format=numeric] [Rekkevidde= 1-7] [Missing=*]                                                                                        |         |         |
| Statistikk [NW/ W]                                                                                                                   | [Gyldige=4689 /-] [Ugyldig=0 /-]                                                                                                                      |         |         |
| Tekst før spørsmål                                                                                                                   | Som du kanskje vet ligger arbeidsledigheten blant innvandrere i Norge på rundt 7%. Dette fører til en betydelig utgift for den norske velferdsstaten. |         |         |
| Spørsmålstekst                                                                                                                       | Hvis du tar det i betraktning, hvor stor kostnad eller gevinst vil du si at innvandring er for den norske velferdsstaten?                             |         |         |
| Instruksjoner til intervjueren                                                                                                       | [Spurt hvis u=4 og ran10=6. ]                                                                                                                         |         |         |
| Kommentarer                                                                                                                          | Som du kanskje vet ligger arbeidsledigheten blant innvandrere i Norge på rundt 7%. Dette fører til en betydelig utgift                                |         |         |
| Verdi                                                                                                                                | Merkelapp                                                                                                                                             | Enheter | Prosent |
| 1                                                                                                                                    | Svært stor kostnad                                                                                                                                    | 14      | 0.3%    |
| 2                                                                                                                                    | Stor kostnad                                                                                                                                          | 38      | 0.8%    |
| 3                                                                                                                                    | En viss kostnad                                                                                                                                       | 56      | 1.2%    |
| 4                                                                                                                                    | Verken en kostnad eller en gevinst                                                                                                                    | 20      | 0.4%    |
| 5                                                                                                                                    | En viss gevinst                                                                                                                                       | 28      | 0.6%    |
| 6                                                                                                                                    | Stor gevinst                                                                                                                                          | 6       | 0.1%    |
| 7                                                                                                                                    | Svært stor gevinst                                                                                                                                    | 1       | 0.0%    |
| 97                                                                                                                                   | Ikke svart                                                                                                                                            | 3       | 0.1%    |
| 98                                                                                                                                   | Ikke spurt                                                                                                                                            | 4523    | 96.5%   |
| Advarsel: disse tallene indikerer antall enheter (cases) i datafilen. De kan ikke tolkes som oppsummert statistikk for populasjonen. |                                                                                                                                                       |         |         |
| # r7dvkost7: Innvandring hvor stor kostnad/gevinst for velferdsstaten? Sysselsetting 60%, inntekt                                    |                                                                                                                                                       |         |         |
| Informasjon                                                                                                                          | [Type= diskret] [Format=numeric] [Rekkevidde= 1-7] [Missing=*]                                                                                        |         |         |
| Statistikk [NW/ W]                                                                                                                   | [Gyldige=4689 /-] [Ugyldig=0 /-]                                                                                                                      |         |         |
| Tekst før spørsmål                                                                                                                   | Som du kanskje vet ligger sysselsettingen blant innvandrere i Norge på rundt 60%. Dette fører til en betydelig inntekt til den norske velferdsstaten. |         |         |
| Spørsmålstekst                                                                                                                       | Hvis du tar det i betraktning, hvor stor kostnad eller gevinst vil du si at innvandring er for den norske velferdsstaten?                             |         |         |
| Instruksjoner til intervjueren                                                                                                       | [Spurt hvis u=4 og ran10=7. ]                                                                                                                         |         |         |

# r7dvkost7: Innvandring hvor stor kostnad/gevinst for velferdsstaten? Sysselsetting 60%, inntekt

Kommentarer

Som du kanskje vet ligger sysselsettingen blant innvandrere i Norge på rundt 60%. Dette fører til en betydelig inntekt

| Verdi | Merkelapp                          | Enheter | Prosent |
|-------|------------------------------------|---------|---------|
| 1     | Svært stor kostnad                 | 13      | 0.3%    |
| 2     | Stor kostnad                       | 27      | 0.6%    |
| 3     | En viss kostnad                    | 53      | 1.1%    |
| 4     | Verken en kostnad eller en gevinst | 8       | 0.2%    |
| 5     | En viss gevinst                    | 30      | 0.6%    |
| 6     | Stor gevinst                       | 13      | 0.3%    |
| 7     | Svært stor gevinst                 | 2       | 0.0%    |
| 97    | Ikke svart                         | 3       | 0.1%    |
| 98    | Ikke spurt                         | 4540    | 96.8%   |

Advarsel: disse tallene indikerer antall enheter (cases) i datafilen. De kan ikke tolkes som oppsummert statistikk for populasjonen.

# r7dvinn: Hvor mild/streng innvandringspolitikk bør Norge ha?

Informasjon

[Type= diskret] [Format=numeric] [Rekkevidde= 1-7] [Missing=\*]

Statistikk [NW/ W]

[Gyldige=4689 /-] [Ugyldig=0 /-]

Spørsmålstekst

Hvor mild eller streng innvandringspolitikk synes du Norge bør ha?

Instruksjoner til intervjueren

[Spurt hvis u=4. ]

| Verdi | Merkelapp                | Enheter | Prosent |
|-------|--------------------------|---------|---------|
| 1     | Veldig mild              | 5       | 0.1%    |
| 2     | Mild                     | 55      | 1.2%    |
| 3     | Noe mild                 | 110     | 2.3%    |
| 4     | Verken mild eller streng | 194     | 4.1%    |
| 5     | Noe streng               | 388     | 8.3%    |
| 6     | Streng                   | 293     | 6.2%    |
| 7     | Svært streng             | 116     | 2.5%    |
| 97    | Ikke svart               | 42      | 0.9%    |
| 98    | Ikke spurt               | 3486    | 74.3%   |

Advarsel: disse tallene indikerer antall enheter (cases) i datafilen. De kan ikke tolkes som oppsummert statistikk for populasjonen.

# r7nfc\_1: Utsagn: Foretrekker kompliserte fremfor lette oppgaver

Informasjon

[Type= diskret] [Format=numeric] [Rekkevidde= 1-7] [Missing=\*]

Statistikk [NW/ W]

[Gyldige=4689 /-] [Ugyldig=0 /-]

Tekst før spørsmål

Nå kommer noen litt andre typer spørsmål.  
Hvor enig eller uenig er du i følgende utsagn:

Spørsmålstekst

Jeg foretrekker kompliserte fremfor lette oppgaver.

Instruksjoner til intervjueren

[Spurt hvis R5NFC=0. Bare stilt til de respondentene som ikkje har svart på R5NFC i runde 5.]

Kommentarer

Jeg foretrekker kompliserte fremfor lette oppgaver. (Nå kommer noen litt andre typer spørsmål.Hvor enig eller uenig er

| Verdi | Merkelapp               | Enheter | Prosent |
|-------|-------------------------|---------|---------|
| 1     | Svært enig              | 54      | 1.2%    |
| 2     | Enig                    | 181     | 3.9%    |
| 3     | Noe enig                | 224     | 4.8%    |
| 4     | Verken enig eller uenig | 163     | 3.5%    |
| 5     | Noe uenig               | 70      | 1.5%    |

| # r7nfc_1: Utsagn: Foretrekker kompliserte fremfor lette oppgaver                                                                    |                                                                                                                          |         |         |
|--------------------------------------------------------------------------------------------------------------------------------------|--------------------------------------------------------------------------------------------------------------------------|---------|---------|
| Verdi                                                                                                                                | Merkelapp                                                                                                                | Enheter | Prosent |
| 6                                                                                                                                    | Uenig                                                                                                                    | 37      | 0.8%    |
| 7                                                                                                                                    | Svært uenig                                                                                                              | 7       | 0.1%    |
| 97                                                                                                                                   | Ikke svart                                                                                                               | 88      | 1.9%    |
| 98                                                                                                                                   | Ikke spurt                                                                                                               | 3865    | 82.4%   |
| Advarsel: disse tallene indikerer antall enheter (cases) i datafilen. De kan ikke tolkes som oppsummert statistikk for populasjonen. |                                                                                                                          |         |         |
| # r7nfc_2: Utsagn: Liker oppgaver som krever nye løsninger                                                                           |                                                                                                                          |         |         |
| Informasjon                                                                                                                          | [Type= diskret] [Format=numeric] [Rekkevidde= 1-7] [Missing=*]                                                           |         |         |
| Statistikk [NW/ W]                                                                                                                   | [Gyldige=4689 /-] [Ugyldig=0 /-]                                                                                         |         |         |
| Tekst før spørsmål                                                                                                                   | <p>Nå kommer noen litt andre typer spørsmål.</p> <p>Hvor enig eller uenig er du i følgende utsagn:</p>                   |         |         |
| Spørsmålstekst                                                                                                                       | Jeg liker svært godt oppgaver som går ut på at man må komme opp med nye løsninger.                                       |         |         |
| Instruksjoner til intervjueren                                                                                                       | [Spurt hvis R5NFC=0. Bare stilt til de respondentene som ikkje har svart på R5NFC i runde 5.]                            |         |         |
| Kommentarer                                                                                                                          | Jeg liker svært godt oppgaver som går ut på at man må komme opp med nye løsninger. (Nå kommer noen litt andre typer      |         |         |
| Verdi                                                                                                                                | Merkelapp                                                                                                                | Enheter | Prosent |
| 1                                                                                                                                    | Svært enig                                                                                                               | 110     | 2.3%    |
| 2                                                                                                                                    | Enig                                                                                                                     | 289     | 6.2%    |
| 3                                                                                                                                    | Noe enig                                                                                                                 | 198     | 4.2%    |
| 4                                                                                                                                    | Verken enig eller uenig                                                                                                  | 100     | 2.1%    |
| 5                                                                                                                                    | Noe uenig                                                                                                                | 32      | 0.7%    |
| 6                                                                                                                                    | Uenig                                                                                                                    | 9       | 0.2%    |
| 7                                                                                                                                    | Svært uenig                                                                                                              | 3       | 0.1%    |
| 97                                                                                                                                   | Ikke svart                                                                                                               | 83      | 1.8%    |
| 98                                                                                                                                   | Ikke spurt                                                                                                               | 3865    | 82.4%   |
| Advarsel: disse tallene indikerer antall enheter (cases) i datafilen. De kan ikke tolkes som oppsummert statistikk for populasjonen. |                                                                                                                          |         |         |
| # r7nfc_3: Utsagn: Ville foretrukket intellektuell oppgave fremfor en som krever lite tenking                                        |                                                                                                                          |         |         |
| Informasjon                                                                                                                          | [Type= diskret] [Format=numeric] [Rekkevidde= 1-7] [Missing=*]                                                           |         |         |
| Statistikk [NW/ W]                                                                                                                   | [Gyldige=4689 /-] [Ugyldig=0 /-]                                                                                         |         |         |
| Tekst før spørsmål                                                                                                                   | <p>Nå kommer noen litt andre typer spørsmål.</p> <p>Hvor enig eller uenig er du i følgende utsagn:</p>                   |         |         |
| Spørsmålstekst                                                                                                                       | Jeg ville foretrukket en oppgave som er intellektuell og innviklet fremfor en oppgave som krever lite tenking.           |         |         |
| Instruksjoner til intervjueren                                                                                                       | [Spurt hvis R5NFC=0. Bare stilt til de respondentene som ikkje har svart på R5NFC i runde 5.]                            |         |         |
| Kommentarer                                                                                                                          | Jeg ville foretrukket en oppgave som er intellektuell og innviklet fremfor en oppgave som krever lite tenking. (Nå komme |         |         |
| Verdi                                                                                                                                | Merkelapp                                                                                                                | Enheter | Prosent |
| 1                                                                                                                                    | Svært enig                                                                                                               | 83      | 1.8%    |
| 2                                                                                                                                    | Enig                                                                                                                     | 235     | 5.0%    |
| 3                                                                                                                                    | Noe enig                                                                                                                 | 173     | 3.7%    |
| 4                                                                                                                                    | Verken enig eller uenig                                                                                                  | 147     | 3.1%    |
| 5                                                                                                                                    | Noe uenig                                                                                                                | 56      | 1.2%    |
| 6                                                                                                                                    | Uenig                                                                                                                    | 34      | 0.7%    |
| 7                                                                                                                                    | Svært uenig                                                                                                              | 5       | 0.1%    |

| # r7nfc_3: Utsagn: Ville foretrukket intellektuell oppgave fremfor en som krever lite tenking                                        |                                                                                                            |         |                        |       |
|--------------------------------------------------------------------------------------------------------------------------------------|------------------------------------------------------------------------------------------------------------|---------|------------------------|-------|
| Verdi                                                                                                                                | Merkelapp                                                                                                  | Enheter | Prosent                |       |
| 97                                                                                                                                   | Ikke svart                                                                                                 | 91      | <div><div></div></div> | 1.9%  |
| 98                                                                                                                                   | Ikke spurt                                                                                                 | 3865    | <div><div></div></div> | 82.4% |
| Advarsel: disse tallene indikerer antall enheter (cases) i datafilen. De kan ikke tolkes som oppsummert statistikk for populasjonen. |                                                                                                            |         |                        |       |
| # r7nte_1: Utsagn: Mening om det aller meste                                                                                         |                                                                                                            |         |                        |       |
| Informasjon                                                                                                                          | [Type= diskret] [Format=numeric] [Rekkevidde= 1-7] [Missing=*]                                             |         |                        |       |
| Statistikk [NW/ W]                                                                                                                   | [Gyldige=4689 /-] [Ugyldig=0 /-]                                                                           |         |                        |       |
| Tekst før spørsmål                                                                                                                   | Hvor enig eller uenig er du i følgende utsagn:                                                             |         |                        |       |
| Spørsmålstekst                                                                                                                       | Jeg har en mening om det aller meste.                                                                      |         |                        |       |
| Instruksjoner til intervjueren                                                                                                       | [Spurt hvis R5NTE=0. Bare stilt til de respondentene som ikkje har svart på R5NTE i runde 5.]              |         |                        |       |
| Kommentarer                                                                                                                          | Jeg har en mening om det aller meste. (Hvor enig eller uenig er du i følgende utsagn:)                     |         |                        |       |
| Verdi                                                                                                                                | Merkelapp                                                                                                  | Enheter | Prosent                |       |
| 1                                                                                                                                    | Svært enig                                                                                                 | 53      | <div><div></div></div> | 1.1%  |
| 2                                                                                                                                    | Enig                                                                                                       | 190     | <div><div></div></div> | 4.1%  |
| 3                                                                                                                                    | Noe enig                                                                                                   | 270     | <div><div></div></div> | 5.8%  |
| 4                                                                                                                                    | Verken enig eller uenig                                                                                    | 93      | <div><div></div></div> | 2.0%  |
| 5                                                                                                                                    | Noe uenig                                                                                                  | 83      | <div><div></div></div> | 1.8%  |
| 6                                                                                                                                    | Uenig                                                                                                      | 36      | <div><div></div></div> | 0.8%  |
| 7                                                                                                                                    | Svært uenig                                                                                                | 3       | <div><div></div></div> | 0.1%  |
| 97                                                                                                                                   | Ikke svart                                                                                                 | 76      | <div><div></div></div> | 1.6%  |
| 98                                                                                                                                   | Ikke spurt                                                                                                 | 3885    | <div><div></div></div> | 82.9% |
| Advarsel: disse tallene indikerer antall enheter (cases) i datafilen. De kan ikke tolkes som oppsummert statistikk for populasjonen. |                                                                                                            |         |                        |       |
| # r7nte_2: Utsagn: Viktig å mene om noe er rett/galt                                                                                 |                                                                                                            |         |                        |       |
| Informasjon                                                                                                                          | [Type= diskret] [Format=numeric] [Rekkevidde= 1-7] [Missing=*]                                             |         |                        |       |
| Statistikk [NW/ W]                                                                                                                   | [Gyldige=4689 /-] [Ugyldig=0 /-]                                                                           |         |                        |       |
| Tekst før spørsmål                                                                                                                   | Hvor enig eller uenig er du i følgende utsagn:                                                             |         |                        |       |
| Spørsmålstekst                                                                                                                       | Jeg synes det er viktig å mene om noe er rett eller galt.                                                  |         |                        |       |
| Instruksjoner til intervjueren                                                                                                       | [Spurt hvis R5NTE=0. Bare stilt til de respondentene som ikkje har svart på R5NTE i runde 5.]              |         |                        |       |
| Kommentarer                                                                                                                          | Jeg synes det er viktig å mene om noe er rett eller galt. (Hvor enig eller uenig er du i følgende utsagn:) |         |                        |       |
| Verdi                                                                                                                                | Merkelapp                                                                                                  | Enheter | Prosent                |       |
| 1                                                                                                                                    | Svært enig                                                                                                 | 108     | <div><div></div></div> | 2.3%  |
| 2                                                                                                                                    | Enig                                                                                                       | 312     | <div><div></div></div> | 6.7%  |
| 3                                                                                                                                    | Noe enig                                                                                                   | 179     | <div><div></div></div> | 3.8%  |
| 4                                                                                                                                    | Verken enig eller uenig                                                                                    | 77      | <div><div></div></div> | 1.6%  |
| 5                                                                                                                                    | Noe uenig                                                                                                  | 36      | <div><div></div></div> | 0.8%  |
| 6                                                                                                                                    | Uenig                                                                                                      | 15      | <div><div></div></div> | 0.3%  |
| 7                                                                                                                                    | Svært uenig                                                                                                | 7       | <div><div></div></div> | 0.1%  |
| 97                                                                                                                                   | Ikke svart                                                                                                 | 70      | <div><div></div></div> | 1.5%  |
| 98                                                                                                                                   | Ikke spurt                                                                                                 | 3885    | <div><div></div></div> | 82.9% |
| Advarsel: disse tallene indikerer antall enheter (cases) i datafilen. De kan ikke tolkes som oppsummert statistikk for populasjonen. |                                                                                                            |         |                        |       |
| # r7k13: Hvor ofte diskuterer du politikk med andre?                                                                                 |                                                                                                            |         |                        |       |
| Informasjon                                                                                                                          | [Type= diskret] [Format=numeric] [Rekkevidde= 1-4] [Missing=*]                                             |         |                        |       |

| # r7k13: Hvor ofte diskuterer du politikk med andre?                                                                                 |                                                                                                                                               |         |                               |
|--------------------------------------------------------------------------------------------------------------------------------------|-----------------------------------------------------------------------------------------------------------------------------------------------|---------|-------------------------------|
| Statistikk [NW/ W]                                                                                                                   | [Gyldige=4689 /-] [Ugyldig=0 /-]                                                                                                              |         |                               |
| Spørsmålstekst                                                                                                                       | Hvor ofte vil du si at du diskuterer politikk med andre?                                                                                      |         |                               |
| Instruksjoner til intervjueren                                                                                                       | [Spurt hvis R6K13=0. Bare stilt til de respondentene som ikkje har svart på R5NFC i runde 5.]                                                 |         |                               |
| Verdi                                                                                                                                | Merkelapp                                                                                                                                     | Enheter | Prosent                       |
| 1                                                                                                                                    | Ofte                                                                                                                                          | 213     | <div><div></div></div> 4.5%   |
| 2                                                                                                                                    | Av og til                                                                                                                                     | 413     | <div><div></div></div> 8.8%   |
| 3                                                                                                                                    | Sjelden                                                                                                                                       | 196     | <div><div></div></div> 4.2%   |
| 4                                                                                                                                    | Aldri                                                                                                                                         | 24      | <div><div></div></div> 0.5%   |
| 97                                                                                                                                   | Ikke svart                                                                                                                                    | 71      | <div><div></div></div> 1.5%   |
| 98                                                                                                                                   | Ikke spurt                                                                                                                                    | 3772    | <div><div></div></div> 80.4%  |
| Advarsel: disse tallene indikerer antall enheter (cases) i datafilen. De kan ikke tolkes som oppsummert statistikk for populasjonen. |                                                                                                                                               |         |                               |
| # r7k33: Hva stemmer best med det du har gjort siste uken?                                                                           |                                                                                                                                               |         |                               |
| Informasjon                                                                                                                          | [Type= diskret] [Format=numeric] [Rekkevidde= 1-9] [Missing=*]                                                                                |         |                               |
| Statistikk [NW/ W]                                                                                                                   | [Gyldige=4689 /-] [Ugyldig=0 /-]                                                                                                              |         |                               |
| Spørsmålstekst                                                                                                                       | Hvilken av beskrivelsene under passer best på det du har gjort de siste 7 dagene?                                                             |         |                               |
| Tekst etter spørsmål                                                                                                                 | Merk av ett alternativ.                                                                                                                       |         |                               |
| Instruksjoner til intervjueren                                                                                                       | [Spurt hvis R6K33=0. Bare stilt til de respondentene som ikkje har svart på R5NFC i runde 5.]                                                 |         |                               |
| Kommentarer                                                                                                                          | Hvilken av beskrivelsene under passer best på det du har gjort de siste 7 dagene?                                                             |         |                               |
| Verdi                                                                                                                                | Merkelapp                                                                                                                                     | Enheter | Prosent                       |
| 1                                                                                                                                    | I lønnet arbeid (eller midlertidig fraværende)                                                                                                | 541     | <div><div></div></div> 11.5%  |
| 2                                                                                                                                    | Under utdanning (som ikke er betalt av arbeidsgiver)                                                                                          | 70      | <div><div></div></div> 1.5%   |
| 3                                                                                                                                    | Arbeidsledig og aktivt arbeidssøkende                                                                                                         | 26      | <div><div></div></div> 0.6%   |
| 4                                                                                                                                    | Arbeidsledig, ønsker en jobb men er ikke aktivt arbeidssøkende                                                                                | 10      | <div><div></div></div> 0.2%   |
| 5                                                                                                                                    | Varig syk eller funksjonshemmet                                                                                                               | 32      | <div><div></div></div> 0.7%   |
| 6                                                                                                                                    | Pensjonert                                                                                                                                    | 141     | <div><div></div></div> 3.0%   |
| 7                                                                                                                                    | I sivilteneste eller militærtjeneste                                                                                                          | 1       | <div><div></div></div> 0.0%   |
| 8                                                                                                                                    | Hjemmeværende, passer barn eller andre personer                                                                                               | 20      | <div><div></div></div> 0.4%   |
| 9                                                                                                                                    | Annet                                                                                                                                         | 42      | <div><div></div></div> 0.9%   |
| 97                                                                                                                                   | Ikke svart                                                                                                                                    | 83      | <div><div></div></div> 1.8%   |
| 98                                                                                                                                   | Ikke spurt                                                                                                                                    | 3723    | <div><div></div></div> 79.4%  |
| Advarsel: disse tallene indikerer antall enheter (cases) i datafilen. De kan ikke tolkes som oppsummert statistikk for populasjonen. |                                                                                                                                               |         |                               |
| # r7k33_9_other: Hva stemmer best med det du har gjort siste uken? Annet [anonymisert]                                               |                                                                                                                                               |         |                               |
| Informasjon                                                                                                                          | [Type= diskret] [Format=character] [Missing=*]                                                                                                |         |                               |
| Statistikk [NW/ W]                                                                                                                   | [Gyldige=4689 /-] [Ugyldig=0 /-]                                                                                                              |         |                               |
| Spørsmålstekst                                                                                                                       | Hvilken av beskrivelsene under passer best på det du har gjort de siste 7 dagene?                                                             |         |                               |
| Tekst etter spørsmål                                                                                                                 | Merk av ett alternativ.                                                                                                                       |         |                               |
| Instruksjoner til intervjueren                                                                                                       | [Spurt hvis R6K33=0. Bare stilt til de respondentene som ikkje har svart på R5NFC i runde 5.]<br>[Data tilbakeholdt av hensyn til anonymitet] |         |                               |
| Kommentarer                                                                                                                          | Annet (Hvilken av beskrivelsene under passer best på det du har gjort de siste 7 dagene? )                                                    |         |                               |
| Verdi                                                                                                                                | Merkelapp                                                                                                                                     | Enheter | Prosent                       |
|                                                                                                                                      |                                                                                                                                               | 4689    | <div><div></div></div> 100.0% |



| # r7k33_9_other: Hva stemmer best med det du har gjort siste uken? Annet [anonymisert]                                               |                                                                                               |         |                   |
|--------------------------------------------------------------------------------------------------------------------------------------|-----------------------------------------------------------------------------------------------|---------|-------------------|
| Advarsel: disse tallene indikerer antall enheter (cases) i datafilen. De kan ikke tolkes som oppsummert statistikk for populasjonen. |                                                                                               |         |                   |
| # r7k34_1: Hvilken bransje jobber du innenfor: Offentlig sentralforvaltning                                                          |                                                                                               |         |                   |
| Informasjon                                                                                                                          | [Type= diskret] [Format=numeric] [Rekkevidde= 1-1] [Missing=*]                                |         |                   |
| Statistikk [NW/ W]                                                                                                                   | [Gyldige=4689 /-] [Ugyldig=0 /-]                                                              |         |                   |
| Spørsmålstekst                                                                                                                       | Hvilken bransje arbeider du (din bedrift) innenfor?                                           |         |                   |
| Tekst etter spørsmål                                                                                                                 | Det er mulig å krysse av for flere svar.                                                      |         |                   |
| Instruksjoner til intervjueren                                                                                                       | [Spurt hvis R6K33=1. ]                                                                        |         |                   |
| Kommentarer                                                                                                                          | Offentlig sentralforvaltning/myndighet (Hvilken bransje arbeider du (din bedrift) innenfor? ) |         |                   |
| Verdi                                                                                                                                | Merkelapp                                                                                     | Enheter | Prosent           |
| 0                                                                                                                                    |                                                                                               | 3406    | <div></div> 72.6% |
| 1                                                                                                                                    | Offentlig sentralforvaltning/myndighet                                                        | 275     | <div></div> 5.9%  |
| 97                                                                                                                                   | Ikke svart                                                                                    | 42      | <div></div> 0.9%  |
| 98                                                                                                                                   | Ikke spurt                                                                                    | 966     | <div></div> 20.6% |
| Advarsel: disse tallene indikerer antall enheter (cases) i datafilen. De kan ikke tolkes som oppsummert statistikk for populasjonen. |                                                                                               |         |                   |
| # r7k34_2: Hvilken bransje jobber du innenfor: Barnehage/skole/undervisning                                                          |                                                                                               |         |                   |
| Informasjon                                                                                                                          | [Type= diskret] [Format=numeric] [Rekkevidde= 1-1] [Missing=*]                                |         |                   |
| Statistikk [NW/ W]                                                                                                                   | [Gyldige=4689 /-] [Ugyldig=0 /-]                                                              |         |                   |
| Spørsmålstekst                                                                                                                       | Hvilken bransje arbeider du (din bedrift) innenfor?                                           |         |                   |
| Tekst etter spørsmål                                                                                                                 | Det er mulig å krysse av for flere svar.                                                      |         |                   |
| Instruksjoner til intervjueren                                                                                                       | [Spurt hvis R6K33=1. ]                                                                        |         |                   |
| Kommentarer                                                                                                                          | Barnehage/skole/undervisning (Hvilken bransje arbeider du (din bedrift) innenfor? )           |         |                   |
| Verdi                                                                                                                                | Merkelapp                                                                                     | Enheter | Prosent           |
| 0                                                                                                                                    |                                                                                               | 3249    | <div></div> 69.3% |
| 1                                                                                                                                    | Barnehage/skole/undervisning                                                                  | 432     | <div></div> 9.2%  |
| 97                                                                                                                                   | Ikke svart                                                                                    | 42      | <div></div> 0.9%  |
| 98                                                                                                                                   | Ikke spurt                                                                                    | 966     | <div></div> 20.6% |
| Advarsel: disse tallene indikerer antall enheter (cases) i datafilen. De kan ikke tolkes som oppsummert statistikk for populasjonen. |                                                                                               |         |                   |
| # r7k34_3: Hvilken bransje jobber du innenfor: Helsetjenester                                                                        |                                                                                               |         |                   |
| Informasjon                                                                                                                          | [Type= diskret] [Format=numeric] [Rekkevidde= 1-1] [Missing=*]                                |         |                   |
| Statistikk [NW/ W]                                                                                                                   | [Gyldige=4689 /-] [Ugyldig=0 /-]                                                              |         |                   |
| Spørsmålstekst                                                                                                                       | Hvilken bransje arbeider du (din bedrift) innenfor?                                           |         |                   |
| Tekst etter spørsmål                                                                                                                 | Det er mulig å krysse av for flere svar.                                                      |         |                   |
| Instruksjoner til intervjueren                                                                                                       | [Spurt hvis R6K33=1. ]                                                                        |         |                   |
| Verdi                                                                                                                                | Merkelapp                                                                                     | Enheter | Prosent           |
| 0                                                                                                                                    |                                                                                               | 3259    | <div></div> 69.5% |
| 1                                                                                                                                    | Helsetjenester                                                                                | 422     | <div></div> 9.0%  |
| 97                                                                                                                                   | Ikke svart                                                                                    | 42      | <div></div> 0.9%  |
| 98                                                                                                                                   | Ikke spurt                                                                                    | 966     | <div></div> 20.6% |
| Advarsel: disse tallene indikerer antall enheter (cases) i datafilen. De kan ikke tolkes som oppsummert statistikk for populasjonen. |                                                                                               |         |                   |

| # r7k34_4: Hvilken bransje jobber du innenfor: Sosialtjenester/barnevern                                                             |                                                                                           |         |                   |
|--------------------------------------------------------------------------------------------------------------------------------------|-------------------------------------------------------------------------------------------|---------|-------------------|
| Informasjon                                                                                                                          | [Type= diskret] [Format=numeric] [Rekkevidde= 1-1] [Missing=*]                            |         |                   |
| Statistikk [NW/ W]                                                                                                                   | [Gyldige=4689 /-] [Ugyldig=0 /-]                                                          |         |                   |
| Spørsmålstekst                                                                                                                       | Hvilken bransje arbeider du (din bedrift) innenfor?                                       |         |                   |
| Tekst etter spørsmål                                                                                                                 | Det er mulig å krysse av for flere svar.                                                  |         |                   |
| Instruksjoner til intervjueren                                                                                                       | [Spurt hvis R6K33=1. ]                                                                    |         |                   |
| Verdi                                                                                                                                | Merkelapp                                                                                 | Enheter | Prosent           |
| 0                                                                                                                                    |                                                                                           | 3600    | <div></div> 76.8% |
| 1                                                                                                                                    | Sosialtjenester/barnevern                                                                 | 81      | <div></div> 1.7%  |
| 97                                                                                                                                   | Ikke svart                                                                                | 42      | <div></div> 0.9%  |
| 98                                                                                                                                   | Ikke spurt                                                                                | 966     | <div></div> 20.6% |
| Advarsel: disse tallene indikerer antall enheter (cases) i datafilen. De kan ikke tolkes som oppsummert statistikk for populasjonen. |                                                                                           |         |                   |
| # r7k34_5: Hvilken bransje jobber du innenfor: Pleie- og omsorgstjenester                                                            |                                                                                           |         |                   |
| Informasjon                                                                                                                          | [Type= diskret] [Format=numeric] [Rekkevidde= 1-1] [Missing=*]                            |         |                   |
| Statistikk [NW/ W]                                                                                                                   | [Gyldige=4689 /-] [Ugyldig=0 /-]                                                          |         |                   |
| Spørsmålstekst                                                                                                                       | Hvilken bransje arbeider du (din bedrift) innenfor?                                       |         |                   |
| Tekst etter spørsmål                                                                                                                 | Det er mulig å krysse av for flere svar.                                                  |         |                   |
| Instruksjoner til intervjueren                                                                                                       | [Spurt hvis R6K33=1. ]                                                                    |         |                   |
| Kommentarer                                                                                                                          | Pleie- og omsorgstjenester (Hvilken bransje arbeider du (din bedrift) innenfor? )         |         |                   |
| Verdi                                                                                                                                | Merkelapp                                                                                 | Enheter | Prosent           |
| 0                                                                                                                                    |                                                                                           | 3527    | <div></div> 75.2% |
| 1                                                                                                                                    | Pleie- og omsorgstjenester                                                                | 154     | <div></div> 3.3%  |
| 97                                                                                                                                   | Ikke svart                                                                                | 42      | <div></div> 0.9%  |
| 98                                                                                                                                   | Ikke spurt                                                                                | 966     | <div></div> 20.6% |
| Advarsel: disse tallene indikerer antall enheter (cases) i datafilen. De kan ikke tolkes som oppsummert statistikk for populasjonen. |                                                                                           |         |                   |
| # r7k34_6: Hvilken bransje jobber du innenfor: Forsvar/politi/rettsvesen/vakthold                                                    |                                                                                           |         |                   |
| Informasjon                                                                                                                          | [Type= diskret] [Format=numeric] [Rekkevidde= 1-1] [Missing=*]                            |         |                   |
| Statistikk [NW/ W]                                                                                                                   | [Gyldige=4689 /-] [Ugyldig=0 /-]                                                          |         |                   |
| Spørsmålstekst                                                                                                                       | Hvilken bransje arbeider du (din bedrift) innenfor?                                       |         |                   |
| Tekst etter spørsmål                                                                                                                 | Det er mulig å krysse av for flere svar.                                                  |         |                   |
| Instruksjoner til intervjueren                                                                                                       | [Spurt hvis R6K33=1. ]                                                                    |         |                   |
| Kommentarer                                                                                                                          | Forsvar/politi/rettsvesen/vakthold (Hvilken bransje arbeider du (din bedrift) innenfor? ) |         |                   |
| Verdi                                                                                                                                | Merkelapp                                                                                 | Enheter | Prosent           |
| 0                                                                                                                                    |                                                                                           | 3586    | <div></div> 76.5% |
| 1                                                                                                                                    | Forsvar/politi/rettsvesen/vakthold                                                        | 95      | <div></div> 2.0%  |
| 97                                                                                                                                   | Ikke svart                                                                                | 42      | <div></div> 0.9%  |
| 98                                                                                                                                   | Ikke spurt                                                                                | 966     | <div></div> 20.6% |
| Advarsel: disse tallene indikerer antall enheter (cases) i datafilen. De kan ikke tolkes som oppsummert statistikk for populasjonen. |                                                                                           |         |                   |
| # r7k34_7: Hvilken bransje jobber du innenfor: Landbruk/skogbruk/fiske                                                               |                                                                                           |         |                   |
| Informasjon                                                                                                                          | [Type= diskret] [Format=numeric] [Rekkevidde= 1-1] [Missing=*]                            |         |                   |
| Statistikk [NW/ W]                                                                                                                   | [Gyldige=4689 /-] [Ugyldig=0 /-]                                                          |         |                   |

| # r7k34_7: Hvilken bransje jobber du innenfor: Landbruk/skogbruk/fiske                                                               |                                                                |         |                   |
|--------------------------------------------------------------------------------------------------------------------------------------|----------------------------------------------------------------|---------|-------------------|
| Spørsmålstekst                                                                                                                       | Hvilken bransje arbeider du (din bedrift) innenfor?            |         |                   |
| Tekst etter spørsmål                                                                                                                 | Det er mulig å krysse av for flere svar.                       |         |                   |
| Instruksjoner til intervjueren                                                                                                       | [Spurt hvis R6K33=1. ]                                         |         |                   |
| Verdi                                                                                                                                | Merkelapp                                                      | Enheter | Prosent           |
| 0                                                                                                                                    |                                                                | 3560    | <div></div> 75.9% |
| 1                                                                                                                                    | Landbruk/skogbruk/fiske                                        | 121     | <div></div> 2.6%  |
| 97                                                                                                                                   | Ikke svart                                                     | 42      | <div></div> 0.9%  |
| 98                                                                                                                                   | Ikke spurt                                                     | 966     | <div></div> 20.6% |
| Advarsel: disse tallene indikerer antall enheter (cases) i datafilen. De kan ikke tolkes som oppsummert statistikk for populasjonen. |                                                                |         |                   |
| # r7k34_8: Hvilken bransje jobber du innenfor: Industri/Teknikk                                                                      |                                                                |         |                   |
| Informasjon                                                                                                                          | [Type= diskret] [Format=numeric] [Rekkevidde= 1-1] [Missing=*] |         |                   |
| Statistikk [NW/ W]                                                                                                                   | [Gyldige=4689 /-] [Ugyldig=0 /-]                               |         |                   |
| Spørsmålstekst                                                                                                                       | Hvilken bransje arbeider du (din bedrift) innenfor?            |         |                   |
| Tekst etter spørsmål                                                                                                                 | Det er mulig å krysse av for flere svar.                       |         |                   |
| Instruksjoner til intervjueren                                                                                                       | [Spurt hvis R6K33=1. ]                                         |         |                   |
| Verdi                                                                                                                                | Merkelapp                                                      | Enheter | Prosent           |
| 0                                                                                                                                    |                                                                | 3451    | <div></div> 73.6% |
| 1                                                                                                                                    | Industri/teknikk                                               | 230     | <div></div> 4.9%  |
| 97                                                                                                                                   | Ikke svart                                                     | 42      | <div></div> 0.9%  |
| 98                                                                                                                                   | Ikke spurt                                                     | 966     | <div></div> 20.6% |
| Advarsel: disse tallene indikerer antall enheter (cases) i datafilen. De kan ikke tolkes som oppsummert statistikk for populasjonen. |                                                                |         |                   |
| # r7k34_9: Hvilken bransje jobber du innenfor: Bygg/anlegg                                                                           |                                                                |         |                   |
| Informasjon                                                                                                                          | [Type= diskret] [Format=numeric] [Rekkevidde= 1-1] [Missing=*] |         |                   |
| Statistikk [NW/ W]                                                                                                                   | [Gyldige=4689 /-] [Ugyldig=0 /-]                               |         |                   |
| Spørsmålstekst                                                                                                                       | Hvilken bransje arbeider du (din bedrift) innenfor?            |         |                   |
| Tekst etter spørsmål                                                                                                                 | Det er mulig å krysse av for flere svar.                       |         |                   |
| Instruksjoner til intervjueren                                                                                                       | [Spurt hvis R6K33=1. ]                                         |         |                   |
| Verdi                                                                                                                                | Merkelapp                                                      | Enheter | Prosent           |
| 0                                                                                                                                    |                                                                | 3422    | <div></div> 73.0% |
| 1                                                                                                                                    | Bygg/anlegg                                                    | 259     | <div></div> 5.5%  |
| 97                                                                                                                                   | Ikke svart                                                     | 42      | <div></div> 0.9%  |
| 98                                                                                                                                   | Ikke spurt                                                     | 966     | <div></div> 20.6% |
| Advarsel: disse tallene indikerer antall enheter (cases) i datafilen. De kan ikke tolkes som oppsummert statistikk for populasjonen. |                                                                |         |                   |
| # r7k34_10: Hvilken bransje jobber du innenfor: Varehandel/butikk                                                                    |                                                                |         |                   |
| Informasjon                                                                                                                          | [Type= diskret] [Format=numeric] [Rekkevidde= 1-1] [Missing=*] |         |                   |
| Statistikk [NW/ W]                                                                                                                   | [Gyldige=4689 /-] [Ugyldig=0 /-]                               |         |                   |
| Spørsmålstekst                                                                                                                       | Hvilken bransje arbeider du (din bedrift) innenfor?            |         |                   |
| Tekst etter spørsmål                                                                                                                 | Det er mulig å krysse av for flere svar.                       |         |                   |
| Instruksjoner til intervjueren                                                                                                       | [Spurt hvis R6K33=1. ]                                         |         |                   |

| # r7k34_10: Hvilken bransje jobber du innenfor: Varehandel/butikk                                                                    |                                                                                     |         |                   |
|--------------------------------------------------------------------------------------------------------------------------------------|-------------------------------------------------------------------------------------|---------|-------------------|
| Verdi                                                                                                                                | Merkelapp                                                                           | Enheter | Prosent           |
| 0                                                                                                                                    |                                                                                     | 3512    | <div></div> 74.9% |
| 1                                                                                                                                    | Varehandel/butikk                                                                   | 169     | <div></div> 3.6%  |
| 97                                                                                                                                   | Ikke svart                                                                          | 42      | <div></div> 0.9%  |
| 98                                                                                                                                   | Ikke spurt                                                                          | 966     | <div></div> 20.6% |
| Advarsel: disse tallene indikerer antall enheter (cases) i datafilen. De kan ikke tolkes som oppsummert statistikk for populasjonen. |                                                                                     |         |                   |
| # r7k34_11: Hvilken bransje jobber du innenfor: Transport/samferdsel                                                                 |                                                                                     |         |                   |
| Informasjon                                                                                                                          | [Type= diskret] [Format=numeric] [Rekkevidde= 1-1] [Missing=*]                      |         |                   |
| Statistikk [NW/ W]                                                                                                                   | [Gyldige=4689 /-] [Ugyldig=0 /-]                                                    |         |                   |
| Spørsmålstekst                                                                                                                       | Hvilken bransje arbeider du (din bedrift) innenfor?                                 |         |                   |
| Tekst etter spørsmål                                                                                                                 | Det er mulig å krysse av for flere svar.                                            |         |                   |
| Instruksjoner til intervjueren                                                                                                       | [Spurt hvis R6K33=1. ]                                                              |         |                   |
| Verdi                                                                                                                                | Merkelapp                                                                           | Enheter | Prosent           |
| 0                                                                                                                                    |                                                                                     | 3515    | <div></div> 75.0% |
| 1                                                                                                                                    | Transport/samferdsel                                                                | 166     | <div></div> 3.5%  |
| 97                                                                                                                                   | Ikke svart                                                                          | 42      | <div></div> 0.9%  |
| 98                                                                                                                                   | Ikke spurt                                                                          | 966     | <div></div> 20.6% |
| Advarsel: disse tallene indikerer antall enheter (cases) i datafilen. De kan ikke tolkes som oppsummert statistikk for populasjonen. |                                                                                     |         |                   |
| # r7k34_12: Hvilken bransje jobber du innenfor: Kultur/idrett/organisasjoner                                                         |                                                                                     |         |                   |
| Informasjon                                                                                                                          | [Type= diskret] [Format=numeric] [Rekkevidde= 1-1] [Missing=*]                      |         |                   |
| Statistikk [NW/ W]                                                                                                                   | [Gyldige=4689 /-] [Ugyldig=0 /-]                                                    |         |                   |
| Spørsmålstekst                                                                                                                       | Hvilken bransje arbeider du (din bedrift) innenfor?                                 |         |                   |
| Tekst etter spørsmål                                                                                                                 | Det er mulig å krysse av for flere svar.                                            |         |                   |
| Instruksjoner til intervjueren                                                                                                       | [Spurt hvis R6K33=1. ]                                                              |         |                   |
| Kommentarer                                                                                                                          | Kultur/idrett/organisasjoner (Hvilken bransje arbeider du (din bedrift) innenfor? ) |         |                   |
| Verdi                                                                                                                                | Merkelapp                                                                           | Enheter | Prosent           |
| 0                                                                                                                                    |                                                                                     | 3552    | <div></div> 75.8% |
| 1                                                                                                                                    | Kultur/idrett/organisasjoner                                                        | 129     | <div></div> 2.8%  |
| 97                                                                                                                                   | Ikke svart                                                                          | 42      | <div></div> 0.9%  |
| 98                                                                                                                                   | Ikke spurt                                                                          | 966     | <div></div> 20.6% |
| Advarsel: disse tallene indikerer antall enheter (cases) i datafilen. De kan ikke tolkes som oppsummert statistikk for populasjonen. |                                                                                     |         |                   |
| # r7k34_13: Hvilken bransje jobber du innenfor: Media/reklame/PR/informasjon                                                         |                                                                                     |         |                   |
| Informasjon                                                                                                                          | [Type= diskret] [Format=numeric] [Rekkevidde= 1-1] [Missing=*]                      |         |                   |
| Statistikk [NW/ W]                                                                                                                   | [Gyldige=4689 /-] [Ugyldig=0 /-]                                                    |         |                   |
| Spørsmålstekst                                                                                                                       | Hvilken bransje arbeider du (din bedrift) innenfor?                                 |         |                   |
| Tekst etter spørsmål                                                                                                                 | Det er mulig å krysse av for flere svar.                                            |         |                   |
| Instruksjoner til intervjueren                                                                                                       | [Spurt hvis R6K33=1. ]                                                              |         |                   |
| Kommentarer                                                                                                                          | Media/reklame/PR/informasjon (Hvilken bransje arbeider du (din bedrift) innenfor? ) |         |                   |
| Verdi                                                                                                                                | Merkelapp                                                                           | Enheter | Prosent           |
| 0                                                                                                                                    |                                                                                     | 3598    | <div></div> 76.7% |

| # r7k34_13: Hvilken bransje jobber du innenfor: Media/reklame/PR/informasjon                                                         |                                                                |         |         |
|--------------------------------------------------------------------------------------------------------------------------------------|----------------------------------------------------------------|---------|---------|
| Verdi                                                                                                                                | Merkelapp                                                      | Enheter | Prosent |
| 1                                                                                                                                    | Media/reklame/PR/informasjon                                   | 83      | 1.8%    |
| 97                                                                                                                                   | Ikke svart                                                     | 42      | 0.9%    |
| 98                                                                                                                                   | Ikke spurt                                                     | 966     | 20.6%   |
| Advarsel: disse tallene indikerer antall enheter (cases) i datafilen. De kan ikke tolkes som oppsummert statistikk for populasjonen. |                                                                |         |         |
| # r7k34_14: Hvilken bransje jobber du innenfor: Forskning/analyse                                                                    |                                                                |         |         |
| Informasjon                                                                                                                          | [Type= diskret] [Format=numeric] [Rekkevidde= 1-1] [Missing=*] |         |         |
| Statistikk [NW/ W]                                                                                                                   | [Gyldige=4689 /-] [Ugyldig=0 /-]                               |         |         |
| Spørsmålstekst                                                                                                                       | Hvilken bransje arbeider du (din bedrift) innenfor?            |         |         |
| Tekst etter spørsmål                                                                                                                 | Det er mulig å krysse av for flere svar.                       |         |         |
| Instruksjoner til intervjueren                                                                                                       | [Spurt hvis R6K33=1. ]                                         |         |         |
| Verdi                                                                                                                                | Merkelapp                                                      | Enheter | Prosent |
| 0                                                                                                                                    |                                                                | 3536    | 75.4%   |
| 1                                                                                                                                    | Forskning/analyse                                              | 145     | 3.1%    |
| 97                                                                                                                                   | Ikke svart                                                     | 42      | 0.9%    |
| 98                                                                                                                                   | Ikke spurt                                                     | 966     | 20.6%   |
| Advarsel: disse tallene indikerer antall enheter (cases) i datafilen. De kan ikke tolkes som oppsummert statistikk for populasjonen. |                                                                |         |         |
| # r7k34_15: Hvilken bransje jobber du innenfor: Reiseliv/hotell                                                                      |                                                                |         |         |
| Informasjon                                                                                                                          | [Type= diskret] [Format=numeric] [Rekkevidde= 1-1] [Missing=*] |         |         |
| Statistikk [NW/ W]                                                                                                                   | [Gyldige=4689 /-] [Ugyldig=0 /-]                               |         |         |
| Spørsmålstekst                                                                                                                       | Hvilken bransje arbeider du (din bedrift) innenfor?            |         |         |
| Tekst etter spørsmål                                                                                                                 | Det er mulig å krysse av for flere svar.                       |         |         |
| Instruksjoner til intervjueren                                                                                                       | [Spurt hvis R6K33=1. ]                                         |         |         |
| Verdi                                                                                                                                | Merkelapp                                                      | Enheter | Prosent |
| 0                                                                                                                                    |                                                                | 3634    | 77.5%   |
| 1                                                                                                                                    | Reiseliv/hotell                                                | 47      | 1.0%    |
| 97                                                                                                                                   | Ikke svart                                                     | 42      | 0.9%    |
| 98                                                                                                                                   | Ikke spurt                                                     | 966     | 20.6%   |
| Advarsel: disse tallene indikerer antall enheter (cases) i datafilen. De kan ikke tolkes som oppsummert statistikk for populasjonen. |                                                                |         |         |
| # r7k34_16: Hvilken bransje jobber du innenfor: Restaurant/servering                                                                 |                                                                |         |         |
| Informasjon                                                                                                                          | [Type= diskret] [Format=numeric] [Rekkevidde= 1-1] [Missing=*] |         |         |
| Statistikk [NW/ W]                                                                                                                   | [Gyldige=4689 /-] [Ugyldig=0 /-]                               |         |         |
| Spørsmålstekst                                                                                                                       | Hvilken bransje arbeider du (din bedrift) innenfor?            |         |         |
| Tekst etter spørsmål                                                                                                                 | Det er mulig å krysse av for flere svar.                       |         |         |
| Instruksjoner til intervjueren                                                                                                       | [Spurt hvis R6K33=1. ]                                         |         |         |
| Verdi                                                                                                                                | Merkelapp                                                      | Enheter | Prosent |
| 0                                                                                                                                    |                                                                | 3645    | 77.7%   |
| 1                                                                                                                                    | Restaurant/servering                                           | 36      | 0.8%    |
| 97                                                                                                                                   | Ikke svart                                                     | 42      | 0.9%    |
| 98                                                                                                                                   | Ikke spurt                                                     | 966     | 20.6%   |
| Advarsel: disse tallene indikerer antall enheter (cases) i datafilen. De kan ikke tolkes som oppsummert statistikk for populasjonen. |                                                                |         |         |

| # r7k34_17: Hvilken bransje jobber du innenfor: Telekommunikasjon/IT                                                                 |                                                                                                 |         |                   |
|--------------------------------------------------------------------------------------------------------------------------------------|-------------------------------------------------------------------------------------------------|---------|-------------------|
| Informasjon                                                                                                                          | [Type= diskret] [Format=numeric] [Rekkevidde= 1-1] [Missing=*]                                  |         |                   |
| Statistikk [NW/ W]                                                                                                                   | [Gyldige=4689 /-] [Ugyldig=0 /-]                                                                |         |                   |
| Spørsmålstekst                                                                                                                       | Hvilken bransje arbeider du (din bedrift) innenfor?                                             |         |                   |
| Tekst etter spørsmål                                                                                                                 | Det er mulig å krysse av for flere svar.                                                        |         |                   |
| Instruksjoner til intervjueren                                                                                                       | [Spurt hvis R6K33=1. ]                                                                          |         |                   |
| Verdi                                                                                                                                | Merkelapp                                                                                       | Enheter | Prosent           |
| 0                                                                                                                                    |                                                                                                 | 3527    | <div></div> 75.2% |
| 1                                                                                                                                    | Telekommunikasjon/IT                                                                            | 154     | <div></div> 3.3%  |
| 97                                                                                                                                   | Ikke svart                                                                                      | 42      | <div></div> 0.9%  |
| 98                                                                                                                                   | Ikke spurt                                                                                      | 966     | <div></div> 20.6% |
| Advarsel: disse tallene indikerer antall enheter (cases) i datafilen. De kan ikke tolkes som oppsummert statistikk for populasjonen. |                                                                                                 |         |                   |
| # r7k34_18: Hvilken bransje jobber du innenfor: Bank/forsikring/finans                                                               |                                                                                                 |         |                   |
| Informasjon                                                                                                                          | [Type= diskret] [Format=numeric] [Rekkevidde= 1-1] [Missing=*]                                  |         |                   |
| Statistikk [NW/ W]                                                                                                                   | [Gyldige=4689 /-] [Ugyldig=0 /-]                                                                |         |                   |
| Spørsmålstekst                                                                                                                       | Hvilken bransje arbeider du (din bedrift) innenfor?                                             |         |                   |
| Tekst etter spørsmål                                                                                                                 | Det er mulig å krysse av for flere svar.                                                        |         |                   |
| Instruksjoner til intervjueren                                                                                                       | [Spurt hvis R6K33=1. ]                                                                          |         |                   |
| Verdi                                                                                                                                | Merkelapp                                                                                       | Enheter | Prosent           |
| 0                                                                                                                                    |                                                                                                 | 3562    | <div></div> 76.0% |
| 1                                                                                                                                    | Bank/forsikring/finans                                                                          | 119     | <div></div> 2.5%  |
| 97                                                                                                                                   | Ikke svart                                                                                      | 42      | <div></div> 0.9%  |
| 98                                                                                                                                   | Ikke spurt                                                                                      | 966     | <div></div> 20.6% |
| Advarsel: disse tallene indikerer antall enheter (cases) i datafilen. De kan ikke tolkes som oppsummert statistikk for populasjonen. |                                                                                                 |         |                   |
| # r7k34_19: Hvilken bransje jobber du innenfor: Forretningsmessig service-/tjenesteyting                                             |                                                                                                 |         |                   |
| Informasjon                                                                                                                          | [Type= diskret] [Format=numeric] [Rekkevidde= 1-1] [Missing=*]                                  |         |                   |
| Statistikk [NW/ W]                                                                                                                   | [Gyldige=4689 /-] [Ugyldig=0 /-]                                                                |         |                   |
| Spørsmålstekst                                                                                                                       | Hvilken bransje arbeider du (din bedrift) innenfor?                                             |         |                   |
| Tekst etter spørsmål                                                                                                                 | Det er mulig å krysse av for flere svar.                                                        |         |                   |
| Instruksjoner til intervjueren                                                                                                       | [Spurt hvis R6K33=1. ]                                                                          |         |                   |
| Kommentarer                                                                                                                          | Forretningsmessig service-/tjenesteyting (Hvilken bransje arbeider du (din bedrift) innenfor? ) |         |                   |
| Verdi                                                                                                                                | Merkelapp                                                                                       | Enheter | Prosent           |
| 0                                                                                                                                    |                                                                                                 | 3505    | <div></div> 74.7% |
| 1                                                                                                                                    | Forretningsmessig service-/tjenesteyting                                                        | 176     | <div></div> 3.8%  |
| 97                                                                                                                                   | Ikke svart                                                                                      | 42      | <div></div> 0.9%  |
| 98                                                                                                                                   | Ikke spurt                                                                                      | 966     | <div></div> 20.6% |
| Advarsel: disse tallene indikerer antall enheter (cases) i datafilen. De kan ikke tolkes som oppsummert statistikk for populasjonen. |                                                                                                 |         |                   |
| # r7k34_20: Hvilken bransje jobber du innenfor: Olje/gass                                                                            |                                                                                                 |         |                   |
| Informasjon                                                                                                                          | [Type= diskret] [Format=numeric] [Rekkevidde= 1-1] [Missing=*]                                  |         |                   |
| Statistikk [NW/ W]                                                                                                                   | [Gyldige=4689 /-] [Ugyldig=0 /-]                                                                |         |                   |
| Spørsmålstekst                                                                                                                       | Hvilken bransje arbeider du (din bedrift) innenfor?                                             |         |                   |

| # r7k34_20: Hvilken bransje jobber du innenfor: Olje/gass                                                                            |            |                                          |                   |
|--------------------------------------------------------------------------------------------------------------------------------------|------------|------------------------------------------|-------------------|
| Tekst etter spørsmål                                                                                                                 |            | Det er mulig å krysse av for flere svar. |                   |
| Instruksjoner til intervjueren                                                                                                       |            | [Spurt hvis R6K33=1. ]                   |                   |
| Verdi                                                                                                                                | Merkelapp  | Enheter                                  | Prosent           |
| 0                                                                                                                                    |            | 3517                                     | <div></div> 75.0% |
| 1                                                                                                                                    | Olje/gass  | 164                                      | <div></div> 3.5%  |
| 97                                                                                                                                   | Ikke svart | 42                                       | <div></div> 0.9%  |
| 98                                                                                                                                   | Ikke spurt | 966                                      | <div></div> 20.6% |
| Advarsel: disse tallene indikerer antall enheter (cases) i datafilen. De kan ikke tolkes som oppsummert statistikk for populasjonen. |            |                                          |                   |

| # r7k34_21: Hvilken bransje jobber du innenfor: Annet                                                                                |                                                                                               |         |                    |
|--------------------------------------------------------------------------------------------------------------------------------------|-----------------------------------------------------------------------------------------------|---------|--------------------|
| Informasjon                                                                                                                          | [Type= diskret] [Format=numeric] [Rekkevidde= 1-1] [Missing=*]                                |         |                    |
| Statistikk [NW/ W]                                                                                                                   | [Gyldige=4689 /-] [Ugyldig=0 /-]                                                              |         |                    |
| Spørsmålstekst                                                                                                                       | Hvilken bransje arbeider du (din bedrift) innenfor?                                           |         |                    |
| Tekst etter spørsmål                                                                                                                 | Det er mulig å krysse av for flere svar.                                                      |         |                    |
| Instruksjoner til intervjueren                                                                                                       | [Spurt hvis R6K33=1. ]                                                                        |         |                    |
| Verdi                                                                                                                                | Merkelapp                                                                                     | Enheter | Prosent            |
| 0                                                                                                                                    |                                                                                               | 2790    | <div></div> 59.5%  |
| 1                                                                                                                                    | Annet                                                                                         | 891     | <div></div> 19.0%  |
| 97                                                                                                                                   | Ikke svart                                                                                    | 42      | <div></div> 0.9%   |
| 98                                                                                                                                   | Ikke spurt                                                                                    | 966     | <div></div> 20.6%  |
| Advarsel: disse tallene indikerer antall enheter (cases) i datafilen. De kan ikke tolkes som oppsummert statistikk for populasjonen. |                                                                                               |         |                    |
| # r7k34_21_other: Hvilken bransje jobber du innenfor: Annet [anonymisert]                                                            |                                                                                               |         |                    |
| Informasjon                                                                                                                          | [Type= diskret] [Format=character] [Missing=*]                                                |         |                    |
| Statistikk [NW/ W]                                                                                                                   | [Gyldige=4689 /-] [Ugyldig=0 /-]                                                              |         |                    |
| Spørsmålstekst                                                                                                                       | Hvilken bransje arbeider du (din bedrift) innenfor?                                           |         |                    |
| Tekst etter spørsmål                                                                                                                 | Det er mulig å krysse av for flere svar.                                                      |         |                    |
| Instruksjoner til intervjueren                                                                                                       | [Spurt hvis R6K33=1. ]                                                                        |         |                    |
|                                                                                                                                      | [Data tilbakeholdt av hensyn til anonymitet]                                                  |         |                    |
| Verdi                                                                                                                                | Merkelapp                                                                                     | Enheter | Prosent            |
|                                                                                                                                      |                                                                                               | 4689    | <div></div> 100.0% |
| Advarsel: disse tallene indikerer antall enheter (cases) i datafilen. De kan ikke tolkes som oppsummert statistikk for populasjonen. |                                                                                               |         |                    |
| # r7k35: Hvilken beskrivelse passer best på området du bor i?                                                                        |                                                                                               |         |                    |
| Informasjon                                                                                                                          | [Type= diskret] [Format=numeric] [Rekkevidde= 1-5] [Missing=*]                                |         |                    |
| Statistikk [NW/ W]                                                                                                                   | [Gyldige=4689 /-] [Ugyldig=0 /-]                                                              |         |                    |
| Spørsmålstekst                                                                                                                       | Hvilken beskrivelse passer best på området du bor i?                                          |         |                    |
| Tekst etter spørsmål                                                                                                                 | Vi tenker her på norske forhold.                                                              |         |                    |
| Instruksjoner til intervjueren                                                                                                       | [Spurt hvis R6K35=0. Bare stilt til de respondentene som ikkje har svart på R6K35 i runde 5.] |         |                    |
| Kommentarer                                                                                                                          | Hvilken beskrivelse passer best på området du bor i? Vi tenker her på norske forhold.         |         |                    |
| Verdi                                                                                                                                | Merkelapp                                                                                     | Enheter | Prosent            |
| 1                                                                                                                                    | En storby                                                                                     | 225     | <div></div> 4.8%   |
| 2                                                                                                                                    | En forstad eller utkanten av en storby                                                        | 185     | <div></div> 3.9%   |
| 3                                                                                                                                    | En liten eller mellomstor by                                                                  | 240     | <div></div> 5.1%   |
| 4                                                                                                                                    | Et bygdesentrum                                                                               | 137     | <div></div> 2.9%   |
| 5                                                                                                                                    | Et spredtbygd strøk                                                                           | 103     | <div></div> 2.2%   |
| 97                                                                                                                                   | Ikke svart                                                                                    | 81      | <div></div> 1.7%   |
| 98                                                                                                                                   | Ikke spurt                                                                                    | 3718    | <div></div> 79.3%  |
| Advarsel: disse tallene indikerer antall enheter (cases) i datafilen. De kan ikke tolkes som oppsummert statistikk for populasjonen. |                                                                                               |         |                    |
| # r7ran24: [Alle respondenter randomisert. ]                                                                                         |                                                                                               |         |                    |
| Informasjon                                                                                                                          | [Type= diskret] [Format=numeric] [Rekkevidde= 1-6] [Missing=*]                                |         |                    |
| Statistikk [NW/ W]                                                                                                                   | [Gyldige=4581 /-] [Ugyldig=108 /-]                                                            |         |                    |



| # r7ran24: [Alle respondenter randomisert. ]                                                                                         |            |                                                                                                                                                     |             |       |
|--------------------------------------------------------------------------------------------------------------------------------------|------------|-----------------------------------------------------------------------------------------------------------------------------------------------------|-------------|-------|
| Instruksjoner til intervjueren                                                                                                       |            | [Alle respondenter randomisert. ]                                                                                                                   |             |       |
| Verdi                                                                                                                                | Merkelapp  | Enheter                                                                                                                                             | Prosent     |       |
| 1                                                                                                                                    | 1          | 789                                                                                                                                                 | <div></div> | 17.2% |
| 2                                                                                                                                    | 2          | 778                                                                                                                                                 | <div></div> | 17.0% |
| 3                                                                                                                                    | 3          | 748                                                                                                                                                 | <div></div> | 16.3% |
| 4                                                                                                                                    | 4          | 762                                                                                                                                                 | <div></div> | 16.6% |
| 5                                                                                                                                    | 5          | 743                                                                                                                                                 | <div></div> | 16.2% |
| 6                                                                                                                                    | 6          | 761                                                                                                                                                 | <div></div> | 16.6% |
| Sysmiss                                                                                                                              |            | 108                                                                                                                                                 |             |       |
| Advarsel: disse tallene indikerer antall enheter (cases) i datafilen. De kan ikke tolkes som oppsummert statistikk for populasjonen. |            |                                                                                                                                                     |             |       |
| # r7ran24_1: [Randomiserer hvis ran24=1. ]                                                                                           |            |                                                                                                                                                     |             |       |
| Informasjon                                                                                                                          |            | [Type= diskret] [Format=numeric] [Rekkevidde= 1-3] [Missing=*]                                                                                      |             |       |
| Statistikk [NW/ W]                                                                                                                   |            | [Gyldige=789 /-] [Ugyldig=3900 /-]                                                                                                                  |             |       |
| Instruksjoner til intervjueren                                                                                                       |            | [Randomiserer hvis ran24=1. ]                                                                                                                       |             |       |
| Verdi                                                                                                                                | Merkelapp  | Enheter                                                                                                                                             | Prosent     |       |
| 1                                                                                                                                    | 1          | 250                                                                                                                                                 | <div></div> | 31.7% |
| 2                                                                                                                                    | 2          | 259                                                                                                                                                 | <div></div> | 32.8% |
| 3                                                                                                                                    | 3          | 280                                                                                                                                                 | <div></div> | 35.5% |
| Sysmiss                                                                                                                              |            | 3900                                                                                                                                                |             |       |
| Advarsel: disse tallene indikerer antall enheter (cases) i datafilen. De kan ikke tolkes som oppsummert statistikk for populasjonen. |            |                                                                                                                                                     |             |       |
| # ocr7matc1: Enig i hvor mange av tre påstander: Øke bistand, senke skatt på drivstoff, tillate store selskapers forurensing         |            |                                                                                                                                                     |             |       |
| Informasjon                                                                                                                          |            | [Type= diskret] [Format=numeric] [Rekkevidde= 1-4] [Missing=*]                                                                                      |             |       |
| Statistikk [NW/ W]                                                                                                                   |            | [Gyldige=4689 /-] [Ugyldig=0 /-]                                                                                                                    |             |       |
| Tekst før spørsmål                                                                                                                   |            | Hvor mange av de tre følgende påstandene er du enig i? Vi ønsker ikke å vite hvilke påstander, bare hvor mange.                                     |             |       |
| Spørsmålstekst                                                                                                                       |            | Norge bør øke bistanden til de fattige.<br>Norge bør senke skatten på bensin og diesel.<br>Norge bør tillate at store selskaper forurensar miljøet. |             |       |
| Instruksjoner til intervjueren                                                                                                       |            | [Spurt hvis ran24=1 og ran24_1=1. ]                                                                                                                 |             |       |
| Kommentarer                                                                                                                          |            | Hvor mange av de tre følgende påstandene er du enig i? Vi ønsker ikke å vite hvilke påstander, bare hvor mange.Norg                                 |             |       |
| Verdi                                                                                                                                | Merkelapp  | Enheter                                                                                                                                             | Prosent     |       |
| 1                                                                                                                                    | 0          | 41                                                                                                                                                  | <div></div> | 0.9%  |
| 2                                                                                                                                    | 1          | 167                                                                                                                                                 | <div></div> | 3.6%  |
| 3                                                                                                                                    | 2          | 37                                                                                                                                                  | <div></div> | 0.8%  |
| 4                                                                                                                                    | 3          | 3                                                                                                                                                   | <div></div> | 0.1%  |
| 97                                                                                                                                   | Ikke svart | 2                                                                                                                                                   | <div></div> | 0.0%  |
| 98                                                                                                                                   | Ikke spurt | 4439                                                                                                                                                | <div></div> | 94.7% |
| Advarsel: disse tallene indikerer antall enheter (cases) i datafilen. De kan ikke tolkes som oppsummert statistikk for populasjonen. |            |                                                                                                                                                     |             |       |
| # ocr7matc1a: Bør Norge la folk fra muslimske land komme og bosette seg?                                                             |            |                                                                                                                                                     |             |       |
| Informasjon                                                                                                                          |            | [Type= diskret] [Format=numeric] [Rekkevidde= 1-2] [Missing=*]                                                                                      |             |       |
| Statistikk [NW/ W]                                                                                                                   |            | [Gyldige=4689 /-] [Ugyldig=0 /-]                                                                                                                    |             |       |
| Spørsmålstekst                                                                                                                       |            | Synes du Norge bør la folk fra muslimske land komme for å bosette seg her?                                                                          |             |       |

| # ocr7matc1a: Bør Norge la folk fra muslimske land komme og bosette seg?                                                             |                                      |                                                                                                                                                     |                              |
|--------------------------------------------------------------------------------------------------------------------------------------|--------------------------------------|-----------------------------------------------------------------------------------------------------------------------------------------------------|------------------------------|
| Instruksjoner til intervjueren                                                                                                       |                                      | [Spurt hvis ran24=1 og ran24_1=1. ]                                                                                                                 |                              |
| Verdi                                                                                                                                | Merkelapp                            | Enheter                                                                                                                                             | Prosent                      |
| 1                                                                                                                                    | La komme for å bosette seg her.      | 159                                                                                                                                                 | <div><div></div></div> 3.4%  |
| 2                                                                                                                                    | Ikke la komme for å bosette seg her. | 80                                                                                                                                                  | <div><div></div></div> 1.7%  |
| 97                                                                                                                                   | Ikke svart                           | 11                                                                                                                                                  | <div><div></div></div> 0.2%  |
| 98                                                                                                                                   | Ikke spurt                           | 4439                                                                                                                                                | <div><div></div></div> 94.7% |
| Advarsel: disse tallene indikerer antall enheter (cases) i datafilen. De kan ikke tolkes som oppsummert statistikk for populasjonen. |                                      |                                                                                                                                                     |                              |
| # ocr7matc2: Enig i hvor mange av tre påstander: Øke bistand, senke skatt på drivstoff, tillate store selskapers forurensing         |                                      |                                                                                                                                                     |                              |
| Informasjon                                                                                                                          |                                      | [Type= diskret] [Format=numeric] [Rekkevidde= 1-4] [Missing=*]                                                                                      |                              |
| Statistikk [NW/ W]                                                                                                                   |                                      | [Gyldige=4689 /-] [Ugyldig=0 /-]                                                                                                                    |                              |
| Tekst før spørsmål                                                                                                                   |                                      | Hvor mange av de tre følgende påstandene er du enig i? Vi ønsker ikke å vite hvilke påstander, bare hvor mange.                                     |                              |
| Spørsmålstekst                                                                                                                       |                                      | Norge bør øke bistanden til de fattige.<br>Norge bør senke skatten på bensin og diesel.<br>Norge bør tillate at store selskaper forurenser miljøet. |                              |
| Instruksjoner til intervjueren                                                                                                       |                                      | [Spurt hvis ran24=2. ]                                                                                                                              |                              |
| Kommentarer                                                                                                                          |                                      | Hvor mange av de tre følgende påstandene er du enig i? Vi ønsker ikke å vite hvilke påstander, bare hvor mange. N                                   |                              |
| Verdi                                                                                                                                | Merkelapp                            | Enheter                                                                                                                                             | Prosent                      |
| 1                                                                                                                                    | 0                                    | 174                                                                                                                                                 | <div><div></div></div> 3.7%  |
| 2                                                                                                                                    | 1                                    | 462                                                                                                                                                 | <div><div></div></div> 9.9%  |
| 3                                                                                                                                    | 2                                    | 121                                                                                                                                                 | <div><div></div></div> 2.6%  |
| 4                                                                                                                                    | 3                                    | 11                                                                                                                                                  | <div><div></div></div> 0.2%  |
| 97                                                                                                                                   | Ikke svart                           | 10                                                                                                                                                  | <div><div></div></div> 0.2%  |
| 98                                                                                                                                   | Ikke spurt                           | 3911                                                                                                                                                | <div><div></div></div> 83.4% |
| Advarsel: disse tallene indikerer antall enheter (cases) i datafilen. De kan ikke tolkes som oppsummert statistikk for populasjonen. |                                      |                                                                                                                                                     |                              |
| # ocr7matc2a: Bør Norge la folk fra østeuropeiske land komme og bosette seg?                                                         |                                      |                                                                                                                                                     |                              |
| Informasjon                                                                                                                          |                                      | [Type= diskret] [Format=numeric] [Rekkevidde= 1-2] [Missing=*]                                                                                      |                              |
| Statistikk [NW/ W]                                                                                                                   |                                      | [Gyldige=4689 /-] [Ugyldig=0 /-]                                                                                                                    |                              |
| Spørsmålstekst                                                                                                                       |                                      | Synes du Norge bør la folk fra østeuropeiske land komme for å bosette seg her?                                                                      |                              |
| Instruksjoner til intervjueren                                                                                                       |                                      | [Spurt hvis ran24=2. ]                                                                                                                              |                              |
| Verdi                                                                                                                                | Merkelapp                            | Enheter                                                                                                                                             | Prosent                      |
| 1                                                                                                                                    | La komme for å bosette seg her.      | 428                                                                                                                                                 | <div><div></div></div> 9.1%  |
| 2                                                                                                                                    | Ikke la komme for å bosette seg her. | 316                                                                                                                                                 | <div><div></div></div> 6.7%  |
| 97                                                                                                                                   | Ikke svart                           | 34                                                                                                                                                  | <div><div></div></div> 0.7%  |
| 98                                                                                                                                   | Ikke spurt                           | 3911                                                                                                                                                | <div><div></div></div> 83.4% |
| Advarsel: disse tallene indikerer antall enheter (cases) i datafilen. De kan ikke tolkes som oppsummert statistikk for populasjonen. |                                      |                                                                                                                                                     |                              |
| # ocr7matc3: Enig i hvor mange av tre påstander: Øke bistand, senke skatt på drivstoff, tillate store selskapers forurensing         |                                      |                                                                                                                                                     |                              |
| Informasjon                                                                                                                          |                                      | [Type= diskret] [Format=numeric] [Rekkevidde= 1-4] [Missing=*]                                                                                      |                              |
| Statistikk [NW/ W]                                                                                                                   |                                      | [Gyldige=4689 /-] [Ugyldig=0 /-]                                                                                                                    |                              |
| Tekst før spørsmål                                                                                                                   |                                      | Hvor mange av de tre følgende påstandene er du enig i? Vi ønsker ikke å vite hvilke påstander, bare hvor mange.                                     |                              |
| Spørsmålstekst                                                                                                                       |                                      | Norge bør øke bistanden til de fattige.                                                                                                             |                              |

| # ocr7matc3: Enig i hvor mange av tre påstander: Øke bistand, senke skatt på drivstoff, tillate store selskapers forurensing         |                                                                                                                                                     |         |                              |
|--------------------------------------------------------------------------------------------------------------------------------------|-----------------------------------------------------------------------------------------------------------------------------------------------------|---------|------------------------------|
|                                                                                                                                      | Norge bør senke skatten på bensin og diesel.<br>Norge bør tillate at store selskaper forurensar miljøet.                                            |         |                              |
| Instruksjoner til intervjueren                                                                                                       | [Spurt hvis ran24=1 og ran24_1=2. ]                                                                                                                 |         |                              |
| Kommentarer                                                                                                                          | Hvor mange av de tre følgende påstandene er du enig i? Vi ønsker ikke å vite hvilke påstander, bare hvor mange. No                                  |         |                              |
| Verdi                                                                                                                                | Merkelapp                                                                                                                                           | Enheter | Prosent                      |
| 1                                                                                                                                    | 0                                                                                                                                                   | 48      | <div><div></div></div> 1.0%  |
| 2                                                                                                                                    | 1                                                                                                                                                   | 164     | <div><div></div></div> 3.5%  |
| 3                                                                                                                                    | 2                                                                                                                                                   | 40      | <div><div></div></div> 0.9%  |
| 4                                                                                                                                    | 3                                                                                                                                                   | 4       | <div><div></div></div> 0.1%  |
| 97                                                                                                                                   | Ikke svart                                                                                                                                          | 3       | <div><div></div></div> 0.1%  |
| 98                                                                                                                                   | Ikke spurt                                                                                                                                          | 4430    | <div><div></div></div> 94.5% |
| Advarsel: disse tallene indikerer antall enheter (cases) i datafilen. De kan ikke tolkes som oppsummert statistikk for populasjonen. |                                                                                                                                                     |         |                              |
| # ocr7matc3a: Bør Norge la immigranter fra muslimske land komme og bosette seg?                                                      |                                                                                                                                                     |         |                              |
| Informasjon                                                                                                                          | [Type= diskret] [Format=numeric] [Rekkevidde= 1-2] [Missing=*]                                                                                      |         |                              |
| Statistikk [NW/ W]                                                                                                                   | [Gyldige=4689 /-] [Ugyldig=0 /-]                                                                                                                    |         |                              |
| Spørsmålstekst                                                                                                                       | Synes du Norge bør la immigranter fra muslimske land komme for å bosette seg her?                                                                   |         |                              |
| Instruksjoner til intervjueren                                                                                                       | [Spurt hvis ran24=1 og ran24_1=2. ]                                                                                                                 |         |                              |
| Kommentarer                                                                                                                          | Synes du Norge bør la immigranter fra muslimske land komme for å bosette seg her?                                                                   |         |                              |
| Verdi                                                                                                                                | Merkelapp                                                                                                                                           | Enheter | Prosent                      |
| 1                                                                                                                                    | La komme for å bosette seg her.                                                                                                                     | 157     | <div><div></div></div> 3.3%  |
| 2                                                                                                                                    | Ikke la komme for å bosette seg her.                                                                                                                | 88      | <div><div></div></div> 1.9%  |
| 97                                                                                                                                   | Ikke svart                                                                                                                                          | 14      | <div><div></div></div> 0.3%  |
| 98                                                                                                                                   | Ikke spurt                                                                                                                                          | 4430    | <div><div></div></div> 94.5% |
| Advarsel: disse tallene indikerer antall enheter (cases) i datafilen. De kan ikke tolkes som oppsummert statistikk for populasjonen. |                                                                                                                                                     |         |                              |
| # ocr7matc4: Enig i hvor mange av tre påstander: Øke bistand, senke skatt på drivstoff, tillate store selskapers forurensing         |                                                                                                                                                     |         |                              |
| Informasjon                                                                                                                          | [Type= diskret] [Format=numeric] [Rekkevidde= 1-4] [Missing=*]                                                                                      |         |                              |
| Statistikk [NW/ W]                                                                                                                   | [Gyldige=4689 /-] [Ugyldig=0 /-]                                                                                                                    |         |                              |
| Tekst før spørsmål                                                                                                                   | Hvor mange av de tre følgende påstandene er du enig i? Vi ønsker ikke å vite hvilke påstander, bare hvor mange.                                     |         |                              |
| Spørsmålstekst                                                                                                                       | Norge bør øke bistanden til de fattige.<br>Norge bør senke skatten på bensin og diesel.<br>Norge bør tillate at store selskaper forurensar miljøet. |         |                              |
| Instruksjoner til intervjueren                                                                                                       | [Spurt hvis ran24=1 og ran24_1=3. ]                                                                                                                 |         |                              |
| Kommentarer                                                                                                                          | Hvor mange av de tre følgende påstandene er du enig i? Vi ønsker ikke å vite hvilke påstander, bare hvor mange. No                                  |         |                              |
| Verdi                                                                                                                                | Merkelapp                                                                                                                                           | Enheter | Prosent                      |
| 1                                                                                                                                    | 0                                                                                                                                                   | 44      | <div><div></div></div> 0.9%  |
| 2                                                                                                                                    | 1                                                                                                                                                   | 191     | <div><div></div></div> 4.1%  |
| 3                                                                                                                                    | 2                                                                                                                                                   | 43      | <div><div></div></div> 0.9%  |
| 4                                                                                                                                    | 3                                                                                                                                                   | 1       | <div><div></div></div> 0.0%  |
| 97                                                                                                                                   | Ikke svart                                                                                                                                          | 1       | <div><div></div></div> 0.0%  |
| 98                                                                                                                                   | Ikke spurt                                                                                                                                          | 4409    | <div><div></div></div> 94.0% |
| Advarsel: disse tallene indikerer antall enheter (cases) i datafilen. De kan ikke tolkes som oppsummert statistikk for populasjonen. |                                                                                                                                                     |         |                              |

| # ocr7matc4a: Bør Norge la flyktninger fra muslimske land komme og bosette seg?                                                                                    |                                                                                                                                                                                                                                                 |         |             |       |
|--------------------------------------------------------------------------------------------------------------------------------------------------------------------|-------------------------------------------------------------------------------------------------------------------------------------------------------------------------------------------------------------------------------------------------|---------|-------------|-------|
| Informasjon                                                                                                                                                        | [Type= diskret] [Format=numeric] [Rekkevidde= 1-2] [Missing=*]                                                                                                                                                                                  |         |             |       |
| Statistikk [NW/ W]                                                                                                                                                 | [Gyldige=4689 /-] [Ugyldig=0 /-]                                                                                                                                                                                                                |         |             |       |
| Spørsmålstekst                                                                                                                                                     | Synes du Norge bør la flyktninger fra muslimske land komme for å bosette seg her?                                                                                                                                                               |         |             |       |
| Instruksjoner til intervjueren                                                                                                                                     | [Spurt hvis ran24=1 og ran24_1=3. ]                                                                                                                                                                                                             |         |             |       |
| Kommentarer                                                                                                                                                        | Synes du Norge bør la flyktninger fra muslimske land komme for å bosette seg her?                                                                                                                                                               |         |             |       |
| Verdi                                                                                                                                                              | Merkelapp                                                                                                                                                                                                                                       | Enheter | Prosent     |       |
| 1                                                                                                                                                                  | La komme for å bosette seg her.                                                                                                                                                                                                                 | 186     | <div></div> | 4.0%  |
| 2                                                                                                                                                                  | Ikke la komme for å bosette seg her.                                                                                                                                                                                                            | 89      | <div></div> | 1.9%  |
| 97                                                                                                                                                                 | Ikke svart                                                                                                                                                                                                                                      | 5       | <div></div> | 0.1%  |
| 98                                                                                                                                                                 | Ikke spurt                                                                                                                                                                                                                                      | 4409    | <div></div> | 94.0% |
| Advarsel: disse tallene indikerer antall enheter (cases) i datafilen. De kan ikke tolkes som oppsummert statistikk for populasjonen.                               |                                                                                                                                                                                                                                                 |         |             |       |
| # ocr7matt1: Enig i hvor mange av fire påstander: Øke bistand, senke skatt på drivstoff, tillate store selskapers forurensing, folk fra muslimske land bosette     |                                                                                                                                                                                                                                                 |         |             |       |
| Informasjon                                                                                                                                                        | [Type= diskret] [Format=numeric] [Rekkevidde= 1-5] [Missing=*]                                                                                                                                                                                  |         |             |       |
| Statistikk [NW/ W]                                                                                                                                                 | [Gyldige=4689 /-] [Ugyldig=0 /-]                                                                                                                                                                                                                |         |             |       |
| Tekst før spørsmål                                                                                                                                                 | Hvor mange av de fire følgende påstandene er du enig i? Vi ønsker ikke å vite hvilke påstander, bare hvor mange.                                                                                                                                |         |             |       |
| Spørsmålstekst                                                                                                                                                     | <p>Norge bør øke bistanden til de fattige.</p> <p>Norge bør senke skatten på bensin og diesel.</p> <p>Norge bør tillate at store selskaper forurensar miljøet.</p> <p>Norge bør la folk fra muslimske land komme for å bosette seg her.</p>     |         |             |       |
| Instruksjoner til intervjueren                                                                                                                                     | [Spurt hvis ran24=3. ]                                                                                                                                                                                                                          |         |             |       |
| Kommentarer                                                                                                                                                        | Hvor mange av de fire følgende påstandene er du enig i? Vi ønsker ikke å vite hvilke påstander, bare hvor mange. N                                                                                                                              |         |             |       |
| Verdi                                                                                                                                                              | Merkelapp                                                                                                                                                                                                                                       | Enheter | Prosent     |       |
| 1                                                                                                                                                                  | 0                                                                                                                                                                                                                                               | 73      | <div></div> | 1.6%  |
| 2                                                                                                                                                                  | 1                                                                                                                                                                                                                                               | 288     | <div></div> | 6.1%  |
| 3                                                                                                                                                                  | 2                                                                                                                                                                                                                                               | 314     | <div></div> | 6.7%  |
| 4                                                                                                                                                                  | 3                                                                                                                                                                                                                                               | 47      | <div></div> | 1.0%  |
| 5                                                                                                                                                                  | 4                                                                                                                                                                                                                                               | 10      | <div></div> | 0.2%  |
| 97                                                                                                                                                                 | Ikke svart                                                                                                                                                                                                                                      | 16      | <div></div> | 0.3%  |
| 98                                                                                                                                                                 | Ikke spurt                                                                                                                                                                                                                                      | 3941    | <div></div> | 84.0% |
| Advarsel: disse tallene indikerer antall enheter (cases) i datafilen. De kan ikke tolkes som oppsummert statistikk for populasjonen.                               |                                                                                                                                                                                                                                                 |         |             |       |
| # ocr7matt2: Enig i hvor mange av fire påstander: Øke bistand, senke skatt på drivstoff, tillate store selskapers forurensing, folk fra østeuropeiske land bosette |                                                                                                                                                                                                                                                 |         |             |       |
| Informasjon                                                                                                                                                        | [Type= diskret] [Format=numeric] [Rekkevidde= 1-5] [Missing=*]                                                                                                                                                                                  |         |             |       |
| Statistikk [NW/ W]                                                                                                                                                 | [Gyldige=4689 /-] [Ugyldig=0 /-]                                                                                                                                                                                                                |         |             |       |
| Tekst før spørsmål                                                                                                                                                 | Hvor mange av de fire følgende påstandene er du enig i? Vi ønsker ikke å vite hvilke påstander, bare hvor mange.                                                                                                                                |         |             |       |
| Spørsmålstekst                                                                                                                                                     | <p>Norge bør øke bistanden til de fattige.</p> <p>Norge bør senke skatten på bensin og diesel.</p> <p>Norge bør tillate at store selskaper forurensar miljøet.</p> <p>Norge bør la folk fra østeuropeiske land komme for å bosette seg her.</p> |         |             |       |
| Instruksjoner til intervjueren                                                                                                                                     | [Spurt hvis ran24=4. ]                                                                                                                                                                                                                          |         |             |       |
| Kommentarer                                                                                                                                                        | Hvor mange av de fire følgende påstandene er du enig i? Vi ønsker ikke å vite hvilke påstander, bare hvor mange. N                                                                                                                              |         |             |       |

| # ocr7matt2: Enig i hvor mange av fire påstander: Øke bistand, senke skatt på drivstoff, tillate store selskapers forurensing, folk fra østeuropeiske land bosette    |                                                                                                                                                                                                                                                    |         |         |
|-----------------------------------------------------------------------------------------------------------------------------------------------------------------------|----------------------------------------------------------------------------------------------------------------------------------------------------------------------------------------------------------------------------------------------------|---------|---------|
| Verdi                                                                                                                                                                 | Merkelapp                                                                                                                                                                                                                                          | Enheter | Prosent |
| 1                                                                                                                                                                     | 0                                                                                                                                                                                                                                                  | 121     | 2.6%    |
| 2                                                                                                                                                                     | 1                                                                                                                                                                                                                                                  | 338     | 7.2%    |
| 3                                                                                                                                                                     | 2                                                                                                                                                                                                                                                  | 263     | 5.6%    |
| 4                                                                                                                                                                     | 3                                                                                                                                                                                                                                                  | 30      | 0.6%    |
| 5                                                                                                                                                                     | 4                                                                                                                                                                                                                                                  | 0       |         |
| 97                                                                                                                                                                    | Ikke svart                                                                                                                                                                                                                                         | 10      | 0.2%    |
| 98                                                                                                                                                                    | Ikke spurt                                                                                                                                                                                                                                         | 3927    | 83.7%   |
| Advarsel: disse tallene indikerer antall enheter (cases) i datafilen. De kan ikke tolkes som oppsummert statistikk for populasjonen.                                  |                                                                                                                                                                                                                                                    |         |         |
| # ocr7matt3: Enig i hvor mange av fire påstander: Øke bistand, senke skatt på drivstoff, tillate store selskapers forurensing, immigranter fra muslimske land bosette |                                                                                                                                                                                                                                                    |         |         |
| Informasjon                                                                                                                                                           | [Type= diskret] [Format=numeric] [Rekkevidde= 1-5] [Missing=*]                                                                                                                                                                                     |         |         |
| Statistikk [NW/ W]                                                                                                                                                    | [Gyldige=4689 /-] [Ugyldig=0 /-]                                                                                                                                                                                                                   |         |         |
| Tekst før spørsmål                                                                                                                                                    | Hvor mange av de fire følgende påstandene er du enig i? Vi ønsker ikke å vite hvilke påstander, bare hvor mange.                                                                                                                                   |         |         |
| Spørsmålstekst                                                                                                                                                        | <p>Norge bør øke bistanden til de fattige.</p> <p>Norge bør senke skatten på bensin og diesel.</p> <p>Norge bør tillate at store selskaper forurensar miljøet.</p> <p>Norge bør la immigranter fra muslimske land komme for å bosette seg her.</p> |         |         |
| Instruksjoner til intervjueren                                                                                                                                        | [Spurt hvis ran24=5. ]                                                                                                                                                                                                                             |         |         |
| Kommentarer                                                                                                                                                           | Hvor mange av de fire følgende påstandene er du enig i? Vi ønsker ikke å vite hvilke påstander, bare hvor mange. N                                                                                                                                 |         |         |
| Verdi                                                                                                                                                                 | Merkelapp                                                                                                                                                                                                                                          | Enheter | Prosent |
| 1                                                                                                                                                                     | 0                                                                                                                                                                                                                                                  | 103     | 2.2%    |
| 2                                                                                                                                                                     | 1                                                                                                                                                                                                                                                  | 312     | 6.7%    |
| 3                                                                                                                                                                     | 2                                                                                                                                                                                                                                                  | 283     | 6.0%    |
| 4                                                                                                                                                                     | 3                                                                                                                                                                                                                                                  | 30      | 0.6%    |
| 5                                                                                                                                                                     | 4                                                                                                                                                                                                                                                  | 4       | 0.1%    |
| 97                                                                                                                                                                    | Ikke svart                                                                                                                                                                                                                                         | 11      | 0.2%    |
| 98                                                                                                                                                                    | Ikke spurt                                                                                                                                                                                                                                         | 3946    | 84.2%   |
| Advarsel: disse tallene indikerer antall enheter (cases) i datafilen. De kan ikke tolkes som oppsummert statistikk for populasjonen.                                  |                                                                                                                                                                                                                                                    |         |         |
| # ocr7matt4: Enig i hvor mange av fire påstander: Øke bistand, senke skatt på drivstoff, tillate store selskapers forurensing, flyktninger fra muslimske land bosette |                                                                                                                                                                                                                                                    |         |         |
| Informasjon                                                                                                                                                           | [Type= diskret] [Format=numeric] [Rekkevidde= 1-5] [Missing=*]                                                                                                                                                                                     |         |         |
| Statistikk [NW/ W]                                                                                                                                                    | [Gyldige=4689 /-] [Ugyldig=0 /-]                                                                                                                                                                                                                   |         |         |
| Tekst før spørsmål                                                                                                                                                    | Hvor mange av de fire følgende påstandene er du enig i? Vi ønsker ikke å vite hvilke påstander, bare hvor mange.                                                                                                                                   |         |         |
| Spørsmålstekst                                                                                                                                                        | <p>Norge bør øke bistanden til de fattige.</p> <p>Norge bør senke skatten på bensin og diesel.</p> <p>Norge bør tillate at store selskaper forurensar miljøet.</p> <p>Norge bør la flyktninger fra muslimske land komme for å bosette seg her.</p> |         |         |
| Instruksjoner til intervjueren                                                                                                                                        | [Spurt hvis ran24=6. ]                                                                                                                                                                                                                             |         |         |
| Kommentarer                                                                                                                                                           | Hvor mange av de fire følgende påstandene er du enig i? Vi ønsker ikke å vite hvilke påstander, bare hvor mange. N                                                                                                                                 |         |         |
| Verdi                                                                                                                                                                 | Merkelapp                                                                                                                                                                                                                                          | Enheter | Prosent |
| 1                                                                                                                                                                     | 0                                                                                                                                                                                                                                                  | 89      | 1.9%    |
| 2                                                                                                                                                                     | 1                                                                                                                                                                                                                                                  | 281     | 6.0%    |

**# ocr7matt4: Enig i hvor mange av fire påstander: Øke bistand, senke skatt på drivstoff, tillate store selskapers forurensing, flyktninger fra muslimske land bosette**

| Verdi | Merkelapp  | Enheter | Prosent                      |
|-------|------------|---------|------------------------------|
| 3     | 2          | 346     | <div><div></div></div> 7.4%  |
| 4     | 3          | 32      | <div><div></div></div> 0.7%  |
| 5     | 4          | 10      | <div><div></div></div> 0.2%  |
| 97    | Ikke svart | 3       | <div><div></div></div> 0.1%  |
| 98    | Ikke spurt | 3928    | <div><div></div></div> 83.8% |

Advarsel: disse tallene indikerer antall enheter (cases) i datafilen. De kan ikke tolkes som oppsummert statistikk for populasjonen.

**# r7ran25: [Alle respondenter randomisert. ]**

|                                       |                                                                |
|---------------------------------------|----------------------------------------------------------------|
| <b>Informasjon</b>                    | [Type= diskret] [Format=numeric] [Rekkevidde= 1-5] [Missing=*] |
| <b>Statistikk [NW/ W]</b>             | [Gyldige=1078 /-] [Ugyldig=3611 /-]                            |
| <b>Instruksjoner til intervjueren</b> | [Alle respondenter randomisert. ]                              |

| Verdi   | Merkelapp | Enheter | Prosent                      |
|---------|-----------|---------|------------------------------|
| 1       | 1         | 207     | <div><div></div></div> 19.2% |
| 2       | 2         | 237     | <div><div></div></div> 22.0% |
| 3       | 3         | 211     | <div><div></div></div> 19.6% |
| 4       | 4         | 213     | <div><div></div></div> 19.8% |
| 5       | 5         | 210     | <div><div></div></div> 19.5% |
| Sysmiss |           | 3611    |                              |

Advarsel: disse tallene indikerer antall enheter (cases) i datafilen. De kan ikke tolkes som oppsummert statistikk for populasjonen.

**# r7ran26: [Alle respondenter randomisert. ]**

|                                       |                                                                |
|---------------------------------------|----------------------------------------------------------------|
| <b>Informasjon</b>                    | [Type= diskret] [Format=numeric] [Rekkevidde= 1-5] [Missing=*] |
| <b>Statistikk [NW/ W]</b>             | [Gyldige=1078 /-] [Ugyldig=3611 /-]                            |
| <b>Instruksjoner til intervjueren</b> | [Alle respondenter randomisert. ]                              |

| Verdi   | Merkelapp | Enheter | Prosent                      |
|---------|-----------|---------|------------------------------|
| 1       | 1         | 212     | <div><div></div></div> 19.7% |
| 2       | 2         | 216     | <div><div></div></div> 20.0% |
| 3       | 3         | 197     | <div><div></div></div> 18.3% |
| 4       | 4         | 220     | <div><div></div></div> 20.4% |
| 5       | 5         | 233     | <div><div></div></div> 21.6% |
| Sysmiss |           | 3611    |                              |

Advarsel: disse tallene indikerer antall enheter (cases) i datafilen. De kan ikke tolkes som oppsummert statistikk for populasjonen.

**# r7ran27: [Alle respondenter randomisert. ]**

|                                       |                                                                |
|---------------------------------------|----------------------------------------------------------------|
| <b>Informasjon</b>                    | [Type= diskret] [Format=numeric] [Rekkevidde= 1-5] [Missing=*] |
| <b>Statistikk [NW/ W]</b>             | [Gyldige=1078 /-] [Ugyldig=3611 /-]                            |
| <b>Instruksjoner til intervjueren</b> | [Alle respondenter randomisert. ]                              |

| Verdi | Merkelapp | Enheter | Prosent                      |
|-------|-----------|---------|------------------------------|
| 1     | 1         | 202     | <div><div></div></div> 18.7% |
| 2     | 2         | 209     | <div><div></div></div> 19.4% |
| 3     | 3         | 235     | <div><div></div></div> 21.8% |
| 4     | 4         | 231     | <div><div></div></div> 21.4% |
| 5     | 5         | 201     | <div><div></div></div> 18.6% |

| # r7ran27: [Alle respondenter randomisert. ]                                                                                         |                                                                |         |                   |
|--------------------------------------------------------------------------------------------------------------------------------------|----------------------------------------------------------------|---------|-------------------|
| Verdi                                                                                                                                | Merkelapp                                                      | Enheter | Prosent           |
| Sysmiss                                                                                                                              |                                                                | 3611    |                   |
| Advarsel: disse tallene indikerer antall enheter (cases) i datafilen. De kan ikke tolkes som oppsummert statistikk for populasjonen. |                                                                |         |                   |
| # r7ran28: [Alle respondenter randomisert. ]                                                                                         |                                                                |         |                   |
| Informasjon                                                                                                                          | [Type= diskret] [Format=numeric] [Rekkevidde= 1-5] [Missing=*] |         |                   |
| Statistikk [NW/ W]                                                                                                                   | [Gyldige=1078 /-] [Ugyldig=3611 /-]                            |         |                   |
| Instruksjoner til intervjueren                                                                                                       | [Alle respondenter randomisert. ]                              |         |                   |
| Verdi                                                                                                                                | Merkelapp                                                      | Enheter | Prosent           |
| 1                                                                                                                                    | 1                                                              | 233     | <div></div> 21.6% |
| 2                                                                                                                                    | 2                                                              | 205     | <div></div> 19.0% |
| 3                                                                                                                                    | 3                                                              | 203     | <div></div> 18.8% |
| 4                                                                                                                                    | 4                                                              | 213     | <div></div> 19.8% |
| 5                                                                                                                                    | 5                                                              | 224     | <div></div> 20.8% |
| Sysmiss                                                                                                                              |                                                                | 3611    |                   |
| Advarsel: disse tallene indikerer antall enheter (cases) i datafilen. De kan ikke tolkes som oppsummert statistikk for populasjonen. |                                                                |         |                   |
| # r7ran29: [Alle respondenter randomisert. ]                                                                                         |                                                                |         |                   |
| Informasjon                                                                                                                          | [Type= diskret] [Format=numeric] [Rekkevidde= 1-5] [Missing=*] |         |                   |
| Statistikk [NW/ W]                                                                                                                   | [Gyldige=1078 /-] [Ugyldig=3611 /-]                            |         |                   |
| Instruksjoner til intervjueren                                                                                                       | [Alle respondenter randomisert. ]                              |         |                   |
| Verdi                                                                                                                                | Merkelapp                                                      | Enheter | Prosent           |
| 1                                                                                                                                    | 1                                                              | 223     | <div></div> 20.7% |
| 2                                                                                                                                    | 2                                                              | 187     | <div></div> 17.3% |
| 3                                                                                                                                    | 3                                                              | 229     | <div></div> 21.2% |
| 4                                                                                                                                    | 4                                                              | 230     | <div></div> 21.3% |
| 5                                                                                                                                    | 5                                                              | 209     | <div></div> 19.4% |
| Sysmiss                                                                                                                              |                                                                | 3611    |                   |
| Advarsel: disse tallene indikerer antall enheter (cases) i datafilen. De kan ikke tolkes som oppsummert statistikk for populasjonen. |                                                                |         |                   |
| # r7ran30: [Alle respondenter randomisert. ]                                                                                         |                                                                |         |                   |
| Informasjon                                                                                                                          | [Type= diskret] [Format=numeric] [Rekkevidde= 1-5] [Missing=*] |         |                   |
| Statistikk [NW/ W]                                                                                                                   | [Gyldige=1078 /-] [Ugyldig=3611 /-]                            |         |                   |
| Instruksjoner til intervjueren                                                                                                       | [Alle respondenter randomisert. ]                              |         |                   |
| Verdi                                                                                                                                | Merkelapp                                                      | Enheter | Prosent           |
| 1                                                                                                                                    | 1                                                              | 199     | <div></div> 18.5% |
| 2                                                                                                                                    | 2                                                              | 209     | <div></div> 19.4% |
| 3                                                                                                                                    | 3                                                              | 224     | <div></div> 20.8% |
| 4                                                                                                                                    | 4                                                              | 214     | <div></div> 19.9% |
| 5                                                                                                                                    | 5                                                              | 232     | <div></div> 21.5% |
| Sysmiss                                                                                                                              |                                                                | 3611    |                   |
| Advarsel: disse tallene indikerer antall enheter (cases) i datafilen. De kan ikke tolkes som oppsummert statistikk for populasjonen. |                                                                |         |                   |
| # ocr7marinove1_1: Riktig å etterforske Gazprom                                                                                      |                                                                |         |                   |
| Informasjon                                                                                                                          | [Type= diskret] [Format=numeric] [Rekkevidde= 1-7] [Missing=*] |         |                   |

| # ocr7marinove1_1: Riktig å etterforske Gazprom                                                                                      |                                                                                                                                                                                                                      |         |         |
|--------------------------------------------------------------------------------------------------------------------------------------|----------------------------------------------------------------------------------------------------------------------------------------------------------------------------------------------------------------------|---------|---------|
| Statistikk [NW/ W]                                                                                                                   | [Gyldige=4689 /-] [Ugyldig=0 /-]                                                                                                                                                                                     |         |         |
| Tekst før spørsmål                                                                                                                   | I april 2015 innledet EU etterforskning av Gazproms forretningspraksis.                                                                                                                                              |         |         |
| Spørsmålstekst                                                                                                                       | Mener du at denne etterforskningen av den russiske energigiganten Gazprom er riktig?                                                                                                                                 |         |         |
| Instruksjoner til intervjueren                                                                                                       | [Spurt hvis u=3 og ran25=1. ]                                                                                                                                                                                        |         |         |
| Kommentarer                                                                                                                          | I april 2015 innledet EU etterforskning av Gazproms forretningspraksis. Mener du at denne etterforskningen av den russisk                                                                                            |         |         |
| Verdi                                                                                                                                | Merkelapp                                                                                                                                                                                                            | Enheter | Prosent |
| 1                                                                                                                                    | Veldig riktig                                                                                                                                                                                                        | 67      | 1.4%    |
| 2                                                                                                                                    | Litt riktig                                                                                                                                                                                                          | 33      | 0.7%    |
| 3                                                                                                                                    | Verken riktig eller uriktig                                                                                                                                                                                          | 15      | 0.3%    |
| 4                                                                                                                                    | Litt uriktig                                                                                                                                                                                                         | 5       | 0.1%    |
| 5                                                                                                                                    | Ikke riktig i det hele tatt                                                                                                                                                                                          | 2       | 0.0%    |
| 6                                                                                                                                    | Vet ikke                                                                                                                                                                                                             | 81      | 1.7%    |
| 7                                                                                                                                    | Ikke gitt                                                                                                                                                                                                            | 1       | 0.0%    |
| 97                                                                                                                                   | Ikke svart                                                                                                                                                                                                           | 3       | 0.1%    |
| 98                                                                                                                                   | Ikke spurt                                                                                                                                                                                                           | 4482    | 95.6%   |
| Advarsel: disse tallene indikerer antall enheter (cases) i datafilen. De kan ikke tolkes som oppsummert statistikk for populasjonen. |                                                                                                                                                                                                                      |         |         |
| # ocr7marinove1_2: Riktig å etterforske Gazprom: Satt konsernet under press                                                          |                                                                                                                                                                                                                      |         |         |
| Informasjon                                                                                                                          | [Type= diskret] [Format=numeric] [Rekkevidde= 1-7] [Missing=*]                                                                                                                                                       |         |         |
| Statistikk [NW/ W]                                                                                                                   | [Gyldige=4689 /-] [Ugyldig=0 /-]                                                                                                                                                                                     |         |         |
| Tekst før spørsmål                                                                                                                   | I april 2015 innledet EU etterforskning av Gazproms forretningspraksis. Dette satt det russiske energikonsernet under press og ga konsernets europeiske konkurrenter et fortrinn.                                    |         |         |
| Spørsmålstekst                                                                                                                       | Mener du at denne etterforskningen av den russiske energigiganten Gazprom er riktig?                                                                                                                                 |         |         |
| Instruksjoner til intervjueren                                                                                                       | [Spurt hvis u=3 og ran25=2. ]                                                                                                                                                                                        |         |         |
| Kommentarer                                                                                                                          | I april 2015 innledet EU etterforskning av Gazproms forretningspraksis. Dette satt det russiske energikonsernet under pr                                                                                             |         |         |
| Verdi                                                                                                                                | Merkelapp                                                                                                                                                                                                            | Enheter | Prosent |
| 1                                                                                                                                    | Veldig riktig                                                                                                                                                                                                        | 60      | 1.3%    |
| 2                                                                                                                                    | Litt riktig                                                                                                                                                                                                          | 51      | 1.1%    |
| 3                                                                                                                                    | Verken riktig eller uriktig                                                                                                                                                                                          | 27      | 0.6%    |
| 4                                                                                                                                    | Litt uriktig                                                                                                                                                                                                         | 7       | 0.1%    |
| 5                                                                                                                                    | Ikke riktig i det hele tatt                                                                                                                                                                                          | 8       | 0.2%    |
| 6                                                                                                                                    | Vet ikke                                                                                                                                                                                                             | 74      | 1.6%    |
| 7                                                                                                                                    | Ikke gitt                                                                                                                                                                                                            | 5       | 0.1%    |
| 97                                                                                                                                   | Ikke svart                                                                                                                                                                                                           | 5       | 0.1%    |
| 98                                                                                                                                   | Ikke spurt                                                                                                                                                                                                           | 4452    | 94.9%   |
| Advarsel: disse tallene indikerer antall enheter (cases) i datafilen. De kan ikke tolkes som oppsummert statistikk for populasjonen. |                                                                                                                                                                                                                      |         |         |
| # ocr7marinove1_3: Riktig å etterforske Gazprom: Satt konsernet under press ifølge Gazprom/russiske medier                           |                                                                                                                                                                                                                      |         |         |
| Informasjon                                                                                                                          | [Type= diskret] [Format=numeric] [Rekkevidde= 1-7] [Missing=*]                                                                                                                                                       |         |         |
| Statistikk [NW/ W]                                                                                                                   | [Gyldige=4689 /-] [Ugyldig=0 /-]                                                                                                                                                                                     |         |         |
| Tekst før spørsmål                                                                                                                   | I april 2015 innledet EU etterforskning av Gazproms forretningspraksis. Ifølge Gazprom og russiske medier satte dette det russiske energikonsernet under press og ga konsernets europeiske konkurrenter et fortrinn. |         |         |
| Spørsmålstekst                                                                                                                       | Mener du at denne etterforskningen av den russiske energigiganten Gazprom er riktig?                                                                                                                                 |         |         |
| Instruksjoner til intervjueren                                                                                                       | [Spurt hvis u=3 og ran25=3. ]                                                                                                                                                                                        |         |         |



| # ocr7marinove1_3: Riktig å etterforske Gazprom: Satt konsernet under press ifølge Gazprom/russiske medier                           |                             |                                                                                                                                                                                                                               |         |
|--------------------------------------------------------------------------------------------------------------------------------------|-----------------------------|-------------------------------------------------------------------------------------------------------------------------------------------------------------------------------------------------------------------------------|---------|
| Kommentarer                                                                                                                          |                             | I april 2015 innledet EU etterforskning av Gazproms forretningspraksis. Ifølge Gazprom og russiske medier satte dette de                                                                                                      |         |
| Verdi                                                                                                                                | Merkelapp                   | Enheter                                                                                                                                                                                                                       | Prosent |
| 1                                                                                                                                    | Veldig riktig               | 53                                                                                                                                                                                                                            | 1.1%    |
| 2                                                                                                                                    | Litt riktig                 | 44                                                                                                                                                                                                                            | 0.9%    |
| 3                                                                                                                                    | Verken riktig eller uriktig | 22                                                                                                                                                                                                                            | 0.5%    |
| 4                                                                                                                                    | Litt uriktig                | 1                                                                                                                                                                                                                             | 0.0%    |
| 5                                                                                                                                    | Ikke riktig i det hele tatt | 4                                                                                                                                                                                                                             | 0.1%    |
| 6                                                                                                                                    | Vet ikke                    | 78                                                                                                                                                                                                                            | 1.7%    |
| 7                                                                                                                                    | Ikke gitt                   | 2                                                                                                                                                                                                                             | 0.0%    |
| 97                                                                                                                                   | Ikke svart                  | 7                                                                                                                                                                                                                             | 0.1%    |
| 98                                                                                                                                   | Ikke spurt                  | 4478                                                                                                                                                                                                                          | 95.5%   |
| Advarsel: disse tallene indikerer antall enheter (cases) i datafilen. De kan ikke tolkes som oppsummert statistikk for populasjonen. |                             |                                                                                                                                                                                                                               |         |
| # ocr7marinove1_4: Riktig å etterforske Gazprom: Urettferdige priser i Øst-Europa                                                    |                             |                                                                                                                                                                                                                               |         |
| Informasjon                                                                                                                          |                             | [Type= diskret] [Format=numeric] [Rekkevidde= 1-7] [Missing=*]                                                                                                                                                                |         |
| Statistikk [NW/ W]                                                                                                                   |                             | [Gyldige=4689 /-] [Ugyldig=0 /-]                                                                                                                                                                                              |         |
| Tekst før spørsmål                                                                                                                   |                             | I april 2015 innledet EU etterforskning av Gazproms forretningspraksis. Det finnes indikasjoner på at Gazprom fastsatte urettferdige priser for østeuropeiske land.                                                           |         |
| Spørsmålstekst                                                                                                                       |                             | Mener du at denne etterforskningen av den russiske energigiganten Gazprom er riktig?                                                                                                                                          |         |
| Instruksjoner til intervjueren                                                                                                       |                             | [Spurt hvis u=3 og ran25=4. ]                                                                                                                                                                                                 |         |
| Kommentarer                                                                                                                          |                             | I april 2015 innledet EU etterforskning av Gazproms forretningspraksis. Det finnes indikasjoner på at Gazprom fastsatte                                                                                                       |         |
| Verdi                                                                                                                                | Merkelapp                   | Enheter                                                                                                                                                                                                                       | Prosent |
| 1                                                                                                                                    | Veldig riktig               | 64                                                                                                                                                                                                                            | 1.4%    |
| 2                                                                                                                                    | Litt riktig                 | 37                                                                                                                                                                                                                            | 0.8%    |
| 3                                                                                                                                    | Verken riktig eller uriktig | 19                                                                                                                                                                                                                            | 0.4%    |
| 4                                                                                                                                    | Litt uriktig                | 4                                                                                                                                                                                                                             | 0.1%    |
| 5                                                                                                                                    | Ikke riktig i det hele tatt | 4                                                                                                                                                                                                                             | 0.1%    |
| 6                                                                                                                                    | Vet ikke                    | 74                                                                                                                                                                                                                            | 1.6%    |
| 7                                                                                                                                    | Ikke gitt                   | 3                                                                                                                                                                                                                             | 0.1%    |
| 97                                                                                                                                   | Ikke svart                  | 8                                                                                                                                                                                                                             | 0.2%    |
| 98                                                                                                                                   | Ikke spurt                  | 4476                                                                                                                                                                                                                          | 95.5%   |
| Advarsel: disse tallene indikerer antall enheter (cases) i datafilen. De kan ikke tolkes som oppsummert statistikk for populasjonen. |                             |                                                                                                                                                                                                                               |         |
| # ocr7marinove1_5: Riktig å etterforske Gazprom: Urettferdige priser i Øst-Europa ifølge antitrustmyndigheter                        |                             |                                                                                                                                                                                                                               |         |
| Informasjon                                                                                                                          |                             | [Type= diskret] [Format=numeric] [Rekkevidde= 1-7] [Missing=*]                                                                                                                                                                |         |
| Statistikk [NW/ W]                                                                                                                   |                             | [Gyldige=4689 /-] [Ugyldig=0 /-]                                                                                                                                                                                              |         |
| Tekst før spørsmål                                                                                                                   |                             | I april 2015 innledet EU etterforskning av Gazproms forretningspraksis. Ifølge EUs antitrustmyndigheter og andre EU-institusjoner finnes det indikasjoner på at Gazprom fastsatte urettferdige priser for østeuropeiske land. |         |
| Spørsmålstekst                                                                                                                       |                             | Mener du at denne etterforskningen av den russiske energigiganten Gazprom er riktig?                                                                                                                                          |         |
| Instruksjoner til intervjueren                                                                                                       |                             | [Spurt hvis u=3 og ran25=5. ]                                                                                                                                                                                                 |         |
| Kommentarer                                                                                                                          |                             | I april 2015 innledet EU etterforskning av Gazproms forretningspraksis. Ifølge EUs antitrustmyndigheter og andre EU-inst                                                                                                      |         |
| Verdi                                                                                                                                | Merkelapp                   | Enheter                                                                                                                                                                                                                       | Prosent |
| 1                                                                                                                                    | Veldig riktig               | 74                                                                                                                                                                                                                            | 1.6%    |
| 2                                                                                                                                    | Litt riktig                 | 48                                                                                                                                                                                                                            | 1.0%    |

| # ocr7marinove1_5: Riktig å etterforske Gazprom: Urettferdige priser i Øst-Europa ifølge antitrustmyndigheter                        |                                                                                                                                                                           |         |         |
|--------------------------------------------------------------------------------------------------------------------------------------|---------------------------------------------------------------------------------------------------------------------------------------------------------------------------|---------|---------|
| Verdi                                                                                                                                | Merkelapp                                                                                                                                                                 | Enheter | Prosent |
| 3                                                                                                                                    | Verken riktig eller uriktig                                                                                                                                               | 12      | 0.3%    |
| 4                                                                                                                                    | Litt uriktig                                                                                                                                                              | 2       | 0.0%    |
| 5                                                                                                                                    | Ikke riktig i det hele tatt                                                                                                                                               | 2       | 0.0%    |
| 6                                                                                                                                    | Vet ikke                                                                                                                                                                  | 65      | 1.4%    |
| 7                                                                                                                                    | Ikke gitt                                                                                                                                                                 | 2       | 0.0%    |
| 97                                                                                                                                   | Ikke svart                                                                                                                                                                | 5       | 0.1%    |
| 98                                                                                                                                   | Ikke spurt                                                                                                                                                                | 4479    | 95.5%   |
| Advarsel: disse tallene indikerer antall enheter (cases) i datafilen. De kan ikke tolkes som oppsummert statistikk for populasjonen. |                                                                                                                                                                           |         |         |
| # ocr7marinove2_1: Vurdering økt militært nærvær Øst-Europa                                                                          |                                                                                                                                                                           |         |         |
| Informasjon                                                                                                                          | [Type= diskret] [Format=numeric] [Rekkevidde= 1-7] [Missing=*]                                                                                                            |         |         |
| Statistikk [NW/ W]                                                                                                                   | [Gyldige=4689 /-] [Ugyldig=0 /-]                                                                                                                                          |         |         |
| Tekst før spørsmål                                                                                                                   | I nær fremtid vil NATO øke militære styrker og militært utstyr i Øst-Europa betraktelig.                                                                                  |         |         |
| Spørsmålstekst                                                                                                                       | Hvordan vurderer du det økte militære nærværet i Øst-Europa?                                                                                                              |         |         |
| Instruksjoner til intervjueren                                                                                                       | [Spurt hvis u=3 og ran26=1. ]                                                                                                                                             |         |         |
| Kommentarer                                                                                                                          | I nær fremtid vil NATO øke militære styrker og militært utstyr i Øst-Europa betraktelig. Hvordan vurderer du det øk                                                       |         |         |
| Verdi                                                                                                                                | Merkelapp                                                                                                                                                                 | Enheter | Prosent |
| 1                                                                                                                                    | Veldig positivt                                                                                                                                                           | 20      | 0.4%    |
| 2                                                                                                                                    | Litt positivt                                                                                                                                                             | 42      | 0.9%    |
| 3                                                                                                                                    | Verken positivt eller negativt                                                                                                                                            | 35      | 0.7%    |
| 4                                                                                                                                    | Litt negativt                                                                                                                                                             | 58      | 1.2%    |
| 5                                                                                                                                    | Veldig negativt                                                                                                                                                           | 27      | 0.6%    |
| 6                                                                                                                                    | Vet ikke                                                                                                                                                                  | 26      | 0.6%    |
| 7                                                                                                                                    | Ikke gitt                                                                                                                                                                 | 1       | 0.0%    |
| 97                                                                                                                                   | Ikke svart                                                                                                                                                                | 3       | 0.1%    |
| 98                                                                                                                                   | Ikke spurt                                                                                                                                                                | 4477    | 95.5%   |
| Advarsel: disse tallene indikerer antall enheter (cases) i datafilen. De kan ikke tolkes som oppsummert statistikk for populasjonen. |                                                                                                                                                                           |         |         |
| # ocr7marinove2_2: Vurdering økt militært nærvær Øst-Europa: Kan eskalere små hendelser                                              |                                                                                                                                                                           |         |         |
| Informasjon                                                                                                                          | [Type= diskret] [Format=numeric] [Rekkevidde= 1-7] [Missing=*]                                                                                                            |         |         |
| Statistikk [NW/ W]                                                                                                                   | [Gyldige=4689 /-] [Ugyldig=0 /-]                                                                                                                                          |         |         |
| Tekst før spørsmål                                                                                                                   | I nær fremtid vil NATO øke militære styrker og militært utstyr i Øst-Europa betraktelig. En slik rask økning kan føre til at små hendelser eskalere til regionale kriger. |         |         |
| Spørsmålstekst                                                                                                                       | Hvordan vurderer du det økte militære nærværet i Øst-Europa?                                                                                                              |         |         |
| Instruksjoner til intervjueren                                                                                                       | [Spurt hvis u=3 og ran26=2. ]                                                                                                                                             |         |         |
| Kommentarer                                                                                                                          | I nær fremtid vil NATO øke militære styrker og militært utstyr i Øst-Europa betraktelig. En slik rask økning kan f                                                        |         |         |
| Verdi                                                                                                                                | Merkelapp                                                                                                                                                                 | Enheter | Prosent |
| 1                                                                                                                                    | Veldig positivt                                                                                                                                                           | 7       | 0.1%    |
| 2                                                                                                                                    | Litt positivt                                                                                                                                                             | 39      | 0.8%    |
| 3                                                                                                                                    | Verken positivt eller negativt                                                                                                                                            | 36      | 0.8%    |
| 4                                                                                                                                    | Litt negativt                                                                                                                                                             | 62      | 1.3%    |
| 5                                                                                                                                    | Veldig negativt                                                                                                                                                           | 41      | 0.9%    |
| 6                                                                                                                                    | Vet ikke                                                                                                                                                                  | 25      | 0.5%    |

| # ocr7marinove2_2: Vurdering økt militært nærvær Øst-Europa: Kan eskalere små hendelser                                              |                                                                                                                                                                                                                |         |         |
|--------------------------------------------------------------------------------------------------------------------------------------|----------------------------------------------------------------------------------------------------------------------------------------------------------------------------------------------------------------|---------|---------|
| Verdi                                                                                                                                | Merkelapp                                                                                                                                                                                                      | Enheter | Prosent |
| 7                                                                                                                                    | Ikke gitt                                                                                                                                                                                                      | 3       | 0.1%    |
| 97                                                                                                                                   | Ikke svart                                                                                                                                                                                                     | 3       | 0.1%    |
| 98                                                                                                                                   | Ikke spurt                                                                                                                                                                                                     | 4473    | 95.4%   |
| Advarsel: disse tallene indikerer antall enheter (cases) i datafilen. De kan ikke tolkes som oppsummert statistikk for populasjonen. |                                                                                                                                                                                                                |         |         |
| # ocr7marinove2_3: Vurdering økt militært nærvær Øst-Europa: Kan eskalere små hendelser i følge russiske eksperter                   |                                                                                                                                                                                                                |         |         |
| Informasjon                                                                                                                          | [Type= diskret] [Format=numeric] [Rekkevidde= 1-7] [Missing=*]                                                                                                                                                 |         |         |
| Statistikk [NW/ W]                                                                                                                   | [Gyldige=4689 /-] [Ugyldig=0 /-]                                                                                                                                                                               |         |         |
| Tekst før spørsmål                                                                                                                   | I nær fremtid vil NATO øke militære styrker og militært utstyr i Øst-Europa betraktelig. Russiske eksperter peker på at en slik rask økning kan føre til at selv små hendelser eskalerer til regionale kriger. |         |         |
| Spørsmålstekst                                                                                                                       | Hvordan vurderer du det økte militære nærværet i Øst-Europa?                                                                                                                                                   |         |         |
| Instruksjoner til intervjueren                                                                                                       | [Spurt hvis u=3 og ran26=3. ]                                                                                                                                                                                  |         |         |
| Kommentarer                                                                                                                          | I nær fremtid vil NATO øke militære styrker og militært utstyr i Øst-Europa betraktelig. Russiske eksperter peker p                                                                                            |         |         |
| Verdi                                                                                                                                | Merkelapp                                                                                                                                                                                                      | Enheter | Prosent |
| 1                                                                                                                                    | Veldig positivt                                                                                                                                                                                                | 10      | 0.2%    |
| 2                                                                                                                                    | Litt positivt                                                                                                                                                                                                  | 34      | 0.7%    |
| 3                                                                                                                                    | Verken positivt eller negativt                                                                                                                                                                                 | 28      | 0.6%    |
| 4                                                                                                                                    | Litt negativt                                                                                                                                                                                                  | 53      | 1.1%    |
| 5                                                                                                                                    | Veldig negativt                                                                                                                                                                                                | 51      | 1.1%    |
| 6                                                                                                                                    | Vet ikke                                                                                                                                                                                                       | 15      | 0.3%    |
| 7                                                                                                                                    | Ikke gitt                                                                                                                                                                                                      | 1       | 0.0%    |
| 97                                                                                                                                   | Ikke svart                                                                                                                                                                                                     | 5       | 0.1%    |
| 98                                                                                                                                   | Ikke spurt                                                                                                                                                                                                     | 4492    | 95.8%   |
| Advarsel: disse tallene indikerer antall enheter (cases) i datafilen. De kan ikke tolkes som oppsummert statistikk for populasjonen. |                                                                                                                                                                                                                |         |         |
| # ocr7marinove2_4: Vurdering økt militært nærvær Øst-Europa: Utformet som støtte til NATOs allierte                                  |                                                                                                                                                                                                                |         |         |
| Informasjon                                                                                                                          | [Type= diskret] [Format=numeric] [Rekkevidde= 1-7] [Missing=*]                                                                                                                                                 |         |         |
| Statistikk [NW/ W]                                                                                                                   | [Gyldige=4689 /-] [Ugyldig=0 /-]                                                                                                                                                                               |         |         |
| Tekst før spørsmål                                                                                                                   | I nær fremtid vil NATO øke militære styrker og militært utstyr i Øst-Europa betraktelig. Denne aksjonen er utformet for å støtte NATOs allierte i møte med russisk aggresjon i Øst-Ukraina.                    |         |         |
| Spørsmålstekst                                                                                                                       | Hvordan vurderer du det økte militære nærværet i Øst-Europa?                                                                                                                                                   |         |         |
| Instruksjoner til intervjueren                                                                                                       | [Spurt hvis u=3 og ran26=4. ]                                                                                                                                                                                  |         |         |
| Kommentarer                                                                                                                          | I nær fremtid vil NATO øke militære styrker og militært utstyr i Øst-Europa betraktelig. Denne aksjonen er utformet                                                                                            |         |         |
| Verdi                                                                                                                                | Merkelapp                                                                                                                                                                                                      | Enheter | Prosent |
| 1                                                                                                                                    | Veldig positivt                                                                                                                                                                                                | 23      | 0.5%    |
| 2                                                                                                                                    | Litt positivt                                                                                                                                                                                                  | 58      | 1.2%    |
| 3                                                                                                                                    | Verken positivt eller negativt                                                                                                                                                                                 | 38      | 0.8%    |
| 4                                                                                                                                    | Litt negativt                                                                                                                                                                                                  | 53      | 1.1%    |
| 5                                                                                                                                    | Veldig negativt                                                                                                                                                                                                | 23      | 0.5%    |
| 6                                                                                                                                    | Vet ikke                                                                                                                                                                                                       | 19      | 0.4%    |
| 7                                                                                                                                    | Ikke gitt                                                                                                                                                                                                      | 3       | 0.1%    |
| 97                                                                                                                                   | Ikke svart                                                                                                                                                                                                     | 3       | 0.1%    |
| 98                                                                                                                                   | Ikke spurt                                                                                                                                                                                                     | 4469    | 95.3%   |

| # ocr7marinove2_4: Vurdering økt militært nærvær Øst-Europa: Utformet som støtte til NATOs allierte                                     |                                                                                                                                                                                                                                               |         |         |
|-----------------------------------------------------------------------------------------------------------------------------------------|-----------------------------------------------------------------------------------------------------------------------------------------------------------------------------------------------------------------------------------------------|---------|---------|
| Advarsel: disse tallene indikerer antall enheter (cases) i datafilen. De kan ikke tolkes som oppsummert statistikk for populasjonen.    |                                                                                                                                                                                                                                               |         |         |
| # ocr7marinove2_5: Vurdering økt militært nærvær Øst-Europa: Utformet som støtte til NATOs allierte, påpekt av USAs utenriksdepartement |                                                                                                                                                                                                                                               |         |         |
| Informasjon                                                                                                                             | [Type= diskret] [Format=numeric] [Rekkevidde= 1-7] [Missing=*]                                                                                                                                                                                |         |         |
| Statistikk [NW/ W]                                                                                                                      | [Gyldige=4689 /-] [Ugyldig=0 /-]                                                                                                                                                                                                              |         |         |
| Tekst før spørsmål                                                                                                                      | I nær fremtid vil NATO øke militære styrker og militært utstyr i Øst-Europa betraktelig. Som det amerikanske utenriksdepartementet påpekte er denne aksjonen utformet for å støtte NATOs allierte i møte med russisk aggresjon i Øst-Ukraina. |         |         |
| Spørsmålstekst                                                                                                                          | Hvordan vurderer du det økte militære nærværet i Øst-Europa?                                                                                                                                                                                  |         |         |
| Instruksjoner til intervjueren                                                                                                          | [Spurt hvis u=3 og ran26=5. ]                                                                                                                                                                                                                 |         |         |
| Kommentarer                                                                                                                             | I nær fremtid vil NATO øke militære styrker og militært utstyr i Øst-Europa betraktelig. Som det amerikanske utenrik                                                                                                                          |         |         |
| Verdi                                                                                                                                   | Merkelapp                                                                                                                                                                                                                                     | Enheter | Prosent |
| 1                                                                                                                                       | Veldig positivt                                                                                                                                                                                                                               | 15      | 0.3%    |
| 2                                                                                                                                       | Litt positivt                                                                                                                                                                                                                                 | 56      | 1.2%    |
| 3                                                                                                                                       | Verken positivt eller negativt                                                                                                                                                                                                                | 34      | 0.7%    |
| 4                                                                                                                                       | Litt negativt                                                                                                                                                                                                                                 | 58      | 1.2%    |
| 5                                                                                                                                       | Veldig negativt                                                                                                                                                                                                                               | 39      | 0.8%    |
| 6                                                                                                                                       | Vet ikke                                                                                                                                                                                                                                      | 25      | 0.5%    |
| 7                                                                                                                                       | Ikke gitt                                                                                                                                                                                                                                     | 1       | 0.0%    |
| 97                                                                                                                                      | Ikke svart                                                                                                                                                                                                                                    | 5       | 0.1%    |
| 98                                                                                                                                      | Ikke spurt                                                                                                                                                                                                                                    | 4456    | 95.0%   |
| Advarsel: disse tallene indikerer antall enheter (cases) i datafilen. De kan ikke tolkes som oppsummert statistikk for populasjonen.    |                                                                                                                                                                                                                                               |         |         |
| # ocr7marinove3_1: Vurdering protestene som førte til Yanukovychs avgang                                                                |                                                                                                                                                                                                                                               |         |         |
| Informasjon                                                                                                                             | [Type= diskret] [Format=numeric] [Rekkevidde= 1-7] [Missing=*]                                                                                                                                                                                |         |         |
| Statistikk [NW/ W]                                                                                                                      | [Gyldige=4689 /-] [Ugyldig=0 /-]                                                                                                                                                                                                              |         |         |
| Tekst før spørsmål                                                                                                                      | I mars 2014 tvang massedemonstrasjoner den ukrainske presidenten Yanukovich til å gå av.                                                                                                                                                      |         |         |
| Spørsmålstekst                                                                                                                          | Hvordan vil du vurdere protestene som førte til president Yanukovychs avgang?                                                                                                                                                                 |         |         |
| Instruksjoner til intervjueren                                                                                                          | [Spurt hvis u=3 og ran27=1. ]                                                                                                                                                                                                                 |         |         |
| Kommentarer                                                                                                                             | I mars 2014 tvang massedemonstrasjoner den ukrainske presidenten Yanukovich til å gå av. Hvordan vil du vurdere protes                                                                                                                        |         |         |
| Verdi                                                                                                                                   | Merkelapp                                                                                                                                                                                                                                     | Enheter | Prosent |
| 1                                                                                                                                       | Veldig positivt                                                                                                                                                                                                                               | 25      | 0.5%    |
| 2                                                                                                                                       | Litt positivt                                                                                                                                                                                                                                 | 37      | 0.8%    |
| 3                                                                                                                                       | Verken positivt eller negativt                                                                                                                                                                                                                | 34      | 0.7%    |
| 4                                                                                                                                       | Litt negativt                                                                                                                                                                                                                                 | 7       | 0.1%    |
| 5                                                                                                                                       | Veldig negativt                                                                                                                                                                                                                               | 5       | 0.1%    |
| 6                                                                                                                                       | Vet ikke                                                                                                                                                                                                                                      | 79      | 1.7%    |
| 7                                                                                                                                       | Ikke gitt                                                                                                                                                                                                                                     | 8       | 0.2%    |
| 97                                                                                                                                      | Ikke svart                                                                                                                                                                                                                                    | 7       | 0.1%    |
| 98                                                                                                                                      | Ikke spurt                                                                                                                                                                                                                                    | 4487    | 95.7%   |
| Advarsel: disse tallene indikerer antall enheter (cases) i datafilen. De kan ikke tolkes som oppsummert statistikk for populasjonen.    |                                                                                                                                                                                                                                               |         |         |
| # ocr7marinove3_2: Vurdering protestene som førte til Yanukovychs avgang: Kupp for å fremme Vestens innflytelse                         |                                                                                                                                                                                                                                               |         |         |
| Informasjon                                                                                                                             | [Type= diskret] [Format=numeric] [Rekkevidde= 1-7] [Missing=*]                                                                                                                                                                                |         |         |
| Statistikk [NW/ W]                                                                                                                      | [Gyldige=4689 /-] [Ugyldig=0 /-]                                                                                                                                                                                                              |         |         |

| # ocr7marinove3_2: Vurdering protestene som førte til Yanukovychs avgang: Kupp for å fremme Vestens innflytelse                                                   |                                                                                                                                                                                                                                                                         |         |         |
|-------------------------------------------------------------------------------------------------------------------------------------------------------------------|-------------------------------------------------------------------------------------------------------------------------------------------------------------------------------------------------------------------------------------------------------------------------|---------|---------|
| <b>Tekst før spørsmål</b>                                                                                                                                         | I mars 2014 tvang massedemonstrasjoner den ukrainske presidenten Yanukovych til å gå av. Disse protestene og de etterfølgende hendelsene har blitt kalt et kupp, der et påskudd av å fremme demokrati er brukt for å utvide Vestens innflytelse.                        |         |         |
| <b>Spørsmålstekst</b>                                                                                                                                             | Hvordan vil du vurdere protestene som førte til president Yanukovychs avgang?                                                                                                                                                                                           |         |         |
| <b>Instruksjoner til intervjueren</b>                                                                                                                             | [Spurt hvis u=3 og ran27=2. ]                                                                                                                                                                                                                                           |         |         |
| <b>Kommentarer</b>                                                                                                                                                | I mars 2014 tvang massedemonstrasjoner den ukrainske presidenten Yanukovych til å gå av. Disse protestene og de etterf                                                                                                                                                  |         |         |
| Verdi                                                                                                                                                             | Merkelapp                                                                                                                                                                                                                                                               | Enheter | Prosent |
| 1                                                                                                                                                                 | Veldig positivt                                                                                                                                                                                                                                                         | 26      | 0.6%    |
| 2                                                                                                                                                                 | Litt positivt                                                                                                                                                                                                                                                           | 39      | 0.8%    |
| 3                                                                                                                                                                 | Verken positivt eller negativt                                                                                                                                                                                                                                          | 35      | 0.7%    |
| 4                                                                                                                                                                 | Litt negativt                                                                                                                                                                                                                                                           | 18      | 0.4%    |
| 5                                                                                                                                                                 | Veldig negativt                                                                                                                                                                                                                                                         | 6       | 0.1%    |
| 6                                                                                                                                                                 | Vet ikke                                                                                                                                                                                                                                                                | 71      | 1.5%    |
| 7                                                                                                                                                                 | Ikke gitt                                                                                                                                                                                                                                                               | 4       | 0.1%    |
| 97                                                                                                                                                                | Ikke svart                                                                                                                                                                                                                                                              | 10      | 0.2%    |
| 98                                                                                                                                                                | Ikke spurt                                                                                                                                                                                                                                                              | 4480    | 95.5%   |
| Advarsel: disse tallene indikerer antall enheter (cases) i datafilen. De kan ikke tolkes som oppsummert statistikk for populasjonen.                              |                                                                                                                                                                                                                                                                         |         |         |
| # ocr7marinove3_3: Vurdering protestene som førte til Yanukovychs avgang: Kupp for å fremme Vestens innflytelse ifølge russisk lederskap                          |                                                                                                                                                                                                                                                                         |         |         |
| <b>Informasjon</b>                                                                                                                                                | [Type= diskret] [Format=numeric] [Rekkevidde= 1-7] [Missing=*]                                                                                                                                                                                                          |         |         |
| <b>Statistikk [NW/ W]</b>                                                                                                                                         | [Gyldige=4689 /-] [Ugyldig=0 /-]                                                                                                                                                                                                                                        |         |         |
| <b>Tekst før spørsmål</b>                                                                                                                                         | I mars 2014 tvang massedemonstrasjoner den ukrainske presidenten Yanukovych til å gå av. Det russiske lederskapet har kalt disse protestene og de etterfølgende hendelsene for et kupp, der et påskudd av å fremme demokrati er brukt for å utvide Vestens innflytelse. |         |         |
| <b>Spørsmålstekst</b>                                                                                                                                             | Hvordan vil du vurdere protestene som førte til president Yanukovychs avgang?                                                                                                                                                                                           |         |         |
| <b>Instruksjoner til intervjueren</b>                                                                                                                             | [Spurt hvis u=3 og ran27=3. ]                                                                                                                                                                                                                                           |         |         |
| <b>Kommentarer</b>                                                                                                                                                | I mars 2014 tvang massedemonstrasjoner den ukrainske presidenten Yanukovych til å gå av. Det russiske lederskapet har k                                                                                                                                                 |         |         |
| Verdi                                                                                                                                                             | Merkelapp                                                                                                                                                                                                                                                               | Enheter | Prosent |
| 1                                                                                                                                                                 | Veldig positivt                                                                                                                                                                                                                                                         | 33      | 0.7%    |
| 2                                                                                                                                                                 | Litt positivt                                                                                                                                                                                                                                                           | 68      | 1.5%    |
| 3                                                                                                                                                                 | Verken positivt eller negativt                                                                                                                                                                                                                                          | 41      | 0.9%    |
| 4                                                                                                                                                                 | Litt negativt                                                                                                                                                                                                                                                           | 5       | 0.1%    |
| 5                                                                                                                                                                 | Veldig negativt                                                                                                                                                                                                                                                         | 10      | 0.2%    |
| 6                                                                                                                                                                 | Vet ikke                                                                                                                                                                                                                                                                | 65      | 1.4%    |
| 7                                                                                                                                                                 | Ikke gitt                                                                                                                                                                                                                                                               | 4       | 0.1%    |
| 97                                                                                                                                                                | Ikke svart                                                                                                                                                                                                                                                              | 9       | 0.2%    |
| 98                                                                                                                                                                | Ikke spurt                                                                                                                                                                                                                                                              | 4454    | 95.0%   |
| Advarsel: disse tallene indikerer antall enheter (cases) i datafilen. De kan ikke tolkes som oppsummert statistikk for populasjonen.                              |                                                                                                                                                                                                                                                                         |         |         |
| # ocr7marinove3_4: Vurdering protestene som førte til Yanukovychs avgang: Gjennomført av det ukrainske folk, førte til frie valg og åpnet et europeisk perspektiv |                                                                                                                                                                                                                                                                         |         |         |
| <b>Informasjon</b>                                                                                                                                                | [Type= diskret] [Format=numeric] [Rekkevidde= 1-7] [Missing=*]                                                                                                                                                                                                          |         |         |
| <b>Statistikk [NW/ W]</b>                                                                                                                                         | [Gyldige=4689 /-] [Ugyldig=0 /-]                                                                                                                                                                                                                                        |         |         |
| <b>Tekst før spørsmål</b>                                                                                                                                         | I mars 2014 tvang massedemonstrasjoner den ukrainske presidenten Yanukovych til å gå av. Disse protestene mot Yanukovych ble gjennomført av det ukrainske folk, førte til frie valg og åpnet et europeisk perspektiv for Ukraina.                                       |         |         |

| # ocr7marinove3_4: Vurdering protestene som førte til Yanukovychs avgang: Gjennomført av det ukrainske folk, førte til frie valg og åpnet et europeisk perspektiv                                         |                                                                                                                                                                                                                                                                                 |         |             |       |
|-----------------------------------------------------------------------------------------------------------------------------------------------------------------------------------------------------------|---------------------------------------------------------------------------------------------------------------------------------------------------------------------------------------------------------------------------------------------------------------------------------|---------|-------------|-------|
| Spørsmålstekst                                                                                                                                                                                            | Hvordan vil du vurdere protestene som førte til president Yanukovychs avgang?                                                                                                                                                                                                   |         |             |       |
| Instruksjoner til intervjueren                                                                                                                                                                            | [Spurt hvis u=3 og ran27=4. ]                                                                                                                                                                                                                                                   |         |             |       |
| Kommentarer                                                                                                                                                                                               | I mars 2014 tvang massedemonstrasjoner den ukrainske presidenten Yanukovych til å gå av. Disse protestene mot Yanukovyc                                                                                                                                                         |         |             |       |
| Verdi                                                                                                                                                                                                     | Merkelapp                                                                                                                                                                                                                                                                       | Enheter | Prosent     |       |
| 1                                                                                                                                                                                                         | Veldig positivt                                                                                                                                                                                                                                                                 | 84      | <div></div> | 1.8%  |
| 2                                                                                                                                                                                                         | Litt positivt                                                                                                                                                                                                                                                                   | 70      | <div></div> | 1.5%  |
| 3                                                                                                                                                                                                         | Verken positivt eller negativt                                                                                                                                                                                                                                                  | 20      | <div></div> | 0.4%  |
| 4                                                                                                                                                                                                         | Litt negativt                                                                                                                                                                                                                                                                   | 5       | <div></div> | 0.1%  |
| 5                                                                                                                                                                                                         | Veldig negativt                                                                                                                                                                                                                                                                 | 1       | <div></div> | 0.0%  |
| 6                                                                                                                                                                                                         | Vet ikke                                                                                                                                                                                                                                                                        | 40      | <div></div> | 0.9%  |
| 7                                                                                                                                                                                                         | Ikke gitt                                                                                                                                                                                                                                                                       | 4       | <div></div> | 0.1%  |
| 97                                                                                                                                                                                                        | Ikke svart                                                                                                                                                                                                                                                                      | 7       | <div></div> | 0.1%  |
| 98                                                                                                                                                                                                        | Ikke spurt                                                                                                                                                                                                                                                                      | 4458    | <div></div> | 95.1% |
| Advarsel: disse tallene indikerer antall enheter (cases) i datafilen. De kan ikke tolkes som oppsummert statistikk for populasjonen.                                                                      |                                                                                                                                                                                                                                                                                 |         |             |       |
| # ocr7marinove3_5: Vurdering protestene som førte til Yanukovychs avgang: Gjennomført av det ukrainske folk, førte til frie valg og åpnet et europeisk perspektiv, bemerket av norske/vestlige politikere |                                                                                                                                                                                                                                                                                 |         |             |       |
| Informasjon                                                                                                                                                                                               | [Type= diskret] [Format=numeric] [Rekkevidde= 1-7] [Missing=*]                                                                                                                                                                                                                  |         |             |       |
| Statistikk [NW/ W]                                                                                                                                                                                        | [Gyldige=4689 /-] [Ugyldig=0 /-]                                                                                                                                                                                                                                                |         |             |       |
| Tekst før spørsmål                                                                                                                                                                                        | I mars 2014 tvang massedemonstrasjoner den ukrainske presidenten Yanukovych til å gå av. Norske og andre vestlige politikere har bemerket at protestene mot Yanukovych ble gjennomført av det ukrainske folk, førte til frie valg og åpnet et europeisk perspektiv for Ukraina. |         |             |       |
| Spørsmålstekst                                                                                                                                                                                            | Hvordan vil du vurdere protestene som førte til president Yanukovychs avgang?                                                                                                                                                                                                   |         |             |       |
| Instruksjoner til intervjueren                                                                                                                                                                            | [Spurt hvis u=3 og ran27=5. ]                                                                                                                                                                                                                                                   |         |             |       |
| Kommentarer                                                                                                                                                                                               | I mars 2014 tvang massedemonstrasjoner den ukrainske presidenten Yanukovych til å gå av. Norske og andre vestlige polit                                                                                                                                                         |         |             |       |
| Verdi                                                                                                                                                                                                     | Merkelapp                                                                                                                                                                                                                                                                       | Enheter | Prosent     |       |
| 1                                                                                                                                                                                                         | Veldig positivt                                                                                                                                                                                                                                                                 | 49      | <div></div> | 1.0%  |
| 2                                                                                                                                                                                                         | Litt positivt                                                                                                                                                                                                                                                                   | 54      | <div></div> | 1.2%  |
| 3                                                                                                                                                                                                         | Verken positivt eller negativt                                                                                                                                                                                                                                                  | 26      | <div></div> | 0.6%  |
| 4                                                                                                                                                                                                         | Litt negativt                                                                                                                                                                                                                                                                   | 11      | <div></div> | 0.2%  |
| 5                                                                                                                                                                                                         | Veldig negativt                                                                                                                                                                                                                                                                 | 6       | <div></div> | 0.1%  |
| 6                                                                                                                                                                                                         | Vet ikke                                                                                                                                                                                                                                                                        | 47      | <div></div> | 1.0%  |
| 7                                                                                                                                                                                                         | Ikke gitt                                                                                                                                                                                                                                                                       | 3       | <div></div> | 0.1%  |
| 97                                                                                                                                                                                                        | Ikke svart                                                                                                                                                                                                                                                                      | 5       | <div></div> | 0.1%  |
| 98                                                                                                                                                                                                        | Ikke spurt                                                                                                                                                                                                                                                                      | 4488    | <div></div> | 95.7% |
| Advarsel: disse tallene indikerer antall enheter (cases) i datafilen. De kan ikke tolkes som oppsummert statistikk for populasjonen.                                                                      |                                                                                                                                                                                                                                                                                 |         |             |       |
| # ocr7marinove4_1: Troverdighetsgrad NATOs forpliktelse i å bistå Tyrkia                                                                                                                                  |                                                                                                                                                                                                                                                                                 |         |             |       |
| Informasjon                                                                                                                                                                                               | [Type= diskret] [Format=numeric] [Rekkevidde= 1-7] [Missing=*]                                                                                                                                                                                                                  |         |             |       |
| Statistikk [NW/ W]                                                                                                                                                                                        | [Gyldige=4689 /-] [Ugyldig=0 /-]                                                                                                                                                                                                                                                |         |             |       |
| Tekst før spørsmål                                                                                                                                                                                        | Tyrkia er avhengig av støtte fra NATO ved en eventuell militær konflikt med Russland.                                                                                                                                                                                           |         |             |       |
| Spørsmålstekst                                                                                                                                                                                            | Hvor troverdig mener du NATOs forpliktelse til å bistå Tyrkia er?                                                                                                                                                                                                               |         |             |       |
| Instruksjoner til intervjueren                                                                                                                                                                            | [Spurt hvis u=3 og ran28=1. ]                                                                                                                                                                                                                                                   |         |             |       |

| # ocr7marinove4_1: Troverdighetsgrad NATOs forpliktelse i å bistå Tyrkia                                                             |                        |                                                                                                                                                                                                                                                                                                                                                |         |
|--------------------------------------------------------------------------------------------------------------------------------------|------------------------|------------------------------------------------------------------------------------------------------------------------------------------------------------------------------------------------------------------------------------------------------------------------------------------------------------------------------------------------|---------|
| Kommentarer                                                                                                                          |                        | Tyrkia er avhengig av støtte fra NATO ved en eventuell militær konflikt med Russland. Hvor troverdig mener du NATOs fo                                                                                                                                                                                                                         |         |
| Verdi                                                                                                                                | Merkelapp              | Enheter                                                                                                                                                                                                                                                                                                                                        | Prosent |
| 1                                                                                                                                    | Veldig troverdig       | 13                                                                                                                                                                                                                                                                                                                                             | 0.3%    |
| 2                                                                                                                                    | Ganske troverdig       | 70                                                                                                                                                                                                                                                                                                                                             | 1.5%    |
| 3                                                                                                                                    | Delvis troverdig       | 70                                                                                                                                                                                                                                                                                                                                             | 1.5%    |
| 4                                                                                                                                    | Ganske utroverdig      | 30                                                                                                                                                                                                                                                                                                                                             | 0.6%    |
| 5                                                                                                                                    | Fullstendig utroverdig | 3                                                                                                                                                                                                                                                                                                                                              | 0.1%    |
| 6                                                                                                                                    | Vet ikke               | 40                                                                                                                                                                                                                                                                                                                                             | 0.9%    |
| 7                                                                                                                                    | Ikke gitt              | 2                                                                                                                                                                                                                                                                                                                                              | 0.0%    |
| 97                                                                                                                                   | Ikke svart             | 5                                                                                                                                                                                                                                                                                                                                              | 0.1%    |
| 98                                                                                                                                   | Ikke spurt             | 4456                                                                                                                                                                                                                                                                                                                                           | 95.0%   |
| Advarsel: disse tallene indikerer antall enheter (cases) i datafilen. De kan ikke tolkes som oppsummert statistikk for populasjonen. |                        |                                                                                                                                                                                                                                                                                                                                                |         |
| # ocr7marinove4_2: Troverdighetsgrad NATOs forpliktelse i å bistå Tyrkia: NATO kan nøle grunnet Erdogans politikk                    |                        |                                                                                                                                                                                                                                                                                                                                                |         |
| Informasjon                                                                                                                          |                        | [Type= diskret] [Format=numeric] [Rekkevidde= 1-7] [Missing=*]                                                                                                                                                                                                                                                                                 |         |
| Statistikk [NW/ W]                                                                                                                   |                        | [Gyldige=4689 /-] [Ugyldig=0 /-]                                                                                                                                                                                                                                                                                                               |         |
| Tekst før spørsmål                                                                                                                   |                        | Tyrkia er avhengig av støtte fra NATO ved en eventuell militær konflikt med Russland. Vestlige allierte har imidlertid i økende grad vært kritiske til den tyrkiske president Erdogans politikk. NATO kan derfor nøle med å intervenere hvis Tyrkia kommer i en militær konflikt med Russland om Syria.                                        |         |
| Spørsmålstekst                                                                                                                       |                        | Hvor troverdig mener du NATOs forpliktelse til å bistå Tyrkia er?                                                                                                                                                                                                                                                                              |         |
| Instruksjoner til intervjueren                                                                                                       |                        | [Spurt hvis u=3 og ran28=2. ]                                                                                                                                                                                                                                                                                                                  |         |
| Kommentarer                                                                                                                          |                        | Tyrkia er avhengig av støtte fra NATO ved en eventuell militær konflikt med Russland. Vestlige allierte har imidlertid                                                                                                                                                                                                                         |         |
| Verdi                                                                                                                                | Merkelapp              | Enheter                                                                                                                                                                                                                                                                                                                                        | Prosent |
| 1                                                                                                                                    | Veldig troverdig       | 11                                                                                                                                                                                                                                                                                                                                             | 0.2%    |
| 2                                                                                                                                    | Ganske troverdig       | 57                                                                                                                                                                                                                                                                                                                                             | 1.2%    |
| 3                                                                                                                                    | Delvis troverdig       | 52                                                                                                                                                                                                                                                                                                                                             | 1.1%    |
| 4                                                                                                                                    | Ganske utroverdig      | 31                                                                                                                                                                                                                                                                                                                                             | 0.7%    |
| 5                                                                                                                                    | Fullstendig utroverdig | 2                                                                                                                                                                                                                                                                                                                                              | 0.0%    |
| 6                                                                                                                                    | Vet ikke               | 41                                                                                                                                                                                                                                                                                                                                             | 0.9%    |
| 7                                                                                                                                    | Ikke gitt              | 5                                                                                                                                                                                                                                                                                                                                              | 0.1%    |
| 97                                                                                                                                   | Ikke svart             | 6                                                                                                                                                                                                                                                                                                                                              | 0.1%    |
| 98                                                                                                                                   | Ikke spurt             | 4484                                                                                                                                                                                                                                                                                                                                           | 95.6%   |
| Advarsel: disse tallene indikerer antall enheter (cases) i datafilen. De kan ikke tolkes som oppsummert statistikk for populasjonen. |                        |                                                                                                                                                                                                                                                                                                                                                |         |
| # ocr7marinove4_3: Troverdighetsgrad NATOs forpliktelse i å bistå Tyrkia: NATO kan nøle grunnet Erdogang ifølge russisk regjering    |                        |                                                                                                                                                                                                                                                                                                                                                |         |
| Informasjon                                                                                                                          |                        | [Type= diskret] [Format=numeric] [Rekkevidde= 1-7] [Missing=*]                                                                                                                                                                                                                                                                                 |         |
| Statistikk [NW/ W]                                                                                                                   |                        | [Gyldige=4689 /-] [Ugyldig=0 /-]                                                                                                                                                                                                                                                                                                               |         |
| Tekst før spørsmål                                                                                                                   |                        | Tyrkia er avhengig av støtte fra NATO ved en eventuell militær konflikt med Russland. Vestlige allierte har imidlertid i økende grad vært kritiske til den tyrkiske president Erdogans politikk. Den russiske regjeringen har derfor hevdet at NATO kan nøle med å intervenere hvis Tyrkia kommer i en militær konflikt med Russland om Syria. |         |
| Spørsmålstekst                                                                                                                       |                        | Hvor troverdig mener du NATOs forpliktelse til å bistå Tyrkia er?                                                                                                                                                                                                                                                                              |         |
| Instruksjoner til intervjueren                                                                                                       |                        | [Spurt hvis u=3 og ran28=3. ]                                                                                                                                                                                                                                                                                                                  |         |
| Kommentarer                                                                                                                          |                        | Tyrkia er avhengig av støtte fra NATO ved en eventuell militær konflikt med Russland. Vestlige allierte har imidlertid                                                                                                                                                                                                                         |         |

### # ocr7marinove4\_3: Troverdighetsgrad NATOs forpliktelse i å bistå Tyrkia: NATO kan nøle grunnet Erdogang ifølge russisk regjering

| Verdi | Merkelapp              | Enheter | Prosent |
|-------|------------------------|---------|---------|
| 1     | Veldig troverdig       | 17      | 0.4%    |
| 2     | Ganske troverdig       | 48      | 1.0%    |
| 3     | Delvis troverdig       | 62      | 1.3%    |
| 4     | Ganske utroverdig      | 12      | 0.3%    |
| 5     | Fullstendig utroverdig | 2       | 0.0%    |
| 6     | Vet ikke               | 53      | 1.1%    |
| 7     | Ikke gitt              | 2       | 0.0%    |
| 97    | Ikke svart             | 7       | 0.1%    |
| 98    | Ikke spurt             | 4486    | 95.7%   |

Advarsel: disse tallene indikerer antall enheter (cases) i datafilen. De kan ikke tolkes som oppsummert statistikk for populasjonen.

### # ocr7marinove4\_4: Troverdighetsgrad NATOs forpliktelse i å bistå Tyrkia: Alliansen aldri nektet støtte

|                                       |                                                                                                                                                                                                              |
|---------------------------------------|--------------------------------------------------------------------------------------------------------------------------------------------------------------------------------------------------------------|
| <b>Informasjon</b>                    | [Type= diskret] [Format=numeric] [Rekkevidde= 1-7] [Missing=*]                                                                                                                                               |
| <b>Statistikk [NW/ W]</b>             | [Gyldige=4689 /-] [Ugyldig=0 /-]                                                                                                                                                                             |
| <b>Tekst før spørsmål</b>             | Tyrkia er avhengig av støtte fra NATO ved en eventuell militær konflikt med Russland. I NATOs historie har det aldri vært en sak der alliansen har forsømt forpliktelsene sine og nektet å støtte et medlem. |
| <b>Spørsmålstekst</b>                 | Hvor troverdig mener du NATOs forpliktelse til å bistå Tyrkia er?                                                                                                                                            |
| <b>Instruksjoner til intervjueren</b> | [Spurt hvis u=3 og ran28=4. ]                                                                                                                                                                                |
| <b>Kommentarer</b>                    | Tyrkia er avhengig av støtte fra NATO ved en eventuell militær konflikt med Russland. I NATOs historie har det aldri v                                                                                       |

| Verdi | Merkelapp              | Enheter | Prosent |
|-------|------------------------|---------|---------|
| 1     | Veldig troverdig       | 25      | 0.5%    |
| 2     | Ganske troverdig       | 66      | 1.4%    |
| 3     | Delvis troverdig       | 56      | 1.2%    |
| 4     | Ganske utroverdig      | 21      | 0.4%    |
| 5     | Fullstendig utroverdig | 3       | 0.1%    |
| 6     | Vet ikke               | 38      | 0.8%    |
| 7     | Ikke gitt              | 1       | 0.0%    |
| 97    | Ikke svart             | 3       | 0.1%    |
| 98    | Ikke spurt             | 4476    | 95.5%   |

Advarsel: disse tallene indikerer antall enheter (cases) i datafilen. De kan ikke tolkes som oppsummert statistikk for populasjonen.

### # ocr7marinove4\_5: Troverdighetsgrad NATOs forpliktelse i å bistå Tyrkia: Alliansen aldri nektet støtte påpeker NATO-tjenestemenn

|                                       |                                                                                                                                                                                                                                           |
|---------------------------------------|-------------------------------------------------------------------------------------------------------------------------------------------------------------------------------------------------------------------------------------------|
| <b>Informasjon</b>                    | [Type= diskret] [Format=numeric] [Rekkevidde= 1-7] [Missing=*]                                                                                                                                                                            |
| <b>Statistikk [NW/ W]</b>             | [Gyldige=4689 /-] [Ugyldig=0 /-]                                                                                                                                                                                                          |
| <b>Tekst før spørsmål</b>             | Tyrkia er avhengig av støtte fra NATO ved en eventuell militær konflikt med Russland. NATO-tjenestemenn påpeker at i NATOs historie har det aldri vært en sak der alliansen har forsømt forpliktelsene sine og nektet å støtte et medlem. |
| <b>Spørsmålstekst</b>                 | Hvor troverdig mener du NATOs forpliktelse til å bistå Tyrkia er?                                                                                                                                                                         |
| <b>Instruksjoner til intervjueren</b> | [Spurt hvis u=3 og ran28=5. ]                                                                                                                                                                                                             |
| <b>Kommentarer</b>                    | Tyrkia er avhengig av støtte fra NATO ved en eventuell militær konflikt med Russland. NATO-tjenestemenn påpeker at i N                                                                                                                    |

| Verdi | Merkelapp        | Enheter | Prosent |
|-------|------------------|---------|---------|
| 1     | Veldig troverdig | 27      | 0.6%    |
| 2     | Ganske troverdig | 66      | 1.4%    |



## # ocr7marinove4\_5: Troverdighetsgrad NATOs forpliktelse i å bistå Tyrkia: Alliansen aldri nektet støtte påpeker NATO-tjenestemenn

| Verdi | Merkelapp              | Enheter | Prosent |
|-------|------------------------|---------|---------|
| 3     | Delvis troverdig       | 66      | 1.4%    |
| 4     | Ganske utroverdig      | 14      | 0.3%    |
| 5     | Fullstendig utroverdig | 2       | 0.0%    |
| 6     | Vet ikke               | 46      | 1.0%    |
| 7     | Ikke gitt              | 1       | 0.0%    |
| 97    | Ikke svart             | 2       | 0.0%    |
| 98    | Ikke spurt             | 4465    | 95.2%   |

Advarsel: disse tallene indikerer antall enheter (cases) i datafilen. De kan ikke tolkes som oppsummert statistikk for populasjonen.

## # ocr7marinove5\_1: Hvor ofte selvsensurerer mediene i Norge for ikke å sette migranter i dårlig lys

|                                       |                                                                                                                                                                                                          |
|---------------------------------------|----------------------------------------------------------------------------------------------------------------------------------------------------------------------------------------------------------|
| <b>Informasjon</b>                    | [Type= diskret] [Format=numeric] [Rekkevidde= 1-7] [Missing=*]                                                                                                                                           |
| <b>Statistikk [NW/ W]</b>             | [Gyldige=4689 /-] [Ugyldig=0 /-]                                                                                                                                                                         |
| <b>Tekst før spørsmål</b>             | Det kan være vanskelig å finne reportasjer i mediene om de dramatiske utfordringene med å integrere flyktninger og utlendinger, som de synlig innvandrerbefolkede områdene Rinkeby og Husby i Stockholm. |
| <b>Spørsmålstekst</b>                 | Hvor ofte tror du mediene i Norge selvsensurerer reportasjene sine slik at de ikke setter migranter i et dårlig lys?                                                                                     |
| <b>Instruksjoner til intervjueren</b> | [Spurt hvis u=3 og ran29=1. ]                                                                                                                                                                            |
| <b>Kommentarer</b>                    | Det kan være vanskelig å finne reportasjer i mediene om de dramatiske utfordringene med å integrere flyktninger og utl                                                                                   |

| Verdi | Merkelapp   | Enheter | Prosent |
|-------|-------------|---------|---------|
| 1     | Alltid      | 10      | 0.2%    |
| 2     | Ofte        | 49      | 1.0%    |
| 3     | Noen ganger | 79      | 1.7%    |
| 4     | Sjelden     | 41      | 0.9%    |
| 5     | Aldri       | 4       | 0.1%    |
| 6     | Vet ikke    | 35      | 0.7%    |
| 7     | Ikke gitt   | 0       |         |
| 97    | Ikke svart  | 5       | 0.1%    |
| 98    | Ikke spurt  | 4466    | 95.2%   |

Advarsel: disse tallene indikerer antall enheter (cases) i datafilen. De kan ikke tolkes som oppsummert statistikk for populasjonen.

## # ocr7marinove5\_2: Hvor ofte selvsensurerer mediene i Norge for ikke å sette migranter i dårlig lys: Kan beskyldes for rasisme, pressefriheten lider

|                                       |                                                                                                                                                                                                                                                                                                                                 |
|---------------------------------------|---------------------------------------------------------------------------------------------------------------------------------------------------------------------------------------------------------------------------------------------------------------------------------------------------------------------------------|
| <b>Informasjon</b>                    | [Type= diskret] [Format=numeric] [Rekkevidde= 1-7] [Missing=*]                                                                                                                                                                                                                                                                  |
| <b>Statistikk [NW/ W]</b>             | [Gyldige=4689 /-] [Ugyldig=0 /-]                                                                                                                                                                                                                                                                                                |
| <b>Tekst før spørsmål</b>             | Det kan være vanskelig å finne reportasjer i mediene om de dramatiske utfordringene med å integrere flyktninger og utlendinger, som de synlig innvandrerbefolkede områdene Rinkeby og Husby i Stockholm. Fordi medier som publiserer informasjon om problemet kan beskyldes for rasisme, har pressefriheten i Skandinavia lidd. |
| <b>Spørsmålstekst</b>                 | Hvor ofte tror du mediene i Norge selvsensurerer reportasjene sine slik at de ikke setter migranter i et dårlig lys?                                                                                                                                                                                                            |
| <b>Instruksjoner til intervjueren</b> | [Spurt hvis u=3 og ran29=2. ]                                                                                                                                                                                                                                                                                                   |
| <b>Kommentarer</b>                    | Det kan være vanskelig å finne reportasjer i mediene om de dramatiske utfordringene med å integrere flyktninger og utl                                                                                                                                                                                                          |

| Verdi | Merkelapp   | Enheter | Prosent |
|-------|-------------|---------|---------|
| 1     | Alltid      | 3       | 0.1%    |
| 2     | Ofte        | 43      | 0.9%    |
| 3     | Noen ganger | 78      | 1.7%    |

**# ocr7marinove5\_2: Hvor ofte selvsensurerer mediene i Norge for ikke å sette migranter i dårlig lys: Kan beskyldes for rasisme, pressefriheten lider**

| Verdi | Merkelapp  | Enheter | Prosent |
|-------|------------|---------|---------|
| 4     | Sjelden    | 32      | 0.7%    |
| 5     | Aldri      | 2       | 0.0%    |
| 6     | Vet ikke   | 26      | 0.6%    |
| 7     | Ikke gitt  | 1       | 0.0%    |
| 97    | Ikke svart | 2       | 0.0%    |
| 98    | Ikke spurt | 4502    | 96.0%   |

Advarsel: disse tallene indikerer antall enheter (cases) i datafilen. De kan ikke tolkes som oppsummert statistikk for populasjonen.

**# ocr7marinove5\_3: Hvor ofte selvsensurerer mediene i Norge for ikke å sette migranter i dårlig lys: Kan beskyldes for rasisme, pressefriheten lider antydnet av Sputnik**

|                                       |                                                                                                                                                                                                                                                                                                                                                                                                            |
|---------------------------------------|------------------------------------------------------------------------------------------------------------------------------------------------------------------------------------------------------------------------------------------------------------------------------------------------------------------------------------------------------------------------------------------------------------|
| <b>Informasjon</b>                    | [Type= diskret] [Format=numeric] [Rekkevidde= 1-7] [Missing=*]                                                                                                                                                                                                                                                                                                                                             |
| <b>Statistikk [NW/ W]</b>             | [Gyldige=4689 /-] [Ugyldig=0 /-]                                                                                                                                                                                                                                                                                                                                                                           |
| <b>Tekst før spørsmål</b>             | Det kan være vanskelig å finne reportasjer i mediene om de dramatiske utfordringene med å integrere flyktninger og utlendinger, som de synlig innvandrerbefolkede områdene Rinkeby og Husby i Stockholm. Sputnik, nyhetsbyrået grunnlagt av den russiske regjeringen, har antydnet at fordi medier som publiser informasjon om problemet kan beskyldes for rasisme, har pressefriheten i Skandinavia lidd. |
| <b>Spørsmålstekst</b>                 | Hvor ofte tror du mediene i Norge selvsensurerer reportasjene sine slik at de ikke setter migranter i et dårlig lys?                                                                                                                                                                                                                                                                                       |
| <b>Instruksjoner til intervjueren</b> | [Spurt hvis u=3 og ran29=3. ]                                                                                                                                                                                                                                                                                                                                                                              |
| <b>Kommentarer</b>                    | Det kan være vanskelig å finne reportasjer i mediene om de dramatiske utfordringene med å integrere flyktninger og utl                                                                                                                                                                                                                                                                                     |

| Verdi | Merkelapp   | Enheter | Prosent |
|-------|-------------|---------|---------|
| 1     | Alltid      | 8       | 0.2%    |
| 2     | Ofte        | 47      | 1.0%    |
| 3     | Noen ganger | 98      | 2.1%    |
| 4     | Sjelden     | 37      | 0.8%    |
| 5     | Aldri       | 8       | 0.2%    |
| 6     | Vet ikke    | 26      | 0.6%    |
| 7     | Ikke gitt   | 0       |         |
| 97    | Ikke svart  | 5       | 0.1%    |
| 98    | Ikke spurt  | 4460    | 95.1%   |

Advarsel: disse tallene indikerer antall enheter (cases) i datafilen. De kan ikke tolkes som oppsummert statistikk for populasjonen.

**# ocr7marinove5\_4: Hvor ofte selvsensurerer mediene i Norge for ikke å sette migranter i dårlig lys: NRK ærlig innblikk**

|                                       |                                                                                                                                                                                                                                                                                         |
|---------------------------------------|-----------------------------------------------------------------------------------------------------------------------------------------------------------------------------------------------------------------------------------------------------------------------------------------|
| <b>Informasjon</b>                    | [Type= diskret] [Format=numeric] [Rekkevidde= 1-7] [Missing=*]                                                                                                                                                                                                                          |
| <b>Statistikk [NW/ W]</b>             | [Gyldige=4689 /-] [Ugyldig=0 /-]                                                                                                                                                                                                                                                        |
| <b>Tekst før spørsmål</b>             | Det kan være vanskelig å finne reportasjer i mediene om de dramatiske utfordringene med å integrere flyktninger og utlendinger, som de synlig innvandrerbefolkede områdene Rinkeby og Husby i Stockholm. NRK har sendt et team og gitt et ærlig innblikk i forholdene i disse områdene. |
| <b>Spørsmålstekst</b>                 | Hvor ofte tror du mediene i Norge selvsensurerer reportasjene sine slik at de ikke setter migranter i et dårlig lys?                                                                                                                                                                    |
| <b>Instruksjoner til intervjueren</b> | [Spurt hvis u=3 og ran29=4. ]                                                                                                                                                                                                                                                           |
| <b>Kommentarer</b>                    | Det kan være vanskelig å finne reportasjer i mediene om de dramatiske utfordringene med å integrere flyktninger og utl                                                                                                                                                                  |

| Verdi | Merkelapp | Enheter | Prosent |
|-------|-----------|---------|---------|
| 1     | Alltid    | 7       | 0.1%    |
| 2     | Ofte      | 54      | 1.2%    |

| # ocr7marinove5_4: Hvor ofte selvsensurerer mediene i Norge for ikke å sette migranter i dårlig lys: NRK ærlig innblikk                 |                                                                                                                                                                                                                                                                                                                                                                                      |         |                        |         |
|-----------------------------------------------------------------------------------------------------------------------------------------|--------------------------------------------------------------------------------------------------------------------------------------------------------------------------------------------------------------------------------------------------------------------------------------------------------------------------------------------------------------------------------------|---------|------------------------|---------|
| Verdi                                                                                                                                   | Merkelapp                                                                                                                                                                                                                                                                                                                                                                            | Enheter |                        | Prosent |
| 3                                                                                                                                       | Noen ganger                                                                                                                                                                                                                                                                                                                                                                          | 92      | <div><div></div></div> | 2.0%    |
| 4                                                                                                                                       | Sjelden                                                                                                                                                                                                                                                                                                                                                                              | 45      | <div><div></div></div> | 1.0%    |
| 5                                                                                                                                       | Aldri                                                                                                                                                                                                                                                                                                                                                                                | 6       | <div><div></div></div> | 0.1%    |
| 6                                                                                                                                       | Vet ikke                                                                                                                                                                                                                                                                                                                                                                             | 23      | <div><div></div></div> | 0.5%    |
| 7                                                                                                                                       | Ikke gitt                                                                                                                                                                                                                                                                                                                                                                            | 0       | <div><div></div></div> |         |
| 97                                                                                                                                      | Ikke svart                                                                                                                                                                                                                                                                                                                                                                           | 3       | <div><div></div></div> | 0.1%    |
| 98                                                                                                                                      | Ikke spurt                                                                                                                                                                                                                                                                                                                                                                           | 4459    | <div><div></div></div> | 95.1%   |
| Advarsel: disse tallene indikerer antall enheter (cases) i datafilen. De kan ikke tolkes som oppsummert statistikk for populasjonen.    |                                                                                                                                                                                                                                                                                                                                                                                      |         |                        |         |
| # ocr7marinove5_5: Hvor ofte selvsensurerer mediene i Norge for ikke å sette migranter i dårlig lys: NRK innblikk, bevis på fritt media |                                                                                                                                                                                                                                                                                                                                                                                      |         |                        |         |
| Informasjon                                                                                                                             | [Type= diskret] [Format=numeric] [Rekkevidde= 1-7] [Missing=*]                                                                                                                                                                                                                                                                                                                       |         |                        |         |
| Statistikk [NW/ W]                                                                                                                      | [Gyldige=4689 /-] [Ugyldig=0 /-]                                                                                                                                                                                                                                                                                                                                                     |         |                        |         |
| Tekst før spørsmål                                                                                                                      | Det kan være vanskelig å finne reportasjer i mediene om utfordringene med å integrere flyktninger og utlendinger, synlig på steder som områdene Rinkeby og Husby i Stockholm. Medieeksperter peker på det faktum at den norske kanalen NRK har sendt et team og gitt et ærlig innblikk i forholdene i disse områdene, som et bevis på at medienes nyhetsrapportering er fri i Norge. |         |                        |         |
| Spørsmålstekst                                                                                                                          | Hvor ofte tror du mediene i Norge selvsensurerer reportasjene sine slik at de ikke setter migranter i et dårlig lys?                                                                                                                                                                                                                                                                 |         |                        |         |
| Instruksjoner til intervjueren                                                                                                          | [Spurt hvis u=3 og ran29=5. ]                                                                                                                                                                                                                                                                                                                                                        |         |                        |         |
| Kommentarer                                                                                                                             | Det kan være vanskelig å finne reportasjer i mediene om utfordringene med å integrere flyktninger og utlendinger, synl                                                                                                                                                                                                                                                               |         |                        |         |
| Verdi                                                                                                                                   | Merkelapp                                                                                                                                                                                                                                                                                                                                                                            | Enheter |                        | Prosent |
| 1                                                                                                                                       | Alltid                                                                                                                                                                                                                                                                                                                                                                               | 5       | <div><div></div></div> | 0.1%    |
| 2                                                                                                                                       | Ofte                                                                                                                                                                                                                                                                                                                                                                                 | 45      | <div><div></div></div> | 1.0%    |
| 3                                                                                                                                       | Noen ganger                                                                                                                                                                                                                                                                                                                                                                          | 85      | <div><div></div></div> | 1.8%    |
| 4                                                                                                                                       | Sjelden                                                                                                                                                                                                                                                                                                                                                                              | 27      | <div><div></div></div> | 0.6%    |
| 5                                                                                                                                       | Aldri                                                                                                                                                                                                                                                                                                                                                                                | 5       | <div><div></div></div> | 0.1%    |
| 6                                                                                                                                       | Vet ikke                                                                                                                                                                                                                                                                                                                                                                             | 35      | <div><div></div></div> | 0.7%    |
| 7                                                                                                                                       | Ikke gitt                                                                                                                                                                                                                                                                                                                                                                            | 0       | <div><div></div></div> |         |
| 97                                                                                                                                      | Ikke svart                                                                                                                                                                                                                                                                                                                                                                           | 7       | <div><div></div></div> | 0.1%    |
| 98                                                                                                                                      | Ikke spurt                                                                                                                                                                                                                                                                                                                                                                           | 4480    | <div><div></div></div> | 95.5%   |
| Advarsel: disse tallene indikerer antall enheter (cases) i datafilen. De kan ikke tolkes som oppsummert statistikk for populasjonen.    |                                                                                                                                                                                                                                                                                                                                                                                      |         |                        |         |
| # ocr7marinove6_1: Hvor berettiget er økning i forsvarsutgifter                                                                         |                                                                                                                                                                                                                                                                                                                                                                                      |         |                        |         |
| Informasjon                                                                                                                             | [Type= diskret] [Format=numeric] [Rekkevidde= 1-7] [Missing=*]                                                                                                                                                                                                                                                                                                                       |         |                        |         |
| Statistikk [NW/ W]                                                                                                                      | [Gyldige=4689 /-] [Ugyldig=0 /-]                                                                                                                                                                                                                                                                                                                                                     |         |                        |         |
| Tekst før spørsmål                                                                                                                      | Norges forsvarsdepartement har foreslått en langsiktig plan for landets forsvar, der forsvarsutgiftene vil øke med mer enn 160 milliarder NOK over de neste to tiårene.                                                                                                                                                                                                              |         |                        |         |
| Spørsmålstekst                                                                                                                          | Hvor berettiget mener du at en slik stor økning av forsvarsutgiftene er?                                                                                                                                                                                                                                                                                                             |         |                        |         |
| Instruksjoner til intervjueren                                                                                                          | [Spurt hvis u=3 og ran30=1. ]                                                                                                                                                                                                                                                                                                                                                        |         |                        |         |
| Kommentarer                                                                                                                             | Norges forsvarsdepartement har foreslått en langsiktig plan for landets forsvar, der forsvarsutgiftene vil øke med mer                                                                                                                                                                                                                                                               |         |                        |         |
| Verdi                                                                                                                                   | Merkelapp                                                                                                                                                                                                                                                                                                                                                                            | Enheter |                        | Prosent |
| 1                                                                                                                                       | Veldig berettiget                                                                                                                                                                                                                                                                                                                                                                    | 68      | <div><div></div></div> | 1.5%    |
| 2                                                                                                                                       | Litt berettiget                                                                                                                                                                                                                                                                                                                                                                      | 64      | <div><div></div></div> | 1.4%    |
| 3                                                                                                                                       | Verken berettiget eller uberettiget                                                                                                                                                                                                                                                                                                                                                  | 14      | <div><div></div></div> | 0.3%    |

| # ocr7marinove6_1: Hvor berettiget er økning i forsvarsutgifter                                                                      |                                                                                                                                                                                                                                                                                                                               |         |         |
|--------------------------------------------------------------------------------------------------------------------------------------|-------------------------------------------------------------------------------------------------------------------------------------------------------------------------------------------------------------------------------------------------------------------------------------------------------------------------------|---------|---------|
| Verdi                                                                                                                                | Merkelapp                                                                                                                                                                                                                                                                                                                     | Enheter | Prosent |
| 4                                                                                                                                    | Litt uberettiget                                                                                                                                                                                                                                                                                                              | 19      | 0.4%    |
| 5                                                                                                                                    | Fullstendig uberettiget                                                                                                                                                                                                                                                                                                       | 7       | 0.1%    |
| 6                                                                                                                                    | Vet ikke                                                                                                                                                                                                                                                                                                                      | 23      | 0.5%    |
| 7                                                                                                                                    | Ikke gitt                                                                                                                                                                                                                                                                                                                     | 0       |         |
| 97                                                                                                                                   | Ikke svart                                                                                                                                                                                                                                                                                                                    | 4       | 0.1%    |
| 98                                                                                                                                   | Ikke spurt                                                                                                                                                                                                                                                                                                                    | 4490    | 95.8%   |
| Advarsel: disse tallene indikerer antall enheter (cases) i datafilen. De kan ikke tolkes som oppsummert statistikk for populasjonen. |                                                                                                                                                                                                                                                                                                                               |         |         |
| # ocr7marinove6_2: Hvor berettiget er økning i forsvarsutgifter: Fremprovosere russisk oppbygging av militære styrker                |                                                                                                                                                                                                                                                                                                                               |         |         |
| Informasjon                                                                                                                          | [Type= diskret] [Format=numeric] [Rekkevidde= 1-7] [Missing=*]                                                                                                                                                                                                                                                                |         |         |
| Statistikk [NW/ W]                                                                                                                   | [Gyldige=4689 /-] [Ugyldig=0 /-]                                                                                                                                                                                                                                                                                              |         |         |
| Tekst før spørsmål                                                                                                                   | Norges forsvarsdepartement har foreslått en langsiktig plan for landets forsvar, der forsvarsutgiftene vil øke med mer enn 160 milliarder NOK over de neste to tiårene. En slik økning kan fremprovosere en oppbygging av militære styrker langs Russlands grenser i vest, som en defensiv reaksjon på Norges økte kapasitet. |         |         |
| Spørsmålstekst                                                                                                                       | Hvor berettiget mener du at en slik stor økning av forsvarsutgiftene er?                                                                                                                                                                                                                                                      |         |         |
| Instruksjoner til intervjueren                                                                                                       | [Spurt hvis u=3 og ran30=2. ]                                                                                                                                                                                                                                                                                                 |         |         |
| Kommentarer                                                                                                                          | Norges forsvarsdepartement har foreslått en langsiktig plan for landets forsvar, der forsvarsutgiftene vil øke med mer                                                                                                                                                                                                        |         |         |
| Verdi                                                                                                                                | Merkelapp                                                                                                                                                                                                                                                                                                                     | Enheter | Prosent |
| 1                                                                                                                                    | Veldig berettiget                                                                                                                                                                                                                                                                                                             | 49      | 1.0%    |
| 2                                                                                                                                    | Litt berettiget                                                                                                                                                                                                                                                                                                               | 67      | 1.4%    |
| 3                                                                                                                                    | Verken berettiget eller uberettiget                                                                                                                                                                                                                                                                                           | 26      | 0.6%    |
| 4                                                                                                                                    | Litt uberettiget                                                                                                                                                                                                                                                                                                              | 25      | 0.5%    |
| 5                                                                                                                                    | Fullstendig uberettiget                                                                                                                                                                                                                                                                                                       | 15      | 0.3%    |
| 6                                                                                                                                    | Vet ikke                                                                                                                                                                                                                                                                                                                      | 25      | 0.5%    |
| 7                                                                                                                                    | Ikke gitt                                                                                                                                                                                                                                                                                                                     | 1       | 0.0%    |
| 97                                                                                                                                   | Ikke svart                                                                                                                                                                                                                                                                                                                    | 1       | 0.0%    |
| 98                                                                                                                                   | Ikke spurt                                                                                                                                                                                                                                                                                                                    | 4480    | 95.5%   |
| Advarsel: disse tallene indikerer antall enheter (cases) i datafilen. De kan ikke tolkes som oppsummert statistikk for populasjonen. |                                                                                                                                                                                                                                                                                                                               |         |         |

| # ocr7marinove6_3: Hvor berettiget er økning i forsvarsutgifter: Fremprovosere russisk oppbygging av militære styrker, Lavrov advarer |                                                                                                                                                                                                                                                                                                                                                                                  |         |         |
|---------------------------------------------------------------------------------------------------------------------------------------|----------------------------------------------------------------------------------------------------------------------------------------------------------------------------------------------------------------------------------------------------------------------------------------------------------------------------------------------------------------------------------|---------|---------|
| Informasjon                                                                                                                           | [Type= diskret] [Format=numeric] [Rekkevidde= 1-7] [Missing=*]                                                                                                                                                                                                                                                                                                                   |         |         |
| Statistikk [NW/ W]                                                                                                                    | [Gyldige=4689 /-] [Ugyldig=0 /-]                                                                                                                                                                                                                                                                                                                                                 |         |         |
| Tekst før spørsmål                                                                                                                    | Norges forsvarsdepartement har foreslått en langsiktig plan for landets forsvar, der forsvarsutgiftene vil øke med mer enn 160 milliarder NOK over de neste to tiårene. Russlands utenriksminister Lavrov har advart om at en slik økning kan fremprovosere en oppbygging av militære styrker langs Russlands grenser i vest, som en defensiv reaksjon på Norges økte kapasitet. |         |         |
| Spørsmålstekst                                                                                                                        | Hvor berettiget mener du at en slik stor økning av forsvarsutgiftene er?                                                                                                                                                                                                                                                                                                         |         |         |
| Instruksjoner til intervjueren                                                                                                        | [Spurt hvis u=3 og ran30=3. ]                                                                                                                                                                                                                                                                                                                                                    |         |         |
| Kommentarer                                                                                                                           | Norges forsvarsdepartement har foreslått en langsiktig plan for landets forsvar, der forsvarsutgiftene vil øke med mer                                                                                                                                                                                                                                                           |         |         |
| Verdi                                                                                                                                 | Merkelapp                                                                                                                                                                                                                                                                                                                                                                        | Enheter | Prosent |
| 1                                                                                                                                     | Veldig berettiget                                                                                                                                                                                                                                                                                                                                                                | 52      | 1.1%    |
| 2                                                                                                                                     | Litt berettiget                                                                                                                                                                                                                                                                                                                                                                  | 74      | 1.6%    |
| 3                                                                                                                                     | Verken berettiget eller uberettiget                                                                                                                                                                                                                                                                                                                                              | 22      | 0.5%    |
| 4                                                                                                                                     | Litt uberettiget                                                                                                                                                                                                                                                                                                                                                                 | 29      | 0.6%    |
| 5                                                                                                                                     | Fullstendig uberettiget                                                                                                                                                                                                                                                                                                                                                          | 12      | 0.3%    |
| 6                                                                                                                                     | Vet ikke                                                                                                                                                                                                                                                                                                                                                                         | 34      | 0.7%    |
| 7                                                                                                                                     | Ikke gitt                                                                                                                                                                                                                                                                                                                                                                        | 0       |         |
| 97                                                                                                                                    | Ikke svart                                                                                                                                                                                                                                                                                                                                                                       | 1       | 0.0%    |
| 98                                                                                                                                    | Ikke spurt                                                                                                                                                                                                                                                                                                                                                                       | 4465    | 95.2%   |
| Advarsel: disse tallene indikerer antall enheter (cases) i datafilen. De kan ikke tolkes som oppsummert statistikk for populasjonen.  |                                                                                                                                                                                                                                                                                                                                                                                  |         |         |
| # ocr7marinove6_4: Hvor berettiget er økning i forsvarsutgifter: Nødvendig svar på Østersjøområdet                                    |                                                                                                                                                                                                                                                                                                                                                                                  |         |         |
| Informasjon                                                                                                                           | [Type= diskret] [Format=numeric] [Rekkevidde= 1-7] [Missing=*]                                                                                                                                                                                                                                                                                                                   |         |         |
| Statistikk [NW/ W]                                                                                                                    | [Gyldige=4689 /-] [Ugyldig=0 /-]                                                                                                                                                                                                                                                                                                                                                 |         |         |
| Tekst før spørsmål                                                                                                                    | Norges forsvarsdepartement har foreslått en langsiktig plan for landets forsvar, der forsvarsutgiftene vil øke med mer enn 160 milliarder NOK over de neste to tiårene. Tiltakene er et nødvendig svar på Russlands økende militære nærvær i Østersjøområdet og den forverrede sikkerhetssituasjonen.                                                                            |         |         |
| Spørsmålstekst                                                                                                                        | Hvor berettiget mener du at en slik stor økning av forsvarsutgiftene er?                                                                                                                                                                                                                                                                                                         |         |         |
| Instruksjoner til intervjueren                                                                                                        | [Spurt hvis u=3 og ran30=4. ]                                                                                                                                                                                                                                                                                                                                                    |         |         |
| Kommentarer                                                                                                                           | Norges forsvarsdepartement har foreslått en langsiktig plan for landets forsvar, der forsvarsutgiftene vil øke med mer                                                                                                                                                                                                                                                           |         |         |
| Verdi                                                                                                                                 | Merkelapp                                                                                                                                                                                                                                                                                                                                                                        | Enheter | Prosent |
| 1                                                                                                                                     | Veldig berettiget                                                                                                                                                                                                                                                                                                                                                                | 88      | 1.9%    |
| 2                                                                                                                                     | Litt berettiget                                                                                                                                                                                                                                                                                                                                                                  | 60      | 1.3%    |
| 3                                                                                                                                     | Verken berettiget eller uberettiget                                                                                                                                                                                                                                                                                                                                              | 11      | 0.2%    |
| 4                                                                                                                                     | Litt uberettiget                                                                                                                                                                                                                                                                                                                                                                 | 21      | 0.4%    |
| 5                                                                                                                                     | Fullstendig uberettiget                                                                                                                                                                                                                                                                                                                                                          | 12      | 0.3%    |
| 6                                                                                                                                     | Vet ikke                                                                                                                                                                                                                                                                                                                                                                         | 16      | 0.3%    |
| 7                                                                                                                                     | Ikke gitt                                                                                                                                                                                                                                                                                                                                                                        | 0       |         |
| 97                                                                                                                                    | Ikke svart                                                                                                                                                                                                                                                                                                                                                                       | 6       | 0.1%    |
| 98                                                                                                                                    | Ikke spurt                                                                                                                                                                                                                                                                                                                                                                       | 4475    | 95.4%   |
| Advarsel: disse tallene indikerer antall enheter (cases) i datafilen. De kan ikke tolkes som oppsummert statistikk for populasjonen.  |                                                                                                                                                                                                                                                                                                                                                                                  |         |         |
| # ocr7marinove6_5: Hvor berettiget er økning i forsvarsutgifter: Nødvendig svar på Østersjøområdet, norske sikkerhetseksperter        |                                                                                                                                                                                                                                                                                                                                                                                  |         |         |
| Informasjon                                                                                                                           | [Type= diskret] [Format=numeric] [Rekkevidde= 1-7] [Missing=*]                                                                                                                                                                                                                                                                                                                   |         |         |

| # ocr7marinove6_5: Hvor berettiget er økning i forsvarsutgifter: Nødvendig svar på Østersjøområdet, norske sikkerhetseksperter       |                                                                                                                                                                                                                                                                                                                                                     |         |         |
|--------------------------------------------------------------------------------------------------------------------------------------|-----------------------------------------------------------------------------------------------------------------------------------------------------------------------------------------------------------------------------------------------------------------------------------------------------------------------------------------------------|---------|---------|
| Statistikk [NW/ W]                                                                                                                   | [Gyldige=4689 /-] [Ugyldig=0 /-]                                                                                                                                                                                                                                                                                                                    |         |         |
| Tekst før spørsmål                                                                                                                   | Norges forsvarsdepartement har foreslått en langsiktig plan for landets forsvar, der forsvarsutgiftene vil øke med mer enn 160 milliarder NOK over de neste to tiårene. Norske sikkerhetseksperter har hevdet at en slik økning er et nødvendig svar på Russlands økende militære nærvær i Østersjøområdet og den forverrede sikkerhetssituasjonen. |         |         |
| Spørsmålstekst                                                                                                                       | Hvor berettiget mener du at en slik stor økning av forsvarsutgiftene er?                                                                                                                                                                                                                                                                            |         |         |
| Instruksjoner til intervjueren                                                                                                       | [Spurt hvis u=3 og ran30=5. ]                                                                                                                                                                                                                                                                                                                       |         |         |
| Kommentarer                                                                                                                          | Norges forsvarsdepartement har foreslått en langsiktig plan for landets forsvar, der forsvarsutgiftene vil øke med mer                                                                                                                                                                                                                              |         |         |
| Verdi                                                                                                                                | Merkelapp                                                                                                                                                                                                                                                                                                                                           | Enheter | Prosent |
| 1                                                                                                                                    | Veldig berettiget                                                                                                                                                                                                                                                                                                                                   | 81      | 1.7%    |
| 2                                                                                                                                    | Litt berettiget                                                                                                                                                                                                                                                                                                                                     | 85      | 1.8%    |
| 3                                                                                                                                    | Verken berettiget eller uberettiget                                                                                                                                                                                                                                                                                                                 | 21      | 0.4%    |
| 4                                                                                                                                    | Litt uberettiget                                                                                                                                                                                                                                                                                                                                    | 13      | 0.3%    |
| 5                                                                                                                                    | Fullstendig uberettiget                                                                                                                                                                                                                                                                                                                             | 8       | 0.2%    |
| 6                                                                                                                                    | Vet ikke                                                                                                                                                                                                                                                                                                                                            | 18      | 0.4%    |
| 7                                                                                                                                    | Ikke gitt                                                                                                                                                                                                                                                                                                                                           | 2       | 0.0%    |
| 97                                                                                                                                   | Ikke svart                                                                                                                                                                                                                                                                                                                                          | 4       | 0.1%    |
| 98                                                                                                                                   | Ikke spurt                                                                                                                                                                                                                                                                                                                                          | 4457    | 95.1%   |
| Advarsel: disse tallene indikerer antall enheter (cases) i datafilen. De kan ikke tolkes som oppsummert statistikk for populasjonen. |                                                                                                                                                                                                                                                                                                                                                     |         |         |
| # r7randomizedblockorder: randomizedBlockOrder                                                                                       |                                                                                                                                                                                                                                                                                                                                                     |         |         |
| Informasjon                                                                                                                          | [Type= diskret] [Format=character] [Missing=*]                                                                                                                                                                                                                                                                                                      |         |         |
| Statistikk [NW/ W]                                                                                                                   | [Gyldige=4689 /-] [Ugyldig=0 /-]                                                                                                                                                                                                                                                                                                                    |         |         |
| Instruksjoner til intervjueren                                                                                                       | [Lagrer rekkefølgen til OCR7MarinovE1-E6.]                                                                                                                                                                                                                                                                                                          |         |         |
| Verdi                                                                                                                                | Merkelapp                                                                                                                                                                                                                                                                                                                                           | Enheter | Prosent |
|                                                                                                                                      |                                                                                                                                                                                                                                                                                                                                                     | 3611    | 77.0%   |
| E1,E2,E3,E4,E5,E                                                                                                                     |                                                                                                                                                                                                                                                                                                                                                     | 1       | 0.0%    |
| E1,E2,E3,E4,E6,E                                                                                                                     |                                                                                                                                                                                                                                                                                                                                                     | 4       | 0.1%    |
| E1,E2,E3,E5,E6,E                                                                                                                     |                                                                                                                                                                                                                                                                                                                                                     | 2       | 0.0%    |
| E1,E2,E3,E6,E4,E                                                                                                                     |                                                                                                                                                                                                                                                                                                                                                     | 1       | 0.0%    |
| E1,E2,E4,E3,E5,E                                                                                                                     |                                                                                                                                                                                                                                                                                                                                                     | 2       | 0.0%    |
| E1,E2,E4,E5,E6,E                                                                                                                     |                                                                                                                                                                                                                                                                                                                                                     | 1       | 0.0%    |
| E1,E2,E4,E6,E5,E                                                                                                                     |                                                                                                                                                                                                                                                                                                                                                     | 3       | 0.1%    |
| E1,E2,E5,E3,E4,E                                                                                                                     |                                                                                                                                                                                                                                                                                                                                                     | 1       | 0.0%    |
| E1,E2,E5,E3,E6,E                                                                                                                     |                                                                                                                                                                                                                                                                                                                                                     | 3       | 0.1%    |
| E1,E2,E5,E4,E3,E                                                                                                                     |                                                                                                                                                                                                                                                                                                                                                     | 5       | 0.1%    |
| E1,E2,E5,E4,E6,E                                                                                                                     |                                                                                                                                                                                                                                                                                                                                                     | 1       | 0.0%    |
| E1,E2,E5,E6,E3,E                                                                                                                     |                                                                                                                                                                                                                                                                                                                                                     | 2       | 0.0%    |
| E1,E2,E5,E6,E4,E                                                                                                                     |                                                                                                                                                                                                                                                                                                                                                     | 4       | 0.1%    |
| E1,E2,E6,E3,E4,E                                                                                                                     |                                                                                                                                                                                                                                                                                                                                                     | 1       | 0.0%    |
| E1,E2,E6,E3,E5,E                                                                                                                     |                                                                                                                                                                                                                                                                                                                                                     | 1       | 0.0%    |
| E1,E2,E6,E5,E3,E                                                                                                                     |                                                                                                                                                                                                                                                                                                                                                     | 1       | 0.0%    |
| E1,E2,E6,E5,E4,E                                                                                                                     |                                                                                                                                                                                                                                                                                                                                                     | 2       | 0.0%    |
| E1,E3,E2,E4,E5,E                                                                                                                     |                                                                                                                                                                                                                                                                                                                                                     | 2       | 0.0%    |
| E1,E3,E2,E4,E6,E                                                                                                                     |                                                                                                                                                                                                                                                                                                                                                     | 2       | 0.0%    |

| # r7randomizedblockorder: randomizedBlockOrder |           |         |         |
|------------------------------------------------|-----------|---------|---------|
| Verdi                                          | Merkelapp | Enheter | Prosent |
| E1,E3,E2,E5,E6,F                               |           | 3       | 0.1%    |
| E1,E3,E2,E6,E5,F                               |           | 1       | 0.0%    |
| E1,E3,E4,E2,E5,F                               |           | 3       | 0.1%    |
| E1,E3,E4,E2,E6,F                               |           | 1       | 0.0%    |
| E1,E3,E4,E5,E6,F                               |           | 2       | 0.0%    |
| E1,E3,E4,E6,E5,F                               |           | 5       | 0.1%    |
| E1,E3,E5,E2,E4,F                               |           | 2       | 0.0%    |
| E1,E3,E5,E4,E6,F                               |           | 2       | 0.0%    |
| E1,E3,E5,E6,E2,F                               |           | 1       | 0.0%    |
| E1,E3,E5,E6,E4,F                               |           | 2       | 0.0%    |
| E1,E3,E6,E2,E4,F                               |           | 1       | 0.0%    |
| E1,E3,E6,E4,E5,F                               |           | 1       | 0.0%    |
| E1,E3,E6,E5,E2,F                               |           | 4       | 0.1%    |
| E1,E4,E2,E3,E5,F                               |           | 2       | 0.0%    |
| E1,E4,E2,E3,E6,F                               |           | 2       | 0.0%    |
| E1,E4,E2,E5,E3,F                               |           | 4       | 0.1%    |
| E1,E4,E2,E5,E6,F                               |           | 2       | 0.0%    |
| E1,E4,E3,E2,E5,F                               |           | 2       | 0.0%    |
| E1,E4,E3,E5,E2,F                               |           | 1       | 0.0%    |
| E1,E4,E3,E5,E6,F                               |           | 1       | 0.0%    |
| E1,E4,E3,E6,E2,F                               |           | 3       | 0.1%    |
| E1,E4,E3,E6,E5,F                               |           | 2       | 0.0%    |
| E1,E4,E5,E2,E3,F                               |           | 2       | 0.0%    |
| E1,E4,E5,E2,E6,F                               |           | 1       | 0.0%    |
| E1,E4,E5,E3,E2,F                               |           | 3       | 0.1%    |
| E1,E4,E5,E3,E6,F                               |           | 3       | 0.1%    |
| E1,E4,E5,E6,E2,F                               |           | 1       | 0.0%    |
| E1,E4,E5,E6,E3,F                               |           | 1       | 0.0%    |
| E1,E4,E6,E2,E3,F                               |           | 2       | 0.0%    |
| E1,E4,E6,E3,E2,F                               |           | 2       | 0.0%    |
| E1,E4,E6,E3,E5,F                               |           | 1       | 0.0%    |
| E1,E4,E6,E5,E2,F                               |           | 1       | 0.0%    |
| E1,E4,E6,E5,E3,F                               |           | 3       | 0.1%    |
| E1,E5,E2,E3,E4,F                               |           | 2       | 0.0%    |
| E1,E5,E2,E3,E6,F                               |           | 1       | 0.0%    |
| E1,E5,E2,E4,E3,F                               |           | 2       | 0.0%    |
| E1,E5,E2,E4,E6,F                               |           | 2       | 0.0%    |
| E1,E5,E2,E6,E3,F                               |           | 2       | 0.0%    |
| E1,E5,E2,E6,E4,F                               |           | 1       | 0.0%    |
| E1,E5,E3,E2,E4,F                               |           | 2       | 0.0%    |
| E1,E5,E3,E2,E6,F                               |           | 1       | 0.0%    |
| E1,E5,E3,E4,E2,F                               |           | 4       | 0.1%    |
| E1,E5,E3,E6,E2,F                               |           | 1       | 0.0%    |
| E1,E5,E3,E6,E4,F                               |           | 1       | 0.0%    |
| E1,E5,E4,E2,E3,F                               |           | 5       | 0.1%    |

| # r7randomizedblockorder: randomizedBlockOrder |           |         |         |
|------------------------------------------------|-----------|---------|---------|
| Verdi                                          | Merkelapp | Enheter | Prosent |
| E1,E5,E4,E3,E2,F                               |           | 3       | 0.1%    |
| E1,E5,E4,E3,E6,F                               |           | 1       | 0.0%    |
| E1,E5,E4,E6,E2,F                               |           | 1       | 0.0%    |
| E1,E5,E4,E6,E3,F                               |           | 1       | 0.0%    |
| E1,E5,E6,E2,E3,F                               |           | 1       | 0.0%    |
| E1,E5,E6,E2,E4,F                               |           | 1       | 0.0%    |
| E1,E5,E6,E3,E4,F                               |           | 1       | 0.0%    |
| E1,E5,E6,E4,E3,F                               |           | 2       | 0.0%    |
| E1,E6,E2,E3,E4,F                               |           | 2       | 0.0%    |
| E1,E6,E2,E3,E5,F                               |           | 4       | 0.1%    |
| E1,E6,E2,E4,E5,F                               |           | 1       | 0.0%    |
| E1,E6,E3,E2,E4,F                               |           | 1       | 0.0%    |
| E1,E6,E3,E2,E5,F                               |           | 2       | 0.0%    |
| E1,E6,E3,E4,E2,F                               |           | 1       | 0.0%    |
| E1,E6,E3,E5,E2,F                               |           | 6       | 0.1%    |
| E1,E6,E3,E5,E4,F                               |           | 5       | 0.1%    |
| E1,E6,E4,E2,E3,F                               |           | 1       | 0.0%    |
| E1,E6,E4,E2,E5,F                               |           | 1       | 0.0%    |
| E1,E6,E4,E3,E2,F                               |           | 1       | 0.0%    |
| E1,E6,E4,E3,E5,F                               |           | 2       | 0.0%    |
| E1,E6,E4,E5,E2,F                               |           | 2       | 0.0%    |
| E1,E6,E4,E5,E3,F                               |           | 2       | 0.0%    |
| E1,E6,E5,E2,E4,F                               |           | 1       | 0.0%    |
| E1,E6,E5,E3,E2,F                               |           | 2       | 0.0%    |
| E1,E6,E5,E4,E2,F                               |           | 2       | 0.0%    |
| E1,E6,E5,E4,E3,F                               |           | 2       | 0.0%    |
| E2,E1,E3,E4,E5,F                               |           | 2       | 0.0%    |
| E2,E1,E3,E4,E6,F                               |           | 1       | 0.0%    |
| E2,E1,E3,E5,E4,F                               |           | 2       | 0.0%    |
| E2,E1,E3,E5,E6,F                               |           | 1       | 0.0%    |
| E2,E1,E3,E6,E4,F                               |           | 1       | 0.0%    |
| E2,E1,E3,E6,E5,F                               |           | 1       | 0.0%    |
| E2,E1,E4,E3,E5,F                               |           | 1       | 0.0%    |
| E2,E1,E4,E3,E6,F                               |           | 1       | 0.0%    |
| E2,E1,E4,E5,E3,F                               |           | 1       | 0.0%    |
| E2,E1,E4,E6,E5,F                               |           | 1       | 0.0%    |
| E2,E1,E5,E3,E4,F                               |           | 1       | 0.0%    |
| E2,E1,E5,E3,E6,F                               |           | 1       | 0.0%    |
| E2,E1,E5,E4,E3,F                               |           | 2       | 0.0%    |
| E2,E1,E5,E6,E4,F                               |           | 1       | 0.0%    |
| E2,E1,E6,E3,E4,F                               |           | 1       | 0.0%    |
| E2,E1,E6,E4,E3,F                               |           | 4       | 0.1%    |
| E2,E1,E6,E4,E5,F                               |           | 1       | 0.0%    |
| E2,E1,E6,E5,E3,F                               |           | 1       | 0.0%    |
| E2,E3,E1,E4,E5,F                               |           | 2       | 0.0%    |



# # r7randomizedblockorder: randomizedBlockOrder

| Verdi            | Merkelapp | Enheter | Prosent |
|------------------|-----------|---------|---------|
| E2,E3,E1,E5,E4,F |           | 4       | 0.1%    |
| E2,E3,E1,E6,E4,F |           | 1       | 0.0%    |
| E2,E3,E4,E1,E5,F |           | 2       | 0.0%    |
| E2,E3,E4,E1,E6,F |           | 2       | 0.0%    |
| E2,E3,E4,E5,E1,F |           | 2       | 0.0%    |
| E2,E3,E4,E6,E1,F |           | 1       | 0.0%    |
| E2,E3,E5,E1,E4,F |           | 1       | 0.0%    |
| E2,E3,E5,E1,E6,F |           | 3       | 0.1%    |
| E2,E3,E5,E4,E6,F |           | 2       | 0.0%    |
| E2,E3,E5,E6,E1,F |           | 2       | 0.0%    |
| E2,E3,E5,E6,E4,F |           | 3       | 0.1%    |
| E2,E3,E6,E1,E4,F |           | 1       | 0.0%    |
| E2,E3,E6,E1,E5,F |           | 3       | 0.1%    |
| E2,E3,E6,E4,E5,F |           | 3       | 0.1%    |
| E2,E3,E6,E5,E1,F |           | 4       | 0.1%    |
| E2,E4,E1,E3,E5,F |           | 1       | 0.0%    |
| E2,E4,E1,E3,E6,F |           | 3       | 0.1%    |
| E2,E4,E1,E5,E3,F |           | 1       | 0.0%    |
| E2,E4,E1,E5,E6,F |           | 3       | 0.1%    |
| E2,E4,E1,E6,E3,F |           | 1       | 0.0%    |
| E2,E4,E1,E6,E5,F |           | 1       | 0.0%    |
| E2,E4,E3,E1,E5,F |           | 2       | 0.0%    |
| E2,E4,E3,E5,E6,F |           | 2       | 0.0%    |
| E2,E4,E3,E6,E5,F |           | 1       | 0.0%    |
| E2,E4,E5,E1,E6,F |           | 2       | 0.0%    |
| E2,E4,E5,E6,E1,F |           | 1       | 0.0%    |
| E2,E4,E5,E6,E3,F |           | 2       | 0.0%    |
| E2,E4,E6,E1,E5,F |           | 3       | 0.1%    |
| E2,E4,E6,E3,E5,F |           | 1       | 0.0%    |
| E2,E4,E6,E5,E1,F |           | 1       | 0.0%    |
| E2,E4,E6,E5,E3,F |           | 2       | 0.0%    |
| E2,E5,E1,E3,E4,F |           | 3       | 0.1%    |
| E2,E5,E1,E4,E6,F |           | 1       | 0.0%    |
| E2,E5,E1,E6,E3,F |           | 2       | 0.0%    |
| E2,E5,E3,E1,E6,F |           | 2       | 0.0%    |
| E2,E5,E3,E4,E1,F |           | 2       | 0.0%    |
| E2,E5,E3,E6,E1,F |           | 1       | 0.0%    |
| E2,E5,E3,E6,E4,F |           | 1       | 0.0%    |
| E2,E5,E4,E1,E3,F |           | 2       | 0.0%    |
| E2,E5,E4,E1,E6,F |           | 1       | 0.0%    |
| E2,E5,E4,E3,E1,F |           | 4       | 0.1%    |
| E2,E5,E4,E3,E6,F |           | 2       | 0.0%    |
| E2,E5,E4,E6,E1,F |           | 2       | 0.0%    |
| E2,E5,E4,E6,E3,F |           | 1       | 0.0%    |
| E2,E5,E6,E1,E4,F |           | 4       | 0.1%    |

| # r7randomizedblockorder: randomizedBlockOrder |           |         |         |
|------------------------------------------------|-----------|---------|---------|
| Verdi                                          | Merkelapp | Enheter | Prosent |
| E2,E5,E6,E3,E1,F                               |           | 2       | 0.0%    |
| E2,E5,E6,E3,E4,F                               |           | 1       | 0.0%    |
| E2,E5,E6,E4,E1,F                               |           | 3       | 0.1%    |
| E2,E5,E6,E4,E3,F                               |           | 1       | 0.0%    |
| E2,E6,E1,E3,E4,F                               |           | 4       | 0.1%    |
| E2,E6,E1,E3,E5,F                               |           | 2       | 0.0%    |
| E2,E6,E1,E4,E3,F                               |           | 1       | 0.0%    |
| E2,E6,E1,E5,E3,F                               |           | 4       | 0.1%    |
| E2,E6,E1,E5,E4,F                               |           | 3       | 0.1%    |
| E2,E6,E3,E1,E5,F                               |           | 2       | 0.0%    |
| E2,E6,E3,E4,E5,F                               |           | 3       | 0.1%    |
| E2,E6,E3,E5,E1,F                               |           | 4       | 0.1%    |
| E2,E6,E3,E5,E4,F                               |           | 1       | 0.0%    |
| E2,E6,E4,E1,E5,F                               |           | 2       | 0.0%    |
| E2,E6,E4,E5,E3,F                               |           | 2       | 0.0%    |
| E2,E6,E5,E1,E3,F                               |           | 1       | 0.0%    |
| E2,E6,E5,E1,E4,F                               |           | 2       | 0.0%    |
| E2,E6,E5,E3,E1,F                               |           | 1       | 0.0%    |
| E2,E6,E5,E3,E4,F                               |           | 1       | 0.0%    |
| E2,E6,E5,E4,E1,F                               |           | 2       | 0.0%    |
| E2,E6,E5,E4,E3,F                               |           | 1       | 0.0%    |
| E3,E1,E2,E4,E5,F                               |           | 3       | 0.1%    |
| E3,E1,E2,E4,E6,F                               |           | 1       | 0.0%    |
| E3,E1,E2,E5,E4,F                               |           | 5       | 0.1%    |
| E3,E1,E2,E5,E6,F                               |           | 3       | 0.1%    |
| E3,E1,E2,E6,E4,F                               |           | 1       | 0.0%    |
| E3,E1,E2,E6,E5,F                               |           | 4       | 0.1%    |
| E3,E1,E4,E2,E5,F                               |           | 1       | 0.0%    |
| E3,E1,E4,E2,E6,F                               |           | 1       | 0.0%    |
| E3,E1,E4,E5,E2,F                               |           | 2       | 0.0%    |
| E3,E1,E4,E5,E6,F                               |           | 1       | 0.0%    |
| E3,E1,E4,E6,E2,F                               |           | 2       | 0.0%    |
| E3,E1,E5,E2,E6,F                               |           | 3       | 0.1%    |
| E3,E1,E5,E4,E6,F                               |           | 3       | 0.1%    |
| E3,E1,E6,E2,E4,F                               |           | 1       | 0.0%    |
| E3,E1,E6,E2,E5,F                               |           | 2       | 0.0%    |
| E3,E1,E6,E4,E2,F                               |           | 2       | 0.0%    |
| E3,E1,E6,E4,E5,F                               |           | 1       | 0.0%    |
| E3,E2,E1,E4,E6,F                               |           | 2       | 0.0%    |
| E3,E2,E1,E5,E4,F                               |           | 1       | 0.0%    |
| E3,E2,E1,E5,E6,F                               |           | 1       | 0.0%    |
| E3,E2,E1,E6,E4,F                               |           | 1       | 0.0%    |
| E3,E2,E1,E6,E5,F                               |           | 2       | 0.0%    |
| E3,E2,E4,E1,E5,F                               |           | 1       | 0.0%    |
| E3,E2,E4,E1,E6,F                               |           | 4       | 0.1%    |

| # r7randomizedblockorder: randomizedBlockOrder |           |         |         |
|------------------------------------------------|-----------|---------|---------|
| Verdi                                          | Merkelapp | Enheter | Prosent |
| E3,E2,E4,E5,E6,F                               |           | 2       | 0.0%    |
| E3,E2,E4,E6,E1,F                               |           | 2       | 0.0%    |
| E3,E2,E4,E6,E5,F                               |           | 1       | 0.0%    |
| E3,E2,E5,E1,E4,F                               |           | 2       | 0.0%    |
| E3,E2,E5,E1,E6,F                               |           | 4       | 0.1%    |
| E3,E2,E5,E4,E1,F                               |           | 1       | 0.0%    |
| E3,E2,E5,E6,E4,F                               |           | 1       | 0.0%    |
| E3,E2,E6,E1,E4,F                               |           | 2       | 0.0%    |
| E3,E2,E6,E1,E5,F                               |           | 1       | 0.0%    |
| E3,E2,E6,E4,E1,F                               |           | 5       | 0.1%    |
| E3,E2,E6,E4,E5,F                               |           | 1       | 0.0%    |
| E3,E2,E6,E5,E1,F                               |           | 1       | 0.0%    |
| E3,E2,E6,E5,E4,F                               |           | 3       | 0.1%    |
| E3,E4,E1,E2,E5,F                               |           | 3       | 0.1%    |
| E3,E4,E1,E5,E6,F                               |           | 3       | 0.1%    |
| E3,E4,E1,E6,E2,F                               |           | 3       | 0.1%    |
| E3,E4,E2,E5,E1,F                               |           | 1       | 0.0%    |
| E3,E4,E2,E6,E5,F                               |           | 1       | 0.0%    |
| E3,E4,E5,E1,E2,F                               |           | 2       | 0.0%    |
| E3,E4,E5,E1,E6,F                               |           | 4       | 0.1%    |
| E3,E4,E5,E2,E1,F                               |           | 1       | 0.0%    |
| E3,E4,E5,E2,E6,F                               |           | 2       | 0.0%    |
| E3,E4,E5,E6,E1,F                               |           | 1       | 0.0%    |
| E3,E4,E6,E1,E2,F                               |           | 2       | 0.0%    |
| E3,E4,E6,E1,E5,F                               |           | 3       | 0.1%    |
| E3,E4,E6,E5,E1,F                               |           | 2       | 0.0%    |
| E3,E5,E1,E2,E4,F                               |           | 3       | 0.1%    |
| E3,E5,E1,E4,E2,F                               |           | 2       | 0.0%    |
| E3,E5,E1,E4,E6,F                               |           | 3       | 0.1%    |
| E3,E5,E1,E6,E2,F                               |           | 2       | 0.0%    |
| E3,E5,E1,E6,E4,F                               |           | 2       | 0.0%    |
| E3,E5,E2,E1,E4,F                               |           | 1       | 0.0%    |
| E3,E5,E2,E4,E1,F                               |           | 3       | 0.1%    |
| E3,E5,E2,E6,E1,F                               |           | 1       | 0.0%    |
| E3,E5,E2,E6,E4,F                               |           | 3       | 0.1%    |
| E3,E5,E4,E2,E1,F                               |           | 3       | 0.1%    |
| E3,E5,E4,E2,E6,F                               |           | 1       | 0.0%    |
| E3,E5,E4,E6,E1,F                               |           | 2       | 0.0%    |
| E3,E5,E4,E6,E2,F                               |           | 3       | 0.1%    |
| E3,E5,E6,E1,E2,F                               |           | 1       | 0.0%    |
| E3,E5,E6,E1,E4,F                               |           | 2       | 0.0%    |
| E3,E5,E6,E2,E1,F                               |           | 2       | 0.0%    |
| E3,E5,E6,E2,E4,F                               |           | 3       | 0.1%    |
| E3,E5,E6,E4,E1,F                               |           | 3       | 0.1%    |
| E3,E5,E6,E4,E2,F                               |           | 2       | 0.0%    |

| # r7randomizedblockorder: randomizedBlockOrder |           |         |         |
|------------------------------------------------|-----------|---------|---------|
| Verdi                                          | Merkelapp | Enheter | Prosent |
| E3,E6,E1,E2,E4,F                               |           | 4       | 0.1%    |
| E3,E6,E1,E4,E2,F                               |           | 1       | 0.0%    |
| E3,E6,E1,E4,E5,F                               |           | 2       | 0.0%    |
| E3,E6,E1,E5,E2,F                               |           | 1       | 0.0%    |
| E3,E6,E1,E5,E4,F                               |           | 1       | 0.0%    |
| E3,E6,E2,E1,E5,F                               |           | 2       | 0.0%    |
| E3,E6,E2,E4,E1,F                               |           | 3       | 0.1%    |
| E3,E6,E2,E5,E1,F                               |           | 1       | 0.0%    |
| E3,E6,E2,E5,E4,F                               |           | 2       | 0.0%    |
| E3,E6,E4,E1,E2,F                               |           | 1       | 0.0%    |
| E3,E6,E4,E1,E5,F                               |           | 3       | 0.1%    |
| E3,E6,E4,E2,E1,F                               |           | 1       | 0.0%    |
| E3,E6,E4,E2,E5,F                               |           | 2       | 0.0%    |
| E3,E6,E4,E5,E1,F                               |           | 1       | 0.0%    |
| E3,E6,E4,E5,E2,F                               |           | 1       | 0.0%    |
| E3,E6,E5,E1,E2,F                               |           | 2       | 0.0%    |
| E3,E6,E5,E1,E4,F                               |           | 2       | 0.0%    |
| E3,E6,E5,E2,E1,F                               |           | 1       | 0.0%    |
| E3,E6,E5,E4,E1,F                               |           | 4       | 0.1%    |
| E3,E6,E5,E4,E2,F                               |           | 1       | 0.0%    |
| E4,E1,E2,E3,E5,F                               |           | 1       | 0.0%    |
| E4,E1,E2,E3,E6,F                               |           | 3       | 0.1%    |
| E4,E1,E2,E5,E3,F                               |           | 1       | 0.0%    |
| E4,E1,E2,E5,E6,F                               |           | 2       | 0.0%    |
| E4,E1,E2,E6,E3,F                               |           | 1       | 0.0%    |
| E4,E1,E2,E6,E5,F                               |           | 3       | 0.1%    |
| E4,E1,E3,E2,E5,F                               |           | 1       | 0.0%    |
| E4,E1,E3,E2,E6,F                               |           | 7       | 0.1%    |
| E4,E1,E3,E5,E2,F                               |           | 1       | 0.0%    |
| E4,E1,E3,E6,E5,F                               |           | 1       | 0.0%    |
| E4,E1,E5,E2,E3,F                               |           | 1       | 0.0%    |
| E4,E1,E5,E2,E6,F                               |           | 4       | 0.1%    |
| E4,E1,E5,E3,E2,F                               |           | 1       | 0.0%    |
| E4,E1,E5,E6,E2,F                               |           | 1       | 0.0%    |
| E4,E1,E6,E2,E3,F                               |           | 1       | 0.0%    |
| E4,E1,E6,E2,E5,F                               |           | 2       | 0.0%    |
| E4,E1,E6,E3,E5,F                               |           | 3       | 0.1%    |
| E4,E1,E6,E5,E2,F                               |           | 2       | 0.0%    |
| E4,E2,E1,E3,E5,F                               |           | 2       | 0.0%    |
| E4,E2,E1,E3,E6,F                               |           | 2       | 0.0%    |
| E4,E2,E1,E5,E3,F                               |           | 4       | 0.1%    |
| E4,E2,E1,E6,E3,F                               |           | 3       | 0.1%    |
| E4,E2,E3,E1,E6,F                               |           | 4       | 0.1%    |
| E4,E2,E3,E5,E1,F                               |           | 4       | 0.1%    |
| E4,E2,E3,E5,E6,F                               |           | 1       | 0.0%    |

# # r7randomizedblockorder: randomizedBlockOrder

| Verdi            | Merkelapp | Enheter | Prosent |
|------------------|-----------|---------|---------|
| E4,E2,E3,E6,E1,F |           | 3       | 0.1%    |
| E4,E2,E3,E6,E5,F |           | 2       | 0.0%    |
| E4,E2,E5,E1,E6,F |           | 1       | 0.0%    |
| E4,E2,E5,E3,E1,F |           | 1       | 0.0%    |
| E4,E2,E5,E3,E6,F |           | 1       | 0.0%    |
| E4,E2,E5,E6,E3,F |           | 3       | 0.1%    |
| E4,E2,E6,E1,E3,F |           | 1       | 0.0%    |
| E4,E2,E6,E1,E5,F |           | 3       | 0.1%    |
| E4,E2,E6,E3,E5,F |           | 1       | 0.0%    |
| E4,E2,E6,E5,E1,F |           | 2       | 0.0%    |
| E4,E2,E6,E5,E3,F |           | 1       | 0.0%    |
| E4,E3,E1,E2,E6,F |           | 1       | 0.0%    |
| E4,E3,E1,E5,E2,F |           | 2       | 0.0%    |
| E4,E3,E1,E6,E2,F |           | 2       | 0.0%    |
| E4,E3,E1,E6,E5,F |           | 3       | 0.1%    |
| E4,E3,E2,E1,E5,F |           | 4       | 0.1%    |
| E4,E3,E2,E5,E1,F |           | 4       | 0.1%    |
| E4,E3,E2,E6,E1,F |           | 1       | 0.0%    |
| E4,E3,E5,E1,E2,F |           | 4       | 0.1%    |
| E4,E3,E5,E1,E6,F |           | 1       | 0.0%    |
| E4,E3,E5,E2,E1,F |           | 1       | 0.0%    |
| E4,E3,E5,E2,E6,F |           | 2       | 0.0%    |
| E4,E3,E5,E6,E1,F |           | 1       | 0.0%    |
| E4,E3,E5,E6,E2,F |           | 1       | 0.0%    |
| E4,E3,E6,E1,E2,F |           | 2       | 0.0%    |
| E4,E3,E6,E2,E1,F |           | 1       | 0.0%    |
| E4,E3,E6,E2,E5,F |           | 1       | 0.0%    |
| E4,E3,E6,E5,E1,F |           | 1       | 0.0%    |
| E4,E3,E6,E5,E2,F |           | 2       | 0.0%    |
| E4,E5,E1,E2,E6,F |           | 2       | 0.0%    |
| E4,E5,E1,E3,E2,F |           | 1       | 0.0%    |
| E4,E5,E1,E3,E6,F |           | 2       | 0.0%    |
| E4,E5,E1,E6,E3,F |           | 2       | 0.0%    |
| E4,E5,E2,E1,E3,F |           | 2       | 0.0%    |
| E4,E5,E2,E1,E6,F |           | 3       | 0.1%    |
| E4,E5,E2,E3,E1,F |           | 4       | 0.1%    |
| E4,E5,E2,E3,E6,F |           | 2       | 0.0%    |
| E4,E5,E2,E6,E1,F |           | 1       | 0.0%    |
| E4,E5,E2,E6,E3,F |           | 2       | 0.0%    |
| E4,E5,E3,E1,E2,F |           | 2       | 0.0%    |
| E4,E5,E3,E1,E6,F |           | 3       | 0.1%    |
| E4,E5,E3,E2,E1,F |           | 3       | 0.1%    |
| E4,E5,E3,E2,E6,F |           | 2       | 0.0%    |
| E4,E5,E3,E6,E1,F |           | 1       | 0.0%    |
| E4,E5,E3,E6,E2,F |           | 2       | 0.0%    |

| # r7randomizedblockorder: randomizedBlockOrder |           |         |         |
|------------------------------------------------|-----------|---------|---------|
| Verdi                                          | Merkelapp | Enheter | Prosent |
| E4,E5,E6,E1,E2,F                               |           | 2       | 0.0%    |
| E4,E5,E6,E1,E3,F                               |           | 2       | 0.0%    |
| E4,E5,E6,E2,E3,F                               |           | 3       | 0.1%    |
| E4,E5,E6,E3,E1,F                               |           | 1       | 0.0%    |
| E4,E5,E6,E3,E2,F                               |           | 1       | 0.0%    |
| E4,E6,E1,E2,E5,F                               |           | 2       | 0.0%    |
| E4,E6,E1,E5,E3,F                               |           | 1       | 0.0%    |
| E4,E6,E2,E1,E3,F                               |           | 1       | 0.0%    |
| E4,E6,E2,E1,E5,F                               |           | 1       | 0.0%    |
| E4,E6,E2,E3,E1,F                               |           | 2       | 0.0%    |
| E4,E6,E2,E5,E1,F                               |           | 3       | 0.1%    |
| E4,E6,E2,E5,E3,F                               |           | 1       | 0.0%    |
| E4,E6,E3,E1,E2,F                               |           | 1       | 0.0%    |
| E4,E6,E3,E1,E5,F                               |           | 1       | 0.0%    |
| E4,E6,E3,E2,E1,F                               |           | 6       | 0.1%    |
| E4,E6,E3,E2,E5,F                               |           | 4       | 0.1%    |
| E4,E6,E3,E5,E1,F                               |           | 1       | 0.0%    |
| E4,E6,E3,E5,E2,F                               |           | 2       | 0.0%    |
| E4,E6,E5,E1,E2,F                               |           | 3       | 0.1%    |
| E4,E6,E5,E1,E3,F                               |           | 2       | 0.0%    |
| E4,E6,E5,E2,E1,F                               |           | 2       | 0.0%    |
| E4,E6,E5,E2,E3,F                               |           | 1       | 0.0%    |
| E4,E6,E5,E3,E1,F                               |           | 2       | 0.0%    |
| E4,E6,E5,E3,E2,F                               |           | 4       | 0.1%    |
| E5,E1,E2,E3,E4,F                               |           | 4       | 0.1%    |
| E5,E1,E2,E3,E6,F                               |           | 1       | 0.0%    |
| E5,E1,E2,E4,E3,F                               |           | 1       | 0.0%    |
| E5,E1,E2,E4,E6,F                               |           | 2       | 0.0%    |
| E5,E1,E2,E6,E3,F                               |           | 1       | 0.0%    |
| E5,E1,E2,E6,E4,F                               |           | 2       | 0.0%    |
| E5,E1,E3,E2,E6,F                               |           | 5       | 0.1%    |
| E5,E1,E3,E4,E6,F                               |           | 2       | 0.0%    |
| E5,E1,E3,E6,E2,F                               |           | 4       | 0.1%    |
| E5,E1,E3,E6,E4,F                               |           | 1       | 0.0%    |
| E5,E1,E4,E2,E3,F                               |           | 3       | 0.1%    |
| E5,E1,E4,E2,E6,F                               |           | 3       | 0.1%    |
| E5,E1,E4,E3,E2,F                               |           | 1       | 0.0%    |
| E5,E1,E4,E3,E6,F                               |           | 2       | 0.0%    |
| E5,E1,E4,E6,E2,F                               |           | 3       | 0.1%    |
| E5,E1,E4,E6,E3,F                               |           | 1       | 0.0%    |
| E5,E1,E6,E2,E3,F                               |           | 1       | 0.0%    |
| E5,E1,E6,E2,E4,F                               |           | 2       | 0.0%    |
| E5,E1,E6,E3,E2,F                               |           | 2       | 0.0%    |
| E5,E1,E6,E3,E4,F                               |           | 2       | 0.0%    |
| E5,E1,E6,E4,E2,F                               |           | 1       | 0.0%    |

| # r7randomizedblockorder: randomizedBlockOrder |           |         |         |
|------------------------------------------------|-----------|---------|---------|
| Verdi                                          | Merkelapp | Enheter | Prosent |
| E5,E2,E1,E3,E4,F                               |           | 1       | 0.0%    |
| E5,E2,E1,E3,E6,F                               |           | 3       | 0.1%    |
| E5,E2,E1,E4,E6,F                               |           | 1       | 0.0%    |
| E5,E2,E1,E6,E3,F                               |           | 3       | 0.1%    |
| E5,E2,E1,E6,E4,F                               |           | 2       | 0.0%    |
| E5,E2,E3,E1,E6,F                               |           | 1       | 0.0%    |
| E5,E2,E3,E4,E1,F                               |           | 2       | 0.0%    |
| E5,E2,E3,E4,E6,F                               |           | 3       | 0.1%    |
| E5,E2,E3,E6,E4,F                               |           | 3       | 0.1%    |
| E5,E2,E4,E3,E6,F                               |           | 2       | 0.0%    |
| E5,E2,E4,E6,E3,F                               |           | 1       | 0.0%    |
| E5,E2,E6,E1,E3,F                               |           | 2       | 0.0%    |
| E5,E2,E6,E1,E4,F                               |           | 4       | 0.1%    |
| E5,E2,E6,E3,E1,F                               |           | 2       | 0.0%    |
| E5,E2,E6,E3,E4,F                               |           | 2       | 0.0%    |
| E5,E2,E6,E4,E1,F                               |           | 1       | 0.0%    |
| E5,E3,E1,E2,E4,F                               |           | 1       | 0.0%    |
| E5,E3,E1,E2,E6,F                               |           | 1       | 0.0%    |
| E5,E3,E1,E4,E2,F                               |           | 2       | 0.0%    |
| E5,E3,E1,E4,E6,F                               |           | 1       | 0.0%    |
| E5,E3,E1,E6,E2,F                               |           | 4       | 0.1%    |
| E5,E3,E1,E6,E4,F                               |           | 1       | 0.0%    |
| E5,E3,E2,E1,E4,F                               |           | 3       | 0.1%    |
| E5,E3,E2,E4,E1,F                               |           | 6       | 0.1%    |
| E5,E3,E2,E6,E1,F                               |           | 1       | 0.0%    |
| E5,E3,E2,E6,E4,F                               |           | 3       | 0.1%    |
| E5,E3,E4,E1,E2,F                               |           | 1       | 0.0%    |
| E5,E3,E4,E1,E6,F                               |           | 1       | 0.0%    |
| E5,E3,E4,E2,E1,F                               |           | 2       | 0.0%    |
| E5,E3,E4,E2,E6,F                               |           | 1       | 0.0%    |
| E5,E3,E4,E6,E2,F                               |           | 2       | 0.0%    |
| E5,E3,E6,E1,E2,F                               |           | 2       | 0.0%    |
| E5,E3,E6,E1,E4,F                               |           | 1       | 0.0%    |
| E5,E3,E6,E2,E1,F                               |           | 5       | 0.1%    |
| E5,E3,E6,E2,E4,F                               |           | 2       | 0.0%    |
| E5,E3,E6,E4,E2,F                               |           | 3       | 0.1%    |
| E5,E4,E1,E2,E3,F                               |           | 1       | 0.0%    |
| E5,E4,E1,E2,E6,F                               |           | 1       | 0.0%    |
| E5,E4,E1,E3,E2,F                               |           | 2       | 0.0%    |
| E5,E4,E1,E6,E2,F                               |           | 4       | 0.1%    |
| E5,E4,E2,E1,E3,F                               |           | 3       | 0.1%    |
| E5,E4,E2,E1,E6,F                               |           | 3       | 0.1%    |
| E5,E4,E2,E3,E6,F                               |           | 2       | 0.0%    |
| E5,E4,E2,E6,E3,F                               |           | 4       | 0.1%    |
| E5,E4,E3,E1,E2,F                               |           | 1       | 0.0%    |

| # r7randomizedblockorder: randomizedBlockOrder |           |         |         |
|------------------------------------------------|-----------|---------|---------|
| Verdi                                          | Merkelapp | Enheter | Prosent |
| E5,E4,E3,E1,E6,F                               |           | 2       | 0.0%    |
| E5,E4,E3,E2,E1,F                               |           | 1       | 0.0%    |
| E5,E4,E3,E2,E6,F                               |           | 1       | 0.0%    |
| E5,E4,E3,E6,E1,F                               |           | 1       | 0.0%    |
| E5,E4,E3,E6,E2,F                               |           | 1       | 0.0%    |
| E5,E4,E6,E1,E2,F                               |           | 1       | 0.0%    |
| E5,E4,E6,E1,E3,F                               |           | 1       | 0.0%    |
| E5,E4,E6,E2,E1,F                               |           | 2       | 0.0%    |
| E5,E4,E6,E2,E3,F                               |           | 1       | 0.0%    |
| E5,E4,E6,E3,E1,F                               |           | 1       | 0.0%    |
| E5,E4,E6,E3,E2,F                               |           | 1       | 0.0%    |
| E5,E6,E1,E2,E3,F                               |           | 2       | 0.0%    |
| E5,E6,E1,E2,E4,F                               |           | 1       | 0.0%    |
| E5,E6,E1,E3,E2,F                               |           | 2       | 0.0%    |
| E5,E6,E1,E4,E2,F                               |           | 2       | 0.0%    |
| E5,E6,E1,E4,E3,F                               |           | 2       | 0.0%    |
| E5,E6,E2,E1,E3,F                               |           | 1       | 0.0%    |
| E5,E6,E2,E3,E4,F                               |           | 1       | 0.0%    |
| E5,E6,E2,E4,E1,F                               |           | 2       | 0.0%    |
| E5,E6,E2,E4,E3,F                               |           | 1       | 0.0%    |
| E5,E6,E3,E1,E2,F                               |           | 1       | 0.0%    |
| E5,E6,E3,E1,E4,F                               |           | 2       | 0.0%    |
| E5,E6,E3,E2,E1,F                               |           | 3       | 0.1%    |
| E5,E6,E3,E2,E4,F                               |           | 2       | 0.0%    |
| E5,E6,E3,E4,E1,F                               |           | 1       | 0.0%    |
| E5,E6,E3,E4,E2,F                               |           | 4       | 0.1%    |
| E5,E6,E4,E1,E3,F                               |           | 3       | 0.1%    |
| E5,E6,E4,E2,E1,F                               |           | 2       | 0.0%    |
| E5,E6,E4,E2,E3,F                               |           | 2       | 0.0%    |
| E5,E6,E4,E3,E1,F                               |           | 1       | 0.0%    |
| E5,E6,E4,E3,E2,F                               |           | 1       | 0.0%    |
| E6,E1,E2,E3,E4,F                               |           | 2       | 0.0%    |
| E6,E1,E2,E4,E3,F                               |           | 4       | 0.1%    |
| E6,E1,E2,E4,E5,F                               |           | 3       | 0.1%    |
| E6,E1,E2,E5,E3,F                               |           | 1       | 0.0%    |
| E6,E1,E2,E5,E4,F                               |           | 3       | 0.1%    |
| E6,E1,E3,E2,E4,F                               |           | 2       | 0.0%    |
| E6,E1,E3,E2,E5,F                               |           | 1       | 0.0%    |
| E6,E1,E3,E4,E2,F                               |           | 1       | 0.0%    |
| E6,E1,E3,E4,E5,F                               |           | 2       | 0.0%    |
| E6,E1,E3,E5,E2,F                               |           | 2       | 0.0%    |
| E6,E1,E3,E5,E4,F                               |           | 3       | 0.1%    |
| E6,E1,E4,E2,E5,F                               |           | 2       | 0.0%    |
| E6,E1,E4,E3,E2,F                               |           | 2       | 0.0%    |
| E6,E1,E4,E3,E5,F                               |           | 2       | 0.0%    |



| # r7randomizedblockorder: randomizedBlockOrder |           |         |         |
|------------------------------------------------|-----------|---------|---------|
| Verdi                                          | Merkelapp | Enheter | Prosent |
| E6,E1,E4,E5,E2,F                               |           | 1       | 0.0%    |
| E6,E1,E4,E5,E3,F                               |           | 2       | 0.0%    |
| E6,E1,E5,E2,E3,F                               |           | 1       | 0.0%    |
| E6,E1,E5,E2,E4,F                               |           | 1       | 0.0%    |
| E6,E1,E5,E3,E2,F                               |           | 1       | 0.0%    |
| E6,E1,E5,E3,E4,F                               |           | 2       | 0.0%    |
| E6,E1,E5,E4,E2,F                               |           | 1       | 0.0%    |
| E6,E1,E5,E4,E3,F                               |           | 1       | 0.0%    |
| E6,E2,E1,E3,E4,F                               |           | 2       | 0.0%    |
| E6,E2,E1,E3,E5,F                               |           | 2       | 0.0%    |
| E6,E2,E1,E4,E3,F                               |           | 1       | 0.0%    |
| E6,E2,E1,E4,E5,F                               |           | 1       | 0.0%    |
| E6,E2,E1,E5,E3,F                               |           | 2       | 0.0%    |
| E6,E2,E3,E1,E4,F                               |           | 2       | 0.0%    |
| E6,E2,E3,E1,E5,F                               |           | 3       | 0.1%    |
| E6,E2,E3,E4,E1,F                               |           | 5       | 0.1%    |
| E6,E2,E3,E4,E5,F                               |           | 2       | 0.0%    |
| E6,E2,E3,E5,E1,F                               |           | 2       | 0.0%    |
| E6,E2,E3,E5,E4,F                               |           | 3       | 0.1%    |
| E6,E2,E4,E1,E3,F                               |           | 2       | 0.0%    |
| E6,E2,E4,E3,E1,F                               |           | 1       | 0.0%    |
| E6,E2,E4,E3,E5,F                               |           | 1       | 0.0%    |
| E6,E2,E4,E5,E1,F                               |           | 2       | 0.0%    |
| E6,E2,E5,E1,E3,F                               |           | 2       | 0.0%    |
| E6,E2,E5,E1,E4,F                               |           | 1       | 0.0%    |
| E6,E2,E5,E3,E1,F                               |           | 4       | 0.1%    |
| E6,E2,E5,E3,E4,F                               |           | 1       | 0.0%    |
| E6,E2,E5,E4,E1,F                               |           | 3       | 0.1%    |
| E6,E2,E5,E4,E3,F                               |           | 2       | 0.0%    |
| E6,E3,E1,E2,E5,F                               |           | 1       | 0.0%    |
| E6,E3,E1,E4,E2,F                               |           | 2       | 0.0%    |
| E6,E3,E1,E4,E5,F                               |           | 5       | 0.1%    |
| E6,E3,E1,E5,E4,F                               |           | 1       | 0.0%    |
| E6,E3,E2,E1,E4,F                               |           | 2       | 0.0%    |
| E6,E3,E2,E1,E5,F                               |           | 1       | 0.0%    |
| E6,E3,E2,E4,E1,F                               |           | 3       | 0.1%    |
| E6,E3,E2,E5,E1,F                               |           | 2       | 0.0%    |
| E6,E3,E2,E5,E4,F                               |           | 1       | 0.0%    |
| E6,E3,E4,E1,E2,F                               |           | 1       | 0.0%    |
| E6,E3,E4,E2,E1,F                               |           | 2       | 0.0%    |
| E6,E3,E4,E5,E1,F                               |           | 2       | 0.0%    |
| E6,E3,E5,E1,E2,F                               |           | 2       | 0.0%    |
| E6,E3,E5,E2,E1,F                               |           | 2       | 0.0%    |
| E6,E3,E5,E2,E4,F                               |           | 1       | 0.0%    |
| E6,E3,E5,E4,E2,F                               |           | 2       | 0.0%    |

| # r7randomizedblockorder: randomizedBlockOrder                                                                                       |                                                                |         |                   |
|--------------------------------------------------------------------------------------------------------------------------------------|----------------------------------------------------------------|---------|-------------------|
| Verdi                                                                                                                                | Merkelapp                                                      | Enheter | Prosent           |
| E6,E4,E1,E2,E3,F                                                                                                                     |                                                                | 2       | 0.0%              |
| E6,E4,E1,E2,E5,F                                                                                                                     |                                                                | 2       | 0.0%              |
| E6,E4,E1,E3,E2,F                                                                                                                     |                                                                | 3       | 0.1%              |
| E6,E4,E1,E3,E5,F                                                                                                                     |                                                                | 1       | 0.0%              |
| E6,E4,E1,E5,E3,F                                                                                                                     |                                                                | 1       | 0.0%              |
| E6,E4,E2,E1,E3,F                                                                                                                     |                                                                | 4       | 0.1%              |
| E6,E4,E2,E1,E5,F                                                                                                                     |                                                                | 3       | 0.1%              |
| E6,E4,E2,E3,E1,F                                                                                                                     |                                                                | 3       | 0.1%              |
| E6,E4,E2,E3,E5,F                                                                                                                     |                                                                | 2       | 0.0%              |
| E6,E4,E2,E5,E3,F                                                                                                                     |                                                                | 2       | 0.0%              |
| E6,E4,E3,E1,E2,F                                                                                                                     |                                                                | 1       | 0.0%              |
| E6,E4,E3,E1,E5,F                                                                                                                     |                                                                | 2       | 0.0%              |
| E6,E4,E3,E2,E5,F                                                                                                                     |                                                                | 2       | 0.0%              |
| E6,E4,E3,E5,E1,F                                                                                                                     |                                                                | 2       | 0.0%              |
| E6,E4,E3,E5,E2,F                                                                                                                     |                                                                | 2       | 0.0%              |
| E6,E4,E5,E2,E1,F                                                                                                                     |                                                                | 2       | 0.0%              |
| E6,E4,E5,E2,E3,F                                                                                                                     |                                                                | 1       | 0.0%              |
| E6,E4,E5,E3,E2,F                                                                                                                     |                                                                | 1       | 0.0%              |
| E6,E5,E1,E2,E3,F                                                                                                                     |                                                                | 2       | 0.0%              |
| E6,E5,E1,E2,E4,F                                                                                                                     |                                                                | 3       | 0.1%              |
| E6,E5,E1,E3,E2,F                                                                                                                     |                                                                | 2       | 0.0%              |
| E6,E5,E1,E3,E4,F                                                                                                                     |                                                                | 3       | 0.1%              |
| E6,E5,E1,E4,E2,F                                                                                                                     |                                                                | 3       | 0.1%              |
| E6,E5,E1,E4,E3,F                                                                                                                     |                                                                | 2       | 0.0%              |
| E6,E5,E2,E1,E4,F                                                                                                                     |                                                                | 1       | 0.0%              |
| E6,E5,E2,E3,E4,F                                                                                                                     |                                                                | 2       | 0.0%              |
| E6,E5,E2,E4,E1,F                                                                                                                     |                                                                | 1       | 0.0%              |
| E6,E5,E2,E4,E3,F                                                                                                                     |                                                                | 3       | 0.1%              |
| E6,E5,E3,E1,E2,F                                                                                                                     |                                                                | 1       | 0.0%              |
| E6,E5,E3,E1,E4,F                                                                                                                     |                                                                | 1       | 0.0%              |
| E6,E5,E3,E2,E4,F                                                                                                                     |                                                                | 2       | 0.0%              |
| E6,E5,E3,E4,E2,F                                                                                                                     |                                                                | 1       | 0.0%              |
| E6,E5,E4,E1,E2,F                                                                                                                     |                                                                | 1       | 0.0%              |
| E6,E5,E4,E2,E1,F                                                                                                                     |                                                                | 1       | 0.0%              |
| Advarsel: disse tallene indikerer antall enheter (cases) i datafilen. De kan ikke tolkes som oppsummert statistikk for populasjonen. |                                                                |         |                   |
| # r7ocreasm_mobile2: R7OCRECSM_mobile2                                                                                               |                                                                |         |                   |
| Informasjon                                                                                                                          | [Type= diskret] [Format=numeric] [Rekkevidde= 0-1] [Missing=*] |         |                   |
| Statistikk [NW/ W]                                                                                                                   | [Gyldige=1176 /-] [Ugyldig=3513 /-]                            |         |                   |
| Instruksjoner til intervjueren                                                                                                       | [Informasjon om hvilken enhet respondenten bruker.]            |         |                   |
| Verdi                                                                                                                                | Merkelapp                                                      | Enheter | Prosent           |
| 0                                                                                                                                    | Mobil - nei                                                    | 875     | <div></div> 74.4% |
| 1                                                                                                                                    | Mobil - ja                                                     | 301     | <div></div> 25.6% |
| Sysmiss                                                                                                                              |                                                                | 3513    |                   |
| Advarsel: disse tallene indikerer antall enheter (cases) i datafilen. De kan ikke tolkes som oppsummert statistikk for populasjonen. |                                                                |         |                   |

| # r7ocreasm3a1: Hvor viktig er god utdanning i avgjørelsen om noen får bosette seg i Norge? |                                                                                                                                                                                                                                                    |         |         |
|---------------------------------------------------------------------------------------------|----------------------------------------------------------------------------------------------------------------------------------------------------------------------------------------------------------------------------------------------------|---------|---------|
| Informasjon                                                                                 | [Type= diskret] [Format=numeric] [Rekkevidde= 0-50] [Missing=*]                                                                                                                                                                                    |         |         |
| Statistikk [NW/ W]                                                                          | [Gyldige=4689 /-] [Ugyldig=0 /-]                                                                                                                                                                                                                   |         |         |
| Tekst før spørsmål                                                                          | For å hjelpe oss med å forbedre spørsmålene våre i senere undersøkelser, vil vi til slutt be deg svare på noen spørsmål som ligner på de du har svart på tidligere. Ikke prøv å huske hva du har svart før, men tenk på dem som helt nye spørsmål. |         |         |
| Spørsmålstekst                                                                              | Hvor viktig synes du å ha en god utdanning bør være for å avgjøre om noen som er født, oppvokst og bor utenfor Norge skal få bosette seg her?                                                                                                      |         |         |
| Instruksjoner til intervjueren                                                              | [Spurt hvis u=2, ran20=1 og R7OCRECSM_mobile2=0. Versjon for PC -og nettbrettbrukere. Mobilbrukere blir spurt R7OCRECSM3A1_mobile.]<br><br>[Slider blir brukt for å avgi svar. Utgangsposisjonen er satt til verdien 25.]                          |         |         |
| Kommentarer                                                                                 | For å hjelpe oss med å forbedre spørsmålene våre i senere undersøkelser, vil vi til slutt be deg svare på noen sp                                                                                                                                  |         |         |
| Verdi                                                                                       | Merkelapp                                                                                                                                                                                                                                          | Enheter | Prosent |
| 0                                                                                           | Ikke i det hele tatt                                                                                                                                                                                                                               | 31      | 0.7%    |
| 1                                                                                           | 1                                                                                                                                                                                                                                                  | 9       | 0.2%    |
| 2                                                                                           | 2                                                                                                                                                                                                                                                  | 7       | 0.1%    |
| 3                                                                                           | 3                                                                                                                                                                                                                                                  | 6       | 0.1%    |
| 4                                                                                           | 4                                                                                                                                                                                                                                                  | 7       | 0.1%    |
| 5                                                                                           | 5                                                                                                                                                                                                                                                  | 8       | 0.2%    |
| 6                                                                                           | 6                                                                                                                                                                                                                                                  | 8       | 0.2%    |
| 7                                                                                           | 7                                                                                                                                                                                                                                                  | 5       | 0.1%    |
| 8                                                                                           | 8                                                                                                                                                                                                                                                  | 9       | 0.2%    |
| 9                                                                                           | 9                                                                                                                                                                                                                                                  | 5       | 0.1%    |
| 10                                                                                          | 10                                                                                                                                                                                                                                                 | 6       | 0.1%    |
| 11                                                                                          | 11                                                                                                                                                                                                                                                 | 8       | 0.2%    |
| 12                                                                                          | 12                                                                                                                                                                                                                                                 | 3       | 0.1%    |
| 13                                                                                          | 13                                                                                                                                                                                                                                                 | 9       | 0.2%    |
| 14                                                                                          | 14                                                                                                                                                                                                                                                 | 3       | 0.1%    |
| 15                                                                                          | 15                                                                                                                                                                                                                                                 | 3       | 0.1%    |
| 16                                                                                          | 16                                                                                                                                                                                                                                                 | 4       | 0.1%    |
| 17                                                                                          | 17                                                                                                                                                                                                                                                 | 0       |         |
| 18                                                                                          | 18                                                                                                                                                                                                                                                 | 3       | 0.1%    |
| 19                                                                                          | 19                                                                                                                                                                                                                                                 | 3       | 0.1%    |
| 20                                                                                          | 20                                                                                                                                                                                                                                                 | 2       | 0.0%    |
| 21                                                                                          | 21                                                                                                                                                                                                                                                 | 2       | 0.0%    |
| 22                                                                                          | 22                                                                                                                                                                                                                                                 | 2       | 0.0%    |
| 23                                                                                          | 23                                                                                                                                                                                                                                                 | 1       | 0.0%    |
| 24                                                                                          | 24                                                                                                                                                                                                                                                 | 5       | 0.1%    |
| 25                                                                                          | 25                                                                                                                                                                                                                                                 | 44      | 0.9%    |
| 26                                                                                          | 26                                                                                                                                                                                                                                                 | 2       | 0.0%    |
| 27                                                                                          | 27                                                                                                                                                                                                                                                 | 3       | 0.1%    |
| 28                                                                                          | 28                                                                                                                                                                                                                                                 | 5       | 0.1%    |
| 29                                                                                          | 29                                                                                                                                                                                                                                                 | 5       | 0.1%    |
| 30                                                                                          | 30                                                                                                                                                                                                                                                 | 7       | 0.1%    |
| 31                                                                                          | 31                                                                                                                                                                                                                                                 | 4       | 0.1%    |
| 32                                                                                          | 32                                                                                                                                                                                                                                                 | 5       | 0.1%    |
| 33                                                                                          | 33                                                                                                                                                                                                                                                 | 6       | 0.1%    |
| 34                                                                                          | 34                                                                                                                                                                                                                                                 | 5       | 0.1%    |

| # r7ocreasm3a1: Hvor viktig er god utdanning i avgjørelsen om noen får bosette seg i Norge?                                          |                                                                                                                                                                                                                                                    |         |         |
|--------------------------------------------------------------------------------------------------------------------------------------|----------------------------------------------------------------------------------------------------------------------------------------------------------------------------------------------------------------------------------------------------|---------|---------|
| Verdi                                                                                                                                | Merkelapp                                                                                                                                                                                                                                          | Enheter | Prosent |
| 35                                                                                                                                   | 35                                                                                                                                                                                                                                                 | 4       | 0.1%    |
| 36                                                                                                                                   | 36                                                                                                                                                                                                                                                 | 1       | 0.0%    |
| 37                                                                                                                                   | 37                                                                                                                                                                                                                                                 | 8       | 0.2%    |
| 38                                                                                                                                   | 38                                                                                                                                                                                                                                                 | 4       | 0.1%    |
| 39                                                                                                                                   | 39                                                                                                                                                                                                                                                 | 3       | 0.1%    |
| 40                                                                                                                                   | 40                                                                                                                                                                                                                                                 | 4       | 0.1%    |
| 41                                                                                                                                   | 41                                                                                                                                                                                                                                                 | 3       | 0.1%    |
| 42                                                                                                                                   | 42                                                                                                                                                                                                                                                 | 2       | 0.0%    |
| 43                                                                                                                                   | 43                                                                                                                                                                                                                                                 | 1       | 0.0%    |
| 44                                                                                                                                   | 44                                                                                                                                                                                                                                                 | 0       |         |
| 45                                                                                                                                   | 45                                                                                                                                                                                                                                                 | 1       | 0.0%    |
| 46                                                                                                                                   | 46                                                                                                                                                                                                                                                 | 2       | 0.0%    |
| 47                                                                                                                                   | 47                                                                                                                                                                                                                                                 | 0       |         |
| 48                                                                                                                                   | 48                                                                                                                                                                                                                                                 | 0       |         |
| 49                                                                                                                                   | 49                                                                                                                                                                                                                                                 | 4       | 0.1%    |
| 50                                                                                                                                   | Fullstendig                                                                                                                                                                                                                                        | 5       | 0.1%    |
| 97                                                                                                                                   | Ikke svart                                                                                                                                                                                                                                         | 0       |         |
| 98                                                                                                                                   | Ikke spurt                                                                                                                                                                                                                                         | 4412    | 94.1%   |
| Advarsel: disse tallene indikerer antall enheter (cases) i datafilen. De kan ikke tolkes som oppsummert statistikk for populasjonen. |                                                                                                                                                                                                                                                    |         |         |
| # r7ocreasm3a1_mobile: Hvor viktig er god utdanning i avgjørelsen om noen får bosette seg i Norge?                                   |                                                                                                                                                                                                                                                    |         |         |
| Informasjon                                                                                                                          | [Type= diskret] [Format=numeric] [Rekkevidde= 0-50] [Missing=*]                                                                                                                                                                                    |         |         |
| Statistikk [NW/ W]                                                                                                                   | [Gyldige=4689 /-] [Ugyldig=0 /-]                                                                                                                                                                                                                   |         |         |
| Tekst før spørsmål                                                                                                                   | For å hjelpe oss med å forbedre spørsmålene våre i senere undersøkelser, vil vi til slutt be deg svare på noen spørsmål som ligner på de du har svart på tidligere. Ikke prøv å huske hva du har svart før, men tenk på dem som helt nye spørsmål. |         |         |
| Spørsmålstekst                                                                                                                       | Hvor viktig synes du å ha en god utdanning bør være for å avgjøre om noen som er født, oppvokst og bor utenfor Norge skal få bosette seg her?                                                                                                      |         |         |
| Instruksjoner til intervjueren                                                                                                       | [Spurt hvis u=2, ran20=1 og R7OCRECSM_mobile2=1. Versjon for mobilbrukere på grunn av oppsett. PC- og nettbrettbrukere blir spurt R7OCRECSM3A1.]<br><br>[Slider blir brukt for å avgi svar. Utgangsposisjonen er satt til verdien 25.]             |         |         |
| Kommentarer                                                                                                                          | For å hjelpe oss med å forbedre spørsmålene våre i senere undersøkelser, vil vi til slutt be deg svare på noen sp                                                                                                                                  |         |         |
| Verdi                                                                                                                                | Merkelapp                                                                                                                                                                                                                                          | Enheter | Prosent |
| 0                                                                                                                                    | Ikke i det hele tatt                                                                                                                                                                                                                               | 5       | 0.1%    |
| 1                                                                                                                                    | 1                                                                                                                                                                                                                                                  | 1       | 0.0%    |
| 2                                                                                                                                    | 2                                                                                                                                                                                                                                                  | 1       | 0.0%    |
| 3                                                                                                                                    | 3                                                                                                                                                                                                                                                  | 3       | 0.1%    |
| 4                                                                                                                                    | 4                                                                                                                                                                                                                                                  | 1       | 0.0%    |
| 5                                                                                                                                    | 5                                                                                                                                                                                                                                                  | 2       | 0.0%    |
| 6                                                                                                                                    | 6                                                                                                                                                                                                                                                  | 3       | 0.1%    |
| 7                                                                                                                                    | 7                                                                                                                                                                                                                                                  | 4       | 0.1%    |
| 8                                                                                                                                    | 8                                                                                                                                                                                                                                                  | 1       | 0.0%    |
| 9                                                                                                                                    | 9                                                                                                                                                                                                                                                  | 0       |         |
| 10                                                                                                                                   | 10                                                                                                                                                                                                                                                 | 0       |         |
| 11                                                                                                                                   | 11                                                                                                                                                                                                                                                 | 2       | 0.0%    |
| 12                                                                                                                                   | 12                                                                                                                                                                                                                                                 | 4       | 0.1%    |

| # r7ocreasm3a1_mobile: Hvor viktig er god utdanning i avgjørelsen om noen får bosette seg i Norge?                                   |                                                                                                  |         |         |
|--------------------------------------------------------------------------------------------------------------------------------------|--------------------------------------------------------------------------------------------------|---------|---------|
| Verdi                                                                                                                                | Merkelapp                                                                                        | Enheter | Prosent |
| 13                                                                                                                                   | 13                                                                                               | 2       | 0.0%    |
| 14                                                                                                                                   | 14                                                                                               | 2       | 0.0%    |
| 15                                                                                                                                   | 15                                                                                               | 2       | 0.0%    |
| 16                                                                                                                                   | 16                                                                                               | 0       |         |
| 17                                                                                                                                   | 17                                                                                               | 0       |         |
| 18                                                                                                                                   | 18                                                                                               | 1       | 0.0%    |
| 19                                                                                                                                   | 19                                                                                               | 1       | 0.0%    |
| 20                                                                                                                                   | 20                                                                                               | 0       |         |
| 21                                                                                                                                   | 21                                                                                               | 0       |         |
| 22                                                                                                                                   | 22                                                                                               | 0       |         |
| 23                                                                                                                                   | 23                                                                                               | 1       | 0.0%    |
| 24                                                                                                                                   | 24                                                                                               | 0       |         |
| 25                                                                                                                                   | 25                                                                                               | 15      | 0.3%    |
| 26                                                                                                                                   | 26                                                                                               | 1       | 0.0%    |
| 27                                                                                                                                   | 27                                                                                               | 1       | 0.0%    |
| 28                                                                                                                                   | 28                                                                                               | 2       | 0.0%    |
| 29                                                                                                                                   | 29                                                                                               | 2       | 0.0%    |
| 30                                                                                                                                   | 30                                                                                               | 4       | 0.1%    |
| 31                                                                                                                                   | 31                                                                                               | 3       | 0.1%    |
| 32                                                                                                                                   | 32                                                                                               | 2       | 0.0%    |
| 33                                                                                                                                   | 33                                                                                               | 0       |         |
| 34                                                                                                                                   | 34                                                                                               | 1       | 0.0%    |
| 35                                                                                                                                   | 35                                                                                               | 0       |         |
| 36                                                                                                                                   | 36                                                                                               | 1       | 0.0%    |
| 37                                                                                                                                   | 37                                                                                               | 2       | 0.0%    |
| 38                                                                                                                                   | 38                                                                                               | 1       | 0.0%    |
| 39                                                                                                                                   | 39                                                                                               | 0       |         |
| 40                                                                                                                                   | 40                                                                                               | 2       | 0.0%    |
| 41                                                                                                                                   | 41                                                                                               | 1       | 0.0%    |
| 42                                                                                                                                   | 42                                                                                               | 1       | 0.0%    |
| 43                                                                                                                                   | 43                                                                                               | 1       | 0.0%    |
| 44                                                                                                                                   | 44                                                                                               | 0       |         |
| 45                                                                                                                                   | 45                                                                                               | 2       | 0.0%    |
| 46                                                                                                                                   | 46                                                                                               | 1       | 0.0%    |
| 47                                                                                                                                   | 47                                                                                               | 0       |         |
| 48                                                                                                                                   | 48                                                                                               | 1       | 0.0%    |
| 49                                                                                                                                   | 49                                                                                               | 1       | 0.0%    |
| 50                                                                                                                                   | Fullstendig                                                                                      | 5       | 0.1%    |
| 97                                                                                                                                   | Ikke svart                                                                                       | 0       |         |
| 98                                                                                                                                   | Ikke spurt                                                                                       | 4603    | 98.2%   |
| Advarsel: disse tallene indikerer antall enheter (cases) i datafilen. De kan ikke tolkes som oppsummert statistikk for populasjonen. |                                                                                                  |         |         |
| # r7ocreasm3a2: Hvor viktig er kristen bakgrunn i avgjørelsen om noen får bosette seg i Norge?                                       |                                                                                                  |         |         |
| Informasjon                                                                                                                          | [Type= diskret] [Format=numeric] [Rekkevidde= 0-50] [Missing=*]                                  |         |         |
| Statistikk [NW/ W]                                                                                                                   | [Gyldige=4689 /-] [Ugyldig=0 /-]                                                                 |         |         |
| Spørsmålstekst                                                                                                                       | Hvor viktig synes du en kristen bakgrunn bør være for å avgjøre om noen skal få bosette seg her? |         |         |

| # r7ocreasm3a2: Hvor viktig er kristen bakgrunn i avgjørelsen om noen får bosette seg i Norge? |                      |                                                                                                                                                                                                                           |         |
|------------------------------------------------------------------------------------------------|----------------------|---------------------------------------------------------------------------------------------------------------------------------------------------------------------------------------------------------------------------|---------|
| Instruksjoner til intervjueren                                                                 |                      | [Spurt hvis u=2, ran20=1 og R7OCRECSM_mobile2=0. Versjon for PC -og nettbrettbrukere. Mobilbrukere blir spurt R7OCRECSM3A2_mobile.]<br><br>[Slider blir brukt for å avgi svar. Utgangsposisjonen er satt til verdien 25.] |         |
| Kommentarer                                                                                    |                      | Hvor viktig synes du en kristen bakgrunn bør være for å avgjøre om noen skal få bosette seg her? ^f('R7OCRECSM_skal                                                                                                       |         |
| Verdi                                                                                          | Merkelapp            | Enheter                                                                                                                                                                                                                   | Prosent |
| 0                                                                                              | Ikke i det hele tatt | 95                                                                                                                                                                                                                        | 2.0%    |
| 1                                                                                              | 1                    | 8                                                                                                                                                                                                                         | 0.2%    |
| 2                                                                                              | 2                    | 12                                                                                                                                                                                                                        | 0.3%    |
| 3                                                                                              | 3                    | 10                                                                                                                                                                                                                        | 0.2%    |
| 4                                                                                              | 4                    | 7                                                                                                                                                                                                                         | 0.1%    |
| 5                                                                                              | 5                    | 7                                                                                                                                                                                                                         | 0.1%    |
| 6                                                                                              | 6                    | 5                                                                                                                                                                                                                         | 0.1%    |
| 7                                                                                              | 7                    | 7                                                                                                                                                                                                                         | 0.1%    |
| 8                                                                                              | 8                    | 2                                                                                                                                                                                                                         | 0.0%    |
| 9                                                                                              | 9                    | 3                                                                                                                                                                                                                         | 0.1%    |
| 10                                                                                             | 10                   | 11                                                                                                                                                                                                                        | 0.2%    |
| 11                                                                                             | 11                   | 5                                                                                                                                                                                                                         | 0.1%    |
| 12                                                                                             | 12                   | 8                                                                                                                                                                                                                         | 0.2%    |
| 13                                                                                             | 13                   | 4                                                                                                                                                                                                                         | 0.1%    |
| 14                                                                                             | 14                   | 2                                                                                                                                                                                                                         | 0.0%    |
| 15                                                                                             | 15                   | 4                                                                                                                                                                                                                         | 0.1%    |
| 16                                                                                             | 16                   | 4                                                                                                                                                                                                                         | 0.1%    |
| 17                                                                                             | 17                   | 3                                                                                                                                                                                                                         | 0.1%    |
| 18                                                                                             | 18                   | 3                                                                                                                                                                                                                         | 0.1%    |
| 19                                                                                             | 19                   | 3                                                                                                                                                                                                                         | 0.1%    |
| 20                                                                                             | 20                   | 3                                                                                                                                                                                                                         | 0.1%    |
| 21                                                                                             | 21                   | 6                                                                                                                                                                                                                         | 0.1%    |
| 22                                                                                             | 22                   | 3                                                                                                                                                                                                                         | 0.1%    |
| 23                                                                                             | 23                   | 0                                                                                                                                                                                                                         |         |
| 24                                                                                             | 24                   | 1                                                                                                                                                                                                                         | 0.0%    |
| 25                                                                                             | 25                   | 20                                                                                                                                                                                                                        | 0.4%    |
| 26                                                                                             | 26                   | 1                                                                                                                                                                                                                         | 0.0%    |
| 27                                                                                             | 27                   | 0                                                                                                                                                                                                                         |         |
| 28                                                                                             | 28                   | 3                                                                                                                                                                                                                         | 0.1%    |
| 29                                                                                             | 29                   | 0                                                                                                                                                                                                                         |         |
| 30                                                                                             | 30                   | 5                                                                                                                                                                                                                         | 0.1%    |
| 31                                                                                             | 31                   | 3                                                                                                                                                                                                                         | 0.1%    |
| 32                                                                                             | 32                   | 2                                                                                                                                                                                                                         | 0.0%    |
| 33                                                                                             | 33                   | 0                                                                                                                                                                                                                         |         |
| 34                                                                                             | 34                   | 2                                                                                                                                                                                                                         | 0.0%    |
| 35                                                                                             | 35                   | 2                                                                                                                                                                                                                         | 0.0%    |
| 36                                                                                             | 36                   | 2                                                                                                                                                                                                                         | 0.0%    |
| 37                                                                                             | 37                   | 3                                                                                                                                                                                                                         | 0.1%    |
| 38                                                                                             | 38                   | 4                                                                                                                                                                                                                         | 0.1%    |
| 39                                                                                             | 39                   | 4                                                                                                                                                                                                                         | 0.1%    |

| # r7ocreasm3a2: Hvor viktig er kristen bakgrunn i avgjørelsen om noen får bosette seg i Norge?                                       |                                                                                                                                                                                                                                        |         |         |
|--------------------------------------------------------------------------------------------------------------------------------------|----------------------------------------------------------------------------------------------------------------------------------------------------------------------------------------------------------------------------------------|---------|---------|
| Verdi                                                                                                                                | Merkelapp                                                                                                                                                                                                                              | Enheter | Prosent |
| 40                                                                                                                                   | 40                                                                                                                                                                                                                                     | 0       |         |
| 41                                                                                                                                   | 41                                                                                                                                                                                                                                     | 1       | 0.0%    |
| 42                                                                                                                                   | 42                                                                                                                                                                                                                                     | 2       | 0.0%    |
| 43                                                                                                                                   | 43                                                                                                                                                                                                                                     | 0       |         |
| 44                                                                                                                                   | 44                                                                                                                                                                                                                                     | 0       |         |
| 45                                                                                                                                   | 45                                                                                                                                                                                                                                     | 0       |         |
| 46                                                                                                                                   | 46                                                                                                                                                                                                                                     | 0       |         |
| 47                                                                                                                                   | 47                                                                                                                                                                                                                                     | 1       | 0.0%    |
| 48                                                                                                                                   | 48                                                                                                                                                                                                                                     | 3       | 0.1%    |
| 49                                                                                                                                   | 49                                                                                                                                                                                                                                     | 0       |         |
| 50                                                                                                                                   | Fullstendig                                                                                                                                                                                                                            | 3       | 0.1%    |
| 97                                                                                                                                   | Ikke svart                                                                                                                                                                                                                             | 0       |         |
| 98                                                                                                                                   | Ikke spurt                                                                                                                                                                                                                             | 4412    | 94.1%   |
| Advarsel: disse tallene indikerer antall enheter (cases) i datafilen. De kan ikke tolkes som oppsummert statistikk for populasjonen. |                                                                                                                                                                                                                                        |         |         |
| # r7ocreasm3a2_mobile: Hvor viktig er kristen bakgrunn i avgjørelsen om noen får bosette seg i Norge?                                |                                                                                                                                                                                                                                        |         |         |
| Informasjon                                                                                                                          | [Type= diskret] [Format=numeric] [Rekkevidde= 0-50] [Missing=*]                                                                                                                                                                        |         |         |
| Statistikk [NW/ W]                                                                                                                   | [Gyldige=4689 /-] [Ugyldig=0 /-]                                                                                                                                                                                                       |         |         |
| Spørsmålstekst                                                                                                                       | Hvor viktig synes du en kristen bakgrunn bør være for å avgjøre om noen skal få bosette seg her?                                                                                                                                       |         |         |
| Instruksjoner til intervjueren                                                                                                       | [Spurt hvis u=2, ran20=1 og R7OCRECSM_mobile2=1. Versjon for mobilbrukere på grunn av oppsett. PC- og nettbrettbrukere blir spurt R7OCRECSM3A2.]<br><br>[Slider blir brukt for å avgi svar. Utgangsposisjonen er satt til verdien 25.] |         |         |
| Kommentarer                                                                                                                          | Hvor viktig synes du en kristen bakgrunn bør være for å avgjøre om noen skal få bosette seg her?                                                                                                                                       |         |         |
| Verdi                                                                                                                                | Merkelapp                                                                                                                                                                                                                              | Enheter | Prosent |
| 0                                                                                                                                    | Ikke i det hele tatt                                                                                                                                                                                                                   | 36      | 0.8%    |
| 1                                                                                                                                    | 1                                                                                                                                                                                                                                      | 0       |         |
| 2                                                                                                                                    | 2                                                                                                                                                                                                                                      | 0       |         |
| 3                                                                                                                                    | 3                                                                                                                                                                                                                                      | 0       |         |
| 4                                                                                                                                    | 4                                                                                                                                                                                                                                      | 0       |         |
| 5                                                                                                                                    | 5                                                                                                                                                                                                                                      | 2       | 0.0%    |
| 6                                                                                                                                    | 6                                                                                                                                                                                                                                      | 3       | 0.1%    |
| 7                                                                                                                                    | 7                                                                                                                                                                                                                                      | 1       | 0.0%    |
| 8                                                                                                                                    | 8                                                                                                                                                                                                                                      | 0       |         |
| 9                                                                                                                                    | 9                                                                                                                                                                                                                                      | 2       | 0.0%    |
| 10                                                                                                                                   | 10                                                                                                                                                                                                                                     | 5       | 0.1%    |
| 11                                                                                                                                   | 11                                                                                                                                                                                                                                     | 1       | 0.0%    |
| 12                                                                                                                                   | 12                                                                                                                                                                                                                                     | 2       | 0.0%    |
| 13                                                                                                                                   | 13                                                                                                                                                                                                                                     | 1       | 0.0%    |
| 14                                                                                                                                   | 14                                                                                                                                                                                                                                     | 1       | 0.0%    |
| 15                                                                                                                                   | 15                                                                                                                                                                                                                                     | 1       | 0.0%    |
| 16                                                                                                                                   | 16                                                                                                                                                                                                                                     | 0       |         |
| 17                                                                                                                                   | 17                                                                                                                                                                                                                                     | 1       | 0.0%    |
| 18                                                                                                                                   | 18                                                                                                                                                                                                                                     | 0       |         |
| 19                                                                                                                                   | 19                                                                                                                                                                                                                                     | 0       |         |
| 20                                                                                                                                   | 20                                                                                                                                                                                                                                     | 0       |         |

| # r7ocreasm3a2_mobile: Hvor viktig er kristen bakgrunn i avgjørelsen om noen får bosette seg i Norge?                                |                                                                                                                                                                                                                           |         |         |
|--------------------------------------------------------------------------------------------------------------------------------------|---------------------------------------------------------------------------------------------------------------------------------------------------------------------------------------------------------------------------|---------|---------|
| Verdi                                                                                                                                | Merkelapp                                                                                                                                                                                                                 | Enheter | Prosent |
| 21                                                                                                                                   | 21                                                                                                                                                                                                                        | 0       |         |
| 22                                                                                                                                   | 22                                                                                                                                                                                                                        | 0       |         |
| 23                                                                                                                                   | 23                                                                                                                                                                                                                        | 0       |         |
| 24                                                                                                                                   | 24                                                                                                                                                                                                                        | 0       |         |
| 25                                                                                                                                   | 25                                                                                                                                                                                                                        | 16      | 0.3%    |
| 26                                                                                                                                   | 26                                                                                                                                                                                                                        | 0       |         |
| 27                                                                                                                                   | 27                                                                                                                                                                                                                        | 1       | 0.0%    |
| 28                                                                                                                                   | 28                                                                                                                                                                                                                        | 0       |         |
| 29                                                                                                                                   | 29                                                                                                                                                                                                                        | 1       | 0.0%    |
| 30                                                                                                                                   | 30                                                                                                                                                                                                                        | 1       | 0.0%    |
| 31                                                                                                                                   | 31                                                                                                                                                                                                                        | 2       | 0.0%    |
| 32                                                                                                                                   | 32                                                                                                                                                                                                                        | 0       |         |
| 33                                                                                                                                   | 33                                                                                                                                                                                                                        | 0       |         |
| 34                                                                                                                                   | 34                                                                                                                                                                                                                        | 0       |         |
| 35                                                                                                                                   | 35                                                                                                                                                                                                                        | 1       | 0.0%    |
| 36                                                                                                                                   | 36                                                                                                                                                                                                                        | 1       | 0.0%    |
| 37                                                                                                                                   | 37                                                                                                                                                                                                                        | 0       |         |
| 38                                                                                                                                   | 38                                                                                                                                                                                                                        | 0       |         |
| 39                                                                                                                                   | 39                                                                                                                                                                                                                        | 0       |         |
| 40                                                                                                                                   | 40                                                                                                                                                                                                                        | 1       | 0.0%    |
| 41                                                                                                                                   | 41                                                                                                                                                                                                                        | 2       | 0.0%    |
| 42                                                                                                                                   | 42                                                                                                                                                                                                                        | 0       |         |
| 43                                                                                                                                   | 43                                                                                                                                                                                                                        | 1       | 0.0%    |
| 44                                                                                                                                   | 44                                                                                                                                                                                                                        | 0       |         |
| 45                                                                                                                                   | 45                                                                                                                                                                                                                        | 0       |         |
| 46                                                                                                                                   | 46                                                                                                                                                                                                                        | 0       |         |
| 47                                                                                                                                   | 47                                                                                                                                                                                                                        | 1       | 0.0%    |
| 48                                                                                                                                   | 48                                                                                                                                                                                                                        | 1       | 0.0%    |
| 49                                                                                                                                   | 49                                                                                                                                                                                                                        | 0       |         |
| 50                                                                                                                                   | Fullstendig                                                                                                                                                                                                               | 2       | 0.0%    |
| 97                                                                                                                                   | Ikke svart                                                                                                                                                                                                                | 0       |         |
| 98                                                                                                                                   | Ikke spurt                                                                                                                                                                                                                | 4602    | 98.1%   |
| Advarsel: disse tallene indikerer antall enheter (cases) i datafilen. De kan ikke tolkes som oppsummert statistikk for populasjonen. |                                                                                                                                                                                                                           |         |         |
| # r7ocreasm3a3: Hvor viktig er kunnskaper og ferdigheter som Norge trenger i avgjørelsen om noen får bosette seg i Norge?            |                                                                                                                                                                                                                           |         |         |
| Informasjon                                                                                                                          | [Type= diskret] [Format=numeric] [Rekkevidde= 0-50] [Missing=*]                                                                                                                                                           |         |         |
| Statistikk [NW/ W]                                                                                                                   | [Gyldige=4689 /-] [Ugyldig=0 /-]                                                                                                                                                                                          |         |         |
| Spørsmålstekst                                                                                                                       | Hvor viktig synes du kunnskaper og ferdigheter som Norge trenger bør være for å avgjøre om noen skal få bosette seg her?                                                                                                  |         |         |
| Instruksjoner til intervjueren                                                                                                       | [Spurt hvis u=2, ran20=1 og R7OCRECSM_mobile2=0. Versjon for PC -og nettbrettbrukere. Mobilbrukere blir spurt R7OCRECSM3A3_mobile.]<br><br>[Slider blir brukt for å avgi svar. Utgangsposisjonen er satt til verdien 25.] |         |         |
| Kommentarer                                                                                                                          | Hvor viktig synes du kunnskaper og ferdigheter som Norge trenger bør være for å avgjøre om noen skal få bosette seg                                                                                                       |         |         |
| Verdi                                                                                                                                | Merkelapp                                                                                                                                                                                                                 | Enheter | Prosent |
| 0                                                                                                                                    | Ikke i det hele tatt                                                                                                                                                                                                      | 29      | 0.6%    |



# r70crecsm3a3: Hvor viktig er kunnskaper og ferdigheter som Norge trenger i avgjørelsen om noen får bosette seg i Norge?

| Verdi | Merkelapp | Enheter | Prosent |
|-------|-----------|---------|---------|
| 1     | 1         | 5       | 0.1%    |
| 2     | 2         | 9       | 0.2%    |
| 3     | 3         | 10      | 0.2%    |
| 4     | 4         | 3       | 0.1%    |
| 5     | 5         | 6       | 0.1%    |
| 6     | 6         | 9       | 0.2%    |
| 7     | 7         | 7       | 0.1%    |
| 8     | 8         | 3       | 0.1%    |
| 9     | 9         | 6       | 0.1%    |
| 10    | 10        | 7       | 0.1%    |
| 11    | 11        | 1       | 0.0%    |
| 12    | 12        | 4       | 0.1%    |
| 13    | 13        | 5       | 0.1%    |
| 14    | 14        | 7       | 0.1%    |
| 15    | 15        | 2       | 0.0%    |
| 16    | 16        | 3       | 0.1%    |
| 17    | 17        | 4       | 0.1%    |
| 18    | 18        | 4       | 0.1%    |
| 19    | 19        | 4       | 0.1%    |
| 20    | 20        | 4       | 0.1%    |
| 21    | 21        | 4       | 0.1%    |
| 22    | 22        | 2       | 0.0%    |
| 23    | 23        | 1       | 0.0%    |
| 24    | 24        | 3       | 0.1%    |
| 25    | 25        | 37      | 0.8%    |
| 26    | 26        | 2       | 0.0%    |
| 27    | 27        | 3       | 0.1%    |
| 28    | 28        | 1       | 0.0%    |
| 29    | 29        | 7       | 0.1%    |
| 30    | 30        | 8       | 0.2%    |
| 31    | 31        | 3       | 0.1%    |
| 32    | 32        | 13      | 0.3%    |
| 33    | 33        | 5       | 0.1%    |
| 34    | 34        | 9       | 0.2%    |
| 35    | 35        | 4       | 0.1%    |
| 36    | 36        | 5       | 0.1%    |
| 37    | 37        | 4       | 0.1%    |
| 38    | 38        | 2       | 0.0%    |
| 39    | 39        | 6       | 0.1%    |
| 40    | 40        | 4       | 0.1%    |
| 41    | 41        | 3       | 0.1%    |
| 42    | 42        | 0       |         |
| 43    | 43        | 4       | 0.1%    |
| 44    | 44        | 3       | 0.1%    |

**# r7ocreasm3a3: Hvor viktig er kunnskaper og ferdigheter som Norge trenger i avgjørelsen om noen får bosette seg i Norge?**

| Verdi | Merkelapp   | Enheter | Prosent |
|-------|-------------|---------|---------|
| 45    | 45          | 2       | 0.0%    |
| 46    | 46          | 1       | 0.0%    |
| 47    | 47          | 1       | 0.0%    |
| 48    | 48          | 2       | 0.0%    |
| 49    | 49          | 0       |         |
| 50    | Fullstendig | 6       | 0.1%    |
| 97    | Ikke svart  | 0       |         |
| 98    | Ikke spurt  | 4412    | 94.1%   |

*Advarsel: disse tallene indikerer antall enheter (cases) i datafilen. De kan ikke tolkes som oppsummert statistikk for populasjonen.*

**# r7ocreasm3a3\_mobile: Hvor viktig er kunnskaper og ferdigheter som Norge trenger i avgjørelsen om noen får bosette seg i Norge?**

|                                       |                                                                                                                                                                                                                                        |
|---------------------------------------|----------------------------------------------------------------------------------------------------------------------------------------------------------------------------------------------------------------------------------------|
| <b>Informasjon</b>                    | [Type= diskret] [Format=numeric] [Rekkevidde= 0-50] [Missing=*]                                                                                                                                                                        |
| <b>Statistikk [NW/ W]</b>             | [Gyldige=4689 /-] [Ugyldig=0 /-]                                                                                                                                                                                                       |
| <b>Spørsmålstekst</b>                 | Hvor viktig synes du kunnskaper og ferdigheter som Norge trenger bør være for å avgjøre om noen skal få bosette seg her?                                                                                                               |
| <b>Instruksjoner til intervjueren</b> | [Spurt hvis u=2, ran20=1 og R7OCRECSM_mobile2=1. Versjon for mobilbrukere på grunn av oppsett. PC- og nettbrettbrukere blir spurt R7OCRECSM3A3.]<br><br>[Slider blir brukt for å avgi svar. Utgangsposisjonen er satt til verdien 25.] |
| <b>Kommentarer</b>                    | Hvor viktig synes du kunnskaper og ferdigheter som Norge trenger bør være for å avgjøre om noen skal få bosette seg                                                                                                                    |

| Verdi | Merkelapp            | Enheter | Prosent |
|-------|----------------------|---------|---------|
| 0     | Ikke i det hele tatt | 7       | 0.1%    |
| 1     | 1                    | 0       |         |
| 2     | 2                    | 1       | 0.0%    |
| 3     | 3                    | 2       | 0.0%    |
| 4     | 4                    | 0       |         |
| 5     | 5                    | 1       | 0.0%    |
| 6     | 6                    | 1       | 0.0%    |
| 7     | 7                    | 2       | 0.0%    |
| 8     | 8                    | 0       |         |
| 9     | 9                    | 2       | 0.0%    |
| 10    | 10                   | 3       | 0.1%    |
| 11    | 11                   | 2       | 0.0%    |
| 12    | 12                   | 1       | 0.0%    |
| 13    | 13                   | 1       | 0.0%    |
| 14    | 14                   | 2       | 0.0%    |
| 15    | 15                   | 0       |         |
| 16    | 16                   | 1       | 0.0%    |
| 17    | 17                   | 1       | 0.0%    |
| 18    | 18                   | 2       | 0.0%    |
| 19    | 19                   | 1       | 0.0%    |
| 20    | 20                   | 0       |         |
| 21    | 21                   | 1       | 0.0%    |
| 22    | 22                   | 0       |         |
| 23    | 23                   | 0       |         |

**# r7ocreasm3a3\_mobile: Hvor viktig er kunnskaper og ferdigheter som Norge trenger i avgjørelsen om noen får bosette seg i Norge?**

| Verdi | Merkelapp   | Enheter | Prosent |
|-------|-------------|---------|---------|
| 24    | 24          | 0       |         |
| 25    | 25          | 18      | 0.4%    |
| 26    | 26          | 1       | 0.0%    |
| 27    | 27          | 0       |         |
| 28    | 28          | 0       |         |
| 29    | 29          | 0       |         |
| 30    | 30          | 1       | 0.0%    |
| 31    | 31          | 4       | 0.1%    |
| 32    | 32          | 0       |         |
| 33    | 33          | 1       | 0.0%    |
| 34    | 34          | 3       | 0.1%    |
| 35    | 35          | 2       | 0.0%    |
| 36    | 36          | 2       | 0.0%    |
| 37    | 37          | 3       | 0.1%    |
| 38    | 38          | 3       | 0.1%    |
| 39    | 39          | 0       |         |
| 40    | 40          | 3       | 0.1%    |
| 41    | 41          | 1       | 0.0%    |
| 42    | 42          | 1       | 0.0%    |
| 43    | 43          | 2       | 0.0%    |
| 44    | 44          | 0       |         |
| 45    | 45          | 0       |         |
| 46    | 46          | 0       |         |
| 47    | 47          | 1       | 0.0%    |
| 48    | 48          | 0       |         |
| 49    | 49          | 0       |         |
| 50    | Fullstendig | 10      | 0.2%    |
| 97    | Ikke svart  | 0       |         |
| 98    | Ikke spurt  | 4602    | 98.1%   |

*Advarsel: disse tallene indikerer antall enheter (cases) i datafilen. De kan ikke tolkes som oppsummert statistikk for populasjonen.*

**# r7ocreasm3b1: Hvor viktig er god utdanning i avgjørelsen om noen får bosette seg i Norge?**

|                                       |                                                                                                                                                                                                                                                    |
|---------------------------------------|----------------------------------------------------------------------------------------------------------------------------------------------------------------------------------------------------------------------------------------------------|
| <b>Informasjon</b>                    | [Type= diskret] [Format=numeric] [Rekkevidde= 0-50] [Missing=*]                                                                                                                                                                                    |
| <b>Statistikk [NW/ W]</b>             | [Gyldige=4689 /-] [Ugyldig=0 /-]                                                                                                                                                                                                                   |
| <b>Tekst før spørsmål</b>             | For å hjelpe oss med å forbedre spørsmålene våre i senere undersøkelser, vil vi til slutt be deg svare på noen spørsmål som ligner på de du har svart på tidligere. Ikke prøv å huske hva du har svart før, men tenk på dem som helt nye spørsmål. |
| <b>Spørsmålstekst</b>                 | Hvor viktig synes du å ha en god utdanning bør være for å avgjøre om noen som er født, oppvokst og bor utenfor Norge skal få bosette seg her?                                                                                                      |
| <b>Instruksjoner til intervjueren</b> | [Spurt hvis u=2, ran20=2 og R7OCRECSM_mobile2=0. Versjon for PC -og nettbrettbrukere. Mobilbrukere blir spurt R7OCRECSM3B1_mobile.]<br><br>[Slider blir brukt for å avgi svar. Utgangsposisjonen er satt til verdien 1.]                           |
| <b>Kommentarer</b>                    | For å hjelpe oss med å forbedre spørsmålene våre i senere undersøkelser, vil vi til slutt be deg svare på noen sp                                                                                                                                  |

| Verdi | Merkelapp            | Enheter | Prosent |
|-------|----------------------|---------|---------|
| 0     | Ikke i det hele tatt | 10      | 0.2%    |

# r7ocrecsm3b1: Hvor viktig er god utdanning i avgjørelsen om noen får bosette seg i Norge?

| Verdi | Merkelapp | Enheter | Prosent |
|-------|-----------|---------|---------|
| 1     | 1         | 45      | 1.0%    |
| 2     | 2         | 2       | 0.0%    |
| 3     | 3         | 2       | 0.0%    |
| 4     | 4         | 6       | 0.1%    |
| 5     | 5         | 5       | 0.1%    |
| 6     | 6         | 5       | 0.1%    |
| 7     | 7         | 3       | 0.1%    |
| 8     | 8         | 4       | 0.1%    |
| 9     | 9         | 5       | 0.1%    |
| 10    | 10        | 3       | 0.1%    |
| 11    | 11        | 7       | 0.1%    |
| 12    | 12        | 8       | 0.2%    |
| 13    | 13        | 1       | 0.0%    |
| 14    | 14        | 5       | 0.1%    |
| 15    | 15        | 6       | 0.1%    |
| 16    | 16        | 6       | 0.1%    |
| 17    | 17        | 6       | 0.1%    |
| 18    | 18        | 6       | 0.1%    |
| 19    | 19        | 6       | 0.1%    |
| 20    | 20        | 3       | 0.1%    |
| 21    | 21        | 4       | 0.1%    |
| 22    | 22        | 5       | 0.1%    |
| 23    | 23        | 2       | 0.0%    |
| 24    | 24        | 16      | 0.3%    |
| 25    | 25        | 17      | 0.4%    |
| 26    | 26        | 5       | 0.1%    |
| 27    | 27        | 7       | 0.1%    |
| 28    | 28        | 6       | 0.1%    |
| 29    | 29        | 5       | 0.1%    |
| 30    | 30        | 7       | 0.1%    |
| 31    | 31        | 6       | 0.1%    |
| 32    | 32        | 7       | 0.1%    |
| 33    | 33        | 10      | 0.2%    |
| 34    | 34        | 6       | 0.1%    |
| 35    | 35        | 5       | 0.1%    |
| 36    | 36        | 8       | 0.2%    |
| 37    | 37        | 5       | 0.1%    |
| 38    | 38        | 5       | 0.1%    |
| 39    | 39        | 2       | 0.0%    |
| 40    | 40        | 3       | 0.1%    |
| 41    | 41        | 1       | 0.0%    |
| 42    | 42        | 2       | 0.0%    |
| 43    | 43        | 3       | 0.1%    |
| 44    | 44        | 2       | 0.0%    |
| 45    | 45        | 2       | 0.0%    |

| # r7ocreasm3b1: Hvor viktig er god utdanning i avgjørelsen om noen får bosette seg i Norge?                                          |                                                                                                                                                                                                                                                    |         |         |
|--------------------------------------------------------------------------------------------------------------------------------------|----------------------------------------------------------------------------------------------------------------------------------------------------------------------------------------------------------------------------------------------------|---------|---------|
| Verdi                                                                                                                                | Merkelapp                                                                                                                                                                                                                                          | Enheter | Prosent |
| 46                                                                                                                                   | 46                                                                                                                                                                                                                                                 | 1       | 0.0%    |
| 47                                                                                                                                   | 47                                                                                                                                                                                                                                                 | 3       | 0.1%    |
| 48                                                                                                                                   | 48                                                                                                                                                                                                                                                 | 0       |         |
| 49                                                                                                                                   | 49                                                                                                                                                                                                                                                 | 1       | 0.0%    |
| 50                                                                                                                                   | Fullstendig                                                                                                                                                                                                                                        | 6       | 0.1%    |
| 97                                                                                                                                   | Ikke svart                                                                                                                                                                                                                                         | 0       |         |
| 98                                                                                                                                   | Ikke spurt                                                                                                                                                                                                                                         | 4393    | 93.7%   |
| Advarsel: disse tallene indikerer antall enheter (cases) i datafilen. De kan ikke tolkes som oppsummert statistikk for populasjonen. |                                                                                                                                                                                                                                                    |         |         |
| # r7ocreasm3b1_mobile: Hvor viktig er god utdanning i avgjørelsen om noen får bosette seg i Norge?                                   |                                                                                                                                                                                                                                                    |         |         |
| Informasjon                                                                                                                          | [Type= diskret] [Format=numeric] [Rekkevidde= 0-50] [Missing=*]                                                                                                                                                                                    |         |         |
| Statistikk [NW/ W]                                                                                                                   | [Gyldige=4689 /-] [Ugyldig=0 /-]                                                                                                                                                                                                                   |         |         |
| Tekst før spørsmål                                                                                                                   | For å hjelpe oss med å forbedre spørsmålene våre i senere undersøkelser, vil vi til slutt be deg svare på noen spørsmål som ligner på de du har svart på tidligere. Ikke prøv å huske hva du har svart før, men tenk på dem som helt nye spørsmål. |         |         |
| Spørsmålstekst                                                                                                                       | Hvor viktig synes du å ha en god utdanning bør være for å avgjøre om noen som er født, oppvokst og bor utenfor Norge skal få bosette seg her?                                                                                                      |         |         |
| Instruksjoner til intervjueren                                                                                                       | [Spurt hvis u=2, ran20=2 og R7OCRECSM_mobile2=1. Versjon for mobilbrukere på grunn av oppsett. PC- og nettbrettbrukere blir spurt R7OCRECSM3B1.]<br><br>[Slider blir brukt for å avgi svar. Utgangsposisjonen er satt til verdien 1.]              |         |         |
| Kommentarer                                                                                                                          | For å hjelpe oss med å forbedre spørsmålene våre i senere undersøkelser, vil vi til slutt be deg svare på noen sp                                                                                                                                  |         |         |
| Verdi                                                                                                                                | Merkelapp                                                                                                                                                                                                                                          | Enheter | Prosent |
| 0                                                                                                                                    | Ikke i det hele tatt                                                                                                                                                                                                                               | 4       | 0.1%    |
| 1                                                                                                                                    | 1                                                                                                                                                                                                                                                  | 26      | 0.6%    |
| 2                                                                                                                                    | 2                                                                                                                                                                                                                                                  | 0       |         |
| 3                                                                                                                                    | 3                                                                                                                                                                                                                                                  | 1       | 0.0%    |
| 4                                                                                                                                    | 4                                                                                                                                                                                                                                                  | 0       |         |
| 5                                                                                                                                    | 5                                                                                                                                                                                                                                                  | 3       | 0.1%    |
| 6                                                                                                                                    | 6                                                                                                                                                                                                                                                  | 3       | 0.1%    |
| 7                                                                                                                                    | 7                                                                                                                                                                                                                                                  | 3       | 0.1%    |
| 8                                                                                                                                    | 8                                                                                                                                                                                                                                                  | 0       |         |
| 9                                                                                                                                    | 9                                                                                                                                                                                                                                                  | 1       | 0.0%    |
| 10                                                                                                                                   | 10                                                                                                                                                                                                                                                 | 0       |         |
| 11                                                                                                                                   | 11                                                                                                                                                                                                                                                 | 2       | 0.0%    |
| 12                                                                                                                                   | 12                                                                                                                                                                                                                                                 | 0       |         |
| 13                                                                                                                                   | 13                                                                                                                                                                                                                                                 | 1       | 0.0%    |
| 14                                                                                                                                   | 14                                                                                                                                                                                                                                                 | 5       | 0.1%    |
| 15                                                                                                                                   | 15                                                                                                                                                                                                                                                 | 1       | 0.0%    |
| 16                                                                                                                                   | 16                                                                                                                                                                                                                                                 | 3       | 0.1%    |
| 17                                                                                                                                   | 17                                                                                                                                                                                                                                                 | 1       | 0.0%    |
| 18                                                                                                                                   | 18                                                                                                                                                                                                                                                 | 1       | 0.0%    |
| 19                                                                                                                                   | 19                                                                                                                                                                                                                                                 | 4       | 0.1%    |
| 20                                                                                                                                   | 20                                                                                                                                                                                                                                                 | 2       | 0.0%    |
| 21                                                                                                                                   | 21                                                                                                                                                                                                                                                 | 3       | 0.1%    |
| 22                                                                                                                                   | 22                                                                                                                                                                                                                                                 | 1       | 0.0%    |
| 23                                                                                                                                   | 23                                                                                                                                                                                                                                                 | 1       | 0.0%    |

| # r7ocreasm3b1_mobile: Hvor viktig er god utdanning i avgjørelsen om noen får bosette seg i Norge?                                   |                                                                                                                                                                                                                          |         |         |
|--------------------------------------------------------------------------------------------------------------------------------------|--------------------------------------------------------------------------------------------------------------------------------------------------------------------------------------------------------------------------|---------|---------|
| Verdi                                                                                                                                | Merkelapp                                                                                                                                                                                                                | Enheter | Prosent |
| 24                                                                                                                                   | 24                                                                                                                                                                                                                       | 1       | 0.0%    |
| 25                                                                                                                                   | 25                                                                                                                                                                                                                       | 1       | 0.0%    |
| 26                                                                                                                                   | 26                                                                                                                                                                                                                       | 2       | 0.0%    |
| 27                                                                                                                                   | 27                                                                                                                                                                                                                       | 2       | 0.0%    |
| 28                                                                                                                                   | 28                                                                                                                                                                                                                       | 1       | 0.0%    |
| 29                                                                                                                                   | 29                                                                                                                                                                                                                       | 1       | 0.0%    |
| 30                                                                                                                                   | 30                                                                                                                                                                                                                       | 3       | 0.1%    |
| 31                                                                                                                                   | 31                                                                                                                                                                                                                       | 0       |         |
| 32                                                                                                                                   | 32                                                                                                                                                                                                                       | 3       | 0.1%    |
| 33                                                                                                                                   | 33                                                                                                                                                                                                                       | 2       | 0.0%    |
| 34                                                                                                                                   | 34                                                                                                                                                                                                                       | 0       |         |
| 35                                                                                                                                   | 35                                                                                                                                                                                                                       | 0       |         |
| 36                                                                                                                                   | 36                                                                                                                                                                                                                       | 2       | 0.0%    |
| 37                                                                                                                                   | 37                                                                                                                                                                                                                       | 2       | 0.0%    |
| 38                                                                                                                                   | 38                                                                                                                                                                                                                       | 2       | 0.0%    |
| 39                                                                                                                                   | 39                                                                                                                                                                                                                       | 2       | 0.0%    |
| 40                                                                                                                                   | 40                                                                                                                                                                                                                       | 4       | 0.1%    |
| 41                                                                                                                                   | 41                                                                                                                                                                                                                       | 1       | 0.0%    |
| 42                                                                                                                                   | 42                                                                                                                                                                                                                       | 1       | 0.0%    |
| 43                                                                                                                                   | 43                                                                                                                                                                                                                       | 2       | 0.0%    |
| 44                                                                                                                                   | 44                                                                                                                                                                                                                       | 1       | 0.0%    |
| 45                                                                                                                                   | 45                                                                                                                                                                                                                       | 1       | 0.0%    |
| 46                                                                                                                                   | 46                                                                                                                                                                                                                       | 0       |         |
| 47                                                                                                                                   | 47                                                                                                                                                                                                                       | 1       | 0.0%    |
| 48                                                                                                                                   | 48                                                                                                                                                                                                                       | 2       | 0.0%    |
| 49                                                                                                                                   | 49                                                                                                                                                                                                                       | 0       |         |
| 50                                                                                                                                   | Fullstendig                                                                                                                                                                                                              | 5       | 0.1%    |
| 97                                                                                                                                   | Ikke svart                                                                                                                                                                                                               | 0       |         |
| 98                                                                                                                                   | Ikke spurt                                                                                                                                                                                                               | 4581    | 97.7%   |
| Advarsel: disse tallene indikerer antall enheter (cases) i datafilen. De kan ikke tolkes som oppsummert statistikk for populasjonen. |                                                                                                                                                                                                                          |         |         |
| # r7ocreasm3b2: Hvor viktig er kristen bakgrunn i avgjørelsen om noen får bosette seg i Norge?                                       |                                                                                                                                                                                                                          |         |         |
| Informasjon                                                                                                                          | [Type= diskret] [Format=numeric] [Rekkevidde= 0-50] [Missing=*]                                                                                                                                                          |         |         |
| Statistikk [NW/ W]                                                                                                                   | [Gyldige=4689 /-] [Ugyldig=0 /-]                                                                                                                                                                                         |         |         |
| Spørsmålstekst                                                                                                                       | Hvor viktig synes du en kristen bakgrunn bør være for å avgjøre om noen skal få bosette seg her?                                                                                                                         |         |         |
| Instruksjoner til intervjueren                                                                                                       | [Spurt hvis u=2, ran20=2 og R7OCRECSM_mobile2=0. Versjon for PC -og nettbrettbrukere. Mobilbrukere blir spurt R7OCRECSM3B2_mobile.]<br><br>[Slider blir brukt for å avgi svar. Utgangsposisjonen er satt til verdien 1.] |         |         |
| Kommentarer                                                                                                                          | Hvor viktig synes du en kristen bakgrunn bør være for å avgjøre om noen skal få bosette seg her? ^f('R7OCRECSM_skal                                                                                                      |         |         |
| Verdi                                                                                                                                | Merkelapp                                                                                                                                                                                                                | Enheter | Prosent |
| 0                                                                                                                                    | Ikke i det hele tatt                                                                                                                                                                                                     | 36      | 0.8%    |
| 1                                                                                                                                    | 1                                                                                                                                                                                                                        | 112     | 2.4%    |
| 2                                                                                                                                    | 2                                                                                                                                                                                                                        | 5       | 0.1%    |
| 3                                                                                                                                    | 3                                                                                                                                                                                                                        | 2       | 0.0%    |
| 4                                                                                                                                    | 4                                                                                                                                                                                                                        | 5       | 0.1%    |

# r7ocreasm3b2: Hvor viktig er kristen bakgrunn i avgjørelsen om noen får bosette seg i Norge?

| Verdi | Merkelapp | Enheter | Prosent |
|-------|-----------|---------|---------|
| 5     | 5         | 9       | 0.2%    |
| 6     | 6         | 3       | 0.1%    |
| 7     | 7         | 6       | 0.1%    |
| 8     | 8         | 4       | 0.1%    |
| 9     | 9         | 5       | 0.1%    |
| 10    | 10        | 1       | 0.0%    |
| 11    | 11        | 3       | 0.1%    |
| 12    | 12        | 6       | 0.1%    |
| 13    | 13        | 6       | 0.1%    |
| 14    | 14        | 4       | 0.1%    |
| 15    | 15        | 6       | 0.1%    |
| 16    | 16        | 3       | 0.1%    |
| 17    | 17        | 4       | 0.1%    |
| 18    | 18        | 3       | 0.1%    |
| 19    | 19        | 2       | 0.0%    |
| 20    | 20        | 6       | 0.1%    |
| 21    | 21        | 1       | 0.0%    |
| 22    | 22        | 3       | 0.1%    |
| 23    | 23        | 2       | 0.0%    |
| 24    | 24        | 6       | 0.1%    |
| 25    | 25        | 12      | 0.3%    |
| 26    | 26        | 5       | 0.1%    |
| 27    | 27        | 2       | 0.0%    |
| 28    | 28        | 1       | 0.0%    |
| 29    | 29        | 3       | 0.1%    |
| 30    | 30        | 5       | 0.1%    |
| 31    | 31        | 2       | 0.0%    |
| 32    | 32        | 0       |         |
| 33    | 33        | 1       | 0.0%    |
| 34    | 34        | 2       | 0.0%    |
| 35    | 35        | 1       | 0.0%    |
| 36    | 36        | 5       | 0.1%    |
| 37    | 37        | 2       | 0.0%    |
| 38    | 38        | 1       | 0.0%    |
| 39    | 39        | 0       |         |
| 40    | 40        | 1       | 0.0%    |
| 41    | 41        | 1       | 0.0%    |
| 42    | 42        | 1       | 0.0%    |
| 43    | 43        | 0       |         |
| 44    | 44        | 0       |         |
| 45    | 45        | 1       | 0.0%    |
| 46    | 46        | 2       | 0.0%    |
| 47    | 47        | 0       |         |
| 48    | 48        | 0       |         |
| 49    | 49        | 0       |         |

| # r7ocreasm3b2: Hvor viktig er kristen bakgrunn i avgjørelsen om noen får bosette seg i Norge?                                       |                                                                                                                                                                                                                                       |         |         |
|--------------------------------------------------------------------------------------------------------------------------------------|---------------------------------------------------------------------------------------------------------------------------------------------------------------------------------------------------------------------------------------|---------|---------|
| Verdi                                                                                                                                | Merkelapp                                                                                                                                                                                                                             | Enheter | Prosent |
| 50                                                                                                                                   | Fullstendig                                                                                                                                                                                                                           | 5       | 0.1%    |
| 97                                                                                                                                   | Ikke svart                                                                                                                                                                                                                            | 0       |         |
| 98                                                                                                                                   | Ikke spurt                                                                                                                                                                                                                            | 4393    | 93.7%   |
| Advarsel: disse tallene indikerer antall enheter (cases) i datafilen. De kan ikke tolkes som oppsummert statistikk for populasjonen. |                                                                                                                                                                                                                                       |         |         |
| # r7ocreasm3b2_mobile: Hvor viktig er kristen bakgrunn i avgjørelsen om noen får bosette seg i Norge?                                |                                                                                                                                                                                                                                       |         |         |
| Informasjon                                                                                                                          | [Type= diskret] [Format=numeric] [Rekkevidde= 0-50] [Missing=*]                                                                                                                                                                       |         |         |
| Statistikk [NW/ W]                                                                                                                   | [Gyldige=4689 /-] [Ugyldig=0 /-]                                                                                                                                                                                                      |         |         |
| Spørsmålstekst                                                                                                                       | Hvor viktig synes du en kristen bakgrunn bør være for å avgjøre om noen skal få bosette seg her?                                                                                                                                      |         |         |
| Instruksjoner til intervjueren                                                                                                       | [Spurt hvis u=2, ran20=2 og R7OCRECSM_mobile2=1. Versjon for mobilbrukere på grunn av oppsett. PC- og nettbrettbrukere blir spurt R7OCRECSM3B2.]<br><br>[Slider blir brukt for å avgi svar. Utgangsposisjonen er satt til verdien 1.] |         |         |
| Kommentarer                                                                                                                          | Hvor viktig synes du en kristen bakgrunn bør være for å avgjøre om noen skal få bosette seg her?                                                                                                                                      |         |         |
| Verdi                                                                                                                                | Merkelapp                                                                                                                                                                                                                             | Enheter | Prosent |
| 0                                                                                                                                    | Ikke i det hele tatt                                                                                                                                                                                                                  | 18      | 0.4%    |
| 1                                                                                                                                    | 1                                                                                                                                                                                                                                     | 49      | 1.0%    |
| 2                                                                                                                                    | 2                                                                                                                                                                                                                                     | 0       |         |
| 3                                                                                                                                    | 3                                                                                                                                                                                                                                     | 1       | 0.0%    |
| 4                                                                                                                                    | 4                                                                                                                                                                                                                                     | 0       |         |
| 5                                                                                                                                    | 5                                                                                                                                                                                                                                     | 0       |         |
| 6                                                                                                                                    | 6                                                                                                                                                                                                                                     | 2       | 0.0%    |
| 7                                                                                                                                    | 7                                                                                                                                                                                                                                     | 2       | 0.0%    |
| 8                                                                                                                                    | 8                                                                                                                                                                                                                                     | 1       | 0.0%    |
| 9                                                                                                                                    | 9                                                                                                                                                                                                                                     | 1       | 0.0%    |
| 10                                                                                                                                   | 10                                                                                                                                                                                                                                    | 1       | 0.0%    |
| 11                                                                                                                                   | 11                                                                                                                                                                                                                                    | 0       |         |
| 12                                                                                                                                   | 12                                                                                                                                                                                                                                    | 1       | 0.0%    |
| 13                                                                                                                                   | 13                                                                                                                                                                                                                                    | 0       |         |
| 14                                                                                                                                   | 14                                                                                                                                                                                                                                    | 0       |         |
| 15                                                                                                                                   | 15                                                                                                                                                                                                                                    | 0       |         |
| 16                                                                                                                                   | 16                                                                                                                                                                                                                                    | 2       | 0.0%    |
| 17                                                                                                                                   | 17                                                                                                                                                                                                                                    | 1       | 0.0%    |
| 18                                                                                                                                   | 18                                                                                                                                                                                                                                    | 0       |         |
| 19                                                                                                                                   | 19                                                                                                                                                                                                                                    | 0       |         |
| 20                                                                                                                                   | 20                                                                                                                                                                                                                                    | 3       | 0.1%    |
| 21                                                                                                                                   | 21                                                                                                                                                                                                                                    | 1       | 0.0%    |
| 22                                                                                                                                   | 22                                                                                                                                                                                                                                    | 1       | 0.0%    |
| 23                                                                                                                                   | 23                                                                                                                                                                                                                                    | 1       | 0.0%    |
| 24                                                                                                                                   | 24                                                                                                                                                                                                                                    | 2       | 0.0%    |
| 25                                                                                                                                   | 25                                                                                                                                                                                                                                    | 0       |         |
| 26                                                                                                                                   | 26                                                                                                                                                                                                                                    | 2       | 0.0%    |
| 27                                                                                                                                   | 27                                                                                                                                                                                                                                    | 1       | 0.0%    |
| 28                                                                                                                                   | 28                                                                                                                                                                                                                                    | 2       | 0.0%    |
| 29                                                                                                                                   | 29                                                                                                                                                                                                                                    | 2       | 0.0%    |
| 30                                                                                                                                   | 30                                                                                                                                                                                                                                    | 0       |         |



| # r7ocreasm3b2_mobile: Hvor viktig er kristen bakgrunn i avgjørelsen om noen får bosette seg i Norge?                                |                                                                                                                                                                                                                          |         |         |
|--------------------------------------------------------------------------------------------------------------------------------------|--------------------------------------------------------------------------------------------------------------------------------------------------------------------------------------------------------------------------|---------|---------|
| Verdi                                                                                                                                | Merkelapp                                                                                                                                                                                                                | Enheter | Prosent |
| 31                                                                                                                                   | 31                                                                                                                                                                                                                       | 1       | 0.0%    |
| 32                                                                                                                                   | 32                                                                                                                                                                                                                       | 0       |         |
| 33                                                                                                                                   | 33                                                                                                                                                                                                                       | 2       | 0.0%    |
| 34                                                                                                                                   | 34                                                                                                                                                                                                                       | 0       |         |
| 35                                                                                                                                   | 35                                                                                                                                                                                                                       | 1       | 0.0%    |
| 36                                                                                                                                   | 36                                                                                                                                                                                                                       | 0       |         |
| 37                                                                                                                                   | 37                                                                                                                                                                                                                       | 0       |         |
| 38                                                                                                                                   | 38                                                                                                                                                                                                                       | 0       |         |
| 39                                                                                                                                   | 39                                                                                                                                                                                                                       | 3       | 0.1%    |
| 40                                                                                                                                   | 40                                                                                                                                                                                                                       | 1       | 0.0%    |
| 41                                                                                                                                   | 41                                                                                                                                                                                                                       | 0       |         |
| 42                                                                                                                                   | 42                                                                                                                                                                                                                       | 1       | 0.0%    |
| 43                                                                                                                                   | 43                                                                                                                                                                                                                       | 2       | 0.0%    |
| 44                                                                                                                                   | 44                                                                                                                                                                                                                       | 0       |         |
| 45                                                                                                                                   | 45                                                                                                                                                                                                                       | 0       |         |
| 46                                                                                                                                   | 46                                                                                                                                                                                                                       | 0       |         |
| 47                                                                                                                                   | 47                                                                                                                                                                                                                       | 0       |         |
| 48                                                                                                                                   | 48                                                                                                                                                                                                                       | 1       | 0.0%    |
| 49                                                                                                                                   | 49                                                                                                                                                                                                                       | 0       |         |
| 50                                                                                                                                   | Fullstendig                                                                                                                                                                                                              | 2       | 0.0%    |
| 97                                                                                                                                   | Ikke svart                                                                                                                                                                                                               | 0       |         |
| 98                                                                                                                                   | Ikke spurt                                                                                                                                                                                                               | 4581    | 97.7%   |
| Advarsel: disse tallene indikerer antall enheter (cases) i datafilen. De kan ikke tolkes som oppsummert statistikk for populasjonen. |                                                                                                                                                                                                                          |         |         |
| # r7ocreasm3b3: Hvor viktig er kunnskaper og ferdigheter som Norge trenger i avgjørelsen om noen får bosette seg i Norge?            |                                                                                                                                                                                                                          |         |         |
| Informasjon                                                                                                                          | [Type= diskret] [Format=numeric] [Rekkevidde= 0-50] [Missing=*]                                                                                                                                                          |         |         |
| Statistikk [NW/ W]                                                                                                                   | [Gyldige=4689 /-] [Ugyldig=0 /-]                                                                                                                                                                                         |         |         |
| Spørsmålstekst                                                                                                                       | Hvor viktig synes du kunnskaper og ferdigheter som Norge trenger bør være for å avgjøre om noen skal få bosette seg her?                                                                                                 |         |         |
| Instruksjoner til intervjueren                                                                                                       | [Spurt hvis u=2, ran20=2 og R7OCRECSM_mobile2=0. Versjon for PC -og nettbrettbrukere. Mobilbrukere blir spurt R7OCRECSM3B3_mobile.]<br><br>[Slider blir brukt for å avgi svar. Utgangsposisjonen er satt til verdien 1.] |         |         |
| Kommentarer                                                                                                                          | Hvor viktig synes du kunnskaper og ferdigheter som Norge trenger bør være for å avgjøre om noen skal få bosette seg                                                                                                      |         |         |
| Verdi                                                                                                                                | Merkelapp                                                                                                                                                                                                                | Enheter | Prosent |
| 0                                                                                                                                    | Ikke i det hele tatt                                                                                                                                                                                                     | 5       | 0.1%    |
| 1                                                                                                                                    | 1                                                                                                                                                                                                                        | 42      | 0.9%    |
| 2                                                                                                                                    | 2                                                                                                                                                                                                                        | 1       | 0.0%    |
| 3                                                                                                                                    | 3                                                                                                                                                                                                                        | 2       | 0.0%    |
| 4                                                                                                                                    | 4                                                                                                                                                                                                                        | 3       | 0.1%    |
| 5                                                                                                                                    | 5                                                                                                                                                                                                                        | 4       | 0.1%    |
| 6                                                                                                                                    | 6                                                                                                                                                                                                                        | 6       | 0.1%    |
| 7                                                                                                                                    | 7                                                                                                                                                                                                                        | 3       | 0.1%    |
| 8                                                                                                                                    | 8                                                                                                                                                                                                                        | 5       | 0.1%    |
| 9                                                                                                                                    | 9                                                                                                                                                                                                                        | 10      | 0.2%    |
| 10                                                                                                                                   | 10                                                                                                                                                                                                                       | 7       | 0.1%    |

# r7ocrecsm3b3: Hvor viktig er kunnskaper og ferdigheter som Norge trenger i avgjørelsen om noen får bosette seg i Norge?

| Verdi | Merkelapp   | Enheter | Prosent |
|-------|-------------|---------|---------|
| 11    | 11          | 5       | 0.1%    |
| 12    | 12          | 7       | 0.1%    |
| 13    | 13          | 4       | 0.1%    |
| 14    | 14          | 6       | 0.1%    |
| 15    | 15          | 4       | 0.1%    |
| 16    | 16          | 3       | 0.1%    |
| 17    | 17          | 4       | 0.1%    |
| 18    | 18          | 3       | 0.1%    |
| 19    | 19          | 2       | 0.0%    |
| 20    | 20          | 2       | 0.0%    |
| 21    | 21          | 3       | 0.1%    |
| 22    | 22          | 5       | 0.1%    |
| 23    | 23          | 4       | 0.1%    |
| 24    | 24          | 7       | 0.1%    |
| 25    | 25          | 10      | 0.2%    |
| 26    | 26          | 11      | 0.2%    |
| 27    | 27          | 9       | 0.2%    |
| 28    | 28          | 8       | 0.2%    |
| 29    | 29          | 11      | 0.2%    |
| 30    | 30          | 8       | 0.2%    |
| 31    | 31          | 4       | 0.1%    |
| 32    | 32          | 6       | 0.1%    |
| 33    | 33          | 13      | 0.3%    |
| 34    | 34          | 9       | 0.2%    |
| 35    | 35          | 8       | 0.2%    |
| 36    | 36          | 6       | 0.1%    |
| 37    | 37          | 6       | 0.1%    |
| 38    | 38          | 5       | 0.1%    |
| 39    | 39          | 9       | 0.2%    |
| 40    | 40          | 4       | 0.1%    |
| 41    | 41          | 2       | 0.0%    |
| 42    | 42          | 2       | 0.0%    |
| 43    | 43          | 1       | 0.0%    |
| 44    | 44          | 2       | 0.0%    |
| 45    | 45          | 0       |         |
| 46    | 46          | 0       |         |
| 47    | 47          | 4       | 0.1%    |
| 48    | 48          | 0       |         |
| 49    | 49          | 1       | 0.0%    |
| 50    | Fullstendig | 10      | 0.2%    |
| 97    | Ikke svart  | 0       |         |
| 98    | Ikke spurt  | 4393    | 93.7%   |

Advarsel: disse tallene indikerer antall enheter (cases) i datafilen. De kan ikke tolkes som oppsummert statistikk for populasjonen.

| # r7ocreasm3b3_mobile: Hvor viktig er kunnskaper og ferdigheter som Norge trenger i avgjørelsen om noen får bosette seg i Norge? |                                                                                                                                                                                                                                       |         |         |
|----------------------------------------------------------------------------------------------------------------------------------|---------------------------------------------------------------------------------------------------------------------------------------------------------------------------------------------------------------------------------------|---------|---------|
| Informasjon                                                                                                                      | [Type= diskret] [Format=numeric] [Rekkevidde= 0-50] [Missing=*]                                                                                                                                                                       |         |         |
| Statistikk [NW/ W]                                                                                                               | [Gyldige=4689 /-] [Ugyldig=0 /-]                                                                                                                                                                                                      |         |         |
| Spørsmålstekst                                                                                                                   | Hvor viktig synes du kunnskaper og ferdigheter som Norge trenger bør være for å avgjøre om noen skal få bosette seg her?                                                                                                              |         |         |
| Instruksjoner til intervjueren                                                                                                   | [Spurt hvis u=2, ran20=2 og R7OCRECSM_mobile2=1. Versjon for mobilbrukere på grunn av oppsett. PC- og nettbrettbrukere blir spurt R7OCRECSM3B3.]<br><br>[Slider blir brukt for å avgi svar. Utgangsposisjonen er satt til verdien 1.] |         |         |
| Kommentarer                                                                                                                      | Hvor viktig synes du kunnskaper og ferdigheter som Norge trenger bør være for å avgjøre om noen skal få bosette seg                                                                                                                   |         |         |
| Verdi                                                                                                                            | Merkelapp                                                                                                                                                                                                                             | Enheter | Prosent |
| 0                                                                                                                                | Ikke i det hele tatt                                                                                                                                                                                                                  | 2       | 0.0%    |
| 1                                                                                                                                | 1                                                                                                                                                                                                                                     | 21      | 0.4%    |
| 2                                                                                                                                | 2                                                                                                                                                                                                                                     | 1       | 0.0%    |
| 3                                                                                                                                | 3                                                                                                                                                                                                                                     | 0       |         |
| 4                                                                                                                                | 4                                                                                                                                                                                                                                     | 3       | 0.1%    |
| 5                                                                                                                                | 5                                                                                                                                                                                                                                     | 0       |         |
| 6                                                                                                                                | 6                                                                                                                                                                                                                                     | 0       |         |
| 7                                                                                                                                | 7                                                                                                                                                                                                                                     | 2       | 0.0%    |
| 8                                                                                                                                | 8                                                                                                                                                                                                                                     | 0       |         |
| 9                                                                                                                                | 9                                                                                                                                                                                                                                     | 5       | 0.1%    |
| 10                                                                                                                               | 10                                                                                                                                                                                                                                    | 2       | 0.0%    |
| 11                                                                                                                               | 11                                                                                                                                                                                                                                    | 1       | 0.0%    |
| 12                                                                                                                               | 12                                                                                                                                                                                                                                    | 3       | 0.1%    |
| 13                                                                                                                               | 13                                                                                                                                                                                                                                    | 5       | 0.1%    |
| 14                                                                                                                               | 14                                                                                                                                                                                                                                    | 1       | 0.0%    |
| 15                                                                                                                               | 15                                                                                                                                                                                                                                    | 1       | 0.0%    |
| 16                                                                                                                               | 16                                                                                                                                                                                                                                    | 2       | 0.0%    |
| 17                                                                                                                               | 17                                                                                                                                                                                                                                    | 3       | 0.1%    |
| 18                                                                                                                               | 18                                                                                                                                                                                                                                    | 0       |         |
| 19                                                                                                                               | 19                                                                                                                                                                                                                                    | 0       |         |
| 20                                                                                                                               | 20                                                                                                                                                                                                                                    | 0       |         |
| 21                                                                                                                               | 21                                                                                                                                                                                                                                    | 1       | 0.0%    |
| 22                                                                                                                               | 22                                                                                                                                                                                                                                    | 0       |         |
| 23                                                                                                                               | 23                                                                                                                                                                                                                                    | 1       | 0.0%    |
| 24                                                                                                                               | 24                                                                                                                                                                                                                                    | 3       | 0.1%    |
| 25                                                                                                                               | 25                                                                                                                                                                                                                                    | 0       |         |
| 26                                                                                                                               | 26                                                                                                                                                                                                                                    | 0       |         |
| 27                                                                                                                               | 27                                                                                                                                                                                                                                    | 1       | 0.0%    |
| 28                                                                                                                               | 28                                                                                                                                                                                                                                    | 2       | 0.0%    |
| 29                                                                                                                               | 29                                                                                                                                                                                                                                    | 4       | 0.1%    |
| 30                                                                                                                               | 30                                                                                                                                                                                                                                    | 3       | 0.1%    |
| 31                                                                                                                               | 31                                                                                                                                                                                                                                    | 5       | 0.1%    |
| 32                                                                                                                               | 32                                                                                                                                                                                                                                    | 3       | 0.1%    |
| 33                                                                                                                               | 33                                                                                                                                                                                                                                    | 0       |         |
| 34                                                                                                                               | 34                                                                                                                                                                                                                                    | 3       | 0.1%    |
| 35                                                                                                                               | 35                                                                                                                                                                                                                                    | 1       | 0.0%    |

### # r7ocreasm3b3\_mobile: Hvor viktig er kunnskaper og ferdigheter som Norge trenger i avgjørelsen om noen får bosette seg i Norge?

| Verdi | Merkelapp   | Enheter | Prosent |
|-------|-------------|---------|---------|
| 36    | 36          | 1       | 0.0%    |
| 37    | 37          | 0       |         |
| 38    | 38          | 3       | 0.1%    |
| 39    | 39          | 1       | 0.0%    |
| 40    | 40          | 1       | 0.0%    |
| 41    | 41          | 1       | 0.0%    |
| 42    | 42          | 1       | 0.0%    |
| 43    | 43          | 3       | 0.1%    |
| 44    | 44          | 4       | 0.1%    |
| 45    | 45          | 1       | 0.0%    |
| 46    | 46          | 2       | 0.0%    |
| 47    | 47          | 4       | 0.1%    |
| 48    | 48          | 1       | 0.0%    |
| 49    | 49          | 1       | 0.0%    |
| 50    | Fullstendig | 5       | 0.1%    |
| 97    | Ikke svart  | 0       |         |
| 98    | Ikke spurt  | 4581    | 97.7%   |

Advarsel: disse tallene indikerer antall enheter (cases) i datafilen. De kan ikke tolkes som oppsummert statistikk for populasjonen.

### # r7ocreasm3c1\_1: Hvor viktig er god utdanning i avgjørelsen om noen får bosette seg i Norge?

|                                       |                                                                                                                                               |
|---------------------------------------|-----------------------------------------------------------------------------------------------------------------------------------------------|
| <b>Informasjon</b>                    | [Type= diskret] [Format=numeric] [Rekkevidde= 1-5] [Missing=*]                                                                                |
| <b>Statistikk [NW/ W]</b>             | [Gyldige=4689 /-] [Ugyldig=0 /-]                                                                                                              |
| <b>Spørsmålstekst</b>                 | Hvor viktig synes du å ha en god utdanning bør være for å avgjøre om noen som er født, oppvokst og bor utenfor Norge skal få bosette seg her? |
| <b>Instruksjoner til intervjueren</b> | [Spurt hvis u=2 og ran20=3. ]                                                                                                                 |
| <b>Kommentarer</b>                    | R7OCRECSM3C1_1 (Hvor viktig synes du å ha en god utdanning bør være for å avgjøre om noen som er født, oppvokst og                            |

| Verdi | Merkelapp            | Enheter | Prosent |
|-------|----------------------|---------|---------|
| 1     | Ikke i det hele tatt | 122     | 2.6%    |
| 2     | 2                    | 99      | 2.1%    |
| 3     | 3                    | 109     | 2.3%    |
| 4     | 4                    | 57      | 1.2%    |
| 5     | Fullstendig          | 16      | 0.3%    |
| 97    | Ikke svart           | 14      | 0.3%    |
| 98    | Ikke spurt           | 4272    | 91.1%   |

Advarsel: disse tallene indikerer antall enheter (cases) i datafilen. De kan ikke tolkes som oppsummert statistikk for populasjonen.

### # r7ocreasm3c2\_1: Hvor viktig er kristen bakgrunn i avgjørelsen om noen får bosette seg i Norge?

|                                       |                                                                                                                    |
|---------------------------------------|--------------------------------------------------------------------------------------------------------------------|
| <b>Informasjon</b>                    | [Type= diskret] [Format=numeric] [Rekkevidde= 1-5] [Missing=*]                                                     |
| <b>Statistikk [NW/ W]</b>             | [Gyldige=4689 /-] [Ugyldig=0 /-]                                                                                   |
| <b>Spørsmålstekst</b>                 | Hvor viktig synes du en kristen bakgrunn bør være for å avgjøre om noen skal få bosette seg her?                   |
| <b>Instruksjoner til intervjueren</b> | [Spurt hvis u=2 og ran20=3. ]                                                                                      |
| <b>Kommentarer</b>                    | R7OCRECSM3C2_1 (Hvor viktig synes du en kristen bakgrunn bør være for å avgjøre om noen skal få bosette seg her? ) |

| # r7ocreasm3c2_1: Hvor viktig er kristen bakgrunn i avgjørelsen om noen får bosette seg i Norge?                                     |                                                                                                                                                                                                                           |         |                              |
|--------------------------------------------------------------------------------------------------------------------------------------|---------------------------------------------------------------------------------------------------------------------------------------------------------------------------------------------------------------------------|---------|------------------------------|
| Verdi                                                                                                                                | Merkelapp                                                                                                                                                                                                                 | Enheter | Prosent                      |
| 1                                                                                                                                    | Ikke i det hele tatt                                                                                                                                                                                                      | 264     | <div><div></div></div> 5.6%  |
| 2                                                                                                                                    | 2                                                                                                                                                                                                                         | 47      | <div><div></div></div> 1.0%  |
| 3                                                                                                                                    | 3                                                                                                                                                                                                                         | 51      | <div><div></div></div> 1.1%  |
| 4                                                                                                                                    | 4                                                                                                                                                                                                                         | 29      | <div><div></div></div> 0.6%  |
| 5                                                                                                                                    | Fullstendig                                                                                                                                                                                                               | 10      | <div><div></div></div> 0.2%  |
| 97                                                                                                                                   | Ikke svart                                                                                                                                                                                                                | 16      | <div><div></div></div> 0.3%  |
| 98                                                                                                                                   | Ikke spurt                                                                                                                                                                                                                | 4272    | <div><div></div></div> 91.1% |
| Advarsel: disse tallene indikerer antall enheter (cases) i datafilen. De kan ikke tolkes som oppsummert statistikk for populasjonen. |                                                                                                                                                                                                                           |         |                              |
| # r7ocreasm3c3_1: Hvor viktig er kunnskaper og ferdigheter som Norge trenger i avgjørelsen om noen får bosette seg i Norge?          |                                                                                                                                                                                                                           |         |                              |
| Informasjon                                                                                                                          | [Type= diskret] [Format=numeric] [Rekkevidde= 1-5] [Missing=*]                                                                                                                                                            |         |                              |
| Statistikk [NW/ W]                                                                                                                   | [Gyldige=4689 /-] [Ugyldig=0 /-]                                                                                                                                                                                          |         |                              |
| Spørsmålstekst                                                                                                                       | Hvor viktig synes du kunnskaper og ferdigheter som Norge trenger bør være for å avgjøre om noen skal få bosette seg her?                                                                                                  |         |                              |
| Instruksjoner til intervjueren                                                                                                       | [Spurt hvis u=2 og ran20=3. ]                                                                                                                                                                                             |         |                              |
| Kommentarer                                                                                                                          | R7OCRECSM3C3_1 (Hvor viktig synes du kunnskaper og ferdigheter som Norge trenger bør være for å avgjøre om noen skal                                                                                                      |         |                              |
| Verdi                                                                                                                                | Merkelapp                                                                                                                                                                                                                 | Enheter | Prosent                      |
| 1                                                                                                                                    | Ikke i det hele tatt                                                                                                                                                                                                      | 91      | <div><div></div></div> 1.9%  |
| 2                                                                                                                                    | 2                                                                                                                                                                                                                         | 96      | <div><div></div></div> 2.0%  |
| 3                                                                                                                                    | 3                                                                                                                                                                                                                         | 108     | <div><div></div></div> 2.3%  |
| 4                                                                                                                                    | 4                                                                                                                                                                                                                         | 82      | <div><div></div></div> 1.7%  |
| 5                                                                                                                                    | Fullstendig                                                                                                                                                                                                               | 26      | <div><div></div></div> 0.6%  |
| 97                                                                                                                                   | Ikke svart                                                                                                                                                                                                                | 14      | <div><div></div></div> 0.3%  |
| 98                                                                                                                                   | Ikke spurt                                                                                                                                                                                                                | 4272    | <div><div></div></div> 91.1% |
| Advarsel: disse tallene indikerer antall enheter (cases) i datafilen. De kan ikke tolkes som oppsummert statistikk for populasjonen. |                                                                                                                                                                                                                           |         |                              |
| # r7ocreasm4a1: I hvilken grad bør Høyesteretts makt i kontroversielle saker reduseres?                                              |                                                                                                                                                                                                                           |         |                              |
| Informasjon                                                                                                                          | [Type= diskret] [Format=numeric] [Rekkevidde= 0-50] [Missing=*]                                                                                                                                                           |         |                              |
| Statistikk [NW/ W]                                                                                                                   | [Gyldige=4689 /-] [Ugyldig=0 /-]                                                                                                                                                                                          |         |                              |
| Spørsmålstekst                                                                                                                       | Generelt sett, i hvilken grad mener du at Norges Høyesteretts makt til å avgjøre visse typer kontroversielle saker bør reduseres?                                                                                         |         |                              |
| Instruksjoner til intervjueren                                                                                                       | [Spurt hvis u=2, ran20=1 og R7OCRECSM_mobile2=0. Versjon for PC -og nettbrettbrukere. Mobilbrukere blir spurt R7OCRECSM4A1_mobile.]<br><br>[Slider blir brukt for å avgi svar. Utgangsposisjonen er satt til verdien 25.] |         |                              |
| Kommentarer                                                                                                                          | Generelt sett, i hvilken grad mener du at Norges Høyesteretts makt til å avgjøre visse typer kontroversielle saker bør                                                                                                    |         |                              |
| Verdi                                                                                                                                | Merkelapp                                                                                                                                                                                                                 | Enheter | Prosent                      |
| 0                                                                                                                                    | Ikke i det hele tatt                                                                                                                                                                                                      | 47      | <div><div></div></div> 1.0%  |
| 1                                                                                                                                    | 1                                                                                                                                                                                                                         | 9       | <div><div></div></div> 0.2%  |
| 2                                                                                                                                    | 2                                                                                                                                                                                                                         | 6       | <div><div></div></div> 0.1%  |
| 3                                                                                                                                    | 3                                                                                                                                                                                                                         | 8       | <div><div></div></div> 0.2%  |
| 4                                                                                                                                    | 4                                                                                                                                                                                                                         | 8       | <div><div></div></div> 0.2%  |
| 5                                                                                                                                    | 5                                                                                                                                                                                                                         | 3       | <div><div></div></div> 0.1%  |
| 6                                                                                                                                    | 6                                                                                                                                                                                                                         | 4       | <div><div></div></div> 0.1%  |
| 7                                                                                                                                    | 7                                                                                                                                                                                                                         | 4       | <div><div></div></div> 0.1%  |

# r7ocrecsm4a1: I hvilken grad bør Høyesteretts makt i kontroversielle saker reduseres?

| Verdi | Merkelapp   | Enheter | Prosent |
|-------|-------------|---------|---------|
| 8     | 8           | 2       | 0.0%    |
| 9     | 9           | 5       | 0.1%    |
| 10    | 10          | 5       | 0.1%    |
| 11    | 11          | 4       | 0.1%    |
| 12    | 12          | 10      | 0.2%    |
| 13    | 13          | 3       | 0.1%    |
| 14    | 14          | 2       | 0.0%    |
| 15    | 15          | 11      | 0.2%    |
| 16    | 16          | 8       | 0.2%    |
| 17    | 17          | 10      | 0.2%    |
| 18    | 18          | 5       | 0.1%    |
| 19    | 19          | 5       | 0.1%    |
| 20    | 20          | 4       | 0.1%    |
| 21    | 21          | 1       | 0.0%    |
| 22    | 22          | 3       | 0.1%    |
| 23    | 23          | 0       |         |
| 24    | 24          | 5       | 0.1%    |
| 25    | 25          | 72      | 1.5%    |
| 26    | 26          | 2       | 0.0%    |
| 27    | 27          | 3       | 0.1%    |
| 28    | 28          | 3       | 0.1%    |
| 29    | 29          | 4       | 0.1%    |
| 30    | 30          | 1       | 0.0%    |
| 31    | 31          | 4       | 0.1%    |
| 32    | 32          | 2       | 0.0%    |
| 33    | 33          | 1       | 0.0%    |
| 34    | 34          | 1       | 0.0%    |
| 35    | 35          | 1       | 0.0%    |
| 36    | 36          | 3       | 0.1%    |
| 37    | 37          | 2       | 0.0%    |
| 38    | 38          | 0       |         |
| 39    | 39          | 1       | 0.0%    |
| 40    | 40          | 1       | 0.0%    |
| 41    | 41          | 0       |         |
| 42    | 42          | 1       | 0.0%    |
| 43    | 43          | 1       | 0.0%    |
| 44    | 44          | 0       |         |
| 45    | 45          | 0       |         |
| 46    | 46          | 0       |         |
| 47    | 47          | 0       |         |
| 48    | 48          | 0       |         |
| 49    | 49          | 1       | 0.0%    |
| 50    | Fullstendig | 1       | 0.0%    |
| 97    | Ikke svart  | 0       |         |
| 98    | Ikke spurt  | 4412    | 94.1%   |

| # r7ocreasm4a1: I hvilken grad bør Høyesteretts makt i kontroversielle saker reduseres?                                              |                                                                                                                                                                                                                                        |         |         |
|--------------------------------------------------------------------------------------------------------------------------------------|----------------------------------------------------------------------------------------------------------------------------------------------------------------------------------------------------------------------------------------|---------|---------|
| Advarsel: disse tallene indikerer antall enheter (cases) i datafilen. De kan ikke tolkes som oppsummert statistikk for populasjonen. |                                                                                                                                                                                                                                        |         |         |
| # r7ocreasm4a1_mobile: I hvilken grad bør Høyesteretts makt i kontroversielle saker reduseres?                                       |                                                                                                                                                                                                                                        |         |         |
| Informasjon                                                                                                                          | [Type= diskret] [Format=numeric] [Rekkevidde= 0-50] [Missing=*]                                                                                                                                                                        |         |         |
| Statistikk [NW/ W]                                                                                                                   | [Gyldige=4689 /-] [Ugyldig=0 /-]                                                                                                                                                                                                       |         |         |
| Spørsmålstekst                                                                                                                       | Generelt sett, i hvilken grad mener du at Norges Høyesteretts makt til å avgjøre visse typer kontroversielle saker bør reduseres?                                                                                                      |         |         |
| Instruksjoner til intervjueren                                                                                                       | [Spurt hvis u=2, ran20=1 og R7OCRECSM_mobile2=1. Versjon for mobilbrukere på grunn av oppsett. PC- og nettbrettbrukere blir spurt R7OCRECSM4A1.]<br><br>[Slider blir brukt for å avgi svar. Utgangsposisjonen er satt til verdien 25.] |         |         |
| Kommentarer                                                                                                                          | Generelt sett, i hvilken grad mener du at Norges Høyesteretts makt til å avgjøre visse typer kontroversielle saker bør                                                                                                                 |         |         |
| Verdi                                                                                                                                | Merkelapp                                                                                                                                                                                                                              | Enheter | Prosent |
| 0                                                                                                                                    | Ikke i det hele tatt                                                                                                                                                                                                                   | 9       | 0.2%    |
| 1                                                                                                                                    | 1                                                                                                                                                                                                                                      | 1       | 0.0%    |
| 2                                                                                                                                    | 2                                                                                                                                                                                                                                      | 1       | 0.0%    |
| 3                                                                                                                                    | 3                                                                                                                                                                                                                                      | 0       |         |
| 4                                                                                                                                    | 4                                                                                                                                                                                                                                      | 1       | 0.0%    |
| 5                                                                                                                                    | 5                                                                                                                                                                                                                                      | 2       | 0.0%    |
| 6                                                                                                                                    | 6                                                                                                                                                                                                                                      | 2       | 0.0%    |
| 7                                                                                                                                    | 7                                                                                                                                                                                                                                      | 1       | 0.0%    |
| 8                                                                                                                                    | 8                                                                                                                                                                                                                                      | 2       | 0.0%    |
| 9                                                                                                                                    | 9                                                                                                                                                                                                                                      | 1       | 0.0%    |
| 10                                                                                                                                   | 10                                                                                                                                                                                                                                     | 4       | 0.1%    |
| 11                                                                                                                                   | 11                                                                                                                                                                                                                                     | 2       | 0.0%    |
| 12                                                                                                                                   | 12                                                                                                                                                                                                                                     | 1       | 0.0%    |
| 13                                                                                                                                   | 13                                                                                                                                                                                                                                     | 4       | 0.1%    |
| 14                                                                                                                                   | 14                                                                                                                                                                                                                                     | 0       |         |
| 15                                                                                                                                   | 15                                                                                                                                                                                                                                     | 2       | 0.0%    |
| 16                                                                                                                                   | 16                                                                                                                                                                                                                                     | 2       | 0.0%    |
| 17                                                                                                                                   | 17                                                                                                                                                                                                                                     | 1       | 0.0%    |
| 18                                                                                                                                   | 18                                                                                                                                                                                                                                     | 2       | 0.0%    |
| 19                                                                                                                                   | 19                                                                                                                                                                                                                                     | 0       |         |
| 20                                                                                                                                   | 20                                                                                                                                                                                                                                     | 2       | 0.0%    |
| 21                                                                                                                                   | 21                                                                                                                                                                                                                                     | 1       | 0.0%    |
| 22                                                                                                                                   | 22                                                                                                                                                                                                                                     | 0       |         |
| 23                                                                                                                                   | 23                                                                                                                                                                                                                                     | 0       |         |
| 24                                                                                                                                   | 24                                                                                                                                                                                                                                     | 0       |         |
| 25                                                                                                                                   | 25                                                                                                                                                                                                                                     | 37      | 0.8%    |
| 26                                                                                                                                   | 26                                                                                                                                                                                                                                     | 1       | 0.0%    |
| 27                                                                                                                                   | 27                                                                                                                                                                                                                                     | 0       |         |
| 28                                                                                                                                   | 28                                                                                                                                                                                                                                     | 0       |         |
| 29                                                                                                                                   | 29                                                                                                                                                                                                                                     | 1       | 0.0%    |
| 30                                                                                                                                   | 30                                                                                                                                                                                                                                     | 1       | 0.0%    |
| 31                                                                                                                                   | 31                                                                                                                                                                                                                                     | 0       |         |
| 32                                                                                                                                   | 32                                                                                                                                                                                                                                     | 1       | 0.0%    |
| 33                                                                                                                                   | 33                                                                                                                                                                                                                                     | 0       |         |

| # r7ocreasm4a1_mobile: I hvilken grad bør Høyesteretts makt i kontroversielle saker reduseres?                                       |                                                                                                                                                                                                                           |         |         |
|--------------------------------------------------------------------------------------------------------------------------------------|---------------------------------------------------------------------------------------------------------------------------------------------------------------------------------------------------------------------------|---------|---------|
| Verdi                                                                                                                                | Merkelapp                                                                                                                                                                                                                 | Enheter | Prosent |
| 34                                                                                                                                   | 34                                                                                                                                                                                                                        | 1       | 0.0%    |
| 35                                                                                                                                   | 35                                                                                                                                                                                                                        | 2       | 0.0%    |
| 36                                                                                                                                   | 36                                                                                                                                                                                                                        | 0       |         |
| 37                                                                                                                                   | 37                                                                                                                                                                                                                        | 1       | 0.0%    |
| 38                                                                                                                                   | 38                                                                                                                                                                                                                        | 0       |         |
| 39                                                                                                                                   | 39                                                                                                                                                                                                                        | 0       |         |
| 40                                                                                                                                   | 40                                                                                                                                                                                                                        | 0       |         |
| 41                                                                                                                                   | 41                                                                                                                                                                                                                        | 0       |         |
| 42                                                                                                                                   | 42                                                                                                                                                                                                                        | 0       |         |
| 43                                                                                                                                   | 43                                                                                                                                                                                                                        | 0       |         |
| 44                                                                                                                                   | 44                                                                                                                                                                                                                        | 0       |         |
| 45                                                                                                                                   | 45                                                                                                                                                                                                                        | 0       |         |
| 46                                                                                                                                   | 46                                                                                                                                                                                                                        | 1       | 0.0%    |
| 47                                                                                                                                   | 47                                                                                                                                                                                                                        | 0       |         |
| 48                                                                                                                                   | 48                                                                                                                                                                                                                        | 0       |         |
| 49                                                                                                                                   | 49                                                                                                                                                                                                                        | 0       |         |
| 50                                                                                                                                   | Fullstendig                                                                                                                                                                                                               | 1       | 0.0%    |
| 97                                                                                                                                   | Ikke svart                                                                                                                                                                                                                | 0       |         |
| 98                                                                                                                                   | Ikke spurt                                                                                                                                                                                                                | 4601    | 98.1%   |
| Advarsel: disse tallene indikerer antall enheter (cases) i datafilen. De kan ikke tolkes som oppsummert statistikk for populasjonen. |                                                                                                                                                                                                                           |         |         |
| # r7ocreasm4a2: I hvilken grad favoriserer Høyesterett enkelte grupper?                                                              |                                                                                                                                                                                                                           |         |         |
| Informasjon                                                                                                                          | [Type= diskret] [Format=numeric] [Rekkevidde= 0-50] [Missing=*]                                                                                                                                                           |         |         |
| Statistikk [NW/ W]                                                                                                                   | [Gyldige=4689 /-] [Ugyldig=0 /-]                                                                                                                                                                                          |         |         |
| Spørsmålstekst                                                                                                                       | I hvilken grad mener du at avgjørelsene til Norges Høyesterett favoriserer enkelte grupper mer enn andre?                                                                                                                 |         |         |
| Instruksjoner til intervjueren                                                                                                       | [Spurt hvis u=2, ran20=1 og R7OCRECSM_mobile2=0. Versjon for PC -og nettbrettbrukere. Mobilbrukere blir spurt R7OCRECSM4A2_mobile.]<br><br>[Slider blir brukt for å avgi svar. Utgangsposisjonen er satt til verdien 25.] |         |         |
| Kommentarer                                                                                                                          | I hvilken grad mener du at avgjørelsene til Norges Høyesterett favoriserer enkelte grupper mer enn andre? ^f('R7OCRECS                                                                                                    |         |         |
| Verdi                                                                                                                                | Merkelapp                                                                                                                                                                                                                 | Enheter | Prosent |
| 0                                                                                                                                    | Ikke i det hele tatt                                                                                                                                                                                                      | 37      | 0.8%    |
| 1                                                                                                                                    | 1                                                                                                                                                                                                                         | 8       | 0.2%    |
| 2                                                                                                                                    | 2                                                                                                                                                                                                                         | 5       | 0.1%    |
| 3                                                                                                                                    | 3                                                                                                                                                                                                                         | 6       | 0.1%    |
| 4                                                                                                                                    | 4                                                                                                                                                                                                                         | 9       | 0.2%    |
| 5                                                                                                                                    | 5                                                                                                                                                                                                                         | 12      | 0.3%    |
| 6                                                                                                                                    | 6                                                                                                                                                                                                                         | 7       | 0.1%    |
| 7                                                                                                                                    | 7                                                                                                                                                                                                                         | 6       | 0.1%    |
| 8                                                                                                                                    | 8                                                                                                                                                                                                                         | 7       | 0.1%    |
| 9                                                                                                                                    | 9                                                                                                                                                                                                                         | 4       | 0.1%    |
| 10                                                                                                                                   | 10                                                                                                                                                                                                                        | 6       | 0.1%    |
| 11                                                                                                                                   | 11                                                                                                                                                                                                                        | 7       | 0.1%    |
| 12                                                                                                                                   | 12                                                                                                                                                                                                                        | 5       | 0.1%    |
| 13                                                                                                                                   | 13                                                                                                                                                                                                                        | 2       | 0.0%    |
| 14                                                                                                                                   | 14                                                                                                                                                                                                                        | 2       | 0.0%    |



| # r7ocreasm4a2: I hvilken grad favoriserer Høyesterett enkelte grupper?                                                              |                                                                                                                                                  |         |         |
|--------------------------------------------------------------------------------------------------------------------------------------|--------------------------------------------------------------------------------------------------------------------------------------------------|---------|---------|
| Verdi                                                                                                                                | Merkelapp                                                                                                                                        | Enheter | Prosent |
| 15                                                                                                                                   | 15                                                                                                                                               | 5       | 0.1%    |
| 16                                                                                                                                   | 16                                                                                                                                               | 4       | 0.1%    |
| 17                                                                                                                                   | 17                                                                                                                                               | 7       | 0.1%    |
| 18                                                                                                                                   | 18                                                                                                                                               | 6       | 0.1%    |
| 19                                                                                                                                   | 19                                                                                                                                               | 0       |         |
| 20                                                                                                                                   | 20                                                                                                                                               | 1       | 0.0%    |
| 21                                                                                                                                   | 21                                                                                                                                               | 2       | 0.0%    |
| 22                                                                                                                                   | 22                                                                                                                                               | 1       | 0.0%    |
| 23                                                                                                                                   | 23                                                                                                                                               | 1       | 0.0%    |
| 24                                                                                                                                   | 24                                                                                                                                               | 4       | 0.1%    |
| 25                                                                                                                                   | 25                                                                                                                                               | 87      | 1.9%    |
| 26                                                                                                                                   | 26                                                                                                                                               | 0       |         |
| 27                                                                                                                                   | 27                                                                                                                                               | 3       | 0.1%    |
| 28                                                                                                                                   | 28                                                                                                                                               | 3       | 0.1%    |
| 29                                                                                                                                   | 29                                                                                                                                               | 2       | 0.0%    |
| 30                                                                                                                                   | 30                                                                                                                                               | 7       | 0.1%    |
| 31                                                                                                                                   | 31                                                                                                                                               | 3       | 0.1%    |
| 32                                                                                                                                   | 32                                                                                                                                               | 3       | 0.1%    |
| 33                                                                                                                                   | 33                                                                                                                                               | 1       | 0.0%    |
| 34                                                                                                                                   | 34                                                                                                                                               | 3       | 0.1%    |
| 35                                                                                                                                   | 35                                                                                                                                               | 3       | 0.1%    |
| 36                                                                                                                                   | 36                                                                                                                                               | 0       |         |
| 37                                                                                                                                   | 37                                                                                                                                               | 2       | 0.0%    |
| 38                                                                                                                                   | 38                                                                                                                                               | 2       | 0.0%    |
| 39                                                                                                                                   | 39                                                                                                                                               | 1       | 0.0%    |
| 40                                                                                                                                   | 40                                                                                                                                               | 0       |         |
| 41                                                                                                                                   | 41                                                                                                                                               | 0       |         |
| 42                                                                                                                                   | 42                                                                                                                                               | 1       | 0.0%    |
| 43                                                                                                                                   | 43                                                                                                                                               | 0       |         |
| 44                                                                                                                                   | 44                                                                                                                                               | 0       |         |
| 45                                                                                                                                   | 45                                                                                                                                               | 0       |         |
| 46                                                                                                                                   | 46                                                                                                                                               | 0       |         |
| 47                                                                                                                                   | 47                                                                                                                                               | 1       | 0.0%    |
| 48                                                                                                                                   | 48                                                                                                                                               | 0       |         |
| 49                                                                                                                                   | 49                                                                                                                                               | 0       |         |
| 50                                                                                                                                   | Fullstendig                                                                                                                                      | 1       | 0.0%    |
| 97                                                                                                                                   | Ikke svart                                                                                                                                       | 0       |         |
| 98                                                                                                                                   | Ikke spurt                                                                                                                                       | 4412    | 94.1%   |
| Advarsel: disse tallene indikerer antall enheter (cases) i datafilen. De kan ikke tolkes som oppsummert statistikk for populasjonen. |                                                                                                                                                  |         |         |
| # r7ocreasm4a2_mobile: I hvilken grad favoriserer Høyesterett enkelte grupper?                                                       |                                                                                                                                                  |         |         |
| Informasjon                                                                                                                          | [Type= diskret] [Format=numeric] [Rekkevidde= 0-50] [Missing=*]                                                                                  |         |         |
| Statistikk [NW/ W]                                                                                                                   | [Gyldige=4689 /-] [Ugyldig=0 /-]                                                                                                                 |         |         |
| Spørsmålstekst                                                                                                                       | I hvilken grad mener du at avgjørelsene til Norges Høyesterett favoriserer enkelte grupper mer enn andre?                                        |         |         |
| Instruksjoner til intervjueren                                                                                                       | [Spurt hvis u=2, ran20=1 og R7OCRECSM_mobile2=1. Versjon for mobilbrukere på grunn av oppsett. PC- og nettbrettbrukere blir spurt R7OCRECSM4A2.] |         |         |

# # r7ocreasm4a2\_mobile: I hvilken grad favoriserer Høyesterett enkelte grupper?

|                    |                                                                                                           |
|--------------------|-----------------------------------------------------------------------------------------------------------|
|                    | [Slider blir brukt for å avgi svar. Utgangsposisjonen er satt til verdien 25.]                            |
| <b>Kommentarer</b> | I hvilken grad mener du at avgjørelsene til Norges Høyesterett favoriserer enkelte grupper mer enn andre? |

| Verdi | Merkelapp            | Enheter | Prosent |
|-------|----------------------|---------|---------|
| 0     | Ikke i det hele tatt | 9       | 0.2%    |
| 1     | 1                    | 1       | 0.0%    |
| 2     | 2                    | 0       |         |
| 3     | 3                    | 3       | 0.1%    |
| 4     | 4                    | 0       |         |
| 5     | 5                    | 2       | 0.0%    |
| 6     | 6                    | 5       | 0.1%    |
| 7     | 7                    | 1       | 0.0%    |
| 8     | 8                    | 0       |         |
| 9     | 9                    | 2       | 0.0%    |
| 10    | 10                   | 2       | 0.0%    |
| 11    | 11                   | 0       |         |
| 12    | 12                   | 1       | 0.0%    |
| 13    | 13                   | 3       | 0.1%    |
| 14    | 14                   | 0       |         |
| 15    | 15                   | 1       | 0.0%    |
| 16    | 16                   | 2       | 0.0%    |
| 17    | 17                   | 0       |         |
| 18    | 18                   | 0       |         |
| 19    | 19                   | 2       | 0.0%    |
| 20    | 20                   | 0       |         |
| 21    | 21                   | 1       | 0.0%    |
| 22    | 22                   | 0       |         |
| 23    | 23                   | 0       |         |
| 24    | 24                   | 0       |         |
| 25    | 25                   | 32      | 0.7%    |
| 26    | 26                   | 1       | 0.0%    |
| 27    | 27                   | 1       | 0.0%    |
| 28    | 28                   | 0       |         |
| 29    | 29                   | 1       | 0.0%    |
| 30    | 30                   | 5       | 0.1%    |
| 31    | 31                   | 1       | 0.0%    |
| 32    | 32                   | 3       | 0.1%    |
| 33    | 33                   | 0       |         |
| 34    | 34                   | 1       | 0.0%    |
| 35    | 35                   | 0       |         |
| 36    | 36                   | 3       | 0.1%    |
| 37    | 37                   | 1       | 0.0%    |
| 38    | 38                   | 1       | 0.0%    |
| 39    | 39                   | 0       |         |
| 40    | 40                   | 0       |         |
| 41    | 41                   | 0       |         |

| # r7ocreasm4a2_mobile: I hvilken grad favoriserer Høyesterett enkelte grupper?                                                       |                                                                                                                                                                                                                           |         |         |
|--------------------------------------------------------------------------------------------------------------------------------------|---------------------------------------------------------------------------------------------------------------------------------------------------------------------------------------------------------------------------|---------|---------|
| Verdi                                                                                                                                | Merkelapp                                                                                                                                                                                                                 | Enheter | Prosent |
| 42                                                                                                                                   | 42                                                                                                                                                                                                                        | 0       |         |
| 43                                                                                                                                   | 43                                                                                                                                                                                                                        | 0       |         |
| 44                                                                                                                                   | 44                                                                                                                                                                                                                        | 1       | 0.0%    |
| 45                                                                                                                                   | 45                                                                                                                                                                                                                        | 0       |         |
| 46                                                                                                                                   | 46                                                                                                                                                                                                                        | 0       |         |
| 47                                                                                                                                   | 47                                                                                                                                                                                                                        | 0       |         |
| 48                                                                                                                                   | 48                                                                                                                                                                                                                        | 0       |         |
| 49                                                                                                                                   | 49                                                                                                                                                                                                                        | 0       |         |
| 50                                                                                                                                   | Fullstendig                                                                                                                                                                                                               | 2       | 0.0%    |
| 97                                                                                                                                   | Ikke svart                                                                                                                                                                                                                | 0       |         |
| 98                                                                                                                                   | Ikke spurt                                                                                                                                                                                                                | 4601    | 98.1%   |
| Advarsel: disse tallene indikerer antall enheter (cases) i datafilen. De kan ikke tolkes som oppsummert statistikk for populasjonen. |                                                                                                                                                                                                                           |         |         |
| # r7ocreasm4a3: I hvilken grad kan domstolen avskaffes, dersom Høyesterett tar mange valg folk er uenige i?                          |                                                                                                                                                                                                                           |         |         |
| Informasjon                                                                                                                          | [Type= diskret] [Format=numeric] [Rekkevidde= 0-50] [Missing=*]                                                                                                                                                           |         |         |
| Statistikk [NW/ W]                                                                                                                   | [Gyldige=4689 /-] [Ugyldig=0 /-]                                                                                                                                                                                          |         |         |
| Spørsmålstekst                                                                                                                       | Og i hvilken grad mener du at dersom Norges Høyesterett begynner å ta mange avgjørelser som folk flest er uenige i, kan det være like greit å avskaffe domstolen fullstendig?                                             |         |         |
| Instruksjoner til intervjueren                                                                                                       | [Spurt hvis u=2, ran20=1 og R7OCRECSM_mobile2=0. Versjon for PC -og nettbrettbrukere. Mobilbrukere blir spurt R7OCRECSM4A3_mobile.]<br><br>[Slider blir brukt for å avgi svar. Utgangsposisjonen er satt til verdien 25.] |         |         |
| Kommentarer                                                                                                                          | Og i hvilken grad mener du at dersom Norges Høyesterett begynner å ta mange avgjørelser som folk flest er uenige i, ka                                                                                                    |         |         |
| Verdi                                                                                                                                | Merkelapp                                                                                                                                                                                                                 | Enheter | Prosent |
| 0                                                                                                                                    | Ikke i det hele tatt                                                                                                                                                                                                      | 64      | 1.4%    |
| 1                                                                                                                                    | 1                                                                                                                                                                                                                         | 11      | 0.2%    |
| 2                                                                                                                                    | 2                                                                                                                                                                                                                         | 7       | 0.1%    |
| 3                                                                                                                                    | 3                                                                                                                                                                                                                         | 7       | 0.1%    |
| 4                                                                                                                                    | 4                                                                                                                                                                                                                         | 6       | 0.1%    |
| 5                                                                                                                                    | 5                                                                                                                                                                                                                         | 7       | 0.1%    |
| 6                                                                                                                                    | 6                                                                                                                                                                                                                         | 8       | 0.2%    |
| 7                                                                                                                                    | 7                                                                                                                                                                                                                         | 5       | 0.1%    |
| 8                                                                                                                                    | 8                                                                                                                                                                                                                         | 4       | 0.1%    |
| 9                                                                                                                                    | 9                                                                                                                                                                                                                         | 8       | 0.2%    |
| 10                                                                                                                                   | 10                                                                                                                                                                                                                        | 7       | 0.1%    |
| 11                                                                                                                                   | 11                                                                                                                                                                                                                        | 4       | 0.1%    |
| 12                                                                                                                                   | 12                                                                                                                                                                                                                        | 6       | 0.1%    |
| 13                                                                                                                                   | 13                                                                                                                                                                                                                        | 3       | 0.1%    |
| 14                                                                                                                                   | 14                                                                                                                                                                                                                        | 4       | 0.1%    |
| 15                                                                                                                                   | 15                                                                                                                                                                                                                        | 6       | 0.1%    |
| 16                                                                                                                                   | 16                                                                                                                                                                                                                        | 5       | 0.1%    |
| 17                                                                                                                                   | 17                                                                                                                                                                                                                        | 2       | 0.0%    |
| 18                                                                                                                                   | 18                                                                                                                                                                                                                        | 4       | 0.1%    |
| 19                                                                                                                                   | 19                                                                                                                                                                                                                        | 2       | 0.0%    |
| 20                                                                                                                                   | 20                                                                                                                                                                                                                        | 3       | 0.1%    |
| 21                                                                                                                                   | 21                                                                                                                                                                                                                        | 1       | 0.0%    |

### # r7ocreasm4a3: I hvilken grad kan domstolen avskaffes, dersom Høyesterett tar mange valg folk er uenige i?

| Verdi | Merkelapp   | Enheter | Prosent |
|-------|-------------|---------|---------|
| 22    | 22          | 1       | 0.0%    |
| 23    | 23          | 1       | 0.0%    |
| 24    | 24          | 2       | 0.0%    |
| 25    | 25          | 60      | 1.3%    |
| 26    | 26          | 0       |         |
| 27    | 27          | 3       | 0.1%    |
| 28    | 28          | 1       | 0.0%    |
| 29    | 29          | 5       | 0.1%    |
| 30    | 30          | 4       | 0.1%    |
| 31    | 31          | 6       | 0.1%    |
| 32    | 32          | 2       | 0.0%    |
| 33    | 33          | 0       |         |
| 34    | 34          | 1       | 0.0%    |
| 35    | 35          | 2       | 0.0%    |
| 36    | 36          | 4       | 0.1%    |
| 37    | 37          | 2       | 0.0%    |
| 38    | 38          | 2       | 0.0%    |
| 39    | 39          | 0       |         |
| 40    | 40          | 1       | 0.0%    |
| 41    | 41          | 1       | 0.0%    |
| 42    | 42          | 0       |         |
| 43    | 43          | 1       | 0.0%    |
| 44    | 44          | 0       |         |
| 45    | 45          | 0       |         |
| 46    | 46          | 2       | 0.0%    |
| 47    | 47          | 0       |         |
| 48    | 48          | 0       |         |
| 49    | 49          | 0       |         |
| 50    | Fullstendig | 2       | 0.0%    |
| 97    | Ikke svart  | 0       |         |
| 98    | Ikke spurt  | 4412    | 94.1%   |

Advarsel: disse tallene indikerer antall enheter (cases) i datafilen. De kan ikke tolkes som oppsummert statistikk for populasjonen.

### # r7ocreasm4a3\_mobile: I hvilken grad kan domstolen avskaffes, dersom Høyesterett tar mange valg folk er uenige i?

| <b>Informasjon</b>                    | [Type= diskret] [Format=numeric] [Rekkevidde= 0-50] [Missing=*]                                                                                                                                                                        |         |         |
|---------------------------------------|----------------------------------------------------------------------------------------------------------------------------------------------------------------------------------------------------------------------------------------|---------|---------|
| <b>Statistikk [NW/ W]</b>             | [Gyldige=4689 /-] [Ugyldig=0 /-]                                                                                                                                                                                                       |         |         |
| <b>Spørsmålstekst</b>                 | Og i hvilken grad mener du at dersom Norges Høyesterett begynner å ta mange avgjørelser som folk flest er uenige i, kan det være like greit å avskaffe domstolen fullstendig?                                                          |         |         |
| <b>Instruksjoner til intervjueren</b> | [Spurt hvis u=2, ran20=1 og R7OCRECSM_mobile2=1. Versjon for mobilbrukere på grunn av oppsett. PC- og nettbrettbrukere blir spurt R7OCRECSM4A3.]<br><br>[Slider blir brukt for å avgi svar. Utgangsposisjonen er satt til verdien 25.] |         |         |
| <b>Kommentarer</b>                    | Og i hvilken grad mener du at dersom Norges Høyesterett begynner å ta mange avgjørelser som folk flest er uenige i, ka                                                                                                                 |         |         |
| Verdi                                 | Merkelapp                                                                                                                                                                                                                              | Enheter | Prosent |
| 0                                     | Ikke i det hele tatt                                                                                                                                                                                                                   | 15      | 0.3%    |
| 1                                     | 1                                                                                                                                                                                                                                      | 2       | 0.0%    |

# r7ocrecsm4a3\_mobile: I hvilken grad kan domstolen avskaffes, dersom Høyesterett tar mange valg folk er uenige i?

| Verdi | Merkelapp | Enheter | Prosent |
|-------|-----------|---------|---------|
| 2     | 2         | 0       |         |
| 3     | 3         | 1       | 0.0%    |
| 4     | 4         | 2       | 0.0%    |
| 5     | 5         | 1       | 0.0%    |
| 6     | 6         | 2       | 0.0%    |
| 7     | 7         | 1       | 0.0%    |
| 8     | 8         | 1       | 0.0%    |
| 9     | 9         | 2       | 0.0%    |
| 10    | 10        | 3       | 0.1%    |
| 11    | 11        | 1       | 0.0%    |
| 12    | 12        | 2       | 0.0%    |
| 13    | 13        | 0       |         |
| 14    | 14        | 2       | 0.0%    |
| 15    | 15        | 3       | 0.1%    |
| 16    | 16        | 2       | 0.0%    |
| 17    | 17        | 2       | 0.0%    |
| 18    | 18        | 0       |         |
| 19    | 19        | 1       | 0.0%    |
| 20    | 20        | 1       | 0.0%    |
| 21    | 21        | 1       | 0.0%    |
| 22    | 22        | 1       | 0.0%    |
| 23    | 23        | 0       |         |
| 24    | 24        | 0       |         |
| 25    | 25        | 26      | 0.6%    |
| 26    | 26        | 0       |         |
| 27    | 27        | 1       | 0.0%    |
| 28    | 28        | 1       | 0.0%    |
| 29    | 29        | 2       | 0.0%    |
| 30    | 30        | 0       |         |
| 31    | 31        | 2       | 0.0%    |
| 32    | 32        | 0       |         |
| 33    | 33        | 0       |         |
| 34    | 34        | 1       | 0.0%    |
| 35    | 35        | 0       |         |
| 36    | 36        | 0       |         |
| 37    | 37        | 0       |         |
| 38    | 38        | 2       | 0.0%    |
| 39    | 39        | 1       | 0.0%    |
| 40    | 40        | 0       |         |
| 41    | 41        | 0       |         |
| 42    | 42        | 0       |         |
| 43    | 43        | 3       | 0.1%    |
| 44    | 44        | 0       |         |
| 45    | 45        | 0       |         |
| 46    | 46        | 0       |         |

### # r7ocreasm4a3\_mobile: I hvilken grad kan domstolen avskaffes, dersom Høyesterett tar mange valg folk er uenige i?

| Verdi | Merkelapp   | Enheter | Prosent |
|-------|-------------|---------|---------|
| 47    | 47          | 2       | 0.0%    |
| 48    | 48          | 0       |         |
| 49    | 49          | 0       |         |
| 50    | Fullstendig | 1       | 0.0%    |
| 97    | Ikke svart  | 0       |         |
| 98    | Ikke spurt  | 4601    | 98.1%   |

Advarsel: disse tallene indikerer antall enheter (cases) i datafilen. De kan ikke tolkes som oppsummert statistikk for populasjonen.

### # r7ocreasm4b1: I hvilken grad bør Høyesteretts makt i kontroversielle saker reduseres?

|                                       |                                                                                                                                                                                                                          |
|---------------------------------------|--------------------------------------------------------------------------------------------------------------------------------------------------------------------------------------------------------------------------|
| <b>Informasjon</b>                    | [Type= diskret] [Format=numeric] [Rekkevidde= 0-50] [Missing=*]                                                                                                                                                          |
| <b>Statistikk [NW/ W]</b>             | [Gyldige=4689 /-] [Ugyldig=0 /-]                                                                                                                                                                                         |
| <b>Spørsmålstekst</b>                 | Generelt sett, i hvilken grad mener du at Norges Høyesteretts makt til å avgjøre visse typer kontroversielle saker bør reduseres?                                                                                        |
| <b>Instruksjoner til intervjueren</b> | [Spurt hvis u=2, ran20=2 og R7OCRECSM_mobile2=0. Versjon for PC -og nettbrettbrukere. Mobilbrukere blir spurt R7OCRECSM4B1_mobile.]<br><br>[Slider blir brukt for å avgi svar. Utgangsposisjonen er satt til verdien 1.] |
| <b>Kommentarer</b>                    | Generelt sett, i hvilken grad mener du at Norges Høyesteretts makt til å avgjøre visse typer kontroversielle saker bør                                                                                                   |

| Verdi | Merkelapp            | Enheter | Prosent |
|-------|----------------------|---------|---------|
| 0     | Ikke i det hele tatt | 16      | 0.3%    |
| 1     | 1                    | 76      | 1.6%    |
| 2     | 2                    | 4       | 0.1%    |
| 3     | 3                    | 4       | 0.1%    |
| 4     | 4                    | 6       | 0.1%    |
| 5     | 5                    | 5       | 0.1%    |
| 6     | 6                    | 4       | 0.1%    |
| 7     | 7                    | 8       | 0.2%    |
| 8     | 8                    | 11      | 0.2%    |
| 9     | 9                    | 5       | 0.1%    |
| 10    | 10                   | 2       | 0.0%    |
| 11    | 11                   | 8       | 0.2%    |
| 12    | 12                   | 11      | 0.2%    |
| 13    | 13                   | 4       | 0.1%    |
| 14    | 14                   | 7       | 0.1%    |
| 15    | 15                   | 6       | 0.1%    |
| 16    | 16                   | 4       | 0.1%    |
| 17    | 17                   | 2       | 0.0%    |
| 18    | 18                   | 5       | 0.1%    |
| 19    | 19                   | 3       | 0.1%    |
| 20    | 20                   | 3       | 0.1%    |
| 21    | 21                   | 4       | 0.1%    |
| 22    | 22                   | 2       | 0.0%    |
| 23    | 23                   | 4       | 0.1%    |
| 24    | 24                   | 21      | 0.4%    |
| 25    | 25                   | 38      | 0.8%    |
| 26    | 26                   | 9       | 0.2%    |

| # r7ocreasm4b1: I hvilken grad bør Høyesteretts makt i kontroversielle saker reduseres?                                              |                                                                                                                                                                                                                                       |         |         |
|--------------------------------------------------------------------------------------------------------------------------------------|---------------------------------------------------------------------------------------------------------------------------------------------------------------------------------------------------------------------------------------|---------|---------|
| Verdi                                                                                                                                | Merkelapp                                                                                                                                                                                                                             | Enheter | Prosent |
| 27                                                                                                                                   | 27                                                                                                                                                                                                                                    | 3       | 0.1%    |
| 28                                                                                                                                   | 28                                                                                                                                                                                                                                    | 5       | 0.1%    |
| 29                                                                                                                                   | 29                                                                                                                                                                                                                                    | 0       |         |
| 30                                                                                                                                   | 30                                                                                                                                                                                                                                    | 3       | 0.1%    |
| 31                                                                                                                                   | 31                                                                                                                                                                                                                                    | 0       |         |
| 32                                                                                                                                   | 32                                                                                                                                                                                                                                    | 0       |         |
| 33                                                                                                                                   | 33                                                                                                                                                                                                                                    | 4       | 0.1%    |
| 34                                                                                                                                   | 34                                                                                                                                                                                                                                    | 0       |         |
| 35                                                                                                                                   | 35                                                                                                                                                                                                                                    | 2       | 0.0%    |
| 36                                                                                                                                   | 36                                                                                                                                                                                                                                    | 1       | 0.0%    |
| 37                                                                                                                                   | 37                                                                                                                                                                                                                                    | 2       | 0.0%    |
| 38                                                                                                                                   | 38                                                                                                                                                                                                                                    | 0       |         |
| 39                                                                                                                                   | 39                                                                                                                                                                                                                                    | 1       | 0.0%    |
| 40                                                                                                                                   | 40                                                                                                                                                                                                                                    | 0       |         |
| 41                                                                                                                                   | 41                                                                                                                                                                                                                                    | 1       | 0.0%    |
| 42                                                                                                                                   | 42                                                                                                                                                                                                                                    | 0       |         |
| 43                                                                                                                                   | 43                                                                                                                                                                                                                                    | 1       | 0.0%    |
| 44                                                                                                                                   | 44                                                                                                                                                                                                                                    | 0       |         |
| 45                                                                                                                                   | 45                                                                                                                                                                                                                                    | 0       |         |
| 46                                                                                                                                   | 46                                                                                                                                                                                                                                    | 0       |         |
| 47                                                                                                                                   | 47                                                                                                                                                                                                                                    | 0       |         |
| 48                                                                                                                                   | 48                                                                                                                                                                                                                                    | 0       |         |
| 49                                                                                                                                   | 49                                                                                                                                                                                                                                    | 0       |         |
| 50                                                                                                                                   | Fullstendig                                                                                                                                                                                                                           | 1       | 0.0%    |
| 97                                                                                                                                   | Ikke svart                                                                                                                                                                                                                            | 0       |         |
| 98                                                                                                                                   | Ikke spurt                                                                                                                                                                                                                            | 4393    | 93.7%   |
| Advarsel: disse tallene indikerer antall enheter (cases) i datafilen. De kan ikke tolkes som oppsummert statistikk for populasjonen. |                                                                                                                                                                                                                                       |         |         |
| # r7ocreasm4b1_mobile: I hvilken grad bør Høyesteretts makt i kontroversielle saker reduseres?                                       |                                                                                                                                                                                                                                       |         |         |
| Informasjon                                                                                                                          | [Type= diskret] [Format=numeric] [Rekkevidde= 0-50] [Missing=*]                                                                                                                                                                       |         |         |
| Statistikk [NW/ W]                                                                                                                   | [Gyldige=4689 /-] [Ugyldig=0 /-]                                                                                                                                                                                                      |         |         |
| Spørsmålstekst                                                                                                                       | Generelt sett, i hvilken grad mener du at Norges Høyesteretts makt til å avgjøre visse typer kontroversielle saker bør reduseres?                                                                                                     |         |         |
| Instruksjoner til intervjueren                                                                                                       | [Spurt hvis u=2, ran20=2 og R7OCRECSM_mobile2=1. Versjon for mobilbrukere på grunn av oppsett. PC- og nettbrettbrukere blir spurt R7OCRECSM4B1.]<br><br>[Slider blir brukt for å avgi svar. Utgangsposisjonen er satt til verdien 1.] |         |         |
| Kommentarer                                                                                                                          | Generelt sett, i hvilken grad mener du at Norges Høyesteretts makt til å avgjøre visse typer kontroversielle saker bør reduseres?                                                                                                     |         |         |
| Verdi                                                                                                                                | Merkelapp                                                                                                                                                                                                                             | Enheter | Prosent |
| 0                                                                                                                                    | Ikke i det hele tatt                                                                                                                                                                                                                  | 1       | 0.0%    |
| 1                                                                                                                                    | 1                                                                                                                                                                                                                                     | 47      | 1.0%    |
| 2                                                                                                                                    | 2                                                                                                                                                                                                                                     | 0       |         |
| 3                                                                                                                                    | 3                                                                                                                                                                                                                                     | 1       | 0.0%    |
| 4                                                                                                                                    | 4                                                                                                                                                                                                                                     | 0       |         |
| 5                                                                                                                                    | 5                                                                                                                                                                                                                                     | 3       | 0.1%    |
| 6                                                                                                                                    | 6                                                                                                                                                                                                                                     | 1       | 0.0%    |

# r7ocrecsm4b1\_mobile: I hvilken grad bør Høyesteretts makt i kontroversielle saker reduseres?

| Verdi | Merkelapp   | Enheter | Prosent |
|-------|-------------|---------|---------|
| 7     | 7           | 1       | 0.0%    |
| 8     | 8           | 1       | 0.0%    |
| 9     | 9           | 2       | 0.0%    |
| 10    | 10          | 2       | 0.0%    |
| 11    | 11          | 1       | 0.0%    |
| 12    | 12          | 1       | 0.0%    |
| 13    | 13          | 2       | 0.0%    |
| 14    | 14          | 1       | 0.0%    |
| 15    | 15          | 0       |         |
| 16    | 16          | 1       | 0.0%    |
| 17    | 17          | 2       | 0.0%    |
| 18    | 18          | 0       |         |
| 19    | 19          | 1       | 0.0%    |
| 20    | 20          | 2       | 0.0%    |
| 21    | 21          | 3       | 0.1%    |
| 22    | 22          | 2       | 0.0%    |
| 23    | 23          | 1       | 0.0%    |
| 24    | 24          | 1       | 0.0%    |
| 25    | 25          | 1       | 0.0%    |
| 26    | 26          | 0       |         |
| 27    | 27          | 0       |         |
| 28    | 28          | 2       | 0.0%    |
| 29    | 29          | 1       | 0.0%    |
| 30    | 30          | 9       | 0.2%    |
| 31    | 31          | 3       | 0.1%    |
| 32    | 32          | 1       | 0.0%    |
| 33    | 33          | 2       | 0.0%    |
| 34    | 34          | 1       | 0.0%    |
| 35    | 35          | 1       | 0.0%    |
| 36    | 36          | 3       | 0.1%    |
| 37    | 37          | 1       | 0.0%    |
| 38    | 38          | 2       | 0.0%    |
| 39    | 39          | 0       |         |
| 40    | 40          | 1       | 0.0%    |
| 41    | 41          | 1       | 0.0%    |
| 42    | 42          | 2       | 0.0%    |
| 43    | 43          | 1       | 0.0%    |
| 44    | 44          | 0       |         |
| 45    | 45          | 0       |         |
| 46    | 46          | 0       |         |
| 47    | 47          | 0       |         |
| 48    | 48          | 0       |         |
| 49    | 49          | 0       |         |
| 50    | Fullstendig | 0       |         |
| 97    | Ikke svart  | 0       |         |



| # r7ocreasm4b1_mobile: I hvilken grad bør Høyesteretts makt i kontroversielle saker reduseres?                                       |                                                                                                                                                                                                                          |         |         |
|--------------------------------------------------------------------------------------------------------------------------------------|--------------------------------------------------------------------------------------------------------------------------------------------------------------------------------------------------------------------------|---------|---------|
| Verdi                                                                                                                                | Merkelapp                                                                                                                                                                                                                | Enheter | Prosent |
| 98                                                                                                                                   | Ikke spurt                                                                                                                                                                                                               | 4580    | 97.7%   |
| Advarsel: disse tallene indikerer antall enheter (cases) i datafilen. De kan ikke tolkes som oppsummert statistikk for populasjonen. |                                                                                                                                                                                                                          |         |         |
| # r7ocreasm4b2: I hvilken grad favoriserer Høyesterett enkelte grupper?                                                              |                                                                                                                                                                                                                          |         |         |
| Informasjon                                                                                                                          | [Type= diskret] [Format=numeric] [Rekkevidde= 0-50] [Missing=*]                                                                                                                                                          |         |         |
| Statistikk [NW/ W]                                                                                                                   | [Gyldige=4689 /-] [Ugyldig=0 /-]                                                                                                                                                                                         |         |         |
| Spørsmålstekst                                                                                                                       | I hvilken grad mener du at avgjørelsene til Norges Høyesterett favoriserer enkelte grupper mer enn andre?                                                                                                                |         |         |
| Instruksjoner til intervjueren                                                                                                       | [Spurt hvis u=2, ran20=2 og R7OCRECSM_mobile2=0. Versjon for PC -og nettbrettbrukere. Mobilbrukere blir spurt R7OCRECSM4B2_mobile.]<br><br>[Slider blir brukt for å avgi svar. Utgangsposisjonen er satt til verdien 1.] |         |         |
| Kommentarer                                                                                                                          | I hvilken grad mener du at avgjørelsene til Norges Høyesterett favoriserer enkelte grupper mer enn andre? ^f('R7OCRECS                                                                                                   |         |         |
| Verdi                                                                                                                                | Merkelapp                                                                                                                                                                                                                | Enheter | Prosent |
| 0                                                                                                                                    | Ikke i det hele tatt                                                                                                                                                                                                     | 6       | 0.1%    |
| 1                                                                                                                                    | 1                                                                                                                                                                                                                        | 82      | 1.7%    |
| 2                                                                                                                                    | 2                                                                                                                                                                                                                        | 1       | 0.0%    |
| 3                                                                                                                                    | 3                                                                                                                                                                                                                        | 4       | 0.1%    |
| 4                                                                                                                                    | 4                                                                                                                                                                                                                        | 3       | 0.1%    |
| 5                                                                                                                                    | 5                                                                                                                                                                                                                        | 7       | 0.1%    |
| 6                                                                                                                                    | 6                                                                                                                                                                                                                        | 4       | 0.1%    |
| 7                                                                                                                                    | 7                                                                                                                                                                                                                        | 7       | 0.1%    |
| 8                                                                                                                                    | 8                                                                                                                                                                                                                        | 6       | 0.1%    |
| 9                                                                                                                                    | 9                                                                                                                                                                                                                        | 6       | 0.1%    |
| 10                                                                                                                                   | 10                                                                                                                                                                                                                       | 9       | 0.2%    |
| 11                                                                                                                                   | 11                                                                                                                                                                                                                       | 7       | 0.1%    |
| 12                                                                                                                                   | 12                                                                                                                                                                                                                       | 5       | 0.1%    |
| 13                                                                                                                                   | 13                                                                                                                                                                                                                       | 6       | 0.1%    |
| 14                                                                                                                                   | 14                                                                                                                                                                                                                       | 2       | 0.0%    |
| 15                                                                                                                                   | 15                                                                                                                                                                                                                       | 4       | 0.1%    |
| 16                                                                                                                                   | 16                                                                                                                                                                                                                       | 1       | 0.0%    |
| 17                                                                                                                                   | 17                                                                                                                                                                                                                       | 3       | 0.1%    |
| 18                                                                                                                                   | 18                                                                                                                                                                                                                       | 4       | 0.1%    |
| 19                                                                                                                                   | 19                                                                                                                                                                                                                       | 3       | 0.1%    |
| 20                                                                                                                                   | 20                                                                                                                                                                                                                       | 3       | 0.1%    |
| 21                                                                                                                                   | 21                                                                                                                                                                                                                       | 6       | 0.1%    |
| 22                                                                                                                                   | 22                                                                                                                                                                                                                       | 3       | 0.1%    |
| 23                                                                                                                                   | 23                                                                                                                                                                                                                       | 3       | 0.1%    |
| 24                                                                                                                                   | 24                                                                                                                                                                                                                       | 16      | 0.3%    |
| 25                                                                                                                                   | 25                                                                                                                                                                                                                       | 40      | 0.9%    |
| 26                                                                                                                                   | 26                                                                                                                                                                                                                       | 8       | 0.2%    |
| 27                                                                                                                                   | 27                                                                                                                                                                                                                       | 8       | 0.2%    |
| 28                                                                                                                                   | 28                                                                                                                                                                                                                       | 5       | 0.1%    |
| 29                                                                                                                                   | 29                                                                                                                                                                                                                       | 7       | 0.1%    |
| 30                                                                                                                                   | 30                                                                                                                                                                                                                       | 3       | 0.1%    |
| 31                                                                                                                                   | 31                                                                                                                                                                                                                       | 7       | 0.1%    |
| 32                                                                                                                                   | 32                                                                                                                                                                                                                       | 2       | 0.0%    |

| # r7ocreasm4b2: I hvilken grad favoriserer Høyesterett enkelte grupper?                                                              |                                                                                                                                                                                                                                       |         |         |
|--------------------------------------------------------------------------------------------------------------------------------------|---------------------------------------------------------------------------------------------------------------------------------------------------------------------------------------------------------------------------------------|---------|---------|
| Verdi                                                                                                                                | Merkelapp                                                                                                                                                                                                                             | Enheter | Prosent |
| 33                                                                                                                                   | 33                                                                                                                                                                                                                                    | 4       | 0.1%    |
| 34                                                                                                                                   | 34                                                                                                                                                                                                                                    | 3       | 0.1%    |
| 35                                                                                                                                   | 35                                                                                                                                                                                                                                    | 0       |         |
| 36                                                                                                                                   | 36                                                                                                                                                                                                                                    | 1       | 0.0%    |
| 37                                                                                                                                   | 37                                                                                                                                                                                                                                    | 3       | 0.1%    |
| 38                                                                                                                                   | 38                                                                                                                                                                                                                                    | 1       | 0.0%    |
| 39                                                                                                                                   | 39                                                                                                                                                                                                                                    | 2       | 0.0%    |
| 40                                                                                                                                   | 40                                                                                                                                                                                                                                    | 0       |         |
| 41                                                                                                                                   | 41                                                                                                                                                                                                                                    | 0       |         |
| 42                                                                                                                                   | 42                                                                                                                                                                                                                                    | 0       |         |
| 43                                                                                                                                   | 43                                                                                                                                                                                                                                    | 0       |         |
| 44                                                                                                                                   | 44                                                                                                                                                                                                                                    | 0       |         |
| 45                                                                                                                                   | 45                                                                                                                                                                                                                                    | 0       |         |
| 46                                                                                                                                   | 46                                                                                                                                                                                                                                    | 0       |         |
| 47                                                                                                                                   | 47                                                                                                                                                                                                                                    | 0       |         |
| 48                                                                                                                                   | 48                                                                                                                                                                                                                                    | 0       |         |
| 49                                                                                                                                   | 49                                                                                                                                                                                                                                    | 0       |         |
| 50                                                                                                                                   | Fullstendig                                                                                                                                                                                                                           | 2       | 0.0%    |
| 97                                                                                                                                   | Ikke svart                                                                                                                                                                                                                            | 0       |         |
| 98                                                                                                                                   | Ikke spurt                                                                                                                                                                                                                            | 4392    | 93.7%   |
| Advarsel: disse tallene indikerer antall enheter (cases) i datafilen. De kan ikke tolkes som oppsummert statistikk for populasjonen. |                                                                                                                                                                                                                                       |         |         |
| # r7ocreasm4b2_mobile: I hvilken grad favoriserer Høyesterett enkelte grupper?                                                       |                                                                                                                                                                                                                                       |         |         |
| Informasjon                                                                                                                          | [Type= diskret] [Format=numeric] [Rekkevidde= 0-50] [Missing=*]                                                                                                                                                                       |         |         |
| Statistikk [NW/ W]                                                                                                                   | [Gyldige=4689 /-] [Ugyldig=0 /-]                                                                                                                                                                                                      |         |         |
| Spørsmålstekst                                                                                                                       | I hvilken grad mener du at avgjørelsene til Norges Høyesterett favoriserer enkelte grupper mer enn andre?                                                                                                                             |         |         |
| Instruksjoner til intervjueren                                                                                                       | [Spurt hvis u=2, ran20=2 og R7OCRECSM_mobile2=1. Versjon for mobilbrukere på grunn av oppsett. PC- og nettbrettbrukere blir spurt R7OCRECSM4B2.]<br><br>[Slider blir brukt for å avgi svar. Utgangsposisjonen er satt til verdien 1.] |         |         |
| Kommentarer                                                                                                                          | I hvilken grad mener du at avgjørelsene til Norges Høyesterett favoriserer enkelte grupper mer enn andre?                                                                                                                             |         |         |
| Verdi                                                                                                                                | Merkelapp                                                                                                                                                                                                                             | Enheter | Prosent |
| 0                                                                                                                                    | Ikke i det hele tatt                                                                                                                                                                                                                  | 2       | 0.0%    |
| 1                                                                                                                                    | 1                                                                                                                                                                                                                                     | 39      | 0.8%    |
| 2                                                                                                                                    | 2                                                                                                                                                                                                                                     | 0       |         |
| 3                                                                                                                                    | 3                                                                                                                                                                                                                                     | 1       | 0.0%    |
| 4                                                                                                                                    | 4                                                                                                                                                                                                                                     | 0       |         |
| 5                                                                                                                                    | 5                                                                                                                                                                                                                                     | 0       |         |
| 6                                                                                                                                    | 6                                                                                                                                                                                                                                     | 2       | 0.0%    |
| 7                                                                                                                                    | 7                                                                                                                                                                                                                                     | 1       | 0.0%    |
| 8                                                                                                                                    | 8                                                                                                                                                                                                                                     | 2       | 0.0%    |
| 9                                                                                                                                    | 9                                                                                                                                                                                                                                     | 3       | 0.1%    |
| 10                                                                                                                                   | 10                                                                                                                                                                                                                                    | 0       |         |
| 11                                                                                                                                   | 11                                                                                                                                                                                                                                    | 2       | 0.0%    |
| 12                                                                                                                                   | 12                                                                                                                                                                                                                                    | 0       |         |
| 13                                                                                                                                   | 13                                                                                                                                                                                                                                    | 3       | 0.1%    |

| # r7ocreasm4b2: I hvilken grad favoriserer Høyesterett enkelte grupper?                                                              |                                                                                                                                                                               |         |         |
|--------------------------------------------------------------------------------------------------------------------------------------|-------------------------------------------------------------------------------------------------------------------------------------------------------------------------------|---------|---------|
| Verdi                                                                                                                                | Merkelapp                                                                                                                                                                     | Enheter | Prosent |
| 14                                                                                                                                   | 14                                                                                                                                                                            | 2       | 0.0%    |
| 15                                                                                                                                   | 15                                                                                                                                                                            | 1       | 0.0%    |
| 16                                                                                                                                   | 16                                                                                                                                                                            | 0       |         |
| 17                                                                                                                                   | 17                                                                                                                                                                            | 1       | 0.0%    |
| 18                                                                                                                                   | 18                                                                                                                                                                            | 2       | 0.0%    |
| 19                                                                                                                                   | 19                                                                                                                                                                            | 2       | 0.0%    |
| 20                                                                                                                                   | 20                                                                                                                                                                            | 1       | 0.0%    |
| 21                                                                                                                                   | 21                                                                                                                                                                            | 2       | 0.0%    |
| 22                                                                                                                                   | 22                                                                                                                                                                            | 4       | 0.1%    |
| 23                                                                                                                                   | 23                                                                                                                                                                            | 0       |         |
| 24                                                                                                                                   | 24                                                                                                                                                                            | 2       | 0.0%    |
| 25                                                                                                                                   | 25                                                                                                                                                                            | 2       | 0.0%    |
| 26                                                                                                                                   | 26                                                                                                                                                                            | 4       | 0.1%    |
| 27                                                                                                                                   | 27                                                                                                                                                                            | 2       | 0.0%    |
| 28                                                                                                                                   | 28                                                                                                                                                                            | 2       | 0.0%    |
| 29                                                                                                                                   | 29                                                                                                                                                                            | 2       | 0.0%    |
| 30                                                                                                                                   | 30                                                                                                                                                                            | 4       | 0.1%    |
| 31                                                                                                                                   | 31                                                                                                                                                                            | 4       | 0.1%    |
| 32                                                                                                                                   | 32                                                                                                                                                                            | 2       | 0.0%    |
| 33                                                                                                                                   | 33                                                                                                                                                                            | 2       | 0.0%    |
| 34                                                                                                                                   | 34                                                                                                                                                                            | 1       | 0.0%    |
| 35                                                                                                                                   | 35                                                                                                                                                                            | 1       | 0.0%    |
| 36                                                                                                                                   | 36                                                                                                                                                                            | 1       | 0.0%    |
| 37                                                                                                                                   | 37                                                                                                                                                                            | 0       |         |
| 38                                                                                                                                   | 38                                                                                                                                                                            | 1       | 0.0%    |
| 39                                                                                                                                   | 39                                                                                                                                                                            | 1       | 0.0%    |
| 40                                                                                                                                   | 40                                                                                                                                                                            | 0       |         |
| 41                                                                                                                                   | 41                                                                                                                                                                            | 1       | 0.0%    |
| 42                                                                                                                                   | 42                                                                                                                                                                            | 1       | 0.0%    |
| 43                                                                                                                                   | 43                                                                                                                                                                            | 0       |         |
| 44                                                                                                                                   | 44                                                                                                                                                                            | 1       | 0.0%    |
| 45                                                                                                                                   | 45                                                                                                                                                                            | 0       |         |
| 46                                                                                                                                   | 46                                                                                                                                                                            | 0       |         |
| 47                                                                                                                                   | 47                                                                                                                                                                            | 2       | 0.0%    |
| 48                                                                                                                                   | 48                                                                                                                                                                            | 1       | 0.0%    |
| 49                                                                                                                                   | 49                                                                                                                                                                            | 0       |         |
| 50                                                                                                                                   | Fullstendig                                                                                                                                                                   | 2       | 0.0%    |
| 97                                                                                                                                   | Ikke svart                                                                                                                                                                    | 0       |         |
| 98                                                                                                                                   | Ikke spurt                                                                                                                                                                    | 4580    | 97.7%   |
| Advarsel: disse tallene indikerer antall enheter (cases) i datafilen. De kan ikke tolkes som oppsummert statistikk for populasjonen. |                                                                                                                                                                               |         |         |
| # r7ocreasm4b3: I hvilken grad kan domstolen avskaffes, dersom Høyesterett tar mange valg folk er uenige i?                          |                                                                                                                                                                               |         |         |
| Informasjon                                                                                                                          | [Type= diskret] [Format=numeric] [Rekkevidde= 0-50] [Missing=*]                                                                                                               |         |         |
| Statistikk [NW/ W]                                                                                                                   | [Gyldige=4689 /-] [Ugyldig=0 /-]                                                                                                                                              |         |         |
| Spørsmålstekst                                                                                                                       | Og i hvilken grad mener du at dersom Norges Høyesterett begynner å ta mange avgjørelser som folk flest er uenige i, kan det være like greit å avskaffe domstolen fullstendig? |         |         |

| # r7ocreasm4b3: I hvilken grad kan domstolen avskaffes, dersom Høyesterett tar mange valg folk er uenige i? |                      |                                                                                                                                                                                                                          |         |
|-------------------------------------------------------------------------------------------------------------|----------------------|--------------------------------------------------------------------------------------------------------------------------------------------------------------------------------------------------------------------------|---------|
| Instruksjoner til intervjueren                                                                              |                      | [Spurt hvis u=2, ran20=2 og R7OCRECSM_mobile2=0. Versjon for PC -og nettbrettbrukere. Mobilbrukere blir spurt R7OCRECSM4B3_mobile.]<br><br>[Slider blir brukt for å avgi svar. Utgangsposisjonen er satt til verdien 1.] |         |
| Kommentarer                                                                                                 |                      | Og i hvilken grad mener du at dersom Norges Høyesterett begynner å ta mange avgjørelser som folk flest er uenige i, ka                                                                                                   |         |
| Verdi                                                                                                       | Merkelapp            | Enheter                                                                                                                                                                                                                  | Prosent |
| 0                                                                                                           | Ikke i det hele tatt | 19                                                                                                                                                                                                                       | 0.4%    |
| 1                                                                                                           | 1                    | 108                                                                                                                                                                                                                      | 2.3%    |
| 2                                                                                                           | 2                    | 2                                                                                                                                                                                                                        | 0.0%    |
| 3                                                                                                           | 3                    | 5                                                                                                                                                                                                                        | 0.1%    |
| 4                                                                                                           | 4                    | 7                                                                                                                                                                                                                        | 0.1%    |
| 5                                                                                                           | 5                    | 5                                                                                                                                                                                                                        | 0.1%    |
| 6                                                                                                           | 6                    | 3                                                                                                                                                                                                                        | 0.1%    |
| 7                                                                                                           | 7                    | 3                                                                                                                                                                                                                        | 0.1%    |
| 8                                                                                                           | 8                    | 2                                                                                                                                                                                                                        | 0.0%    |
| 9                                                                                                           | 9                    | 3                                                                                                                                                                                                                        | 0.1%    |
| 10                                                                                                          | 10                   | 3                                                                                                                                                                                                                        | 0.1%    |
| 11                                                                                                          | 11                   | 5                                                                                                                                                                                                                        | 0.1%    |
| 12                                                                                                          | 12                   | 3                                                                                                                                                                                                                        | 0.1%    |
| 13                                                                                                          | 13                   | 5                                                                                                                                                                                                                        | 0.1%    |
| 14                                                                                                          | 14                   | 4                                                                                                                                                                                                                        | 0.1%    |
| 15                                                                                                          | 15                   | 2                                                                                                                                                                                                                        | 0.0%    |
| 16                                                                                                          | 16                   | 1                                                                                                                                                                                                                        | 0.0%    |
| 17                                                                                                          | 17                   | 6                                                                                                                                                                                                                        | 0.1%    |
| 18                                                                                                          | 18                   | 4                                                                                                                                                                                                                        | 0.1%    |
| 19                                                                                                          | 19                   | 3                                                                                                                                                                                                                        | 0.1%    |
| 20                                                                                                          | 20                   | 5                                                                                                                                                                                                                        | 0.1%    |
| 21                                                                                                          | 21                   | 3                                                                                                                                                                                                                        | 0.1%    |
| 22                                                                                                          | 22                   | 4                                                                                                                                                                                                                        | 0.1%    |
| 23                                                                                                          | 23                   | 2                                                                                                                                                                                                                        | 0.0%    |
| 24                                                                                                          | 24                   | 15                                                                                                                                                                                                                       | 0.3%    |
| 25                                                                                                          | 25                   | 24                                                                                                                                                                                                                       | 0.5%    |
| 26                                                                                                          | 26                   | 5                                                                                                                                                                                                                        | 0.1%    |
| 27                                                                                                          | 27                   | 5                                                                                                                                                                                                                        | 0.1%    |
| 28                                                                                                          | 28                   | 3                                                                                                                                                                                                                        | 0.1%    |
| 29                                                                                                          | 29                   | 2                                                                                                                                                                                                                        | 0.0%    |
| 30                                                                                                          | 30                   | 4                                                                                                                                                                                                                        | 0.1%    |
| 31                                                                                                          | 31                   | 5                                                                                                                                                                                                                        | 0.1%    |
| 32                                                                                                          | 32                   | 3                                                                                                                                                                                                                        | 0.1%    |
| 33                                                                                                          | 33                   | 1                                                                                                                                                                                                                        | 0.0%    |
| 34                                                                                                          | 34                   | 3                                                                                                                                                                                                                        | 0.1%    |
| 35                                                                                                          | 35                   | 4                                                                                                                                                                                                                        | 0.1%    |
| 36                                                                                                          | 36                   | 4                                                                                                                                                                                                                        | 0.1%    |
| 37                                                                                                          | 37                   | 2                                                                                                                                                                                                                        | 0.0%    |
| 38                                                                                                          | 38                   | 1                                                                                                                                                                                                                        | 0.0%    |
| 39                                                                                                          | 39                   | 1                                                                                                                                                                                                                        | 0.0%    |

### # r7ocreasm4b3: I hvilken grad kan domstolen avskaffes, dersom Høyesterett tar mange valg folk er uenige i?

| Verdi | Merkelapp   | Enheter | Prosent |
|-------|-------------|---------|---------|
| 40    | 40          | 0       |         |
| 41    | 41          | 1       | 0.0%    |
| 42    | 42          | 1       | 0.0%    |
| 43    | 43          | 0       |         |
| 44    | 44          | 2       | 0.0%    |
| 45    | 45          | 0       |         |
| 46    | 46          | 0       |         |
| 47    | 47          | 0       |         |
| 48    | 48          | 1       | 0.0%    |
| 49    | 49          | 1       | 0.0%    |
| 50    | Fullstendig | 2       | 0.0%    |
| 97    | Ikke svart  | 0       |         |
| 98    | Ikke spurt  | 4392    | 93.7%   |

Advarsel: disse tallene indikerer antall enheter (cases) i datafilen. De kan ikke tolkes som oppsummert statistikk for populasjonen.

### # r7ocreasm4b3\_mobile: I hvilken grad kan domstolen avskaffes, dersom Høyesterett tar mange valg folk er uenige i?

|                                       |                                                                                                                                                                                                                                       |
|---------------------------------------|---------------------------------------------------------------------------------------------------------------------------------------------------------------------------------------------------------------------------------------|
| <b>Informasjon</b>                    | [Type= diskret] [Format=numeric] [Rekkevidde= 0-50] [Missing=*]                                                                                                                                                                       |
| <b>Statistikk [NW/ W]</b>             | [Gyldige=4689 /-] [Ugyldig=0 /-]                                                                                                                                                                                                      |
| <b>Spørsmålstekst</b>                 | Og i hvilken grad mener du at dersom Norges Høyesterett begynner å ta mange avgjørelser som folk flest er uenige i, kan det være like greit å avskaffe domstolen fullstendig?                                                         |
| <b>Instruksjoner til intervjueren</b> | [Spurt hvis u=2, ran20=2 og R7OCRECSM_mobile2=1. Versjon for mobilbrukere på grunn av oppsett. PC- og nettbrettbrukere blir spurt R7OCRECSM4B3.]<br><br>[Slider blir brukt for å avgi svar. Utgangsposisjonen er satt til verdien 1.] |
| <b>Kommentarer</b>                    | Og i hvilken grad mener du at dersom Norges Høyesterett begynner å ta mange avgjørelser som folk flest er uenige i, ka                                                                                                                |

| Verdi | Merkelapp            | Enheter | Prosent |
|-------|----------------------|---------|---------|
| 0     | Ikke i det hele tatt | 7       | 0.1%    |
| 1     | 1                    | 41      | 0.9%    |
| 2     | 2                    | 0       |         |
| 3     | 3                    | 1       | 0.0%    |
| 4     | 4                    | 1       | 0.0%    |
| 5     | 5                    | 1       | 0.0%    |
| 6     | 6                    | 1       | 0.0%    |
| 7     | 7                    | 1       | 0.0%    |
| 8     | 8                    | 1       | 0.0%    |
| 9     | 9                    | 4       | 0.1%    |
| 10    | 10                   | 6       | 0.1%    |
| 11    | 11                   | 0       |         |
| 12    | 12                   | 1       | 0.0%    |
| 13    | 13                   | 2       | 0.0%    |
| 14    | 14                   | 4       | 0.1%    |
| 15    | 15                   | 1       | 0.0%    |
| 16    | 16                   | 0       |         |
| 17    | 17                   | 1       | 0.0%    |
| 18    | 18                   | 1       | 0.0%    |
| 19    | 19                   | 2       | 0.0%    |

# # r7ocreasm4b3\_mobile: I hvilken grad kan domstolen avskaffes, dersom Høyesterett tar mange valg folk er uenige i?

| Verdi | Merkelapp   | Enheter | Prosent |
|-------|-------------|---------|---------|
| 20    | 20          | 2       | 0.0%    |
| 21    | 21          | 5       | 0.1%    |
| 22    | 22          | 1       | 0.0%    |
| 23    | 23          | 2       | 0.0%    |
| 24    | 24          | 1       | 0.0%    |
| 25    | 25          | 2       | 0.0%    |
| 26    | 26          | 2       | 0.0%    |
| 27    | 27          | 0       |         |
| 28    | 28          | 2       | 0.0%    |
| 29    | 29          | 2       | 0.0%    |
| 30    | 30          | 2       | 0.0%    |
| 31    | 31          | 1       | 0.0%    |
| 32    | 32          | 1       | 0.0%    |
| 33    | 33          | 0       |         |
| 34    | 34          | 1       | 0.0%    |
| 35    | 35          | 0       |         |
| 36    | 36          | 1       | 0.0%    |
| 37    | 37          | 1       | 0.0%    |
| 38    | 38          | 0       |         |
| 39    | 39          | 1       | 0.0%    |
| 40    | 40          | 0       |         |
| 41    | 41          | 0       |         |
| 42    | 42          | 0       |         |
| 43    | 43          | 1       | 0.0%    |
| 44    | 44          | 0       |         |
| 45    | 45          | 0       |         |
| 46    | 46          | 0       |         |
| 47    | 47          | 0       |         |
| 48    | 48          | 0       |         |
| 49    | 49          | 1       | 0.0%    |
| 50    | Fullstendig | 4       | 0.1%    |
| 97    | Ikke svart  | 0       |         |
| 98    | Ikke spurt  | 4580    | 97.7%   |

Advarsel: disse tallene indikerer antall enheter (cases) i datafilen. De kan ikke tolkes som oppsummert statistikk for populasjonen.

## # r7ocreasm4c1\_1: I hvilken grad bør Høyesteretts makt i kontroversielle saker reduseres?

|                                       |                                                                                                                                   |
|---------------------------------------|-----------------------------------------------------------------------------------------------------------------------------------|
| <b>Informasjon</b>                    | [Type= diskret] [Format=numeric] [Rekkevidde= 1-5] [Missing=*]                                                                    |
| <b>Statistikk [NW/ W]</b>             | [Gyldige=4689 /-] [Ugyldig=0 /-]                                                                                                  |
| <b>Spørsmålstekst</b>                 | Generelt sett, i hvilken grad mener du at Norges Høyesteretts makt til å avgjøre visse typer kontroversielle saker bør reduseres? |
| <b>Instruksjoner til intervjueren</b> | [Spurt hvis u=2 og ran20=3. ]                                                                                                     |
| <b>Kommentarer</b>                    | R7OCRECSM4C1_1 (Generelt sett, i hvilken grad mener du at Norges Høyesteretts makt til å avgjøre visse typer kontrover            |

| Verdi | Merkelapp            | Enheter | Prosent |
|-------|----------------------|---------|---------|
| 1     | Ikke i det hele tatt | 154     | 3.3%    |
| 2     | 2                    | 92      | 2.0%    |

| # r7ocreasm4c1_1: I hvilken grad bør Høyesteretts makt i kontroversielle saker reduseres?                                            |                                                                                                                                                                               |         |             |       |
|--------------------------------------------------------------------------------------------------------------------------------------|-------------------------------------------------------------------------------------------------------------------------------------------------------------------------------|---------|-------------|-------|
| Verdi                                                                                                                                | Merkelapp                                                                                                                                                                     | Enheter | Prosent     |       |
| 3                                                                                                                                    | 3                                                                                                                                                                             | 116     | <div></div> | 2.5%  |
| 4                                                                                                                                    | 4                                                                                                                                                                             | 19      | <div></div> | 0.4%  |
| 5                                                                                                                                    | Fullstendig                                                                                                                                                                   | 6       | <div></div> | 0.1%  |
| 97                                                                                                                                   | Ikke svart                                                                                                                                                                    | 30      | <div></div> | 0.6%  |
| 98                                                                                                                                   | Ikke spurt                                                                                                                                                                    | 4272    | <div></div> | 91.1% |
| Advarsel: disse tallene indikerer antall enheter (cases) i datafilen. De kan ikke tolkes som oppsummert statistikk for populasjonen. |                                                                                                                                                                               |         |             |       |
| # r7ocreasm4c2_1: I hvilken grad favoriserer Høyesterett enkelte grupper?                                                            |                                                                                                                                                                               |         |             |       |
| Informasjon                                                                                                                          | [Type= diskret] [Format=numeric] [Rekkevidde= 1-5] [Missing=*]                                                                                                                |         |             |       |
| Statistikk [NW/ W]                                                                                                                   | [Gyldige=4689 /-] [Ugyldig=0 /-]                                                                                                                                              |         |             |       |
| Spørsmålstekst                                                                                                                       | I hvilken grad mener du at avgjørelsene til Norges Høyesterett favoriserer enkelte grupper mer enn andre?                                                                     |         |             |       |
| Instruksjoner til intervjueren                                                                                                       | [Spurt hvis u=2 og ran20=3. ]                                                                                                                                                 |         |             |       |
| Kommentarer                                                                                                                          | R7OCRECSM4C2_1 (I hvilken grad mener du at avgjørelsene til Norges Høyesterett favoriserer enkelte grupper mer enn andr                                                       |         |             |       |
| Verdi                                                                                                                                | Merkelapp                                                                                                                                                                     | Enheter | Prosent     |       |
| 1                                                                                                                                    | Ikke i det hele tatt                                                                                                                                                          | 124     | <div></div> | 2.6%  |
| 2                                                                                                                                    | 2                                                                                                                                                                             | 107     | <div></div> | 2.3%  |
| 3                                                                                                                                    | 3                                                                                                                                                                             | 104     | <div></div> | 2.2%  |
| 4                                                                                                                                    | 4                                                                                                                                                                             | 44      | <div></div> | 0.9%  |
| 5                                                                                                                                    | Fullstendig                                                                                                                                                                   | 2       | <div></div> | 0.0%  |
| 97                                                                                                                                   | Ikke svart                                                                                                                                                                    | 36      | <div></div> | 0.8%  |
| 98                                                                                                                                   | Ikke spurt                                                                                                                                                                    | 4272    | <div></div> | 91.1% |
| Advarsel: disse tallene indikerer antall enheter (cases) i datafilen. De kan ikke tolkes som oppsummert statistikk for populasjonen. |                                                                                                                                                                               |         |             |       |
| # r7ocreasm4c3_1: I hvilken grad kan domstolen avskaffes, dersom Høyesterett tar mange valg folk er uenige i?                        |                                                                                                                                                                               |         |             |       |
| Informasjon                                                                                                                          | [Type= diskret] [Format=numeric] [Rekkevidde= 1-5] [Missing=*]                                                                                                                |         |             |       |
| Statistikk [NW/ W]                                                                                                                   | [Gyldige=4689 /-] [Ugyldig=0 /-]                                                                                                                                              |         |             |       |
| Spørsmålstekst                                                                                                                       | Og i hvilken grad mener du at dersom Norges Høyesterett begynner å ta mange avgjørelser som folk flest er uenige i, kan det være like greit å avskaffe domstolen fullstendig? |         |             |       |
| Instruksjoner til intervjueren                                                                                                       | [Spurt hvis u=2 og ran20=3. ]                                                                                                                                                 |         |             |       |
| Kommentarer                                                                                                                          | R7OCRECSM4C3_1 (Og i hvilken grad mener du at dersom Norges Høyesterett begynner å ta mange avgjørelser som folk flest                                                        |         |             |       |
| Verdi                                                                                                                                | Merkelapp                                                                                                                                                                     | Enheter | Prosent     |       |
| 1                                                                                                                                    | Ikke i det hele tatt                                                                                                                                                          | 173     | <div></div> | 3.7%  |
| 2                                                                                                                                    | 2                                                                                                                                                                             | 86      | <div></div> | 1.8%  |
| 3                                                                                                                                    | 3                                                                                                                                                                             | 84      | <div></div> | 1.8%  |
| 4                                                                                                                                    | 4                                                                                                                                                                             | 34      | <div></div> | 0.7%  |
| 5                                                                                                                                    | Fullstendig                                                                                                                                                                   | 7       | <div></div> | 0.1%  |
| 97                                                                                                                                   | Ikke svart                                                                                                                                                                    | 33      | <div></div> | 0.7%  |
| 98                                                                                                                                   | Ikke spurt                                                                                                                                                                    | 4272    | <div></div> | 91.1% |
| Advarsel: disse tallene indikerer antall enheter (cases) i datafilen. De kan ikke tolkes som oppsummert statistikk for populasjonen. |                                                                                                                                                                               |         |             |       |
| # r7ran37: [Randomiserer hvis u=1 eller u=4. ]                                                                                       |                                                                                                                                                                               |         |             |       |
| Informasjon                                                                                                                          | [Type= diskret] [Format=numeric] [Rekkevidde= 1-2] [Missing=*]                                                                                                                |         |             |       |
| Statistikk [NW/ W]                                                                                                                   | [Gyldige=2323 /-] [Ugyldig=2366 /-]                                                                                                                                           |         |             |       |

| # r7ran37: [Randomiserer hvis u=1 eller u=4. ]                                                                                       |                                                                                                                              |         |                              |
|--------------------------------------------------------------------------------------------------------------------------------------|------------------------------------------------------------------------------------------------------------------------------|---------|------------------------------|
| Instruksjoner til intervjueren                                                                                                       | [Randomiserer hvis u=1 eller u=4. ]                                                                                          |         |                              |
| Verdi                                                                                                                                | Merkelapp                                                                                                                    | Enheter | Prosent                      |
| 1                                                                                                                                    | 1                                                                                                                            | 1140    | <div><div></div></div> 49.1% |
| 2                                                                                                                                    | 2                                                                                                                            | 1183    | <div><div></div></div> 50.9% |
| Sysmiss                                                                                                                              |                                                                                                                              | 2366    |                              |
| Advarsel: disse tallene indikerer antall enheter (cases) i datafilen. De kan ikke tolkes som oppsummert statistikk for populasjonen. |                                                                                                                              |         |                              |
| # r7qreview2a_1: Tilfreds med: Spørsmålene i undersøkelsen                                                                           |                                                                                                                              |         |                              |
| Informasjon                                                                                                                          | [Type= diskret] [Format=numeric] [Rekkevidde= 1-5] [Missing=*]                                                               |         |                              |
| Statistikk [NW/ W]                                                                                                                   | [Gyldige=4689 /-] [Ugyldig=0 /-]                                                                                             |         |                              |
| Tekst før spørsmål                                                                                                                   | Vi er interessert i å vite mer om hvordan du som deltaker oppfatter undersøkelsene våre. Alt i alt, hvor tilfreds er du med: |         |                              |
| Spørsmålstekst                                                                                                                       | Spørsmålene du har svart på så langt i denne undersøkelsen?                                                                  |         |                              |
| Instruksjoner til intervjueren                                                                                                       | [Spurt hvis u=1 eller u=4, og ran37=1. ]                                                                                     |         |                              |
| Kommentarer                                                                                                                          | Spørsmålene du har svart på så langt i denne undersøkelsen? (Vi er interessert i å vite mer om hvordan du som delta          |         |                              |
| Verdi                                                                                                                                | Merkelapp                                                                                                                    | Enheter | Prosent                      |
| 1                                                                                                                                    | Svært tilfreds                                                                                                               | 82      | <div><div></div></div> 1.7%  |
| 2                                                                                                                                    | Tilfreds                                                                                                                     | 637     | <div><div></div></div> 13.6% |
| 3                                                                                                                                    | Noe tilfreds                                                                                                                 | 366     | <div><div></div></div> 7.8%  |
| 4                                                                                                                                    | Lite tilfreds                                                                                                                | 34      | <div><div></div></div> 0.7%  |
| 5                                                                                                                                    | Ikke tilfreds i det hele tatt                                                                                                | 8       | <div><div></div></div> 0.2%  |
| 97                                                                                                                                   | Ikke svart                                                                                                                   | 47      | <div><div></div></div> 1.0%  |
| 98                                                                                                                                   | Ikke spurt                                                                                                                   | 3515    | <div><div></div></div> 75.0% |
| Advarsel: disse tallene indikerer antall enheter (cases) i datafilen. De kan ikke tolkes som oppsummert statistikk for populasjonen. |                                                                                                                              |         |                              |
| # r7qreview2a_2: Tilfreds med: Deltaker i medborgerpanel                                                                             |                                                                                                                              |         |                              |
| Informasjon                                                                                                                          | [Type= diskret] [Format=numeric] [Rekkevidde= 1-5] [Missing=*]                                                               |         |                              |
| Statistikk [NW/ W]                                                                                                                   | [Gyldige=4689 /-] [Ugyldig=0 /-]                                                                                             |         |                              |
| Tekst før spørsmål                                                                                                                   | Vi er interessert i å vite mer om hvordan du som deltaker oppfatter undersøkelsene våre. Alt i alt, hvor tilfreds er du med: |         |                              |
| Spørsmålstekst                                                                                                                       | Å være deltaker i Norsk medborgerpanel.                                                                                      |         |                              |
| Instruksjoner til intervjueren                                                                                                       | [Spurt hvis u=1 eller u=4, og ran37=1. ]                                                                                     |         |                              |
| Kommentarer                                                                                                                          | Å være deltaker i Norsk medborgerpanel. (Vi er interessert i å vite mer om hvordan du som deltaker oppfatter undersøk        |         |                              |
| Verdi                                                                                                                                | Merkelapp                                                                                                                    | Enheter | Prosent                      |
| 1                                                                                                                                    | Svært tilfreds                                                                                                               | 159     | <div><div></div></div> 3.4%  |
| 2                                                                                                                                    | Tilfreds                                                                                                                     | 618     | <div><div></div></div> 13.2% |
| 3                                                                                                                                    | Noe tilfreds                                                                                                                 | 292     | <div><div></div></div> 6.2%  |
| 4                                                                                                                                    | Lite tilfreds                                                                                                                | 45      | <div><div></div></div> 1.0%  |
| 5                                                                                                                                    | Ikke tilfreds i det hele tatt                                                                                                | 9       | <div><div></div></div> 0.2%  |
| 97                                                                                                                                   | Ikke svart                                                                                                                   | 51      | <div><div></div></div> 1.1%  |
| 98                                                                                                                                   | Ikke spurt                                                                                                                   | 3515    | <div><div></div></div> 75.0% |
| Advarsel: disse tallene indikerer antall enheter (cases) i datafilen. De kan ikke tolkes som oppsummert statistikk for populasjonen. |                                                                                                                              |         |                              |
| # r7ran18: [Randomiserer hvis u=1. ]                                                                                                 |                                                                                                                              |         |                              |
| Informasjon                                                                                                                          | [Type= diskret] [Format=numeric] [Rekkevidde= 1-2] [Missing=*]                                                               |         |                              |
| Statistikk [NW/ W]                                                                                                                   | [Gyldige=1149 /-] [Ugyldig=3540 /-]                                                                                          |         |                              |



| # r7ran18: [Randomiserer hvis u=1. ]                                                                                                 |            |                                                                                                                                                                                                                                                                                                                                                                                                                                                                                                                                                                                                                                                                                                                                                                      |             |       |
|--------------------------------------------------------------------------------------------------------------------------------------|------------|----------------------------------------------------------------------------------------------------------------------------------------------------------------------------------------------------------------------------------------------------------------------------------------------------------------------------------------------------------------------------------------------------------------------------------------------------------------------------------------------------------------------------------------------------------------------------------------------------------------------------------------------------------------------------------------------------------------------------------------------------------------------|-------------|-------|
| Instruksjoner til intervjueren                                                                                                       |            | [Randomiserer hvis u=1. ]                                                                                                                                                                                                                                                                                                                                                                                                                                                                                                                                                                                                                                                                                                                                            |             |       |
| Verdi                                                                                                                                | Merkelapp  | Enheter                                                                                                                                                                                                                                                                                                                                                                                                                                                                                                                                                                                                                                                                                                                                                              | Prosent     |       |
| 1                                                                                                                                    | 1          | 591                                                                                                                                                                                                                                                                                                                                                                                                                                                                                                                                                                                                                                                                                                                                                                  | <div></div> | 51.4% |
| 2                                                                                                                                    | 2          | 558                                                                                                                                                                                                                                                                                                                                                                                                                                                                                                                                                                                                                                                                                                                                                                  | <div></div> | 48.6% |
| Sysmiss                                                                                                                              |            | 3540                                                                                                                                                                                                                                                                                                                                                                                                                                                                                                                                                                                                                                                                                                                                                                 |             |       |
| Advarsel: disse tallene indikerer antall enheter (cases) i datafilen. De kan ikke tolkes som oppsummert statistikk for populasjonen. |            |                                                                                                                                                                                                                                                                                                                                                                                                                                                                                                                                                                                                                                                                                                                                                                      |             |       |
| # r7pad4a: Bidrag til felleskasse: Tilfeldig person ekskludert                                                                       |            |                                                                                                                                                                                                                                                                                                                                                                                                                                                                                                                                                                                                                                                                                                                                                                      |             |       |
| Informasjon                                                                                                                          |            | [Type= diskret] [Format=numeric] [Rekkevidde= 1-11] [Missing=*]                                                                                                                                                                                                                                                                                                                                                                                                                                                                                                                                                                                                                                                                                                      |             |       |
| Statistikk [NW/ W]                                                                                                                   |            | [Gyldige=4689 /-] [Ugyldig=0 /-]                                                                                                                                                                                                                                                                                                                                                                                                                                                                                                                                                                                                                                                                                                                                     |             |       |
| Tekst før spørsmål                                                                                                                   |            | <p>Vi ber deg nå om å ta en beslutning hvor tre personer vil trekkes ut til å motta penger. Følgende situasjon er bakgrunnen for beslutningen du skal ta:</p> <p>Tre deltakere i Medborgerpanelet settes sammen i en gruppe. Hver person i gruppen får i utgangspunktet 1000 kroner. Hver person skal velge hvor mye av sine 1000 kroner de vil bidra med til en felleskasse for gruppen. En tilfeldig person trekkes ut til å ekskluderes fra gruppen og belønnes med 1750 kroner. De to gjenværende personenes bidrag til felleskassen økes med 50 prosent, og deles deretter likt på de to.</p> <p>Den endelige pengepremien som utbetales til deltakerne som trekkes ut til å motta penger er den enkeltes andel av felleskassen og pengene som beholdes.</p>    |             |       |
| Spørsmålstekst                                                                                                                       |            | Dersom du er en av deltakerne som trekkes ut til å motta 1000 kr, hvor mye vil du bidra med til felleskassen?                                                                                                                                                                                                                                                                                                                                                                                                                                                                                                                                                                                                                                                        |             |       |
| Instruksjoner til intervjueren                                                                                                       |            | [Spurt hvis u=1 og ran18=1. ]                                                                                                                                                                                                                                                                                                                                                                                                                                                                                                                                                                                                                                                                                                                                        |             |       |
| Kommentarer                                                                                                                          |            | Vi ber deg nå om å ta en beslutning hvor tre personer vil trekkes ut til å motta penger. Følgende situasjon er bakgru                                                                                                                                                                                                                                                                                                                                                                                                                                                                                                                                                                                                                                                |             |       |
| Verdi                                                                                                                                | Merkelapp  | Enheter                                                                                                                                                                                                                                                                                                                                                                                                                                                                                                                                                                                                                                                                                                                                                              | Prosent     |       |
| 1                                                                                                                                    | 0          | 42                                                                                                                                                                                                                                                                                                                                                                                                                                                                                                                                                                                                                                                                                                                                                                   | <div></div> | 0.9%  |
| 2                                                                                                                                    | 100        | 15                                                                                                                                                                                                                                                                                                                                                                                                                                                                                                                                                                                                                                                                                                                                                                   | <div></div> | 0.3%  |
| 3                                                                                                                                    | 200        | 33                                                                                                                                                                                                                                                                                                                                                                                                                                                                                                                                                                                                                                                                                                                                                                   | <div></div> | 0.7%  |
| 4                                                                                                                                    | 300        | 49                                                                                                                                                                                                                                                                                                                                                                                                                                                                                                                                                                                                                                                                                                                                                                   | <div></div> | 1.0%  |
| 5                                                                                                                                    | 400        | 22                                                                                                                                                                                                                                                                                                                                                                                                                                                                                                                                                                                                                                                                                                                                                                   | <div></div> | 0.5%  |
| 6                                                                                                                                    | 500        | 199                                                                                                                                                                                                                                                                                                                                                                                                                                                                                                                                                                                                                                                                                                                                                                  | <div></div> | 4.2%  |
| 7                                                                                                                                    | 600        | 17                                                                                                                                                                                                                                                                                                                                                                                                                                                                                                                                                                                                                                                                                                                                                                   | <div></div> | 0.4%  |
| 8                                                                                                                                    | 700        | 9                                                                                                                                                                                                                                                                                                                                                                                                                                                                                                                                                                                                                                                                                                                                                                    | <div></div> | 0.2%  |
| 9                                                                                                                                    | 800        | 9                                                                                                                                                                                                                                                                                                                                                                                                                                                                                                                                                                                                                                                                                                                                                                    | <div></div> | 0.2%  |
| 10                                                                                                                                   | 900        | 5                                                                                                                                                                                                                                                                                                                                                                                                                                                                                                                                                                                                                                                                                                                                                                    | <div></div> | 0.1%  |
| 11                                                                                                                                   | 1000       | 157                                                                                                                                                                                                                                                                                                                                                                                                                                                                                                                                                                                                                                                                                                                                                                  | <div></div> | 3.3%  |
| 97                                                                                                                                   | Ikke svart | 34                                                                                                                                                                                                                                                                                                                                                                                                                                                                                                                                                                                                                                                                                                                                                                   | <div></div> | 0.7%  |
| 98                                                                                                                                   | Ikke spurt | 4098                                                                                                                                                                                                                                                                                                                                                                                                                                                                                                                                                                                                                                                                                                                                                                 | <div></div> | 87.4% |
| Advarsel: disse tallene indikerer antall enheter (cases) i datafilen. De kan ikke tolkes som oppsummert statistikk for populasjonen. |            |                                                                                                                                                                                                                                                                                                                                                                                                                                                                                                                                                                                                                                                                                                                                                                      |             |       |
| # r7pad4b: Bidrag til felleskasse: Person med minst bidrag ekskludert                                                                |            |                                                                                                                                                                                                                                                                                                                                                                                                                                                                                                                                                                                                                                                                                                                                                                      |             |       |
| Informasjon                                                                                                                          |            | [Type= diskret] [Format=numeric] [Rekkevidde= 1-11] [Missing=*]                                                                                                                                                                                                                                                                                                                                                                                                                                                                                                                                                                                                                                                                                                      |             |       |
| Statistikk [NW/ W]                                                                                                                   |            | [Gyldige=4689 /-] [Ugyldig=0 /-]                                                                                                                                                                                                                                                                                                                                                                                                                                                                                                                                                                                                                                                                                                                                     |             |       |
| Tekst før spørsmål                                                                                                                   |            | <p>Vi ber deg nå om å ta en beslutning hvor tre personer vil trekkes ut til å motta penger. Følgende situasjon er bakgrunnen for beslutningen du skal ta:</p> <p>Tre deltakere i Medborgerpanelet settes sammen i en gruppe. Hver person i gruppen får i utgangspunktet 1000 kroner. Hver person skal velge hvor mye av sine 1000 kroner de vil bidra med til en felleskasse for gruppen. Personen i gruppen som bidrar med minst ekskluderes fra gruppen og belønnes med 1750 kroner. De to gjenværende personenes bidrag til felleskassen økes med 50 prosent, og deles deretter likt på de to.</p> <p>Den endelige pengepremien som utbetales til deltakerne som trekkes ut til å motta penger er den enkeltes andel av felleskassen og pengene som beholdes.</p> |             |       |
| Spørsmålstekst                                                                                                                       |            | Dersom du er en av deltakerne som trekkes ut til å motta 1000 kr, hvor mye vil du bidra med til felleskassen?                                                                                                                                                                                                                                                                                                                                                                                                                                                                                                                                                                                                                                                        |             |       |

| # r7pad4b: Bidrag til felleskasse: Person med minst bidrag ekskludert                                                                |                                                                                                                                                                                                                                                                                                                                                                                                                                                                                                                                                                                       |         |                              |
|--------------------------------------------------------------------------------------------------------------------------------------|---------------------------------------------------------------------------------------------------------------------------------------------------------------------------------------------------------------------------------------------------------------------------------------------------------------------------------------------------------------------------------------------------------------------------------------------------------------------------------------------------------------------------------------------------------------------------------------|---------|------------------------------|
| Instruksjoner til intervjueren                                                                                                       | [Spurt hvis u=1 og ran18=2. ]                                                                                                                                                                                                                                                                                                                                                                                                                                                                                                                                                         |         |                              |
| Kommentarer                                                                                                                          | Vi ber deg nå om å ta en beslutning hvor tre personer vil trekkes ut til å motta penger. Følgende situasjon er bakgru                                                                                                                                                                                                                                                                                                                                                                                                                                                                 |         |                              |
| Verdi                                                                                                                                | Merkelapp                                                                                                                                                                                                                                                                                                                                                                                                                                                                                                                                                                             | Enheter | Prosent                      |
| 1                                                                                                                                    | 0                                                                                                                                                                                                                                                                                                                                                                                                                                                                                                                                                                                     | 76      | <div><div></div></div> 1.6%  |
| 2                                                                                                                                    | 100                                                                                                                                                                                                                                                                                                                                                                                                                                                                                                                                                                                   | 16      | <div><div></div></div> 0.3%  |
| 3                                                                                                                                    | 200                                                                                                                                                                                                                                                                                                                                                                                                                                                                                                                                                                                   | 22      | <div><div></div></div> 0.5%  |
| 4                                                                                                                                    | 300                                                                                                                                                                                                                                                                                                                                                                                                                                                                                                                                                                                   | 38      | <div><div></div></div> 0.8%  |
| 5                                                                                                                                    | 400                                                                                                                                                                                                                                                                                                                                                                                                                                                                                                                                                                                   | 24      | <div><div></div></div> 0.5%  |
| 6                                                                                                                                    | 500                                                                                                                                                                                                                                                                                                                                                                                                                                                                                                                                                                                   | 161     | <div><div></div></div> 3.4%  |
| 7                                                                                                                                    | 600                                                                                                                                                                                                                                                                                                                                                                                                                                                                                                                                                                                   | 14      | <div><div></div></div> 0.3%  |
| 8                                                                                                                                    | 700                                                                                                                                                                                                                                                                                                                                                                                                                                                                                                                                                                                   | 13      | <div><div></div></div> 0.3%  |
| 9                                                                                                                                    | 800                                                                                                                                                                                                                                                                                                                                                                                                                                                                                                                                                                                   | 15      | <div><div></div></div> 0.3%  |
| 10                                                                                                                                   | 900                                                                                                                                                                                                                                                                                                                                                                                                                                                                                                                                                                                   | 7       | <div><div></div></div> 0.1%  |
| 11                                                                                                                                   | 1000                                                                                                                                                                                                                                                                                                                                                                                                                                                                                                                                                                                  | 145     | <div><div></div></div> 3.1%  |
| 97                                                                                                                                   | Ikke svart                                                                                                                                                                                                                                                                                                                                                                                                                                                                                                                                                                            | 27      | <div><div></div></div> 0.6%  |
| 98                                                                                                                                   | Ikke spurt                                                                                                                                                                                                                                                                                                                                                                                                                                                                                                                                                                            | 4131    | <div><div></div></div> 88.1% |
| Advarsel: disse tallene indikerer antall enheter (cases) i datafilen. De kan ikke tolkes som oppsummert statistikk for populasjonen. |                                                                                                                                                                                                                                                                                                                                                                                                                                                                                                                                                                                       |         |                              |
| # r7ran19: [Randomiserer hvis u=4. ]                                                                                                 |                                                                                                                                                                                                                                                                                                                                                                                                                                                                                                                                                                                       |         |                              |
| Informasjon                                                                                                                          | [Type= diskret] [Format=numeric] [Rekkevidde= 1-6] [Missing=*]                                                                                                                                                                                                                                                                                                                                                                                                                                                                                                                        |         |                              |
| Statistikk [NW/ W]                                                                                                                   | [Gyldige=1173 /-] [Ugyldig=3516 /-]                                                                                                                                                                                                                                                                                                                                                                                                                                                                                                                                                   |         |                              |
| Instruksjoner til intervjueren                                                                                                       | [Randomiserer hvis u=4. ]                                                                                                                                                                                                                                                                                                                                                                                                                                                                                                                                                             |         |                              |
| Verdi                                                                                                                                | Merkelapp                                                                                                                                                                                                                                                                                                                                                                                                                                                                                                                                                                             | Enheter | Prosent                      |
| 1                                                                                                                                    | 1                                                                                                                                                                                                                                                                                                                                                                                                                                                                                                                                                                                     | 213     | <div><div></div></div> 18.2% |
| 2                                                                                                                                    | 2                                                                                                                                                                                                                                                                                                                                                                                                                                                                                                                                                                                     | 206     | <div><div></div></div> 17.6% |
| 3                                                                                                                                    | 3                                                                                                                                                                                                                                                                                                                                                                                                                                                                                                                                                                                     | 180     | <div><div></div></div> 15.3% |
| 4                                                                                                                                    | 4                                                                                                                                                                                                                                                                                                                                                                                                                                                                                                                                                                                     | 198     | <div><div></div></div> 16.9% |
| 5                                                                                                                                    | 5                                                                                                                                                                                                                                                                                                                                                                                                                                                                                                                                                                                     | 198     | <div><div></div></div> 16.9% |
| 6                                                                                                                                    | 6                                                                                                                                                                                                                                                                                                                                                                                                                                                                                                                                                                                     | 178     | <div><div></div></div> 15.2% |
| Sysmiss                                                                                                                              |                                                                                                                                                                                                                                                                                                                                                                                                                                                                                                                                                                                       | 3516    |                              |
| Advarsel: disse tallene indikerer antall enheter (cases) i datafilen. De kan ikke tolkes som oppsummert statistikk for populasjonen. |                                                                                                                                                                                                                                                                                                                                                                                                                                                                                                                                                                                       |         |                              |
| # r7pad5a1_1: Valg mellom gul/blå boks                                                                                               |                                                                                                                                                                                                                                                                                                                                                                                                                                                                                                                                                                                       |         |                              |
| Informasjon                                                                                                                          | [Type= diskret] [Format=numeric] [Rekkevidde= 1-2] [Missing=*]                                                                                                                                                                                                                                                                                                                                                                                                                                                                                                                        |         |                              |
| Statistikk [NW/ W]                                                                                                                   | [Gyldige=4689 /-] [Ugyldig=0 /-]                                                                                                                                                                                                                                                                                                                                                                                                                                                                                                                                                      |         |                              |
| Tekst før spørsmål                                                                                                                   | <p>Vi er opptatt av å forstå hvordan folk oppfører seg i økonomiske valgsituasjoner. Vi vil derfor be deg om å ta én anonym beslutning hvor du kan trekkes til å motta penger.</p> <p>Du og en annen tilfeldig person kan velge mellom en gul eller blå boks.</p> <p>Hvis begge velger den gule boksen får dere 1000 kroner hver. Hvis du velger blå og den andre gul får du 1500 kroner og den andre får 0 kroner. Hvis begge velger blå får dere 500 kroner hver. Uansett hva den andre gjør tjener du mest på å velge blå.</p> <p>Vi trekker ut ti personer som mottar penger.</p> |         |                              |
| Spørsmålstekst                                                                                                                       | Vennligst ta en beslutning:                                                                                                                                                                                                                                                                                                                                                                                                                                                                                                                                                           |         |                              |
| Instruksjoner til intervjueren                                                                                                       | [Spurt hvis u=4 og ran19=1. ]                                                                                                                                                                                                                                                                                                                                                                                                                                                                                                                                                         |         |                              |

| # r7pad5a1_1: Valg mellom gul/blå boks                                                                                               |                                                                                                                                                                                                                                                                                                                                                                                                                                                                                                                                                                                |         |                               |
|--------------------------------------------------------------------------------------------------------------------------------------|--------------------------------------------------------------------------------------------------------------------------------------------------------------------------------------------------------------------------------------------------------------------------------------------------------------------------------------------------------------------------------------------------------------------------------------------------------------------------------------------------------------------------------------------------------------------------------|---------|-------------------------------|
| Verdi                                                                                                                                | Merkelapp                                                                                                                                                                                                                                                                                                                                                                                                                                                                                                                                                                      | Enheter | Prosent                       |
| 1                                                                                                                                    | Gul boks                                                                                                                                                                                                                                                                                                                                                                                                                                                                                                                                                                       | 122     | <div><div></div></div> 2.6%   |
| 2                                                                                                                                    | Blå boks                                                                                                                                                                                                                                                                                                                                                                                                                                                                                                                                                                       | 87      | <div><div></div></div> 1.9%   |
| 97                                                                                                                                   | Ikke svart                                                                                                                                                                                                                                                                                                                                                                                                                                                                                                                                                                     | 4       | <div><div></div></div> 0.1%   |
| 98                                                                                                                                   | Ikke spurt                                                                                                                                                                                                                                                                                                                                                                                                                                                                                                                                                                     | 4476    | <div><div></div></div> 95.5%  |
| Advarsel: disse tallene indikerer antall enheter (cases) i datafilen. De kan ikke tolkes som oppsummert statistikk for populasjonen. |                                                                                                                                                                                                                                                                                                                                                                                                                                                                                                                                                                                |         |                               |
| # r7pad5b1: Begrunn valg av gul/blå boks [anonymisert]                                                                               |                                                                                                                                                                                                                                                                                                                                                                                                                                                                                                                                                                                |         |                               |
| Informasjon                                                                                                                          | [Type= diskret] [Format=character] [Missing=*]                                                                                                                                                                                                                                                                                                                                                                                                                                                                                                                                 |         |                               |
| Statistikk [NW/ W]                                                                                                                   | [Gyldige=4689 /-] [Ugyldig=0 /-]                                                                                                                                                                                                                                                                                                                                                                                                                                                                                                                                               |         |                               |
| Tekst før spørsmål                                                                                                                   | <p>Vi er opptatt av å forstå hvordan folk oppfører seg i økonomiske valgsituasjoner. Vi vil derfor be deg om å ta én anonym beslutning hvor du kan trekkes til å motta penger.</p> <p>Du og en annen tilfeldig person kan velge mellom en gul eller blå boks.</p> <p>Hvis begge velger den gule boksen får dere 1000 kroner hver. Hvis du velger blå og den andre gul får du 1500 kroner og den andre får 0 kroner. Hvis begge velger blå får dere 500 kroner hver. Uansett hva den andre gjør tjener du mest på å velge blå. Vi trekker ut ti personer som mottar penger.</p> |         |                               |
| Spørsmålstekst                                                                                                                       | Før du tar beslutningen ønsker vi at du begrunner valget ditt.                                                                                                                                                                                                                                                                                                                                                                                                                                                                                                                 |         |                               |
| Instruksjoner til intervjueren                                                                                                       | <p>[Spurt hvis u=4 og ran19=1. ]</p> <p>[Anonymisert.]</p>                                                                                                                                                                                                                                                                                                                                                                                                                                                                                                                     |         |                               |
| Verdi                                                                                                                                | Merkelapp                                                                                                                                                                                                                                                                                                                                                                                                                                                                                                                                                                      | Enheter | Prosent                       |
|                                                                                                                                      |                                                                                                                                                                                                                                                                                                                                                                                                                                                                                                                                                                                | 4689    | <div><div></div></div> 100.0% |
| Advarsel: disse tallene indikerer antall enheter (cases) i datafilen. De kan ikke tolkes som oppsummert statistikk for populasjonen. |                                                                                                                                                                                                                                                                                                                                                                                                                                                                                                                                                                                |         |                               |
| # r7pad5b2_1: Valg mellom gul/blå boks                                                                                               |                                                                                                                                                                                                                                                                                                                                                                                                                                                                                                                                                                                |         |                               |
| Informasjon                                                                                                                          | [Type= diskret] [Format=numeric] [Rekkevidde= 1-2] [Missing=*]                                                                                                                                                                                                                                                                                                                                                                                                                                                                                                                 |         |                               |
| Statistikk [NW/ W]                                                                                                                   | [Gyldige=4689 /-] [Ugyldig=0 /-]                                                                                                                                                                                                                                                                                                                                                                                                                                                                                                                                               |         |                               |
| Spørsmålstekst                                                                                                                       | Vennligst ta en beslutning:                                                                                                                                                                                                                                                                                                                                                                                                                                                                                                                                                    |         |                               |
| Instruksjoner til intervjueren                                                                                                       | [Spurt hvis u=4 og ran19=2. ]                                                                                                                                                                                                                                                                                                                                                                                                                                                                                                                                                  |         |                               |
| Verdi                                                                                                                                | Merkelapp                                                                                                                                                                                                                                                                                                                                                                                                                                                                                                                                                                      | Enheter | Prosent                       |
| 1                                                                                                                                    | Gul boks                                                                                                                                                                                                                                                                                                                                                                                                                                                                                                                                                                       | 124     | <div><div></div></div> 2.6%   |
| 2                                                                                                                                    | Blå boks                                                                                                                                                                                                                                                                                                                                                                                                                                                                                                                                                                       | 73      | <div><div></div></div> 1.6%   |
| 97                                                                                                                                   | Ikke svart                                                                                                                                                                                                                                                                                                                                                                                                                                                                                                                                                                     | 9       | <div><div></div></div> 0.2%   |
| 98                                                                                                                                   | Ikke spurt                                                                                                                                                                                                                                                                                                                                                                                                                                                                                                                                                                     | 4483    | <div><div></div></div> 95.6%  |
| Advarsel: disse tallene indikerer antall enheter (cases) i datafilen. De kan ikke tolkes som oppsummert statistikk for populasjonen. |                                                                                                                                                                                                                                                                                                                                                                                                                                                                                                                                                                                |         |                               |
| # r7pad5c1_1: Valg mellom gul/blå boks: Den andre personen valgte gul                                                                |                                                                                                                                                                                                                                                                                                                                                                                                                                                                                                                                                                                |         |                               |
| Informasjon                                                                                                                          | [Type= diskret] [Format=numeric] [Rekkevidde= 1-2] [Missing=*]                                                                                                                                                                                                                                                                                                                                                                                                                                                                                                                 |         |                               |
| Statistikk [NW/ W]                                                                                                                   | [Gyldige=4689 /-] [Ugyldig=0 /-]                                                                                                                                                                                                                                                                                                                                                                                                                                                                                                                                               |         |                               |
| Tekst før spørsmål                                                                                                                   | <p>Vi er opptatt av å forstå hvordan folk oppfører seg i økonomiske valgsituasjoner. Vi vil derfor be deg om å ta én anonym beslutning hvor du kan trekkes til å motta penger.</p> <p>Du og en annen tilfeldig person kan velge mellom en gul eller blå boks.</p> <p>Hvis begge velger den gule boksen får dere 1000 kroner hver. Hvis du velger blå og den andre gul får du 1500 kroner og den andre får 0 kroner. Hvis begge velger blå får dere 500 kroner hver. Uansett hva den andre gjør tjener du mest på å velge blå. Vi trekker ut ti personer som mottar penger.</p> |         |                               |
| Spørsmålstekst                                                                                                                       | Den andre personen har valgt den gule boksen. Vennligst ta en beslutning:                                                                                                                                                                                                                                                                                                                                                                                                                                                                                                      |         |                               |
| Instruksjoner til intervjueren                                                                                                       | [Spurt hvis u=4 og ran19=3. ]                                                                                                                                                                                                                                                                                                                                                                                                                                                                                                                                                  |         |                               |

| # r7pad5c1_1: Valg mellom gul/blå boks: Den andre personen valgte gul                                                                |            |                                                                                                                                                                                                                                                                                                                                                                                                                                                                                                                                                                                       |                               |
|--------------------------------------------------------------------------------------------------------------------------------------|------------|---------------------------------------------------------------------------------------------------------------------------------------------------------------------------------------------------------------------------------------------------------------------------------------------------------------------------------------------------------------------------------------------------------------------------------------------------------------------------------------------------------------------------------------------------------------------------------------|-------------------------------|
| Kommentarer                                                                                                                          |            | R7PAD5C1_1 (Den andre personen har valgt den gule boksen. Vennligst ta en beslutning: )                                                                                                                                                                                                                                                                                                                                                                                                                                                                                               |                               |
| Verdi                                                                                                                                | Merkelapp  | Enheter                                                                                                                                                                                                                                                                                                                                                                                                                                                                                                                                                                               | Prosent                       |
| 1                                                                                                                                    | Gul boks   | 105                                                                                                                                                                                                                                                                                                                                                                                                                                                                                                                                                                                   | <div><div></div></div> 2.2%   |
| 2                                                                                                                                    | Blå boks   | 69                                                                                                                                                                                                                                                                                                                                                                                                                                                                                                                                                                                    | <div><div></div></div> 1.5%   |
| 97                                                                                                                                   | Ikke svart | 6                                                                                                                                                                                                                                                                                                                                                                                                                                                                                                                                                                                     | <div><div></div></div> 0.1%   |
| 98                                                                                                                                   | Ikke spurt | 4509                                                                                                                                                                                                                                                                                                                                                                                                                                                                                                                                                                                  | <div><div></div></div> 96.2%  |
| Advarsel: disse tallene indikerer antall enheter (cases) i datafilen. De kan ikke tolkes som oppsummert statistikk for populasjonen. |            |                                                                                                                                                                                                                                                                                                                                                                                                                                                                                                                                                                                       |                               |
| # r7pad5d1: Begrunn valg av gul/blå boks: Den andre personen valgte gul [anonymisert]                                                |            |                                                                                                                                                                                                                                                                                                                                                                                                                                                                                                                                                                                       |                               |
| Informasjon                                                                                                                          |            | [Type= diskret] [Format=character] [Missing=*]                                                                                                                                                                                                                                                                                                                                                                                                                                                                                                                                        |                               |
| Statistikk [NW/ W]                                                                                                                   |            | [Gyldige=4689 /-] [Ugyldig=0 /-]                                                                                                                                                                                                                                                                                                                                                                                                                                                                                                                                                      |                               |
| Tekst før spørsmål                                                                                                                   |            | <p>Vi er opptatt av å forstå hvordan folk oppfører seg i økonomiske valgsituasjoner. Vi vil derfor be deg om å ta én anonym beslutning hvor du kan trekkes til å motta penger.</p> <p>Du og en annen tilfeldig person kan velge mellom en gul eller blå boks.</p> <p>Hvis begge velger den gule boksen får dere 1000 kroner hver. Hvis du velger blå og den andre gul får du 1500 kroner og den andre får 0 kroner. Hvis begge velger blå får dere 500 kroner hver. Uansett hva den andre gjør tjener du mest på å velge blå.</p> <p>Vi trekker ut ti personer som mottar penger.</p> |                               |
| Spørsmålstekst                                                                                                                       |            | Den andre personen har valgt den gule boksen. Før du tar beslutningen ønsker vi at du begrunner valget ditt.                                                                                                                                                                                                                                                                                                                                                                                                                                                                          |                               |
| Instruksjoner til intervjueren                                                                                                       |            | <p>[Spurt hvis u=4 og ran19=4. ]</p> <p>[Anonymisert.]</p>                                                                                                                                                                                                                                                                                                                                                                                                                                                                                                                            |                               |
| Kommentarer                                                                                                                          |            | Den andre personen har valgt den gule boksen. Før du tar beslutningen ønsker vi at du begrunner valget ditt.                                                                                                                                                                                                                                                                                                                                                                                                                                                                          |                               |
| Verdi                                                                                                                                | Merkelapp  | Enheter                                                                                                                                                                                                                                                                                                                                                                                                                                                                                                                                                                               | Prosent                       |
|                                                                                                                                      |            | 4689                                                                                                                                                                                                                                                                                                                                                                                                                                                                                                                                                                                  | <div><div></div></div> 100.0% |
| Advarsel: disse tallene indikerer antall enheter (cases) i datafilen. De kan ikke tolkes som oppsummert statistikk for populasjonen. |            |                                                                                                                                                                                                                                                                                                                                                                                                                                                                                                                                                                                       |                               |
| # r7pad5d2_1: Valg mellom gul/blå boks: Den andre personen valgte gul                                                                |            |                                                                                                                                                                                                                                                                                                                                                                                                                                                                                                                                                                                       |                               |
| Informasjon                                                                                                                          |            | [Type= diskret] [Format=numeric] [Rekkevidde= 1-2] [Missing=*]                                                                                                                                                                                                                                                                                                                                                                                                                                                                                                                        |                               |
| Statistikk [NW/ W]                                                                                                                   |            | [Gyldige=4689 /-] [Ugyldig=0 /-]                                                                                                                                                                                                                                                                                                                                                                                                                                                                                                                                                      |                               |
| Spørsmålstekst                                                                                                                       |            | Vennligst ta en beslutning:                                                                                                                                                                                                                                                                                                                                                                                                                                                                                                                                                           |                               |
| Instruksjoner til intervjueren                                                                                                       |            | [Spurt hvis u=4 og ran19=4. ]                                                                                                                                                                                                                                                                                                                                                                                                                                                                                                                                                         |                               |
| Verdi                                                                                                                                | Merkelapp  | Enheter                                                                                                                                                                                                                                                                                                                                                                                                                                                                                                                                                                               | Prosent                       |
| 1                                                                                                                                    | Gul boks   | 123                                                                                                                                                                                                                                                                                                                                                                                                                                                                                                                                                                                   | <div><div></div></div> 2.6%   |
| 2                                                                                                                                    | Blå boks   | 66                                                                                                                                                                                                                                                                                                                                                                                                                                                                                                                                                                                    | <div><div></div></div> 1.4%   |
| 97                                                                                                                                   | Ikke svart | 9                                                                                                                                                                                                                                                                                                                                                                                                                                                                                                                                                                                     | <div><div></div></div> 0.2%   |
| 98                                                                                                                                   | Ikke spurt | 4491                                                                                                                                                                                                                                                                                                                                                                                                                                                                                                                                                                                  | <div><div></div></div> 95.8%  |
| Advarsel: disse tallene indikerer antall enheter (cases) i datafilen. De kan ikke tolkes som oppsummert statistikk for populasjonen. |            |                                                                                                                                                                                                                                                                                                                                                                                                                                                                                                                                                                                       |                               |
| # r7pad5e1_1: Valg mellom gul/blå boks: Den andre personen valgte blå                                                                |            |                                                                                                                                                                                                                                                                                                                                                                                                                                                                                                                                                                                       |                               |
| Informasjon                                                                                                                          |            | [Type= diskret] [Format=numeric] [Rekkevidde= 1-2] [Missing=*]                                                                                                                                                                                                                                                                                                                                                                                                                                                                                                                        |                               |
| Statistikk [NW/ W]                                                                                                                   |            | [Gyldige=4689 /-] [Ugyldig=0 /-]                                                                                                                                                                                                                                                                                                                                                                                                                                                                                                                                                      |                               |
| Tekst før spørsmål                                                                                                                   |            | <p>Vi er opptatt av å forstå hvordan folk oppfører seg i økonomiske valgsituasjoner. Vi vil derfor be deg om å ta én anonym beslutning hvor du kan trekkes til å motta penger.</p> <p>Du og en annen tilfeldig person kan velge mellom en gul eller blå boks.</p> <p>Hvis begge velger den gule boksen får dere 1000 kroner hver. Hvis du velger blå og den andre gul får du 1500 kroner og den andre får 0 kroner. Hvis begge velger blå får dere 500 kroner hver. Uansett hva den andre gjør tjener du mest på å velge blå.</p> <p>Vi trekker ut ti personer som mottar penger.</p> |                               |
| Spørsmålstekst                                                                                                                       |            | Den andre personen har valgt den blå boksen. Vennligst ta en beslutning:                                                                                                                                                                                                                                                                                                                                                                                                                                                                                                              |                               |

| # r7pad5e1_1: Valg mellom gul/blå boks: Den andre personen valgte blå                                                                |                                                                                                                                                                                                                                                                                                                                                                                                                                                                                                                                                                                |         |                    |
|--------------------------------------------------------------------------------------------------------------------------------------|--------------------------------------------------------------------------------------------------------------------------------------------------------------------------------------------------------------------------------------------------------------------------------------------------------------------------------------------------------------------------------------------------------------------------------------------------------------------------------------------------------------------------------------------------------------------------------|---------|--------------------|
| Instruksjoner til intervjueren                                                                                                       | [Spurt hvis u=4 og ran19=5. ]                                                                                                                                                                                                                                                                                                                                                                                                                                                                                                                                                  |         |                    |
| Kommentarer                                                                                                                          | R7PAD5E1_1 (Den andre personen har valgt den blå boksen. Vennligst ta en beslutning:)                                                                                                                                                                                                                                                                                                                                                                                                                                                                                          |         |                    |
| Verdi                                                                                                                                | Merkelapp                                                                                                                                                                                                                                                                                                                                                                                                                                                                                                                                                                      | Enheter | Prosent            |
| 1                                                                                                                                    | Gul boks                                                                                                                                                                                                                                                                                                                                                                                                                                                                                                                                                                       | 74      | <div></div> 1.6%   |
| 2                                                                                                                                    | Blå boks                                                                                                                                                                                                                                                                                                                                                                                                                                                                                                                                                                       | 116     | <div></div> 2.5%   |
| 97                                                                                                                                   | Ikke svart                                                                                                                                                                                                                                                                                                                                                                                                                                                                                                                                                                     | 8       | <div></div> 0.2%   |
| 98                                                                                                                                   | Ikke spurt                                                                                                                                                                                                                                                                                                                                                                                                                                                                                                                                                                     | 4491    | <div></div> 95.8%  |
| Advarsel: disse tallene indikerer antall enheter (cases) i datafilen. De kan ikke tolkes som oppsummert statistikk for populasjonen. |                                                                                                                                                                                                                                                                                                                                                                                                                                                                                                                                                                                |         |                    |
| # r7pad5f1: Begrunn valg av gul/blå boks: Den andre personen valgte blå [anonymisert]                                                |                                                                                                                                                                                                                                                                                                                                                                                                                                                                                                                                                                                |         |                    |
| Informasjon                                                                                                                          | [Type= diskret] [Format=character] [Missing=*]                                                                                                                                                                                                                                                                                                                                                                                                                                                                                                                                 |         |                    |
| Statistikk [NW/ W]                                                                                                                   | [Gyldige=4689 /-] [Ugyldig=0 /-]                                                                                                                                                                                                                                                                                                                                                                                                                                                                                                                                               |         |                    |
| Tekst før spørsmål                                                                                                                   | <p>Vi er opptatt av å forstå hvordan folk oppfører seg i økonomiske valgsituasjoner. Vi vil derfor be deg om å ta én anonym beslutning hvor du kan trekkes til å motta penger.</p> <p>Du og en annen tilfeldig person kan velge mellom en gul eller blå boks.</p> <p>Hvis begge velger den gule boksen får dere 1000 kroner hver. Hvis du velger blå og den andre gul får du 1500 kroner og den andre får 0 kroner. Hvis begge velger blå får dere 500 kroner hver. Uansett hva den andre gjør tjener du mest på å velge blå. Vi trekker ut ti personer som mottar penger.</p> |         |                    |
| Spørsmålstekst                                                                                                                       | Den andre personen har valgt den blå boksen. Før du tar beslutningen ønsker vi at du begrunner valget ditt.                                                                                                                                                                                                                                                                                                                                                                                                                                                                    |         |                    |
| Instruksjoner til intervjueren                                                                                                       | <p>[Spurt hvis u=4 og ran19=6. ]</p> <p>[Anonymisert.]</p>                                                                                                                                                                                                                                                                                                                                                                                                                                                                                                                     |         |                    |
| Kommentarer                                                                                                                          | Den andre personen har valgt den blå boksen. Før du tar beslutningen ønsker vi at du begrunner valget ditt.                                                                                                                                                                                                                                                                                                                                                                                                                                                                    |         |                    |
| Verdi                                                                                                                                | Merkelapp                                                                                                                                                                                                                                                                                                                                                                                                                                                                                                                                                                      | Enheter | Prosent            |
|                                                                                                                                      |                                                                                                                                                                                                                                                                                                                                                                                                                                                                                                                                                                                | 4689    | <div></div> 100.0% |
| Advarsel: disse tallene indikerer antall enheter (cases) i datafilen. De kan ikke tolkes som oppsummert statistikk for populasjonen. |                                                                                                                                                                                                                                                                                                                                                                                                                                                                                                                                                                                |         |                    |

| # r7pad5f2_1: Valg mellom gul/blå boks: Den andre personen valgte blå                                                                |                                                                                                                              |         |                              |
|--------------------------------------------------------------------------------------------------------------------------------------|------------------------------------------------------------------------------------------------------------------------------|---------|------------------------------|
| Informasjon                                                                                                                          | [Type= diskret] [Format=numeric] [Rekkevidde= 1-2] [Missing=*]                                                               |         |                              |
| Statistikk [NW/ W]                                                                                                                   | [Gyldige=4689 /-] [Ugyldig=0 /-]                                                                                             |         |                              |
| Spørsmålstekst                                                                                                                       | Vennligst ta en beslutning:                                                                                                  |         |                              |
| Instruksjoner til intervjueren                                                                                                       | [Spurt hvis u=4 og ran19=6. ]                                                                                                |         |                              |
| Verdi                                                                                                                                | Merkelapp                                                                                                                    | Enheter | Prosent                      |
| 1                                                                                                                                    | Gul boks                                                                                                                     | 70      | <div><div></div></div> 1.5%  |
| 2                                                                                                                                    | Blå boks                                                                                                                     | 97      | <div><div></div></div> 2.1%  |
| 97                                                                                                                                   | Ikke svart                                                                                                                   | 11      | <div><div></div></div> 0.2%  |
| 98                                                                                                                                   | Ikke spurt                                                                                                                   | 4511    | <div><div></div></div> 96.2% |
| Advarsel: disse tallene indikerer antall enheter (cases) i datafilen. De kan ikke tolkes som oppsummert statistikk for populasjonen. |                                                                                                                              |         |                              |
| # r7qreview1_1: Tilfreds med: Spørsmålene i undersøkelsen                                                                            |                                                                                                                              |         |                              |
| Informasjon                                                                                                                          | [Type= diskret] [Format=numeric] [Rekkevidde= 1-5] [Missing=*]                                                               |         |                              |
| Statistikk [NW/ W]                                                                                                                   | [Gyldige=4689 /-] [Ugyldig=0 /-]                                                                                             |         |                              |
| Tekst før spørsmål                                                                                                                   | Vi er interessert i å vite mer om hvordan du som deltaker oppfatter undersøkelsene våre. Alt i alt, hvor tilfreds er du med: |         |                              |
| Spørsmålstekst                                                                                                                       | Spørsmålene du har svart på så langt i denne undersøkelsen?                                                                  |         |                              |
| Instruksjoner til intervjueren                                                                                                       | [Alle respondenter spurt. ]                                                                                                  |         |                              |
| Kommentarer                                                                                                                          | Spørsmålene du har svart på så langt i denne undersøkelsen? (Vi er interessert i å vite mer om hvordan du som delta          |         |                              |
| Verdi                                                                                                                                | Merkelapp                                                                                                                    | Enheter | Prosent                      |
| 1                                                                                                                                    | Svært tilfreds                                                                                                               | 311     | <div><div></div></div> 6.6%  |
| 2                                                                                                                                    | Tilfreds                                                                                                                     | 2719    | <div><div></div></div> 58.0% |
| 3                                                                                                                                    | Noe tilfreds                                                                                                                 | 1304    | <div><div></div></div> 27.8% |
| 4                                                                                                                                    | Lite tilfreds                                                                                                                | 159     | <div><div></div></div> 3.4%  |
| 5                                                                                                                                    | Ikke tilfreds i det hele tatt                                                                                                | 34      | <div><div></div></div> 0.7%  |
| 97                                                                                                                                   | Ikke svart                                                                                                                   | 162     | <div><div></div></div> 3.5%  |
| 98                                                                                                                                   | Ikke spurt                                                                                                                   | 0       |                              |
| Advarsel: disse tallene indikerer antall enheter (cases) i datafilen. De kan ikke tolkes som oppsummert statistikk for populasjonen. |                                                                                                                              |         |                              |
| # r7qreview1_2: Tilfreds med: Deltaker i medborgerpanel                                                                              |                                                                                                                              |         |                              |
| Informasjon                                                                                                                          | [Type= diskret] [Format=numeric] [Rekkevidde= 1-5] [Missing=*]                                                               |         |                              |
| Statistikk [NW/ W]                                                                                                                   | [Gyldige=4689 /-] [Ugyldig=0 /-]                                                                                             |         |                              |
| Tekst før spørsmål                                                                                                                   | Vi er interessert i å vite mer om hvordan du som deltaker oppfatter undersøkelsene våre. Alt i alt, hvor tilfreds er du med: |         |                              |
| Spørsmålstekst                                                                                                                       | Å være deltaker i Norsk medborgerpanel.                                                                                      |         |                              |
| Instruksjoner til intervjueren                                                                                                       | [Alle respondenter spurt. ]                                                                                                  |         |                              |
| Kommentarer                                                                                                                          | Å være deltaker i Norsk medborgerpanel. (Vi er interessert i å vite mer om hvordan du som deltaker oppfatter undersøk        |         |                              |
| Verdi                                                                                                                                | Merkelapp                                                                                                                    | Enheter | Prosent                      |
| 1                                                                                                                                    | Svært tilfreds                                                                                                               | 664     | <div><div></div></div> 14.2% |
| 2                                                                                                                                    | Tilfreds                                                                                                                     | 2582    | <div><div></div></div> 55.1% |
| 3                                                                                                                                    | Noe tilfreds                                                                                                                 | 1020    | <div><div></div></div> 21.8% |
| 4                                                                                                                                    | Lite tilfreds                                                                                                                | 181     | <div><div></div></div> 3.9%  |
| 5                                                                                                                                    | Ikke tilfreds i det hele tatt                                                                                                | 58      | <div><div></div></div> 1.2%  |
| 97                                                                                                                                   | Ikke svart                                                                                                                   | 184     | <div><div></div></div> 3.9%  |
| 98                                                                                                                                   | Ikke spurt                                                                                                                   | 0       |                              |

| # r7qreview1_2: Tilfreds med: Deltaker i medborgerpanel                                                                              |                                              |         |                   |
|--------------------------------------------------------------------------------------------------------------------------------------|----------------------------------------------|---------|-------------------|
| Advarsel: disse tallene indikerer antall enheter (cases) i datafilen. De kan ikke tolkes som oppsummert statistikk for populasjonen. |                                              |         |                   |
| # r7municipalSize: Kommunestørrelse                                                                                                  |                                              |         |                   |
| Informasjon                                                                                                                          | [Type= diskret] [Format=numeric] [Missing=*] |         |                   |
| Statistikk [NW/ W]                                                                                                                   | [Gyldige=4689 /-] [Ugyldig=0 /-]             |         |                   |
| Verdi                                                                                                                                | Merkelapp                                    | Enheter | Prosent           |
| 1                                                                                                                                    | <10 000                                      | 818     | <div></div> 17.4% |
| 2                                                                                                                                    | 10 001 - 20 000                              | 670     | <div></div> 14.3% |
| 3                                                                                                                                    | 20 001 - 60 000                              | 1198    | <div></div> 25.5% |
| 4                                                                                                                                    | 60 000+                                      | 2003    | <div></div> 42.7% |
| Advarsel: disse tallene indikerer antall enheter (cases) i datafilen. De kan ikke tolkes som oppsummert statistikk for populasjonen. |                                              |         |                   |
| # r7P1: Kjønn                                                                                                                        |                                              |         |                   |
| Informasjon                                                                                                                          | [Type= diskret] [Format=numeric] [Missing=*] |         |                   |
| Statistikk [NW/ W]                                                                                                                   | [Gyldige=4689 /-] [Ugyldig=0 /-]             |         |                   |
| Verdi                                                                                                                                | Merkelapp                                    | Enheter | Prosent           |
| 1                                                                                                                                    | Mann                                         | 2355    | <div></div> 50.2% |
| 2                                                                                                                                    | Kvinne                                       | 2334    | <div></div> 49.8% |
| Advarsel: disse tallene indikerer antall enheter (cases) i datafilen. De kan ikke tolkes som oppsummert statistikk for populasjonen. |                                              |         |                   |
| # r7P2: Region                                                                                                                       |                                              |         |                   |
| Informasjon                                                                                                                          | [Type= diskret] [Format=numeric] [Missing=*] |         |                   |
| Statistikk [NW/ W]                                                                                                                   | [Gyldige=4689 /-] [Ugyldig=0 /-]             |         |                   |
| Verdi                                                                                                                                | Merkelapp                                    | Enheter | Prosent           |
| 1                                                                                                                                    | Oslo/Akershus                                | 1335    | <div></div> 28.5% |
| 2                                                                                                                                    | Østlandet                                    | 1133    | <div></div> 24.2% |
| 3                                                                                                                                    | Sørlandet                                    | 216     | <div></div> 4.6%  |
| 4                                                                                                                                    | Vestlandet                                   | 1235    | <div></div> 26.3% |
| 5                                                                                                                                    | Trøndelag                                    | 425     | <div></div> 9.1%  |
| 6                                                                                                                                    | Nord-Norge                                   | 345     | <div></div> 7.4%  |
| Advarsel: disse tallene indikerer antall enheter (cases) i datafilen. De kan ikke tolkes som oppsummert statistikk for populasjonen. |                                              |         |                   |
| # r7P3: Fylke                                                                                                                        |                                              |         |                   |
| Informasjon                                                                                                                          | [Type= diskret] [Format=numeric] [Missing=*] |         |                   |
| Statistikk [NW/ W]                                                                                                                   | [Gyldige=4689 /-] [Ugyldig=0 /-]             |         |                   |
| Verdi                                                                                                                                | Merkelapp                                    | Enheter | Prosent           |
| 1                                                                                                                                    | Akershus                                     | 582     | <div></div> 12.4% |
| 2                                                                                                                                    | Oslo                                         | 753     | <div></div> 16.1% |
| 3                                                                                                                                    | Østfold                                      | 240     | <div></div> 5.1%  |
| 4                                                                                                                                    | Vestfold                                     | 242     | <div></div> 5.2%  |
| 5                                                                                                                                    | Hedmark                                      | 131     | <div></div> 2.8%  |
| 6                                                                                                                                    | Oppland                                      | 137     | <div></div> 2.9%  |
| 7                                                                                                                                    | Buskerud                                     | 244     | <div></div> 5.2%  |
| 8                                                                                                                                    | Telemark                                     | 139     | <div></div> 3.0%  |
| 9                                                                                                                                    | Vest-Agder                                   | 141     | <div></div> 3.0%  |
| 10                                                                                                                                   | Aust-Agder                                   | 75      | <div></div> 1.6%  |
| 11                                                                                                                                   | Rogaland                                     | 409     | <div></div> 8.7%  |

| # r7P3: Fylke                                                                                                                        |                                                                                                                                                                                                               |                                              |                              |
|--------------------------------------------------------------------------------------------------------------------------------------|---------------------------------------------------------------------------------------------------------------------------------------------------------------------------------------------------------------|----------------------------------------------|------------------------------|
| Verdi                                                                                                                                | Merkelapp                                                                                                                                                                                                     | Enheter                                      | Prosent                      |
| 12                                                                                                                                   | Hordaland                                                                                                                                                                                                     | 550                                          | <div><div></div></div> 11.7% |
| 13                                                                                                                                   | Sogn og Fjordane                                                                                                                                                                                              | 82                                           | <div><div></div></div> 1.7%  |
| 14                                                                                                                                   | Møre og Romsdal                                                                                                                                                                                               | 194                                          | <div><div></div></div> 4.1%  |
| 15                                                                                                                                   | Sør-Trøndelag                                                                                                                                                                                                 | 333                                          | <div><div></div></div> 7.1%  |
| 16                                                                                                                                   | Nord-Trøndelag                                                                                                                                                                                                | 92                                           | <div><div></div></div> 2.0%  |
| 17                                                                                                                                   | Nordland                                                                                                                                                                                                      | 185                                          | <div><div></div></div> 3.9%  |
| 18                                                                                                                                   | Troms                                                                                                                                                                                                         | 117                                          | <div><div></div></div> 2.5%  |
| 19                                                                                                                                   | Finmark                                                                                                                                                                                                       | 43                                           | <div><div></div></div> 0.9%  |
| Advarsel: disse tallene indikerer antall enheter (cases) i datafilen. De kan ikke tolkes som oppsummert statistikk for populasjonen. |                                                                                                                                                                                                               |                                              |                              |
| # r7P4_1: Høyeste fullførte utdanning                                                                                                |                                                                                                                                                                                                               |                                              |                              |
| Informasjon                                                                                                                          |                                                                                                                                                                                                               | [Type= diskret] [Format=numeric] [Missing=*] |                              |
| Statistikk [NW/ W]                                                                                                                   |                                                                                                                                                                                                               | [Gyldige=4689 /-] [Ugyldig=0 /-]             |                              |
| Verdi                                                                                                                                | Merkelapp                                                                                                                                                                                                     | Enheter                                      | Prosent                      |
| 1                                                                                                                                    | Ingen utdanning/grunnskole                                                                                                                                                                                    | 428                                          | <div><div></div></div> 9.1%  |
| 2                                                                                                                                    | Videregående skole                                                                                                                                                                                            | 1378                                         | <div><div></div></div> 29.4% |
| 3                                                                                                                                    | Høgskole/Universitet                                                                                                                                                                                          | 2695                                         | <div><div></div></div> 57.5% |
| 97                                                                                                                                   | No answer                                                                                                                                                                                                     | 188                                          | <div><div></div></div> 4.0%  |
| Advarsel: disse tallene indikerer antall enheter (cases) i datafilen. De kan ikke tolkes som oppsummert statistikk for populasjonen. |                                                                                                                                                                                                               |                                              |                              |
| # r7P4_2: Høyeste fullførte utdanning                                                                                                |                                                                                                                                                                                                               |                                              |                              |
| Informasjon                                                                                                                          |                                                                                                                                                                                                               | [Type= diskret] [Format=numeric] [Missing=*] |                              |
| Statistikk [NW/ W]                                                                                                                   |                                                                                                                                                                                                               | [Gyldige=4689 /-] [Ugyldig=0 /-]             |                              |
| Verdi                                                                                                                                | Merkelapp                                                                                                                                                                                                     | Enheter                                      | Prosent                      |
| 1                                                                                                                                    | Ingen fullført utdanning                                                                                                                                                                                      | 18                                           | <div><div></div></div> 0.4%  |
| 2                                                                                                                                    | Barneskole (første del av obligatorisk utdanning)                                                                                                                                                             | 32                                           | <div><div></div></div> 0.7%  |
| 3                                                                                                                                    | Ungdomsskole (grunnskole, 7-årig folkeskole, framhaldskole, realskole)                                                                                                                                        | 378                                          | <div><div></div></div> 8.1%  |
| 4                                                                                                                                    | Vitnemål fra folkehøgskole                                                                                                                                                                                    | 43                                           | <div><div></div></div> 0.9%  |
| 5                                                                                                                                    | Videregående avsluttende utdanning, allmennfaglige studieretninger/studieforberedende utdanningsprogram, ettårig påbygging til studiekompetanse (VK2, VG trinn3, gymnas)                                      | 597                                          | <div><div></div></div> 12.7% |
| 6                                                                                                                                    | Videregående avsluttende utdanning, yrkesfaglige studieretninger/ utdanningsprogram (VK2, VK3, VG trinn3, fagprøve, svenneprøve)                                                                              | 566                                          | <div><div></div></div> 12.1% |
| 7                                                                                                                                    | Forkurs til universitet/høgskole som ikke gir studiepoeng                                                                                                                                                     | 52                                           | <div><div></div></div> 1.1%  |
| 8                                                                                                                                    | Vitnemål fra påbygging til videregående utdanning (fagskoleutdanning, teknisk fagskole )                                                                                                                      | 163                                          | <div><div></div></div> 3.5%  |
| 9                                                                                                                                    | Universitet/ høgskole, mindre enn 3 år, men minst 2 år (høgskolekandidat 2- og 2½- årig)                                                                                                                      | 451                                          | <div><div></div></div> 9.6%  |
| 10                                                                                                                                   | Fullført 3-4 årig utdanning fra høgskole (Bachelor-, cand.mag., lærerhøgskole, sykepleierhøgskole, førskolelærer, ingeniør, siviløkonom, m.m.)                                                                | 948                                          | <div><div></div></div> 20.2% |
| 11                                                                                                                                   | Fullført 3-4 årig utdanning fra universitet (Bachelor, cand.mag.)                                                                                                                                             | 301                                          | <div><div></div></div> 6.4%  |
| 12                                                                                                                                   | Fullført 5-6 årig utdanning fra høgskole (master, hovedfag)                                                                                                                                                   | 344                                          | <div><div></div></div> 7.3%  |
| 13                                                                                                                                   | Fullført 5-6 årig utdanning fra universitet (master, hovedfag), lengre profesjonsutdanning (cand. theol., cand.psychol., cand.med., cand.med.vet., sivilingeniør, sivilarkitekt, siviløkonom høyere avdeling) | 553                                          | <div><div></div></div> 11.8% |
| 14                                                                                                                                   | Forskernivå (Doktorgrad, Ph.d.)                                                                                                                                                                               | 98                                           | <div><div></div></div> 2.1%  |



| # r7P4_2: Høyeste fullførte utdanning                                                                                                |                  |                                                   |                              |
|--------------------------------------------------------------------------------------------------------------------------------------|------------------|---------------------------------------------------|------------------------------|
| Verdi                                                                                                                                | Merkelapp        | Enheter                                           | Prosent                      |
| 15                                                                                                                                   | Ingen av disse   | 116                                               | <div><div></div></div> 2.5%  |
| 97                                                                                                                                   | Ikke svart       | 29                                                | <div><div></div></div> 0.6%  |
| Advarsel: disse tallene indikerer antall enheter (cases) i datafilen. De kan ikke tolkes som oppsummert statistikk for populasjonen. |                  |                                                   |                              |
| # r7P5_1: Alder                                                                                                                      |                  |                                                   |                              |
| Informasjon                                                                                                                          |                  | [Type= diskret] [Format=numeric] [Missing=*]      |                              |
| Statistikk [NW/ W]                                                                                                                   |                  | [Gyldige=4689 /-] [Ugyldig=0 /-]                  |                              |
| Verdi                                                                                                                                | Merkelapp        | Enheter                                           | Prosent                      |
| 1                                                                                                                                    | 18-25 år         | 273                                               | <div><div></div></div> 5.8%  |
| 2                                                                                                                                    | 26-35 år         | 562                                               | <div><div></div></div> 12.0% |
| 3                                                                                                                                    | 36-45 år         | 724                                               | <div><div></div></div> 15.4% |
| 4                                                                                                                                    | 46-55 år         | 925                                               | <div><div></div></div> 19.7% |
| 5                                                                                                                                    | 56-65 år         | 1116                                              | <div><div></div></div> 23.8% |
| 6                                                                                                                                    | 66-75 år         | 872                                               | <div><div></div></div> 18.6% |
| 7                                                                                                                                    | 75 år og oppover | 217                                               | <div><div></div></div> 4.6%  |
| Advarsel: disse tallene indikerer antall enheter (cases) i datafilen. De kan ikke tolkes som oppsummert statistikk for populasjonen. |                  |                                                   |                              |
| # r7P5_2: Alder                                                                                                                      |                  |                                                   |                              |
| Informasjon                                                                                                                          |                  | [Type= diskret] [Format=numeric] [Missing=*]      |                              |
| Statistikk [NW/ W]                                                                                                                   |                  | [Gyldige=4689 /-] [Ugyldig=0 /-]                  |                              |
| Verdi                                                                                                                                | Merkelapp        | Enheter                                           | Prosent                      |
| 1                                                                                                                                    | 18-29 år         | 498                                               | <div><div></div></div> 10.6% |
| 2                                                                                                                                    | 30-59 år         | 2409                                              | <div><div></div></div> 51.4% |
| 3                                                                                                                                    | 60 og oppover    | 1782                                              | <div><div></div></div> 38.0% |
| Advarsel: disse tallene indikerer antall enheter (cases) i datafilen. De kan ikke tolkes som oppsummert statistikk for populasjonen. |                  |                                                   |                              |
| # r7Weight1: Vekt basert på variablene P3, P5_2 og P1. Se dokumentasjonsrapport                                                      |                  |                                                   |                              |
| Informasjon                                                                                                                          |                  | [Type= kontinuerlig] [Format=numeric] [Missing=*] |                              |
| Statistikk [NW/ W]                                                                                                                   |                  | [Gyldige=4689 /-] [Ugyldig=0 /-]                  |                              |
| # r7Weight2: Vekt basert på variablene P3, P5_2, P4_1 og P1. Se dokumentasjonsrapport                                                |                  |                                                   |                              |
| Informasjon                                                                                                                          |                  | [Type= kontinuerlig] [Format=numeric] [Missing=*] |                              |
| Statistikk [NW/ W]                                                                                                                   |                  | [Gyldige=4689 /-] [Ugyldig=0 /-]                  |                              |

# Appendiks

## R7PAD14\_6rows – med anbefalinger

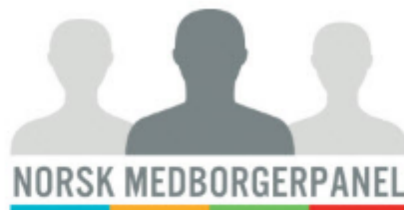

**Vi ønsker å studere hvilke mediasaker folk leser. Under er noen tenkte saker vi har laget som minner om de man kan finne i norske nettaviser. Vennligst les alle overskriftene nøye og se for deg at sakene er ekte.**

**Hvis du var nødt til å lese 3 saker, hvilke saker ville du foretrukket å bruke tiden din på?**

| <input type="checkbox"/> | Kilde             | Anbefalinger i sosiale medier | Overskrift                                                                                  |
|--------------------------|-------------------|-------------------------------|---------------------------------------------------------------------------------------------|
| <input type="checkbox"/> | Aftenposten       | 0 personer anbefaler          | Disse TV-ene kommer verst ut i vår nye test                                                 |
| <input type="checkbox"/> | Dagbladet         | 1211 personer anbefaler       | Frp-politiker fordømmes etter Facebook-innlegg: «vi trenger flere muslimer i norske skoler» |
| <input type="checkbox"/> | Dagens Næringsliv | 1054 personer anbefaler       | Tror Norge spiller uavgjort i morgendagens fotballkamp                                      |
| <input type="checkbox"/> | Klassekampen      | 106 personer anbefaler        | Lokal Mdg-politiker – vil ta imot 5000 nye flyktninger                                      |
| <input type="checkbox"/> | Aftenposten       | 0 personer anbefaler          | Sp-politiker får kjeft for forslag som vil øke inntektsforskjellene                         |
| <input type="checkbox"/> | Dagens Næringsliv | 98 personer anbefaler         | Lokal Mdg-politiker skjelles ut – vil ta imot 5000 nye flyktninger                          |

## R7PAD14\_4rows – uten anbefalinger

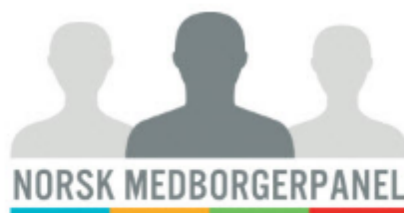

**Vi ønsker å studere hvilke mediasaker folk leser. Under er noen tenkte saker vi har laget som minner om de man kan finne i norske nettaviser. Vennligst les alle overskriftene nøye og se for deg at sakene er ekte.**

**Hvis du var nødt til å lese 3 saker, hvilke saker ville du foretrukket å bruke tiden din på?**

| <input type="checkbox"/> | Kilde             | Overskrift                                                                    |
|--------------------------|-------------------|-------------------------------------------------------------------------------|
| <input type="checkbox"/> | VG                | Roser forslag fra Sv-topp som vil øke lønnsforskjeller                        |
| <input type="checkbox"/> | Dagens Næringsliv | Venstre-topp presser på for å gi NAV-penger til Syriske flyktninger, får refs |
| <input type="checkbox"/> | Dagens Næringsliv | Mdg-representant vil åpne for at noen private skoler skal kunne ta ut profit  |
| <input type="checkbox"/> | Aftenposten       | Rødt-politiker får skryt for forslag som vil øke inntektsforskjellene         |

Neste

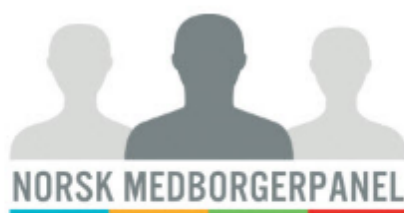

**Vi ønsker å studere hvilke mediesaker folk leser. Under er noen tenkte saker vi har laget som minner om de man kan finne i norske nettaviser. Vennligst les alle overskriftene nøye og se for deg at sakene er ekte.**

**Hvis du var nødt til å lese 2 saker, hvilke saker ville du foretrukket å bruke tiden din på?**

**Overskrift**

- ☐ Parti-profil møter begeistring - mener at kommersielle skoler bør forbys
- ☐ Høyre-politiker med homovennlig lovforslag
- ☐ Politiker på Facebook: «Homofile par MÅ få like rettigheter som heterofile»
- ☐ Venstre-topp: Vil innføre eiendomsskatt i alle norske byer.

Neste

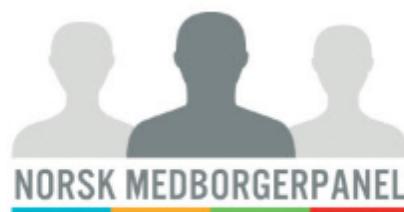

**Vi ønsker å studere hvilke mediesaker folk leser. Under er noen tenkte saker vi har laget som minner om de man kan finne i norske nettaviser. Vennligst les alle overskriftene nøye og se for deg at sakene er ekte.**

**Hvis du var nødt til å lese 1 sak, hvilken sak ville du foretrukket å bruke tiden din på?**

| Kilde                                      | Overskrift                                                                                         |
|--------------------------------------------|----------------------------------------------------------------------------------------------------|
| <input type="checkbox"/> Dagens Næringsliv | Frp-topp vil gi mer til de rike - blir refset                                                      |
| <input type="checkbox"/> TV2               | Sp-topp truer med å ta NAV-penger fra Syriske flyktinger, får refs                                 |
| <input type="checkbox"/> Dagbladet         | Mdg-politiker mener flyktinger ikke bør ha samme rett til sosialhjelp som nordmenn, blir skjelt ut |
| <input type="checkbox"/> VG                | Frp-profil møter begeistring for forslag om flere privatskoler i Norge                             |

Neste

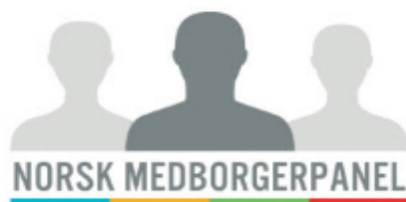

1 av 3

Folk har ulike politiske holdninger, og noen ganger er deres holdninger relatert til deres bakgrunn. Under har vi laget to tenkte politikere med forskjellig bakgrunn. Vi ønsker å vite hvilken av disse to du tipper vil være mest enig i påstanden under.

|                 | Politiker 1 | Politiker 2 |
|-----------------|-------------|-------------|
| Alder           | 60 år       | 50 år       |
| Kjønn           | Mann        | Mann        |
| Bosted          | Sørlandet   | Oslo        |
| Sivilstatus     | Bor alene   | Bor alene   |
| Utdanning       | Universitet | Grunnskole  |
| Religion        | Ingen       | Ingen       |
| Arbeidserfaring | Bonde       | Bonde       |

Vennligst velg hvem du tror er mest enig i følgende påstand:  
«Staten bør bidra til å redusere inntektsforskjeller i samfunnet.»

Politiker 1    Politiker 2

Neste

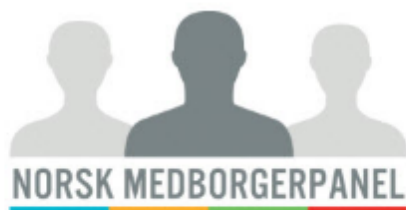

Vi er opptatt av å forstå hvordan folk oppfører seg i økonomiske valgsituasjoner. Vi vil derfor be deg om å ta én anonym beslutning hvor du kan trekkes til å motta penger.

Du og en annen tilfeldig person kan velge mellom en **gul** eller **blå** boks.

Hvis begge velger den gule boksen får dere 1000 kroner hver. Hvis du velger blå og den andre gul får du 1500 kroner og den andre får 0 kroner. Hvis begge velger blå får dere 500 kroner hver. Uansett hva den andre gjør tjener du mest på å velge blå. Vi trekker ut ti personer som mottar penger.

Neste

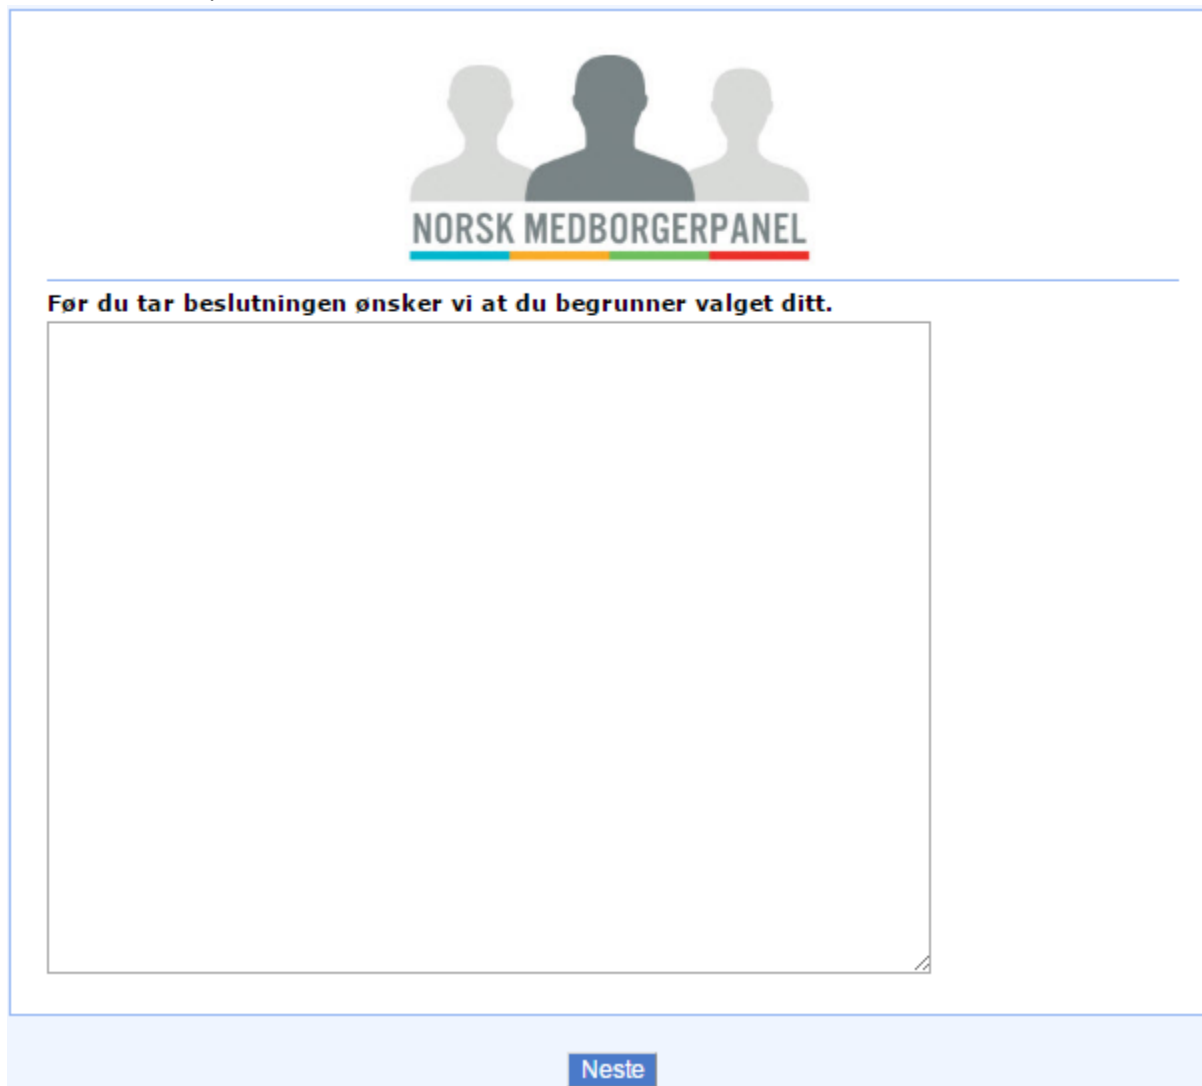

---

**Før du tar beslutningen ønsker vi at du begrunner valget ditt.**

Neste

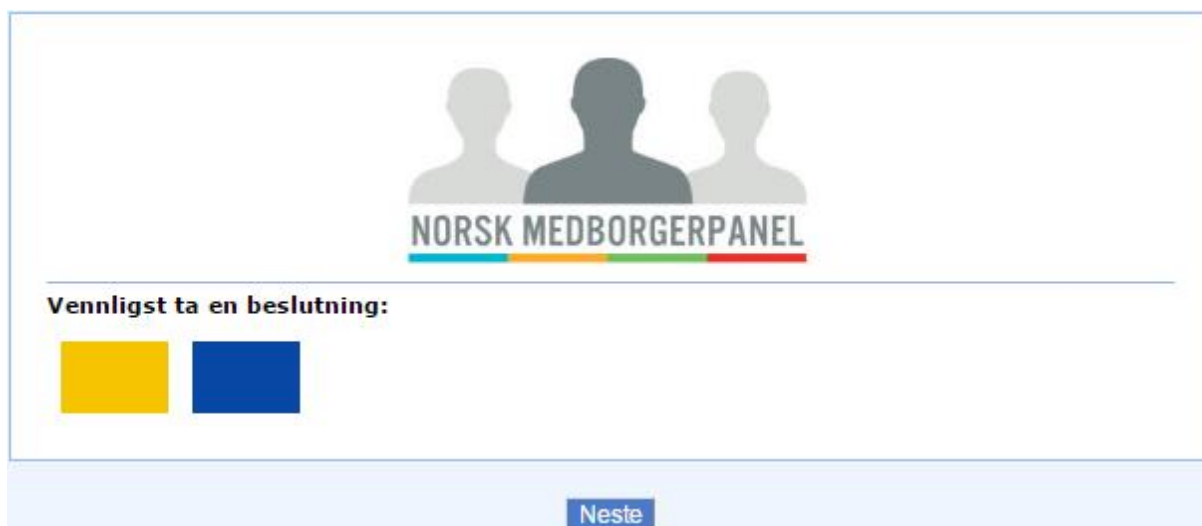

---

**Vennligst ta en beslutning:**



Neste
