# Supplementary material
Source: publisher figshare collection journal article supplement (https://sage.figshare.com/ndownloader/files/14963900)
Supplement: Supplementary file 5 [file 14963900]

**Norway**

**Elisabeth Ivarsflaten, Coordinator, University of Bergen  
Sveinung Arnesen, Bjarte Folkestad, Endre Tvinnereim, Åsta Dyrnes  
Nordø, Mikael Poul Johannesson, Erik Knudsen, Nina Serdarevic,  
Scientific team, University of Bergen and UNI Research Rokkan Centre**

## **Norwegian Citizen Panel 2016**

### **Study Documentation**

December 16, 2016

# Metadata Production

|                             |                                                                                                                                                           |
|-----------------------------|-----------------------------------------------------------------------------------------------------------------------------------------------------------|
| <b>Metadata Producer(s)</b> | Asle Høgestøl , ideas2evidence , Coordinator<br>Øivind Skjervheim , ideas2evidence , Coordinator<br>Jostein Ryssevik , ideas2evidence , Quality assurance |
| <b>Production Date</b>      | December 4, 2016                                                                                                                                          |
| <b>Identification</b>       | NMP-16-2                                                                                                                                                  |

# Table of Contents

|                                                     |                    |
|-----------------------------------------------------|--------------------|
| <a href="#">Overview.....</a>                       | <a href="#">4</a>  |
| <a href="#">Scope &amp; Coverage.....</a>           | <a href="#">4</a>  |
| <a href="#">Producers &amp; Sponsors.....</a>       | <a href="#">4</a>  |
| <a href="#">Sampling.....</a>                       | <a href="#">4</a>  |
| <a href="#">Data Collection.....</a>                | <a href="#">5</a>  |
| <a href="#">Files Description.....</a>              | <a href="#">6</a>  |
| <a href="#">Norsk medborgerpanel - runde 7.....</a> | <a href="#">6</a>  |
| <a href="#">Variables List.....</a>                 | <a href="#">7</a>  |
| <a href="#">Norsk medborgerpanel - runde 7.....</a> | <a href="#">7</a>  |
| <a href="#">Variables Description.....</a>          | <a href="#">47</a> |
| <a href="#">Norsk medborgerpanel - runde 7.....</a> | <a href="#">48</a> |

## Norwegian Citizen Panel 2016

### Overview

|                         |                                                                                                                                                                                                                                                                                                                                                                                                                                                                                                                                                                                                                                                                                                                                                                                                                                                                                                                                                  |
|-------------------------|--------------------------------------------------------------------------------------------------------------------------------------------------------------------------------------------------------------------------------------------------------------------------------------------------------------------------------------------------------------------------------------------------------------------------------------------------------------------------------------------------------------------------------------------------------------------------------------------------------------------------------------------------------------------------------------------------------------------------------------------------------------------------------------------------------------------------------------------------------------------------------------------------------------------------------------------------|
| <b>Identification</b>   | NMP-16-2                                                                                                                                                                                                                                                                                                                                                                                                                                                                                                                                                                                                                                                                                                                                                                                                                                                                                                                                         |
| <b>Abstract</b>         | <p>The Norwegian Citizen Panel is a platform for internet surveys of public opinion in important areas of society and politics in Norway. Participants are randomly recruited from the Norwegian population register, and they are encouraged to participate over time. The panel was fielded for the first time the fall of 2013 and the survey is carried out twice a year. The University of Bergen owns and is responsible for the Citizen panel. The company Ideas 2 Evidence recruits respondents, produces the survey, and provides documentation of the data. Data is stored and shared by the Norwegian Social Science Data services (NSD). The Norwegian Citizen Panel welcomes research proposals for survey content. More information about calls and other updates is available at <a href="http://www.medborger.uib.no">www.medborger.uib.no</a> &lt;<a href="http://www.medborger.uib.no">http://www.medborger.uib.no</a>&gt;</p> |
| <b>Unit of Analysis</b> | Individuals                                                                                                                                                                                                                                                                                                                                                                                                                                                                                                                                                                                                                                                                                                                                                                                                                                                                                                                                      |

### Scope & Coverage

|                            |                                                              |
|----------------------------|--------------------------------------------------------------|
| <b>Countries</b>           | Norway                                                       |
| <b>Geographic Coverage</b> | National geographic coverage. Counties as geographic coding. |
| <b>Universe</b>            | Norwegian Citizens above the age of 18.                      |

### Producers & Sponsors

|                                |                                                                                                                                                                                                                                                                   |
|--------------------------------|-------------------------------------------------------------------------------------------------------------------------------------------------------------------------------------------------------------------------------------------------------------------|
| <b>Primary Investigator(s)</b> | Elisabeth Ivarsflaten, Coordinator, University of Bergen<br>Sveinung Arnesen, Bjarte Folkestad, Endre Tvinnereim, Åsta Dyrnes Nordø, Mikael Poul Johannesson, Erik Knudsen, Nina Serdarevic, Scientific team, University of Bergen and UNI Research Rokkan Centre |
| <b>Other Producer(s)</b>       | Asle Høgestøl , ideas2evidence , Coordinator<br>Øivind Skjervheim , ideas2evidence , Coordinator<br>Jostein Ryssevik , ideas2evidence , Quality assurance                                                                                                         |

### Sampling

#### Sampling Procedure

Members of the Norwegian Citizen Panel have been recruited in two waves, wave 1 and wave 3. In wave 1 4.870 panel members were recruited (see documentation from wave 1). In wave 3 5.623 members were recruited. Prior to wave 7 the Norwegian Citizen Panel had 10,179 members.

The sampling procedure of wave 2 and wave 1 is identical. 25 000 individuals over the age of 18 were randomly drawn from the Norwegian National Population Registry. The extracted data was a) last name, b) first name, c) address, d) gender, and e) age. The sample excluded people with no current home address in Norway.

#### Weighting

To compensate for the observed bias, a set of weights has been calculated. The weights equal the relation between a given strata in the population and the total population, divided by the relation between a given strata in the net sample and the total net sample. This procedure returns values around 1, but above 0. Respondents who are underrepresented will receive a weight above 1 and respondents who are overrepresented a weight below 1. The weights of the different strata are listed in the documentation report (table 8 in the appendix).

When calculating the weights, the information regarding the respondent's geographical location, gender and age are based on registry data. These attributes were included in the sample file we received from the Norwegian Population

Register. Information regarding the level of education is provided by the respondents when answering the questionnaire. Approximately 9 percent of the net sample did not answer this question. Because of this, two different weights have been calculated:

- Weight 1 based on demographic variables (age, gender and geography)
- Weight 2 combining the demographic variables with education. Respondents with missing data on the education variable are only weighted on demography (the education component of the weight is set to 1 in these cases).

When applied, both weights will provide a weighted N equal to the number of cases in the dataset.

We will strongly recommend using weight 2 in any statistical analysis, as this weight provides the most accurate compensation for the various sources of bias in the net sample.

| Data Collection             |                                                                                                                                                                                                                                                                                                                                                                                                                                                                                                                                                                                                                                                                                                                                                                                                                                                                                                                                                                                                                                                                                                                                                                                                                                                                                                                                                                 |
|-----------------------------|-----------------------------------------------------------------------------------------------------------------------------------------------------------------------------------------------------------------------------------------------------------------------------------------------------------------------------------------------------------------------------------------------------------------------------------------------------------------------------------------------------------------------------------------------------------------------------------------------------------------------------------------------------------------------------------------------------------------------------------------------------------------------------------------------------------------------------------------------------------------------------------------------------------------------------------------------------------------------------------------------------------------------------------------------------------------------------------------------------------------------------------------------------------------------------------------------------------------------------------------------------------------------------------------------------------------------------------------------------------------|
| <b>Data Collection Mode</b> | <p>The survey is based on an online questionnaire. Existing members receive e-mail invitations asking for their participation in the current wave.</p> <p>New panel members were recruited in multiple steps.</p> <p>First, letters were sent to everyone in the sample. The letters contained the following information:</p> <p>a) a description of the project, b) the Citizen Panel's policy on privacy and measures taken to protect the anonymity of the participants, c) the time-frame of the project, d) the participants' rights to opt out of the panel at any time in the future, e) contact information for the people responsible for the project, f) a unique log-in id and the web address to the panel's web site and g) the estimated time required to complete the survey (20 minutes).</p> <p>Prospective respondents in the sample that did not register as a panel member after a certain time period received a reminder sent as a post card.</p> <p>In the second recruitment round all respondents that had not accessed or completed the survey after receiving both a letter and a post card were sent a reminder to their mobile phones (depending on whether or not they were registered with a phone number in the Population Register). A randomly drawn subset of the gross sample were also contacted via a telephone call.</p> |

|                     |  |
|---------------------|--|
| <b>Depositor(s)</b> |  |
|---------------------|--|

# Files Description

Dataset contains 1 file(s)

| Norsk medborgerpanel - runde 7 |      |
|--------------------------------|------|
| # Cases                        | 4689 |
| # Variable(s)                  | 613  |

# Variables List

Dataset contains 613 variable(s)

| File Norsk medborgerpanel - runde 7 |                             |                                                                                                                                                                                                    |          |              |       |         |                                                                                 |
|-------------------------------------|-----------------------------|----------------------------------------------------------------------------------------------------------------------------------------------------------------------------------------------------|----------|--------------|-------|---------|---------------------------------------------------------------------------------|
| #                                   | Name                        | Label                                                                                                                                                                                              | Type     | Format       | Valid | Invalid | Question                                                                        |
| 1                                   | <a href="#">responseid</a>  | responseid                                                                                                                                                                                         | discrete | numeric-12.0 | -     | -       | -                                                                               |
| 2                                   | <a href="#">r7u</a>         | Respondent sub-group                                                                                                                                                                               | discrete | numeric-12.0 | 4689  | 0       | -                                                                               |
| 3                                   | <a href="#">r7recrui ..</a> | Recruitment wave                                                                                                                                                                                   | discrete | numeric-12.0 | 4689  | 0       | -                                                                               |
| 4                                   | <a href="#">r7browse ..</a> | Browertype used by respondent                                                                                                                                                                      | discrete | character-16 | 4689  | 0       | -                                                                               |
| 5                                   | <a href="#">r7browse ..</a> | Browser version used by respondent                                                                                                                                                                 | discrete | character-4  | 4689  | 0       | -                                                                               |
| 6                                   | <a href="#">r7mobile</a>    | Determines if the respondents uses mobile                                                                                                                                                          | discrete | numeric-12.0 | 4689  | 0       | -                                                                               |
| 7                                   | <a href="#">r7device ..</a> | Screen resolution of the applied device                                                                                                                                                            | discrete | character-9  | 4689  | 0       | -                                                                               |
| 8                                   | <a href="#">r7device</a>    | Determines respondents device type.                                                                                                                                                                | discrete | numeric-12.0 | 4689  | 0       | -                                                                               |
| 9                                   | <a href="#">r7advanc ..</a> | Determine whether the respondent's browser supports Advanced WI Features that require client side scripts, such as sliders, drag-n-drop ranking, images instead of radio-buttons/ check-boxes etc. | discrete | character-5  | 4689  | 0       | -                                                                               |
| 10                                  | <a href="#">r7ktilfr ..</a> | Satisfied with: Life at the moment                                                                                                                                                                 | discrete | numeric-12.0 | 4689  | 0       | Life at the moment?                                                             |
| 11                                  | <a href="#">r7ktilfr ..</a> | Satisfied with: Your personal economy                                                                                                                                                              | discrete | numeric-12.0 | 4689  | 0       | Your personal economy?                                                          |
| 12                                  | <a href="#">r7ktilfr ..</a> | Satisfied with: The government in Norway                                                                                                                                                           | discrete | numeric-12.0 | 4689  | 0       | The present government in Norway?                                               |
| 13                                  | <a href="#">r7ktilfr ..</a> | Satisfied with: How democracy works in Norway                                                                                                                                                      | discrete | numeric-12.0 | 4689  | 0       | The way in which democracy works in Norway?                                     |
| 14                                  | <a href="#">r7k10</a>       | Perception of the economic situation in Norway                                                                                                                                                     | discrete | numeric-12.0 | 4689  | 0       | How do you perceive the current economic situation to be in Norway?             |
| 15                                  | <a href="#">r7k204</a>      | Would vote for following party at parliamentary election tomorrow                                                                                                                                  | discrete | numeric-12.0 | 4689  | 0       | Which party would you vote for if there were a parliamentary election tomorrow? |
| 16                                  | <a href="#">r7k204_1 ..</a> | Would vote for following party at parliamentary election tomorrow, other [anonymized]                                                                                                              | discrete | character-50 | 4689  | 0       | Which party would you vote for if there were a parliamentary election tomorrow? |
| 17                                  | <a href="#">r7k6_1</a>      | Like/dislike: The Christian Democrats                                                                                                                                                              | discrete | numeric-12.0 | 4689  | 0       | The Christian Democrats                                                         |
| 18                                  | <a href="#">r7k6_2</a>      | Like/dislike: The Conservative Party                                                                                                                                                               | discrete | numeric-12.0 | 4689  | 0       | The Conservative Party                                                          |
| 19                                  | <a href="#">r7k6_3</a>      | Like/dislike: The Progress Party                                                                                                                                                                   | discrete | numeric-12.0 | 4689  | 0       | The Progress Party                                                              |
| 20                                  | <a href="#">r7k6_4</a>      | Like/dislike: The Liberal Party                                                                                                                                                                    | discrete | numeric-12.0 | 4689  | 0       | The Liberal Party                                                               |

**File Norsk medborgerpanel - runde 7**

| #  | Name                        | Label                                                                                                  | Type     | Format       | Valid | Invalid | Question                                                                                                                                                                                 |
|----|-----------------------------|--------------------------------------------------------------------------------------------------------|----------|--------------|-------|---------|------------------------------------------------------------------------------------------------------------------------------------------------------------------------------------------|
| 21 | <a href="#">r7k6_5</a>      | Like/dislike: The Socialist Left Party                                                                 | discrete | numeric-12.0 | 4689  | 0       | The Socialist Left Party                                                                                                                                                                 |
| 22 | <a href="#">r7k6_6</a>      | Like/dislike: The Centre Party                                                                         | discrete | numeric-12.0 | 4689  | 0       | The Centre Party                                                                                                                                                                         |
| 23 | <a href="#">r7k6_7</a>      | Like/dislike: The Green Party                                                                          | discrete | numeric-12.0 | 4689  | 0       | The Green Party                                                                                                                                                                          |
| 24 | <a href="#">r7k6_8</a>      | Like/dislike: The Labour Party                                                                         | discrete | numeric-12.0 | 4689  | 0       | The Labour Party                                                                                                                                                                         |
| 25 | <a href="#">r7k6_9</a>      | Like/dislike: The Red Party                                                                            | discrete | numeric-12.0 | 4689  | 0       | The Red Party                                                                                                                                                                            |
| 26 | <a href="#">r7k9_1</a>      | [1] Most important political issues [anonymized]                                                       | discrete | character-54 | 4689  | 0       | What are the most important political issues or topics for you personally?                                                                                                               |
| 27 | <a href="#">r7k9_2</a>      | [2] Most important political issues [anonymized]                                                       | discrete | character-54 | 4689  | 0       | What are the most important political issues or topics for you personally?                                                                                                               |
| 28 | <a href="#">r7k9_3</a>      | [3] Most important political issues [anonymized]                                                       | discrete | character-55 | 4689  | 0       | What are the most important political issues or topics for you personally?                                                                                                               |
| 29 | <a href="#">r7ocrecs_..</a> | R7OCRECSM_mobil                                                                                        | discrete | numeric-12.0 | 1199  | 3490    | -                                                                                                                                                                                        |
| 30 | <a href="#">r7ran20</a>     | [Randomizes if u=2. ]                                                                                  | discrete | numeric-12.0 | 1199  | 3490    | -                                                                                                                                                                                        |
| 31 | <a href="#">r7ocrecs_..</a> | How important is good education in deciding whether someone could come and live here?                  | discrete | numeric-12.0 | 4689  | 0       | How important do you think having good educational qualifications should be in deciding whether someone born, brought up and living outside Norway should be able to come and live here? |
| 32 | <a href="#">r7ocrecs_..</a> | How important is a Christian background in deciding whether someone could come and live here?          | discrete | numeric-12.0 | 4689  | 0       | How important do you think coming from a Christian background should be in deciding whether someone should be able to come and live here?                                                |
| 33 | <a href="#">r7ocrecs_..</a> | How important is having skills that Norway needs in deciding whether someone could come and live here? | discrete | numeric-12.0 | 4689  | 0       | How important do you think having work skills that Norway needs should be in deciding whether someone should be able to come and live here?                                              |
| 34 | <a href="#">r7ocrecs_..</a> | How important is good education in deciding whether someone could come and live here?                  | discrete | numeric-12.0 | 4689  | 0       | How important do you think having good educational qualifications should be in deciding whether someone born, brought up and living outside Norway should be able to come and live here? |
| 35 | <a href="#">r7ocrecs_..</a> | How important is good education in deciding whether someone could come and live here?                  | discrete | numeric-12.0 | 4689  | 0       | How important do you think having good educational qualifications should be in deciding whether someone born, brought up and living outside Norway should be able to come and live here? |
| 36 | <a href="#">r7ocrecs_..</a> | How important is a Christian background in deciding whether someone could come and live here?          | discrete | numeric-12.0 | 4689  | 0       | How important do you think coming from a Christian background should be in deciding whether someone should be able to come and live here?                                                |
| 37 | <a href="#">r7ocrecs_..</a> | How important is a Christian background in deciding whether someone could come and live here?          | discrete | numeric-12.0 | 4689  | 0       | How important do you think coming from a Christian background should be in deciding whether someone should be able to come and live here?                                                |
| 38 | <a href="#">r7ocrecs_..</a> | How important is having skills that Norway needs in deciding whether someone could come and live here? | discrete | numeric-12.0 | 4689  | 0       | How important do you think having work skills that Norway needs should be in deciding whether someone should be able to come and live here?                                              |
| 39 | <a href="#">r7ocrecs_..</a> | How important is having skills that Norway needs in                                                    | discrete | numeric-12.0 | 4689  | 0       | How important do you think having work skills that Norway needs should be                                                                                                                |



**File Norsk medborgerpanel - runde 7**

| #  | Name                         | Label                                                                                                         | Type     | Format       | Valid | Invalid | Question                                                                                                                                                                                 |
|----|------------------------------|---------------------------------------------------------------------------------------------------------------|----------|--------------|-------|---------|------------------------------------------------------------------------------------------------------------------------------------------------------------------------------------------|
|    |                              | deciding whether someone could come and live here?                                                            |          |              |       |         | in deciding whether someone should be able to come and live here?                                                                                                                        |
| 40 | <a href="#">r7ocreces ..</a> | How important is good education in deciding whether someone could come and live here?                         | discrete | numeric-12.0 | 4689  | 0       | How important do you think having good educational qualifications should be in deciding whether someone born, brought up and living outside Norway should be able to come and live here? |
| 41 | <a href="#">r7ocreces ..</a> | How important is good education in deciding whether someone could come and live here?                         | discrete | numeric-12.0 | 4689  | 0       | How important do you think having good educational qualifications should be in deciding whether someone born, brought up and living outside Norway should be able to come and live here? |
| 42 | <a href="#">r7ocreces ..</a> | How important is a Christian background in deciding whether someone could come and live here?                 | discrete | numeric-12.0 | 4689  | 0       | How important do you think coming from a Christian background should be in deciding whether someone should be able to come and live here?                                                |
| 43 | <a href="#">r7ocreces ..</a> | How important is a Christian background in deciding whether someone could come and live here?                 | discrete | numeric-12.0 | 4689  | 0       | How important do you think coming from a Christian background should be in deciding whether someone should be able to come and live here?                                                |
| 44 | <a href="#">r7ocreces ..</a> | How important is having skills that Norway needs in deciding whether someone could come and live here?        | discrete | numeric-12.0 | 4689  | 0       | How important do you think having work skills that Norway needs should be in deciding whether someone should be able to come and live here?                                              |
| 45 | <a href="#">r7ocreces ..</a> | How important is having skills that Norway needs in deciding whether someone could come and live here?        | discrete | numeric-12.0 | 4689  | 0       | How important do you think having work skills that Norway needs should be in deciding whether someone should be able to come and live here?                                              |
| 46 | <a href="#">r7ocreces ..</a> | To what extent should the Supreme Court's power in controversial issues be reduced?                           | discrete | numeric-12.0 | 4689  | 0       | In general, to what extent do you think the Norwegian Supreme Court's power to decide certain types of controversial issues should be reduced?                                           |
| 47 | <a href="#">r7ocreces ..</a> | To what extent does the Supreme Court favor certain groups?                                                   | discrete | numeric-12.0 | 4689  | 0       | To what extent do you think the decisions of the Norwegian Supreme Court favor certain groups more than others?                                                                          |
| 48 | <a href="#">r7ocreces ..</a> | To what extent could the Supreme Court be dissolved, if it makes several decisions most people disagree with? | discrete | numeric-12.0 | 4689  | 0       | And to what extent do you think that If the Norwegian Supreme Court starts to make several decisions that most people disagree with, the institution might just as well be dissolved?    |
| 49 | <a href="#">r7ocreces ..</a> | To what extent should the Supreme Court's power in controversial issues be reduced?                           | discrete | numeric-12.0 | 4689  | 0       | In general, to what extent do you think the Norwegian Supreme Court's power to decide certain types of controversial issues should be reduced?                                           |
| 50 | <a href="#">r7ocreces ..</a> | To what extent should the Supreme Court's power in controversial issues be reduced?                           | discrete | numeric-12.0 | 4689  | 0       | In general, to what extent do you think the Norwegian Supreme Court's power to decide certain types of controversial issues should be reduced?                                           |
| 51 | <a href="#">r7ocreces ..</a> | To what extent does the Supreme Court favor certain groups?                                                   | discrete | numeric-12.0 | 4689  | 0       | To what extent do you think the decisions of the Norwegian Supreme Court favor certain groups more than others?                                                                          |
| 52 | <a href="#">r7ocreces ..</a> | To what extent does the Supreme Court favor certain groups?                                                   | discrete | numeric-12.0 | 4689  | 0       | To what extent do you think the decisions of the Norwegian Supreme Court favor certain groups more than others?                                                                          |

**File Norsk medborgerpanel - runde 7**

| #  | Name                       | Label                                                                                                         | Type     | Format       | Valid | Invalid | Question                                                                                                                                                                              |
|----|----------------------------|---------------------------------------------------------------------------------------------------------------|----------|--------------|-------|---------|---------------------------------------------------------------------------------------------------------------------------------------------------------------------------------------|
| 53 | <a href="#">r7ocrecs..</a> | To what extent could the Supreme Court be dissolved, if it makes several decisions most people disagree with? | discrete | numeric-12.0 | 4689  | 0       | And to what extent do you think that If the Norwegian Supreme Court starts to make several decisions that most people disagree with, the institution might just as well be dissolved? |
| 54 | <a href="#">r7ocrecs..</a> | To what extent could the Supreme Court be dissolved, if it makes several decisions most people disagree with? | discrete | numeric-12.0 | 4689  | 0       | And to what extent do you think that If the Norwegian Supreme Court starts to make several decisions that most people disagree with, the institution might just as well be dissolved? |
| 55 | <a href="#">r7ocrecs..</a> | To what extent should the Supreme Court's power in controversial issues be reduced?                           | discrete | numeric-12.0 | 4689  | 0       | In general, to what extent do you think the Norwegian Supreme Court's power to decide certain types of controversial issues should be reduced?                                        |
| 56 | <a href="#">r7ocrecs..</a> | To what extent should the Supreme Court's power in controversial issues be reduced?                           | discrete | numeric-12.0 | 4689  | 0       | In general, to what extent do you think the Norwegian Supreme Court's power to decide certain types of controversial issues should be reduced?                                        |
| 57 | <a href="#">r7ocrecs..</a> | To what extent does the Supreme Court favor certain groups?                                                   | discrete | numeric-12.0 | 4689  | 0       | To what extent do you think the decisions of the Norwegian Supreme Court favor certain groups more than others?                                                                       |
| 58 | <a href="#">r7ocrecs..</a> | To what extent does the Supreme Court favor certain groups?                                                   | discrete | numeric-12.0 | 4689  | 0       | To what extent do you think the decisions of the Norwegian Supreme Court favor certain groups more than others?                                                                       |
| 59 | <a href="#">r7ocrecs..</a> | To what extent could the Supreme Court be dissolved, if it makes several decisions most people disagree with? | discrete | numeric-12.0 | 4689  | 0       | And to what extent do you think that If the Norwegian Supreme Court starts to make several decisions that most people disagree with, the institution might just as well be dissolved? |
| 60 | <a href="#">r7ocrecs..</a> | To what extent could the Supreme Court be dissolved, if it makes several decisions most people disagree with? | discrete | numeric-12.0 | 4689  | 0       | And to what extent do you think that If the Norwegian Supreme Court starts to make several decisions that most people disagree with, the institution might just as well be dissolved? |
| 61 | <a href="#">r7mi1</a>      | Personal thoughts when you hear the word "Muslim" [anonymized]                                                | discrete | character-53 | 4689  | 0       | What are your personal thoughts when you hear the word "Muslim"?                                                                                                                      |
| 62 | <a href="#">r7ran1</a>     | [Randomizes if u!=2. ]                                                                                        | discrete | numeric-12.0 | 3490  | 1199    | -                                                                                                                                                                                     |
| 63 | <a href="#">r7km1a</a>     | Thoughts when you hear/read the words "oil and gas" [anonymized]                                              | discrete | character-56 | 4689  | 0       | What do you think when you hear or read the words "oil and gas"?                                                                                                                      |
| 64 | <a href="#">r7km1b</a>     | Thoughts when you hear/read the word "energy" [anonymized]                                                    | discrete | character-54 | 4689  | 0       | What do you think when you hear or read the word "energy"?                                                                                                                            |
| 65 | <a href="#">r7km1c</a>     | Thoughts when you hear/read the word "reorganisation" [anonymized]                                            | discrete | character-54 | 4689  | 0       | What do you think when you hear or read the word "reorganisation"?                                                                                                                    |
| 66 | <a href="#">r7dv30_1</a>   | Statement: The tax burden should be reduced                                                                   | discrete | numeric-12.0 | 4689  | 0       | The tax burden should be reduced, even if it leads to cutbacks in the welfare state.                                                                                                  |
| 67 | <a href="#">r7dv30_2</a>   | Statement: Commercial private schools should be allowed                                                       | discrete | numeric-12.0 | 4689  | 0       | Commercial private schools should be allowed.                                                                                                                                         |

| File Norsk medborgerpanel - runde 7 |                           |                                                                                                                                  |          |              |       |         |                                                                                                                                                                            |
|-------------------------------------|---------------------------|----------------------------------------------------------------------------------------------------------------------------------|----------|--------------|-------|---------|----------------------------------------------------------------------------------------------------------------------------------------------------------------------------|
| #                                   | Name                      | Label                                                                                                                            | Type     | Format       | Valid | Invalid | Question                                                                                                                                                                   |
| 68                                  | <a href="#">r7dv30_3</a>  | Statement: Heterosexual and homosexual couples should have equal rights                                                          | discrete | numeric-12.0 | 4689  | 0       | Heterosexual and homosexual couples should have equal rights.                                                                                                              |
| 69                                  | <a href="#">r7dv30_4</a>  | Statement: It is better for a country if there is a diversity of different religions and beliefs                                 | discrete | numeric-12.0 | 4689  | 0       | It is better for a country if there is a diversity of different religions and beliefs.                                                                                     |
| 70                                  | <a href="#">r7ran40</a>   | [All respondents randomized. ]                                                                                                   | discrete | numeric-12.0 | 1199  | 3490    | -                                                                                                                                                                          |
| 71                                  | <a href="#">r7dvh_1</a>   | Statement: We should not allow oil and gas extraction in the Lofoten and Vesterålen areas                                        | discrete | numeric-12.0 | 4689  | 0       | We should not allow oil and gas extraction in the area by Lofoten and Vesterålen.                                                                                          |
| 72                                  | <a href="#">r7dvh_2</a>   | Statement: Refugees should have the same rights to social assistance as Norwegians have, even if they are not Norwegian citizens | discrete | numeric-12.0 | 4689  | 0       | Refugees should have the same rights to social assistance as Norwegians have, even if they are not Norwegian citizens.                                                     |
| 73                                  | <a href="#">r7dvh_3</a>   | Statement: Many public activities could be done better and cheaper by the private sector                                         | discrete | numeric-12.0 | 4689  | 0       | Many public activities could have been carried out both with better results and at lower cost, if they were operated by the private sector.                                |
| 74                                  | <a href="#">r7dvh_4</a>   | Statement: The state should help reduce income disparities                                                                       | discrete | numeric-12.0 | 4689  | 0       | The government should contribute to reducing income differences in society.                                                                                                |
| 75                                  | <a href="#">r7ran2</a>    | [All respondents randomized. ]                                                                                                   | discrete | numeric-12.0 | 4681  | 8       | -                                                                                                                                                                          |
| 76                                  | <a href="#">r7km13_1</a>  | Should put a greater stake into reducing emission in Norway, abroad or both                                                      | discrete | numeric-12.0 | 4689  | 0       | Should the authorities put a greater stake into reducing emissions in Norway or abroad, or the same amount for both?                                                       |
| 77                                  | <a href="#">r7km13_2</a>  | Statement: Most of the reductions in emissions Norway has committed to should be carried out abroad                              | discrete | numeric-12.0 | 4689  | 0       | “Most of the reductions in emissions of greenhouse gases that Norway has committed to should be carried out abroad”                                                        |
| 78                                  | <a href="#">r7elite_1</a> | Statement: We agree on which actions that needs to be completed, but little is happening because of the authorities              | discrete | numeric-12.0 | 4689  | 0       | We are in agreement regarding most of the actions that need to be completed in this country, but very little is happening because the authorities are standing in the way. |
| 79                                  | <a href="#">r7elite_2</a> | Statement: Politicians maintain close contact with the electorate in the whole of the country                                    | discrete | numeric-12.0 | 4689  | 0       | Most of the professional politicians in Norway maintain close contact with the electorate in the whole of the country.                                                     |
| 80                                  | <a href="#">r7elite_3</a> | Statement: Many important decisions made by small group without ordinary people's knowledge                                      | discrete | numeric-12.0 | 4689  | 0       | In this country, many important decisions are made by a small group of people without the ordinary people being told.                                                      |
| 81                                  | <a href="#">r7elite_4</a> | Statement: Difference between politicians same as between ordinary people                                                        | discrete | numeric-12.0 | 4689  | 0       | The differences amongst politicians are the same as between ordinary people.                                                                                               |
| 82                                  | <a href="#">r7ran5</a>    | [Randomizes if u=2. ]                                                                                                            | discrete | numeric-12.0 | 1195  | 3494    | -                                                                                                                                                                          |
| 83                                  | <a href="#">r7mi4_1</a>   | Do leaders care mostly for themselves, or do they try to do what they feel is right?                                             | discrete | numeric-12.0 | 4689  | 0       | What is your opinion?                                                                                                                                                      |

**File Norsk medborgerpanel - runde 7**

| #  | Name                       | Label                                                                                                                              | Type     | Format       | Valid | Invalid | Question                                                                                                                                                                                                      |
|----|----------------------------|------------------------------------------------------------------------------------------------------------------------------------|----------|--------------|-------|---------|---------------------------------------------------------------------------------------------------------------------------------------------------------------------------------------------------------------|
| 84 | <a href="#">r7mi4_2</a>    | Do Muslim leaders care mostly for themselves, or do they try to do what they feel is right?                                        | discrete | numeric-12.0 | 4689  | 0       | What is your opinion?                                                                                                                                                                                         |
| 85 | <a href="#">r7pad10_1</a>  | Statement: Immigrant children of parents that are illegal residents should be able to remain if parents deported                   | discrete | numeric-12.0 | 4689  | 0       | Immigrant children of parents that are illegal residents in Norway should have the right to remain in the country if the parents are deported.                                                                |
| 86 | <a href="#">r7pad10_2</a>  | Statement: If an employer supplies you with a phone, the employer should have the right to read text-messages/e-mails on the phone | discrete | numeric-12.0 | 4689  | 0       | If an employer supplies you with a mobile phone for use in connection with your employment, the employer should have the right to read all the text messages or e-mails you send and receive with this phone. |
| 87 | <a href="#">r7pad10_3</a>  | Statement: Not possible to bring neighbour disputes to court before mediation                                                      | discrete | numeric-12.0 | 4689  | 0       | It should not be possible to bring neighbour disputes (like the height of trees and fences) to court, without first having tried to resolve the conflict by mediation.                                        |
| 88 | <a href="#">r7k15_1</a>    | Can most people be trusted?                                                                                                        | discrete | numeric-12.0 | 4689  | 0       | Would you say that most people in general can be trusted, or do you think that one cannot be careful enough when dealing with others?                                                                         |
| 89 | <a href="#">r7pad14_..</a> | Randomly selects a version of the conjunction-experiment. Background variable conjunction experiment R7PAD14.                      | discrete | numeric-12.0 | 4659  | 30      | -                                                                                                                                                                                                             |
| 90 | <a href="#">r7pad14_..</a> | The number of articles the respondent can select. Background variable conjunction experiment R7PAD14.                              | discrete | numeric-12.0 | 4659  | 30      | -                                                                                                                                                                                                             |
| 91 | <a href="#">r7pad14_..</a> | Randomly chosen source nr. 1. Background variable conjunction experiment R7PAD14.                                                  | discrete | character-18 | 4689  | 0       | -                                                                                                                                                                                                             |
| 92 | <a href="#">r7pad14_..</a> | Randomly chosen source nr. 2. Background variable conjunction experiment R7PAD14.                                                  | discrete | character-18 | 4689  | 0       | -                                                                                                                                                                                                             |
| 93 | <a href="#">r7pad14_..</a> | Randomly chosen source nr. 3. Background variable conjunction experiment R7PAD14.                                                  | discrete | character-18 | 4689  | 0       | -                                                                                                                                                                                                             |
| 94 | <a href="#">r7pad14_..</a> | Randomly chosen source nr. 4. Background variable conjunction experiment R7PAD14.                                                  | discrete | character-18 | 4689  | 0       | -                                                                                                                                                                                                             |
| 95 | <a href="#">r7pad14_..</a> | Randomly chosen source nr. 5. Background variable conjunction experiment R7PAD14.                                                  | discrete | character-18 | 4689  | 0       | -                                                                                                                                                                                                             |
| 96 | <a href="#">r7pad14_..</a> | Randomly chosen source nr. 6. Background variable                                                                                  | discrete | character-18 | 4689  | 0       | -                                                                                                                                                                                                             |

| File Norsk medborgerpanel - runde 7 |                            |                                                                                                                                                 |          |              |       |         |          |
|-------------------------------------|----------------------------|-------------------------------------------------------------------------------------------------------------------------------------------------|----------|--------------|-------|---------|----------|
| #                                   | Name                       | Label                                                                                                                                           | Type     | Format       | Valid | Invalid | Question |
|                                     |                            | conjunction experiment R7PAD14.                                                                                                                 |          |              |       |         |          |
| 97                                  | <a href="#">r7pad14_..</a> | Dichotomy whether the articles should be listed with endorsements, or not. Background variable conjunction experiment R7PAD14.                  | discrete | numeric-12.0 | 4659  | 30      | -        |
| 98                                  | <a href="#">r7pad14_..</a> | Randomly chosen endorsement nr. 1. Background variable conjunction experiment R7PAD14.                                                          | discrete | character-23 | 4689  | 0       | -        |
| 99                                  | <a href="#">r7pad14_..</a> | Randomly chosen endorsement nr. 2. Background variable conjunction experiment R7PAD14.                                                          | discrete | character-23 | 4689  | 0       | -        |
| 100                                 | <a href="#">r7pad14_..</a> | Randomly chosen endorsement nr. 3. Background variable conjunction experiment R7PAD14.                                                          | discrete | character-23 | 4689  | 0       | -        |
| 101                                 | <a href="#">r7pad14_..</a> | Randomly chosen endorsement nr. 4. Background variable conjunction experiment R7PAD14.                                                          | discrete | character-23 | 4689  | 0       | -        |
| 102                                 | <a href="#">r7pad14_..</a> | Randomly chosen endorsement nr. 5. Background variable conjunction experiment R7PAD14.                                                          | discrete | character-23 | 4689  | 0       | -        |
| 103                                 | <a href="#">r7pad14_..</a> | Randomly chosen endorsement nr. 6. Background variable conjunction experiment R7PAD14.                                                          | discrete | character-23 | 4689  | 0       | -        |
| 104                                 | <a href="#">r7pad14_..</a> | Randomly chosen article headline nr. 1. Background variable conjunction experiment R7PAD14. Background variable conjunction experiment R7PAD14. | discrete | character-55 | 4689  | 0       | -        |
| 105                                 | <a href="#">r7pad14_..</a> | Randomly chosen article headline nr. 2. Background variable conjunction experiment R7PAD14. Background variable conjunction experiment R7PAD14. | discrete | character-55 | 4689  | 0       | -        |
| 106                                 | <a href="#">r7pad14_..</a> | Randomly chosen article headline nr. 3. Background variable conjunction experiment R7PAD14. Background variable conjunction experiment R7PAD14. | discrete | character-55 | 4689  | 0       | -        |

| File Norsk medborgerpanel - runde 7 |                             |                                                                                                                                                                          |          |              |       |         |          |
|-------------------------------------|-----------------------------|--------------------------------------------------------------------------------------------------------------------------------------------------------------------------|----------|--------------|-------|---------|----------|
| #                                   | Name                        | Label                                                                                                                                                                    | Type     | Format       | Valid | Invalid | Question |
| 107                                 | <a href="#">r7pad14_..</a>  | Randomly chosen article headline nr. 4. Background variable conjunction experiment R7PAD14. Background variable conjunction experiment R7PAD14.                          | discrete | character-55 | 4689  | 0       | -        |
| 108                                 | <a href="#">r7pad14_..</a>  | Randomly chosen article headline nr. 5. Background variable conjunction experiment R7PAD14. Background variable conjunction experiment R7PAD14.                          | discrete | character-55 | 4689  | 0       | -        |
| 109                                 | <a href="#">r7pad14_..</a>  | Randomly chosen article headline nr. 6. Background variable conjunction experiment R7PAD14. Background variable conjunction experiment R7PAD14.                          | discrete | character-55 | 4689  | 0       | -        |
| 110                                 | <a href="#">r7selexp_..</a> | The number of articles the respondent can select. Background variable conjunction experiment R7PAD14.                                                                    | discrete | numeric-12.0 | 4659  | 30      | -        |
| 111                                 | <a href="#">r7selexp_..</a> | Dichotomy whether the articles should be listed with sources, or not. Background variable conjunction experiment R7PAD14.                                                | discrete | numeric-12.0 | 4659  | 30      | -        |
| 112                                 | <a href="#">r7selexp_..</a> | Randomly chosen source nr. 1. Background variable conjunction experiment R7PAD14.                                                                                        | discrete | character-18 | 4689  | 0       | -        |
| 113                                 | <a href="#">r7selexp_..</a> | Randomly chosen source nr. 2. Background variable conjunction experiment R7PAD14.                                                                                        | discrete | character-18 | 4689  | 0       | -        |
| 114                                 | <a href="#">r7selexp_..</a> | Randomly chosen source nr. 3. Background variable conjunction experiment R7PAD14.                                                                                        | discrete | character-18 | 4689  | 0       | -        |
| 115                                 | <a href="#">r7selexp_..</a> | Randomly chosen source nr. 4. Background variable conjunction experiment R7PAD14.                                                                                        | discrete | character-18 | 4689  | 0       | -        |
| 116                                 | <a href="#">r7selexp_..</a> | Randomly decides whether the article headlines should appear with party and valence, or any combination of the two. Background variable conjunction experiment R7selexp2 | discrete | numeric-12.0 | 4659  | 30      | -        |
| 117                                 | <a href="#">r7selexp_..</a> | Randomly chosen article headline nr. 1. Background variable conjunction experiment R7PAD14.                                                                              | discrete | character-55 | 4689  | 0       | -        |

**File Norsk medborgerpanel - runde 7**

| #   | Name                       | Label                                                                                                                         | Type     | Format       | Valid | Invalid | Question                                                                                                                                                                                                      |
|-----|----------------------------|-------------------------------------------------------------------------------------------------------------------------------|----------|--------------|-------|---------|---------------------------------------------------------------------------------------------------------------------------------------------------------------------------------------------------------------|
| 118 | <a href="#">r7selexp..</a> | Randomly chosen article headline nr. 2. Background variable conjunction experiment R7PAD14.                                   | discrete | character-55 | 4689  | 0       | -                                                                                                                                                                                                             |
| 119 | <a href="#">r7selexp..</a> | Randomly chosen article headline nr. 3. Background variable conjunction experiment R7PAD14.                                   | discrete | character-55 | 4689  | 0       | -                                                                                                                                                                                                             |
| 120 | <a href="#">r7selexp..</a> | Randomly chosen article headline nr. 4. Background variable conjunction experiment R7PAD14.                                   | discrete | character-55 | 4689  | 0       | -                                                                                                                                                                                                             |
| 121 | <a href="#">r7pad14_..</a> | Article 1. List of randomly selected articles by which the respondent has to pick which ones to read. Conjunction experiment. | discrete | numeric-12.0 | 4689  | 0       | If you had to read [1 article /2 articles /3 articles], which [article /articles] would you have preferred to spend your time by? [Here follows a list of randomly chosen articles. See background variables] |
| 122 | <a href="#">r7pad14_..</a> | Article 2. List of randomly selected articles by which the respondent has to pick which ones to read. Conjunction experiment. | discrete | numeric-12.0 | 4689  | 0       | If you had to read [1 article /2 articles /3 articles], which [article /articles] would you have preferred to spend your time by? [Here follows a list of randomly chosen articles. See background variables] |
| 123 | <a href="#">r7pad14_..</a> | Article 3. List of randomly selected articles by which the respondent has to pick which ones to read. Conjunction experiment. | discrete | numeric-12.0 | 4689  | 0       | If you had to read [1 article /2 articles /3 articles], which [article /articles] would you have preferred to spend your time by? [Here follows a list of randomly chosen articles. See background variables] |
| 124 | <a href="#">r7pad14_..</a> | Article 4. List of randomly selected articles by which the respondent has to pick which ones to read. Conjunction experiment. | discrete | numeric-12.0 | 4689  | 0       | If you had to read [1 article /2 articles /3 articles], which [article /articles] would you have preferred to spend your time by? [Here follows a list of randomly chosen articles. See background variables] |
| 125 | <a href="#">r7pad14_..</a> | Article 1. List of randomly selected articles by which the respondent has to pick which ones to read. Conjunction experiment. | discrete | numeric-12.0 | 4689  | 0       | If you had to read [1 article /2 articles /3 articles], which [article /articles] would you have preferred to spend your time by? [Here follows a list of randomly chosen articles. See background variables] |
| 126 | <a href="#">r7pad14_..</a> | Article 2. List of randomly selected articles by which the respondent has to pick which ones to read. Conjunction experiment. | discrete | numeric-12.0 | 4689  | 0       | If you had to read [1 article /2 articles /3 articles], which [article /articles] would you have preferred to spend your time by? [Here follows a list of randomly chosen articles. See background variables] |
| 127 | <a href="#">r7pad14_..</a> | Article 3. List of randomly selected articles by which the respondent has to pick which ones to read. Conjunction experiment. | discrete | numeric-12.0 | 4689  | 0       | If you had to read [1 article /2 articles /3 articles], which [article /articles] would you have preferred to spend your time by? [Here follows a list of randomly chosen articles. See background variables] |
| 128 | <a href="#">r7pad14_..</a> | Article 4. List of randomly selected articles by which the respondent has to pick which ones to read. Conjunction experiment. | discrete | numeric-12.0 | 4689  | 0       | If you had to read [1 article /2 articles /3 articles], which [article /articles] would you have preferred to spend your time by? [Here follows a list of randomly                                            |

**File Norsk medborgerpanel - runde 7**

| #   | Name                        | Label                                                                                                                                  | Type     | Format       | Valid | Invalid | Question                                                                                                                                                                                                      |
|-----|-----------------------------|----------------------------------------------------------------------------------------------------------------------------------------|----------|--------------|-------|---------|---------------------------------------------------------------------------------------------------------------------------------------------------------------------------------------------------------------|
|     |                             |                                                                                                                                        |          |              |       |         | chosen articles. See background variables]                                                                                                                                                                    |
| 129 | <a href="#">r7pad14_..</a>  | Article 5. List of randomly selected articles by which the respondent has to pick which ones to read. Conjunction experiment.          | discrete | numeric-12.0 | 4689  | 0       | If you had to read [1 article /2 articles /3 articles], which [article /articles] would you have preferred to spend your time by? [Here follows a list of randomly chosen articles. See background variables] |
| 130 | <a href="#">r7pad14_..</a>  | Article 6. List of randomly selected articles by which the respondent has to pick which ones to read. Conjunction experiment.          | discrete | numeric-12.0 | 4689  | 0       | If you had to read [1 article /2 articles /3 articles], which [article /articles] would you have preferred to spend your time by? [Here follows a list of randomly chosen articles. See background variables] |
| 131 | <a href="#">r7selexp_..</a> | Article 1. List of randomly selected articles by which the respondent has to pick which ones to read. Conjunction experiment.          | discrete | numeric-12.0 | 4689  | 0       | If you had to read [1 article /2 articles /3articles], which [article / articles] would you have preferred to spend your time by? [Here follows a list of randomly chosen articles. See background variables] |
| 132 | <a href="#">r7selexp_..</a> | Article 2. List of randomly selected articles by which the respondent has to pick which ones to read. Conjunction experiment.          | discrete | numeric-12.0 | 4689  | 0       | If you had to read [1 article /2 articles /3articles], which [article / articles] would you have preferred to spend your time by? [Here follows a list of randomly chosen articles. See background variables] |
| 133 | <a href="#">r7selexp_..</a> | Article 3. List of randomly selected articles by which the respondent has to pick which ones to read. Conjunction experiment.          | discrete | numeric-12.0 | 4689  | 0       | If you had to read [1 article /2 articles /3articles], which [article / articles] would you have preferred to spend your time by? [Here follows a list of randomly chosen articles. See background variables] |
| 134 | <a href="#">r7selexp_..</a> | Article 4. List of randomly selected articles by which the respondent has to pick which ones to read. Conjunction experiment.          | discrete | numeric-12.0 | 4689  | 0       | If you had to read [1 article /2 articles /3articles], which [article / articles] would you have preferred to spend your time by? [Here follows a list of randomly chosen articles. See background variables] |
| 135 | <a href="#">r7Error_..</a>  | 36 respondents experienced an error in experiment r7pad14 and r7selexp2. The error stopped them from progressing in the questionnaire. | discrete | numeric-12.0 | 4689  | 0       | -                                                                                                                                                                                                             |
| 136 | <a href="#">r7selexp_..</a> | The order of which r7pad14 and r7selexp is asked. The order is randomized.                                                             | discrete | character-17 | 4689  | 0       | -                                                                                                                                                                                                             |
| 137 | <a href="#">r7pad6_p_..</a> | Characteristic for profile 1: age. Background variable for r7pad6.                                                                     | discrete | character-6  | 4689  | 0       | -                                                                                                                                                                                                             |
| 138 | <a href="#">r7pad6_p_..</a> | Characteristic for profile 1: gender. Background variable for r7pad6.                                                                  | discrete | character-6  | 4689  | 0       | -                                                                                                                                                                                                             |
| 139 | <a href="#">r7pad6_p_..</a> | Characteristic for profile 1: from. Background variable for r7pad6.                                                                    | discrete | character-10 | 4689  | 0       | -                                                                                                                                                                                                             |
| 140 | <a href="#">r7pad6_p_..</a> | Characteristic for profile 1: relationship status.                                                                                     | discrete | character-9  | 4689  | 0       | -                                                                                                                                                                                                             |



**File Norsk medborgerpanel - runde 7**

| #   | Name                       | Label                                                                              | Type     | Format       | Valid | Invalid | Question |
|-----|----------------------------|------------------------------------------------------------------------------------|----------|--------------|-------|---------|----------|
|     |                            | Background variable for r7pad6.                                                    |          |              |       |         |          |
| 141 | <a href="#">r7pad6_p..</a> | Characteristic for profile 1: education. Background variable for r7pad6.           | discrete | character-13 | 4689  | 0       | -        |
| 142 | <a href="#">r7pad6_p..</a> | Characteristic for profile 1: religion. Background variable for r7pad6.            | discrete | character-10 | 4689  | 0       | -        |
| 143 | <a href="#">r7pad6_p..</a> | Characteristic for profile 1: work experience. Background variable for r7pad6.     | discrete | character-28 | 4689  | 0       | -        |
| 144 | <a href="#">r7pad6_p..</a> | Characteristic for profile 2: age. Background variable for r7pad6.                 | discrete | character-6  | 4689  | 0       | -        |
| 145 | <a href="#">r7pad6_p..</a> | Characteristic for profile 2: gender. Background variable for r7pad6.              | discrete | character-6  | 4689  | 0       | -        |
| 146 | <a href="#">r7pad6_p..</a> | Characteristic for profile 2: from. Background variable for r7pad6.                | discrete | character-10 | 4689  | 0       | -        |
| 147 | <a href="#">r7pad6_p..</a> | Characteristic for profile 2: relationship status. Background variable for r7pad6. | discrete | character-9  | 4689  | 0       | -        |
| 148 | <a href="#">r7pad6_p..</a> | Characteristic for profile 2: education. Background variable for r7pad6.           | discrete | character-13 | 4689  | 0       | -        |
| 149 | <a href="#">r7pad6_p..</a> | Characteristic for profile 2: religion. Background variable for r7pad6.            | discrete | character-10 | 4689  | 0       | -        |
| 150 | <a href="#">r7pad6_p..</a> | Characteristic for profile 2: work experience. Background variable for r7pad6.     | discrete | character-28 | 4689  | 0       | -        |
| 151 | <a href="#">r7pad7_p..</a> | Characteristic for profile 1: age. Background variable for r7pad7.                 | discrete | character-6  | 4689  | 0       | -        |
| 152 | <a href="#">r7pad7_p..</a> | Characteristic for profile 1: gender. Background variable for r7pad7.              | discrete | character-6  | 4689  | 0       | -        |
| 153 | <a href="#">r7pad7_p..</a> | Characteristic for profile 1: from. Background variable for r7pad7.                | discrete | character-10 | 4689  | 0       | -        |
| 154 | <a href="#">r7pad7_p..</a> | Characteristic for profile 1: relationship status. Background variable for r7pad7. | discrete | character-9  | 4689  | 0       | -        |
| 155 | <a href="#">r7pad7_p..</a> | Characteristic for profile 1: education. Background variable for r7pad7.           | discrete | character-13 | 4689  | 0       | -        |
| 156 | <a href="#">r7pad7_p..</a> | Characteristic for profile 1: religion. Background variable for r7pad7.            | discrete | character-10 | 4689  | 0       | -        |

**File Norsk medborgerpanel - runde 7**

| #   | Name                       | Label                                                                              | Type     | Format       | Valid | Invalid | Question |
|-----|----------------------------|------------------------------------------------------------------------------------|----------|--------------|-------|---------|----------|
| 157 | <a href="#">r7pad7_p..</a> | Characteristic for profile 1: work experiencee. Background variable for r7pad7.    | discrete | character-28 | 4689  | 0       | -        |
| 158 | <a href="#">r7pad7_p..</a> | Characteristic for profile 2: age. Background variable for r7pad7.                 | discrete | character-6  | 4689  | 0       | -        |
| 159 | <a href="#">r7pad7_p..</a> | Characteristic for profile 2: gender. Background variable for r7pad7.              | discrete | character-6  | 4689  | 0       | -        |
| 160 | <a href="#">r7pad7_p..</a> | Characteristic for profile 2: from. Background variable for r7pad7.                | discrete | character-10 | 4689  | 0       | -        |
| 161 | <a href="#">r7pad7_p..</a> | Characteristic for profile 2: relationship status. Background variable for r7pad7. | discrete | character-9  | 4689  | 0       | -        |
| 162 | <a href="#">r7pad7_p..</a> | Characteristic for profile 2: education. Background variable for r7pad7.           | discrete | character-13 | 4689  | 0       | -        |
| 163 | <a href="#">r7pad7_p..</a> | Characteristic for profile 2: religion. Background variable for r7pad7.            | discrete | character-10 | 4689  | 0       | -        |
| 164 | <a href="#">r7pad7_p..</a> | Characteristic for profile 2: work experiencee. Background variable for r7pad7.    | discrete | character-28 | 4689  | 0       | -        |
| 165 | <a href="#">r7pad8_p..</a> | Characteristic for profile 1: age. Background variable for r7pad8.                 | discrete | character-6  | 4689  | 0       | -        |
| 166 | <a href="#">r7pad8_p..</a> | Characteristic for profile 1: gender. Background variable for r7pad8.              | discrete | character-6  | 4689  | 0       | -        |
| 167 | <a href="#">r7pad8_p..</a> | Characteristic for profile 1: from. Background variable for r7pad8.                | discrete | character-10 | 4689  | 0       | -        |
| 168 | <a href="#">r7pad8_p..</a> | Characteristic for profile 1: relationship status. Background variable for r7pad8. | discrete | character-9  | 4689  | 0       | -        |
| 169 | <a href="#">r7pad8_p..</a> | Characteristic for profile 1: education. Background variable for r7pad8.           | discrete | character-13 | 4689  | 0       | -        |
| 170 | <a href="#">r7pad8_p..</a> | Characteristic for profile 1: religion. Background variable for r7pad8.            | discrete | character-10 | 4689  | 0       | -        |
| 171 | <a href="#">r7pad8_p..</a> | Characteristic for profile 1: work experiencee. Background variable for r7pad8.    | discrete | character-28 | 4689  | 0       | -        |
| 172 | <a href="#">r7pad8_p..</a> | Characteristic for profile 2: age. Background variable for r7pad8.                 | discrete | character-6  | 4689  | 0       | -        |

| File Norsk medborgerpanel - runde 7 |                            |                                                                                                                                                                       |          |              |       |         |                                                                                                                                                                                                                     |
|-------------------------------------|----------------------------|-----------------------------------------------------------------------------------------------------------------------------------------------------------------------|----------|--------------|-------|---------|---------------------------------------------------------------------------------------------------------------------------------------------------------------------------------------------------------------------|
| #                                   | Name                       | Label                                                                                                                                                                 | Type     | Format       | Valid | Invalid | Question                                                                                                                                                                                                            |
| 173                                 | <a href="#">r7pad8_p..</a> | Characteristic for profile 2: gender. Background variable for r7pad8.                                                                                                 | discrete | character-6  | 4689  | 0       | -                                                                                                                                                                                                                   |
| 174                                 | <a href="#">r7pad8_p..</a> | Characteristic for profile 2: from. Background variable for r7pad8.                                                                                                   | discrete | character-10 | 4689  | 0       | -                                                                                                                                                                                                                   |
| 175                                 | <a href="#">r7pad8_p..</a> | Characteristic for profile 2: relationship status. Background variable for r7pad8.                                                                                    | discrete | character-9  | 4689  | 0       | -                                                                                                                                                                                                                   |
| 176                                 | <a href="#">r7pad8_p..</a> | Characteristic for profile 2: education. Background variable for r7pad8.                                                                                              | discrete | character-13 | 4689  | 0       | -                                                                                                                                                                                                                   |
| 177                                 | <a href="#">r7pad8_p..</a> | Characteristic for profile 2: religion. Background variable for r7pad8.                                                                                               | discrete | character-10 | 4689  | 0       | -                                                                                                                                                                                                                   |
| 178                                 | <a href="#">r7pad8_p..</a> | Characteristic for profile 2: work experience. Background variable for r7pad8.                                                                                        | discrete | character-28 | 4689  | 0       | -                                                                                                                                                                                                                   |
| 179                                 | <a href="#">r7ran34</a>    | [Randomizes if u=3. ]                                                                                                                                                 | discrete | numeric-12.0 | 1092  | 3597    | -                                                                                                                                                                                                                   |
| 180                                 | <a href="#">r7pad6a</a>    | Attitudes related to background: Persons, "The government should contribute towards reducing income differences in society"                                           | discrete | numeric-12.0 | 4689  | 0       | "The government should contribute towards reducing income differences in society." [Here follows a list of randomly chosen person characteristics. See background variables.]                                       |
| 181                                 | <a href="#">r7pad6b</a>    | Attitudes related to background: Politicians, "The government should contribute towards reducing income differences in society"                                       | discrete | numeric-12.0 | 4689  | 0       | "The government should contribute towards reducing income differences in society." [Here follows a list of randomly chosen person characteristics. See background variables.]                                       |
| 182                                 | <a href="#">r7pad7a</a>    | Attitudes related to background: Persons, "Refugees should have the same rights to social assistance as Norwegians have, even if they are not Norwegian citizens"     | discrete | numeric-12.0 | 4689  | 0       | "Refugees should have the same rights to social assistance as Norwegians have, even if they are not Norwegian citizens." [Here follows a list of randomly chosen person characteristics. See background variables.] |
| 183                                 | <a href="#">r7pad7b</a>    | Attitudes related to background: Politicians, "Refugees should have the same rights to social assistance as Norwegians have, even if they are not Norwegian citizens" | discrete | numeric-12.0 | 4689  | 0       | "Refugees should have the same rights to social assistance as Norwegians have, even if they are not Norwegian citizens." [Here follows a list of randomly chosen person characteristics. See background variables.] |
| 184                                 | <a href="#">r7pad8a</a>    | Attitudes related to background: Persons, "Most of the reductions in emissions of greenhouse gases that Norway has committed to, should be carried out abroad"        | discrete | numeric-12.0 | 4689  | 0       | "Most of the reductions in emissions of greenhouse gases that Norway has committed to, should be carried out abroad." [Here follows a list of randomly chosen person characteristics. See background variables.]    |
| 185                                 | <a href="#">r7pad8b</a>    | Attitudes related to background: Politicians, "Most of the reductions in emissions of greenhouse gases that Norway has                                                | discrete | numeric-12.0 | 4689  | 0       | "Most of the reductions in emissions of greenhouse gases that Norway has committed to, should be carried out abroad." [Here follows a list of                                                                       |

**File Norsk medborgerpanel - runde 7**

| #   | Name                      | Label                                                                                  | Type     | Format       | Valid | Invalid | Question                                                                                                                                                                                                                                                              |
|-----|---------------------------|----------------------------------------------------------------------------------------|----------|--------------|-------|---------|-----------------------------------------------------------------------------------------------------------------------------------------------------------------------------------------------------------------------------------------------------------------------|
|     |                           | committed to, should be carried out abroad"                                            |          |              |       |         | randomly chosen person characteristics. See background variables.]                                                                                                                                                                                                    |
| 186 | <a href="#">r7fri1_1</a>  | Volunteering: Art and culture, band and choir                                          | discrete | numeric-12.0 | 4689  | 0       | Art and culture, band and choir [Music, theatre and dance. Art, applied arts and architecture. History, literature and language. Museums, collections and libraries. Periodicals and media. Other cultural and artistic activities]                                   |
| 187 | <a href="#">r7fri1_2</a>  | Volunteering: Athletics and sport                                                      | discrete | numeric-12.0 | 4689  | 0       | Athletics and sport [All types of athletics, sports and exercise, rifle club, company sports and disabled sports]                                                                                                                                                     |
| 188 | <a href="#">r7fri1_3</a>  | Volunteering: Hobbies, recreation, outdoor activity                                    | discrete | numeric-12.0 | 4689  | 0       | Hobbies, recreation, outdoor activity [Outdoor recreation and scouts. Car and boat clubs. Animal owner clubs. Pensioners' clubs. Student societies. Social clubs - Rotary, Lions etc. Other hobbies and recreational activities]                                      |
| 189 | <a href="#">r7fri1_4</a>  | Volunteering: Education, training and research                                         | discrete | numeric-12.0 | 4689  | 0       | <a href="#">r7fri1_4 question details</a>                                                                                                                                                                                                                             |
| 190 | <a href="#">r7fri1_5</a>  | Volunteering: Health, nursing and rescue work                                          | discrete | numeric-12.0 | 4689  | 0       | Health, nursing and rescue work [Hospital. Rehabilitation. Nursing home. Sheltered housing and home care services. Psychiatric institutions. Out-patient health services. Alternative medicine. Rescue work and ambulance services]                                   |
| 191 | <a href="#">r7fri1_6</a>  | Volunteering: Social services and substance abuse care                                 | discrete | numeric-12.0 | 4689  | 0       | Social services and substance abuse care [Kindergartens. The Norwegian Red Cross. Blue Cross Norway. Norwegian People's Aid. Family counselling. Crisis centres and telephones. Services for the disabled. Services for the elderly. Self-help and volunteer centres] |
| 192 | <a href="#">r7fri1_7</a>  | Volunteering: Nature, environmental and animal protection                              | discrete | numeric-12.0 | 4689  | 0       | Nature, environmental and animal protection [Nature and environmental protection. Area preservation and area management. Animal protection. Veterinary services]                                                                                                      |
| 193 | <a href="#">r7fri1_8</a>  | Volunteering: Residents' associations, community associations and local neighbourhood  | discrete | numeric-12.0 | 4689  | 0       | Residents' associations, community associations and local neighbourhood [Meeting house]                                                                                                                                                                               |
| 194 | <a href="#">r7fri1_9</a>  | Volunteering: Housing co-operatives and housing associations                           | discrete | numeric-12.0 | 4689  | 0       | Housing co-operatives and housing associations [Homeowner associations]                                                                                                                                                                                               |
| 195 | <a href="#">r7fri1_10</a> | Volunteering: Rights, support and advocacy work                                        | discrete | numeric-12.0 | 4689  | 0       | Rights, support and advocacy work [Disabled and ill. Women's rights. Language societies. Ethnic minorities. Weak/exposed groups, prisoners, the poor. Campaigns and lobbying]                                                                                         |
| 196 | <a href="#">r7fri1_11</a> | Volunteering: Political parties                                                        | discrete | numeric-12.0 | 4689  | 0       | Political parties [Youth political parties]                                                                                                                                                                                                                           |
| 197 | <a href="#">r7fri1_12</a> | Volunteering: International exchange, emergency help, assistance and human rights work | discrete | numeric-12.0 | 4689  | 0       | International exchange, emergency help, assistance and human rights work [International friendship and exchange programmes. International relief and development assistance. Human rights and peace work]                                                             |

**File Norsk medborgerpanel - runde 7**

| #   | Name                        | Label                                                                                            | Type     | Format       | Valid | Invalid | Question                                                                                                                                                                                                                                  |
|-----|-----------------------------|--------------------------------------------------------------------------------------------------|----------|--------------|-------|---------|-------------------------------------------------------------------------------------------------------------------------------------------------------------------------------------------------------------------------------------------|
| 198 | <a href="#">r7fri1_13</a>   | Volunteering: Vocational, industry and trade unions and associations                             | discrete | numeric-12.0 | 4689  | 0       | Vocational, industry and trade unions and associations [Employee organisations. Employer organisations. Trade and industry associations. Producers co-operatives. Pupil and student organisations.]                                       |
| 199 | <a href="#">r7fri1_14</a>   | Volunteering: Religion and beliefs including the Church of Norway                                | discrete | numeric-12.0 | 4689  | 0       | Religion and beliefs including the Church of Norway [Organisations linked to the Church of Norway. Mission. Protestant free church. Other religions. Belief organisations, also non-religious such as the Norwegian Humanist Association] |
| 200 | <a href="#">r7fri1_15</a>   | Volunteering: Immigrant organisations                                                            | discrete | numeric-12.0 | 4689  | 0       | Immigrant organisations [Organisations linked to country background, culture, identity outside Norway]                                                                                                                                    |
| 201 | <a href="#">r7fri1_16</a>   | Volunteering: Other, specify                                                                     | discrete | numeric-12.0 | 4689  | 0       | Other, specify                                                                                                                                                                                                                            |
| 202 | <a href="#">r7fri1_1_..</a> | Volunteering: Other, specify [anonymized]                                                        | discrete | character-34 | 4689  | 0       | Other, specify                                                                                                                                                                                                                            |
| 203 | <a href="#">r7fri1_17</a>   | No, not volunteering                                                                             | discrete | numeric-12.0 | 4689  | 0       | No                                                                                                                                                                                                                                        |
| 204 | <a href="#">r7fri2</a>      | How much time spent volunteering during a week, last year                                        | discrete | numeric-12.0 | 4689  | 0       | If you think about the last year as a whole, roughly how much time did you spend on voluntary work during an ordinary week?                                                                                                               |
| 205 | <a href="#">r7fri1b_1</a>   | Volunteered for what within health/nursing/rescue: Health                                        | discrete | numeric-12.0 | 4689  | 0       | Health                                                                                                                                                                                                                                    |
| 206 | <a href="#">r7fri1b_2</a>   | Volunteered for what within health/nursing/rescue: Nursing                                       | discrete | numeric-12.0 | 4689  | 0       | Nursing                                                                                                                                                                                                                                   |
| 207 | <a href="#">r7fri1b_3</a>   | Volunteered for what within health/nursing/rescue: Emergency/Rescue work                         | discrete | numeric-12.0 | 4689  | 0       | Emergency/Rescue work                                                                                                                                                                                                                     |
| 208 | <a href="#">r7fri4_1</a>    | Knowledge of emergency work in Norway                                                            | discrete | numeric-12.0 | 4689  | 0       | How good is your knowledge of emergency work in Norway?                                                                                                                                                                                   |
| 209 | <a href="#">r7fri4_2</a>    | Knowledge of voluntary emergency organisations                                                   | discrete | numeric-12.0 | 4689  | 0       | How good is your knowledge of the voluntary emergency organisations?                                                                                                                                                                      |
| 210 | <a href="#">r7fri4c_1</a>   | Aware of voluntary emergency organisations: NAK air services                                     | discrete | numeric-12.0 | 4689  | 0       | NAK air services                                                                                                                                                                                                                          |
| 211 | <a href="#">r7fri4c_2</a>   | Aware of voluntary emergency organisations: Norwegian rescue dogs                                | discrete | numeric-12.0 | 4689  | 0       | Norwegian rescue dogs                                                                                                                                                                                                                     |
| 212 | <a href="#">r7fri4c_3</a>   | Aware of voluntary emergency organisations: Norwegian People's Aid First Aid and Rescue services | discrete | numeric-12.0 | 4689  | 0       | Norsk Folkehjelp Sanitet (Norwegian People's Aid First Aid and Rescue services)                                                                                                                                                           |
| 213 | <a href="#">r7fri4c_4</a>   | Aware of voluntary emergency organisations: Norwegian Speleological Society                      | discrete | numeric-12.0 | 4689  | 0       | Norwegian Speleological Society                                                                                                                                                                                                           |
| 214 | <a href="#">r7fri4c_5</a>   | Aware of voluntary emergency organisations: Norwegian Radio Relay League                         | discrete | numeric-12.0 | 4689  | 0       | Norwegian Radio Relay League (amateur radio organisation)                                                                                                                                                                                 |

**File Norsk medborgerpanel - runde 7**

| #   | Name                      | Label                                                                                                                                                          | Type     | Format       | Valid | Invalid | Question                                                                                                                                                    |
|-----|---------------------------|----------------------------------------------------------------------------------------------------------------------------------------------------------------|----------|--------------|-------|---------|-------------------------------------------------------------------------------------------------------------------------------------------------------------|
| 215 | <a href="#">r7fri4c_6</a> | Aware of voluntary emergency organisations: Rovers response group                                                                                              | discrete | numeric-12.0 | 4689  | 0       | Rovernes Beredskapsgruppe (The Norwegian Guide and Scout Association - Rovers response group)                                                               |
| 216 | <a href="#">r7fri4c_7</a> | Aware of voluntary emergency organisations: The Norwegian Red Cross                                                                                            | discrete | numeric-12.0 | 4689  | 0       | The Norwegian Red Cross                                                                                                                                     |
| 217 | <a href="#">r7fri4c_8</a> | Aware of voluntary emergency organisations: The Norwegian Society for Sea Rescue                                                                               | discrete | numeric-12.0 | 4689  | 0       | The Norwegian Society for Sea Rescue                                                                                                                        |
| 218 | <a href="#">r7fri4d</a>   | Member of an organisation which takes part in emergency response work in Norway                                                                                | discrete | numeric-12.0 | 4689  | 0       | Are you a member of an organisation which takes part in the emergency response work in Norway?                                                              |
| 219 | <a href="#">r7fri4e</a>   | Participated as a volunteer in a search and rescue action                                                                                                      | discrete | numeric-12.0 | 4689  | 0       | Have you participated as a volunteer in a search and rescue action?                                                                                         |
| 220 | <a href="#">r7fri4f</a>   | Has assisted the police/ voluntary organisation as a volunteer during an accident                                                                              | discrete | numeric-12.0 | 4689  | 0       | Have you as a volunteer assisted the police or a voluntary organisation during an accident?                                                                 |
| 221 | <a href="#">r7ran38</a>   | [Randomizes if u=1 and R7FRI4d=2. ]                                                                                                                            | discrete | numeric-12.0 | 1004  | 3685    | -                                                                                                                                                           |
| 222 | <a href="#">r7fri4g</a>   | Are you interested in becoming a member of such an organisation? (Members of emergency organisations undergoes courses and must be ready at a moments notice). | discrete | numeric-12.0 | 4689  | 0       | Are you interested in becoming a member of such an organisation?                                                                                            |
| 223 | <a href="#">r7fri4gl</a>  | If no, why not? [anonymized]                                                                                                                                   | discrete | character-52 | 4689  | 0       | If no, why not?                                                                                                                                             |
| 224 | <a href="#">r7fri4h</a>   | Are you interested in becoming a member of an emergency response organisation?                                                                                 | discrete | numeric-12.0 | 4689  | 0       | Are you interested in becoming a member of an emergency response organisation?                                                                              |
| 225 | <a href="#">r7fri4hl</a>  | If no, why not? [anonymized]                                                                                                                                   | discrete | character-53 | 4689  | 0       | If no, why not?                                                                                                                                             |
| 226 | <a href="#">r7fri4i</a>   | Likelihood of participation in search and rescue operation: Asked by the police                                                                                | discrete | numeric-12.0 | 4689  | 0       | If you were asked by the police to participate in a search and rescue operation, how likely is it that you would have participated?                         |
| 227 | <a href="#">r7fri4j</a>   | Likelihood of participation in search and rescue operation: Asked by voluntary organisation                                                                    | discrete | numeric-12.0 | 4689  | 0       | If you were asked by a voluntary organisation to participate in a search and rescue operation, how likely is it that you would have participated?           |
| 228 | <a href="#">r7fri4k</a>   | Likelihood of participation in search and rescue operation: Asked by family/someone you know                                                                   | discrete | numeric-12.0 | 4689  | 0       | If you were asked by your family or someone you know to participate in a search and rescue operation, how likely is it that you would have participated?    |
| 229 | <a href="#">r7fri4l_1</a> | Statement: Voluntary organisation's role in emergency work gets little coverage by the media                                                                   | discrete | numeric-12.0 | 4689  | 0       | The voluntary organisations' role in emergency work gets little coverage by the media.                                                                      |
| 230 | <a href="#">r7fri4l_2</a> | Statement: Important to my participation in rescue work that I personally know the leader/members                                                              | discrete | numeric-12.0 | 4689  | 0       | If I am to participate as a volunteer in rescue work it is important to me that I know the leader or other members of the organisation on a personal basis. |

| File Norsk medborgerpanel - runde 7 |                            |                                                                                                          |          |              |       |         |                                                                                                                                          |
|-------------------------------------|----------------------------|----------------------------------------------------------------------------------------------------------|----------|--------------|-------|---------|------------------------------------------------------------------------------------------------------------------------------------------|
| #                                   | Name                       | Label                                                                                                    | Type     | Format       | Valid | Invalid | Question                                                                                                                                 |
| 231                                 | <a href="#">r7fri4l_3</a>  | Statement: Emergency response work public responsibility limited to public institutions                  | discrete | numeric-12.0 | 4689  | 0       | Emergency response work should be the responsibility of the public authorities and limited to public institutions.                       |
| 232                                 | <a href="#">r7fri4l_4</a>  | Statement: Voluntary organisations should have an important role in emergency response work              | discrete | numeric-12.0 | 4689  | 0       | Voluntary organisations should have an important role in emergency response work in Norway.                                              |
| 233                                 | <a href="#">r7fri4l_5</a>  | Statement: Essential for my participation as a volunteer that employer provides paid leave               | discrete | numeric-12.0 | 4689  | 0       | If I should participate in voluntary rescue work it is essential that the employer provides paid leave during assignments.               |
| 234                                 | <a href="#">r7fri11</a>    | How good is your health?                                                                                 | discrete | numeric-12.0 | 4689  | 0       | Generally speaking, how good is your health?                                                                                             |
| 235                                 | <a href="#">r7fri12</a>    | Do you suffer from health problems expected to last for at least six months?                             | discrete | numeric-12.0 | 4689  | 0       | Do you suffer from any chronic illnesses or health problems that are expected to last for at least six months or more?                   |
| 236                                 | <a href="#">r7fri13</a>    | Has, due to health problems, been prevented from undertaking usual activities during the last six months | discrete | numeric-12.0 | 4689  | 0       | During the last six months have you been prevented due to health problems from undertaking any activities that people usually carry out? |
| 237                                 | <a href="#">r7fri32</a>    | Extent of satisfaction with life at the moment                                                           | discrete | numeric-12.0 | 4689  | 0       | To what extent are you satisfied with life at the moment?                                                                                |
| 238                                 | <a href="#">r7fri33</a>    | To what extent do you think that what you are doing in life is meaningful?                               | discrete | numeric-12.0 | 4689  | 0       | All in all, to what extent do you think that what you are doing in life is meaningful?                                                   |
| 239                                 | <a href="#">r7fri36_1</a>  | How satisfied with: Your standard of living                                                              | discrete | numeric-12.0 | 4689  | 0       | Your standard of living                                                                                                                  |
| 240                                 | <a href="#">r7fri36_2</a>  | How satisfied with: Your health                                                                          | discrete | numeric-12.0 | 4689  | 0       | Your health                                                                                                                              |
| 241                                 | <a href="#">r7fri36_3</a>  | How satisfied with: What you are achieving in life                                                       | discrete | numeric-12.0 | 4689  | 0       | What you are achieving in life                                                                                                           |
| 242                                 | <a href="#">r7fri36_4</a>  | How satisfied with: Personal relationships                                                               | discrete | numeric-12.0 | 4689  | 0       | Your personal relationships                                                                                                              |
| 243                                 | <a href="#">r7fri36_5</a>  | How satisfied with: Feeling secure                                                                       | discrete | numeric-12.0 | 4689  | 0       | How secure you feel                                                                                                                      |
| 244                                 | <a href="#">r7fri36_6</a>  | How satisfied with: The feeling of being part of a neighbourhood community                               | discrete | numeric-12.0 | 4689  | 0       | The feeling of being part of a neighbourhood community                                                                                   |
| 245                                 | <a href="#">r7fri36_7</a>  | How satisfied with: The prospects for security in the future                                             | discrete | numeric-12.0 | 4689  | 0       | The prospects for security in the future                                                                                                 |
| 246                                 | <a href="#">r7fri36_8</a>  | How satisfied with: The amount of time to do things you like doing                                       | discrete | numeric-12.0 | 4689  | 0       | The amount of time you have to do the things you like doing                                                                              |
| 247                                 | <a href="#">r7fri36_9</a>  | How satisfied with: Quality of nature and the environment in local area                                  | discrete | numeric-12.0 | 4689  | 0       | The quality of nature and the environment in your local area                                                                             |
| 248                                 | <a href="#">r7fri36_10</a> | How satisfied with: Your job                                                                             | discrete | numeric-12.0 | 4689  | 0       | Your job                                                                                                                                 |
| 249                                 | <a href="#">r7friend</a>   | Amount of friends                                                                                        | discrete | numeric-12.0 | 4689  | 0       | Approximately how many friends do you have at the moment?                                                                                |

**File Norsk medborgerpanel - runde 7**

| #   | Name                      | Label                                                                                           | Type       | Format       | Valid | Invalid | Question                                                                                                                                                                                                 |
|-----|---------------------------|-------------------------------------------------------------------------------------------------|------------|--------------|-------|---------|----------------------------------------------------------------------------------------------------------------------------------------------------------------------------------------------------------|
| 250 | <a href="#">r7fmet_1</a>  | Are there any people you know personally who: Could help you find a job                         | discrete   | numeric-12.0 | 4689  | 0       | Could help you to find a job, if necessary?                                                                                                                                                              |
| 251 | <a href="#">r7fmet_2</a>  | Are there any people you know personally who: Could lend you a large amount of money            | discrete   | numeric-12.0 | 4689  | 0       | Could lend you a large amount of money (e.g. 20,000 kroner)?                                                                                                                                             |
| 252 | <a href="#">r7fmet_3</a>  | Are there any people you know personally who: Have a high position in business/ public/politics | discrete   | numeric-12.0 | 4689  | 0       | Have a high position in business, public administration or politics?                                                                                                                                     |
| 253 | <a href="#">r7fmet_4</a>  | No such people among those I know personally                                                    | discrete   | numeric-12.0 | 4689  | 0       | There are no such people among the people I know personally                                                                                                                                              |
| 254 | <a href="#">r7fri5</a>    | How often do you travel and stay overnight at least one night?                                  | discrete   | numeric-12.0 | 4689  | 0       | In general, how often do you travel and stay overnight at least one night?                                                                                                                               |
| 255 | <a href="#">r7fri5b</a>   | Has been travelling continuously at least 3 weeks during the last year                          | discrete   | numeric-12.0 | 4689  | 0       | Have you been travelling continuously for at least 3 weeks during the last year?                                                                                                                         |
| 256 | <a href="#">r7fri5c_1</a> | Length of longest lasting travel last year                                                      | continuous | numeric-12.0 | 4689  | 0       | How long was the period of your longest lasting travel during the last year?                                                                                                                             |
| 257 | <a href="#">r7fri6</a>    | Time spent on hobbies and recreational activities a normal week                                 | discrete   | numeric-12.0 | 4689  | 0       | How much time do you spend on hobbies and recreational activities during a normal week?                                                                                                                  |
| 258 | <a href="#">r7fri7_1</a>  | Assists: Relatives not living with you, neighbours/friends/ colleagues                          | discrete   | numeric-12.0 | 4689  | 0       | Relatives not living with you, neighbours, friends or colleagues (for example giving lifts, shopping, gardening, tidying and cleaning, supervision and attention, care or any other type of assistance). |
| 259 | <a href="#">r7fri7_2</a>  | Assists: Someone in your home with special care requirements                                    | discrete   | numeric-12.0 | 4689  | 0       | Someone in your household that have special care requirements (for example assistance due to age, illness or disabilities).                                                                              |
| 260 | <a href="#">r7fri7_3</a>  | Assists: No                                                                                     | discrete   | numeric-12.0 | 4689  | 0       | No                                                                                                                                                                                                       |
| 261 | <a href="#">r7fri7_4</a>  | Assists: Don't know                                                                             | discrete   | numeric-12.0 | 4689  | 0       | Don't know                                                                                                                                                                                               |
| 262 | <a href="#">r7fri7b_1</a> | Provides type of assistance: Visits                                                             | discrete   | numeric-12.0 | 4689  | 0       | Visits, contact                                                                                                                                                                                          |
| 263 | <a href="#">r7fri7b_2</a> | Provides type of assistance: Supervision                                                        | discrete   | numeric-12.0 | 4689  | 0       | Supervision or attention (for example, looking after children, regular telephone calls, other types of attention)                                                                                        |
| 264 | <a href="#">r7fri7b_3</a> | Provides type of assistance: Personal care                                                      | discrete   | numeric-12.0 | 4689  | 0       | Personal care (for example hygiene, assistance with medicines, mobility)                                                                                                                                 |
| 265 | <a href="#">r7fri7b_4</a> | Provides type of assistance: Housework                                                          | discrete   | numeric-12.0 | 4689  | 0       | Housework (for example, washing, cooking, shopping for food)                                                                                                                                             |
| 266 | <a href="#">r7fri7b_5</a> | Provides type of assistance: Administrative                                                     | discrete   | numeric-12.0 | 4689  | 0       | Administrative tasks (for example contact authorities, health care or banking)                                                                                                                           |
| 267 | <a href="#">r7fri7b_6</a> | Provides type of assistance: Transport                                                          | discrete   | numeric-12.0 | 4689  | 0       | Transport (for example giving lifts in your car, collect/deliver to kindergarten/ to school)                                                                                                             |
| 268 | <a href="#">r7fri7b_7</a> | Provides type of assistance: Gardening and the like                                             | discrete   | numeric-12.0 | 4689  | 0       | Gardening, repair work in the home and the like.                                                                                                                                                         |



| File Norsk medborgerpanel - runde 7 |                           |                                                                               |          |              |       |         |                                                                                                                                             |
|-------------------------------------|---------------------------|-------------------------------------------------------------------------------|----------|--------------|-------|---------|---------------------------------------------------------------------------------------------------------------------------------------------|
| #                                   | Name                      | Label                                                                         | Type     | Format       | Valid | Invalid | Question                                                                                                                                    |
| 269                                 | <a href="#">r7fri7b_8</a> | Provides type of assistance:<br>Other                                         | discrete | numeric-12.0 | 4689  | 0       | Other                                                                                                                                       |
| 270                                 | <a href="#">r7fri7b_9</a> | Provides type of assistance:<br>Don't know                                    | discrete | numeric-12.0 | 4689  | 0       | Don't know                                                                                                                                  |
| 271                                 | <a href="#">r7fri7c</a>   | Total time spent assisting<br>during a normal week                            | discrete | numeric-12.0 | 4689  | 0       | How much time in total do you spend<br>doing this during a normal week?                                                                     |
| 272                                 | <a href="#">r7fri7d</a>   | Who do you assist the most?                                                   | discrete | numeric-12.0 | 4689  | 0       | Who do you assist the most?                                                                                                                 |
| 273                                 | <a href="#">r7fr31_1</a>  | How well does description<br>of voluntary work fit:<br>Satisfactorily         | discrete | numeric-12.0 | 4689  | 0       | Satisfactorily                                                                                                                              |
| 274                                 | <a href="#">r7fr31_2</a>  | How well does description<br>of voluntary work fit:<br>Rewarding              | discrete | numeric-12.0 | 4689  | 0       | Rewarding                                                                                                                                   |
| 275                                 | <a href="#">r7fr31_3</a>  | How well does description of<br>voluntary work fit: Exciting                  | discrete | numeric-12.0 | 4689  | 0       | Exciting                                                                                                                                    |
| 276                                 | <a href="#">r7fr31_4</a>  | How well does description of<br>voluntary work fit: Important                 | discrete | numeric-12.0 | 4689  | 0       | Important                                                                                                                                   |
| 277                                 | <a href="#">r7fr31_5</a>  | How well does description of<br>voluntary work fit: Fun                       | discrete | numeric-12.0 | 4689  | 0       | Fun                                                                                                                                         |
| 278                                 | <a href="#">r7fr31_6</a>  | How well does description<br>of voluntary work fit:<br>Challenging            | discrete | numeric-12.0 | 4689  | 0       | Challenging                                                                                                                                 |
| 279                                 | <a href="#">r7fr31_7</a>  | How well does description<br>of voluntary work fit:<br>Disappointing          | discrete | numeric-12.0 | 4689  | 0       | Disappointing                                                                                                                               |
| 280                                 | <a href="#">r7fr31_8</a>  | How well does description<br>of voluntary work fit:<br>Emotionally exhausting | discrete | numeric-12.0 | 4689  | 0       | Emotionally exhausting                                                                                                                      |
| 281                                 | <a href="#">r7fr31_9</a>  | How well does description<br>of voluntary work fit:<br>Physically tiring      | discrete | numeric-12.0 | 4689  | 0       | Physically tiring                                                                                                                           |
| 282                                 | <a href="#">r7fr31_10</a> | How well does description<br>of voluntary work fit:<br>Frustrating            | discrete | numeric-12.0 | 4689  | 0       | Frustrating                                                                                                                                 |
| 283                                 | <a href="#">r7fr31_11</a> | How well does description<br>of voluntary work fit:<br>Depressing             | discrete | numeric-12.0 | 4689  | 0       | Depressing                                                                                                                                  |
| 284                                 | <a href="#">r7fr31_12</a> | How well does description<br>of voluntary work fit: Time<br>consuming         | discrete | numeric-12.0 | 4689  | 0       | Time consuming                                                                                                                              |
| 285                                 | <a href="#">r7fr31_13</a> | How well does description of<br>voluntary work fit: Easy                      | discrete | numeric-12.0 | 4689  | 0       | Easy                                                                                                                                        |
| 286                                 | <a href="#">r7fri14</a>   | Have you participated in<br>any protests the past year to<br>improve society? | discrete | numeric-12.0 | 4689  | 0       | Have you participated in any protests or<br>demonstrations during the past year in<br>an attempt to bring about improvements<br>in society? |
| 287                                 | <a href="#">r7fri15</a>   | Who organised the<br>most recent protest you<br>participated in?              | discrete | numeric-12.0 | 4689  | 0       | If you cast your mind back to the most<br>recent protest or demonstration that you<br>participated in, who was it organised by?             |
| 288                                 | <a href="#">r7fri16</a>   | What type of organisation/<br>union/party was it?                             | discrete | numeric-12.0 | 4689  | 0       | What type of organisation, union or<br>party was it?                                                                                        |

**File Norsk medborgerpanel - runde 7**

| #   | Name                        | Label                                                                                                        | Type     | Format       | Valid | Invalid | Question                                                                                                                  |
|-----|-----------------------------|--------------------------------------------------------------------------------------------------------------|----------|--------------|-------|---------|---------------------------------------------------------------------------------------------------------------------------|
| 289 | <a href="#">r7fri16_..</a>  | What type of organisation/ union/party was it? Other [anonymized]                                            | discrete | character-8  | 4689  | 0       | What type of organisation, union or party was it?                                                                         |
| 290 | <a href="#">r7fri17</a>     | How did you first hear about this protest?                                                                   | discrete | numeric-12.0 | 4689  | 0       | How did you first hear about this protest?                                                                                |
| 291 | <a href="#">r7fri18</a>     | The way you first heard about this protest                                                                   | discrete | numeric-12.0 | 4689  | 0       | In what way did you first hear about this protest?                                                                        |
| 292 | <a href="#">r7km2</a>       | Concern about climate change                                                                                 | discrete | numeric-12.0 | 4689  | 0       | How concerned are you about climate change?                                                                               |
| 293 | <a href="#">r7km3_2</a>     | Positive/negative: Tighten up regulations governing permitted industrial CO2 emissions in Norway and Europe  | discrete | numeric-12.0 | 4689  | 0       | Tighten up the regulations governing the permitted industrial CO2 emissions in Norway and Europe.                         |
| 294 | <a href="#">r7km3_3</a>     | Positive/negative: Storage of CO2 beneath the seabed/ underground                                            | discrete | numeric-12.0 | 4689  | 0       | Strengthen focus on capture and storage of CO2 beneath the seabed or underground.                                         |
| 295 | <a href="#">r7km3_4</a>     | Positive/negative: Increased funding for renewable energy                                                    | discrete | numeric-12.0 | 4689  | 0       | Increase funding for research on and development of renewable energy                                                      |
| 296 | <a href="#">r7km3_5</a>     | Positive/negative: Tighten up fiscal regulations to oil exploration on Norwegian Continental Shelf           | discrete | numeric-12.0 | 4689  | 0       | Tighten up the fiscal regulations which apply to oil exploration on the Norwegian Continental Shelf                       |
| 297 | <a href="#">r7km4</a>       | Discussion about cars, alternative closest to your view                                                      | discrete | numeric-12.0 | 4689  | 0       | Which of the following alternatives is closest to your view?                                                              |
| 298 | <a href="#">r7km4_co_..</a> | Further comments [anonymized]                                                                                | discrete | character-54 | 4689  | 0       | Should you have any further comment you may write it here:                                                                |
| 299 | <a href="#">r7km5_1</a>     | Statement: Technological innovations will resolve the climate problems                                       | discrete | numeric-12.0 | 4689  | 0       | Technological innovations will resolve the climate problems.                                                              |
| 300 | <a href="#">r7km5_2</a>     | Statement: Citizens of rich countries should cut their consumption                                           | discrete | numeric-12.0 | 4689  | 0       | The citizens of rich countries like Norway should cut their consumption as part of the solution to the climate challenge. |
| 301 | <a href="#">r7km6</a>       | To what extent is it possible to prevent harmful climate change, statement closest to your viewpoint         | discrete | numeric-12.0 | 4689  | 0       | Choose the statement that best matches your viewpoint:                                                                    |
| 302 | <a href="#">r7km7_1</a>     | How should your municipal authority prioritise the areas for food production next ten years: Housing         | discrete | numeric-12.0 | 4022  | 667     | Housing                                                                                                                   |
| 303 | <a href="#">r7km7_2</a>     | How should your municipal authority prioritise the areas for food production next ten years: Roads           | discrete | numeric-12.0 | 3838  | 851     | Roads                                                                                                                     |
| 304 | <a href="#">r7km7_3</a>     | How should your municipal authority prioritise the areas for food production next ten years: Food production | discrete | numeric-12.0 | 4253  | 436     | Food production                                                                                                           |
| 305 | <a href="#">r7km7_4</a>     | How should your municipal authority prioritise the areas for food production next ten                        | discrete | numeric-12.0 | 4031  | 658     | Railway/Underground/Tramway etc.                                                                                          |

**File Norsk medborgerpanel - runde 7**

| #   | Name                        | Label                                                                                                            | Type     | Format       | Valid | Invalid | Question                                                                                                                                                                  |
|-----|-----------------------------|------------------------------------------------------------------------------------------------------------------|----------|--------------|-------|---------|---------------------------------------------------------------------------------------------------------------------------------------------------------------------------|
|     |                             | years: Railway/Underground/<br>Tramway                                                                           |          |              |       |         |                                                                                                                                                                           |
| 306 | <a href="#">r7km7_5</a>     | How should your municipal authority prioritise the areas for food production next ten years: Commercial activity | discrete | numeric-12.0 | 3919  | 770     | Commercial activity                                                                                                                                                       |
| 307 | <a href="#">r7km7_6</a>     | How should your municipal authority prioritise the areas for food production next ten years: Public buildings    | discrete | numeric-12.0 | 4103  | 586     | Public buildings: School, sports etc.                                                                                                                                     |
| 308 | <a href="#">r7km8</a>       | Would install solar panels if authorities cover half the cost                                                    | discrete | numeric-12.0 | 4689  | 0       | Would you install solar panels/solar collectors if you could receive a grant from the authorities to cover half the cost?                                                 |
| 309 | <a href="#">r7km8_co_..</a> | Further comments [anonymized]                                                                                    | discrete | character-55 | 4689  | 0       | Should you have any further comment you may write it here:                                                                                                                |
| 310 | <a href="#">r7ran3</a>      | [Randomizes if u=2. ]                                                                                            | discrete | numeric-12.0 | 1182  | 3507    | -                                                                                                                                                                         |
| 311 | <a href="#">r7pilotk_..</a> | Balance between using nature and desire not to harm it                                                           | discrete | numeric-12.0 | 4689  | 0       | Considering the current situation in Norway, how do you feel the balance is today?                                                                                        |
| 312 | <a href="#">r7pilotk_..</a> | How should politicians prioritise between consideration to nature and to society                                 | discrete | numeric-12.0 | 4689  | 0       | How do you feel politicians should prioritise between consideration to nature and to society.                                                                             |
| 313 | <a href="#">r7pilotk_..</a> | How should politicians prioritise between consideration to nature and to society                                 | discrete | numeric-12.0 | 4689  | 0       | How do you feel politicians should prioritise between consideration to nature and to society.                                                                             |
| 314 | <a href="#">r7pilotk_..</a> | Further comments [anonymized]                                                                                    | discrete | character-53 | 4689  | 0       | You can write any comments you might have here:                                                                                                                           |
| 315 | <a href="#">r7ran4</a>      | [Randomizes if u=2. ]                                                                                            | discrete | numeric-12.0 | 1182  | 3507    | -                                                                                                                                                                         |
| 316 | <a href="#">r7pilotk_..</a> | Start oil production or let the oil remain in LoVeSe: Opponent's argument                                        | discrete | numeric-12.0 | 4689  | 0       | What do you think, should we start oil and gas production in the area off Lofoten, Vesterålen and Senja or should we let the oil and gas in this area remain where it is. |
| 317 | <a href="#">r7pilotk_..</a> | Start oil production or let the oil remain in LoVeSe: Proponent's argument                                       | discrete | numeric-12.0 | 4689  | 0       | What do you think, should we start oil and gas production in the area off Lofoten, Vesterålen and Senja or should we let the oil and gas in this area remain where it is. |
| 318 | <a href="#">r7pilotk_..</a> | Start oil production or let the oil remain in LoVeSe: Opponent's argument, then proponent's argument             | discrete | numeric-12.0 | 4689  | 0       | What do you think, should we start oil and gas production in the area off Lofoten, Vesterålen and Senja or should we let the oil and gas in this area remain where it is. |
| 319 | <a href="#">r7pilotk_..</a> | Start oil production or let the oil remain in LoVeSe: Proponent's argument, then opponent's argument             | discrete | numeric-12.0 | 4689  | 0       | What do you think, should we start oil and gas production in the area off Lofoten, Vesterålen and Senja or should we let the oil and gas in this area remain where it is. |
| 320 | <a href="#">r7pilotk_..</a> | Start oil production or let the oil remain in LoVeSe                                                             | discrete | numeric-12.0 | 4689  | 0       | What do you think, should we start oil and gas production in the area off Lofoten, Vesterålen and Senja or should we let the oil and gas in this area remain where it is. |

| File Norsk medborgerpanel - runde 7 |                             |                                                                                                                         |          |              |       |         |                                                                    |
|-------------------------------------|-----------------------------|-------------------------------------------------------------------------------------------------------------------------|----------|--------------|-------|---------|--------------------------------------------------------------------|
| #                                   | Name                        | Label                                                                                                                   | Type     | Format       | Valid | Invalid | Question                                                           |
| 321                                 | <a href="#">r7pilotk_..</a> | Comments [anonymized]                                                                                                   | discrete | character-53 | 4689  | 0       | You can write any comments you might have here:                    |
| 322                                 | <a href="#">r7km10_1</a>    | Which illnesses would you like to be treated with antibiotics: Sinusitis                                                | discrete | numeric-12.0 | 4689  | 0       | Sinusitis                                                          |
| 323                                 | <a href="#">r7km10_2</a>    | Which illnesses would you like to be treated with antibiotics: Bronchitis                                               | discrete | numeric-12.0 | 4689  | 0       | Bronchitis                                                         |
| 324                                 | <a href="#">r7km10_3</a>    | Which illnesses would you like to be treated with antibiotics: The common cold                                          | discrete | numeric-12.0 | 4689  | 0       | The common cold                                                    |
| 325                                 | <a href="#">r7km10_4</a>    | Which illnesses would you like to be treated with antibiotics: Streptococci                                             | discrete | numeric-12.0 | 4689  | 0       | Throat infection (streptococci)                                    |
| 326                                 | <a href="#">r7km10_5</a>    | Which illnesses would you like to be treated with antibiotics: Influenza                                                | discrete | numeric-12.0 | 4689  | 0       | Influenza                                                          |
| 327                                 | <a href="#">r7km10_6</a>    | Which illnesses would you like to be treated with antibiotics: Ear infection                                            | discrete | numeric-12.0 | 4689  | 0       | Ear infection                                                      |
| 328                                 | <a href="#">r7km10_c_..</a> | Comments [anonymized]                                                                                                   | discrete | character-55 | 4689  | 0       | You can write any comments you might have here:                    |
| 329                                 | <a href="#">r7km12_1</a>    | Most important reason for consulting doctor when respiratory infection: Symptoms last longer than expected              | discrete | numeric-12.0 | 4689  | 0       | That the symptoms last longer than I expect                        |
| 330                                 | <a href="#">r7km12_2</a>    | Most important reason for consulting doctor when respiratory infection: Symptoms more severe than expected              | discrete | numeric-12.0 | 4689  | 0       | That the symptoms are much more severe than I expect               |
| 331                                 | <a href="#">r7km12_3</a>    | Most important reason for consulting doctor when respiratory infection: Need a doctor's certificate                     | discrete | numeric-12.0 | 4689  | 0       | That I need a doctor's certificate                                 |
| 332                                 | <a href="#">r7km12_4</a>    | Most important reason for consulting doctor when respiratory infection: Encouraged by others                            | discrete | numeric-12.0 | 4689  | 0       | That others (family, friends) encourage me to visit the doctor     |
| 333                                 | <a href="#">r7km12_5</a>    | Most important reason for consulting doctor when respiratory infection: Others I know with similar symptoms were helped | discrete | numeric-12.0 | 4689  | 0       | That others I know with similar symptoms were helped by the doctor |
| 334                                 | <a href="#">r7km12_6</a>    | Most important reason for consulting doctor when respiratory infection: Other                                           | discrete | numeric-12.0 | 4689  | 0       | Other, note                                                        |
| 335                                 | <a href="#">r7km12_6_..</a> | Most important reason for consulting doctor when respiratory infection: Other [anonymized]                              | discrete | character-53 | 4689  | 0       | Other, note                                                        |
| 336                                 | <a href="#">r7km12_c_..</a> | Comments [anonymized]                                                                                                   | discrete | character-53 | 4689  | 0       | You can write any comments you might have here:                    |

**File Norsk medborgerpanel - runde 7**

| #   | Name                     | Label                                                                                                                          | Type     | Format       | Valid | Invalid | Question                                                                                                               |
|-----|--------------------------|--------------------------------------------------------------------------------------------------------------------------------|----------|--------------|-------|---------|------------------------------------------------------------------------------------------------------------------------|
| 337 | <a href="#">r7dvm1</a>   | Agree/disagree: A rejected adult asylum seeker should be allowed residence if the children are entitled to live in the country | discrete | numeric-12.0 | 4689  | 0       | How much do you agree or disagree that an asylum seeker who has been rejected should be allowed to stay in such cases? |
| 338 | <a href="#">r7ran11</a>  | [Randomizes if u=2. ]                                                                                                          | discrete | numeric-12.0 | 631   | 4058    | -                                                                                                                      |
| 339 | <a href="#">r7dvm2a</a>  | Agree/disagree: Begging should be prohibited in Norway, Austrian Constitutional Court                                          | discrete | numeric-12.0 | 4689  | 0       | To what extent do you agree or disagree that begging should be prohibited in Norway?                                   |
| 340 | <a href="#">r7dvm2b</a>  | Agree/disagree: Begging should be prohibited in Norway, US Federal Court                                                       | discrete | numeric-12.0 | 4689  | 0       | To what extent do you agree or disagree that begging should be prohibited in Norway?                                   |
| 341 | <a href="#">r7dvm2c</a>  | Agree/disagree: Begging should be prohibited in Norway                                                                         | discrete | numeric-12.0 | 4689  | 0       | To what extent do you agree or disagree that begging should be prohibited in Norway?                                   |
| 342 | <a href="#">r7ran12</a>  | [Randomizes if u=2. ]                                                                                                          | discrete | numeric-12.0 | 1179  | 3510    | -                                                                                                                      |
| 343 | <a href="#">r7dv13a</a>  | Would you have signed: Petition against closing local casualty clinic, 1% signed, people you know/respect                      | discrete | numeric-12.0 | 4689  | 0       | Would you have signed the petition?                                                                                    |
| 344 | <a href="#">r7dv13b</a>  | Would you have signed: Petition against closing local casualty clinic, 1% signed, people you don't agree with politically      | discrete | numeric-12.0 | 4689  | 0       | Would you have signed the petition?                                                                                    |
| 345 | <a href="#">r7dv13c</a>  | Would you have signed: Petition against closing local casualty clinic, 10% signed, people you know/respect                     | discrete | numeric-12.0 | 4689  | 0       | Would you have signed the petition?                                                                                    |
| 346 | <a href="#">r7dv13d</a>  | Would you have signed: Petition against closing local casualty clinic, 10% signed, people you don't agree with politically     | discrete | numeric-12.0 | 4689  | 0       | Would you have signed the petition?                                                                                    |
| 347 | <a href="#">r7dv13e</a>  | Would you have signed: Petition against closing local casualty clinic, 30% signed, people you know/respect                     | discrete | numeric-12.0 | 4689  | 0       | Would you have signed the petition?                                                                                    |
| 348 | <a href="#">r7dv13f</a>  | Would you have signed: Petition against closing local casualty clinic, 30% signed, people you don't agree with politically     | discrete | numeric-12.0 | 4689  | 0       | Would you have signed the petition?                                                                                    |
| 349 | <a href="#">r7dv13g</a>  | Would you have signed: Petition against closing local casualty clinic, 1% signed                                               | discrete | numeric-12.0 | 4689  | 0       | Would you have signed the petition?                                                                                    |
| 350 | <a href="#">r7dv13h</a>  | Would you have signed: Petition against closing local casualty clinic, 10% signed                                              | discrete | numeric-12.0 | 4689  | 0       | Would you have signed the petition?                                                                                    |
| 351 | <a href="#">r7dv13i</a>  | Would you have signed: Petition against closing local casualty clinic, 30% signed                                              | discrete | numeric-12.0 | 4689  | 0       | Would you have signed the petition?                                                                                    |
| 352 | <a href="#">r7dv13_2</a> | Probability of such an action succeeding                                                                                       | discrete | numeric-12.0 | 4689  | 0       | How do you assess the probability of such an action succeeding?                                                        |

| File Norsk medborgerpanel - runde 7 |                             |                                                                                                                 |          |              |       |         |                                                                                                                                                 |
|-------------------------------------|-----------------------------|-----------------------------------------------------------------------------------------------------------------|----------|--------------|-------|---------|-------------------------------------------------------------------------------------------------------------------------------------------------|
| #                                   | Name                        | Label                                                                                                           | Type     | Format       | Valid | Invalid | Question                                                                                                                                        |
| 353                                 | <a href="#">r7dv13_3</a>    | Has participated in a petition on the internet                                                                  | discrete | numeric-12.0 | 4689  | 0       | Have you ever participated in a petition on the internet?                                                                                       |
| 354                                 | <a href="#">r7dv13_3b</a>   | What was the last action you participated in about? [anonymized]                                                | discrete | character-52 | 4689  | 0       | What was the last action you participated in about?                                                                                             |
| 355                                 | <a href="#">r7dv13_3c</a>   | What was the action you participated in about? [anonymized]                                                     | discrete | character-52 | 4689  | 0       | What was the action you participated in about?                                                                                                  |
| 356                                 | <a href="#">r7ran6</a>      | [Randomizes if u=2. ]                                                                                           | discrete | numeric-12.0 | 1178  | 3511    | -                                                                                                                                               |
| 357                                 | <a href="#">r7mi5_1</a>     | Agree/disagree: Text books for school should be written, more emphasis on the new cultural diversity            | discrete | numeric-12.0 | 4689  | 0       | Text books for primary and lower secondary school should be written with more emphasis on the new cultural diversity in Norway.                 |
| 358                                 | <a href="#">r7mi5_2</a>     | Agree/disagree: Text books for school should be written, reflect the new cultural diversity                     | discrete | numeric-12.0 | 4689  | 0       | Text books for primary and lower secondary school should be written to reflect the new cultural diversity in Norway.                            |
| 359                                 | <a href="#">r7mi5_3</a>     | Agree/disagree: Text books for school should be written, less emphasis on new ideas about cultural diversity    | discrete | numeric-12.0 | 4689  | 0       | Text books for primary and lower secondary school should be written with less emphasis on new ideas about cultural diversity in Norway.         |
| 360                                 | <a href="#">r7mi5_4</a>     | Agree/disagree: Text books for school should be re-written, more emphasis on the new cultural diversity         | discrete | numeric-12.0 | 4689  | 0       | Text books for primary and lower secondary school should be re-written in order to place more emphasis on the new cultural diversity in Norway. |
| 361                                 | <a href="#">r7mi5_5</a>     | Agree/disagree: Text books for school should be re-written, reflect the new cultural diversity                  | discrete | numeric-12.0 | 4689  | 0       | Text books for primary and lower secondary school should be re-written to reflect the new cultural diversity in Norway.                         |
| 362                                 | <a href="#">r7mi5_6</a>     | Agree/disagree: Text books for school should be re-written, less emphasis on new ideas about cultural diversity | discrete | numeric-12.0 | 4689  | 0       | Text books for primary and lower secondary school should be re-written with less emphasis on new ideas about cultural diversity in Norway.      |
| 363                                 | <a href="#">r7dvby1</a>     | How safe/unsafe do you feel your local area is?                                                                 | discrete | numeric-12.0 | 4689  | 0       | How safe or unsafe do you feel it is?                                                                                                           |
| 364                                 | <a href="#">r7dvby2</a>     | Has your local area become safer/more unsafe/no change last couple of years                                     | discrete | numeric-12.0 | 4689  | 0       | In the last couple of years would you say your local area has become safer, more unsafe or has there been no change to safety?                  |
| 365                                 | <a href="#">r7dv5</a>       | Advantage/disadvantage for Norway that immigrants come to live here?                                            | discrete | numeric-12.0 | 4689  | 0       | In your opinion how great an advantage or disadvantage is it for Norway that immigrants come to live here?                                      |
| 366                                 | <a href="#">r7dv6</a>       | How important is immigration policy to you?                                                                     | discrete | numeric-12.0 | 4689  | 0       | How important is immigration policy to you personally?                                                                                          |
| 367                                 | <a href="#">r7dv7</a>       | Party with the best immigration policy                                                                          | discrete | numeric-12.0 | 4689  | 0       | Which party do you think has the best immigration policy?                                                                                       |
| 368                                 | <a href="#">r7dv7_10...</a> | Party with the best immigration policy, other [anonymized]                                                      | discrete | character-50 | 4689  | 0       | Which party do you think has the best immigration policy?                                                                                       |
| 369                                 | <a href="#">r7ran7</a>      | [Randomizes if u=4. ]                                                                                           | discrete | numeric-12.0 | 1192  | 3497    | -                                                                                                                                               |
| 370                                 | <a href="#">r7dvex1_1</a>   | Should party be prohibited from standing for election:                                                          | discrete | numeric-12.0 | 4689  | 0       | Do you feel that such a party should be prohibited from standing for election?                                                                  |

**File Norsk medborgerpanel - runde 7**

| #   | Name                        | Label                                                                                           | Type     | Format       | Valid | Invalid | Question                                                                                                  |
|-----|-----------------------------|-------------------------------------------------------------------------------------------------|----------|--------------|-------|---------|-----------------------------------------------------------------------------------------------------------|
|     |                             | You disagree with all standpoints                                                               |          |              |       |         |                                                                                                           |
| 371 | <a href="#">r7dvex1_2</a>   | Should party be prohibited from standing for election: Promotes undemocratic values             | discrete | numeric-12.0 | 4689  | 0       | Do you feel that such a party should be prohibited from standing for election?                            |
| 372 | <a href="#">r7dvex1_3</a>   | Should party be prohibited from standing for election: Does not respect democratic ground rules | discrete | numeric-12.0 | 4689  | 0       | Do you feel that such a party should be prohibited from standing for election?                            |
| 373 | <a href="#">r7dvex1_4</a>   | Should party be prohibited from standing for election: Does not respect Norwegian legislation   | discrete | numeric-12.0 | 4689  | 0       | Do you feel that such a party should be prohibited from standing for election?                            |
| 374 | <a href="#">r7dvex1_5</a>   | Should party be prohibited from standing for election: Used violence to achieve its goals       | discrete | numeric-12.0 | 4689  | 0       | Do you feel that such a party should be prohibited from standing for election?                            |
| 375 | <a href="#">r7dvex1_6</a>   | Should party be prohibited from standing for election: Responsible for a terrorist attack       | discrete | numeric-12.0 | 4689  | 0       | Do you feel that such a party should be prohibited from standing for election?                            |
| 376 | <a href="#">r7dvby5</a>     | How often do you spot persons you believe/know to be asylum seekers during a normal week        | discrete | numeric-12.0 | 4689  | 0       | How often do you spot persons you believe or know to be asylum seekers where you go during a normal week? |
| 377 | <a href="#">r7dvby6</a>     | Amount of contact with asylum seekers                                                           | discrete | numeric-12.0 | 4689  | 0       | Would you say that you have had....                                                                       |
| 378 | <a href="#">r7dvby7</a>     | Contact with asylum seekers has been positive/negative                                          | discrete | numeric-12.0 | 4689  | 0       | In general, to what degree have you found the contact you have had to be negative or positive.            |
| 379 | <a href="#">r7dvby8</a>     | Has asylum seekers' centre in local area                                                        | discrete | numeric-12.0 | 4689  | 0       | Do you have an asylum seekers' centre in your local area?                                                 |
| 380 | <a href="#">r7dvby8aja</a>  | When was the asylum seekers' centre established?                                                | discrete | numeric-12.0 | 4689  | 0       | Are you able to estimate when the asylum seekers' centre was established?                                 |
| 381 | <a href="#">r7dvby8bja</a>  | Distance from asylum seekers' centre to where you live                                          | discrete | numeric-12.0 | 4689  | 0       | Approximately what distance is it from the Asylum seekers' centre to where you live?                      |
| 382 | <a href="#">r7dvby8a...</a> | Have you had an asylum seekers' centre in your local area previously?                           | discrete | numeric-12.0 | 4689  | 0       | Have you had an asylum seekers' centre in your local area previously?                                     |
| 383 | <a href="#">r7dvby8a...</a> | When was the asylum seekers' centre closed down?                                                | discrete | numeric-12.0 | 4689  | 0       | Are you able to estimate when the asylum seekers' centre was closed down?                                 |
| 384 | <a href="#">r7dvby8a...</a> | Distance from closed down asylum seekers' centre to where you live                              | discrete | numeric-12.0 | 4689  | 0       | Approximately what distance was it from the Asylum seekers' centre to where you live?                     |
| 385 | <a href="#">r7dvby8a...</a> | Opinion about having asylum seekers' centre in local area                                       | discrete | numeric-12.0 | 4689  | 0       | What is your opinion about having an asylum seekers' centre in your local area?                           |
| 386 | <a href="#">r7dvby8a...</a> | Opinion about getting asylum seekers' centre in local area                                      | discrete | numeric-12.0 | 4689  | 0       | What is your opinion about getting an asylum seekers' centre in your local area?                          |

**File Norsk medborgerpanel - runde 7**

| #   | Name                        | Label                                                                                                          | Type     | Format       | Valid | Invalid | Question                                                                                                                        |
|-----|-----------------------------|----------------------------------------------------------------------------------------------------------------|----------|--------------|-------|---------|---------------------------------------------------------------------------------------------------------------------------------|
| 387 | <a href="#">r7dvby9_1</a>   | Experience of receiving many asylum seekers recently: Said hello                                               | discrete | numeric-12.0 | 4689  | 0       | Said hello to some of the asylum seekers.                                                                                       |
| 388 | <a href="#">r7dvby9_2</a>   | Experience of receiving many asylum seekers recently: Contact via the internet                                 | discrete | numeric-12.0 | 4689  | 0       | Had contact via the internet with asylum seekers (for example Facebook or Finn).                                                |
| 389 | <a href="#">r7dvby9_3</a>   | Experience of receiving many asylum seekers recently: Become friends with some                                 | discrete | numeric-12.0 | 4689  | 0       | Become friends with some of the asylum seekers.                                                                                 |
| 390 | <a href="#">r7dvby9_4</a>   | Experience of receiving many asylum seekers recently: Received assistance                                      | discrete | numeric-12.0 | 4689  | 0       | Received assistance from one or more asylum seekers.                                                                            |
| 391 | <a href="#">r7dvby9_5</a>   | Experience of receiving many asylum seekers recently: Become member of support group                           | discrete | numeric-12.0 | 4689  | 0       | Become a member of a support group for asylum seekers (for example on the net).                                                 |
| 392 | <a href="#">r7dvby9_6</a>   | Experience of receiving many asylum seekers recently: Expressed scepticism                                     | discrete | numeric-12.0 | 4689  | 0       | Expressed scepticism to asylum seekers to others.                                                                               |
| 393 | <a href="#">r7dvby9_7</a>   | Experience of receiving many asylum seekers recently: Avoided as far as possible                               | discrete | numeric-12.0 | 4689  | 0       | Avoided the asylum seekers as far as possible.                                                                                  |
| 394 | <a href="#">r7dvby9_..</a>  | Other experiences [anonymized]                                                                                 | discrete | character-54 | 4689  | 0       | Please write:                                                                                                                   |
| 395 | <a href="#">r7dvby10_1</a>  | Feeling about asylum seekers as a group: Admiration                                                            | discrete | numeric-12.0 | 4689  | 0       | Admiration                                                                                                                      |
| 396 | <a href="#">r7dvby10_2</a>  | Feeling about asylum seekers as a group: Sympathy                                                              | discrete | numeric-12.0 | 4689  | 0       | Sympathy                                                                                                                        |
| 397 | <a href="#">r7dvby10_3</a>  | Feeling about asylum seekers as a group: Anxiety                                                               | discrete | numeric-12.0 | 4689  | 0       | Anxiety                                                                                                                         |
| 398 | <a href="#">r7dvby10_4</a>  | Feeling about asylum seekers as a group: Fear                                                                  | discrete | numeric-12.0 | 4689  | 0       | Fear                                                                                                                            |
| 399 | <a href="#">r7dvby11_1</a>  | To what extent have you imagined what it is like arrive in Norway as an asylum seeker?                         | discrete | numeric-12.0 | 4689  | 0       | To what extent have you thought about or imagined what it is like to arrive in Norway as an asylum seeker?                      |
| 400 | <a href="#">r7padpil_..</a> | For/against: EU-membership                                                                                     | discrete | numeric-12.0 | 4689  | 0       | Firstly: Are you for or against?                                                                                                |
| 401 | <a href="#">r7padpil_..</a> | R7PADPILOT2_ran                                                                                                | discrete | numeric-12.0 | 1082  | 3607    | -                                                                                                                               |
| 402 | <a href="#">r7padpil_..</a> | Should the government act according to result of advisory referendum even if majority in Storting disagree?    | discrete | numeric-12.0 | 4689  | 0       | In such a case the government must act according to the result of the referendum even if the majority in the Storting disagree? |
| 403 | <a href="#">r7dv29_1</a>    | Statement: Begging should be prohibited                                                                        | discrete | numeric-12.0 | 4689  | 0       | Begging should be prohibited in Norway.                                                                                         |
| 404 | <a href="#">r7dv29_2</a>    | Statement: Norwegian Muslims have greater loyalty to other Muslims in the world than to people in this country | discrete | numeric-12.0 | 4689  | 0       | Norwegian Muslims have greater loyalty to other Muslims in the world than to people in this country.                            |



**File Norsk medborgerpanel - runde 7**

| #   | Name                      | Label                                                                                                                       | Type     | Format       | Valid | Invalid | Question                                                                                                                                              |
|-----|---------------------------|-----------------------------------------------------------------------------------------------------------------------------|----------|--------------|-------|---------|-------------------------------------------------------------------------------------------------------------------------------------------------------|
| 405 | <a href="#">r7dv29_3</a>  | Statement: Norway will lose its identity if more Muslims                                                                    | discrete | numeric-12.0 | 4689  | 0       | Norway will end up losing its identity if more Muslims are allowed to live here.                                                                      |
| 406 | <a href="#">r7dv39</a>    | How often do you think/read/talk about something related to 22. July?                                                       | discrete | numeric-12.0 | 4689  | 0       | As for you personally, how often would you say that you now think about, read or talk about something that is related to 22 July?                     |
| 407 | <a href="#">r7dvby3_1</a> | Extent of fear of new terrorist attack in Norway                                                                            | discrete | numeric-12.0 | 4689  | 0       | To what extent do you fear that there will be a new terrorist attack in Norway?                                                                       |
| 408 | <a href="#">r7dvby4</a>   | Danger of terrorist attack become greater/less last couple of years                                                         | discrete | numeric-12.0 | 4689  | 0       | In your experience, has the danger of a terrorist attack become greater or less during the last couple of years, or has there been no change?         |
| 409 | <a href="#">r7pad9_1</a>  | Statement: Can in general rely on the Supreme Court taking the right decisions                                              | discrete | numeric-12.0 | 4689  | 0       | We can in general rely on the Supreme Court of Norway taking the right decisions.                                                                     |
| 410 | <a href="#">r7pad9_2</a>  | Statement: Power of the Supreme Court in controversial cases must be reduced                                                | discrete | numeric-12.0 | 4689  | 0       | The power of the Supreme Court of Norway to decide some types of controversial cases must be reduced.                                                 |
| 411 | <a href="#">r7pad9_3</a>  | Statement: Supreme Court favours some groups                                                                                | discrete | numeric-12.0 | 4689  | 0       | The decisions from the Supreme Court of Norway favour some groups more than others.                                                                   |
| 412 | <a href="#">r7pad9_4</a>  | Statement: Abolish Supreme Court if it makes too many decisions most people disagree with                                   | discrete | numeric-12.0 | 4689  | 0       | If the Supreme Court of Norway starts to make too many decisions most people disagree with, it might be an advantage to abolish the court altogether. |
| 413 | <a href="#">r7ran31</a>   | [Randomizes if u=3. ]                                                                                                       | discrete | numeric-12.0 | 1080  | 3609    | -                                                                                                                                                     |
| 414 | <a href="#">r7pad11a</a>  | Acceptable: Decision, immigrant children of parents that are illegal residents right to remain if parents deported          | discrete | numeric-12.0 | 4689  | 0       | In general, to what extent do you think this would be an acceptable decision by the Supreme Court?                                                    |
| 415 | <a href="#">r7pad11b</a>  | Acceptable: Decision, immigrant children of parents that are illegal residents not right to remain if parents deported      | discrete | numeric-12.0 | 4689  | 0       | In general, to what extent do you think this would be an acceptable decision by the Supreme Court?                                                    |
| 416 | <a href="#">r7pad11c</a>  | Acceptable: Unanimous, immigrant children of parents that are illegal residents right to remain if parents deported         | discrete | numeric-12.0 | 4689  | 0       | In general, to what extent do you think this would be an acceptable decision by the Supreme Court?                                                    |
| 417 | <a href="#">r7pad11d</a>  | Acceptable: Unanimous, immigrant children of parents that are illegal residents not right to remain if parents deported     | discrete | numeric-12.0 | 4689  | 0       | In general, to what extent do you think this would be an acceptable decision by the Supreme Court?                                                    |
| 418 | <a href="#">r7pad11e</a>  | Acceptable: Bare majority, immigrant children of parents that are illegal residents right to remain if parents deported     | discrete | numeric-12.0 | 4689  | 0       | In general, to what extent do you think this would be an acceptable decision by the Supreme Court?                                                    |
| 419 | <a href="#">r7pad11f</a>  | Acceptable: Bare majority, immigrant children of parents that are illegal residents not right to remain if parents deported | discrete | numeric-12.0 | 4689  | 0       | In general, to what extent do you think this would be an acceptable decision by the Supreme Court?                                                    |
| 420 | <a href="#">r7ran32</a>   | [Randomizes if u=3. ]                                                                                                       | discrete | numeric-12.0 | 1080  | 3609    | -                                                                                                                                                     |

**File Norsk medborgerpanel - runde 7**

| #   | Name                     | Label                                                                                                                      | Type     | Format       | Valid | Invalid | Question                                                                                                                                   |
|-----|--------------------------|----------------------------------------------------------------------------------------------------------------------------|----------|--------------|-------|---------|--------------------------------------------------------------------------------------------------------------------------------------------|
| 421 | <a href="#">r7pad12a</a> | Acceptable: Decision, employers allowed to read texts on phones issued by the company                                      | discrete | numeric-12.0 | 4689  | 0       | In general, to what extent do you think this would be an acceptable decision by the Supreme Court?                                         |
| 422 | <a href="#">r7pad12b</a> | Acceptable: Decision, employers not allowed to read texts on phones issued by the company                                  | discrete | numeric-12.0 | 4689  | 0       | In general, to what extent do you think this would be an acceptable decision by the Supreme Court?                                         |
| 423 | <a href="#">r7pad12c</a> | Acceptable: Unanimous, employers allowed to read texts on phones issued by the company                                     | discrete | numeric-12.0 | 4689  | 0       | In general, to what extent do you think this would be an acceptable decision by the Supreme Court?                                         |
| 424 | <a href="#">r7pad12d</a> | Acceptable: Unanimous, employers not allowed to read texts on phones issued by the company                                 | discrete | numeric-12.0 | 4689  | 0       | In general, to what extent do you think this would be an acceptable decision by the Supreme Court?                                         |
| 425 | <a href="#">r7pad12e</a> | Acceptable: Bare majority, employers allowed to read texts on phones issued by the company                                 | discrete | numeric-12.0 | 4689  | 0       | In general, to what extent do you think this would be an acceptable decision by the Supreme Court?                                         |
| 426 | <a href="#">r7pad12f</a> | Acceptable: Bare majority, employers not allowed to read texts on phones issued by the company                             | discrete | numeric-12.0 | 4689  | 0       | In general, to what extent do you think this would be an acceptable decision by the Supreme Court?                                         |
| 427 | <a href="#">r7ran33</a>  | [Randomizes if u=3. ]                                                                                                      | discrete | numeric-12.0 | 1080  | 3609    | -                                                                                                                                          |
| 428 | <a href="#">r7pad13a</a> | Acceptable: Decision, neighbour disputes allowed to go to court before mediation                                           | discrete | numeric-12.0 | 4689  | 0       | In general, to what extent do you think this would be an acceptable decision by the Supreme Court?                                         |
| 429 | <a href="#">r7pad13b</a> | Acceptable: Decision, neighbour disputes not allowed to go to court before mediation                                       | discrete | numeric-12.0 | 4689  | 0       | In general, to what extent do you think this would be an acceptable decision by the Supreme Court?                                         |
| 430 | <a href="#">r7pad13c</a> | Acceptable: Unanimous, neighbour disputes allowed to go to court before mediation                                          | discrete | numeric-12.0 | 4689  | 0       | In general, to what extent do you think this would be an acceptable decision by the Supreme Court?                                         |
| 431 | <a href="#">r7pad13d</a> | Acceptable: Unanimous, neighbour disputes not allowed to go to court before mediation                                      | discrete | numeric-12.0 | 4689  | 0       | In general, to what extent do you think this would be an acceptable decision by the Supreme Court?                                         |
| 432 | <a href="#">r7pad13e</a> | Acceptable: Bare majority, neighbour disputes allowed to go to court before mediation                                      | discrete | numeric-12.0 | 4689  | 0       | In general, to what extent do you think this would be an acceptable decision by the Supreme Court?                                         |
| 433 | <a href="#">r7pad13f</a> | Acceptable: Bare majority, neighbour disputes not allowed to go to court before mediation                                  | discrete | numeric-12.0 | 4689  | 0       | In general, to what extent do you think this would be an acceptable decision by the Supreme Court?                                         |
| 434 | <a href="#">r7ran17</a>  | [Randomizes if u=4. ]                                                                                                      | discrete | numeric-12.0 | 1184  | 3505    | -                                                                                                                                          |
| 435 | <a href="#">r7pad1a</a>  | Agree/disagree: Authorities given leave to detain persons they believe might be potential terrorists, suggested in Britain | discrete | numeric-12.0 | 4689  | 0       | To what extent do you agree or disagree to the authorities being given leave to detain persons they believe might be potential terrorists? |

| File Norsk medborgerpanel - runde 7 |                          |                                                                                                                            |          |              |       |         |                                                                                                                                            |
|-------------------------------------|--------------------------|----------------------------------------------------------------------------------------------------------------------------|----------|--------------|-------|---------|--------------------------------------------------------------------------------------------------------------------------------------------|
| #                                   | Name                     | Label                                                                                                                      | Type     | Format       | Valid | Invalid | Question                                                                                                                                   |
| 436                                 | <a href="#">r7pad1b</a>  | Agree/disagree: Authorities given leave to detain persons they believe might be potential terrorists, suggested in Denmark | discrete | numeric-12.0 | 4689  | 0       | To what extent do you agree or disagree to the authorities being given leave to detain persons they believe might be potential terrorists? |
| 437                                 | <a href="#">r7pad1c</a>  | Agree/disagree: Authorities given leave to detain persons they believe might be potential terrorists, suggested in Germany | discrete | numeric-12.0 | 4689  | 0       | To what extent do you agree or disagree to the authorities being given leave to detain persons they believe might be potential terrorists? |
| 438                                 | <a href="#">r7pad1d</a>  | Agree/disagree: Authorities given leave to detain persons they believe might be potential terrorists, suggested in the USA | discrete | numeric-12.0 | 4689  | 0       | To what extent do you agree or disagree to the authorities being given leave to detain persons they believe might be potential terrorists? |
| 439                                 | <a href="#">r7pad1e</a>  | Agree/disagree: Authorities given leave to detain persons they believe might be potential terrorists                       | discrete | numeric-12.0 | 4689  | 0       | To what extent do you agree or disagree to the authorities being given leave to detain persons they believe might be potential terrorists? |
| 440                                 | <a href="#">r7pad2_1</a> | Done the last year to change society: Boycotted goods                                                                      | discrete | numeric-12.0 | 4689  | 0       | Boycotted goods.                                                                                                                           |
| 441                                 | <a href="#">r7pad2_2</a> | Done the last year to change society: Purchased goods based on ethical/moral reasons                                       | discrete | numeric-12.0 | 4689  | 0       | Purchased specific goods based on ethical, environmental or moral reasons.                                                                 |
| 442                                 | <a href="#">r7pad2_3</a> | Done the last year to change society: Purchased Fairtrade products despite cheaper alternatives                            | discrete | numeric-12.0 | 4689  | 0       | Purchased Fairtrade products even though other cheaper alternatives were available.                                                        |
| 443                                 | <a href="#">r7pad2_4</a> | Done the last year to change society: Purchased organic products despite cheaper alternatives                              | discrete | numeric-12.0 | 4689  | 0       | Chosen organic products even though other cheaper alternatives were available.                                                             |
| 444                                 | <a href="#">r7pad2_5</a> | Done the last year to change society: Reduced/cut the amount of meat in diet                                               | discrete | numeric-12.0 | 4689  | 0       | Reduced or cut the amount of meat in your diet.                                                                                            |
| 445                                 | <a href="#">r7pad2_6</a> | Done the last year to change society: Purchased fewer good than normally                                                   | discrete | numeric-12.0 | 4689  | 0       | Purchased fewer goods than you would as a norm.                                                                                            |
| 446                                 | <a href="#">r7pad2_7</a> | Done the last year to change society: Purchased reusable products instead of new ones                                      | discrete | numeric-12.0 | 4689  | 0       | Purchased reusable products instead of new ones.                                                                                           |
| 447                                 | <a href="#">r7pad2_8</a> | Done the last year to change society: Participated in protest against brand/shop                                           | discrete | numeric-12.0 | 4689  | 0       | Participated in any protest actions against specific brands or shops.                                                                      |
| 448                                 | <a href="#">r7pad2_9</a> | Done the last year to change society: Invested in company with a social profile you support                                | discrete | numeric-12.0 | 4689  | 0       | Made investments in companies that have a social profile that you support.                                                                 |
| 449                                 | <a href="#">r7pad3_1</a> | Statement: Politicians unable to do anything about problems in society, everyone must do their bit                         | discrete | numeric-12.0 | 4689  | 0       | As politicians are unable to do anything about the problems in society, everyone must do their bit.                                        |
| 450                                 | <a href="#">r7pad3_2</a> | Statement: Politicians' responsibility to ensure that our society is sustainable                                           | discrete | numeric-12.0 | 4689  | 0       | It is the politicians' responsibility, not individuals', to ensure that our society is sustainable.                                        |

**File Norsk medborgerpanel - runde 7**

| #   | Name                      | Label                                                                                                                         | Type     | Format       | Valid | Invalid | Question                                                                                                                                                                                     |
|-----|---------------------------|-------------------------------------------------------------------------------------------------------------------------------|----------|--------------|-------|---------|----------------------------------------------------------------------------------------------------------------------------------------------------------------------------------------------|
| 451 | <a href="#">r7pad3_3</a>  | Statement: Conscious decisions in our daily life can alter social development                                                 | discrete | numeric-12.0 | 4689  | 0       | By making conscious decisions in our daily life, it is possible to alter social development.                                                                                                 |
| 452 | <a href="#">r7pad3_4</a>  | Statement: Naive to believe major global challenges for society can be solved by single individuals' life choices             | discrete | numeric-12.0 | 4689  | 0       | It is naive to believe that major global challenges for society can be solved by single individuals' life choices.                                                                           |
| 453 | <a href="#">r7ran8</a>    | [Randomizes if u=4. ]                                                                                                         | discrete | numeric-12.0 | 1176  | 3513    | -                                                                                                                                                                                            |
| 454 | <a href="#">r7dvex2_1</a> | Should party be banned: Abolish all production of oil                                                                         | discrete | numeric-12.0 | 4689  | 0       | In your opinion, should such a party be banned?                                                                                                                                              |
| 455 | <a href="#">r7dvex2_2</a> | Should party be banned: Abolish free and fair elections                                                                       | discrete | numeric-12.0 | 4689  | 0       | In your opinion, should such a party be banned?                                                                                                                                              |
| 456 | <a href="#">r7dvex2_3</a> | Should party be banned: Abolish freedom of the press                                                                          | discrete | numeric-12.0 | 4689  | 0       | In your opinion, should such a party be banned?                                                                                                                                              |
| 457 | <a href="#">r7dvex2_4</a> | Should party be banned: Abolish endorsement of the Convention on Human Rights                                                 | discrete | numeric-12.0 | 4689  | 0       | In your opinion, should such a party be banned?                                                                                                                                              |
| 458 | <a href="#">r7dvex2_5</a> | Should party be banned: Abolish the rights of minorities                                                                      | discrete | numeric-12.0 | 4689  | 0       | In your opinion, should such a party be banned?                                                                                                                                              |
| 459 | <a href="#">r7ran9</a>    | [Randomizes if u=4. ]                                                                                                         | discrete | numeric-12.0 | 1176  | 3513    | -                                                                                                                                                                                            |
| 460 | <a href="#">r7dvg_1</a>   | Statement: Believable that those who state sexual orientation as reason they are seeking asylum are telling the truth         | discrete | numeric-12.0 | 4689  | 0       | There is reason to believe that most of those who state sexual orientation as the reason they have left their home country and are seeking asylum in Norway are telling the truth.           |
| 461 | <a href="#">r7dvg_2</a>   | Statement: Believable that the reason to seek asylum is true                                                                  | discrete | numeric-12.0 | 4689  | 0       | There is reason to believe that most of those who state the reason they have left their home country and are seeking asylum in Norway are telling the truth.                                 |
| 462 | <a href="#">r7dvg_3</a>   | Statement: Believable that those who state conversion to new religion as reason they are seeking asylum are telling the truth | discrete | numeric-12.0 | 4689  | 0       | There is reason to believe that most of those who state conversion to a new religion as the reason they have left their home country and are seeking asylum in Norway are telling the truth. |
| 463 | <a href="#">r7dvg_4</a>   | Statement: Believable that the asylum seekers who state that they are minors are telling the truth                            | discrete | numeric-12.0 | 4689  | 0       | There is reason to believe that most of those who state that they are minors when seeking asylum in Norway are telling the truth.                                                            |
| 464 | <a href="#">r7ran10</a>   | [Randomizes if u=4. ]                                                                                                         | discrete | numeric-12.0 | 1175  | 3514    | -                                                                                                                                                                                            |
| 465 | <a href="#">r7dvkost1</a> | How large cost/benefit is immigration to the welfare state?                                                                   | discrete | numeric-12.0 | 4689  | 0       | How large would you say the cost or benefit of immigration is to the Norwegian welfare state?                                                                                                |
| 466 | <a href="#">r7dvkost2</a> | How large cost/benefit is immigration to the welfare state? Unemployment rate 7%                                              | discrete | numeric-12.0 | 4689  | 0       | Taking this into account, how large would you say the cost or benefit of immigration is to the Norwegian welfare state?                                                                      |
| 467 | <a href="#">r7dvkost3</a> | How large cost/benefit is immigration to the welfare state? Employment rate 60%                                               | discrete | numeric-12.0 | 4689  | 0       | Taking this into account, how large would you say the cost or benefit of immigration is to the Norwegian welfare state?                                                                      |

**File Norsk medborgerpanel - runde 7**

| #   | Name                        | Label                                                                                        | Type     | Format       | Valid | Invalid | Question                                                                                                                |
|-----|-----------------------------|----------------------------------------------------------------------------------------------|----------|--------------|-------|---------|-------------------------------------------------------------------------------------------------------------------------|
| 468 | <a href="#">r7dvcost4</a>   | How large cost/benefit is immigration to the welfare state? Expense                          | discrete | numeric-12.0 | 4689  | 0       | Taking this into account, how large would you say the cost or benefit of immigration is to the Norwegian welfare state? |
| 469 | <a href="#">r7dvcost5</a>   | How large cost/benefit is immigration to the welfare state? Income                           | discrete | numeric-12.0 | 4689  | 0       | Taking this into account, how large would you say the cost or benefit of immigration is to the Norwegian welfare state? |
| 470 | <a href="#">r7dvcost6</a>   | How large cost/benefit is immigration to the welfare state? Unemployment rate 7%, expense    | discrete | numeric-12.0 | 4689  | 0       | Taking this into account, how large would you say the cost or benefit of immigration is to the Norwegian welfare state? |
| 471 | <a href="#">r7dvcost7</a>   | How large cost/benefit is immigration to the welfare state? Employment rate 60%, income      | discrete | numeric-12.0 | 4689  | 0       | Taking this into account, how large would you say the cost or benefit of immigration is to the Norwegian welfare state? |
| 472 | <a href="#">r7dvinn</a>     | How mild/strict should Norway's immigration politics be?                                     | discrete | numeric-12.0 | 4689  | 0       | How mild or strict should Norway's immigration politics be?                                                             |
| 473 | <a href="#">r7nfc_1</a>     | Statement: Prefers complicated rather than easy tasks                                        | discrete | numeric-12.0 | 4689  | 0       | I prefer complicated rather than easy tasks                                                                             |
| 474 | <a href="#">r7nfc_2</a>     | Statement: Likes tasks where you come up with new solutions                                  | discrete | numeric-12.0 | 4689  | 0       | I really like tasks where the idea is to come up with new solutions.                                                    |
| 475 | <a href="#">r7nfc_3</a>     | Statement: Would prefer a task that is intellectual rather than one needing little thought   | discrete | numeric-12.0 | 4689  | 0       | I would prefer a task that is intellectual and complex rather than one that needs little thought.                       |
| 476 | <a href="#">r7nte_1</a>     | Statement: Opinion about most things                                                         | discrete | numeric-12.0 | 4689  | 0       | I have an opinion about most things                                                                                     |
| 477 | <a href="#">r7nte_2</a>     | Statement: Important to have a view on whether something is right/wrong                      | discrete | numeric-12.0 | 4689  | 0       | I think it is important to have a view on whether something is right or wrong                                           |
| 478 | <a href="#">r7k13</a>       | How often do you discuss politics with others?                                               | discrete | numeric-12.0 | 4689  | 0       | How often would you say that you discuss politics with others?                                                          |
| 479 | <a href="#">r7k33</a>       | Which description best applies to what you have been doing the last week?                    | discrete | numeric-12.0 | 4689  | 0       | Which of the following descriptions best applies to what you have been doing for the last 7 days.                       |
| 480 | <a href="#">r7k33_9_...</a> | Which description best applies to what you have been doing the last week? Other [anonymized] | discrete | character-48 | 4689  | 0       | Which of the following descriptions best applies to what you have been doing for the last 7 days.                       |
| 481 | <a href="#">r7k34_1</a>     | What industry do you work in: Public central administration                                  | discrete | numeric-12.0 | 4689  | 0       | What industry do you (your company) work in?                                                                            |
| 482 | <a href="#">r7k34_2</a>     | What industry do you work in: Kindergarten/school/teaching                                   | discrete | numeric-12.0 | 4689  | 0       | What industry do you (your company) work in?                                                                            |
| 483 | <a href="#">r7k34_3</a>     | What industry do you work in: Health services                                                | discrete | numeric-12.0 | 4689  | 0       | What industry do you (your company) work in?                                                                            |
| 484 | <a href="#">r7k34_4</a>     | What industry do you work in: Social services/child protection                               | discrete | numeric-12.0 | 4689  | 0       | What industry do you (your company) work in?                                                                            |

**File Norsk medborgerpanel - runde 7**

| #   | Name                       | Label                                                                                                    | Type     | Format       | Valid | Invalid | Question                                                                                                                                                               |
|-----|----------------------------|----------------------------------------------------------------------------------------------------------|----------|--------------|-------|---------|------------------------------------------------------------------------------------------------------------------------------------------------------------------------|
| 485 | <a href="#">r7k34_5</a>    | What industry do you work in: Nursing and care services                                                  | discrete | numeric-12.0 | 4689  | 0       | What industry do you (your company) work in?                                                                                                                           |
| 486 | <a href="#">r7k34_6</a>    | What industry do you work in: Defence/police/judicial system/security                                    | discrete | numeric-12.0 | 4689  | 0       | What industry do you (your company) work in?                                                                                                                           |
| 487 | <a href="#">r7k34_7</a>    | What industry do you work in: Agriculture/forestry/fishing                                               | discrete | numeric-12.0 | 4689  | 0       | What industry do you (your company) work in?                                                                                                                           |
| 488 | <a href="#">r7k34_8</a>    | What industry do you work in: Industry/technology                                                        | discrete | numeric-12.0 | 4689  | 0       | What industry do you (your company) work in?                                                                                                                           |
| 489 | <a href="#">r7k34_9</a>    | What industry do you work in: Building/construction                                                      | discrete | numeric-12.0 | 4689  | 0       | What industry do you (your company) work in?                                                                                                                           |
| 490 | <a href="#">r7k34_10</a>   | What industry do you work in: Retailing/shop                                                             | discrete | numeric-12.0 | 4689  | 0       | What industry do you (your company) work in?                                                                                                                           |
| 491 | <a href="#">r7k34_11</a>   | What industry do you work in: Transport/communications                                                   | discrete | numeric-12.0 | 4689  | 0       | What industry do you (your company) work in?                                                                                                                           |
| 492 | <a href="#">r7k34_12</a>   | What industry do you work in: Culture/sport/organisations                                                | discrete | numeric-12.0 | 4689  | 0       | What industry do you (your company) work in?                                                                                                                           |
| 493 | <a href="#">r7k34_13</a>   | What industry do you work in: Media/advertising                                                          | discrete | numeric-12.0 | 4689  | 0       | What industry do you (your company) work in?                                                                                                                           |
| 494 | <a href="#">r7k34_14</a>   | What industry do you work in: Research/analysis                                                          | discrete | numeric-12.0 | 4689  | 0       | What industry do you (your company) work in?                                                                                                                           |
| 495 | <a href="#">r7k34_15</a>   | What industry do you work in: Travel/hotels                                                              | discrete | numeric-12.0 | 4689  | 0       | What industry do you (your company) work in?                                                                                                                           |
| 496 | <a href="#">r7k34_16</a>   | What industry do you work in: Restaurants/catering                                                       | discrete | numeric-12.0 | 4689  | 0       | What industry do you (your company) work in?                                                                                                                           |
| 497 | <a href="#">r7k34_17</a>   | What industry do you work in: Telecommunications/IT                                                      | discrete | numeric-12.0 | 4689  | 0       | What industry do you (your company) work in?                                                                                                                           |
| 498 | <a href="#">r7k34_18</a>   | What industry do you work in: Banking/insurance/finance                                                  | discrete | numeric-12.0 | 4689  | 0       | What industry do you (your company) work in?                                                                                                                           |
| 499 | <a href="#">r7k34_19</a>   | What industry do you work in: Commercial services                                                        | discrete | numeric-12.0 | 4689  | 0       | What industry do you (your company) work in?                                                                                                                           |
| 500 | <a href="#">r7k34_20</a>   | What industry do you work in: Oil/gas                                                                    | discrete | numeric-12.0 | 4689  | 0       | What industry do you (your company) work in?                                                                                                                           |
| 501 | <a href="#">r7k34_21</a>   | What industry do you work in: Other                                                                      | discrete | numeric-12.0 | 4689  | 0       | What industry do you (your company) work in?                                                                                                                           |
| 502 | <a href="#">r7k34_21_.</a> | What industry do you work in: Other [anonymized]                                                         | discrete | character-51 | 4689  | 0       | What industry do you (your company) work in?                                                                                                                           |
| 503 | <a href="#">r7k35</a>      | Which description best fits the area you live in?                                                        | discrete | numeric-12.0 | 4689  | 0       | Which description best fits the area you live in?                                                                                                                      |
| 504 | <a href="#">r7ran24</a>    | [All respondents are randomized. ]                                                                       | discrete | numeric-12.0 | 4581  | 108     | -                                                                                                                                                                      |
| 505 | <a href="#">r7ran24_1</a>  | [Randomizes if ran24=1. ]                                                                                | discrete | numeric-12.0 | 789   | 3900    | -                                                                                                                                                                      |
| 506 | <a href="#">ocr7matc1</a>  | Agree with how many of these three statements:<br>Increase assistance to the poor, decrease tax on fuel, | discrete | numeric-12.0 | 4689  | 0       | Norway should increase in assistance to the poor Norway should decrease the tax on petrol and diesel Norway should allow large corporations to pollute the environment |

| File Norsk medborgerpanel - runde 7 |                            |                                                                                                                                                                                               |          |              |       |         |                                                                                                                                                                                                                                                         |
|-------------------------------------|----------------------------|-----------------------------------------------------------------------------------------------------------------------------------------------------------------------------------------------|----------|--------------|-------|---------|---------------------------------------------------------------------------------------------------------------------------------------------------------------------------------------------------------------------------------------------------------|
| #                                   | Name                       | Label                                                                                                                                                                                         | Type     | Format       | Valid | Invalid | Question                                                                                                                                                                                                                                                |
|                                     |                            | allow large corporations to pollute                                                                                                                                                           |          |              |       |         |                                                                                                                                                                                                                                                         |
| 507                                 | <a href="#">ocr7matc1a</a> | Should Norway allow people from Muslim countries to come and live here?                                                                                                                       | discrete | numeric-12.0 | 4689  | 0       | Do you think Norway should allow people from Muslim countries to come and live here?                                                                                                                                                                    |
| 508                                 | <a href="#">ocr7matc2</a>  | Agree with how many of these three statements:<br>Increase assistance to the poor, decrease tax on fuel, allow large corporations to pollute                                                  | discrete | numeric-12.0 | 4689  | 0       | Norway should increase in assistance to the poor Norway should decrease the tax on petrol and diesel Norway should allow large corporations to pollute the environment                                                                                  |
| 509                                 | <a href="#">ocr7matc2a</a> | Should Norway allow people from Eastern European countries to come and live here?                                                                                                             | discrete | numeric-12.0 | 4689  | 0       | Do you think Norway should allow people from Eastern European countries to come and live here?                                                                                                                                                          |
| 510                                 | <a href="#">ocr7matc3</a>  | Agree with how many of these three statements:<br>Increase assistance to the poor, decrease tax on fuel, allow large corporations to pollute                                                  | discrete | numeric-12.0 | 4689  | 0       | Norway should increase in assistance to the poor Norway should decrease the tax on petrol and diesel Norway should allow large corporations to pollute the environment                                                                                  |
| 511                                 | <a href="#">ocr7matc3a</a> | Should Norway allow immigrants from Muslim countries to come and live here?                                                                                                                   | discrete | numeric-12.0 | 4689  | 0       | Do you think Norway should allow immigrants from Muslim countries to come and live here?                                                                                                                                                                |
| 512                                 | <a href="#">ocr7matc4</a>  | Agree with how many of these three statements:<br>Increase assistance to the poor, decrease tax on fuel, allow large corporations to pollute                                                  | discrete | numeric-12.0 | 4689  | 0       | Norway should increase in assistance to the poor Norway should decrease the tax on petrol and diesel Norway should allow large corporations to pollute the environment                                                                                  |
| 513                                 | <a href="#">ocr7matc4a</a> | Should Norway allow refugees from Muslim countries to come and live here?                                                                                                                     | discrete | numeric-12.0 | 4689  | 0       | Do you think Norway should allow refugees from Muslim countries to come and live here?                                                                                                                                                                  |
| 514                                 | <a href="#">ocr7matt1</a>  | Agree with how many of these four statements:<br>Increase assistance to the poor, decrease tax on fuel, allow large corporations to pollute, people from Muslim countries live here           | discrete | numeric-12.0 | 4689  | 0       | Norway should increase in assistance to the poor Norway should decrease the tax on petrol and diesel Norway should allow large corporations to pollute the environment Norway should allow people from Muslim countries to come and live here           |
| 515                                 | <a href="#">ocr7matt2</a>  | Agree with how many of these four statements:<br>Increase assistance to the poor, decrease tax on fuel, allow large corporations to pollute, people from Eastern European countries live here | discrete | numeric-12.0 | 4689  | 0       | Norway should increase in assistance to the poor Norway should decrease the tax on petrol and diesel Norway should allow large corporations to pollute the environment Norway should allow people from Eastern European countries to come and live here |
| 516                                 | <a href="#">ocr7matt3</a>  | Agree with how many of these four statements:<br>Increase assistance to the poor, decrease tax on fuel, allow large corporations to pollute, immigrants from Muslim countries live here       | discrete | numeric-12.0 | 4689  | 0       | Norway should increase in assistance to the poor Norway should decrease the tax on petrol and diesel Norway should allow large corporations to pollute the environment Norway should allow immigrants from Muslim countries to come and live here       |
| 517                                 | <a href="#">ocr7matt4</a>  | Agree with how many of these four statements:<br>Increase assistance to the                                                                                                                   | discrete | numeric-12.0 | 4689  | 0       | Norway should increase in assistance to the poor Norway should decrease the tax on petrol and diesel Norway should                                                                                                                                      |



**File Norsk medborgerpanel - runde 7**

| #   | Name                       | Label                                                                                                               | Type     | Format       | Valid | Invalid | Question                                                                                                                     |
|-----|----------------------------|---------------------------------------------------------------------------------------------------------------------|----------|--------------|-------|---------|------------------------------------------------------------------------------------------------------------------------------|
|     |                            | poor, decrease tax on fuel, allow large corporations to pollute, refugees from Muslim countries live here           |          |              |       |         | allow large corporations to pollute the environment Norway should allow refugees from Muslim countries to come and live here |
| 518 | <a href="#">r7ran25</a>    | [Randomizes if u=3]                                                                                                 | discrete | numeric-12.0 | 1078  | 3611    | -                                                                                                                            |
| 519 | <a href="#">r7ran26</a>    | [Randomizes if u=3]                                                                                                 | discrete | numeric-12.0 | 1078  | 3611    | -                                                                                                                            |
| 520 | <a href="#">r7ran27</a>    | [Randomizes if u=3]                                                                                                 | discrete | numeric-12.0 | 1078  | 3611    | -                                                                                                                            |
| 521 | <a href="#">r7ran28</a>    | [Randomizes if u=3]                                                                                                 | discrete | numeric-12.0 | 1078  | 3611    | -                                                                                                                            |
| 522 | <a href="#">r7ran29</a>    | [Randomizes if u=3]                                                                                                 | discrete | numeric-12.0 | 1078  | 3611    | -                                                                                                                            |
| 523 | <a href="#">r7ran30</a>    | [Randomizes if u=3]                                                                                                 | discrete | numeric-12.0 | 1078  | 3611    | -                                                                                                                            |
| 524 | <a href="#">ocr7mari..</a> | Appropriate to investigate Gazprom                                                                                  | discrete | numeric-12.0 | 4689  | 0       | In your opinion, is this investigation into the Russian energy giant Gazprom appropriate?                                    |
| 525 | <a href="#">ocr7mari..</a> | Appropriate to investigate Gazprom: Put the business under pressure                                                 | discrete | numeric-12.0 | 4689  | 0       | In your opinion, is this investigation into the Russian energy giant Gazprom appropriate?                                    |
| 526 | <a href="#">ocr7mari..</a> | Appropriate to investigate Gazprom: Put the business under pressure according to Gazprom/Russian media              | discrete | numeric-12.0 | 4689  | 0       | In your opinion, is this investigation into the Russian energy giant Gazprom appropriate?                                    |
| 527 | <a href="#">ocr7mari..</a> | Appropriate to investigate Gazprom: Unfair prices for Eastern European countries                                    | discrete | numeric-12.0 | 4689  | 0       | In your opinion, is this investigation into the Russian energy giant Gazprom appropriate?                                    |
| 528 | <a href="#">ocr7mari..</a> | Appropriate to investigate Gazprom: Unfair prices for Eastern European countries according to antitrust authorities | discrete | numeric-12.0 | 4689  | 0       | In your opinion, is this investigation into the Russian energy giant Gazprom appropriate?                                    |
| 529 | <a href="#">ocr7mari..</a> | Rating larger military presence Eastern Europe                                                                      | discrete | numeric-12.0 | 4689  | 0       | How would you rate the larger NATO military presence in Eastern Europe?                                                      |
| 530 | <a href="#">ocr7mari..</a> | Rating larger military presence Eastern Europe: May escalate small incidents                                        | discrete | numeric-12.0 | 4689  | 0       | How would you rate the larger NATO military presence in Eastern Europe?                                                      |
| 531 | <a href="#">ocr7mari..</a> | Rating larger military presence Eastern Europe: May escalate small incidents, pointed out by Russian experts        | discrete | numeric-12.0 | 4689  | 0       | How would you rate the larger NATO military presence in Eastern Europe?                                                      |
| 532 | <a href="#">ocr7mari..</a> | Rating larger military presence Eastern Europe: Designed to support NATO allies                                     | discrete | numeric-12.0 | 4689  | 0       | How would you rate the larger NATO military presence in Eastern Europe?                                                      |
| 533 | <a href="#">ocr7mari..</a> | Rating larger military presence Eastern Europe: Designed to support NATO allies, pointed out by US State Department | discrete | numeric-12.0 | 4689  | 0       | How would you rate the larger NATO military presence in Eastern Europe?                                                      |
| 534 | <a href="#">ocr7mari..</a> | Evaluation of protests that led to the resignation of Yanukovich                                                    | discrete | numeric-12.0 | 4689  | 0       | How would you evaluate the protests that led to the resignation of President Yanukovich?                                     |
| 535 | <a href="#">ocr7mari..</a> | Evaluation of protests that led to the resignation of Yanukovich: Coup                                              | discrete | numeric-12.0 | 4689  | 0       | How would you evaluate the protests that led to the resignation of President Yanukovich?                                     |



| File Norsk medborgerpanel - runde 7 |                             |                                                                                                                                                                                                       |          |              |       |         |                                                                                                              |
|-------------------------------------|-----------------------------|-------------------------------------------------------------------------------------------------------------------------------------------------------------------------------------------------------|----------|--------------|-------|---------|--------------------------------------------------------------------------------------------------------------|
| #                                   | Name                        | Label                                                                                                                                                                                                 | Type     | Format       | Valid | Invalid | Question                                                                                                     |
|                                     |                             | to expand the sphere of influence of the West                                                                                                                                                         |          |              |       |         |                                                                                                              |
| 536                                 | <a href="#">ocr7mari ..</a> | Evaluation of protests that led to the resignation of Yanukovych: Coup to expand the sphere of influence of the West, according to Russian leadership                                                 | discrete | numeric-12.0 | 4689  | 0       | How would you evaluate the protests that led to the resignation of President Yanukovych?                     |
| 537                                 | <a href="#">ocr7mari ..</a> | Evaluation of protests that led to the resignation of Yanukovych: Undertaken by the Ukrainian people, led to free elections and opened a European perspective                                         | discrete | numeric-12.0 | 4689  | 0       | How would you evaluate the protests that led to the resignation of President Yanukovych?                     |
| 538                                 | <a href="#">ocr7mari ..</a> | Evaluation of protests that led to the resignation of Yanukovych: Undertaken by the Ukrainian people, led to free elections and opened a European perspective, noted by Norwegian/Western politicians | discrete | numeric-12.0 | 4689  | 0       | How would you evaluate the protests that led to the resignation of President Yanukovych?                     |
| 539                                 | <a href="#">ocr7mari ..</a> | Reliability commitment of NATO to assist Turkey                                                                                                                                                       | discrete | numeric-12.0 | 4689  | 0       | How reliable do you think is the commitment of NATO to assist Turkey?                                        |
| 540                                 | <a href="#">ocr7mari ..</a> | Reliability commitment of NATO to assist Turkey: Could hesitate because of Erdogans policies                                                                                                          | discrete | numeric-12.0 | 4689  | 0       | How reliable do you think is the commitment of NATO to assist Turkey?                                        |
| 541                                 | <a href="#">ocr7mari ..</a> | Reliability commitment of NATO to assist Turkey: Could hesitate because of Erdogans policies, argued by Russian government                                                                            | discrete | numeric-12.0 | 4689  | 0       | How reliable do you think is the commitment of NATO to assist Turkey?                                        |
| 542                                 | <a href="#">ocr7mari ..</a> | Reliability commitment of NATO to assist Turkey: Alliance never neglected its obligations                                                                                                             | discrete | numeric-12.0 | 4689  | 0       | How reliable do you think is the commitment of NATO to assist Turkey?                                        |
| 543                                 | <a href="#">ocr7mari ..</a> | Reliability commitment of NATO to assist Turkey: Alliance never neglected its obligations, pointed out by NATO officials                                                                              | discrete | numeric-12.0 | 4689  | 0       | How reliable do you think is the commitment of NATO to assist Turkey?                                        |
| 544                                 | <a href="#">ocr7mari ..</a> | How often does media in Norway self-censor so as not to cast migrants in a bad light                                                                                                                  | discrete | numeric-12.0 | 4689  | 0       | How often do you think media in Norway self-censors its reporting so as not to cast migrants in a bad light? |
| 545                                 | <a href="#">ocr7mari ..</a> | How often does media in Norway self-censor so as not to cast migrants in a bad light: Can be accused of racism, press-freedom has suffered                                                            | discrete | numeric-12.0 | 4689  | 0       | How often do you think media in Norway self-censors its reporting so as not to cast migrants in a bad light? |
| 546                                 | <a href="#">ocr7mari ..</a> | How often does media in Norway self-censor so as not to cast migrants in a bad light: Can be accused of racism, press-freedom                                                                         | discrete | numeric-12.0 | 4689  | 0       | How often do you think media in Norway self-censors its reporting so as not to cast migrants in a bad light? |

**File Norsk medborgerpanel - runde 7**

| #   | Name                        | Label                                                                                                                                          | Type     | Format       | Valid | Invalid | Question                                                                                                                                                                                 |
|-----|-----------------------------|------------------------------------------------------------------------------------------------------------------------------------------------|----------|--------------|-------|---------|------------------------------------------------------------------------------------------------------------------------------------------------------------------------------------------|
|     |                             | has suffered, suggested by Sputnik                                                                                                             |          |              |       |         |                                                                                                                                                                                          |
| 547 | <a href="#">ocr7mari ..</a> | How often does media in Norway self-censor so as not to cast migrants in a bad light: NRK offered an honest look                               | discrete | numeric-12.0 | 4689  | 0       | How often do you think media in Norway self-censors its reporting so as not to cast migrants in a bad light?                                                                             |
| 548 | <a href="#">ocr7mari ..</a> | How often does media in Norway self-censor so as not to cast migrants in a bad light: NRK offered an honest look, pointed out by media experts | discrete | numeric-12.0 | 4689  | 0       | How often do you think media in Norway self-censors its reporting so as not to cast migrants in a bad light?                                                                             |
| 549 | <a href="#">ocr7mari ..</a> | How justified is an increase in military spending                                                                                              | discrete | numeric-12.0 | 4689  | 0       | In your view, how justified is such a big increase in military spending?                                                                                                                 |
| 550 | <a href="#">ocr7mari ..</a> | How justified is an increase in military spending: May provoke a russian troop buildup                                                         | discrete | numeric-12.0 | 4689  | 0       | In your view, how justified is such a big increase in military spending?                                                                                                                 |
| 551 | <a href="#">ocr7mari ..</a> | How justified is an increase in military spending: May provoke a russian troop buildup, warned by Lavrov                                       | discrete | numeric-12.0 | 4689  | 0       | In your view, how justified is such a big increase in military spending?                                                                                                                 |
| 552 | <a href="#">ocr7mari ..</a> | How justified is an increase in military spending: Necessary response to the Baltic Sea region                                                 | discrete | numeric-12.0 | 4689  | 0       | In your view, how justified is such a big increase in military spending?                                                                                                                 |
| 553 | <a href="#">ocr7mari ..</a> | How justified is an increase in military spending: Necessary response to the Baltic Sea region, argued by Norwegian security experts           | discrete | numeric-12.0 | 4689  | 0       | In your view, how justified is such a big increase in military spending?                                                                                                                 |
| 554 | <a href="#">r7random ..</a> | randomizedBlockOrder                                                                                                                           | discrete | character-17 | 4689  | 0       | -                                                                                                                                                                                        |
| 555 | <a href="#">r7ocrecs ..</a> | R7OCRECSM_mobile2                                                                                                                              | discrete | numeric-12.0 | 1176  | 3513    | -                                                                                                                                                                                        |
| 556 | <a href="#">r7ocrecs ..</a> | How important is good education in deciding whether someone could come and live here?                                                          | discrete | numeric-12.0 | 4689  | 0       | How important do you think having good educational qualifications should be in deciding whether someone born, brought up and living outside Norway should be able to come and live here? |
| 557 | <a href="#">r7ocrecs ..</a> | How important is good education in deciding whether someone could come and live here?                                                          | discrete | numeric-12.0 | 4689  | 0       | How important do you think having good educational qualifications should be in deciding whether someone born, brought up and living outside Norway should be able to come and live here? |
| 558 | <a href="#">r7ocrecs ..</a> | How important is a Christian background in deciding whether someone could come and live here?                                                  | discrete | numeric-12.0 | 4689  | 0       | How important do you think coming from a Christian background should be in deciding whether someone should be able to come and live here?                                                |
| 559 | <a href="#">r7ocrecs ..</a> | How important is a Christian background in deciding whether someone could come and live here?                                                  | discrete | numeric-12.0 | 4689  | 0       | How important do you think coming from a Christian background should be in deciding whether someone should be able to come and live here?                                                |
| 560 | <a href="#">r7ocrecs ..</a> | How important is having skills that Norway needs in deciding whether someone could come and live here?                                         | discrete | numeric-12.0 | 4689  | 0       | How important do you think having work skills that Norway needs should be in deciding whether someone should be able to come and live here?                                              |

**File Norsk medborgerpanel - runde 7**

| #   | Name                         | Label                                                                                                  | Type     | Format       | Valid | Invalid | Question                                                                                                                                                                                 |
|-----|------------------------------|--------------------------------------------------------------------------------------------------------|----------|--------------|-------|---------|------------------------------------------------------------------------------------------------------------------------------------------------------------------------------------------|
| 561 | <a href="#">r7ocreces ..</a> | How important is having skills that Norway needs in deciding whether someone could come and live here? | discrete | numeric-12.0 | 4689  | 0       | How important do you think having work skills that Norway needs should be in deciding whether someone should be able to come and live here?                                              |
| 562 | <a href="#">r7ocreces ..</a> | How important is good education in deciding whether someone could come and live here?                  | discrete | numeric-12.0 | 4689  | 0       | How important do you think having good educational qualifications should be in deciding whether someone born, brought up and living outside Norway should be able to come and live here? |
| 563 | <a href="#">r7ocreces ..</a> | How important is good education in deciding whether someone could come and live here?                  | discrete | numeric-12.0 | 4689  | 0       | How important do you think having good educational qualifications should be in deciding whether someone born, brought up and living outside Norway should be able to come and live here? |
| 564 | <a href="#">r7ocreces ..</a> | How important is a Christian backround in deciding whether someone could come and live here?           | discrete | numeric-12.0 | 4689  | 0       | How important do you think coming from a Christian background should be in deciding whether someone should be able to come and live here?                                                |
| 565 | <a href="#">r7ocreces ..</a> | How important is a Christian backround in deciding whether someone could come and live here?           | discrete | numeric-12.0 | 4689  | 0       | How important do you think coming from a Christian background should be in deciding whether someone should be able to come and live here?                                                |
| 566 | <a href="#">r7ocreces ..</a> | How important is having skills that Norway needs in deciding whether someone could come and live here? | discrete | numeric-12.0 | 4689  | 0       | How important do you think having work skills that Norway needs should be in deciding whether someone should be able to come and live here?                                              |
| 567 | <a href="#">r7ocreces ..</a> | How important is having skills that Norway needs in deciding whether someone could come and live here? | discrete | numeric-12.0 | 4689  | 0       | How important do you think having work skills that Norway needs should be in deciding whether someone should be able to come and live here?                                              |
| 568 | <a href="#">r7ocreces ..</a> | How important is good education in deciding whether someone could come and live here?                  | discrete | numeric-12.0 | 4689  | 0       | How important do you think having good educational qualifications should be in deciding whether someone born, brought up and living outside Norway should be able to come and live here? |
| 569 | <a href="#">r7ocreces ..</a> | How important is a Christian backround in deciding whether someone could come and live here?           | discrete | numeric-12.0 | 4689  | 0       | How important do you think coming from a Christian background should be in deciding whether someone should be able to come and live here?                                                |
| 570 | <a href="#">r7ocreces ..</a> | How important is having skills that Norway needs in deciding whether someone could come and live here? | discrete | numeric-12.0 | 4689  | 0       | How important do you think having work skills that Norway needs should be in deciding whether someone should be able to come and live here?                                              |
| 571 | <a href="#">r7ocreces ..</a> | To what extent should the Supreme Court's power in controversial issues be reduced?                    | discrete | numeric-12.0 | 4689  | 0       | In general, to what extent do you think the Norwegian Supreme Court's power to decide certain types of controversial issues should be reduced?                                           |
| 572 | <a href="#">r7ocreces ..</a> | To what extent should the Supreme Court's power in controversial issues be reduced?                    | discrete | numeric-12.0 | 4689  | 0       | In general, to what extent do you think the Norwegian Supreme Court's power to decide certain types of controversial issues should be reduced?                                           |
| 573 | <a href="#">r7ocreces ..</a> | To what extent does the Supreme Court favor certain groups?                                            | discrete | numeric-12.0 | 4689  | 0       | To what extent do you think the decisions of the Norwegian Supreme Court favor certain groups more than others?                                                                          |

**File Norsk medborgerpanel - runde 7**

| #   | Name                       | Label                                                                                                         | Type     | Format       | Valid | Invalid | Question                                                                                                                                                                              |
|-----|----------------------------|---------------------------------------------------------------------------------------------------------------|----------|--------------|-------|---------|---------------------------------------------------------------------------------------------------------------------------------------------------------------------------------------|
| 574 | <a href="#">r7ocreca..</a> | To what extent does the Supreme Court favor certain groups?                                                   | discrete | numeric-12.0 | 4689  | 0       | To what extent do you think the decisions of the Norwegian Supreme Court favor certain groups more than others?                                                                       |
| 575 | <a href="#">r7ocreca..</a> | To what extent could the Supreme Court be dissolved, if it makes several decisions most people disagree with? | discrete | numeric-12.0 | 4689  | 0       | And to what extent do you think that If the Norwegian Supreme Court starts to make several decisions that most people disagree with, the institution might just as well be dissolved? |
| 576 | <a href="#">r7ocreca..</a> | To what extent could the Supreme Court be dissolved, if it makes several decisions most people disagree with? | discrete | numeric-12.0 | 4689  | 0       | And to what extent do you think that If the Norwegian Supreme Court starts to make several decisions that most people disagree with, the institution might just as well be dissolved? |
| 577 | <a href="#">r7ocreca..</a> | To what extent should the Supreme Court's power in controversial issues be reduced?                           | discrete | numeric-12.0 | 4689  | 0       | In general, to what extent do you think the Norwegian Supreme Court's power to decide certain types of controversial issues should be reduced?                                        |
| 578 | <a href="#">r7ocreca..</a> | To what extent should the Supreme Court's power in controversial issues be reduced?                           | discrete | numeric-12.0 | 4689  | 0       | In general, to what extent do you think the Norwegian Supreme Court's power to decide certain types of controversial issues should be reduced?                                        |
| 579 | <a href="#">r7ocreca..</a> | To what extent does the Supreme Court favor certain groups?                                                   | discrete | numeric-12.0 | 4689  | 0       | To what extent do you think the decisions of the Norwegian Supreme Court favor certain groups more than others?                                                                       |
| 580 | <a href="#">r7ocreca..</a> | To what extent does the Supreme Court favor certain groups?                                                   | discrete | numeric-12.0 | 4689  | 0       | To what extent do you think the decisions of the Norwegian Supreme Court favor certain groups more than others?                                                                       |
| 581 | <a href="#">r7ocreca..</a> | To what extent could the Supreme Court be dissolved, if it makes several decisions most people disagree with? | discrete | numeric-12.0 | 4689  | 0       | And to what extent do you think that If the Norwegian Supreme Court starts to make several decisions that most people disagree with, the institution might just as well be dissolved? |
| 582 | <a href="#">r7ocreca..</a> | To what extent could the Supreme Court be dissolved, if it makes several decisions most people disagree with? | discrete | numeric-12.0 | 4689  | 0       | And to what extent do you think that If the Norwegian Supreme Court starts to make several decisions that most people disagree with, the institution might just as well be dissolved? |
| 583 | <a href="#">r7ocreca..</a> | To what extent should the Supreme Court's power in controversial issues be reduced?                           | discrete | numeric-12.0 | 4689  | 0       | In general, to what extent do you think the Norwegian Supreme Court's power to decide certain types of controversial issues should be reduced?                                        |
| 584 | <a href="#">r7ocreca..</a> | To what extent does the Supreme Court favor certain groups?                                                   | discrete | numeric-12.0 | 4689  | 0       | To what extent do you think the decisions of the Norwegian Supreme Court favor certain groups more than others?                                                                       |
| 585 | <a href="#">r7ocreca..</a> | To what extent could the Supreme Court be dissolved, if it makes several decisions most people disagree with? | discrete | numeric-12.0 | 4689  | 0       | And to what extent do you think that If the Norwegian Supreme Court starts to make several decisions that most people disagree with, the institution might just as well be dissolved? |
| 586 | <a href="#">r7ran37</a>    | [Randomizes if u=1 OR u=4. ]                                                                                  | discrete | numeric-12.0 | 2323  | 2366    | -                                                                                                                                                                                     |
| 587 | <a href="#">r7qrevie..</a> | Satisfied with: Questions in this survey                                                                      | discrete | numeric-12.0 | 4689  | 0       | The questions you have answered this far in this survey?                                                                                                                              |

**File Norsk medborgerpanel - runde 7**

| #   | Name                        | Label                                                                         | Type     | Format       | Valid | Invalid | Question                                                                                                            |
|-----|-----------------------------|-------------------------------------------------------------------------------|----------|--------------|-------|---------|---------------------------------------------------------------------------------------------------------------------|
| 588 | <a href="#">r7qrevie ..</a> | Satisfied with: Participant in the Norwegian Citizen Panel                    | discrete | numeric-12.0 | 4689  | 0       | Being a participant in the Norwegian Citizen Panel.                                                                 |
| 589 | <a href="#">r7ran18</a>     | [Randomizes if u=1. ]                                                         | discrete | numeric-12.0 | 1149  | 3540    | -                                                                                                                   |
| 590 | <a href="#">r7pad4a</a>     | Contribution to joint kitty: Random person excluded                           | discrete | numeric-12.0 | 4689  | 0       | If you are one of the participants drawn out to win 1,000 kroner, how much would you put into the joint kitty?      |
| 591 | <a href="#">r7pad4b</a>     | Contribution to joint kitty: Person who contributes the least excluded        | discrete | numeric-12.0 | 4689  | 0       | If you are one of the participants drawn out to win 1,000 kroner, how much would you put into the joint kitty?      |
| 592 | <a href="#">r7ran19</a>     | [Randomizes if u=4. ]                                                         | discrete | numeric-12.0 | 1173  | 3516    | -                                                                                                                   |
| 593 | <a href="#">r7pad5a1_1</a>  | Choice between yellow/blue box                                                | discrete | numeric-12.0 | 4689  | 0       | Please take a decision.                                                                                             |
| 594 | <a href="#">r7pad5b1</a>    | Justify choice of yellow/blue box [anonymized]                                | discrete | character-54 | 4689  | 0       | We would like you to justify your choice before you take your decision.                                             |
| 595 | <a href="#">r7pad5b2_1</a>  | Choice between yellow/blue box                                                | discrete | numeric-12.0 | 4689  | 0       | Please take a decision:                                                                                             |
| 596 | <a href="#">r7pad5c1_1</a>  | Choice between yellow/blue box: The other person chose yellow                 | discrete | numeric-12.0 | 4689  | 0       | The other person has chosen the yellow box. Please take a decision:                                                 |
| 597 | <a href="#">r7pad5d1</a>    | Justify choice of yellow/blue box: The other person chose yellow [anonymized] | discrete | character-53 | 4689  | 0       | The other person has chosen the yellow box. We would like you to justify your choice before you take your decision. |
| 598 | <a href="#">r7pad5d2_1</a>  | Choice between yellow/blue box: The other person chose yellow                 | discrete | numeric-12.0 | 4689  | 0       | Please take a decision:                                                                                             |
| 599 | <a href="#">r7pad5e1_1</a>  | Choice between yellow/blue box: The other person chose blue                   | discrete | numeric-12.0 | 4689  | 0       | The other person has chosen the blue box. Please take a decision:                                                   |
| 600 | <a href="#">r7pad5f1</a>    | Justify choice of yellow/blue box: The other person chose blue [anonymized]   | discrete | character-54 | 4689  | 0       | The other person has chosen the blue box. We would like you to justify your choice before you take your decision.   |
| 601 | <a href="#">r7pad5f2_1</a>  | Choice between yellow/blue box: The other person chose blue                   | discrete | numeric-12.0 | 4689  | 0       | Please take a decision:                                                                                             |
| 602 | <a href="#">r7qrevie ..</a> | Satisfied with: Questions in this survey                                      | discrete | numeric-12.0 | 4689  | 0       | The questions you have answered this far in this survey?                                                            |
| 603 | <a href="#">r7qrevie ..</a> | Satisfied with: Participant in the Norwegian Citizen Panel                    | discrete | numeric-12.0 | 4689  | 0       | Being a participant in the Norwegian Citizen Panel.                                                                 |
| 604 | <a href="#">r7munici ..</a> | Size of municipality                                                          | discrete | numeric-55.0 | 4689  | 0       | -                                                                                                                   |
| 605 | <a href="#">r7P1</a>        | Gender                                                                        | discrete | numeric-55.0 | 4689  | 0       | -                                                                                                                   |
| 606 | <a href="#">r7P2</a>        | Region                                                                        | discrete | numeric-55.0 | 4689  | 0       | -                                                                                                                   |
| 607 | <a href="#">r7P3</a>        | County                                                                        | discrete | numeric-55.0 | 4689  | 0       | -                                                                                                                   |
| 608 | <a href="#">r7P4_1</a>      | Highest level of completed education                                          | discrete | numeric-55.0 | 4689  | 0       | -                                                                                                                   |
| 609 | <a href="#">r7P4_2</a>      | Highest level of completed education                                          | discrete | numeric-55.0 | 4689  | 0       | -                                                                                                                   |
| 610 | <a href="#">r7P5_1</a>      | Age                                                                           | discrete | numeric-55.0 | 4689  | 0       | -                                                                                                                   |
| 611 | <a href="#">r7P5_2</a>      | Age                                                                           | discrete | numeric-55.0 | 4689  | 0       | -                                                                                                                   |

**File Norsk medborgerpanel - runde 7**

| #   | Name                      | Label                                                                     | Type       | Format       | Valid | Invalid | Question |
|-----|---------------------------|---------------------------------------------------------------------------|------------|--------------|-------|---------|----------|
| 612 | <a href="#">r7Weight1</a> | Weight based on variables P3, P5_2 and P1. See documentation report       | continuous | numeric-55.4 | 4689  | 0       | -        |
| 613 | <a href="#">r7Weight2</a> | Weight based on variables P3, P5_2, P4_1 and P1. See documentation report | continuous | numeric-55.4 | 4689  | 0       | -        |

# Variables Description

Dataset contains 613 variable(s)

## File : Norsk medborgerpanel - runde 7

### # responseid: responseid

**Information** [Type= discrete] [Format=numeric] [Range= 1-1] [Missing=\*]

### # r7u: Respondent sub-group

**Information** [Type= discrete] [Format=numeric] [Range= 1-4] [Missing=\*]

**Statistics [NW/ W]** [Valid=4689 /-] [Invalid=0 /-]

| Value | Label | Cases | Percentage |
|-------|-------|-------|------------|
| 1     | U1    | 1184  | 25.3%      |
| 2     | U2    | 1199  | 25.6%      |
| 3     | U3    | 1103  | 23.5%      |
| 4     | U4    | 1203  | 25.7%      |

*Warning: these figures indicate the number of cases found in the data file. They cannot be interpreted as summary statistics of the population of interest.*

### # r7recruited: Recruitment wave

**Information** [Type= discrete] [Format=numeric] [Range= 1-3] [Missing=\*]

**Statistics [NW/ W]** [Valid=4689 /-] [Invalid=0 /-]

| Value | Label  | Cases | Percentage |
|-------|--------|-------|------------|
| 1     | Wave 1 | 2190  | 46.7%      |
| 3     | Wave 3 | 2499  | 53.3%      |

*Warning: these figures indicate the number of cases found in the data file. They cannot be interpreted as summary statistics of the population of interest.*

### # r7browsertype: Browertype used by respondent

**Information** [Type= discrete] [Format=character] [Missing=\*]

**Statistics [NW/ W]** [Valid=4689 /-] [Invalid=0 /-]

| Value            | Label | Cases | Percentage |
|------------------|-------|-------|------------|
| Chrome           |       | 1957  | 41.7%      |
| Firefox          |       | 373   | 8.0%       |
| IE               |       | 31    | 0.7%       |
| InternetExplorer |       | 741   | 15.8%      |
| Mozilla          |       | 115   | 2.5%       |
| Opera            |       | 4     | 0.1%       |
| Safari           |       | 1467  | 31.3%      |
| Unknown          |       | 1     | 0.0%       |

*Warning: these figures indicate the number of cases found in the data file. They cannot be interpreted as summary statistics of the population of interest.*

### # r7browserversion: Browser version used by respondent

**Information** [Type= discrete] [Format=character] [Missing=\*]

**Statistics [NW/ W]** [Valid=4689 /-] [Invalid=0 /-]

| Value | Label | Cases | Percentage |
|-------|-------|-------|------------|
| 0     |       | 155   | 3.3%       |
| 10    |       | 945   | 20.2%      |
| 10,3  |       | 1     | 0.0%       |
| 11    |       | 741   | 15.8%      |
| 27    |       | 1     | 0.0%       |
| 28    |       | 5     | 0.1%       |
| 30    |       | 3     | 0.1%       |



## File : Norsk medborgerpanel - runde 7

### # r7browserversion: Browser version used by respondent

| Value | Label | Cases | Percentage |
|-------|-------|-------|------------|
| 31    |       | 2     | 0.0%       |
| 33    |       | 3     | 0.1%       |
| 34    |       | 9     | 0.2%       |
| 36    |       | 1     | 0.0%       |
| 38    |       | 35    | 0.7%       |
| 39    |       | 2     | 0.0%       |
| 40    |       | 1     | 0.0%       |
| 41    |       | 3     | 0.1%       |
| 42    |       | 7     | 0.1%       |
| 43    |       | 4     | 0.1%       |
| 44    |       | 132   | 2.8%       |
| 45    |       | 11    | 0.2%       |
| 46    |       | 71    | 1.5%       |
| 47    |       | 11    | 0.2%       |
| 48    |       | 21    | 0.4%       |
| 49    |       | 366   | 7.8%       |
| 5     |       | 4     | 0.1%       |
| 5,1   |       | 6     | 0.1%       |
| 50    |       | 20    | 0.4%       |
| 51    |       | 408   | 8.7%       |
| 52    |       | 11    | 0.2%       |
| 53    |       | 99    | 2.1%       |
| 54    |       | 1096  | 23.4%      |
| 54,2  |       | 1     | 0.0%       |
| 56    |       | 7     | 0.1%       |
| 6     |       | 4     | 0.1%       |
| 6,1   |       | 5     | 0.1%       |
| 6,2   |       | 7     | 0.1%       |
| 7     |       | 33    | 0.7%       |
| 8     |       | 68    | 1.5%       |
| 9     |       | 316   | 6.7%       |
| 9,1   |       | 70    | 1.5%       |
| 9,8   |       | 4     | 0.1%       |

Warning: these figures indicate the number of cases found in the data file. They cannot be interpreted as summary statistics of the population of interest.

### # r7mobile: Determines if the respondents uses mobile

| Information        | [Type= discrete] [Format=numeric] [Range= 0-1] [Missing=*] |       |            |
|--------------------|------------------------------------------------------------|-------|------------|
| Statistics [NW/ W] | [Valid=4689 /-] [Invalid=0 /-]                             |       |            |
| Value              | Label                                                      | Cases | Percentage |
| 0                  | Other                                                      | 3396  | 72.4%      |
| 1                  | Mobile                                                     | 1293  | 27.6%      |

Warning: these figures indicate the number of cases found in the data file. They cannot be interpreted as summary statistics of the population of interest.

## File : Norsk medborgerpanel - runde 7

# r7deviceResolution: Screen resolution of the applied device

**Information** [Type= discrete] [Format=character] [Missing=\*]

**Statistics [NW/ W]** [Valid=4689 /-] [Invalid=0 /-]

| Value    | Label | Cases | Percentage |
|----------|-------|-------|------------|
| 0 0      |       | 3405  | 72.6%      |
| 106 284  |       | 1     | 0.0%       |
| 1098 800 |       | 1     | 0.0%       |
| 1112 800 |       | 2     | 0.0%       |
| 112 199  |       | 1     | 0.0%       |
| 1143 800 |       | 1     | 0.0%       |
| 115 320  |       | 1     | 0.0%       |
| 125 90   |       | 3     | 0.1%       |
| 128 90   |       | 52    | 1.1%       |
| 129 90   |       | 2     | 0.0%       |
| 131 180  |       | 1     | 0.0%       |
| 131 90   |       | 2     | 0.0%       |
| 132 90   |       | 1     | 0.0%       |
| 136 90   |       | 2     | 0.0%       |
| 139 90   |       | 1     | 0.0%       |
| 140 90   |       | 59    | 1.3%       |
| 141 90   |       | 1     | 0.0%       |
| 142 90   |       | 18    | 0.4%       |
| 143 90   |       | 2     | 0.0%       |
| 154 90   |       | 1     | 0.0%       |
| 160 284  |       | 7     | 0.1%       |
| 163 120  |       | 1     | 0.0%       |
| 166 120  |       | 7     | 0.1%       |
| 170 120  |       | 81    | 1.7%       |
| 171 115  |       | 1     | 0.0%       |
| 172 117  |       | 7     | 0.1%       |
| 173 120  |       | 1     | 0.0%       |
| 174 120  |       | 23    | 0.5%       |
| 178 120  |       | 1     | 0.0%       |
| 178 160  |       | 4     | 0.1%       |
| 186 117  |       | 6     | 0.1%       |
| 186 120  |       | 65    | 1.4%       |
| 186 125  |       | 21    | 0.4%       |
| 186 160  |       | 35    | 0.7%       |
| 187 120  |       | 2     | 0.0%       |
| 187 333  |       | 3     | 0.1%       |
| 188 117  |       | 1     | 0.0%       |
| 189 120  |       | 5     | 0.1%       |
| 193 120  |       | 3     | 0.1%       |
| 202 160  |       | 1     | 0.0%       |
| 205 120  |       | 4     | 0.1%       |

## File : Norsk medborgerpanel - runde 7

# r7deviceResolution: Screen resolution of the applied device

| Value     | Label | Cases | Percentage |
|-----------|-------|-------|------------|
| 207 160   |       | 1     | 0.0%       |
| 209 138   |       | 40    | 0.9%       |
| 213 120   |       | 1     | 0.0%       |
| 2176 1440 |       | 1     | 0.0%       |
| 220 138   |       | 1     | 0.0%       |
| 220 160   |       | 1     | 0.0%       |
| 230 156   |       | 1     | 0.0%       |
| 230 160   |       | 264   | 5.6%       |
| 246 160   |       | 4     | 0.1%       |
| 249 160   |       | 1     | 0.0%       |
| 252 160   |       | 1     | 0.0%       |
| 255 180   |       | 19    | 0.4%       |
| 256 180   |       | 36    | 0.8%       |
| 260 172   |       | 1     | 0.0%       |
| 262 180   |       | 5     | 0.1%       |
| 266 180   |       | 1     | 0.0%       |
| 268 180   |       | 1     | 0.0%       |
| 270 213   |       | 4     | 0.1%       |
| 272 180   |       | 1     | 0.0%       |
| 273 187   |       | 2     | 0.0%       |
| 279 180   |       | 10    | 0.2%       |
| 279 187   |       | 311   | 6.6%       |
| 280 180   |       | 3     | 0.1%       |
| 283 180   |       | 8     | 0.2%       |
| 284 180   |       | 3     | 0.1%       |
| 292 213   |       | 1     | 0.0%       |
| 295 187   |       | 7     | 0.1%       |
| 301 213   |       | 1     | 0.0%       |
| 302 213   |       | 4     | 0.1%       |
| 306 213   |       | 1     | 0.0%       |
| 307 180   |       | 1     | 0.0%       |
| 316 640   |       | 1     | 0.0%       |
| 324 512   |       | 1     | 0.0%       |
| 325 213   |       | 1     | 0.0%       |
| 325 722   |       | 1     | 0.0%       |
| 328 213   |       | 1     | 0.0%       |
| 331 722   |       | 1     | 0.0%       |
| 332 640   |       | 1     | 0.0%       |
| 333 213   |       | 1     | 0.0%       |
| 334 640   |       | 4     | 0.1%       |
| 335 640   |       | 2     | 0.0%       |
| 340 640   |       | 3     | 0.1%       |
| 341 240   |       | 2     | 0.0%       |

## File : Norsk medborgerpanel - runde 7

# r7deviceResolution: Screen resolution of the applied device

| Value    | Label | Cases | Percentage |
|----------|-------|-------|------------|
| 347 205  |       | 1     | 0.0%       |
| 350 240  |       | 1     | 0.0%       |
| 350 640  |       | 1     | 0.0%       |
| 361 722  |       | 1     | 0.0%       |
| 363 640  |       | 1     | 0.0%       |
| 372 240  |       | 5     | 0.1%       |
| 373 240  |       | 3     | 0.1%       |
| 375 240  |       | 1     | 0.0%       |
| 378 240  |       | 1     | 0.0%       |
| 388 640  |       | 1     | 0.0%       |
| 394 240  |       | 3     | 0.1%       |
| 396 300  |       | 1     | 0.0%       |
| 398 300  |       | 1     | 0.0%       |
| 401 320  |       | 2     | 0.0%       |
| 410 240  |       | 1     | 0.0%       |
| 414 1024 |       | 1     | 0.0%       |
| 414 853  |       | 1     | 0.0%       |
| 416 853  |       | 1     | 0.0%       |
| 420 853  |       | 4     | 0.1%       |
| 421 853  |       | 1     | 0.0%       |
| 427 384  |       | 1     | 0.0%       |
| 452 384  |       | 3     | 0.1%       |
| 463 962  |       | 1     | 0.0%       |
| 492 324  |       | 1     | 0.0%       |
| 541 357  |       | 1     | 0.0%       |
| 579 400  |       | 1     | 0.0%       |
| 581 383  |       | 3     | 0.1%       |
| 596 451  |       | 1     | 0.0%       |
| 616 1280 |       | 1     | 0.0%       |
| 618 1280 |       | 3     | 0.1%       |
| 619 452  |       | 1     | 0.0%       |
| 623 1280 |       | 1     | 0.0%       |
| 625 381  |       | 1     | 0.0%       |
| 631 1280 |       | 4     | 0.1%       |
| 637 1024 |       | 1     | 0.0%       |
| 638 1024 |       | 1     | 0.0%       |
| 638 1280 |       | 2     | 0.0%       |
| 642 1280 |       | 1     | 0.0%       |
| 648 1024 |       | 2     | 0.0%       |
| 661 1280 |       | 6     | 0.1%       |
| 665 1280 |       | 1     | 0.0%       |
| 666 1280 |       | 7     | 0.1%       |
| 666 1281 |       | 1     | 0.0%       |

## File : Norsk medborgerpanel - runde 7

### # r7deviceResolution: Screen resolution of the applied device

| Value    | Label | Cases | Percentage |
|----------|-------|-------|------------|
| 679 1280 |       | 8     | 0.2%       |
| 696 1280 |       | 1     | 0.0%       |
| 70 160   |       | 1     | 0.0%       |
| 740 533  |       | 1     | 0.0%       |
| 741 533  |       | 1     | 0.0%       |
| 74 0     |       | 1     | 0.0%       |
| 773 533  |       | 1     | 0.0%       |
| 894 768  |       | 2     | 0.0%       |
| 896 768  |       | 1     | 0.0%       |
| 903 600  |       | 1     | 0.0%       |
| 903 768  |       | 1     | 0.0%       |
| 904 768  |       | 1     | 0.0%       |
| 910 600  |       | 1     | 0.0%       |

Warning: these figures indicate the number of cases found in the data file. They cannot be interpreted as summary statistics of the population of interest.

### # r7device: Determines respondents device type.

|                                   |                                                            |
|-----------------------------------|------------------------------------------------------------|
| <b>Information</b>                | [Type= discrete] [Format=numeric] [Range= 1-3] [Missing=*] |
| <b>Statistics [NW/ W]</b>         | [Valid=4689 /-] [Invalid=0 /-]                             |
| <b>Interviewer's instructions</b> | [Determines respondents device type.]                      |

| Value | Label   | Cases | Percentage |
|-------|---------|-------|------------|
| 1     | PC      | 3463  | 73.9%      |
| 2     | Touch   | 1217  | 26.0%      |
| 3     | Generic | 9     | 0.2%       |

Warning: these figures indicate the number of cases found in the data file. They cannot be interpreted as summary statistics of the population of interest.

### # r7advancedwifeaturesenabled: Determine whether the respondent's browser supports Advanced WI Features that require client side scripts, such as sliders, drag-n-drop ranking, images instead of radio-buttons/check-boxes etc.

|                                   |                                                                                                                                                                                                     |
|-----------------------------------|-----------------------------------------------------------------------------------------------------------------------------------------------------------------------------------------------------|
| <b>Information</b>                | [Type= discrete] [Format=character] [Missing=*]                                                                                                                                                     |
| <b>Statistics [NW/ W]</b>         | [Valid=4689 /-] [Invalid=0 /-]                                                                                                                                                                      |
| <b>Interviewer's instructions</b> | [Determine whether the respondent's browser supports Advanced WI Features that require client side scripts, such as sliders, drag-n-drop ranking, images instead of radio-buttons/check-boxes etc.] |

| Value | Label | Cases | Percentage |
|-------|-------|-------|------------|
| FALSE |       | 17    | 0.4%       |
| TRUE  |       | 4672  | 99.6%      |

Warning: these figures indicate the number of cases found in the data file. They cannot be interpreted as summary statistics of the population of interest.

### # r7ktilfreds\_1: Satisfied with: Life at the moment

|                                   |                                                                                                                 |
|-----------------------------------|-----------------------------------------------------------------------------------------------------------------|
| <b>Information</b>                | [Type= discrete] [Format=numeric] [Range= 1-5] [Missing=*]                                                      |
| <b>Statistics [NW/ W]</b>         | [Valid=4689 /-] [Invalid=0 /-]                                                                                  |
| <b>Pre-question</b>               | We would like to ask some questions about satisfaction. How satisfied are you with:                             |
| <b>Literal question</b>           | Life at the moment?                                                                                             |
| <b>Interviewer's instructions</b> | [All respondents asked. ]                                                                                       |
| <b>Notes</b>                      | Livet nå om dagen? (Vi ønsker å starte med å stille deg noen spørsmål om tilfredshet. Hvor tilfreds er du med:) |

## File : Norsk medborgerpanel - runde 7

### # r7ktilfreds\_1: Satisfied with: Life at the moment

| Value | Label                | Cases | Percentage                                                                                |
|-------|----------------------|-------|-------------------------------------------------------------------------------------------|
| 1     | Very satisfied       | 1121  | 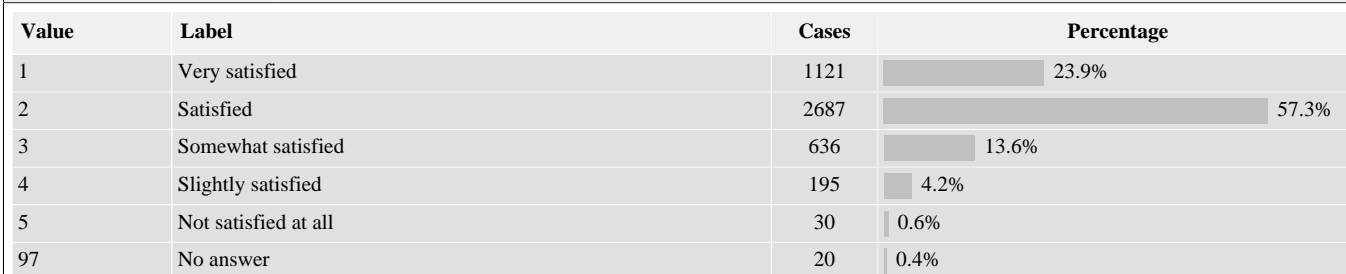 23.9% |
| 2     | Satisfied            | 2687  |  57.3% |
| 3     | Somewhat satisfied   | 636   |  13.6% |
| 4     | Slightly satisfied   | 195   |  4.2%  |
| 5     | Not satisfied at all | 30    |  0.6%  |
| 97    | No answer            | 20    |  0.4%  |

Warning: these figures indicate the number of cases found in the data file. They cannot be interpreted as summary statistics of the population of interest.

### # r7ktilfreds\_2: Satisfied with: Your personal economy

|                                   |                                                                                                                    |
|-----------------------------------|--------------------------------------------------------------------------------------------------------------------|
| <b>Information</b>                | [Type= discrete] [Format=numeric] [Range= 1-5] [Missing=*]                                                         |
| <b>Statistics [NW/ W]</b>         | [Valid=4689 /-] [Invalid=0 /-]                                                                                     |
| <b>Pre-question</b>               | We would like to ask some questions about satisfaction. How satisfied are you with:                                |
| <b>Literal question</b>           | Your personal economy?                                                                                             |
| <b>Interviewer's instructions</b> | [All respondents asked. ]                                                                                          |
| <b>Notes</b>                      | Din personlige økonomi? (Vi ønsker å starte med å stille deg noen spørsmål om tilfredshet. Hvor tilfreds er du med |

| Value | Label                | Cases | Percentage                                                                                  |
|-------|----------------------|-------|---------------------------------------------------------------------------------------------|
| 1     | Very satisfied       | 820   | 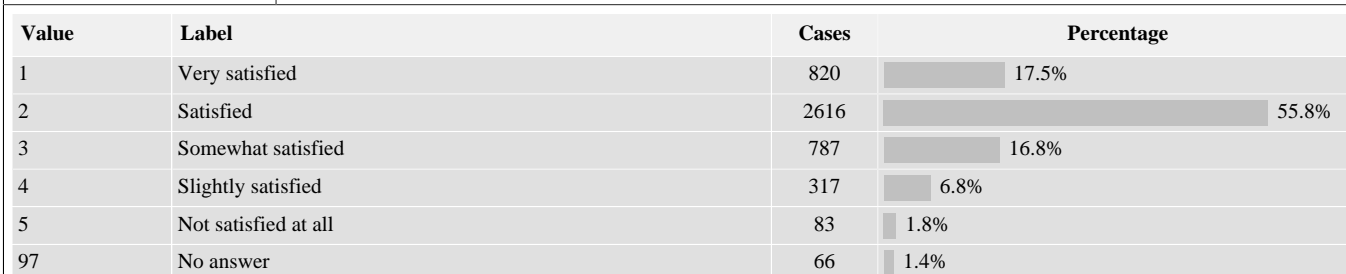 17.5%   |
| 2     | Satisfied            | 2616  |  55.8%   |
| 3     | Somewhat satisfied   | 787   |  16.8% |
| 4     | Slightly satisfied   | 317   |  6.8%  |
| 5     | Not satisfied at all | 83    |  1.8%  |
| 97    | No answer            | 66    |  1.4%  |

Warning: these figures indicate the number of cases found in the data file. They cannot be interpreted as summary statistics of the population of interest.

### # r7ktilfreds\_3: Satisfied with: The government in Norway

|                                   |                                                                                                                     |
|-----------------------------------|---------------------------------------------------------------------------------------------------------------------|
| <b>Information</b>                | [Type= discrete] [Format=numeric] [Range= 1-5] [Missing=*]                                                          |
| <b>Statistics [NW/ W]</b>         | [Valid=4689 /-] [Invalid=0 /-]                                                                                      |
| <b>Pre-question</b>               | We would like to ask some questions about satisfaction. How satisfied are you with:                                 |
| <b>Literal question</b>           | The present government in Norway?                                                                                   |
| <b>Interviewer's instructions</b> | [All respondents asked. ]                                                                                           |
| <b>Notes</b>                      | Dagens regjering i Norge? (Vi ønsker å starte med å stille deg noen spørsmål om tilfredshet. Hvor tilfreds er du me |

| Value | Label                | Cases | Percentage                                                                                  |
|-------|----------------------|-------|---------------------------------------------------------------------------------------------|
| 1     | Very satisfied       | 183   | 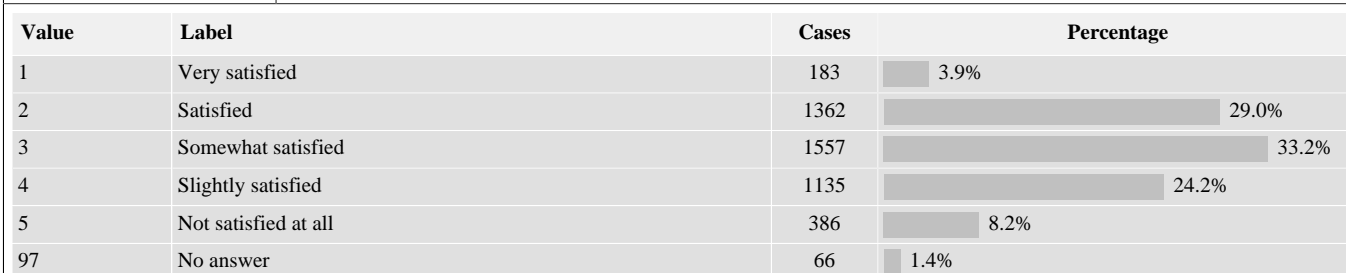 3.9%  |
| 2     | Satisfied            | 1362  |  29.0% |
| 3     | Somewhat satisfied   | 1557  |  33.2% |
| 4     | Slightly satisfied   | 1135  |  24.2% |
| 5     | Not satisfied at all | 386   |  8.2%  |
| 97    | No answer            | 66    |  1.4%  |

Warning: these figures indicate the number of cases found in the data file. They cannot be interpreted as summary statistics of the population of interest.

### # r7ktilfreds\_4: Satisfied with: How democracy works in Norway

|                           |                                                            |
|---------------------------|------------------------------------------------------------|
| <b>Information</b>        | [Type= discrete] [Format=numeric] [Range= 1-5] [Missing=*] |
| <b>Statistics [NW/ W]</b> | [Valid=4689 /-] [Invalid=0 /-]                             |

## File : Norsk medborgerpanel - runde 7

### # r7ktilfreds\_4: Satisfied with: How democracy works in Norway

|                                   |                                                                                                                   |
|-----------------------------------|-------------------------------------------------------------------------------------------------------------------|
| <b>Pre-question</b>               | We would like to ask some questions about satisfaction. How satisfied are you with:                               |
| <b>Literal question</b>           | The way in which democracy works in Norway?                                                                       |
| <b>Interviewer's instructions</b> | [All respondents asked. ]                                                                                         |
| <b>Notes</b>                      | Måten demokratiet fungerer på i Norge? (Vi ønsker å starte med å stille deg noen spørsmål om tilfredshet. Hvor ti |

| Value | Label                | Cases | Percentage                                                                                |
|-------|----------------------|-------|-------------------------------------------------------------------------------------------|
| 1     | Very satisfied       | 490   | 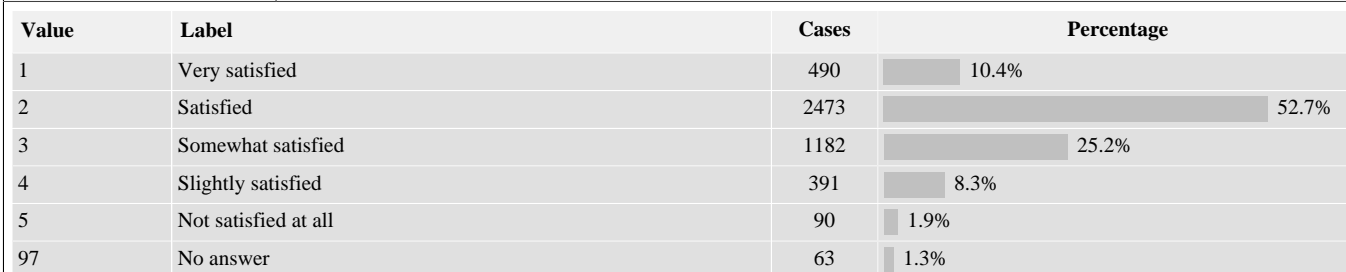 10.4% |
| 2     | Satisfied            | 2473  |  52.7% |
| 3     | Somewhat satisfied   | 1182  |  25.2% |
| 4     | Slightly satisfied   | 391   |  8.3%  |
| 5     | Not satisfied at all | 90    |  1.9%  |
| 97    | No answer            | 63    |  1.3%  |

*Warning: these figures indicate the number of cases found in the data file. They cannot be interpreted as summary statistics of the population of interest.*

### # r7k10: Perception of the economic situation in Norway

|                                   |                                                                     |
|-----------------------------------|---------------------------------------------------------------------|
| <b>Information</b>                | [Type= discrete] [Format=numeric] [Range= 1-7] [Missing=*]          |
| <b>Statistics [NW/ W]</b>         | [Valid=4689 /-] [Invalid=0 /-]                                      |
| <b>Literal question</b>           | How do you perceive the current economic situation to be in Norway? |
| <b>Post-question</b>              | Do you think it is:                                                 |
| <b>Interviewer's instructions</b> | [All respondents asked. ]                                           |

| Value | Label                | Cases | Percentage                                                                                  |
|-------|----------------------|-------|---------------------------------------------------------------------------------------------|
| 1     | Very good            | 569   | 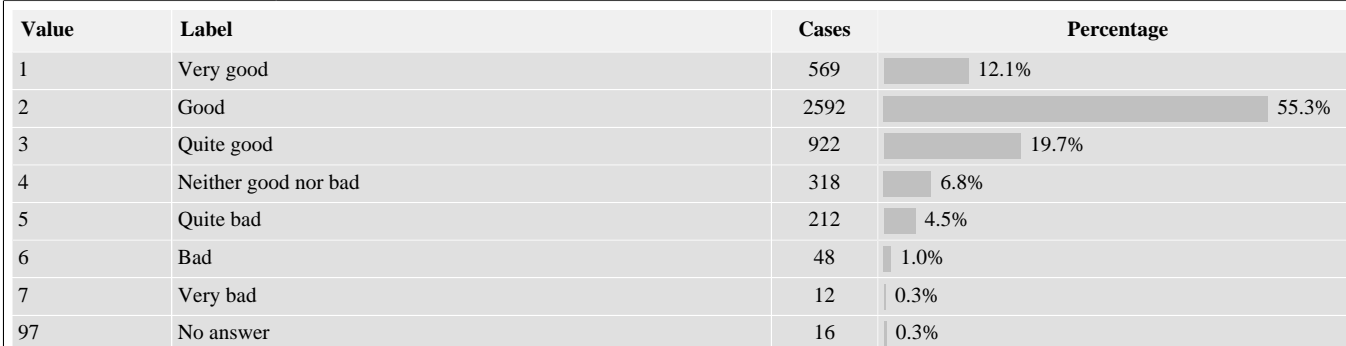 12.1% |
| 2     | Good                 | 2592  |  55.3% |
| 3     | Quite good           | 922   |  19.7% |
| 4     | Neither good nor bad | 318   |  6.8%  |
| 5     | Quite bad            | 212   |  4.5%  |
| 6     | Bad                  | 48    |  1.0%  |
| 7     | Very bad             | 12    |  0.3%  |
| 97    | No answer            | 16    |  0.3%  |

*Warning: these figures indicate the number of cases found in the data file. They cannot be interpreted as summary statistics of the population of interest.*

### # r7k204: Would vote for following party at parliamentary election tomorrow

|                                   |                                                                                 |
|-----------------------------------|---------------------------------------------------------------------------------|
| <b>Information</b>                | [Type= discrete] [Format=numeric] [Range= 1-12] [Missing=*]                     |
| <b>Statistics [NW/ W]</b>         | [Valid=4689 /-] [Invalid=0 /-]                                                  |
| <b>Literal question</b>           | Which party would you vote for if there were a parliamentary election tomorrow? |
| <b>Interviewer's instructions</b> | [All respondents asked. ]                                                       |

| Value | Label                            | Cases | Percentage                                                                                  |
|-------|----------------------------------|-------|---------------------------------------------------------------------------------------------|
| 1     | The Christian Democrats          | 201   | 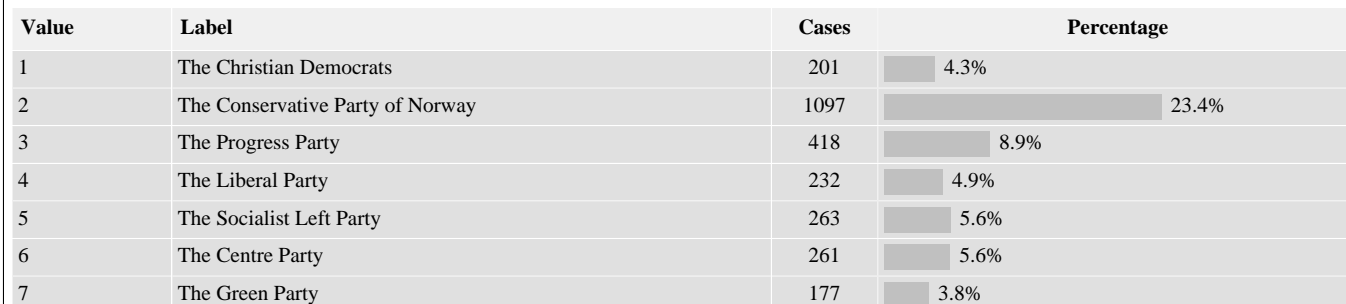 4.3%  |
| 2     | The Conservative Party of Norway | 1097  |  23.4% |
| 3     | The Progress Party               | 418   |  8.9%  |
| 4     | The Liberal Party                | 232   |  4.9%  |
| 5     | The Socialist Left Party         | 263   |  5.6%  |
| 6     | The Centre Party                 | 261   |  5.6%  |
| 7     | The Green Party                  | 177   |  3.8%  |

## File : Norsk medborgerpanel - runde 7

### # r7k204: Would vote for following party at parliamentary election tomorrow

| Value | Label                | Cases | Percentage |
|-------|----------------------|-------|------------|
| 8     | The Labour Party     | 1519  | 32.4%      |
| 9     | The Red Party        | 126   | 2.7%       |
| 10    | Would not vote       | 152   | 3.2%       |
| 11    | Not entitled to vote | 83    | 1.8%       |
| 12    | Other:               | 124   | 2.6%       |
| 97    | No answer            | 36    | 0.8%       |

Warning: these figures indicate the number of cases found in the data file. They cannot be interpreted as summary statistics of the population of interest.

### # r7k204\_12\_other: Would vote for following party at parliamentary election tomorrow, other [anonymized]

|                                   |                                                                                    |
|-----------------------------------|------------------------------------------------------------------------------------|
| <b>Information</b>                | [Type= discrete] [Format=character] [Missing=*]                                    |
| <b>Statistics [NW/ W]</b>         | [Valid=4689 /-] [Invalid=0 /-]                                                     |
| <b>Literal question</b>           | Which party would you vote for if there were a parliamentary election tomorrow?    |
| <b>Interviewer's instructions</b> | [All respondents asked. ]<br>[Data withheld for the sake of anonymity]             |
| <b>Notes</b>                      | Annet: (Hvilket parti ville du ha stemt på dersom det var stortingsvalg i morgen?) |

| Value | Label | Cases | Percentage |
|-------|-------|-------|------------|
|       |       | 4689  | 100.0%     |

Warning: these figures indicate the number of cases found in the data file. They cannot be interpreted as summary statistics of the population of interest.

### # r7k6\_1: Like/dislike: The Christian Democrats

|                                   |                                                                                                                           |
|-----------------------------------|---------------------------------------------------------------------------------------------------------------------------|
| <b>Information</b>                | [Type= discrete] [Format=numeric] [Range= 1-7] [Missing=*]                                                                |
| <b>Statistics [NW/ W]</b>         | [Valid=4689 /-] [Invalid=0 /-]                                                                                            |
| <b>Pre-question</b>               | We would like to ask you to consider how much you like or dislike the various political parties in Norway.                |
| <b>Literal question</b>           | The Christian Democrats                                                                                                   |
| <b>Interviewer's instructions</b> | [All respondents asked. ]                                                                                                 |
| <b>Notes</b>                      | Kristelig Folkeparti (Vi vil gjerne be deg vurdere hvor mye du liker eller misliker de ulike politiske partiene i Norge.) |

| Value | Label                    | Cases | Percentage |
|-------|--------------------------|-------|------------|
| 1     | Intensely dislike        | 492   | 10.5%      |
| 2     | Really dislike           | 769   | 16.4%      |
| 3     | Dislike somewhat         | 1156  | 24.7%      |
| 4     | Neither dislike nor like | 1059  | 22.6%      |
| 5     | Like somewhat            | 857   | 18.3%      |
| 6     | Really like              | 224   | 4.8%       |
| 7     | Intensely like           | 43    | 0.9%       |
| 97    | No answer                | 89    | 1.9%       |

Warning: these figures indicate the number of cases found in the data file. They cannot be interpreted as summary statistics of the population of interest.

### # r7k6\_2: Like/dislike: The Conservative Party

|                                   |                                                                                                            |
|-----------------------------------|------------------------------------------------------------------------------------------------------------|
| <b>Information</b>                | [Type= discrete] [Format=numeric] [Range= 1-7] [Missing=*]                                                 |
| <b>Statistics [NW/ W]</b>         | [Valid=4689 /-] [Invalid=0 /-]                                                                             |
| <b>Pre-question</b>               | We would like to ask you to consider how much you like or dislike the various political parties in Norway. |
| <b>Literal question</b>           | The Conservative Party                                                                                     |
| <b>Interviewer's instructions</b> | [All respondents asked. ]                                                                                  |



## File : Norsk medborgerpanel - runde 7

### # r7k6\_2: Like/dislike: The Conservative Party

**Notes** Høyre (Vi vil gjerne be deg vurdere hvor mye du liker eller misliker de ulike politiske partiene i Norge.)

| Value | Label                    | Cases | Percentage |
|-------|--------------------------|-------|------------|
| 1     | Intensely dislike        | 197   | 4.2%       |
| 2     | Really dislike           | 522   | 11.1%      |
| 3     | Dislike somewhat         | 972   | 20.7%      |
| 4     | Neither dislike nor like | 611   | 13.0%      |
| 5     | Like somewhat            | 1143  | 24.4%      |
| 6     | Really like              | 940   | 20.0%      |
| 7     | Intensely like           | 209   | 4.5%       |
| 97    | No answer                | 95    | 2.0%       |

*Warning: these figures indicate the number of cases found in the data file. They cannot be interpreted as summary statistics of the population of interest.*

### # r7k6\_3: Like/dislike: The Progress Party

**Information** [Type= discrete] [Format=numeric] [Range= 1-7] [Missing=\*]

**Statistics [NW/ W]** [Valid=4689 /-] [Invalid=0 /-]

**Pre-question** We would like to ask you to consider how much you like or dislike the various political parties in Norway.

**Literal question** The Progress Party

**Interviewer's instructions** [All respondents asked. ]

**Notes** Fremskrittspartiet (Vi vil gjerne be deg vurdere hvor mye du liker eller misliker de ulike politiske partiene i Norge.)

| Value | Label                    | Cases | Percentage |
|-------|--------------------------|-------|------------|
| 1     | Intensely dislike        | 1222  | 26.1%      |
| 2     | Really dislike           | 925   | 19.7%      |
| 3     | Dislike somewhat         | 721   | 15.4%      |
| 4     | Neither dislike nor like | 460   | 9.8%       |
| 5     | Like somewhat            | 712   | 15.2%      |
| 6     | Really like              | 422   | 9.0%       |
| 7     | Intensely like           | 135   | 2.9%       |
| 97    | No answer                | 92    | 2.0%       |

*Warning: these figures indicate the number of cases found in the data file. They cannot be interpreted as summary statistics of the population of interest.*

### # r7k6\_4: Like/dislike: The Liberal Party

**Information** [Type= discrete] [Format=numeric] [Range= 1-7] [Missing=\*]

**Statistics [NW/ W]** [Valid=4689 /-] [Invalid=0 /-]

**Pre-question** We would like to ask you to consider how much you like or dislike the various political parties in Norway.

**Literal question** The Liberal Party

**Interviewer's instructions** [All respondents asked. ]

**Notes** Venstre (Vi vil gjerne be deg vurdere hvor mye du liker eller misliker de ulike politiske partiene i Norge.)

| Value | Label                    | Cases | Percentage |
|-------|--------------------------|-------|------------|
| 1     | Intensely dislike        | 439   | 9.4%       |
| 2     | Really dislike           | 643   | 13.7%      |
| 3     | Dislike somewhat         | 1011  | 21.6%      |
| 4     | Neither dislike nor like | 1087  | 23.2%      |
| 5     | Like somewhat            | 1034  | 22.1%      |

## File : Norsk medborgerpanel - runde 7

### # r7k6\_4: Like/dislike: The Liberal Party

| Value | Label          | Cases | Percentage |
|-------|----------------|-------|------------|
| 6     | Really like    | 326   | 7.0%       |
| 7     | Intensely like | 53    | 1.1%       |
| 97    | No answer      | 96    | 2.0%       |

Warning: these figures indicate the number of cases found in the data file. They cannot be interpreted as summary statistics of the population of interest.

### # r7k6\_5: Like/dislike: The Socialist Left Party

|                                   |                                                                                                                           |
|-----------------------------------|---------------------------------------------------------------------------------------------------------------------------|
| <b>Information</b>                | [Type= discrete] [Format=numeric] [Range= 1-7] [Missing=*]                                                                |
| <b>Statistics [NW/ W]</b>         | [Valid=4689 /-] [Invalid=0 /-]                                                                                            |
| <b>Pre-question</b>               | We would like to ask you to consider how much you like or dislike the various political parties in Norway.                |
| <b>Literal question</b>           | The Socialist Left Party                                                                                                  |
| <b>Interviewer's instructions</b> | [All respondents asked. ]                                                                                                 |
| <b>Notes</b>                      | Sosialistisk Venstreparti (Vi vil gjerne be deg vurdere hvor mye du liker eller misliker de ulike politiske partiene i No |

| Value | Label                    | Cases | Percentage |
|-------|--------------------------|-------|------------|
| 1     | Intensely dislike        | 708   | 15.1%      |
| 2     | Really dislike           | 844   | 18.0%      |
| 3     | Dislike somewhat         | 814   | 17.4%      |
| 4     | Neither dislike nor like | 882   | 18.8%      |
| 5     | Like somewhat            | 850   | 18.1%      |
| 6     | Really like              | 408   | 8.7%       |
| 7     | Intensely like           | 87    | 1.9%       |
| 97    | No answer                | 96    | 2.0%       |

Warning: these figures indicate the number of cases found in the data file. They cannot be interpreted as summary statistics of the population of interest.

### # r7k6\_6: Like/dislike: The Centre Party

|                                   |                                                                                                                    |
|-----------------------------------|--------------------------------------------------------------------------------------------------------------------|
| <b>Information</b>                | [Type= discrete] [Format=numeric] [Range= 1-7] [Missing=*]                                                         |
| <b>Statistics [NW/ W]</b>         | [Valid=4689 /-] [Invalid=0 /-]                                                                                     |
| <b>Pre-question</b>               | We would like to ask you to consider how much you like or dislike the various political parties in Norway.         |
| <b>Literal question</b>           | The Centre Party                                                                                                   |
| <b>Interviewer's instructions</b> | [All respondents asked. ]                                                                                          |
| <b>Notes</b>                      | Senterpartiet (Vi vil gjerne be deg vurdere hvor mye du liker eller misliker de ulike politiske partiene i Norge.) |

| Value | Label                    | Cases | Percentage |
|-------|--------------------------|-------|------------|
| 1     | Intensely dislike        | 264   | 5.6%       |
| 2     | Really dislike           | 559   | 11.9%      |
| 3     | Dislike somewhat         | 964   | 20.6%      |
| 4     | Neither dislike nor like | 1497  | 31.9%      |
| 5     | Like somewhat            | 959   | 20.5%      |
| 6     | Really like              | 299   | 6.4%       |
| 7     | Intensely like           | 53    | 1.1%       |
| 97    | No answer                | 94    | 2.0%       |

Warning: these figures indicate the number of cases found in the data file. They cannot be interpreted as summary statistics of the population of interest.

### # r7k6\_7: Like/dislike: The Green Party

|                    |                                                            |
|--------------------|------------------------------------------------------------|
| <b>Information</b> | [Type= discrete] [Format=numeric] [Range= 1-7] [Missing=*] |
|--------------------|------------------------------------------------------------|

## File : Norsk medborgerpanel - runde 7

### # r7k6\_7: Like/dislike: The Green Party

|                                   |                                                                                                                         |
|-----------------------------------|-------------------------------------------------------------------------------------------------------------------------|
| <b>Statistics [NW/ W]</b>         | [Valid=4689 /-] [Invalid=0 /-]                                                                                          |
| <b>Pre-question</b>               | We would like to ask you to consider how much you like or dislike the various political parties in Norway.              |
| <b>Literal question</b>           | The Green Party                                                                                                         |
| <b>Interviewer's instructions</b> | [All respondents asked. ]                                                                                               |
| <b>Notes</b>                      | Miljøpartiet De Grønne (Vi vil gjerne be deg vurdere hvor mye du liker eller misliker de ulike politiske partiene i Nor |

| Value | Label                    | Cases | Percentage |
|-------|--------------------------|-------|------------|
| 1     | Intensely dislike        | 995   | 21.2%      |
| 2     | Really dislike           | 729   | 15.5%      |
| 3     | Dislike somewhat         | 814   | 17.4%      |
| 4     | Neither dislike nor like | 805   | 17.2%      |
| 5     | Like somewhat            | 874   | 18.6%      |
| 6     | Really like              | 320   | 6.8%       |
| 7     | Intensely like           | 64    | 1.4%       |
| 97    | No answer                | 88    | 1.9%       |

Warning: these figures indicate the number of cases found in the data file. They cannot be interpreted as summary statistics of the population of interest.

### # r7k6\_8: Like/dislike: The Labour Party

|                                   |                                                                                                                      |
|-----------------------------------|----------------------------------------------------------------------------------------------------------------------|
| <b>Information</b>                | [Type= discrete] [Format=numeric] [Range= 1-7] [Missing=*]                                                           |
| <b>Statistics [NW/ W]</b>         | [Valid=4689 /-] [Invalid=0 /-]                                                                                       |
| <b>Pre-question</b>               | We would like to ask you to consider how much you like or dislike the various political parties in Norway.           |
| <b>Literal question</b>           | The Labour Party                                                                                                     |
| <b>Interviewer's instructions</b> | [All respondents asked. ]                                                                                            |
| <b>Notes</b>                      | Arbeiderpartiet (Vi vil gjerne be deg vurdere hvor mye du liker eller misliker de ulike politiske partiene i Norge.) |

| Value | Label                    | Cases | Percentage |
|-------|--------------------------|-------|------------|
| 1     | Intensely dislike        | 142   | 3.0%       |
| 2     | Really dislike           | 339   | 7.2%       |
| 3     | Dislike somewhat         | 716   | 15.3%      |
| 4     | Neither dislike nor like | 640   | 13.6%      |
| 5     | Like somewhat            | 1357  | 28.9%      |
| 6     | Really like              | 1167  | 24.9%      |
| 7     | Intensely like           | 247   | 5.3%       |
| 97    | No answer                | 81    | 1.7%       |

Warning: these figures indicate the number of cases found in the data file. They cannot be interpreted as summary statistics of the population of interest.

### # r7k6\_9: Like/dislike: The Red Party

|                                   |                                                                                                            |
|-----------------------------------|------------------------------------------------------------------------------------------------------------|
| <b>Information</b>                | [Type= discrete] [Format=numeric] [Range= 1-7] [Missing=*]                                                 |
| <b>Statistics [NW/ W]</b>         | [Valid=4689 /-] [Invalid=0 /-]                                                                             |
| <b>Pre-question</b>               | We would like to ask you to consider how much you like or dislike the various political parties in Norway. |
| <b>Literal question</b>           | The Red Party                                                                                              |
| <b>Interviewer's instructions</b> | [All respondents asked. ]                                                                                  |
| <b>Notes</b>                      | Rødt (Vi vil gjerne be deg vurdere hvor mye du liker eller misliker de ulike politiske partiene i Norge.)  |

| Value | Label             | Cases | Percentage |
|-------|-------------------|-------|------------|
| 1     | Intensely dislike | 1097  | 23.4%      |

## File : Norsk medborgerpanel - runde 7

### # r7k6\_9: Like/dislike: The Red Party

| Value | Label                    | Cases | Percentage |
|-------|--------------------------|-------|------------|
| 2     | Really dislike           | 839   | 17.9%      |
| 3     | Dislike somewhat         | 714   | 15.2%      |
| 4     | Neither dislike nor like | 1027  | 21.9%      |
| 5     | Like somewhat            | 617   | 13.2%      |
| 6     | Really like              | 233   | 5.0%       |
| 7     | Intensely like           | 57    | 1.2%       |
| 97    | No answer                | 105   | 2.2%       |

Warning: these figures indicate the number of cases found in the data file. They cannot be interpreted as summary statistics of the population of interest.

### # r7k9\_1: [1] Most important political issues [anonymized]

|                            |                                                                                                                                                  |
|----------------------------|--------------------------------------------------------------------------------------------------------------------------------------------------|
| Information                | [Type= discrete] [Format=character] [Missing=*]                                                                                                  |
| Statistics [NW/ W]         | [Valid=4689 /-] [Invalid=0 /-]                                                                                                                   |
| Literal question           | What are the most important political issues or topics for you personally?                                                                       |
| Post-question              | Please list the three most important issues where 1 is the most important, 2 is the next most important and 3 is the third most important issue. |
| Interviewer's instructions | [All respondents asked. ]<br>[Data withheld for the sake of anonymity]                                                                           |

| Value | Label | Cases | Percentage |
|-------|-------|-------|------------|
|       |       | 4689  | 100.0%     |

Warning: these figures indicate the number of cases found in the data file. They cannot be interpreted as summary statistics of the population of interest.

### # r7k9\_2: [2] Most important political issues [anonymized]

|                            |                                                                                                                                                  |
|----------------------------|--------------------------------------------------------------------------------------------------------------------------------------------------|
| Information                | [Type= discrete] [Format=character] [Missing=*]                                                                                                  |
| Statistics [NW/ W]         | [Valid=4689 /-] [Invalid=0 /-]                                                                                                                   |
| Literal question           | What are the most important political issues or topics for you personally?                                                                       |
| Post-question              | Please list the three most important issues where 1 is the most important, 2 is the next most important and 3 is the third most important issue. |
| Interviewer's instructions | [All respondents asked. ]<br>[Data withheld for the sake of anonymity]                                                                           |

| Value | Label | Cases | Percentage |
|-------|-------|-------|------------|
|       |       | 4689  | 100.0%     |

Warning: these figures indicate the number of cases found in the data file. They cannot be interpreted as summary statistics of the population of interest.

### # r7k9\_3: [3] Most important political issues [anonymized]

|                            |                                                                                                                                                  |
|----------------------------|--------------------------------------------------------------------------------------------------------------------------------------------------|
| Information                | [Type= discrete] [Format=character] [Missing=*]                                                                                                  |
| Statistics [NW/ W]         | [Valid=4689 /-] [Invalid=0 /-]                                                                                                                   |
| Literal question           | What are the most important political issues or topics for you personally?                                                                       |
| Post-question              | Please list the three most important issues where 1 is the most important, 2 is the next most important and 3 is the third most important issue. |
| Interviewer's instructions | [All respondents asked. ]<br>[Data withheld for the sake of anonymity]                                                                           |

| Value | Label | Cases | Percentage |
|-------|-------|-------|------------|
|       |       | 4689  | 100.0%     |

Warning: these figures indicate the number of cases found in the data file. They cannot be interpreted as summary statistics of the population of interest.

## File : Norsk medborgerpanel - runde 7

### # r7ocreasm\_mobil: R7OCRECSM\_mobil

|                                   |                                                            |
|-----------------------------------|------------------------------------------------------------|
| <b>Information</b>                | [Type= discrete] [Format=numeric] [Range= 0-1] [Missing=*] |
| <b>Statistics [NW/ W]</b>         | [Valid=1199 /-] [Invalid=3490 /-]                          |
| <b>Interviewer's instructions</b> | [Determines respondents device type.]                      |

| Value   | Label                   | Cases | Percentage                                                                                |
|---------|-------------------------|-------|-------------------------------------------------------------------------------------------|
| 0       | Does not use smartphone | 885   | 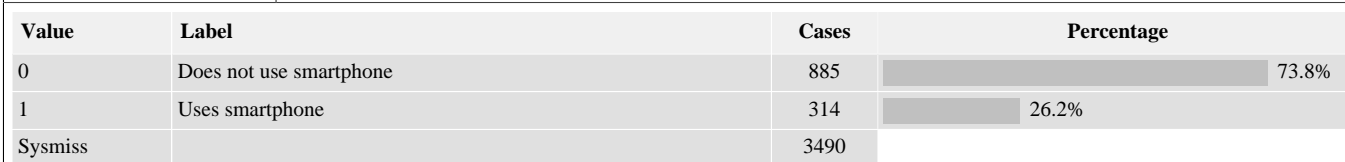 73.8% |
| 1       | Uses smartphone         | 314   |  26.2% |
| Sysmiss |                         | 3490  |                                                                                           |

Warning: these figures indicate the number of cases found in the data file. They cannot be interpreted as summary statistics of the population of interest.

### # r7ran20: [Randomizes if u=2. ]

|                                   |                                                            |
|-----------------------------------|------------------------------------------------------------|
| <b>Information</b>                | [Type= discrete] [Format=numeric] [Range= 1-3] [Missing=*] |
| <b>Statistics [NW/ W]</b>         | [Valid=1199 /-] [Invalid=3490 /-]                          |
| <b>Interviewer's instructions</b> | [Randomizes if u=2. ]                                      |

| Value   | Label | Cases | Percentage                                                                                |
|---------|-------|-------|-------------------------------------------------------------------------------------------|
| 1       | 1     | 372   | 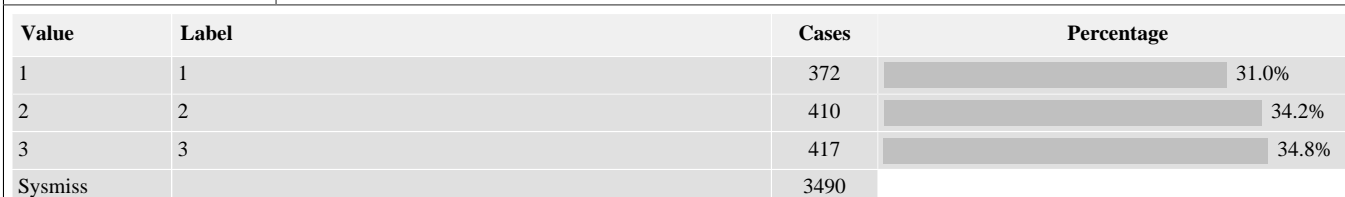 31.0% |
| 2       | 2     | 410   |  34.2% |
| 3       | 3     | 417   |  34.8% |
| Sysmiss |       | 3490  |                                                                                           |

Warning: these figures indicate the number of cases found in the data file. They cannot be interpreted as summary statistics of the population of interest.

### # r7ocreasm1a1\_1: How important is good education in deciding whether someone could come and live here?

|                                   |                                                                                                                                                                                          |
|-----------------------------------|------------------------------------------------------------------------------------------------------------------------------------------------------------------------------------------|
| <b>Information</b>                | [Type= discrete] [Format=numeric] [Range= 1-5] [Missing=*]                                                                                                                               |
| <b>Statistics [NW/ W]</b>         | [Valid=4689 /-] [Invalid=0 /-]                                                                                                                                                           |
| <b>Literal question</b>           | How important do you think having good educational qualifications should be in deciding whether someone born, brought up and living outside Norway should be able to come and live here? |
| <b>Interviewer's instructions</b> | [Asked if ran20=1 . ]                                                                                                                                                                    |
| <b>Notes</b>                      | R7OCRECSM1A1_1 (Hvor viktig synes du å ha en god utdanning bør være for å avgjøre om noen som er født, oppvokst og                                                                       |

| Value | Label      | Cases | Percentage                                                                                  |
|-------|------------|-------|---------------------------------------------------------------------------------------------|
| 1     | Not at all | 104   | 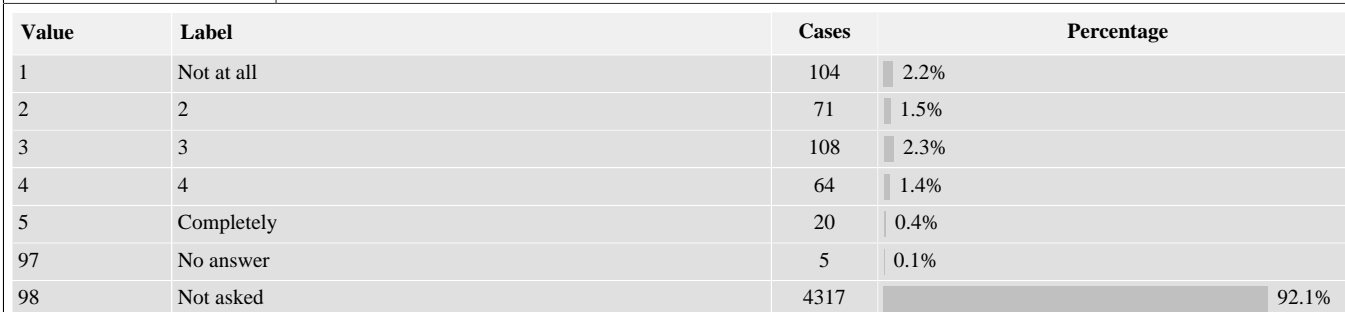 2.2%  |
| 2     | 2          | 71    |  1.5%  |
| 3     | 3          | 108   |  2.3%  |
| 4     | 4          | 64    |  1.4%  |
| 5     | Completely | 20    |  0.4%  |
| 97    | No answer  | 5     |  0.1%  |
| 98    | Not asked  | 4317  |  92.1% |

Warning: these figures indicate the number of cases found in the data file. They cannot be interpreted as summary statistics of the population of interest.

### # r7ocreasm1a2\_1: How important is a Christian background in deciding whether someone could come and live here?

|                                   |                                                                                                                                           |
|-----------------------------------|-------------------------------------------------------------------------------------------------------------------------------------------|
| <b>Information</b>                | [Type= discrete] [Format=numeric] [Range= 1-5] [Missing=*]                                                                                |
| <b>Statistics [NW/ W]</b>         | [Valid=4689 /-] [Invalid=0 /-]                                                                                                            |
| <b>Literal question</b>           | How important do you think coming from a Christian background should be in deciding whether someone should be able to come and live here? |
| <b>Interviewer's instructions</b> | [Asked if ran20=1 . ]                                                                                                                     |
| <b>Notes</b>                      | R7OCRECSM1A2_1 (Hvor viktig synes du en kristen bakgrunn bør være for å avgjøre om noen skal få bosette seg her? )                        |

## File : Norsk medborgerpanel - runde 7

### # r7ocreasm1a2\_1: How important is a Christian background in deciding whether someone could come and live here?

| Value | Label      | Cases | Percentage |
|-------|------------|-------|------------|
| 1     | Not at all | 225   | 4.8%       |
| 2     | 2          | 46    | 1.0%       |
| 3     | 3          | 58    | 1.2%       |
| 4     | 4          | 29    | 0.6%       |
| 5     | Completely | 10    | 0.2%       |
| 97    | No answer  | 4     | 0.1%       |
| 98    | Not asked  | 4317  | 92.1%      |

Warning: these figures indicate the number of cases found in the data file. They cannot be interpreted as summary statistics of the population of interest.

### # r7ocreasm1a3\_1: How important is having skills that Norway needs in deciding whether someone could come and live here?

|                                   |                                                                                                                                             |
|-----------------------------------|---------------------------------------------------------------------------------------------------------------------------------------------|
| <b>Information</b>                | [Type= discrete] [Format=numeric] [Range= 1-5] [Missing=*]                                                                                  |
| <b>Statistics [NW/ W]</b>         | [Valid=4689 /-] [Invalid=0 /-]                                                                                                              |
| <b>Literal question</b>           | How important do you think having work skills that Norway needs should be in deciding whether someone should be able to come and live here? |
| <b>Interviewer's instructions</b> | [Asked if ran20=1 . ]                                                                                                                       |
| <b>Notes</b>                      | R7OCRECSM1A3_1 (Hvor viktig synes du kunnskaper og ferdigheter som Norge trenger bør være for å avgjøre om noen skal                        |

| Value | Label      | Cases | Percentage |
|-------|------------|-------|------------|
| 1     | Not at all | 75    | 1.6%       |
| 2     | 2          | 77    | 1.6%       |
| 3     | 3          | 97    | 2.1%       |
| 4     | 4          | 96    | 2.0%       |
| 5     | Completely | 25    | 0.5%       |
| 97    | No answer  | 2     | 0.0%       |
| 98    | Not asked  | 4317  | 92.1%      |

Warning: these figures indicate the number of cases found in the data file. They cannot be interpreted as summary statistics of the population of interest.

### # r7ocreasm1b1: How important is good education in deciding whether someone could come and live here?

|                                   |                                                                                                                                                                                                                                 |
|-----------------------------------|---------------------------------------------------------------------------------------------------------------------------------------------------------------------------------------------------------------------------------|
| <b>Information</b>                | [Type= discrete] [Format=numeric] [Range= 0-50] [Missing=*]                                                                                                                                                                     |
| <b>Statistics [NW/ W]</b>         | [Valid=4689 /-] [Invalid=0 /-]                                                                                                                                                                                                  |
| <b>Literal question</b>           | How important do you think having good educational qualifications should be in deciding whether someone born, brought up and living outside Norway should be able to come and live here?                                        |
| <b>Interviewer's instructions</b> | [Asked if u=2, ran20=2 and R7OCRECSM_mobil=0. Version for desktop and tablet users. Mobile users are asked R7OCRECSM1B1_mobile. ]<br><br>[Slider is used to give answers. Departure position of the marker is set to value 25.] |
| <b>Notes</b>                      | Hvor viktig synes du å ha en god utdanning bør være for å avgjøre om noen som er født, oppvokst og bor utenfor Norg                                                                                                             |

| Value | Label      | Cases | Percentage |
|-------|------------|-------|------------|
| 0     | Not at all | 33    | 0.7%       |
| 1     | 1          | 6     | 0.1%       |
| 2     | 2          | 8     | 0.2%       |
| 3     | 3          | 3     | 0.1%       |
| 4     | 4          | 5     | 0.1%       |
| 5     | 5          | 1     | 0.0%       |

## File : Norsk medborgerpanel - runde 7

# r7ocrecsm1b1: How important is good education in deciding whether someone could come and live here?

| Value | Label | Cases | Percentage |
|-------|-------|-------|------------|
| 6     | 6     | 2     | 0.0%       |
| 7     | 7     | 8     | 0.2%       |
| 8     | 8     | 1     | 0.0%       |
| 9     | 9     | 4     | 0.1%       |
| 10    | 10    | 0     |            |
| 11    | 11    | 5     | 0.1%       |
| 12    | 12    | 4     | 0.1%       |
| 13    | 13    | 7     | 0.1%       |
| 14    | 14    | 9     | 0.2%       |
| 15    | 15    | 8     | 0.2%       |
| 16    | 16    | 3     | 0.1%       |
| 17    | 17    | 6     | 0.1%       |
| 18    | 18    | 2     | 0.0%       |
| 19    | 19    | 7     | 0.1%       |
| 20    | 20    | 5     | 0.1%       |
| 21    | 21    | 3     | 0.1%       |
| 22    | 22    | 3     | 0.1%       |
| 23    | 23    | 4     | 0.1%       |
| 24    | 24    | 6     | 0.1%       |
| 25    | 25    | 38    | 0.8%       |
| 26    | 26    | 3     | 0.1%       |
| 27    | 27    | 4     | 0.1%       |
| 28    | 28    | 10    | 0.2%       |
| 29    | 29    | 8     | 0.2%       |
| 30    | 30    | 7     | 0.1%       |
| 31    | 31    | 7     | 0.1%       |
| 32    | 32    | 5     | 0.1%       |
| 33    | 33    | 5     | 0.1%       |
| 34    | 34    | 4     | 0.1%       |
| 35    | 35    | 12    | 0.3%       |
| 36    | 36    | 9     | 0.2%       |
| 37    | 37    | 6     | 0.1%       |
| 38    | 38    | 5     | 0.1%       |
| 39    | 39    | 2     | 0.0%       |
| 40    | 40    | 4     | 0.1%       |
| 41    | 41    | 4     | 0.1%       |
| 42    | 42    | 3     | 0.1%       |
| 43    | 43    | 4     | 0.1%       |
| 44    | 44    | 3     | 0.1%       |
| 45    | 45    | 1     | 0.0%       |
| 46    | 46    | 2     | 0.0%       |
| 47    | 47    | 3     | 0.1%       |
| 48    | 48    | 0     |            |

## File : Norsk medborgerpanel - runde 7

### # r7ocreasm1b1: How important is good education in deciding whether someone could come and live here?

| Value | Label      | Cases | Percentage |
|-------|------------|-------|------------|
| 49    | 49         | 1     | 0.0%       |
| 50    | Completely | 7     | 0.1%       |
| 97    | No answer  | 0     |            |
| 98    | Not asked  | 4389  | 93.6%      |

*Warning: these figures indicate the number of cases found in the data file. They cannot be interpreted as summary statistics of the population of interest.*

### # r7ocreasm1b1\_mobile: How important is good education in deciding whether someone could come and live here?

|                                   |                                                                                                                                                                                                                                    |
|-----------------------------------|------------------------------------------------------------------------------------------------------------------------------------------------------------------------------------------------------------------------------------|
| <b>Information</b>                | [Type= discrete] [Format=numeric] [Range= 0-50] [Missing=*]                                                                                                                                                                        |
| <b>Statistics [NW/ W]</b>         | [Valid=4689 /-] [Invalid=0 /-]                                                                                                                                                                                                     |
| <b>Literal question</b>           | How important do you think having good educational qualifications should be in deciding whether someone born, brought up and living outside Norway should be able to come and live here?                                           |
| <b>Interviewer's instructions</b> | [Asked if u=2, ran20=2 and R7OCRECSM_mobil=1. Version for mobile users due to layout. Desktop/tablet users are asked R7OCRECSM1B1. ]<br><br>[Slider is used to give answers. Departure position of the marker is set to value 25.] |
| <b>Notes</b>                      | Hvor viktig synes du å ha en god utdanning bør være for å avgjøre om noen som er født, oppvokst og bor utenfor Norg                                                                                                                |

| Value | Label      | Cases | Percentage |
|-------|------------|-------|------------|
| 0     | Not at all | 13    | 0.3%       |
| 1     | 1          | 0     |            |
| 2     | 2          | 2     | 0.0%       |
| 3     | 3          | 0     |            |
| 4     | 4          | 3     | 0.1%       |
| 5     | 5          | 2     | 0.0%       |
| 6     | 6          | 5     | 0.1%       |
| 7     | 7          | 1     | 0.0%       |
| 8     | 8          | 2     | 0.0%       |
| 9     | 9          | 2     | 0.0%       |
| 10    | 10         | 3     | 0.1%       |
| 11    | 11         | 2     | 0.0%       |
| 12    | 12         | 1     | 0.0%       |
| 13    | 13         | 3     | 0.1%       |
| 14    | 14         | 2     | 0.0%       |
| 15    | 15         | 4     | 0.1%       |
| 16    | 16         | 1     | 0.0%       |
| 17    | 17         | 0     |            |
| 18    | 18         | 0     |            |
| 19    | 19         | 0     |            |
| 20    | 20         | 3     | 0.1%       |
| 21    | 21         | 4     | 0.1%       |
| 22    | 22         | 1     | 0.0%       |
| 23    | 23         | 0     |            |
| 24    | 24         | 0     |            |
| 25    | 25         | 15    | 0.3%       |
| 26    | 26         | 0     |            |
| 27    | 27         | 3     | 0.1%       |



## File : Norsk medborgerpanel - runde 7

### # r7ocreasm1b1\_mobile: How important is good education in deciding whether someone could come and live here?

| Value | Label      | Cases | Percentage |
|-------|------------|-------|------------|
| 28    | 28         | 1     | 0.0%       |
| 29    | 29         | 0     |            |
| 30    | 30         | 2     | 0.0%       |
| 31    | 31         | 1     | 0.0%       |
| 32    | 32         | 1     | 0.0%       |
| 33    | 33         | 0     |            |
| 34    | 34         | 2     | 0.0%       |
| 35    | 35         | 1     | 0.0%       |
| 36    | 36         | 3     | 0.1%       |
| 37    | 37         | 2     | 0.0%       |
| 38    | 38         | 3     | 0.1%       |
| 39    | 39         | 1     | 0.0%       |
| 40    | 40         | 2     | 0.0%       |
| 41    | 41         | 2     | 0.0%       |
| 42    | 42         | 3     | 0.1%       |
| 43    | 43         | 0     |            |
| 44    | 44         | 0     |            |
| 45    | 45         | 4     | 0.1%       |
| 46    | 46         | 1     | 0.0%       |
| 47    | 47         | 0     |            |
| 48    | 48         | 2     | 0.0%       |
| 49    | 49         | 1     | 0.0%       |
| 50    | Completely | 6     | 0.1%       |
| 97    | No answer  | 0     |            |
| 98    | Not asked  | 4579  | 97.7%      |

Warning: these figures indicate the number of cases found in the data file. They cannot be interpreted as summary statistics of the population of interest.

### # r7ocreasm1b2: How important is a Christian background in deciding whether someone could come and live here?

|                                   |                                                                                                                                                                                                                                 |
|-----------------------------------|---------------------------------------------------------------------------------------------------------------------------------------------------------------------------------------------------------------------------------|
| <b>Information</b>                | [Type= discrete] [Format=numeric] [Range= 0-50] [Missing=*]                                                                                                                                                                     |
| <b>Statistics [NW/ W]</b>         | [Valid=4689 /-] [Invalid=0 /-]                                                                                                                                                                                                  |
| <b>Literal question</b>           | How important do you think coming from a Christian background should be in deciding whether someone should be able to come and live here?                                                                                       |
| <b>Interviewer's instructions</b> | [Asked if u=2, ran20=2 and R7OCRECSM_mobil=0. Version for desktop and tablet users. Mobile users are asked R7OCRECSM1B2_mobile. ]<br><br>[Slider is used to give answers. Departure position of the marker is set to value 25.] |
| <b>Notes</b>                      | Hvor viktig synes du en kristen bakgrunn bør være for å avgjøre om noen skal få bosette seg her? ^f('R7OCRECSM_skal                                                                                                             |

| Value | Label      | Cases | Percentage |
|-------|------------|-------|------------|
| 0     | Not at all | 117   | 2.5%       |
| 1     | 1          | 6     | 0.1%       |
| 2     | 2          | 8     | 0.2%       |
| 3     | 3          | 6     | 0.1%       |
| 4     | 4          | 7     | 0.1%       |
| 5     | 5          | 5     | 0.1%       |
| 6     | 6          | 5     | 0.1%       |

## File : Norsk medborgerpanel - runde 7

# r7ocreasm1b2: How important is a Christian background in deciding whether someone could come and live here?

| Value | Label | Cases | Percentage |
|-------|-------|-------|------------|
| 7     | 7     | 6     | 0.1%       |
| 8     | 8     | 3     | 0.1%       |
| 9     | 9     | 12    | 0.3%       |
| 10    | 10    | 3     | 0.1%       |
| 11    | 11    | 6     | 0.1%       |
| 12    | 12    | 3     | 0.1%       |
| 13    | 13    | 8     | 0.2%       |
| 14    | 14    | 6     | 0.1%       |
| 15    | 15    | 4     | 0.1%       |
| 16    | 16    | 5     | 0.1%       |
| 17    | 17    | 2     | 0.0%       |
| 18    | 18    | 2     | 0.0%       |
| 19    | 19    | 3     | 0.1%       |
| 20    | 20    | 2     | 0.0%       |
| 21    | 21    | 4     | 0.1%       |
| 22    | 22    | 1     | 0.0%       |
| 23    | 23    | 4     | 0.1%       |
| 24    | 24    | 4     | 0.1%       |
| 25    | 25    | 32    | 0.7%       |
| 26    | 26    | 2     | 0.0%       |
| 27    | 27    | 1     | 0.0%       |
| 28    | 28    | 2     | 0.0%       |
| 29    | 29    | 1     | 0.0%       |
| 30    | 30    | 3     | 0.1%       |
| 31    | 31    | 2     | 0.0%       |
| 32    | 32    | 1     | 0.0%       |
| 33    | 33    | 2     | 0.0%       |
| 34    | 34    | 3     | 0.1%       |
| 35    | 35    | 2     | 0.0%       |
| 36    | 36    | 1     | 0.0%       |
| 37    | 37    | 3     | 0.1%       |
| 38    | 38    | 1     | 0.0%       |
| 39    | 39    | 1     | 0.0%       |
| 40    | 40    | 2     | 0.0%       |
| 41    | 41    | 0     |            |
| 42    | 42    | 2     | 0.0%       |
| 43    | 43    | 1     | 0.0%       |
| 44    | 44    | 0     |            |
| 45    | 45    | 0     |            |
| 46    | 46    | 0     |            |
| 47    | 47    | 0     |            |
| 48    | 48    | 0     |            |
| 49    | 49    | 1     | 0.0%       |

## File : Norsk medborgerpanel - runde 7

### # r7ocreasm1b2: How important is a Christian background in deciding whether someone could come and live here?

| Value | Label      | Cases | Percentage |
|-------|------------|-------|------------|
| 50    | Completely | 5     | 0.1%       |
| 97    | No answer  | 0     |            |
| 98    | Not asked  | 4389  | 93.6%      |

*Warning: these figures indicate the number of cases found in the data file. They cannot be interpreted as summary statistics of the population of interest.*

### # r7ocreasm1b2\_mobile: How important is a Christian background in deciding whether someone could come and live here?

|                                   |                                                                                                                                                                                                                                    |
|-----------------------------------|------------------------------------------------------------------------------------------------------------------------------------------------------------------------------------------------------------------------------------|
| <b>Information</b>                | [Type= discrete] [Format=numeric] [Range= 0-50] [Missing=*]                                                                                                                                                                        |
| <b>Statistics [NW/ W]</b>         | [Valid=4689 /-] [Invalid=0 /-]                                                                                                                                                                                                     |
| <b>Literal question</b>           | How important do you think coming from a Christian background should be in deciding whether someone should be able to come and live here?                                                                                          |
| <b>Interviewer's instructions</b> | [Asked if u=2, ran20=2 and R7OCRECSM_mobil=1. Version for mobile users due to layout. Desktop/tablet users are asked R7OCRECSM1B2. ]<br><br>[Slider is used to give answers. Departure position of the marker is set to value 25.] |
| <b>Notes</b>                      | Hvor viktig synes du en kristen bakgrunn bør være for å avgjøre om noen skal få bosette seg her?                                                                                                                                   |

| Value | Label      | Cases | Percentage |
|-------|------------|-------|------------|
| 0     | Not at all | 39    | 0.8%       |
| 1     | 1          | 5     | 0.1%       |
| 2     | 2          | 1     | 0.0%       |
| 3     | 3          | 2     | 0.0%       |
| 4     | 4          | 5     | 0.1%       |
| 5     | 5          | 1     | 0.0%       |
| 6     | 6          | 3     | 0.1%       |
| 7     | 7          | 0     |            |
| 8     | 8          | 1     | 0.0%       |
| 9     | 9          | 1     | 0.0%       |
| 10    | 10         | 3     | 0.1%       |
| 11    | 11         | 1     | 0.0%       |
| 12    | 12         | 3     | 0.1%       |
| 13    | 13         | 2     | 0.0%       |
| 14    | 14         | 2     | 0.0%       |
| 15    | 15         | 0     |            |
| 16    | 16         | 2     | 0.0%       |
| 17    | 17         | 1     | 0.0%       |
| 18    | 18         | 0     |            |
| 19    | 19         | 0     |            |
| 20    | 20         | 0     |            |
| 21    | 21         | 2     | 0.0%       |
| 22    | 22         | 0     |            |
| 23    | 23         | 0     |            |
| 24    | 24         | 0     |            |
| 25    | 25         | 20    | 0.4%       |
| 26    | 26         | 1     | 0.0%       |
| 27    | 27         | 0     |            |

## File : Norsk medborgerpanel - runde 7

# r7ocreasm1b2\_mobile: How important is a Christian background in deciding whether someone could come and live here?

| Value | Label      | Cases | Percentage |
|-------|------------|-------|------------|
| 28    | 28         | 1     | 0.0%       |
| 29    | 29         | 0     |            |
| 30    | 30         | 2     | 0.0%       |
| 31    | 31         | 1     | 0.0%       |
| 32    | 32         | 0     |            |
| 33    | 33         | 0     |            |
| 34    | 34         | 0     |            |
| 35    | 35         | 0     |            |
| 36    | 36         | 0     |            |
| 37    | 37         | 1     | 0.0%       |
| 38    | 38         | 2     | 0.0%       |
| 39    | 39         | 0     |            |
| 40    | 40         | 2     | 0.0%       |
| 41    | 41         | 1     | 0.0%       |
| 42    | 42         | 0     |            |
| 43    | 43         | 1     | 0.0%       |
| 44    | 44         | 2     | 0.0%       |
| 45    | 45         | 0     |            |
| 46    | 46         | 0     |            |
| 47    | 47         | 0     |            |
| 48    | 48         | 0     |            |
| 49    | 49         | 1     | 0.0%       |
| 50    | Completely | 1     | 0.0%       |
| 97    | No answer  | 0     |            |
| 98    | Not asked  | 4579  | 97.7%      |

Warning: these figures indicate the number of cases found in the data file. They cannot be interpreted as summary statistics of the population of interest.

# r7ocreasm1b3: How important is having skills that Norway needs in deciding whether someone could come and live here?

|                                   |                                                                                                                                                                                                                                 |
|-----------------------------------|---------------------------------------------------------------------------------------------------------------------------------------------------------------------------------------------------------------------------------|
| <b>Information</b>                | [Type= discrete] [Format=numeric] [Range= 0-50] [Missing=*]                                                                                                                                                                     |
| <b>Statistics [NW/ W]</b>         | [Valid=4689 /-] [Invalid=0 /-]                                                                                                                                                                                                  |
| <b>Literal question</b>           | How important do you think having work skills that Norway needs should be in deciding whether someone should be able to come and live here?                                                                                     |
| <b>Interviewer's instructions</b> | [Asked if u=2, ran20=2 and R7OCRECSM_mobil=0. Version for desktop and tablet users. Mobile users are asked R7OCRECSM1B3_mobile. ]<br><br>[Slider is used to give answers. Departure position of the marker is set to value 25.] |
| <b>Notes</b>                      | Hvor viktig synes du kunnskaper og ferdigheter som Norge trenger bør være for å avgjøre om noen skal få bosette seg                                                                                                             |

| Value | Label      | Cases | Percentage |
|-------|------------|-------|------------|
| 0     | Not at all | 22    | 0.5%       |
| 1     | 1          | 0     |            |
| 2     | 2          | 1     | 0.0%       |
| 3     | 3          | 4     | 0.1%       |
| 4     | 4          | 5     | 0.1%       |

## File : Norsk medborgerpanel - runde 7

# r7ocrecsm1b3: How important is having skills that Norway needs in deciding whether someone could come and live here?

| Value | Label | Cases | Percentage |
|-------|-------|-------|------------|
| 5     | 5     | 3     | 0.1%       |
| 6     | 6     | 3     | 0.1%       |
| 7     | 7     | 6     | 0.1%       |
| 8     | 8     | 4     | 0.1%       |
| 9     | 9     | 4     | 0.1%       |
| 10    | 10    | 2     | 0.0%       |
| 11    | 11    | 5     | 0.1%       |
| 12    | 12    | 7     | 0.1%       |
| 13    | 13    | 10    | 0.2%       |
| 14    | 14    | 0     |            |
| 15    | 15    | 5     | 0.1%       |
| 16    | 16    | 3     | 0.1%       |
| 17    | 17    | 8     | 0.2%       |
| 18    | 18    | 4     | 0.1%       |
| 19    | 19    | 2     | 0.0%       |
| 20    | 20    | 1     | 0.0%       |
| 21    | 21    | 1     | 0.0%       |
| 22    | 22    | 1     | 0.0%       |
| 23    | 23    | 2     | 0.0%       |
| 24    | 24    | 7     | 0.1%       |
| 25    | 25    | 45    | 1.0%       |
| 26    | 26    | 1     | 0.0%       |
| 27    | 27    | 5     | 0.1%       |
| 28    | 28    | 6     | 0.1%       |
| 29    | 29    | 6     | 0.1%       |
| 30    | 30    | 12    | 0.3%       |
| 31    | 31    | 7     | 0.1%       |
| 32    | 32    | 7     | 0.1%       |
| 33    | 33    | 5     | 0.1%       |
| 34    | 34    | 12    | 0.3%       |
| 35    | 35    | 10    | 0.2%       |
| 36    | 36    | 14    | 0.3%       |
| 37    | 37    | 7     | 0.1%       |
| 38    | 38    | 8     | 0.2%       |
| 39    | 39    | 7     | 0.1%       |
| 40    | 40    | 7     | 0.1%       |
| 41    | 41    | 3     | 0.1%       |
| 42    | 42    | 3     | 0.1%       |
| 43    | 43    | 2     | 0.0%       |
| 44    | 44    | 1     | 0.0%       |
| 45    | 45    | 4     | 0.1%       |
| 46    | 46    | 2     | 0.0%       |
| 47    | 47    | 3     | 0.1%       |

## File : Norsk medborgerpanel - runde 7

# r7ocreasm1b3: How important is having skills that Norway needs in deciding whether someone could come and live here?

| Value | Label      | Cases | Percentage |
|-------|------------|-------|------------|
| 48    | 48         | 1     | 0.0%       |
| 49    | 49         | 2     | 0.0%       |
| 50    | Completely | 10    | 0.2%       |
| 97    | No answer  | 0     |            |
| 98    | Not asked  | 4389  | 93.6%      |

Warning: these figures indicate the number of cases found in the data file. They cannot be interpreted as summary statistics of the population of interest.

# r7ocreasm1b3\_mobile: How important is having skills that Norway needs in deciding whether someone could come and live here?

|                            |                                                                                                                                                                                                                                    |
|----------------------------|------------------------------------------------------------------------------------------------------------------------------------------------------------------------------------------------------------------------------------|
| Information                | [Type= discrete] [Format=numeric] [Range= 0-50] [Missing=*]                                                                                                                                                                        |
| Statistics [NW/ W]         | [Valid=4689 /-] [Invalid=0 /-]                                                                                                                                                                                                     |
| Literal question           | How important do you think having work skills that Norway needs should be in deciding whether someone should be able to come and live here?                                                                                        |
| Interviewer's instructions | [Asked if u=2, ran20=2 and R7OCRECSM_mobil=1. Version for mobile users due to layout. Desktop/tablet users are asked R7OCRECSM1B3. ]<br><br>[Slider is used to give answers. Departure position of the marker is set to value 25.] |
| Notes                      | Hvor viktig synes du kunnskaper og ferdigheter som Norge trenger bør være for å avgjøre om noen skal få bosette seg                                                                                                                |

| Value | Label      | Cases | Percentage |
|-------|------------|-------|------------|
| 0     | Not at all | 7     | 0.1%       |
| 1     | 1          | 1     | 0.0%       |
| 2     | 2          | 0     |            |
| 3     | 3          | 0     |            |
| 4     | 4          | 2     | 0.0%       |
| 5     | 5          | 2     | 0.0%       |
| 6     | 6          | 2     | 0.0%       |
| 7     | 7          | 3     | 0.1%       |
| 8     | 8          | 3     | 0.1%       |
| 9     | 9          | 1     | 0.0%       |
| 10    | 10         | 2     | 0.0%       |
| 11    | 11         | 2     | 0.0%       |
| 12    | 12         | 1     | 0.0%       |
| 13    | 13         | 1     | 0.0%       |
| 14    | 14         | 1     | 0.0%       |
| 15    | 15         | 3     | 0.1%       |
| 16    | 16         | 1     | 0.0%       |
| 17    | 17         | 0     |            |
| 18    | 18         | 0     |            |
| 19    | 19         | 0     |            |
| 20    | 20         | 1     | 0.0%       |
| 21    | 21         | 2     | 0.0%       |
| 22    | 22         | 0     |            |
| 23    | 23         | 0     |            |
| 24    | 24         | 1     | 0.0%       |

## File : Norsk medborgerpanel - runde 7

# r7ocreasm1b3\_mobile: How important is having skills that Norway needs in deciding whether someone could come and live here?

| Value | Label      | Cases | Percentage |
|-------|------------|-------|------------|
| 25    | 25         | 21    | 0.4%       |
| 26    | 26         | 3     | 0.1%       |
| 27    | 27         | 0     |            |
| 28    | 28         | 3     | 0.1%       |
| 29    | 29         | 1     | 0.0%       |
| 30    | 30         | 2     | 0.0%       |
| 31    | 31         | 1     | 0.0%       |
| 32    | 32         | 0     |            |
| 33    | 33         | 0     |            |
| 34    | 34         | 2     | 0.0%       |
| 35    | 35         | 1     | 0.0%       |
| 36    | 36         | 2     | 0.0%       |
| 37    | 37         | 2     | 0.0%       |
| 38    | 38         | 4     | 0.1%       |
| 39    | 39         | 1     | 0.0%       |
| 40    | 40         | 2     | 0.0%       |
| 41    | 41         | 1     | 0.0%       |
| 42    | 42         | 1     | 0.0%       |
| 43    | 43         | 1     | 0.0%       |
| 44    | 44         | 3     | 0.1%       |
| 45    | 45         | 3     | 0.1%       |
| 46    | 46         | 2     | 0.0%       |
| 47    | 47         | 7     | 0.1%       |
| 48    | 48         | 1     | 0.0%       |
| 49    | 49         | 1     | 0.0%       |
| 50    | Completely | 9     | 0.2%       |
| 97    | No answer  | 0     |            |
| 98    | Not asked  | 4579  | 97.7%      |

Warning: these figures indicate the number of cases found in the data file. They cannot be interpreted as summary statistics of the population of interest.

# r7ocreasm1c1: How important is good education in deciding whether someone could come and live here?

|                                   |                                                                                                                                                                                                                                |
|-----------------------------------|--------------------------------------------------------------------------------------------------------------------------------------------------------------------------------------------------------------------------------|
| <b>Information</b>                | [Type= discrete] [Format=numeric] [Range= 0-50] [Missing=*]                                                                                                                                                                    |
| <b>Statistics [NW/ W]</b>         | [Valid=4689 /-] [Invalid=0 /-]                                                                                                                                                                                                 |
| <b>Literal question</b>           | How important do you think having good educational qualifications should be in deciding whether someone born, brought up and living outside Norway should be able to come and live here?                                       |
| <b>Interviewer's instructions</b> | [Asked if u=2, ran20=3 and R7OCRECSM_mobil=0. Version for desktop and tablet users. Mobile users are asked R7OCRECSM1C1_mobile. ]<br><br>[Slider is used to give answers. Departure position of the marker is set to value 1.] |
| <b>Notes</b>                      | Hvor viktig synes du å ha en god utdanning bør være for å avgjøre om noen som er født, oppvokst og bor utenfor Norg                                                                                                            |

| Value | Label      | Cases | Percentage |
|-------|------------|-------|------------|
| 0     | Not at all | 16    | 0.3%       |
| 1     | 1          | 65    | 1.4%       |
| 2     | 2          | 7     | 0.1%       |

## File : Norsk medborgerpanel - runde 7

# r7ocreasm1c1: How important is good education in deciding whether someone could come and live here?

| Value | Label | Cases | Percentage |
|-------|-------|-------|------------|
| 3     | 3     | 7     | 0.1%       |
| 4     | 4     | 2     | 0.0%       |
| 5     | 5     | 5     | 0.1%       |
| 6     | 6     | 4     | 0.1%       |
| 7     | 7     | 1     | 0.0%       |
| 8     | 8     | 2     | 0.0%       |
| 9     | 9     | 4     | 0.1%       |
| 10    | 10    | 10    | 0.2%       |
| 11    | 11    | 3     | 0.1%       |
| 12    | 12    | 6     | 0.1%       |
| 13    | 13    | 11    | 0.2%       |
| 14    | 14    | 3     | 0.1%       |
| 15    | 15    | 0     |            |
| 16    | 16    | 2     | 0.0%       |
| 17    | 17    | 3     | 0.1%       |
| 18    | 18    | 4     | 0.1%       |
| 19    | 19    | 2     | 0.0%       |
| 20    | 20    | 2     | 0.0%       |
| 21    | 21    | 0     |            |
| 22    | 22    | 0     |            |
| 23    | 23    | 3     | 0.1%       |
| 24    | 24    | 22    | 0.5%       |
| 25    | 25    | 34    | 0.7%       |
| 26    | 26    | 3     | 0.1%       |
| 27    | 27    | 5     | 0.1%       |
| 28    | 28    | 3     | 0.1%       |
| 29    | 29    | 6     | 0.1%       |
| 30    | 30    | 4     | 0.1%       |
| 31    | 31    | 2     | 0.0%       |
| 32    | 32    | 4     | 0.1%       |
| 33    | 33    | 6     | 0.1%       |
| 34    | 34    | 7     | 0.1%       |
| 35    | 35    | 2     | 0.0%       |
| 36    | 36    | 5     | 0.1%       |
| 37    | 37    | 6     | 0.1%       |
| 38    | 38    | 7     | 0.1%       |
| 39    | 39    | 5     | 0.1%       |
| 40    | 40    | 3     | 0.1%       |
| 41    | 41    | 1     | 0.0%       |
| 42    | 42    | 2     | 0.0%       |
| 43    | 43    | 1     | 0.0%       |
| 44    | 44    | 2     | 0.0%       |
| 45    | 45    | 0     |            |



## File : Norsk medborgerpanel - runde 7

### # r7ocreasm1c1: How important is good education in deciding whether someone could come and live here?

| Value | Label      | Cases | Percentage |
|-------|------------|-------|------------|
| 46    | 46         | 0     |            |
| 47    | 47         | 1     | 0.0%       |
| 48    | 48         | 1     | 0.0%       |
| 49    | 49         | 0     |            |
| 50    | Completely | 11    | 0.2%       |
| 97    | No answer  | 0     |            |
| 98    | Not asked  | 4384  | 93.5%      |

Warning: these figures indicate the number of cases found in the data file. They cannot be interpreted as summary statistics of the population of interest.

### # r7ocreasm1c1\_mobile: How important is good education in deciding whether someone could come and live here?

|                            |                                                                                                                                                                                                                                   |
|----------------------------|-----------------------------------------------------------------------------------------------------------------------------------------------------------------------------------------------------------------------------------|
| Information                | [Type= discrete] [Format=numeric] [Range= 0-50] [Missing=*]                                                                                                                                                                       |
| Statistics [NW/ W]         | [Valid=4689 /-] [Invalid=0 /-]                                                                                                                                                                                                    |
| Literal question           | How important do you think having good educational qualifications should be in deciding whether someone born, brought up and living outside Norway should be able to come and live here?                                          |
| Interviewer's instructions | [Asked if u=2, ran20=3 and R7OCRECSM_mobil=1. Version for mobile users due to layout. Desktop/tablet users are asked R7OCRECSM1C1. ]<br><br>[Slider is used to give answers. Departure position of the marker is set to value 1.] |
| Notes                      | Hvor viktig synes du å ha en god utdanning bør være for å avgjøre om noen som er født, oppvokst og bor utenfor Norg                                                                                                               |

| Value | Label      | Cases | Percentage |
|-------|------------|-------|------------|
| 0     | Not at all | 6     | 0.1%       |
| 1     | 1          | 26    | 0.6%       |
| 2     | 2          | 3     | 0.1%       |
| 3     | 3          | 1     | 0.0%       |
| 4     | 4          | 3     | 0.1%       |
| 5     | 5          | 5     | 0.1%       |
| 6     | 6          | 2     | 0.0%       |
| 7     | 7          | 0     |            |
| 8     | 8          | 3     | 0.1%       |
| 9     | 9          | 0     |            |
| 10    | 10         | 2     | 0.0%       |
| 11    | 11         | 2     | 0.0%       |
| 12    | 12         | 0     |            |
| 13    | 13         | 1     | 0.0%       |
| 14    | 14         | 2     | 0.0%       |
| 15    | 15         | 3     | 0.1%       |
| 16    | 16         | 2     | 0.0%       |
| 17    | 17         | 1     | 0.0%       |
| 18    | 18         | 1     | 0.0%       |
| 19    | 19         | 0     |            |
| 20    | 20         | 0     |            |
| 21    | 21         | 0     |            |
| 22    | 22         | 0     |            |
| 23    | 23         | 1     | 0.0%       |
| 24    | 24         | 2     | 0.0%       |

## File : Norsk medborgerpanel - runde 7

### # r7ocreasm1c1\_mobile: How important is good education in deciding whether someone could come and live here?

| Value | Label      | Cases | Percentage |
|-------|------------|-------|------------|
| 25    | 25         | 3     | 0.1%       |
| 26    | 26         | 2     | 0.0%       |
| 27    | 27         | 1     | 0.0%       |
| 28    | 28         | 1     | 0.0%       |
| 29    | 29         | 1     | 0.0%       |
| 30    | 30         | 5     | 0.1%       |
| 31    | 31         | 2     | 0.0%       |
| 32    | 32         | 0     |            |
| 33    | 33         | 3     | 0.1%       |
| 34    | 34         | 1     | 0.0%       |
| 35    | 35         | 1     | 0.0%       |
| 36    | 36         | 2     | 0.0%       |
| 37    | 37         | 1     | 0.0%       |
| 38    | 38         | 1     | 0.0%       |
| 39    | 39         | 3     | 0.1%       |
| 40    | 40         | 1     | 0.0%       |
| 41    | 41         | 0     |            |
| 42    | 42         | 1     | 0.0%       |
| 43    | 43         | 2     | 0.0%       |
| 44    | 44         | 0     |            |
| 45    | 45         | 1     | 0.0%       |
| 46    | 46         | 0     |            |
| 47    | 47         | 1     | 0.0%       |
| 48    | 48         | 3     | 0.1%       |
| 49    | 49         | 1     | 0.0%       |
| 50    | Completely | 9     | 0.2%       |
| 97    | No answer  | 0     |            |
| 98    | Not asked  | 4577  | 97.6%      |

Warning: these figures indicate the number of cases found in the data file. They cannot be interpreted as summary statistics of the population of interest.

### # r7ocreasm1c2: How important is a Christian background in deciding whether someone could come and live here?

|                                   |                                                                                                                                                                                                                                |
|-----------------------------------|--------------------------------------------------------------------------------------------------------------------------------------------------------------------------------------------------------------------------------|
| <b>Information</b>                | [Type= discrete] [Format=numeric] [Range= 0-50] [Missing=*]                                                                                                                                                                    |
| <b>Statistics [NW/ W]</b>         | [Valid=4689 /-] [Invalid=0 /-]                                                                                                                                                                                                 |
| <b>Literal question</b>           | How important do you think coming from a Christian background should be in deciding whether someone should be able to come and live here?                                                                                      |
| <b>Interviewer's instructions</b> | [Asked if u=2, ran20=3 and R7OCRECSM_mobil=0. Version for desktop and tablet users. Mobile users are asked R7OCRECSM1C2_mobile. ]<br><br>[Slider is used to give answers. Departure position of the marker is set to value 1.] |
| <b>Notes</b>                      | Hvor viktig synes du en kristen bakgrunn bør være for å avgjøre om noen skal få bosette seg her? ^f('R7OCRECSM_skal                                                                                                            |

| Value | Label      | Cases | Percentage |
|-------|------------|-------|------------|
| 0     | Not at all | 28    | 0.6%       |
| 1     | 1          | 174   | 3.7%       |
| 2     | 2          | 9     | 0.2%       |
| 3     | 3          | 4     | 0.1%       |

## File : Norsk medborgerpanel - runde 7

# r7ocrecsm1c2: How important is a Christian background in deciding whether someone could come and live here?

| Value | Label | Cases | Percentage |
|-------|-------|-------|------------|
| 4     | 4     | 1     | 0.0%       |
| 5     | 5     | 7     | 0.1%       |
| 6     | 6     | 6     | 0.1%       |
| 7     | 7     | 4     | 0.1%       |
| 8     | 8     | 4     | 0.1%       |
| 9     | 9     | 3     | 0.1%       |
| 10    | 10    | 1     | 0.0%       |
| 11    | 11    | 2     | 0.0%       |
| 12    | 12    | 1     | 0.0%       |
| 13    | 13    | 3     | 0.1%       |
| 14    | 14    | 1     | 0.0%       |
| 15    | 15    | 1     | 0.0%       |
| 16    | 16    | 1     | 0.0%       |
| 17    | 17    | 1     | 0.0%       |
| 18    | 18    | 1     | 0.0%       |
| 19    | 19    | 1     | 0.0%       |
| 20    | 20    | 0     |            |
| 21    | 21    | 0     |            |
| 22    | 22    | 0     |            |
| 23    | 23    | 0     |            |
| 24    | 24    | 7     | 0.1%       |
| 25    | 25    | 12    | 0.3%       |
| 26    | 26    | 1     | 0.0%       |
| 27    | 27    | 3     | 0.1%       |
| 28    | 28    | 2     | 0.0%       |
| 29    | 29    | 2     | 0.0%       |
| 30    | 30    | 1     | 0.0%       |
| 31    | 31    | 1     | 0.0%       |
| 32    | 32    | 0     |            |
| 33    | 33    | 4     | 0.1%       |
| 34    | 34    | 1     | 0.0%       |
| 35    | 35    | 2     | 0.0%       |
| 36    | 36    | 1     | 0.0%       |
| 37    | 37    | 1     | 0.0%       |
| 38    | 38    | 2     | 0.0%       |
| 39    | 39    | 2     | 0.0%       |
| 40    | 40    | 0     |            |
| 41    | 41    | 0     |            |
| 42    | 42    | 0     |            |
| 43    | 43    | 0     |            |
| 44    | 44    | 3     | 0.1%       |
| 45    | 45    | 0     |            |
| 46    | 46    | 3     | 0.1%       |

## File : Norsk medborgerpanel - runde 7

### # r7ocreasm1c2: How important is a Christian background in deciding whether someone could come and live here?

| Value | Label      | Cases | Percentage |
|-------|------------|-------|------------|
| 47    | 47         | 0     |            |
| 48    | 48         | 1     | 0.0%       |
| 49    | 49         | 1     | 0.0%       |
| 50    | Completely | 2     | 0.0%       |
| 97    | No answer  | 0     |            |
| 98    | Not asked  | 4384  | 93.5%      |

Warning: these figures indicate the number of cases found in the data file. They cannot be interpreted as summary statistics of the population of interest.

### # r7ocreasm1c2\_mobile: How important is a Christian background in deciding whether someone could come and live here?

|                            |                                                                                                                                                                                                                                   |
|----------------------------|-----------------------------------------------------------------------------------------------------------------------------------------------------------------------------------------------------------------------------------|
| Information                | [Type= discrete] [Format=numeric] [Range= 0-50] [Missing=*]                                                                                                                                                                       |
| Statistics [NW/ W]         | [Valid=4689 /-] [Invalid=0 /-]                                                                                                                                                                                                    |
| Literal question           | How important do you think coming from a Christian background should be in deciding whether someone should be able to come and live here?                                                                                         |
| Interviewer's instructions | [Asked if u=2, ran20=3 and R7OCRECSM_mobil=1. Version for mobile users due to layout. Desktop/tablet users are asked R7OCRECSM1C2. ]<br><br>[Slider is used to give answers. Departure position of the marker is set to value 1.] |
| Notes                      | Hvor viktig synes du en kristen bakgrunn bør være for å avgjøre om noen skal få bosette seg her?                                                                                                                                  |

| Value | Label      | Cases | Percentage |
|-------|------------|-------|------------|
| 0     | Not at all | 11    | 0.2%       |
| 1     | 1          | 70    | 1.5%       |
| 2     | 2          | 4     | 0.1%       |
| 3     | 3          | 0     |            |
| 4     | 4          | 0     |            |
| 5     | 5          | 1     | 0.0%       |
| 6     | 6          | 0     |            |
| 7     | 7          | 0     |            |
| 8     | 8          | 1     | 0.0%       |
| 9     | 9          | 0     |            |
| 10    | 10         | 1     | 0.0%       |
| 11    | 11         | 0     |            |
| 12    | 12         | 1     | 0.0%       |
| 13    | 13         | 1     | 0.0%       |
| 14    | 14         | 1     | 0.0%       |
| 15    | 15         | 0     |            |
| 16    | 16         | 1     | 0.0%       |
| 17    | 17         | 2     | 0.0%       |
| 18    | 18         | 1     | 0.0%       |
| 19    | 19         | 0     |            |
| 20    | 20         | 0     |            |
| 21    | 21         | 1     | 0.0%       |
| 22    | 22         | 0     |            |
| 23    | 23         | 0     |            |
| 24    | 24         | 0     |            |

## File : Norsk medborgerpanel - runde 7

# r7ocreasm1c2\_mobile: How important is a Christian background in deciding whether someone could come and live here?

| Value | Label      | Cases | Percentage |
|-------|------------|-------|------------|
| 25    | 25         | 1     | 0.0%       |
| 26    | 26         | 0     |            |
| 27    | 27         | 2     | 0.0%       |
| 28    | 28         | 0     |            |
| 29    | 29         | 0     |            |
| 30    | 30         | 2     | 0.0%       |
| 31    | 31         | 1     | 0.0%       |
| 32    | 32         | 0     |            |
| 33    | 33         | 0     |            |
| 34    | 34         | 0     |            |
| 35    | 35         | 1     | 0.0%       |
| 36    | 36         | 0     |            |
| 37    | 37         | 3     | 0.1%       |
| 38    | 38         | 0     |            |
| 39    | 39         | 1     | 0.0%       |
| 40    | 40         | 0     |            |
| 41    | 41         | 0     |            |
| 42    | 42         | 0     |            |
| 43    | 43         | 0     |            |
| 44    | 44         | 1     | 0.0%       |
| 45    | 45         | 1     | 0.0%       |
| 46    | 46         | 0     |            |
| 47    | 47         | 0     |            |
| 48    | 48         | 0     |            |
| 49    | 49         | 0     |            |
| 50    | Completely | 3     | 0.1%       |
| 97    | No answer  | 0     |            |
| 98    | Not asked  | 4577  | 97.6%      |

Warning: these figures indicate the number of cases found in the data file. They cannot be interpreted as summary statistics of the population of interest.

# r7ocreasm1c3: How important is having skills that Norway needs in deciding whether someone could come and live here?

|                            |                                                                                                                                                                                                                                |
|----------------------------|--------------------------------------------------------------------------------------------------------------------------------------------------------------------------------------------------------------------------------|
| Information                | [Type= discrete] [Format=numeric] [Range= 0-50] [Missing=*]                                                                                                                                                                    |
| Statistics [NW/ W]         | [Valid=4689 /-] [Invalid=0 /-]                                                                                                                                                                                                 |
| Literal question           | How important do you think having work skills that Norway needs should be in deciding whether someone should be able to come and live here?                                                                                    |
| Interviewer's instructions | [Asked if u=2, ran20=3 and R7OCRECSM_mobil=0. Version for desktop and tablet users. Mobile users are asked R7OCRECSM1C3_mobile. ]<br><br>[Slider is used to give answers. Departure position of the marker is set to value 1.] |
| Notes                      | Hvor viktig synes du kunnskaper og ferdigheter som Norge trenger bør være for å avgjøre om noen skal få bosette seg                                                                                                            |

| Value | Label      | Cases | Percentage |
|-------|------------|-------|------------|
| 0     | Not at all | 8     | 0.2%       |
| 1     | 1          | 57    | 1.2%       |

## File : Norsk medborgerpanel - runde 7

# r7ocrecsm1c3: How important is having skills that Norway needs in deciding whether someone could come and live here?

| Value | Label | Cases | Percentage |
|-------|-------|-------|------------|
| 2     | 2     | 3     | 0.1%       |
| 3     | 3     | 5     | 0.1%       |
| 4     | 4     | 4     | 0.1%       |
| 5     | 5     | 3     | 0.1%       |
| 6     | 6     | 10    | 0.2%       |
| 7     | 7     | 3     | 0.1%       |
| 8     | 8     | 4     | 0.1%       |
| 9     | 9     | 6     | 0.1%       |
| 10    | 10    | 3     | 0.1%       |
| 11    | 11    | 7     | 0.1%       |
| 12    | 12    | 9     | 0.2%       |
| 13    | 13    | 4     | 0.1%       |
| 14    | 14    | 8     | 0.2%       |
| 15    | 15    | 3     | 0.1%       |
| 16    | 16    | 2     | 0.0%       |
| 17    | 17    | 2     | 0.0%       |
| 18    | 18    | 3     | 0.1%       |
| 19    | 19    | 2     | 0.0%       |
| 20    | 20    | 2     | 0.0%       |
| 21    | 21    | 2     | 0.0%       |
| 22    | 22    | 3     | 0.1%       |
| 23    | 23    | 5     | 0.1%       |
| 24    | 24    | 14    | 0.3%       |
| 25    | 25    | 32    | 0.7%       |
| 26    | 26    | 4     | 0.1%       |
| 27    | 27    | 6     | 0.1%       |
| 28    | 28    | 3     | 0.1%       |
| 29    | 29    | 6     | 0.1%       |
| 30    | 30    | 3     | 0.1%       |
| 31    | 31    | 5     | 0.1%       |
| 32    | 32    | 3     | 0.1%       |
| 33    | 33    | 8     | 0.2%       |
| 34    | 34    | 2     | 0.0%       |
| 35    | 35    | 3     | 0.1%       |
| 36    | 36    | 7     | 0.1%       |
| 37    | 37    | 7     | 0.1%       |
| 38    | 38    | 6     | 0.1%       |
| 39    | 39    | 5     | 0.1%       |
| 40    | 40    | 2     | 0.0%       |
| 41    | 41    | 5     | 0.1%       |
| 42    | 42    | 0     |            |
| 43    | 43    | 2     | 0.0%       |
| 44    | 44    | 3     | 0.1%       |

## File : Norsk medborgerpanel - runde 7

# r7ocreasm1c3: How important is having skills that Norway needs in deciding whether someone could come and live here?

| Value | Label      | Cases | Percentage |
|-------|------------|-------|------------|
| 45    | 45         | 0     |            |
| 46    | 46         | 2     | 0.0%       |
| 47    | 47         | 1     | 0.0%       |
| 48    | 48         | 0     |            |
| 49    | 49         | 1     | 0.0%       |
| 50    | Completely | 17    | 0.4%       |
| 97    | No answer  | 0     |            |
| 98    | Not asked  | 4384  | 93.5%      |

Warning: these figures indicate the number of cases found in the data file. They cannot be interpreted as summary statistics of the population of interest.

# r7ocreasm1c3\_mobile: How important is having skills that Norway needs in deciding whether someone could come and live here?

|                            |                                                                                                                                                                                                                                   |
|----------------------------|-----------------------------------------------------------------------------------------------------------------------------------------------------------------------------------------------------------------------------------|
| Information                | [Type= discrete] [Format=numeric] [Range= 0-50] [Missing=*]                                                                                                                                                                       |
| Statistics [NW/ W]         | [Valid=4689 /-] [Invalid=0 /-]                                                                                                                                                                                                    |
| Literal question           | How important do you think having work skills that Norway needs should be in deciding whether someone should be able to come and live here?                                                                                       |
| Interviewer's instructions | [Asked if u=2, ran20=3 and R7OCRECSM_mobil=1. Version for mobile users due to layout. Desktop/tablet users are asked R7OCRECSM1C3. ]<br><br>[Slider is used to give answers. Departure position of the marker is set to value 1.] |
| Notes                      | Hvor viktig synes du kunnskaper og ferdigheter som Norge trenger bør være for å avgjøre om noen skal få bosette seg                                                                                                               |

| Value | Label      | Cases | Percentage |
|-------|------------|-------|------------|
| 0     | Not at all | 3     | 0.1%       |
| 1     | 1          | 17    | 0.4%       |
| 2     | 2          | 1     | 0.0%       |
| 3     | 3          | 3     | 0.1%       |
| 4     | 4          | 0     |            |
| 5     | 5          | 2     | 0.0%       |
| 6     | 6          | 1     | 0.0%       |
| 7     | 7          | 2     | 0.0%       |
| 8     | 8          | 1     | 0.0%       |
| 9     | 9          | 0     |            |
| 10    | 10         | 5     | 0.1%       |
| 11    | 11         | 3     | 0.1%       |
| 12    | 12         | 1     | 0.0%       |
| 13    | 13         | 4     | 0.1%       |
| 14    | 14         | 2     | 0.0%       |
| 15    | 15         | 3     | 0.1%       |
| 16    | 16         | 3     | 0.1%       |
| 17    | 17         | 1     | 0.0%       |
| 18    | 18         | 3     | 0.1%       |
| 19    | 19         | 0     |            |
| 20    | 20         | 3     | 0.1%       |
| 21    | 21         | 2     | 0.0%       |

## File : Norsk medborgerpanel - runde 7

# r7ocreasm1c3\_mobile: How important is having skills that Norway needs in deciding whether someone could come and live here?

| Value | Label      | Cases | Percentage |
|-------|------------|-------|------------|
| 22    | 22         | 1     | 0.0%       |
| 23    | 23         | 0     |            |
| 24    | 24         | 1     | 0.0%       |
| 25    | 25         | 0     |            |
| 26    | 26         | 0     |            |
| 27    | 27         | 3     | 0.1%       |
| 28    | 28         | 2     | 0.0%       |
| 29    | 29         | 2     | 0.0%       |
| 30    | 30         | 5     | 0.1%       |
| 31    | 31         | 3     | 0.1%       |
| 32    | 32         | 0     |            |
| 33    | 33         | 2     | 0.0%       |
| 34    | 34         | 0     |            |
| 35    | 35         | 2     | 0.0%       |
| 36    | 36         | 3     | 0.1%       |
| 37    | 37         | 6     | 0.1%       |
| 38    | 38         | 2     | 0.0%       |
| 39    | 39         | 2     | 0.0%       |
| 40    | 40         | 0     |            |
| 41    | 41         | 1     | 0.0%       |
| 42    | 42         | 1     | 0.0%       |
| 43    | 43         | 0     |            |
| 44    | 44         | 0     |            |
| 45    | 45         | 1     | 0.0%       |
| 46    | 46         | 0     |            |
| 47    | 47         | 3     | 0.1%       |
| 48    | 48         | 0     |            |
| 49    | 49         | 0     |            |
| 50    | Completely | 12    | 0.3%       |
| 97    | No answer  | 0     |            |
| 98    | Not asked  | 4577  | 97.6%      |

Warning: these figures indicate the number of cases found in the data file. They cannot be interpreted as summary statistics of the population of interest.

# r7ocreasm2a1\_1: To what extent should the Supreme Court's power in controversial issues be reduced?

| Information                | [Type= discrete] [Format=numeric] [Range= 1-5] [Missing=*]                                                                                     |       |            |
|----------------------------|------------------------------------------------------------------------------------------------------------------------------------------------|-------|------------|
| Statistics [NW/ W]         | [Valid=4689 /-] [Invalid=0 /-]                                                                                                                 |       |            |
| Literal question           | In general, to what extent do you think the Norwegian Supreme Court's power to decide certain types of controversial issues should be reduced? |       |            |
| Interviewer's instructions | [Asked if ran20=1 . ]                                                                                                                          |       |            |
| Notes                      | R7OCRECSM2A1_1 (Generelt sett, i hvilken grad mener du at Norges Høyesteretts makt til å avgjøre visse typer kontrover                         |       |            |
| Value                      | Label                                                                                                                                          | Cases | Percentage |
| 1                          | Not at all                                                                                                                                     | 123   | 2.6%       |
| 2                          | 2                                                                                                                                              | 76    | 1.6%       |



## File : Norsk medborgerpanel - runde 7

### # r7ocreasm2a1\_1: To what extent should the Supreme Court's power in controversial issues be reduced?

| Value | Label      | Cases | Percentage |
|-------|------------|-------|------------|
| 3     | 3          | 114   | 2.4%       |
| 4     | 4          | 33    | 0.7%       |
| 5     | Completely | 8     | 0.2%       |
| 97    | No answer  | 18    | 0.4%       |
| 98    | Not asked  | 4317  | 92.1%      |

Warning: these figures indicate the number of cases found in the data file. They cannot be interpreted as summary statistics of the population of interest.

### # r7ocreasm2a2\_1: To what extent does the Supreme Court favor certain groups?

|                                   |                                                                                                                         |
|-----------------------------------|-------------------------------------------------------------------------------------------------------------------------|
| <b>Information</b>                | [Type= discrete] [Format=numeric] [Range= 1-5] [Missing=*]                                                              |
| <b>Statistics [NW/ W]</b>         | [Valid=4689 /-] [Invalid=0 /-]                                                                                          |
| <b>Literal question</b>           | To what extent do you think the decisions of the Norwegian Supreme Court favor certain groups more than others?         |
| <b>Interviewer's instructions</b> | [Asked if ran20=1 . ]                                                                                                   |
| <b>Notes</b>                      | R7OCRECSM2A2_1 (I hvilken grad mener du at avgjørelsene til Norges Høyesterett favoriserer enkelte grupper mer enn andr |

| Value | Label      | Cases | Percentage |
|-------|------------|-------|------------|
| 1     | Not at all | 91    | 1.9%       |
| 2     | 2          | 90    | 1.9%       |
| 3     | 3          | 136   | 2.9%       |
| 4     | 4          | 27    | 0.6%       |
| 5     | Completely | 7     | 0.1%       |
| 97    | No answer  | 21    | 0.4%       |
| 98    | Not asked  | 4317  | 92.1%      |

Warning: these figures indicate the number of cases found in the data file. They cannot be interpreted as summary statistics of the population of interest.

### # r7ocreasm2a3\_1: To what extent could the Supreme Court be dissolved, if it makes several decisions most people disagree with?

|                                   |                                                                                                                                                                                       |
|-----------------------------------|---------------------------------------------------------------------------------------------------------------------------------------------------------------------------------------|
| <b>Information</b>                | [Type= discrete] [Format=numeric] [Range= 1-5] [Missing=*]                                                                                                                            |
| <b>Statistics [NW/ W]</b>         | [Valid=4689 /-] [Invalid=0 /-]                                                                                                                                                        |
| <b>Literal question</b>           | And to what extent do you think that If the Norwegian Supreme Court starts to make several decisions that most people disagree with, the institution might just as well be dissolved? |
| <b>Interviewer's instructions</b> | [Asked if ran20=1 . ]                                                                                                                                                                 |
| <b>Notes</b>                      | R7OCRECSM2A3_1 (Og i hvilken grad mener du at dersom Norges Høyesterett begynner å ta mange avgjørelser som folk flest                                                                |

| Value | Label      | Cases | Percentage |
|-------|------------|-------|------------|
| 1     | Not at all | 152   | 3.2%       |
| 2     | 2          | 81    | 1.7%       |
| 3     | 3          | 85    | 1.8%       |
| 4     | 4          | 33    | 0.7%       |
| 5     | Completely | 7     | 0.1%       |
| 97    | No answer  | 14    | 0.3%       |
| 98    | Not asked  | 4317  | 92.1%      |

Warning: these figures indicate the number of cases found in the data file. They cannot be interpreted as summary statistics of the population of interest.

### # r7ocreasm2b1: To what extent should the Supreme Court's power in controversial issues be reduced?

|                    |                                                             |
|--------------------|-------------------------------------------------------------|
| <b>Information</b> | [Type= discrete] [Format=numeric] [Range= 0-50] [Missing=*] |
|--------------------|-------------------------------------------------------------|

## File : Norsk medborgerpanel - runde 7

### # r7ocrecsm2b1: To what extent should the Supreme Court's power in controversial issues be reduced?

|                                   |                                                                                                                                                                                                                                 |
|-----------------------------------|---------------------------------------------------------------------------------------------------------------------------------------------------------------------------------------------------------------------------------|
| <b>Statistics [NW/ W]</b>         | [Valid=4689 /-] [Invalid=0 /-]                                                                                                                                                                                                  |
| <b>Literal question</b>           | In general, to what extent do you think the Norwegian Supreme Court's power to decide certain types of controversial issues should be reduced?                                                                                  |
| <b>Interviewer's instructions</b> | [Asked if u=2, ran20=2 and R7OCRECSM_mobil=0. Version for desktop and tablet users. Mobile users are asked R7OCRECSM2B1_mobile. ]<br><br>[Slider is used to give answers. Departure position of the marker is set to value 25.] |
| <b>Notes</b>                      | Generelt sett, i hvilken grad mener du at Norges Høyesteretts makt til å avgjøre visse typer kontroversielle saker bør                                                                                                          |

| Value | Label      | Cases | Percentage |
|-------|------------|-------|------------|
| 0     | Not at all | 33    | 0.7%       |
| 1     | 1          | 5     | 0.1%       |
| 2     | 2          | 5     | 0.1%       |
| 3     | 3          | 4     | 0.1%       |
| 4     | 4          | 5     | 0.1%       |
| 5     | 5          | 5     | 0.1%       |
| 6     | 6          | 10    | 0.2%       |
| 7     | 7          | 4     | 0.1%       |
| 8     | 8          | 9     | 0.2%       |
| 9     | 9          | 5     | 0.1%       |
| 10    | 10         | 5     | 0.1%       |
| 11    | 11         | 10    | 0.2%       |
| 12    | 12         | 11    | 0.2%       |
| 13    | 13         | 7     | 0.1%       |
| 14    | 14         | 6     | 0.1%       |
| 15    | 15         | 8     | 0.2%       |
| 16    | 16         | 3     | 0.1%       |
| 17    | 17         | 5     | 0.1%       |
| 18    | 18         | 2     | 0.0%       |
| 19    | 19         | 8     | 0.2%       |
| 20    | 20         | 4     | 0.1%       |
| 21    | 21         | 2     | 0.0%       |
| 22    | 22         | 4     | 0.1%       |
| 23    | 23         | 3     | 0.1%       |
| 24    | 24         | 6     | 0.1%       |
| 25    | 25         | 92    | 2.0%       |
| 26    | 26         | 1     | 0.0%       |
| 27    | 27         | 5     | 0.1%       |
| 28    | 28         | 2     | 0.0%       |
| 29    | 29         | 3     | 0.1%       |
| 30    | 30         | 1     | 0.0%       |
| 31    | 31         | 3     | 0.1%       |
| 32    | 32         | 3     | 0.1%       |
| 33    | 33         | 3     | 0.1%       |
| 34    | 34         | 1     | 0.0%       |
| 35    | 35         | 1     | 0.0%       |

## File : Norsk medborgerpanel - runde 7

### # r7ocreasm2b1: To what extent should the Supreme Court's power in controversial issues be reduced?

| Value | Label      | Cases | Percentage |
|-------|------------|-------|------------|
| 36    | 36         | 1     | 0.0%       |
| 37    | 37         | 1     | 0.0%       |
| 38    | 38         | 2     | 0.0%       |
| 39    | 39         | 2     | 0.0%       |
| 40    | 40         | 1     | 0.0%       |
| 41    | 41         | 0     |            |
| 42    | 42         | 3     | 0.1%       |
| 43    | 43         | 1     | 0.0%       |
| 44    | 44         | 0     |            |
| 45    | 45         | 0     |            |
| 46    | 46         | 0     |            |
| 47    | 47         | 0     |            |
| 48    | 48         | 0     |            |
| 49    | 49         | 1     | 0.0%       |
| 50    | Completely | 4     | 0.1%       |
| 97    | No answer  | 0     |            |
| 98    | Not asked  | 4389  | 93.6%      |

Warning: these figures indicate the number of cases found in the data file. They cannot be interpreted as summary statistics of the population of interest.

### # r7ocreasm2b1\_mobile: To what extent should the Supreme Court's power in controversial issues be reduced?

|                                   |                                                                                                                                                                                                                                    |
|-----------------------------------|------------------------------------------------------------------------------------------------------------------------------------------------------------------------------------------------------------------------------------|
| <b>Information</b>                | [Type= discrete] [Format=numeric] [Range= 0-50] [Missing=*]                                                                                                                                                                        |
| <b>Statistics [NW/ W]</b>         | [Valid=4689 /-] [Invalid=0 /-]                                                                                                                                                                                                     |
| <b>Literal question</b>           | In general, to what extent do you think the Norwegian Supreme Court's power to decide certain types of controversial issues should be reduced?                                                                                     |
| <b>Interviewer's instructions</b> | [Asked if u=2, ran20=2 and R7OCRECSM_mobil=1. Version for mobile users due to layout. Desktop/tablet users are asked R7OCRECSM2B1. ]<br><br>[Slider is used to give answers. Departure position of the marker is set to value 25.] |
| <b>Notes</b>                      | Generelt sett, i hvilken grad mener du at Norges Høyesteretts makt til å avgjøre visse typer kontroversielle saker bør                                                                                                             |

| Value | Label      | Cases | Percentage |
|-------|------------|-------|------------|
| 0     | Not at all | 12    | 0.3%       |
| 1     | 1          | 2     | 0.0%       |
| 2     | 2          | 0     |            |
| 3     | 3          | 1     | 0.0%       |
| 4     | 4          | 0     |            |
| 5     | 5          | 2     | 0.0%       |
| 6     | 6          | 2     | 0.0%       |
| 7     | 7          | 0     |            |
| 8     | 8          | 3     | 0.1%       |
| 9     | 9          | 3     | 0.1%       |
| 10    | 10         | 3     | 0.1%       |
| 11    | 11         | 1     | 0.0%       |
| 12    | 12         | 3     | 0.1%       |
| 13    | 13         | 3     | 0.1%       |
| 14    | 14         | 3     | 0.1%       |

## File : Norsk medborgerpanel - runde 7

# r7ocreasm2b1\_mobile: To what extent should the Supreme Court's power in controversial issues be reduced?

| Value | Label      | Cases | Percentage |
|-------|------------|-------|------------|
| 15    | 15         | 2     | 0.0%       |
| 16    | 16         | 2     | 0.0%       |
| 17    | 17         | 2     | 0.0%       |
| 18    | 18         | 2     | 0.0%       |
| 19    | 19         | 0     |            |
| 20    | 20         | 0     |            |
| 21    | 21         | 0     |            |
| 22    | 22         | 2     | 0.0%       |
| 23    | 23         | 0     |            |
| 24    | 24         | 0     |            |
| 25    | 25         | 37    | 0.8%       |
| 26    | 26         | 1     | 0.0%       |
| 27    | 27         | 2     | 0.0%       |
| 28    | 28         | 0     |            |
| 29    | 29         | 2     | 0.0%       |
| 30    | 30         | 1     | 0.0%       |
| 31    | 31         | 1     | 0.0%       |
| 32    | 32         | 3     | 0.1%       |
| 33    | 33         | 1     | 0.0%       |
| 34    | 34         | 1     | 0.0%       |
| 35    | 35         | 1     | 0.0%       |
| 36    | 36         | 1     | 0.0%       |
| 37    | 37         | 0     |            |
| 38    | 38         | 2     | 0.0%       |
| 39    | 39         | 0     |            |
| 40    | 40         | 1     | 0.0%       |
| 41    | 41         | 1     | 0.0%       |
| 42    | 42         | 0     |            |
| 43    | 43         | 2     | 0.0%       |
| 44    | 44         | 1     | 0.0%       |
| 45    | 45         | 1     | 0.0%       |
| 46    | 46         | 0     |            |
| 47    | 47         | 0     |            |
| 48    | 48         | 1     | 0.0%       |
| 49    | 49         | 1     | 0.0%       |
| 50    | Completely | 1     | 0.0%       |
| 97    | No answer  | 0     |            |
| 98    | Not asked  | 4579  | 97.7%      |

*Warning: these figures indicate the number of cases found in the data file. They cannot be interpreted as summary statistics of the population of interest.*

| # r7ocreasm2b2: To what extent does the Supreme Court favor certain groups? |                                                                                                                                                                                                                                 |       |            |
|-----------------------------------------------------------------------------|---------------------------------------------------------------------------------------------------------------------------------------------------------------------------------------------------------------------------------|-------|------------|
| Information                                                                 | [Type= discrete] [Format=numeric] [Range= 0-50] [Missing=*]                                                                                                                                                                     |       |            |
| Statistics [NW/ W]                                                          | [Valid=4689 /-] [Invalid=0 /-]                                                                                                                                                                                                  |       |            |
| Literal question                                                            | To what extent do you think the decisions of the Norwegian Supreme Court favor certain groups more than others?                                                                                                                 |       |            |
| Interviewer's instructions                                                  | [Asked if u=2, ran20=2 and R7OCRECSM_mobil=0. Version for desktop and tablet users. Mobile users are asked R7OCRECSM2B2_mobile. ]<br><br>[Slider is used to give answers. Departure position of the marker is set to value 25.] |       |            |
| Notes                                                                       | I hvilken grad mener du at avgjørelsene til Norges Høyesterett favoriserer enkelte grupper mer enn andre? ^f('R7OCRECS                                                                                                          |       |            |
| Value                                                                       | Label                                                                                                                                                                                                                           | Cases | Percentage |
| 0                                                                           | Not at all                                                                                                                                                                                                                      | 24    | 0.5%       |
| 1                                                                           | 1                                                                                                                                                                                                                               | 5     | 0.1%       |
| 2                                                                           | 2                                                                                                                                                                                                                               | 5     | 0.1%       |
| 3                                                                           | 3                                                                                                                                                                                                                               | 8     | 0.2%       |
| 4                                                                           | 4                                                                                                                                                                                                                               | 8     | 0.2%       |
| 5                                                                           | 5                                                                                                                                                                                                                               | 4     | 0.1%       |
| 6                                                                           | 6                                                                                                                                                                                                                               | 7     | 0.1%       |
| 7                                                                           | 7                                                                                                                                                                                                                               | 7     | 0.1%       |
| 8                                                                           | 8                                                                                                                                                                                                                               | 5     | 0.1%       |
| 9                                                                           | 9                                                                                                                                                                                                                               | 6     | 0.1%       |
| 10                                                                          | 10                                                                                                                                                                                                                              | 3     | 0.1%       |
| 11                                                                          | 11                                                                                                                                                                                                                              | 7     | 0.1%       |
| 12                                                                          | 12                                                                                                                                                                                                                              | 3     | 0.1%       |
| 13                                                                          | 13                                                                                                                                                                                                                              | 7     | 0.1%       |
| 14                                                                          | 14                                                                                                                                                                                                                              | 7     | 0.1%       |
| 15                                                                          | 15                                                                                                                                                                                                                              | 6     | 0.1%       |
| 16                                                                          | 16                                                                                                                                                                                                                              | 6     | 0.1%       |
| 17                                                                          | 17                                                                                                                                                                                                                              | 5     | 0.1%       |
| 18                                                                          | 18                                                                                                                                                                                                                              | 4     | 0.1%       |
| 19                                                                          | 19                                                                                                                                                                                                                              | 2     | 0.0%       |
| 20                                                                          | 20                                                                                                                                                                                                                              | 2     | 0.0%       |
| 21                                                                          | 21                                                                                                                                                                                                                              | 3     | 0.1%       |
| 22                                                                          | 22                                                                                                                                                                                                                              | 1     | 0.0%       |
| 23                                                                          | 23                                                                                                                                                                                                                              | 3     | 0.1%       |
| 24                                                                          | 24                                                                                                                                                                                                                              | 3     | 0.1%       |
| 25                                                                          | 25                                                                                                                                                                                                                              | 106   | 2.3%       |
| 26                                                                          | 26                                                                                                                                                                                                                              | 1     | 0.0%       |
| 27                                                                          | 27                                                                                                                                                                                                                              | 7     | 0.1%       |
| 28                                                                          | 28                                                                                                                                                                                                                              | 4     | 0.1%       |
| 29                                                                          | 29                                                                                                                                                                                                                              | 6     | 0.1%       |
| 30                                                                          | 30                                                                                                                                                                                                                              | 4     | 0.1%       |
| 31                                                                          | 31                                                                                                                                                                                                                              | 8     | 0.2%       |
| 32                                                                          | 32                                                                                                                                                                                                                              | 2     | 0.0%       |
| 33                                                                          | 33                                                                                                                                                                                                                              | 6     | 0.1%       |
| 34                                                                          | 34                                                                                                                                                                                                                              | 3     | 0.1%       |
| 35                                                                          | 35                                                                                                                                                                                                                              | 2     | 0.0%       |
| 36                                                                          | 36                                                                                                                                                                                                                              | 4     | 0.1%       |

| # r7ocreasm2b2: To what extent does the Supreme Court favor certain groups?                                                                                 |                                                                                                                                                                                                                                    |       |            |
|-------------------------------------------------------------------------------------------------------------------------------------------------------------|------------------------------------------------------------------------------------------------------------------------------------------------------------------------------------------------------------------------------------|-------|------------|
| Value                                                                                                                                                       | Label                                                                                                                                                                                                                              | Cases | Percentage |
| 37                                                                                                                                                          | 37                                                                                                                                                                                                                                 | 0     |            |
| 38                                                                                                                                                          | 38                                                                                                                                                                                                                                 | 1     | 0.0%       |
| 39                                                                                                                                                          | 39                                                                                                                                                                                                                                 | 2     | 0.0%       |
| 40                                                                                                                                                          | 40                                                                                                                                                                                                                                 | 0     |            |
| 41                                                                                                                                                          | 41                                                                                                                                                                                                                                 | 0     |            |
| 42                                                                                                                                                          | 42                                                                                                                                                                                                                                 | 0     |            |
| 43                                                                                                                                                          | 43                                                                                                                                                                                                                                 | 1     | 0.0%       |
| 44                                                                                                                                                          | 44                                                                                                                                                                                                                                 | 1     | 0.0%       |
| 45                                                                                                                                                          | 45                                                                                                                                                                                                                                 | 0     |            |
| 46                                                                                                                                                          | 46                                                                                                                                                                                                                                 | 0     |            |
| 47                                                                                                                                                          | 47                                                                                                                                                                                                                                 | 0     |            |
| 48                                                                                                                                                          | 48                                                                                                                                                                                                                                 | 0     |            |
| 49                                                                                                                                                          | 49                                                                                                                                                                                                                                 | 0     |            |
| 50                                                                                                                                                          | Completely                                                                                                                                                                                                                         | 1     | 0.0%       |
| 97                                                                                                                                                          | No answer                                                                                                                                                                                                                          | 0     |            |
| 98                                                                                                                                                          | Not asked                                                                                                                                                                                                                          | 4389  | 93.6%      |
| Warning: these figures indicate the number of cases found in the data file. They cannot be interpreted as summary statistics of the population of interest. |                                                                                                                                                                                                                                    |       |            |
| # r7ocreasm2b2_mobile: To what extent does the Supreme Court favor certain groups?                                                                          |                                                                                                                                                                                                                                    |       |            |
| Information                                                                                                                                                 | [Type= discrete] [Format=numeric] [Range= 0-50] [Missing=*]                                                                                                                                                                        |       |            |
| Statistics [NW/ W]                                                                                                                                          | [Valid=4689 /-] [Invalid=0 /-]                                                                                                                                                                                                     |       |            |
| Literal question                                                                                                                                            | To what extent do you think the decisions of the Norwegian Supreme Court favor certain groups more than others?                                                                                                                    |       |            |
| Interviewer's instructions                                                                                                                                  | [Asked if u=2, ran20=2 and R7OCRECSM_mobil=1. Version for mobile users due to layout. Desktop/tablet users are asked R7OCRECSM2B2. ]<br><br>[Slider is used to give answers. Departure position of the marker is set to value 25.] |       |            |
| Notes                                                                                                                                                       | I hvilken grad mener du at avgjørelsene til Norges Høyesterett favoriserer enkelte grupper mer enn andre?                                                                                                                          |       |            |
| Value                                                                                                                                                       | Label                                                                                                                                                                                                                              | Cases | Percentage |
| 0                                                                                                                                                           | Not at all                                                                                                                                                                                                                         | 7     | 0.1%       |
| 1                                                                                                                                                           | 1                                                                                                                                                                                                                                  | 2     | 0.0%       |
| 2                                                                                                                                                           | 2                                                                                                                                                                                                                                  | 1     | 0.0%       |
| 3                                                                                                                                                           | 3                                                                                                                                                                                                                                  | 0     |            |
| 4                                                                                                                                                           | 4                                                                                                                                                                                                                                  | 3     | 0.1%       |
| 5                                                                                                                                                           | 5                                                                                                                                                                                                                                  | 2     | 0.0%       |
| 6                                                                                                                                                           | 6                                                                                                                                                                                                                                  | 3     | 0.1%       |
| 7                                                                                                                                                           | 7                                                                                                                                                                                                                                  | 0     |            |
| 8                                                                                                                                                           | 8                                                                                                                                                                                                                                  | 1     | 0.0%       |
| 9                                                                                                                                                           | 9                                                                                                                                                                                                                                  | 0     |            |
| 10                                                                                                                                                          | 10                                                                                                                                                                                                                                 | 1     | 0.0%       |
| 11                                                                                                                                                          | 11                                                                                                                                                                                                                                 | 1     | 0.0%       |
| 12                                                                                                                                                          | 12                                                                                                                                                                                                                                 | 2     | 0.0%       |
| 13                                                                                                                                                          | 13                                                                                                                                                                                                                                 | 3     | 0.1%       |
| 14                                                                                                                                                          | 14                                                                                                                                                                                                                                 | 1     | 0.0%       |
| 15                                                                                                                                                          | 15                                                                                                                                                                                                                                 | 1     | 0.0%       |
| 16                                                                                                                                                          | 16                                                                                                                                                                                                                                 | 1     | 0.0%       |
| 17                                                                                                                                                          | 17                                                                                                                                                                                                                                 | 1     | 0.0%       |

| # r7ocreasm2b2_mobile: To what extent does the Supreme Court favor certain groups?                                                                          |                                                                                                                                                                                       |       |            |
|-------------------------------------------------------------------------------------------------------------------------------------------------------------|---------------------------------------------------------------------------------------------------------------------------------------------------------------------------------------|-------|------------|
| Value                                                                                                                                                       | Label                                                                                                                                                                                 | Cases | Percentage |
| 18                                                                                                                                                          | 18                                                                                                                                                                                    | 0     |            |
| 19                                                                                                                                                          | 19                                                                                                                                                                                    | 0     |            |
| 20                                                                                                                                                          | 20                                                                                                                                                                                    | 0     |            |
| 21                                                                                                                                                          | 21                                                                                                                                                                                    | 2     | 0.0%       |
| 22                                                                                                                                                          | 22                                                                                                                                                                                    | 0     |            |
| 23                                                                                                                                                          | 23                                                                                                                                                                                    | 1     | 0.0%       |
| 24                                                                                                                                                          | 24                                                                                                                                                                                    | 1     | 0.0%       |
| 25                                                                                                                                                          | 25                                                                                                                                                                                    | 53    | 1.1%       |
| 26                                                                                                                                                          | 26                                                                                                                                                                                    | 1     | 0.0%       |
| 27                                                                                                                                                          | 27                                                                                                                                                                                    | 1     | 0.0%       |
| 28                                                                                                                                                          | 28                                                                                                                                                                                    | 0     |            |
| 29                                                                                                                                                          | 29                                                                                                                                                                                    | 1     | 0.0%       |
| 30                                                                                                                                                          | 30                                                                                                                                                                                    | 2     | 0.0%       |
| 31                                                                                                                                                          | 31                                                                                                                                                                                    | 0     |            |
| 32                                                                                                                                                          | 32                                                                                                                                                                                    | 1     | 0.0%       |
| 33                                                                                                                                                          | 33                                                                                                                                                                                    | 3     | 0.1%       |
| 34                                                                                                                                                          | 34                                                                                                                                                                                    | 3     | 0.1%       |
| 35                                                                                                                                                          | 35                                                                                                                                                                                    | 1     | 0.0%       |
| 36                                                                                                                                                          | 36                                                                                                                                                                                    | 0     |            |
| 37                                                                                                                                                          | 37                                                                                                                                                                                    | 1     | 0.0%       |
| 38                                                                                                                                                          | 38                                                                                                                                                                                    | 2     | 0.0%       |
| 39                                                                                                                                                          | 39                                                                                                                                                                                    | 1     | 0.0%       |
| 40                                                                                                                                                          | 40                                                                                                                                                                                    | 0     |            |
| 41                                                                                                                                                          | 41                                                                                                                                                                                    | 1     | 0.0%       |
| 42                                                                                                                                                          | 42                                                                                                                                                                                    | 0     |            |
| 43                                                                                                                                                          | 43                                                                                                                                                                                    | 1     | 0.0%       |
| 44                                                                                                                                                          | 44                                                                                                                                                                                    | 0     |            |
| 45                                                                                                                                                          | 45                                                                                                                                                                                    | 0     |            |
| 46                                                                                                                                                          | 46                                                                                                                                                                                    | 0     |            |
| 47                                                                                                                                                          | 47                                                                                                                                                                                    | 0     |            |
| 48                                                                                                                                                          | 48                                                                                                                                                                                    | 1     | 0.0%       |
| 49                                                                                                                                                          | 49                                                                                                                                                                                    | 0     |            |
| 50                                                                                                                                                          | Completely                                                                                                                                                                            | 3     | 0.1%       |
| 97                                                                                                                                                          | No answer                                                                                                                                                                             | 0     |            |
| 98                                                                                                                                                          | Not asked                                                                                                                                                                             | 4579  | 97.7%      |
| Warning: these figures indicate the number of cases found in the data file. They cannot be interpreted as summary statistics of the population of interest. |                                                                                                                                                                                       |       |            |
| # r7ocreasm2b3: To what extent could the Supreme Court be dissolved, if it makes several decisions most people disagree with?                               |                                                                                                                                                                                       |       |            |
| Information                                                                                                                                                 | [Type= discrete] [Format=numeric] [Range= 0-50] [Missing=*]                                                                                                                           |       |            |
| Statistics [NW/ W]                                                                                                                                          | [Valid=4689 /-] [Invalid=0 /-]                                                                                                                                                        |       |            |
| Literal question                                                                                                                                            | And to what extent do you think that If the Norwegian Supreme Court starts to make several decisions that most people disagree with, the institution might just as well be dissolved? |       |            |
| Interviewer's instructions                                                                                                                                  | [Asked if u=2, ran20=2 and R7OCRECSM_mobil=0. Version for desktop and tablet users. Mobile users are asked R7OCRECSM2B3_mobile. ]                                                     |       |            |
|                                                                                                                                                             | [Slider is used to give answers. Departure position of the marker is set to value 25.]                                                                                                |       |            |

**# r7ocreasm2b3: To what extent could the Supreme Court be dissolved, if it makes several decisions most people disagree with?**

**Notes** Og i hvilken grad mener du at dersom Norges Høyesterett begynner å ta mange avgjørelser som folk flest er uenige i, ka

| Value | Label      | Cases | Percentage |
|-------|------------|-------|------------|
| 0     | Not at all | 59    | 1.3%       |
| 1     | 1          | 9     | 0.2%       |
| 2     | 2          | 11    | 0.2%       |
| 3     | 3          | 8     | 0.2%       |
| 4     | 4          | 8     | 0.2%       |
| 5     | 5          | 7     | 0.1%       |
| 6     | 6          | 5     | 0.1%       |
| 7     | 7          | 5     | 0.1%       |
| 8     | 8          | 6     | 0.1%       |
| 9     | 9          | 9     | 0.2%       |
| 10    | 10         | 8     | 0.2%       |
| 11    | 11         | 6     | 0.1%       |
| 12    | 12         | 8     | 0.2%       |
| 13    | 13         | 4     | 0.1%       |
| 14    | 14         | 2     | 0.0%       |
| 15    | 15         | 5     | 0.1%       |
| 16    | 16         | 4     | 0.1%       |
| 17    | 17         | 4     | 0.1%       |
| 18    | 18         | 5     | 0.1%       |
| 19    | 19         | 6     | 0.1%       |
| 20    | 20         | 4     | 0.1%       |
| 21    | 21         | 8     | 0.2%       |
| 22    | 22         | 3     | 0.1%       |
| 23    | 23         | 2     | 0.0%       |
| 24    | 24         | 4     | 0.1%       |
| 25    | 25         | 52    | 1.1%       |
| 26    | 26         | 3     | 0.1%       |
| 27    | 27         | 3     | 0.1%       |
| 28    | 28         | 3     | 0.1%       |
| 29    | 29         | 1     | 0.0%       |
| 30    | 30         | 4     | 0.1%       |
| 31    | 31         | 3     | 0.1%       |
| 32    | 32         | 4     | 0.1%       |
| 33    | 33         | 3     | 0.1%       |
| 34    | 34         | 3     | 0.1%       |
| 35    | 35         | 4     | 0.1%       |
| 36    | 36         | 4     | 0.1%       |
| 37    | 37         | 1     | 0.0%       |
| 38    | 38         | 0     |            |
| 39    | 39         | 0     |            |
| 40    | 40         | 1     | 0.0%       |
| 41    | 41         | 3     | 0.1%       |
| 42    | 42         | 0     |            |



**# r7ocreasm2b3: To what extent could the Supreme Court be dissolved, if it makes several decisions most people disagree with?**

| Value | Label      | Cases | Percentage |
|-------|------------|-------|------------|
| 43    | 43         | 2     | 0.0%       |
| 44    | 44         | 0     |            |
| 45    | 45         | 0     |            |
| 46    | 46         | 0     |            |
| 47    | 47         | 2     | 0.0%       |
| 48    | 48         | 0     |            |
| 49    | 49         | 0     |            |
| 50    | Completely | 4     | 0.1%       |
| 97    | No answer  | 0     |            |
| 98    | Not asked  | 4389  | 93.6%      |

*Warning: these figures indicate the number of cases found in the data file. They cannot be interpreted as summary statistics of the population of interest.*

**# r7ocreasm2b3\_mobile: To what extent could the Supreme Court be dissolved, if it makes several decisions most people disagree with?**

|                                   |                                                                                                                                                                                                                                    |
|-----------------------------------|------------------------------------------------------------------------------------------------------------------------------------------------------------------------------------------------------------------------------------|
| <b>Information</b>                | [Type= discrete] [Format=numeric] [Range= 0-50] [Missing=*]                                                                                                                                                                        |
| <b>Statistics [NW/ W]</b>         | [Valid=4689 /-] [Invalid=0 /-]                                                                                                                                                                                                     |
| <b>Literal question</b>           | And to what extent do you think that If the Norwegian Supreme Court starts to make several decisions that most people disagree with, the institution might just as well be dissolved?                                              |
| <b>Interviewer's instructions</b> | [Asked if u=2, ran20=2 and R7OCRECSM_mobil=1. Version for mobile users due to layout. Desktop/tablet users are asked R7OCRECSM2B3. ]<br><br>[Slider is used to give answers. Departure position of the marker is set to value 25.] |
| <b>Notes</b>                      | Og i hvilken grad mener du at dersom Norges Høyesterett begynner å ta mange avgjørelser som folk flest er uenige i, ka                                                                                                             |

| Value | Label      | Cases | Percentage |
|-------|------------|-------|------------|
| 0     | Not at all | 25    | 0.5%       |
| 1     | 1          | 0     |            |
| 2     | 2          | 4     | 0.1%       |
| 3     | 3          | 3     | 0.1%       |
| 4     | 4          | 1     | 0.0%       |
| 5     | 5          | 1     | 0.0%       |
| 6     | 6          | 5     | 0.1%       |
| 7     | 7          | 1     | 0.0%       |
| 8     | 8          | 2     | 0.0%       |
| 9     | 9          | 2     | 0.0%       |
| 10    | 10         | 5     | 0.1%       |
| 11    | 11         | 2     | 0.0%       |
| 12    | 12         | 1     | 0.0%       |
| 13    | 13         | 1     | 0.0%       |
| 14    | 14         | 2     | 0.0%       |
| 15    | 15         | 1     | 0.0%       |
| 16    | 16         | 2     | 0.0%       |
| 17    | 17         | 2     | 0.0%       |
| 18    | 18         | 0     |            |
| 19    | 19         | 1     | 0.0%       |
| 20    | 20         | 1     | 0.0%       |

**# r7ocreasm2b3\_mobile: To what extent could the Supreme Court be dissolved, if it makes several decisions most people disagree with?**

| Value | Label      | Cases | Percentage |
|-------|------------|-------|------------|
| 21    | 21         | 3     | 0.1%       |
| 22    | 22         | 0     |            |
| 23    | 23         | 0     |            |
| 24    | 24         | 2     | 0.0%       |
| 25    | 25         | 25    | 0.5%       |
| 26    | 26         | 0     |            |
| 27    | 27         | 0     |            |
| 28    | 28         | 1     | 0.0%       |
| 29    | 29         | 0     |            |
| 30    | 30         | 1     | 0.0%       |
| 31    | 31         | 1     | 0.0%       |
| 32    | 32         | 1     | 0.0%       |
| 33    | 33         | 2     | 0.0%       |
| 34    | 34         | 2     | 0.0%       |
| 35    | 35         | 0     |            |
| 36    | 36         | 3     | 0.1%       |
| 37    | 37         | 0     |            |
| 38    | 38         | 0     |            |
| 39    | 39         | 1     | 0.0%       |
| 40    | 40         | 0     |            |
| 41    | 41         | 0     |            |
| 42    | 42         | 0     |            |
| 43    | 43         | 0     |            |
| 44    | 44         | 0     |            |
| 45    | 45         | 1     | 0.0%       |
| 46    | 46         | 1     | 0.0%       |
| 47    | 47         | 0     |            |
| 48    | 48         | 0     |            |
| 49    | 49         | 0     |            |
| 50    | Completely | 4     | 0.1%       |
| 97    | No answer  | 0     |            |
| 98    | Not asked  | 4579  | 97.7%      |

*Warning: these figures indicate the number of cases found in the data file. They cannot be interpreted as summary statistics of the population of interest.*

**# r7ocreasm2c1: To what extent should the Supreme Court's power in controversial issues be reduced?**

|                                   |                                                                                                                                                                                                                                |
|-----------------------------------|--------------------------------------------------------------------------------------------------------------------------------------------------------------------------------------------------------------------------------|
| <b>Information</b>                | [Type= discrete] [Format=numeric] [Range= 0-50] [Missing=*]                                                                                                                                                                    |
| <b>Statistics [NW/ W]</b>         | [Valid=4689 /-] [Invalid=0 /-]                                                                                                                                                                                                 |
| <b>Literal question</b>           | In general, to what extent do you think the Norwegian Supreme Court's power to decide certain types of controversial issues should be reduced?                                                                                 |
| <b>Interviewer's instructions</b> | [Asked if u=2, ran20=3 and R7OCRECSM_mobil=0. Version for desktop and tablet users. Mobile users are asked R7OCRECSM2C1_mobile. ]<br><br>[Slider is used to give answers. Departure position of the marker is set to value 1.] |
| <b>Notes</b>                      | Generelt sett, i hvilken grad mener du at Norges Høyesteretts makt til å avgjøre visse typer kontroversielle saker b                                                                                                           |

# r7ocrecsm2c1: To what extent should the Supreme Court's power in controversial issues be reduced?

| Value | Label      | Cases | Percentage |
|-------|------------|-------|------------|
| 0     | Not at all | 8     | 0.2%       |
| 1     | 1          | 133   | 2.8%       |
| 2     | 2          | 6     | 0.1%       |
| 3     | 3          | 1     | 0.0%       |
| 4     | 4          | 9     | 0.2%       |
| 5     | 5          | 7     | 0.1%       |
| 6     | 6          | 3     | 0.1%       |
| 7     | 7          | 5     | 0.1%       |
| 8     | 8          | 3     | 0.1%       |
| 9     | 9          | 6     | 0.1%       |
| 10    | 10         | 5     | 0.1%       |
| 11    | 11         | 5     | 0.1%       |
| 12    | 12         | 3     | 0.1%       |
| 13    | 13         | 4     | 0.1%       |
| 14    | 14         | 5     | 0.1%       |
| 15    | 15         | 2     | 0.0%       |
| 16    | 16         | 3     | 0.1%       |
| 17    | 17         | 0     |            |
| 18    | 18         | 1     | 0.0%       |
| 19    | 19         | 0     |            |
| 20    | 20         | 2     | 0.0%       |
| 21    | 21         | 1     | 0.0%       |
| 22    | 22         | 2     | 0.0%       |
| 23    | 23         | 1     | 0.0%       |
| 24    | 24         | 25    | 0.5%       |
| 25    | 25         | 33    | 0.7%       |
| 26    | 26         | 8     | 0.2%       |
| 27    | 27         | 1     | 0.0%       |
| 28    | 28         | 1     | 0.0%       |
| 29    | 29         | 4     | 0.1%       |
| 30    | 30         | 1     | 0.0%       |
| 31    | 31         | 2     | 0.0%       |
| 32    | 32         | 0     |            |
| 33    | 33         | 1     | 0.0%       |
| 34    | 34         | 1     | 0.0%       |
| 35    | 35         | 0     |            |
| 36    | 36         | 2     | 0.0%       |
| 37    | 37         | 2     | 0.0%       |
| 38    | 38         | 2     | 0.0%       |
| 39    | 39         | 0     |            |
| 40    | 40         | 1     | 0.0%       |
| 41    | 41         | 0     |            |
| 42    | 42         | 1     | 0.0%       |
| 43    | 43         | 0     |            |
| 44    | 44         | 1     | 0.0%       |

| # r7ocreasm2c1: To what extent should the Supreme Court's power in controversial issues be reduced?                                                         |                                                                                                                                                                                                                                   |       |            |
|-------------------------------------------------------------------------------------------------------------------------------------------------------------|-----------------------------------------------------------------------------------------------------------------------------------------------------------------------------------------------------------------------------------|-------|------------|
| Value                                                                                                                                                       | Label                                                                                                                                                                                                                             | Cases | Percentage |
| 45                                                                                                                                                          | 45                                                                                                                                                                                                                                | 0     |            |
| 46                                                                                                                                                          | 46                                                                                                                                                                                                                                | 0     |            |
| 47                                                                                                                                                          | 47                                                                                                                                                                                                                                | 2     | 0.0%       |
| 48                                                                                                                                                          | 48                                                                                                                                                                                                                                | 0     |            |
| 49                                                                                                                                                          | 49                                                                                                                                                                                                                                | 2     | 0.0%       |
| 50                                                                                                                                                          | Completely                                                                                                                                                                                                                        | 0     |            |
| 97                                                                                                                                                          | No answer                                                                                                                                                                                                                         | 0     |            |
| 98                                                                                                                                                          | Not asked                                                                                                                                                                                                                         | 4384  | 93.5%      |
| Warning: these figures indicate the number of cases found in the data file. They cannot be interpreted as summary statistics of the population of interest. |                                                                                                                                                                                                                                   |       |            |
| # r7ocreasm2c1_mobile: To what extent should the Supreme Court's power in controversial issues be reduced?                                                  |                                                                                                                                                                                                                                   |       |            |
| Information                                                                                                                                                 | [Type= discrete] [Format=numeric] [Range= 0-50] [Missing=*]                                                                                                                                                                       |       |            |
| Statistics [NW/ W]                                                                                                                                          | [Valid=4689 /-] [Invalid=0 /-]                                                                                                                                                                                                    |       |            |
| Literal question                                                                                                                                            | In general, to what extent do you think the Norwegian Supreme Court's power to decide certain types of controversial issues should be reduced?                                                                                    |       |            |
| Interviewer's instructions                                                                                                                                  | [Asked if u=2, ran20=3 and R7OCRECSM_mobil=1. Version for mobile users due to layout. Desktop/tablet users are asked R7OCRECSM2C1. ]<br><br>[Slider is used to give answers. Departure position of the marker is set to value 1.] |       |            |
| Notes                                                                                                                                                       | Generelt sett, i hvilken grad mener du at Norges Høyesteretts makt til å avgjøre visse typer kontroversielle saker b                                                                                                              |       |            |
| Value                                                                                                                                                       | Label                                                                                                                                                                                                                             | Cases | Percentage |
| 0                                                                                                                                                           | Not at all                                                                                                                                                                                                                        | 4     | 0.1%       |
| 1                                                                                                                                                           | 1                                                                                                                                                                                                                                 | 49    | 1.0%       |
| 2                                                                                                                                                           | 2                                                                                                                                                                                                                                 | 1     | 0.0%       |
| 3                                                                                                                                                           | 3                                                                                                                                                                                                                                 | 0     |            |
| 4                                                                                                                                                           | 4                                                                                                                                                                                                                                 | 0     |            |
| 5                                                                                                                                                           | 5                                                                                                                                                                                                                                 | 0     |            |
| 6                                                                                                                                                           | 6                                                                                                                                                                                                                                 | 0     |            |
| 7                                                                                                                                                           | 7                                                                                                                                                                                                                                 | 3     | 0.1%       |
| 8                                                                                                                                                           | 8                                                                                                                                                                                                                                 | 0     |            |
| 9                                                                                                                                                           | 9                                                                                                                                                                                                                                 | 0     |            |
| 10                                                                                                                                                          | 10                                                                                                                                                                                                                                | 1     | 0.0%       |
| 11                                                                                                                                                          | 11                                                                                                                                                                                                                                | 0     |            |
| 12                                                                                                                                                          | 12                                                                                                                                                                                                                                | 1     | 0.0%       |
| 13                                                                                                                                                          | 13                                                                                                                                                                                                                                | 2     | 0.0%       |
| 14                                                                                                                                                          | 14                                                                                                                                                                                                                                | 1     | 0.0%       |
| 15                                                                                                                                                          | 15                                                                                                                                                                                                                                | 2     | 0.0%       |
| 16                                                                                                                                                          | 16                                                                                                                                                                                                                                | 0     |            |
| 17                                                                                                                                                          | 17                                                                                                                                                                                                                                | 0     |            |
| 18                                                                                                                                                          | 18                                                                                                                                                                                                                                | 2     | 0.0%       |
| 19                                                                                                                                                          | 19                                                                                                                                                                                                                                | 0     |            |
| 20                                                                                                                                                          | 20                                                                                                                                                                                                                                | 1     | 0.0%       |
| 21                                                                                                                                                          | 21                                                                                                                                                                                                                                | 3     | 0.1%       |
| 22                                                                                                                                                          | 22                                                                                                                                                                                                                                | 0     |            |
| 23                                                                                                                                                          | 23                                                                                                                                                                                                                                | 3     | 0.1%       |
| 24                                                                                                                                                          | 24                                                                                                                                                                                                                                | 1     | 0.0%       |

| # r7ocreasm2c1_mobile: To what extent should the Supreme Court's power in controversial issues be reduced?                                                  |                                                                                                                                                                                                                                |       |            |
|-------------------------------------------------------------------------------------------------------------------------------------------------------------|--------------------------------------------------------------------------------------------------------------------------------------------------------------------------------------------------------------------------------|-------|------------|
| Value                                                                                                                                                       | Label                                                                                                                                                                                                                          | Cases | Percentage |
| 25                                                                                                                                                          | 25                                                                                                                                                                                                                             | 0     |            |
| 26                                                                                                                                                          | 26                                                                                                                                                                                                                             | 2     | 0.0%       |
| 27                                                                                                                                                          | 27                                                                                                                                                                                                                             | 4     | 0.1%       |
| 28                                                                                                                                                          | 28                                                                                                                                                                                                                             | 3     | 0.1%       |
| 29                                                                                                                                                          | 29                                                                                                                                                                                                                             | 9     | 0.2%       |
| 30                                                                                                                                                          | 30                                                                                                                                                                                                                             | 4     | 0.1%       |
| 31                                                                                                                                                          | 31                                                                                                                                                                                                                             | 2     | 0.0%       |
| 32                                                                                                                                                          | 32                                                                                                                                                                                                                             | 2     | 0.0%       |
| 33                                                                                                                                                          | 33                                                                                                                                                                                                                             | 2     | 0.0%       |
| 34                                                                                                                                                          | 34                                                                                                                                                                                                                             | 1     | 0.0%       |
| 35                                                                                                                                                          | 35                                                                                                                                                                                                                             | 1     | 0.0%       |
| 36                                                                                                                                                          | 36                                                                                                                                                                                                                             | 0     |            |
| 37                                                                                                                                                          | 37                                                                                                                                                                                                                             | 0     |            |
| 38                                                                                                                                                          | 38                                                                                                                                                                                                                             | 0     |            |
| 39                                                                                                                                                          | 39                                                                                                                                                                                                                             | 0     |            |
| 40                                                                                                                                                          | 40                                                                                                                                                                                                                             | 0     |            |
| 41                                                                                                                                                          | 41                                                                                                                                                                                                                             | 0     |            |
| 42                                                                                                                                                          | 42                                                                                                                                                                                                                             | 0     |            |
| 43                                                                                                                                                          | 43                                                                                                                                                                                                                             | 1     | 0.0%       |
| 44                                                                                                                                                          | 44                                                                                                                                                                                                                             | 0     |            |
| 45                                                                                                                                                          | 45                                                                                                                                                                                                                             | 2     | 0.0%       |
| 46                                                                                                                                                          | 46                                                                                                                                                                                                                             | 1     | 0.0%       |
| 47                                                                                                                                                          | 47                                                                                                                                                                                                                             | 0     |            |
| 48                                                                                                                                                          | 48                                                                                                                                                                                                                             | 0     |            |
| 49                                                                                                                                                          | 49                                                                                                                                                                                                                             | 0     |            |
| 50                                                                                                                                                          | Completely                                                                                                                                                                                                                     | 4     | 0.1%       |
| 97                                                                                                                                                          | No answer                                                                                                                                                                                                                      | 0     |            |
| 98                                                                                                                                                          | Not asked                                                                                                                                                                                                                      | 4577  | 97.6%      |
| Warning: these figures indicate the number of cases found in the data file. They cannot be interpreted as summary statistics of the population of interest. |                                                                                                                                                                                                                                |       |            |
| # r7ocreasm2c2: To what extent does the Supreme Court favor certain groups?                                                                                 |                                                                                                                                                                                                                                |       |            |
| Information                                                                                                                                                 | [Type= discrete] [Format=numeric] [Range= 0-50] [Missing=*]                                                                                                                                                                    |       |            |
| Statistics [NW/ W]                                                                                                                                          | [Valid=4689 /-] [Invalid=0 /-]                                                                                                                                                                                                 |       |            |
| Literal question                                                                                                                                            | To what extent do you think the decisions of the Norwegian Supreme Court favor certain groups more than others?                                                                                                                |       |            |
| Interviewer's instructions                                                                                                                                  | [Asked if u=2, ran20=3 and R7OCRECSM_mobil=0. Version for desktop and tablet users. Mobile users are asked R7OCRECSM2C2_mobile. ]<br><br>[Slider is used to give answers. Departure position of the marker is set to value 1.] |       |            |
| Notes                                                                                                                                                       | I hvilken grad mener du at avgjørelsene til Norges Høyesterett favoriserer enkelte grupper mer enn andre? ^f('R7OCREC                                                                                                          |       |            |
| Value                                                                                                                                                       | Label                                                                                                                                                                                                                          | Cases | Percentage |
| 0                                                                                                                                                           | Not at all                                                                                                                                                                                                                     | 6     | 0.1%       |
| 1                                                                                                                                                           | 1                                                                                                                                                                                                                              | 113   | 2.4%       |
| 2                                                                                                                                                           | 2                                                                                                                                                                                                                              | 3     | 0.1%       |
| 3                                                                                                                                                           | 3                                                                                                                                                                                                                              | 4     | 0.1%       |
| 4                                                                                                                                                           | 4                                                                                                                                                                                                                              | 5     | 0.1%       |
| 5                                                                                                                                                           | 5                                                                                                                                                                                                                              | 9     | 0.2%       |

# r7ocrecsm2c2: To what extent does the Supreme Court favor certain groups?

| Value | Label      | Cases | Percentage |
|-------|------------|-------|------------|
| 6     | 6          | 4     | 0.1%       |
| 7     | 7          | 4     | 0.1%       |
| 8     | 8          | 2     | 0.0%       |
| 9     | 9          | 10    | 0.2%       |
| 10    | 10         | 5     | 0.1%       |
| 11    | 11         | 5     | 0.1%       |
| 12    | 12         | 8     | 0.2%       |
| 13    | 13         | 4     | 0.1%       |
| 14    | 14         | 2     | 0.0%       |
| 15    | 15         | 2     | 0.0%       |
| 16    | 16         | 1     | 0.0%       |
| 17    | 17         | 2     | 0.0%       |
| 18    | 18         | 4     | 0.1%       |
| 19    | 19         | 4     | 0.1%       |
| 20    | 20         | 0     |            |
| 21    | 21         | 2     | 0.0%       |
| 22    | 22         | 0     |            |
| 23    | 23         | 3     | 0.1%       |
| 24    | 24         | 24    | 0.5%       |
| 25    | 25         | 35    | 0.7%       |
| 26    | 26         | 1     | 0.0%       |
| 27    | 27         | 5     | 0.1%       |
| 28    | 28         | 1     | 0.0%       |
| 29    | 29         | 3     | 0.1%       |
| 30    | 30         | 5     | 0.1%       |
| 31    | 31         | 2     | 0.0%       |
| 32    | 32         | 2     | 0.0%       |
| 33    | 33         | 2     | 0.0%       |
| 34    | 34         | 3     | 0.1%       |
| 35    | 35         | 6     | 0.1%       |
| 36    | 36         | 1     | 0.0%       |
| 37    | 37         | 2     | 0.0%       |
| 38    | 38         | 2     | 0.0%       |
| 39    | 39         | 1     | 0.0%       |
| 40    | 40         | 0     |            |
| 41    | 41         | 2     | 0.0%       |
| 42    | 42         | 0     |            |
| 43    | 43         | 1     | 0.0%       |
| 44    | 44         | 0     |            |
| 45    | 45         | 0     |            |
| 46    | 46         | 1     | 0.0%       |
| 47    | 47         | 1     | 0.0%       |
| 48    | 48         | 1     | 0.0%       |
| 49    | 49         | 0     |            |
| 50    | Completely | 2     | 0.0%       |

| # r7ocreasm2c2: To what extent does the Supreme Court favor certain groups?                                                                                 |                                                                                                                                                                                                                                   |       |            |
|-------------------------------------------------------------------------------------------------------------------------------------------------------------|-----------------------------------------------------------------------------------------------------------------------------------------------------------------------------------------------------------------------------------|-------|------------|
| Value                                                                                                                                                       | Label                                                                                                                                                                                                                             | Cases | Percentage |
| 97                                                                                                                                                          | No answer                                                                                                                                                                                                                         | 0     |            |
| 98                                                                                                                                                          | Not asked                                                                                                                                                                                                                         | 4384  | 93.5%      |
| Warning: these figures indicate the number of cases found in the data file. They cannot be interpreted as summary statistics of the population of interest. |                                                                                                                                                                                                                                   |       |            |
| # r7ocreasm2c2_mobile: To what extent does the Supreme Court favor certain groups?                                                                          |                                                                                                                                                                                                                                   |       |            |
| Information                                                                                                                                                 | [Type= discrete] [Format=numeric] [Range= 0-50] [Missing=*]                                                                                                                                                                       |       |            |
| Statistics [NW/ W]                                                                                                                                          | [Valid=4689 /-] [Invalid=0 /-]                                                                                                                                                                                                    |       |            |
| Literal question                                                                                                                                            | To what extent do you think the decisions of the Norwegian Supreme Court favor certain groups more than others?                                                                                                                   |       |            |
| Interviewer's instructions                                                                                                                                  | [Asked if u=2, ran20=3 and R7OCRECSM_mobil=1. Version for mobile users due to layout. Desktop/tablet users are asked R7OCRECSM2C2. ]<br><br>[Slider is used to give answers. Departure position of the marker is set to value 1.] |       |            |
| Notes                                                                                                                                                       | I hvilken grad mener du at avgjørelsene til Norges Høyesterett favoriserer enkelte grupper mer enn andre?                                                                                                                         |       |            |
| Value                                                                                                                                                       | Label                                                                                                                                                                                                                             | Cases | Percentage |
| 0                                                                                                                                                           | Not at all                                                                                                                                                                                                                        | 3     | 0.1%       |
| 1                                                                                                                                                           | 1                                                                                                                                                                                                                                 | 45    | 1.0%       |
| 2                                                                                                                                                           | 2                                                                                                                                                                                                                                 | 1     | 0.0%       |
| 3                                                                                                                                                           | 3                                                                                                                                                                                                                                 | 0     |            |
| 4                                                                                                                                                           | 4                                                                                                                                                                                                                                 | 1     | 0.0%       |
| 5                                                                                                                                                           | 5                                                                                                                                                                                                                                 | 2     | 0.0%       |
| 6                                                                                                                                                           | 6                                                                                                                                                                                                                                 | 3     | 0.1%       |
| 7                                                                                                                                                           | 7                                                                                                                                                                                                                                 | 1     | 0.0%       |
| 8                                                                                                                                                           | 8                                                                                                                                                                                                                                 | 0     |            |
| 9                                                                                                                                                           | 9                                                                                                                                                                                                                                 | 0     |            |
| 10                                                                                                                                                          | 10                                                                                                                                                                                                                                | 1     | 0.0%       |
| 11                                                                                                                                                          | 11                                                                                                                                                                                                                                | 1     | 0.0%       |
| 12                                                                                                                                                          | 12                                                                                                                                                                                                                                | 0     |            |
| 13                                                                                                                                                          | 13                                                                                                                                                                                                                                | 0     |            |
| 14                                                                                                                                                          | 14                                                                                                                                                                                                                                | 0     |            |
| 15                                                                                                                                                          | 15                                                                                                                                                                                                                                | 0     |            |
| 16                                                                                                                                                          | 16                                                                                                                                                                                                                                | 2     | 0.0%       |
| 17                                                                                                                                                          | 17                                                                                                                                                                                                                                | 1     | 0.0%       |
| 18                                                                                                                                                          | 18                                                                                                                                                                                                                                | 4     | 0.1%       |
| 19                                                                                                                                                          | 19                                                                                                                                                                                                                                | 2     | 0.0%       |
| 20                                                                                                                                                          | 20                                                                                                                                                                                                                                | 2     | 0.0%       |
| 21                                                                                                                                                          | 21                                                                                                                                                                                                                                | 1     | 0.0%       |
| 22                                                                                                                                                          | 22                                                                                                                                                                                                                                | 0     |            |
| 23                                                                                                                                                          | 23                                                                                                                                                                                                                                | 0     |            |
| 24                                                                                                                                                          | 24                                                                                                                                                                                                                                | 2     | 0.0%       |
| 25                                                                                                                                                          | 25                                                                                                                                                                                                                                | 2     | 0.0%       |
| 26                                                                                                                                                          | 26                                                                                                                                                                                                                                | 0     |            |
| 27                                                                                                                                                          | 27                                                                                                                                                                                                                                | 3     | 0.1%       |
| 28                                                                                                                                                          | 28                                                                                                                                                                                                                                | 4     | 0.1%       |
| 29                                                                                                                                                          | 29                                                                                                                                                                                                                                | 2     | 0.0%       |
| 30                                                                                                                                                          | 30                                                                                                                                                                                                                                | 8     | 0.2%       |
| 31                                                                                                                                                          | 31                                                                                                                                                                                                                                | 6     | 0.1%       |

### # r7ocreasm2c2\_mobile: To what extent does the Supreme Court favor certain groups?

| Value | Label      | Cases | Percentage |
|-------|------------|-------|------------|
| 32    | 32         | 1     | 0.0%       |
| 33    | 33         | 1     | 0.0%       |
| 34    | 34         | 0     |            |
| 35    | 35         | 2     | 0.0%       |
| 36    | 36         | 2     | 0.0%       |
| 37    | 37         | 0     |            |
| 38    | 38         | 2     | 0.0%       |
| 39    | 39         | 1     | 0.0%       |
| 40    | 40         | 0     |            |
| 41    | 41         | 1     | 0.0%       |
| 42    | 42         | 0     |            |
| 43    | 43         | 1     | 0.0%       |
| 44    | 44         | 1     | 0.0%       |
| 45    | 45         | 0     |            |
| 46    | 46         | 0     |            |
| 47    | 47         | 0     |            |
| 48    | 48         | 0     |            |
| 49    | 49         | 0     |            |
| 50    | Completely | 3     | 0.1%       |
| 97    | No answer  | 0     |            |
| 98    | Not asked  | 4577  | 97.6%      |

Warning: these figures indicate the number of cases found in the data file. They cannot be interpreted as summary statistics of the population of interest.

### # r7ocreasm2c3: To what extent could the Supreme Court be dissolved, if it makes several decisions most people disagree with?

|                                   |                                                                                                                                                                                                                                |
|-----------------------------------|--------------------------------------------------------------------------------------------------------------------------------------------------------------------------------------------------------------------------------|
| <b>Information</b>                | [Type= discrete] [Format=numeric] [Range= 0-50] [Missing=*]                                                                                                                                                                    |
| <b>Statistics [NW/ W]</b>         | [Valid=4689 /-] [Invalid=0 /-]                                                                                                                                                                                                 |
| <b>Literal question</b>           | And to what extent do you think that If the Norwegian Supreme Court starts to make several decisions that most people disagree with, the institution might just as well be dissolved?                                          |
| <b>Interviewer's instructions</b> | [Asked if u=2, ran20=3 and R7OCRECSM_mobil=0. Version for desktop and tablet users. Mobile users are asked R7OCRECSM2C3_mobile. ]<br><br>[Slider is used to give answers. Departure position of the marker is set to value 1.] |
| <b>Notes</b>                      | Og i hvilken grad mener du at dersom Norges Høyesterett begynner å ta mange avgjørelser som folk flest er uenige i, ka                                                                                                         |

| Value | Label      | Cases | Percentage |
|-------|------------|-------|------------|
| 0     | Not at all | 10    | 0.2%       |
| 1     | 1          | 156   | 3.3%       |
| 2     | 2          | 9     | 0.2%       |
| 3     | 3          | 2     | 0.0%       |
| 4     | 4          | 4     | 0.1%       |
| 5     | 5          | 4     | 0.1%       |
| 6     | 6          | 7     | 0.1%       |
| 7     | 7          | 5     | 0.1%       |
| 8     | 8          | 3     | 0.1%       |
| 9     | 9          | 2     | 0.0%       |
| 10    | 10         | 3     | 0.1%       |



**# r7ocresm2c3: To what extent could the Supreme Court be dissolved, if it makes several decisions most people disagree with?**

| Value | Label      | Cases | Percentage |
|-------|------------|-------|------------|
| 11    | 11         | 6     | 0.1%       |
| 12    | 12         | 3     | 0.1%       |
| 13    | 13         | 3     | 0.1%       |
| 14    | 14         | 2     | 0.0%       |
| 15    | 15         | 4     | 0.1%       |
| 16    | 16         | 0     |            |
| 17    | 17         | 1     | 0.0%       |
| 18    | 18         | 2     | 0.0%       |
| 19    | 19         | 2     | 0.0%       |
| 20    | 20         | 0     |            |
| 21    | 21         | 1     | 0.0%       |
| 22    | 22         | 0     |            |
| 23    | 23         | 3     | 0.1%       |
| 24    | 24         | 6     | 0.1%       |
| 25    | 25         | 26    | 0.6%       |
| 26    | 26         | 4     | 0.1%       |
| 27    | 27         | 5     | 0.1%       |
| 28    | 28         | 3     | 0.1%       |
| 29    | 29         | 4     | 0.1%       |
| 30    | 30         | 1     | 0.0%       |
| 31    | 31         | 2     | 0.0%       |
| 32    | 32         | 2     | 0.0%       |
| 33    | 33         | 1     | 0.0%       |
| 34    | 34         | 2     | 0.0%       |
| 35    | 35         | 2     | 0.0%       |
| 36    | 36         | 1     | 0.0%       |
| 37    | 37         | 1     | 0.0%       |
| 38    | 38         | 2     | 0.0%       |
| 39    | 39         | 1     | 0.0%       |
| 40    | 40         | 2     | 0.0%       |
| 41    | 41         | 0     |            |
| 42    | 42         | 1     | 0.0%       |
| 43    | 43         | 0     |            |
| 44    | 44         | 2     | 0.0%       |
| 45    | 45         | 1     | 0.0%       |
| 46    | 46         | 1     | 0.0%       |
| 47    | 47         | 1     | 0.0%       |
| 48    | 48         | 0     |            |
| 49    | 49         | 1     | 0.0%       |
| 50    | Completely | 1     | 0.0%       |
| 97    | No answer  | 0     |            |
| 98    | Not asked  | 4384  | 93.5%      |

*Warning: these figures indicate the number of cases found in the data file. They cannot be interpreted as summary statistics of the population of interest.*

**# r7ocreasm2c3\_mobile: To what extent could the Supreme Court be dissolved, if it makes several decisions most people disagree with?**

|                                   |                                                                                                                                                                                                                                   |
|-----------------------------------|-----------------------------------------------------------------------------------------------------------------------------------------------------------------------------------------------------------------------------------|
| <b>Information</b>                | [Type= discrete] [Format=numeric] [Range= 0-50] [Missing=*]                                                                                                                                                                       |
| <b>Statistics [NW/ W]</b>         | [Valid=4689 /-] [Invalid=0 /-]                                                                                                                                                                                                    |
| <b>Literal question</b>           | And to what extent do you think that If the Norwegian Supreme Court starts to make several decisions that most people disagree with, the institution might just as well be dissolved?                                             |
| <b>Interviewer's instructions</b> | [Asked if u=2, ran20=3 and R7OCRECSM_mobil=1. Version for mobile users due to layout. Desktop/tablet users are asked R7OCRECSM2C3. ]<br><br>[Slider is used to give answers. Departure position of the marker is set to value 1.] |
| <b>Notes</b>                      | Og i hvilken grad mener du at dersom Norges Høyesterett begynner å ta mange avgjørelser som folk flest er uenige i, ka                                                                                                            |

| Value | Label      | Cases | Percentage |
|-------|------------|-------|------------|
| 0     | Not at all | 7     | 0.1%       |
| 1     | 1          | 51    | 1.1%       |
| 2     | 2          | 1     | 0.0%       |
| 3     | 3          | 1     | 0.0%       |
| 4     | 4          | 1     | 0.0%       |
| 5     | 5          | 0     |            |
| 6     | 6          | 0     |            |
| 7     | 7          | 1     | 0.0%       |
| 8     | 8          | 5     | 0.1%       |
| 9     | 9          | 0     |            |
| 10    | 10         | 0     |            |
| 11    | 11         | 2     | 0.0%       |
| 12    | 12         | 3     | 0.1%       |
| 13    | 13         | 1     | 0.0%       |
| 14    | 14         | 0     |            |
| 15    | 15         | 2     | 0.0%       |
| 16    | 16         | 0     |            |
| 17    | 17         | 2     | 0.0%       |
| 18    | 18         | 3     | 0.1%       |
| 19    | 19         | 1     | 0.0%       |
| 20    | 20         | 1     | 0.0%       |
| 21    | 21         | 0     |            |
| 22    | 22         | 2     | 0.0%       |
| 23    | 23         | 0     |            |
| 24    | 24         | 0     |            |
| 25    | 25         | 2     | 0.0%       |
| 26    | 26         | 2     | 0.0%       |
| 27    | 27         | 1     | 0.0%       |
| 28    | 28         | 1     | 0.0%       |
| 29    | 29         | 1     | 0.0%       |
| 30    | 30         | 1     | 0.0%       |
| 31    | 31         | 5     | 0.1%       |
| 32    | 32         | 3     | 0.1%       |
| 33    | 33         | 1     | 0.0%       |
| 34    | 34         | 1     | 0.0%       |
| 35    | 35         | 0     |            |

**# r7ocrecsm2c3\_mobile: To what extent could the Supreme Court be dissolved, if it makes several decisions most people disagree with?**

| Value | Label      | Cases | Percentage |
|-------|------------|-------|------------|
| 36    | 36         | 0     |            |
| 37    | 37         | 0     |            |
| 38    | 38         | 0     |            |
| 39    | 39         | 0     |            |
| 40    | 40         | 0     |            |
| 41    | 41         | 0     |            |
| 42    | 42         | 1     | 0.0%       |
| 43    | 43         | 2     | 0.0%       |
| 44    | 44         | 0     |            |
| 45    | 45         | 0     |            |
| 46    | 46         | 1     | 0.0%       |
| 47    | 47         | 1     | 0.0%       |
| 48    | 48         | 0     |            |
| 49    | 49         | 2     | 0.0%       |
| 50    | Completely | 3     | 0.1%       |
| 97    | No answer  | 0     |            |
| 98    | Not asked  | 4577  | 97.6%      |

*Warning: these figures indicate the number of cases found in the data file. They cannot be interpreted as summary statistics of the population of interest.*

**# r7mi1: Personal thoughts when your hear the word "Muslim" [anonymized]**

|                                   |                                                                                                                                  |
|-----------------------------------|----------------------------------------------------------------------------------------------------------------------------------|
| <b>Information</b>                | [Type= discrete] [Format=character] [Missing=*]                                                                                  |
| <b>Statistics [NW/ W]</b>         | [Valid=4689 /-] [Invalid=0 /-]                                                                                                   |
| <b>Literal question</b>           | What are your personal thoughts when you hear the word “Muslim”?                                                                 |
| <b>Post-question</b>              | Please write, using your own words, the first thing that comes into your mind. We are interested in both long and short answers. |
| <b>Interviewer's instructions</b> | [Asked if u=4. ]<br>[Data withheld for the sake of anonymity]                                                                    |

| Value | Label | Cases | Percentage |
|-------|-------|-------|------------|
|       |       | 4689  | 100.0%     |

*Warning: these figures indicate the number of cases found in the data file. They cannot be interpreted as summary statistics of the population of interest.*

**# r7ran1: [Randomizes if u!=2. ]**

|                                   |                                                            |
|-----------------------------------|------------------------------------------------------------|
| <b>Information</b>                | [Type= discrete] [Format=numeric] [Range= 1-3] [Missing=*] |
| <b>Statistics [NW/ W]</b>         | [Valid=3490 /-] [Invalid=1199 /-]                          |
| <b>Interviewer's instructions</b> | [Randomizes if u!=2. ]                                     |

| Value   | Label | Cases | Percentage |
|---------|-------|-------|------------|
| 1       | 1     | 1183  | 33.9%      |
| 2       | 2     | 1163  | 33.3%      |
| 3       | 3     | 1144  | 32.8%      |
| Sysmiss |       | 1199  |            |

*Warning: these figures indicate the number of cases found in the data file. They cannot be interpreted as summary statistics of the population of interest.*

**# r7km1a: Thoughts when you hear/read the words "oil and gas" [anonymized]**

|                           |                                                 |
|---------------------------|-------------------------------------------------|
| <b>Information</b>        | [Type= discrete] [Format=character] [Missing=*] |
| <b>Statistics [NW/ W]</b> | [Valid=4689 /-] [Invalid=0 /-]                  |

| # r7km1a: Thoughts when you hear/read the words "oil and gas" [anonymized]                                                                                         |                            |                                                                                                                       |            |
|--------------------------------------------------------------------------------------------------------------------------------------------------------------------|----------------------------|-----------------------------------------------------------------------------------------------------------------------|------------|
| <b>Literal question</b>                                                                                                                                            |                            | What do you think when you hear or read the words “oil and gas”?                                                      |            |
| <b>Post-question</b>                                                                                                                                               |                            | Please write the first thing that comes into your mind. We want all types of answers.                                 |            |
| <b>Interviewer's instructions</b>                                                                                                                                  |                            | [Asked if u!=2 and ran1=1. ]                                                                                          |            |
|                                                                                                                                                                    |                            | [Data withheld for the sake of anonymity]                                                                             |            |
| Value                                                                                                                                                              | Label                      | Cases                                                                                                                 | Percentage |
|                                                                                                                                                                    |                            | 4689                                                                                                                  | 100.0%     |
| <i>Warning: these figures indicate the number of cases found in the data file. They cannot be interpreted as summary statistics of the population of interest.</i> |                            |                                                                                                                       |            |
| # r7km1b: Thoughts when you hear/read the word "energy" [anonymized]                                                                                               |                            |                                                                                                                       |            |
| <b>Information</b>                                                                                                                                                 |                            | [Type= discrete] [Format=character] [Missing=*]                                                                       |            |
| <b>Statistics [NW/ W]</b>                                                                                                                                          |                            | [Valid=4689 /-] [Invalid=0 /-]                                                                                        |            |
| <b>Literal question</b>                                                                                                                                            |                            | What do you think when you hear or read the word “energy”?                                                            |            |
| <b>Post-question</b>                                                                                                                                               |                            | Please write the first thing that comes into your mind. We want all types of answers.                                 |            |
| <b>Interviewer's instructions</b>                                                                                                                                  |                            | [Asked if u!=2 and ran1=2. ]                                                                                          |            |
|                                                                                                                                                                    |                            | [Data withheld for the sake of anonymity]                                                                             |            |
| Value                                                                                                                                                              | Label                      | Cases                                                                                                                 | Percentage |
|                                                                                                                                                                    |                            | 4689                                                                                                                  | 100.0%     |
| <i>Warning: these figures indicate the number of cases found in the data file. They cannot be interpreted as summary statistics of the population of interest.</i> |                            |                                                                                                                       |            |
| # r7km1c: Thoughts when you hear/read the word "reorganisation" [anonymized]                                                                                       |                            |                                                                                                                       |            |
| <b>Information</b>                                                                                                                                                 |                            | [Type= discrete] [Format=character] [Missing=*]                                                                       |            |
| <b>Statistics [NW/ W]</b>                                                                                                                                          |                            | [Valid=4689 /-] [Invalid=0 /-]                                                                                        |            |
| <b>Literal question</b>                                                                                                                                            |                            | What do you think when you hear or read the word “reorganisation”?                                                    |            |
| <b>Post-question</b>                                                                                                                                               |                            | Please write the first thing that comes into your mind. We want all types of answers.                                 |            |
| <b>Interviewer's instructions</b>                                                                                                                                  |                            | [Asked if u!=2 and ran1=3. ]                                                                                          |            |
|                                                                                                                                                                    |                            | [Data withheld for the sake of anonymity]                                                                             |            |
| Value                                                                                                                                                              | Label                      | Cases                                                                                                                 | Percentage |
|                                                                                                                                                                    |                            | 4689                                                                                                                  | 100.0%     |
| <i>Warning: these figures indicate the number of cases found in the data file. They cannot be interpreted as summary statistics of the population of interest.</i> |                            |                                                                                                                       |            |
| # r7dv30_1: Statement: The tax burden should be reduced                                                                                                            |                            |                                                                                                                       |            |
| <b>Information</b>                                                                                                                                                 |                            | [Type= discrete] [Format=numeric] [Range= 1-7] [Missing=*]                                                            |            |
| <b>Statistics [NW/ W]</b>                                                                                                                                          |                            | [Valid=4689 /-] [Invalid=0 /-]                                                                                        |            |
| <b>Pre-question</b>                                                                                                                                                |                            | How much do you agree or disagree with the following statements:                                                      |            |
| <b>Literal question</b>                                                                                                                                            |                            | The tax burden should be reduced, even if it leads to cutbacks in the welfare state.                                  |            |
| <b>Interviewer's instructions</b>                                                                                                                                  |                            | [All respondents asked. ]                                                                                             |            |
| <b>Notes</b>                                                                                                                                                       |                            | Skattetrykket bør senkes, selv om det fører til nedskjæringer i velferdsstaten. (Hvor enig eller uenig er du i følgen |            |
| Value                                                                                                                                                              | Label                      | Cases                                                                                                                 | Percentage |
| 1                                                                                                                                                                  | Strongly agree             | 112                                                                                                                   | 2.4%       |
| 2                                                                                                                                                                  | Agree                      | 296                                                                                                                   | 6.3%       |
| 3                                                                                                                                                                  | Somewhat agree             | 606                                                                                                                   | 12.9%      |
| 4                                                                                                                                                                  | Neither agree nor disagree | 497                                                                                                                   | 10.6%      |
| 5                                                                                                                                                                  | Somewhat disagree          | 877                                                                                                                   | 18.7%      |
| 6                                                                                                                                                                  | Disagree                   | 1266                                                                                                                  | 27.0%      |

| # r7dv30_1: Statement: The tax burden should be reduced                                                                                                     |                                                                                                         |       |                              |
|-------------------------------------------------------------------------------------------------------------------------------------------------------------|---------------------------------------------------------------------------------------------------------|-------|------------------------------|
| Value                                                                                                                                                       | Label                                                                                                   | Cases | Percentage                   |
| 7                                                                                                                                                           | Strongly disagree                                                                                       | 1007  | <div><div></div></div> 21.5% |
| 97                                                                                                                                                          | No answer                                                                                               | 28    | <div><div></div></div> 0.6%  |
| Warning: these figures indicate the number of cases found in the data file. They cannot be interpreted as summary statistics of the population of interest. |                                                                                                         |       |                              |
| # r7dv30_2: Statement: Commercial private schools should be allowed                                                                                         |                                                                                                         |       |                              |
| Information                                                                                                                                                 | [Type= discrete] [Format=numeric] [Range= 1-7] [Missing=*]                                              |       |                              |
| Statistics [NW/ W]                                                                                                                                          | [Valid=4689 /-] [Invalid=0 /-]                                                                          |       |                              |
| Pre-question                                                                                                                                                | How much do you agree or disagree with the following statements:                                        |       |                              |
| Literal question                                                                                                                                            | Commercial private schools should be allowed.                                                           |       |                              |
| Interviewer's instructions                                                                                                                                  | [All respondents asked. ]                                                                               |       |                              |
| Notes                                                                                                                                                       | Kommersielle privatskoler bør være tillatt. (Hvor enig eller uenig er du i følgende påstander:)         |       |                              |
| Value                                                                                                                                                       | Label                                                                                                   | Cases | Percentage                   |
| 1                                                                                                                                                           | Strongly agree                                                                                          | 299   | <div><div></div></div> 6.4%  |
| 2                                                                                                                                                           | Agree                                                                                                   | 849   | <div><div></div></div> 18.1% |
| 3                                                                                                                                                           | Somewhat agree                                                                                          | 962   | <div><div></div></div> 20.5% |
| 4                                                                                                                                                           | Neither agree nor disagree                                                                              | 591   | <div><div></div></div> 12.6% |
| 5                                                                                                                                                           | Somewhat disagree                                                                                       | 696   | <div><div></div></div> 14.8% |
| 6                                                                                                                                                           | Disagree                                                                                                | 656   | <div><div></div></div> 14.0% |
| 7                                                                                                                                                           | Strongly disagree                                                                                       | 595   | <div><div></div></div> 12.7% |
| 97                                                                                                                                                          | No answer                                                                                               | 41    | <div><div></div></div> 0.9%  |
| Warning: these figures indicate the number of cases found in the data file. They cannot be interpreted as summary statistics of the population of interest. |                                                                                                         |       |                              |
| # r7dv30_3: Statement: Heterosexual and homosexual couples should have equal rights                                                                         |                                                                                                         |       |                              |
| Information                                                                                                                                                 | [Type= discrete] [Format=numeric] [Range= 1-7] [Missing=*]                                              |       |                              |
| Statistics [NW/ W]                                                                                                                                          | [Valid=4689 /-] [Invalid=0 /-]                                                                          |       |                              |
| Pre-question                                                                                                                                                | How much do you agree or disagree with the following statements:                                        |       |                              |
| Literal question                                                                                                                                            | Heterosexual and homosexual couples should have equal rights.                                           |       |                              |
| Interviewer's instructions                                                                                                                                  | [All respondents asked. ]                                                                               |       |                              |
| Notes                                                                                                                                                       | Heterofile og homofile par bør ha like rettigheter. (Hvor enig eller uenig er du i følgende påstander:) |       |                              |
| Value                                                                                                                                                       | Label                                                                                                   | Cases | Percentage                   |
| 1                                                                                                                                                           | Strongly agree                                                                                          | 2118  | <div><div></div></div> 45.2% |
| 2                                                                                                                                                           | Agree                                                                                                   | 1284  | <div><div></div></div> 27.4% |
| 3                                                                                                                                                           | Somewhat agree                                                                                          | 421   | <div><div></div></div> 9.0%  |
| 4                                                                                                                                                           | Neither agree nor disagree                                                                              | 299   | <div><div></div></div> 6.4%  |
| 5                                                                                                                                                           | Somewhat disagree                                                                                       | 213   | <div><div></div></div> 4.5%  |
| 6                                                                                                                                                           | Disagree                                                                                                | 176   | <div><div></div></div> 3.8%  |
| 7                                                                                                                                                           | Strongly disagree                                                                                       | 148   | <div><div></div></div> 3.2%  |
| 97                                                                                                                                                          | No answer                                                                                               | 30    | <div><div></div></div> 0.6%  |
| Warning: these figures indicate the number of cases found in the data file. They cannot be interpreted as summary statistics of the population of interest. |                                                                                                         |       |                              |
| # r7dv30_4: Statement: It is better for a country if there is a diversity of different religions and beliefs                                                |                                                                                                         |       |                              |
| Information                                                                                                                                                 | [Type= discrete] [Format=numeric] [Range= 1-7] [Missing=*]                                              |       |                              |
| Statistics [NW/ W]                                                                                                                                          | [Valid=4689 /-] [Invalid=0 /-]                                                                          |       |                              |
| Pre-question                                                                                                                                                | How much do you agree or disagree with the following statements:                                        |       |                              |
| Literal question                                                                                                                                            | It is better for a country if there is a diversity of different religions and beliefs.                  |       |                              |

|                                                                                                                                                             |                                                                                                                                     |       |                              |
|-------------------------------------------------------------------------------------------------------------------------------------------------------------|-------------------------------------------------------------------------------------------------------------------------------------|-------|------------------------------|
| # r7dv30_4: Statement: It is better for a country if there is a diversity of different religions and beliefs                                                |                                                                                                                                     |       |                              |
| Interviewer's instructions                                                                                                                                  | [All respondents asked. ]                                                                                                           |       |                              |
| Notes                                                                                                                                                       | Det er bedre for et land hvis det finnes et mangfold av ulike religioner og livssyn. (Hvor enig eller uenig er du i følg            |       |                              |
| Value                                                                                                                                                       | Label                                                                                                                               | Cases | Percentage                   |
| 1                                                                                                                                                           | Strongly agree                                                                                                                      | 581   | <div><div></div></div> 12.4% |
| 2                                                                                                                                                           | Agree                                                                                                                               | 1082  | <div><div></div></div> 23.1% |
| 3                                                                                                                                                           | Somewhat agree                                                                                                                      | 1001  | <div><div></div></div> 21.3% |
| 4                                                                                                                                                           | Neither agree nor disagree                                                                                                          | 666   | <div><div></div></div> 14.2% |
| 5                                                                                                                                                           | Somewhat disagree                                                                                                                   | 569   | <div><div></div></div> 12.1% |
| 6                                                                                                                                                           | Disagree                                                                                                                            | 444   | <div><div></div></div> 9.5%  |
| 7                                                                                                                                                           | Strongly disagree                                                                                                                   | 317   | <div><div></div></div> 6.8%  |
| 97                                                                                                                                                          | No answer                                                                                                                           | 29    | <div><div></div></div> 0.6%  |
| Warning: these figures indicate the number of cases found in the data file. They cannot be interpreted as summary statistics of the population of interest. |                                                                                                                                     |       |                              |
| # r7ran40: [All respondents randomized. ]                                                                                                                   |                                                                                                                                     |       |                              |
| Information                                                                                                                                                 | [Type= discrete] [Format=numeric] [Range= 1-4] [Missing=*]                                                                          |       |                              |
| Statistics [NW/ W]                                                                                                                                          | [Valid=1199 /-] [Invalid=3490 /-]                                                                                                   |       |                              |
| Interviewer's instructions                                                                                                                                  | [Randomizes if u=2. ]                                                                                                               |       |                              |
| Value                                                                                                                                                       | Label                                                                                                                               | Cases | Percentage                   |
| 1                                                                                                                                                           | 1                                                                                                                                   | 287   | <div><div></div></div> 23.9% |
| 2                                                                                                                                                           | 2                                                                                                                                   | 333   | <div><div></div></div> 27.8% |
| 3                                                                                                                                                           | 3                                                                                                                                   | 287   | <div><div></div></div> 23.9% |
| 4                                                                                                                                                           | 4                                                                                                                                   | 292   | <div><div></div></div> 24.4% |
| Sysmiss                                                                                                                                                     |                                                                                                                                     | 3490  |                              |
| Warning: these figures indicate the number of cases found in the data file. They cannot be interpreted as summary statistics of the population of interest. |                                                                                                                                     |       |                              |
| # r7dvh_1: Statement: We should not allow oil and gas extraction in the Lofoten and Vesterålen areas                                                        |                                                                                                                                     |       |                              |
| Information                                                                                                                                                 | [Type= discrete] [Format=numeric] [Range= 1-7] [Missing=*]                                                                          |       |                              |
| Statistics [NW/ W]                                                                                                                                          | [Valid=4689 /-] [Invalid=0 /-]                                                                                                      |       |                              |
| Pre-question                                                                                                                                                | How much do you agree or disagree with the following statements:                                                                    |       |                              |
| Literal question                                                                                                                                            | We should not allow oil and gas extraction in the area by Lofoten and Vesterålen.                                                   |       |                              |
| Interviewer's instructions                                                                                                                                  | [Respondents in sub-group u=2: asked if ran40!=4. U2 respondent are asked R7DVH_1 or R7PILOTKM2. All other respondents are asked. ] |       |                              |
| Notes                                                                                                                                                       | Vi bør ikke tillate olje- og gassutvinning i området ved Lofoten og Vesterålen. (Hvor enig eller uenig er du i følgen               |       |                              |
| Value                                                                                                                                                       | Label                                                                                                                               | Cases | Percentage                   |
| 1                                                                                                                                                           | Strongly agree                                                                                                                      | 1056  | <div><div></div></div> 22.5% |
| 2                                                                                                                                                           | Agree                                                                                                                               | 745   | <div><div></div></div> 15.9% |
| 3                                                                                                                                                           | Somewhat agree                                                                                                                      | 466   | <div><div></div></div> 9.9%  |
| 4                                                                                                                                                           | Neither agree nor disagree                                                                                                          | 765   | <div><div></div></div> 16.3% |
| 5                                                                                                                                                           | Somewhat disagree                                                                                                                   | 499   | <div><div></div></div> 10.6% |
| 6                                                                                                                                                           | Disagree                                                                                                                            | 517   | <div><div></div></div> 11.0% |
| 7                                                                                                                                                           | Strongly disagree                                                                                                                   | 311   | <div><div></div></div> 6.6%  |
| 97                                                                                                                                                          | No answer                                                                                                                           | 20    | <div><div></div></div> 0.4%  |
| 98                                                                                                                                                          | Not asked                                                                                                                           | 310   | <div><div></div></div> 6.6%  |
| Warning: these figures indicate the number of cases found in the data file. They cannot be interpreted as summary statistics of the population of interest. |                                                                                                                                     |       |                              |

| # r7dvh_2: Statement: Refugees should have the same rights to social assistance as Norwegians have, even if they are not Norwegian citizens                 |                                                                                                                                             |       |                              |
|-------------------------------------------------------------------------------------------------------------------------------------------------------------|---------------------------------------------------------------------------------------------------------------------------------------------|-------|------------------------------|
| Information                                                                                                                                                 | [Type= discrete] [Format=numeric] [Range= 1-7] [Missing=*]                                                                                  |       |                              |
| Statistics [NW/ W]                                                                                                                                          | [Valid=4689 /-] [Invalid=0 /-]                                                                                                              |       |                              |
| Pre-question                                                                                                                                                | How much do you agree or disagree with the following statements:                                                                            |       |                              |
| Literal question                                                                                                                                            | Refugees should have the same rights to social assistance as Norwegians have, even if they are not Norwegian citizens.                      |       |                              |
| Interviewer's instructions                                                                                                                                  | [All respondents asked. ]                                                                                                                   |       |                              |
| Notes                                                                                                                                                       | Flyktninger bør ha samme rett til sosialhjelp som nordmenn, selv om de ikke er norske statsborgere. (Hvor enig eller uen                    |       |                              |
| Value                                                                                                                                                       | Label                                                                                                                                       | Cases | Percentage                   |
| 1                                                                                                                                                           | Strongly agree                                                                                                                              | 300   | <div><div></div></div> 6.4%  |
| 2                                                                                                                                                           | Agree                                                                                                                                       | 765   | <div><div></div></div> 16.3% |
| 3                                                                                                                                                           | Somewhat agree                                                                                                                              | 822   | <div><div></div></div> 17.5% |
| 4                                                                                                                                                           | Neither agree nor disagree                                                                                                                  | 472   | <div><div></div></div> 10.1% |
| 5                                                                                                                                                           | Somewhat disagree                                                                                                                           | 950   | <div><div></div></div> 20.3% |
| 6                                                                                                                                                           | Disagree                                                                                                                                    | 810   | <div><div></div></div> 17.3% |
| 7                                                                                                                                                           | Strongly disagree                                                                                                                           | 539   | <div><div></div></div> 11.5% |
| 97                                                                                                                                                          | No answer                                                                                                                                   | 31    | <div><div></div></div> 0.7%  |
| Warning: these figures indicate the number of cases found in the data file. They cannot be interpreted as summary statistics of the population of interest. |                                                                                                                                             |       |                              |
| # r7dvh_3: Statement: Many public activities could be done better and cheaper by the private sector                                                         |                                                                                                                                             |       |                              |
| Information                                                                                                                                                 | [Type= discrete] [Format=numeric] [Range= 1-7] [Missing=*]                                                                                  |       |                              |
| Statistics [NW/ W]                                                                                                                                          | [Valid=4689 /-] [Invalid=0 /-]                                                                                                              |       |                              |
| Pre-question                                                                                                                                                | How much do you agree or disagree with the following statements:                                                                            |       |                              |
| Literal question                                                                                                                                            | Many public activities could have been carried out both with better results and at lower cost, if they were operated by the private sector. |       |                              |
| Interviewer's instructions                                                                                                                                  | [All respondents asked. ]                                                                                                                   |       |                              |
| Notes                                                                                                                                                       | Mange offentlige aktiviteter kunne blitt utført både bedre og billigere, dersom de ble overlatt til private aktører. (                      |       |                              |
| Value                                                                                                                                                       | Label                                                                                                                                       | Cases | Percentage                   |
| 1                                                                                                                                                           | Strongly agree                                                                                                                              | 282   | <div><div></div></div> 6.0%  |
| 2                                                                                                                                                           | Agree                                                                                                                                       | 715   | <div><div></div></div> 15.2% |
| 3                                                                                                                                                           | Somewhat agree                                                                                                                              | 1148  | <div><div></div></div> 24.5% |
| 4                                                                                                                                                           | Neither agree nor disagree                                                                                                                  | 608   | <div><div></div></div> 13.0% |
| 5                                                                                                                                                           | Somewhat disagree                                                                                                                           | 683   | <div><div></div></div> 14.6% |
| 6                                                                                                                                                           | Disagree                                                                                                                                    | 779   | <div><div></div></div> 16.6% |
| 7                                                                                                                                                           | Strongly disagree                                                                                                                           | 437   | <div><div></div></div> 9.3%  |
| 97                                                                                                                                                          | No answer                                                                                                                                   | 37    | <div><div></div></div> 0.8%  |
| Warning: these figures indicate the number of cases found in the data file. They cannot be interpreted as summary statistics of the population of interest. |                                                                                                                                             |       |                              |
| # r7dvh_4: Statement: The state should help reduce income disparities                                                                                       |                                                                                                                                             |       |                              |
| Information                                                                                                                                                 | [Type= discrete] [Format=numeric] [Range= 1-7] [Missing=*]                                                                                  |       |                              |
| Statistics [NW/ W]                                                                                                                                          | [Valid=4689 /-] [Invalid=0 /-]                                                                                                              |       |                              |
| Pre-question                                                                                                                                                | How much do you agree or disagree with the following statements:                                                                            |       |                              |
| Literal question                                                                                                                                            | The government should contribute to reducing income differences in society.                                                                 |       |                              |
| Interviewer's instructions                                                                                                                                  | [All respondents asked. ]                                                                                                                   |       |                              |
| Notes                                                                                                                                                       | Staten bør bidra til å redusere inntektsforskjeller i samfunnet. (Hvor enig eller uenig er du i følgende påstander:)                        |       |                              |

| # r7dvh_4: Statement: The state should help reduce income disparities                                                                                       |                                                                                                                                                                                                                                                                                                                                                                                                                                                                                         |       |                              |
|-------------------------------------------------------------------------------------------------------------------------------------------------------------|-----------------------------------------------------------------------------------------------------------------------------------------------------------------------------------------------------------------------------------------------------------------------------------------------------------------------------------------------------------------------------------------------------------------------------------------------------------------------------------------|-------|------------------------------|
| Value                                                                                                                                                       | Label                                                                                                                                                                                                                                                                                                                                                                                                                                                                                   | Cases | Percentage                   |
| 1                                                                                                                                                           | Strongly agree                                                                                                                                                                                                                                                                                                                                                                                                                                                                          | 855   | <div><div></div></div> 18.2% |
| 2                                                                                                                                                           | Agree                                                                                                                                                                                                                                                                                                                                                                                                                                                                                   | 1380  | <div><div></div></div> 29.4% |
| 3                                                                                                                                                           | Somewhat agree                                                                                                                                                                                                                                                                                                                                                                                                                                                                          | 1168  | <div><div></div></div> 24.9% |
| 4                                                                                                                                                           | Neither agree nor disagree                                                                                                                                                                                                                                                                                                                                                                                                                                                              | 493   | <div><div></div></div> 10.5% |
| 5                                                                                                                                                           | Somewhat disagree                                                                                                                                                                                                                                                                                                                                                                                                                                                                       | 429   | <div><div></div></div> 9.1%  |
| 6                                                                                                                                                           | Disagree                                                                                                                                                                                                                                                                                                                                                                                                                                                                                | 249   | <div><div></div></div> 5.3%  |
| 7                                                                                                                                                           | Strongly disagree                                                                                                                                                                                                                                                                                                                                                                                                                                                                       | 80    | <div><div></div></div> 1.7%  |
| 97                                                                                                                                                          | No answer                                                                                                                                                                                                                                                                                                                                                                                                                                                                               | 35    | <div><div></div></div> 0.7%  |
| Warning: these figures indicate the number of cases found in the data file. They cannot be interpreted as summary statistics of the population of interest. |                                                                                                                                                                                                                                                                                                                                                                                                                                                                                         |       |                              |
| # r7ran2: [All respondents randomized. ]                                                                                                                    |                                                                                                                                                                                                                                                                                                                                                                                                                                                                                         |       |                              |
| Information                                                                                                                                                 | [Type= discrete] [Format=numeric] [Range= 1-2] [Missing=*]                                                                                                                                                                                                                                                                                                                                                                                                                              |       |                              |
| Statistics [NW/ W]                                                                                                                                          | [Valid=4681 /-] [Invalid=8 /-]                                                                                                                                                                                                                                                                                                                                                                                                                                                          |       |                              |
| Interviewer's instructions                                                                                                                                  | [All respondents randomized. ]                                                                                                                                                                                                                                                                                                                                                                                                                                                          |       |                              |
| Value                                                                                                                                                       | Label                                                                                                                                                                                                                                                                                                                                                                                                                                                                                   | Cases | Percentage                   |
| 1                                                                                                                                                           | 1                                                                                                                                                                                                                                                                                                                                                                                                                                                                                       | 2294  | <div><div></div></div> 49.0% |
| 2                                                                                                                                                           | 2                                                                                                                                                                                                                                                                                                                                                                                                                                                                                       | 2387  | <div><div></div></div> 51.0% |
| Sysmiss                                                                                                                                                     |                                                                                                                                                                                                                                                                                                                                                                                                                                                                                         | 8     |                              |
| Warning: these figures indicate the number of cases found in the data file. They cannot be interpreted as summary statistics of the population of interest. |                                                                                                                                                                                                                                                                                                                                                                                                                                                                                         |       |                              |
| # r7km13_1: Should put a greater stake into reducing emission in Norway, abroad or both                                                                     |                                                                                                                                                                                                                                                                                                                                                                                                                                                                                         |       |                              |
| Information                                                                                                                                                 | [Type= discrete] [Format=numeric] [Range= 1-3] [Missing=*]                                                                                                                                                                                                                                                                                                                                                                                                                              |       |                              |
| Statistics [NW/ W]                                                                                                                                          | [Valid=4689 /-] [Invalid=0 /-]                                                                                                                                                                                                                                                                                                                                                                                                                                                          |       |                              |
| Pre-question                                                                                                                                                | <p>Climate researchers are of the opinion that emission of greenhouse gases must be greatly reduced in order to counteract climate change caused by human activities.</p> <p>A debate is taking place to establish whether Norway should put a stake into such reductions in Norway or abroad. Reducing emissions abroad is often cheaper than in Norway, but measures abroad have also been criticised because the desired effect has not been achieved.</p> <p>What do you think?</p> |       |                              |
| Literal question                                                                                                                                            | Should the authorities put a greater stake into reducing emissions in Norway or abroad, or the same amount for both?                                                                                                                                                                                                                                                                                                                                                                    |       |                              |
| Interviewer's instructions                                                                                                                                  | [Asked if ran2=1. ]                                                                                                                                                                                                                                                                                                                                                                                                                                                                     |       |                              |
| Notes                                                                                                                                                       | Klimaforskerne mener at utslipp av drivhusgasser må reduseres kraftig dersom man ønsker å motvirke menneskeskapt klim                                                                                                                                                                                                                                                                                                                                                                   |       |                              |
| Value                                                                                                                                                       | Label                                                                                                                                                                                                                                                                                                                                                                                                                                                                                   | Cases | Percentage                   |
| 1                                                                                                                                                           | The authorities should concentrate most on reducing emissions in Norway                                                                                                                                                                                                                                                                                                                                                                                                                 | 521   | <div><div></div></div> 11.1% |
| 2                                                                                                                                                           | The authorities should concentrate most on reducing emissions abroad                                                                                                                                                                                                                                                                                                                                                                                                                    | 308   | <div><div></div></div> 6.6%  |
| 3                                                                                                                                                           | The authorities should concentrate on reducing emissions equally in Norway and abroad                                                                                                                                                                                                                                                                                                                                                                                                   | 1413  | <div><div></div></div> 30.1% |
| 97                                                                                                                                                          | No answer                                                                                                                                                                                                                                                                                                                                                                                                                                                                               | 52    | <div><div></div></div> 1.1%  |
| 98                                                                                                                                                          | Not asked                                                                                                                                                                                                                                                                                                                                                                                                                                                                               | 2395  | <div><div></div></div> 51.1% |
| Warning: these figures indicate the number of cases found in the data file. They cannot be interpreted as summary statistics of the population of interest. |                                                                                                                                                                                                                                                                                                                                                                                                                                                                                         |       |                              |
| # r7km13_2: Statement: Most of the reductions in emissions Norway has committed to should be carried out abroad                                             |                                                                                                                                                                                                                                                                                                                                                                                                                                                                                         |       |                              |
| Information                                                                                                                                                 | [Type= discrete] [Format=numeric] [Range= 1-7] [Missing=*]                                                                                                                                                                                                                                                                                                                                                                                                                              |       |                              |
| Statistics [NW/ W]                                                                                                                                          | [Valid=4689 /-] [Invalid=0 /-]                                                                                                                                                                                                                                                                                                                                                                                                                                                          |       |                              |
| Pre-question                                                                                                                                                | Please look at the statement below. To what extent do you agree or disagree with that?                                                                                                                                                                                                                                                                                                                                                                                                  |       |                              |
| Literal question                                                                                                                                            | “Most of the reductions in emissions of greenhouse gases that Norway has committed to should be carried out abroad”                                                                                                                                                                                                                                                                                                                                                                     |       |                              |



| # r7km13_2: Statement: Most of the reductions in emissions Norway has committed to should be carried out abroad                                             |                            |                                                                                                                                                                            |                              |
|-------------------------------------------------------------------------------------------------------------------------------------------------------------|----------------------------|----------------------------------------------------------------------------------------------------------------------------------------------------------------------------|------------------------------|
| Interviewer's instructions                                                                                                                                  |                            | [Asked if ran2=2. ]                                                                                                                                                        |                              |
| Notes                                                                                                                                                       |                            | Se på utsagnet nedenfor. Hvor enig eller uenig er du i det? «Mesteparten av utslippsreduksjonene av klimagasser som Nor                                                    |                              |
| Value                                                                                                                                                       | Label                      | Cases                                                                                                                                                                      | Percentage                   |
| 1                                                                                                                                                           | Strongly agree             | 120                                                                                                                                                                        | <div><div></div></div> 2.6%  |
| 2                                                                                                                                                           | Agree                      | 167                                                                                                                                                                        | <div><div></div></div> 3.6%  |
| 3                                                                                                                                                           | Somewhat agree             | 336                                                                                                                                                                        | <div><div></div></div> 7.2%  |
| 4                                                                                                                                                           | Neither agree nor disagree | 558                                                                                                                                                                        | <div><div></div></div> 11.9% |
| 5                                                                                                                                                           | Somewhat disagree          | 375                                                                                                                                                                        | <div><div></div></div> 8.0%  |
| 6                                                                                                                                                           | Disagree                   | 557                                                                                                                                                                        | <div><div></div></div> 11.9% |
| 7                                                                                                                                                           | Strongly disagree          | 254                                                                                                                                                                        | <div><div></div></div> 5.4%  |
| 97                                                                                                                                                          | No answer                  | 20                                                                                                                                                                         | <div><div></div></div> 0.4%  |
| 98                                                                                                                                                          | Not asked                  | 2302                                                                                                                                                                       | <div><div></div></div> 49.1% |
| Warning: these figures indicate the number of cases found in the data file. They cannot be interpreted as summary statistics of the population of interest. |                            |                                                                                                                                                                            |                              |
| # r7elite_1: Statement: We agree on which actions that needs to be completed, but little is happening because of the authorities                            |                            |                                                                                                                                                                            |                              |
| Information                                                                                                                                                 |                            | [Type= discrete] [Format=numeric] [Range= 1-7] [Missing=*]                                                                                                                 |                              |
| Statistics [NW/ W]                                                                                                                                          |                            | [Valid=4689 /-] [Invalid=0 /-]                                                                                                                                             |                              |
| Pre-question                                                                                                                                                |                            | How much do you agree or disagree with the following statements:                                                                                                           |                              |
| Literal question                                                                                                                                            |                            | We are in agreement regarding most of the actions that need to be completed in this country, but very little is happening because the authorities are standing in the way. |                              |
| Interviewer's instructions                                                                                                                                  |                            | [All respondents asked. ]                                                                                                                                                  |                              |
| Notes                                                                                                                                                       |                            | Vi er enige om de fleste ting som må gjøres i dette landet, men lite skjer fordi myndighetene står i veien. (Hvor enig                                                     |                              |
| Value                                                                                                                                                       | Label                      | Cases                                                                                                                                                                      | Percentage                   |
| 1                                                                                                                                                           | Strongly agree             | 151                                                                                                                                                                        | <div><div></div></div> 3.2%  |
| 2                                                                                                                                                           | Agree                      | 431                                                                                                                                                                        | <div><div></div></div> 9.2%  |
| 3                                                                                                                                                           | Somewhat agree             | 1200                                                                                                                                                                       | <div><div></div></div> 25.6% |
| 4                                                                                                                                                           | Neither agree nor disagree | 1035                                                                                                                                                                       | <div><div></div></div> 22.1% |
| 5                                                                                                                                                           | Somewhat disagree          | 713                                                                                                                                                                        | <div><div></div></div> 15.2% |
| 6                                                                                                                                                           | Disagree                   | 938                                                                                                                                                                        | <div><div></div></div> 20.0% |
| 7                                                                                                                                                           | Strongly disagree          | 150                                                                                                                                                                        | <div><div></div></div> 3.2%  |
| 97                                                                                                                                                          | No answer                  | 71                                                                                                                                                                         | <div><div></div></div> 1.5%  |
| Warning: these figures indicate the number of cases found in the data file. They cannot be interpreted as summary statistics of the population of interest. |                            |                                                                                                                                                                            |                              |
| # r7elite_2: Statement: Politicians maintain close contact with the electorate in the whole of the country                                                  |                            |                                                                                                                                                                            |                              |
| Information                                                                                                                                                 |                            | [Type= discrete] [Format=numeric] [Range= 1-7] [Missing=*]                                                                                                                 |                              |
| Statistics [NW/ W]                                                                                                                                          |                            | [Valid=4689 /-] [Invalid=0 /-]                                                                                                                                             |                              |
| Pre-question                                                                                                                                                |                            | How much do you agree or disagree with the following statements:                                                                                                           |                              |
| Literal question                                                                                                                                            |                            | Most of the professional politicians in Norway maintain close contact with the electorate in the whole of the country.                                                     |                              |
| Interviewer's instructions                                                                                                                                  |                            | [All respondents asked. ]                                                                                                                                                  |                              |
| Notes                                                                                                                                                       |                            | De fleste yrkespolitikere i Norge har god kontakt med velgere i hele landet. (Hvor enig eller uenig er du i følgende på                                                    |                              |
| Value                                                                                                                                                       | Label                      | Cases                                                                                                                                                                      | Percentage                   |
| 1                                                                                                                                                           | Strongly agree             | 12                                                                                                                                                                         | <div><div></div></div> 0.3%  |
| 2                                                                                                                                                           | Agree                      | 269                                                                                                                                                                        | <div><div></div></div> 5.7%  |
| 3                                                                                                                                                           | Somewhat agree             | 808                                                                                                                                                                        | <div><div></div></div> 17.2% |

| # r7elite_2: Statement: Politicians maintain close contact with the electorate in the whole of the country                                                  |                                                                                                                         |       |                              |
|-------------------------------------------------------------------------------------------------------------------------------------------------------------|-------------------------------------------------------------------------------------------------------------------------|-------|------------------------------|
| Value                                                                                                                                                       | Label                                                                                                                   | Cases | Percentage                   |
| 4                                                                                                                                                           | Neither agree nor disagree                                                                                              | 1033  | <div><div></div></div> 22.0% |
| 5                                                                                                                                                           | Somewhat disagree                                                                                                       | 1193  | <div><div></div></div> 25.4% |
| 6                                                                                                                                                           | Disagree                                                                                                                | 991   | <div><div></div></div> 21.1% |
| 7                                                                                                                                                           | Strongly disagree                                                                                                       | 319   | <div><div></div></div> 6.8%  |
| 97                                                                                                                                                          | No answer                                                                                                               | 64    | <div><div></div></div> 1.4%  |
| Warning: these figures indicate the number of cases found in the data file. They cannot be interpreted as summary statistics of the population of interest. |                                                                                                                         |       |                              |
| # r7elite_3: Statement: Many important decisions made by small group without ordinary people's knowledge                                                    |                                                                                                                         |       |                              |
| Information                                                                                                                                                 | [Type= discrete] [Format=numeric] [Range= 1-7] [Missing=*]                                                              |       |                              |
| Statistics [NW/ W]                                                                                                                                          | [Valid=4689 /-] [Invalid=0 /-]                                                                                          |       |                              |
| Pre-question                                                                                                                                                | How much do you agree or disagree with the following statements:                                                        |       |                              |
| Literal question                                                                                                                                            | In this country, many important decisions are made by a small group of people without the ordinary people being told.   |       |                              |
| Interviewer's instructions                                                                                                                                  | [All respondents asked. ]                                                                                               |       |                              |
| Notes                                                                                                                                                       | Mange viktige avgjørelser i dette landet blir tatt av en liten gruppe mennesker uten at vanlige folk får vite om det. ( |       |                              |
| Value                                                                                                                                                       | Label                                                                                                                   | Cases | Percentage                   |
| 1                                                                                                                                                           | Strongly agree                                                                                                          | 471   | <div><div></div></div> 10.0% |
| 2                                                                                                                                                           | Agree                                                                                                                   | 1158  | <div><div></div></div> 24.7% |
| 3                                                                                                                                                           | Somewhat agree                                                                                                          | 1528  | <div><div></div></div> 32.6% |
| 4                                                                                                                                                           | Neither agree nor disagree                                                                                              | 642   | <div><div></div></div> 13.7% |
| 5                                                                                                                                                           | Somewhat disagree                                                                                                       | 459   | <div><div></div></div> 9.8%  |
| 6                                                                                                                                                           | Disagree                                                                                                                | 326   | <div><div></div></div> 7.0%  |
| 7                                                                                                                                                           | Strongly disagree                                                                                                       | 47    | <div><div></div></div> 1.0%  |
| 97                                                                                                                                                          | No answer                                                                                                               | 58    | <div><div></div></div> 1.2%  |
| Warning: these figures indicate the number of cases found in the data file. They cannot be interpreted as summary statistics of the population of interest. |                                                                                                                         |       |                              |
| # r7elite_4: Statement: Difference between politicians same as between ordinary people                                                                      |                                                                                                                         |       |                              |
| Information                                                                                                                                                 | [Type= discrete] [Format=numeric] [Range= 1-7] [Missing=*]                                                              |       |                              |
| Statistics [NW/ W]                                                                                                                                          | [Valid=4689 /-] [Invalid=0 /-]                                                                                          |       |                              |
| Pre-question                                                                                                                                                | How much do you agree or disagree with the following statements:                                                        |       |                              |
| Literal question                                                                                                                                            | The differences amongst politicians are the same as between ordinary people.                                            |       |                              |
| Interviewer's instructions                                                                                                                                  | [All respondents asked. ]                                                                                               |       |                              |
| Notes                                                                                                                                                       | Det er like stor forskjell mellom politikere som det er mellom folk ellers. (Hvor enig eller uenig er du i følgende pås |       |                              |
| Value                                                                                                                                                       | Label                                                                                                                   | Cases | Percentage                   |
| 1                                                                                                                                                           | Strongly agree                                                                                                          | 468   | <div><div></div></div> 10.0% |
| 2                                                                                                                                                           | Agree                                                                                                                   | 1778  | <div><div></div></div> 37.9% |
| 3                                                                                                                                                           | Somewhat agree                                                                                                          | 1042  | <div><div></div></div> 22.2% |
| 4                                                                                                                                                           | Neither agree nor disagree                                                                                              | 589   | <div><div></div></div> 12.6% |
| 5                                                                                                                                                           | Somewhat disagree                                                                                                       | 446   | <div><div></div></div> 9.5%  |
| 6                                                                                                                                                           | Disagree                                                                                                                | 247   | <div><div></div></div> 5.3%  |
| 7                                                                                                                                                           | Strongly disagree                                                                                                       | 57    | <div><div></div></div> 1.2%  |
| 97                                                                                                                                                          | No answer                                                                                                               | 62    | <div><div></div></div> 1.3%  |
| Warning: these figures indicate the number of cases found in the data file. They cannot be interpreted as summary statistics of the population of interest. |                                                                                                                         |       |                              |
| # r7ran5: [Randomizes if u=2. ]                                                                                                                             |                                                                                                                         |       |                              |
| Information                                                                                                                                                 | [Type= discrete] [Format=numeric] [Range= 1-2] [Missing=*]                                                              |       |                              |

| # r7ran5: [Randomizes if u=2. ]                                                                                                                             |                                                                                                                                                                    |       |                   |
|-------------------------------------------------------------------------------------------------------------------------------------------------------------|--------------------------------------------------------------------------------------------------------------------------------------------------------------------|-------|-------------------|
| Statistics [NW/ W]                                                                                                                                          | [Valid=1195 /-] [Invalid=3494 /-]                                                                                                                                  |       |                   |
| Interviewer's instructions                                                                                                                                  | [Randomizes if u=2. ]                                                                                                                                              |       |                   |
| Value                                                                                                                                                       | Label                                                                                                                                                              | Cases | Percentage        |
| 1                                                                                                                                                           | 1                                                                                                                                                                  | 609   | <div></div> 51.0% |
| 2                                                                                                                                                           | 2                                                                                                                                                                  | 586   | <div></div> 49.0% |
| Sysmiss                                                                                                                                                     |                                                                                                                                                                    | 3494  |                   |
| Warning: these figures indicate the number of cases found in the data file. They cannot be interpreted as summary statistics of the population of interest. |                                                                                                                                                                    |       |                   |
| # r7mi4_1: Do leaders care mostly for themselves, or do they try to do what they feel is right?                                                             |                                                                                                                                                                    |       |                   |
| Information                                                                                                                                                 | [Type= discrete] [Format=numeric] [Range= 1-7] [Missing=*]                                                                                                         |       |                   |
| Statistics [NW/ W]                                                                                                                                          | [Valid=4689 /-] [Invalid=0 /-]                                                                                                                                     |       |                   |
| Pre-question                                                                                                                                                | Some are of the opinion that leaders normally care mostly for themselves. Others are of the opinion that they try their best to do what they feel is right.        |       |                   |
| Literal question                                                                                                                                            | What is your opinion?                                                                                                                                              |       |                   |
| Interviewer's instructions                                                                                                                                  | [Asked if u=2 and ran5=1. ]                                                                                                                                        |       |                   |
| Notes                                                                                                                                                       | Noen mener at ledere i sin alminnelighet bryr seg mest om seg selv. Andre mener at de prøver så godt de kan å gjøre                                                |       |                   |
| Value                                                                                                                                                       | Label                                                                                                                                                              | Cases | Percentage        |
| 1                                                                                                                                                           | Leaders care greatly for themselves                                                                                                                                | 28    | <div></div> 0.6%  |
| 2                                                                                                                                                           | Leaders care mostly for themselves                                                                                                                                 | 111   | <div></div> 2.4%  |
| 3                                                                                                                                                           | Leaders care somewhat for themselves                                                                                                                               | 118   | <div></div> 2.5%  |
| 4                                                                                                                                                           | Neither of these                                                                                                                                                   | 69    | <div></div> 1.5%  |
| 5                                                                                                                                                           | Leaders try somewhat to do what is right                                                                                                                           | 133   | <div></div> 2.8%  |
| 6                                                                                                                                                           | Leaders try mostly to do what is right                                                                                                                             | 133   | <div></div> 2.8%  |
| 7                                                                                                                                                           | Leaders try greatly to do what is right                                                                                                                            | 10    | <div></div> 0.2%  |
| 97                                                                                                                                                          | No answer                                                                                                                                                          | 7     | <div></div> 0.1%  |
| 98                                                                                                                                                          | Not asked                                                                                                                                                          | 4080  | <div></div> 87.0% |
| Warning: these figures indicate the number of cases found in the data file. They cannot be interpreted as summary statistics of the population of interest. |                                                                                                                                                                    |       |                   |
| # r7mi4_2: Do Muslim leaders care mostly for themselves, or do they try to do what they feel is right?                                                      |                                                                                                                                                                    |       |                   |
| Information                                                                                                                                                 | [Type= discrete] [Format=numeric] [Range= 1-7] [Missing=*]                                                                                                         |       |                   |
| Statistics [NW/ W]                                                                                                                                          | [Valid=4689 /-] [Invalid=0 /-]                                                                                                                                     |       |                   |
| Pre-question                                                                                                                                                | Some are of the opinion that Muslim leaders normally care mostly for themselves. Others are of the opinion that they try their best to do what they feel is right. |       |                   |
| Literal question                                                                                                                                            | What is your opinion?                                                                                                                                              |       |                   |
| Interviewer's instructions                                                                                                                                  | [Asked if u=2 and ran5=2. ]                                                                                                                                        |       |                   |
| Notes                                                                                                                                                       | Noen mener at muslimske ledere i sin alminnelighet bryr seg mest om seg selv. Andre mener at de prøver så godt de kan                                              |       |                   |
| Value                                                                                                                                                       | Label                                                                                                                                                              | Cases | Percentage        |
| 1                                                                                                                                                           | Muslim leaders care greatly for themselves                                                                                                                         | 68    | <div></div> 1.5%  |
| 2                                                                                                                                                           | Muslim leaders care mostly for themselves                                                                                                                          | 109   | <div></div> 2.3%  |
| 3                                                                                                                                                           | Muslim leaders care somewhat for themselves                                                                                                                        | 56    | <div></div> 1.2%  |
| 4                                                                                                                                                           | Neither of these                                                                                                                                                   | 158   | <div></div> 3.4%  |
| 5                                                                                                                                                           | Muslim leaders try somewhat to do what is right                                                                                                                    | 110   | <div></div> 2.3%  |
| 6                                                                                                                                                           | Muslim leaders try mostly to do what is right                                                                                                                      | 46    | <div></div> 1.0%  |
| 7                                                                                                                                                           | Muslim leaders try greatly to do what is right                                                                                                                     | 4     | <div></div> 0.1%  |
| 97                                                                                                                                                          | No answer                                                                                                                                                          | 35    | <div></div> 0.7%  |
| 98                                                                                                                                                          | Not asked                                                                                                                                                          | 4103  | <div></div> 87.5% |

|                                                                                                                                                                    |                                                                                                                                                                                                               |              |                   |
|--------------------------------------------------------------------------------------------------------------------------------------------------------------------|---------------------------------------------------------------------------------------------------------------------------------------------------------------------------------------------------------------|--------------|-------------------|
| <b># r7mi4_2: Do Muslim leaders care mostly for themselves, or do they try to do what they feel is right?</b>                                                      |                                                                                                                                                                                                               |              |                   |
| <i>Warning: these figures indicate the number of cases found in the data file. They cannot be interpreted as summary statistics of the population of interest.</i> |                                                                                                                                                                                                               |              |                   |
| <b># r7pad10_1: Statement: Immigrant children of parents that are illegal residents should be able to remain if parents deported</b>                               |                                                                                                                                                                                                               |              |                   |
| <b>Information</b>                                                                                                                                                 | [Type= discrete] [Format=numeric] [Range= 1-7] [Missing=*]                                                                                                                                                    |              |                   |
| <b>Statistics [NW/ W]</b>                                                                                                                                          | [Valid=4689 /-] [Invalid=0 /-]                                                                                                                                                                                |              |                   |
| <b>Pre-question</b>                                                                                                                                                | In general, to what extent do you disagree or agree with the following statements?                                                                                                                            |              |                   |
| <b>Literal question</b>                                                                                                                                            | Immigrant children of parents that are illegal residents in Norway should have the right to remain in the country if the parents are deported.                                                                |              |                   |
| <b>Interviewer's instructions</b>                                                                                                                                  | [Asked if u=3. ]                                                                                                                                                                                              |              |                   |
| <b>Notes</b>                                                                                                                                                       | Innvandrerbarn som har foreldre som oppholder seg ulovlig i Norge bør ha krav på å få bli i landet dersom foreldrene                                                                                          |              |                   |
| <b>Value</b>                                                                                                                                                       | <b>Label</b>                                                                                                                                                                                                  | <b>Cases</b> | <b>Percentage</b> |
| 1                                                                                                                                                                  | Strongly agree                                                                                                                                                                                                | 48           | 1.0%              |
| 2                                                                                                                                                                  | Agree                                                                                                                                                                                                         | 150          | 3.2%              |
| 3                                                                                                                                                                  | Somewhat agree                                                                                                                                                                                                | 222          | 4.7%              |
| 4                                                                                                                                                                  | Neither agree nor disagree                                                                                                                                                                                    | 186          | 4.0%              |
| 5                                                                                                                                                                  | Somewhat disagree                                                                                                                                                                                             | 169          | 3.6%              |
| 6                                                                                                                                                                  | Disagree                                                                                                                                                                                                      | 214          | 4.6%              |
| 7                                                                                                                                                                  | Strongly disagree                                                                                                                                                                                             | 94           | 2.0%              |
| 97                                                                                                                                                                 | No answer                                                                                                                                                                                                     | 20           | 0.4%              |
| 98                                                                                                                                                                 | Not asked                                                                                                                                                                                                     | 3586         | 76.5%             |
| <i>Warning: these figures indicate the number of cases found in the data file. They cannot be interpreted as summary statistics of the population of interest.</i> |                                                                                                                                                                                                               |              |                   |
| <b># r7pad10_2: Statement: If an employer supplies you with a phone, the employer should have the right to read text-messages/e-mails on the phone</b>             |                                                                                                                                                                                                               |              |                   |
| <b>Information</b>                                                                                                                                                 | [Type= discrete] [Format=numeric] [Range= 1-7] [Missing=*]                                                                                                                                                    |              |                   |
| <b>Statistics [NW/ W]</b>                                                                                                                                          | [Valid=4689 /-] [Invalid=0 /-]                                                                                                                                                                                |              |                   |
| <b>Pre-question</b>                                                                                                                                                | In general, to what extent do you disagree or agree with the following statements?                                                                                                                            |              |                   |
| <b>Literal question</b>                                                                                                                                            | If an employer supplies you with a mobile phone for use in connection with your employment, the employer should have the right to read all the text messages or e-mails you send and receive with this phone. |              |                   |
| <b>Interviewer's instructions</b>                                                                                                                                  | [Asked if u=3. ]                                                                                                                                                                                              |              |                   |
| <b>Notes</b>                                                                                                                                                       | Dersom en arbeidsgiver gir deg en mobiltelefon som skal brukes til arbeid, bør arbeidsgiveren ha lov til å lese alle te                                                                                       |              |                   |
| <b>Value</b>                                                                                                                                                       | <b>Label</b>                                                                                                                                                                                                  | <b>Cases</b> | <b>Percentage</b> |
| 1                                                                                                                                                                  | Strongly agree                                                                                                                                                                                                | 35           | 0.7%              |
| 2                                                                                                                                                                  | Agree                                                                                                                                                                                                         | 108          | 2.3%              |
| 3                                                                                                                                                                  | Somewhat agree                                                                                                                                                                                                | 85           | 1.8%              |
| 4                                                                                                                                                                  | Neither agree nor disagree                                                                                                                                                                                    | 72           | 1.5%              |
| 5                                                                                                                                                                  | Somewhat disagree                                                                                                                                                                                             | 96           | 2.0%              |
| 6                                                                                                                                                                  | Disagree                                                                                                                                                                                                      | 301          | 6.4%              |
| 7                                                                                                                                                                  | Strongly disagree                                                                                                                                                                                             | 388          | 8.3%              |
| 97                                                                                                                                                                 | No answer                                                                                                                                                                                                     | 18           | 0.4%              |
| 98                                                                                                                                                                 | Not asked                                                                                                                                                                                                     | 3586         | 76.5%             |
| <i>Warning: these figures indicate the number of cases found in the data file. They cannot be interpreted as summary statistics of the population of interest.</i> |                                                                                                                                                                                                               |              |                   |
| <b># r7pad10_3: Statement: Not possible to bring neighbour disputes to court before mediation</b>                                                                  |                                                                                                                                                                                                               |              |                   |
| <b>Information</b>                                                                                                                                                 | [Type= discrete] [Format=numeric] [Range= 1-7] [Missing=*]                                                                                                                                                    |              |                   |
| <b>Statistics [NW/ W]</b>                                                                                                                                          | [Valid=4689 /-] [Invalid=0 /-]                                                                                                                                                                                |              |                   |

|                                                                                                                                                                    |                                                                                                                                                                        |              |                   |
|--------------------------------------------------------------------------------------------------------------------------------------------------------------------|------------------------------------------------------------------------------------------------------------------------------------------------------------------------|--------------|-------------------|
| <b># r7pad10_3: Statement: Not possible to bring neighbour disputes to court before mediation</b>                                                                  |                                                                                                                                                                        |              |                   |
| <b>Pre-question</b>                                                                                                                                                | In general, to what extent do you disagree or agree with the following statements?                                                                                     |              |                   |
| <b>Literal question</b>                                                                                                                                            | It should not be possible to bring neighbour disputes (like the height of trees and fences) to court, without first having tried to resolve the conflict by mediation. |              |                   |
| <b>Interviewer's instructions</b>                                                                                                                                  | [Asked if u=3. ]                                                                                                                                                       |              |                   |
| <b>Notes</b>                                                                                                                                                       | Det bør ikke være lov å bringe nabokonflikter (for eksempel om høyde på trær og gjerder) inn for domstolene uten at                                                    |              |                   |
| <b>Value</b>                                                                                                                                                       | <b>Label</b>                                                                                                                                                           | <b>Cases</b> | <b>Percentage</b> |
| 1                                                                                                                                                                  | Strongly agree                                                                                                                                                         | 422          | 9.0%              |
| 2                                                                                                                                                                  | Agree                                                                                                                                                                  | 483          | 10.3%             |
| 3                                                                                                                                                                  | Somewhat agree                                                                                                                                                         | 79           | 1.7%              |
| 4                                                                                                                                                                  | Neither agree nor disagree                                                                                                                                             | 43           | 0.9%              |
| 5                                                                                                                                                                  | Somewhat disagree                                                                                                                                                      | 14           | 0.3%              |
| 6                                                                                                                                                                  | Disagree                                                                                                                                                               | 24           | 0.5%              |
| 7                                                                                                                                                                  | Strongly disagree                                                                                                                                                      | 16           | 0.3%              |
| 97                                                                                                                                                                 | No answer                                                                                                                                                              | 22           | 0.5%              |
| 98                                                                                                                                                                 | Not asked                                                                                                                                                              | 3586         | 76.5%             |
| <i>Warning: these figures indicate the number of cases found in the data file. They cannot be interpreted as summary statistics of the population of interest.</i> |                                                                                                                                                                        |              |                   |
| <b># r7k15_1: Can most people be trusted?</b>                                                                                                                      |                                                                                                                                                                        |              |                   |
| <b>Information</b>                                                                                                                                                 | [Type= discrete] [Format=numeric] [Range= 1-11] [Missing=*]                                                                                                            |              |                   |
| <b>Statistics [NW/ W]</b>                                                                                                                                          | [Valid=4689 /-] [Invalid=0 /-]                                                                                                                                         |              |                   |
| <b>Literal question</b>                                                                                                                                            | Would you say that most people in general can be trusted, or do you think that one cannot be careful enough when dealing with others?                                  |              |                   |
| <b>Post-question</b>                                                                                                                                               | State your opinion on the scale below. This goes from 0 to 10, where 0 means "Cannot be careful enough" and 10 means "Most people can be trusted".                     |              |                   |
| <b>Interviewer's instructions</b>                                                                                                                                  | [All respondents asked. ]                                                                                                                                              |              |                   |
| <b>Notes</b>                                                                                                                                                       | R7K15_1 (Vil du si at de fleste mennesker i sin alminnelighet er til å stole på, eller mener du at man ikke kan være f                                                 |              |                   |
| <b>Value</b>                                                                                                                                                       | <b>Label</b>                                                                                                                                                           | <b>Cases</b> | <b>Percentage</b> |
| 1                                                                                                                                                                  | 0 - Cannot be careful enough                                                                                                                                           | 68           | 1.5%              |
| 2                                                                                                                                                                  | 1                                                                                                                                                                      | 50           | 1.1%              |
| 3                                                                                                                                                                  | 2                                                                                                                                                                      | 116          | 2.5%              |
| 4                                                                                                                                                                  | 3                                                                                                                                                                      | 242          | 5.2%              |
| 5                                                                                                                                                                  | 4                                                                                                                                                                      | 239          | 5.1%              |
| 6                                                                                                                                                                  | 5                                                                                                                                                                      | 537          | 11.5%             |
| 7                                                                                                                                                                  | 6                                                                                                                                                                      | 506          | 10.8%             |
| 8                                                                                                                                                                  | 7                                                                                                                                                                      | 1104         | 23.5%             |
| 9                                                                                                                                                                  | 8                                                                                                                                                                      | 973          | 20.8%             |
| 10                                                                                                                                                                 | 9                                                                                                                                                                      | 415          | 8.9%              |
| 11                                                                                                                                                                 | 10- Most people can be trusted                                                                                                                                         | 382          | 8.1%              |
| 97                                                                                                                                                                 | No answer                                                                                                                                                              | 57           | 1.2%              |
| <i>Warning: these figures indicate the number of cases found in the data file. They cannot be interpreted as summary statistics of the population of interest.</i> |                                                                                                                                                                        |              |                   |
| <b># r7pad14_version: Randomly selects a version of the conjunction-experiment. Background variable conjunction experiment R7PAD14.</b>                            |                                                                                                                                                                        |              |                   |
| <b>Information</b>                                                                                                                                                 | [Type= discrete] [Format=numeric] [Range= 1-3] [Missing=*]                                                                                                             |              |                   |
| <b>Statistics [NW/ W]</b>                                                                                                                                          | [Valid=4659 /-] [Invalid=30 /-]                                                                                                                                        |              |                   |
| <b>Interviewer's instructions</b>                                                                                                                                  | [Randomly selects the number and combination of news and entertainment articles.]                                                                                      |              |                   |

**# r7pad14\_version: Randomly selects a version of the conjunction-experiment. Background variable conjunction experiment R7PAD14.**

| Value   | Label                                        | Cases | Percentage                                                                                |
|---------|----------------------------------------------|-------|-------------------------------------------------------------------------------------------|
| 1       | 4 news articles                              | 1576  | 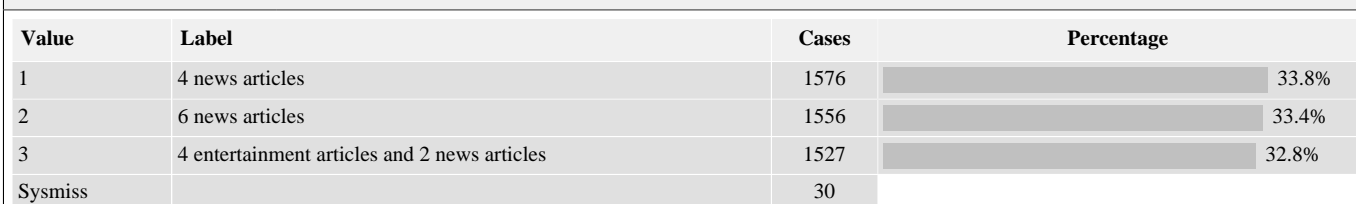 33.8% |
| 2       | 6 news articles                              | 1556  |  33.4% |
| 3       | 4 entertainment articles and 2 news articles | 1527  |  32.8% |
| Sysmiss |                                              | 30    |                                                                                           |

*Warning: these figures indicate the number of cases found in the data file. They cannot be interpreted as summary statistics of the population of interest.*

**# r7pad14\_selections: The number of articles the respondent can select. Background variable conjunction experiment R7PAD14.**

|                                   |                                                                                         |
|-----------------------------------|-----------------------------------------------------------------------------------------|
| <b>Information</b>                | [Type= discrete] [Format=numeric] [Range= 1-3] [Missing=*]                              |
| <b>Statistics [NW/ W]</b>         | [Valid=4659 /-] [Invalid=30 /-]                                                         |
| <b>Interviewer's instructions</b> | [Randomly selects, between 1 and 3, how many news articles the respondent may choose. ] |

| Value   | Label        | Cases | Percentage                                                                                |
|---------|--------------|-------|-------------------------------------------------------------------------------------------|
| 1       | 1 selection  | 1565  | 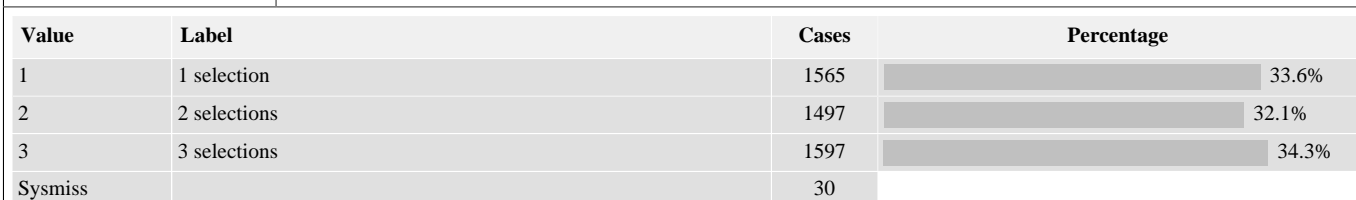 33.6% |
| 2       | 2 selections | 1497  |  32.1% |
| 3       | 3 selections | 1597  |  34.3% |
| Sysmiss |              | 30    |                                                                                           |

*Warning: these figures indicate the number of cases found in the data file. They cannot be interpreted as summary statistics of the population of interest.*

**# r7pad14\_sourcesRan\_1: Randomly chosen source nr. 1. Background variable conjunction experiment R7PAD14.**

|                                   |                                                 |
|-----------------------------------|-------------------------------------------------|
| <b>Information</b>                | [Type= discrete] [Format=character] [Missing=*] |
| <b>Statistics [NW/ W]</b>         | [Valid=4689 /-] [Invalid=0 /-]                  |
| <b>Interviewer's instructions</b> | [Source nr. 1]                                  |

| Value             | Label | Cases | Percentage                                                                                  |
|-------------------|-------|-------|---------------------------------------------------------------------------------------------|
|                   |       | 30    | 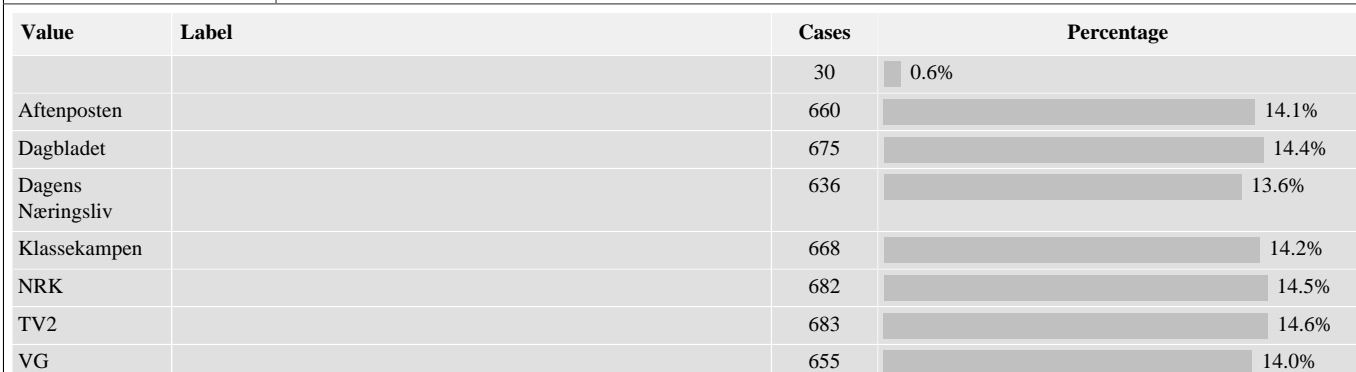 0.6%  |
| Aftenposten       |       | 660   |  14.1% |
| Dagbladet         |       | 675   |  14.4% |
| Dagens Næringsliv |       | 636   |  13.6% |
| Klassekampen      |       | 668   |  14.2% |
| NRK               |       | 682   |  14.5% |
| TV2               |       | 683   |  14.6% |
| VG                |       | 655   |  14.0% |

*Warning: these figures indicate the number of cases found in the data file. They cannot be interpreted as summary statistics of the population of interest.*

**# r7pad14\_sourcesRan\_2: Randomly chosen source nr. 2. Background variable conjunction experiment R7PAD14.**

|                                   |                                                 |
|-----------------------------------|-------------------------------------------------|
| <b>Information</b>                | [Type= discrete] [Format=character] [Missing=*] |
| <b>Statistics [NW/ W]</b>         | [Valid=4689 /-] [Invalid=0 /-]                  |
| <b>Interviewer's instructions</b> | [Source nr. 2]                                  |

| Value             | Label | Cases | Percentage                                                                                  |
|-------------------|-------|-------|---------------------------------------------------------------------------------------------|
|                   |       | 30    | 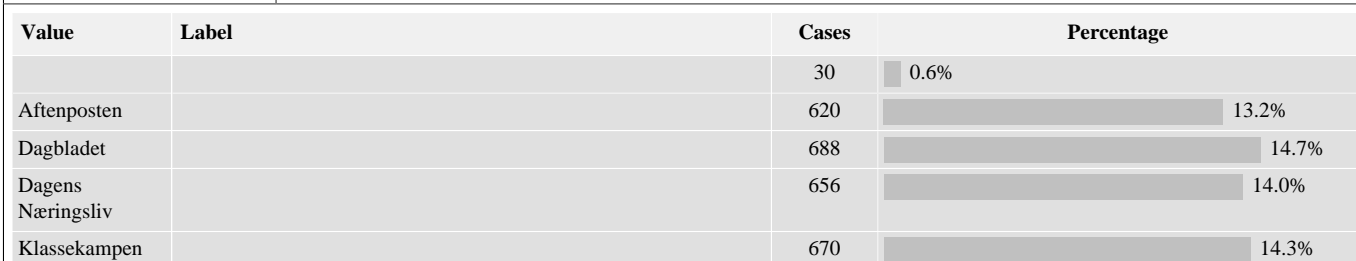 0.6%  |
| Aftenposten       |       | 620   |  13.2% |
| Dagbladet         |       | 688   |  14.7% |
| Dagens Næringsliv |       | 656   |  14.0% |
| Klassekampen      |       | 670   |  14.3% |

| # r7pad14_sourcesRan_2: Randomly chosen source nr. 2. Background variable conjunction experiment R7PAD14.                                                   |                                                 |       |                   |
|-------------------------------------------------------------------------------------------------------------------------------------------------------------|-------------------------------------------------|-------|-------------------|
| Value                                                                                                                                                       | Label                                           | Cases | Percentage        |
| NRK                                                                                                                                                         |                                                 | 702   | <div></div> 15.0% |
| TV2                                                                                                                                                         |                                                 | 643   | <div></div> 13.7% |
| VG                                                                                                                                                          |                                                 | 680   | <div></div> 14.5% |
| Warning: these figures indicate the number of cases found in the data file. They cannot be interpreted as summary statistics of the population of interest. |                                                 |       |                   |
| # r7pad14_sourcesRan_3: Randomly chosen source nr. 3. Background variable conjunction experiment R7PAD14.                                                   |                                                 |       |                   |
| Information                                                                                                                                                 | [Type= discrete] [Format=character] [Missing=*] |       |                   |
| Statistics [NW/ W]                                                                                                                                          | [Valid=4689 /-] [Invalid=0 /-]                  |       |                   |
| Interviewer's instructions                                                                                                                                  | [Source nr. 3]                                  |       |                   |
| Value                                                                                                                                                       | Label                                           | Cases | Percentage        |
|                                                                                                                                                             |                                                 | 30    | <div></div> 0.6%  |
| Aftenposten                                                                                                                                                 |                                                 | 673   | <div></div> 14.4% |
| Dagbladet                                                                                                                                                   |                                                 | 656   | <div></div> 14.0% |
| Dagens Næringsliv                                                                                                                                           |                                                 | 689   | <div></div> 14.7% |
| Klassekampen                                                                                                                                                |                                                 | 655   | <div></div> 14.0% |
| NRK                                                                                                                                                         |                                                 | 653   | <div></div> 13.9% |
| TV2                                                                                                                                                         |                                                 | 663   | <div></div> 14.1% |
| VG                                                                                                                                                          |                                                 | 670   | <div></div> 14.3% |
| Warning: these figures indicate the number of cases found in the data file. They cannot be interpreted as summary statistics of the population of interest. |                                                 |       |                   |
| # r7pad14_sourcesRan_4: Randomly chosen source nr. 4. Background variable conjunction experiment R7PAD14.                                                   |                                                 |       |                   |
| Information                                                                                                                                                 | [Type= discrete] [Format=character] [Missing=*] |       |                   |
| Statistics [NW/ W]                                                                                                                                          | [Valid=4689 /-] [Invalid=0 /-]                  |       |                   |
| Interviewer's instructions                                                                                                                                  | [Source nr. 4]                                  |       |                   |
| Value                                                                                                                                                       | Label                                           | Cases | Percentage        |
|                                                                                                                                                             |                                                 | 30    | <div></div> 0.6%  |
| Aftenposten                                                                                                                                                 |                                                 | 651   | <div></div> 13.9% |
| Dagbladet                                                                                                                                                   |                                                 | 680   | <div></div> 14.5% |
| Dagens Næringsliv                                                                                                                                           |                                                 | 679   | <div></div> 14.5% |
| Klassekampen                                                                                                                                                |                                                 | 658   | <div></div> 14.0% |
| NRK                                                                                                                                                         |                                                 | 666   | <div></div> 14.2% |
| TV2                                                                                                                                                         |                                                 | 647   | <div></div> 13.8% |
| VG                                                                                                                                                          |                                                 | 678   | <div></div> 14.5% |
| Warning: these figures indicate the number of cases found in the data file. They cannot be interpreted as summary statistics of the population of interest. |                                                 |       |                   |
| # r7pad14_sourcesRan_5: Randomly chosen source nr. 5. Background variable conjunction experiment R7PAD14.                                                   |                                                 |       |                   |
| Information                                                                                                                                                 | [Type= discrete] [Format=character] [Missing=*] |       |                   |
| Statistics [NW/ W]                                                                                                                                          | [Valid=4689 /-] [Invalid=0 /-]                  |       |                   |
| Interviewer's instructions                                                                                                                                  | [Source nr. 5]                                  |       |                   |
| Value                                                                                                                                                       | Label                                           | Cases | Percentage        |
|                                                                                                                                                             |                                                 | 1606  | <div></div> 34.3% |
| Aftenposten                                                                                                                                                 |                                                 | 443   | <div></div> 9.4%  |
| Dagbladet                                                                                                                                                   |                                                 | 417   | <div></div> 8.9%  |

| # r7pad14_sourcesRan_5: Randomly chosen source nr. 5. Background variable conjunction experiment R7PAD14.                                                   |                                                                                      |       |                   |
|-------------------------------------------------------------------------------------------------------------------------------------------------------------|--------------------------------------------------------------------------------------|-------|-------------------|
| Value                                                                                                                                                       | Label                                                                                | Cases | Percentage        |
| Dagens Næringsliv                                                                                                                                           |                                                                                      | 453   | <div></div> 9.7%  |
| Klassekampen                                                                                                                                                |                                                                                      | 433   | <div></div> 9.2%  |
| NRK                                                                                                                                                         |                                                                                      | 478   | <div></div> 10.2% |
| TV2                                                                                                                                                         |                                                                                      | 427   | <div></div> 9.1%  |
| VG                                                                                                                                                          |                                                                                      | 432   | <div></div> 9.2%  |
| Warning: these figures indicate the number of cases found in the data file. They cannot be interpreted as summary statistics of the population of interest. |                                                                                      |       |                   |
| # r7pad14_sourcesRan_6: Randomly chosen source nr. 6. Background variable conjunction experiment R7PAD14.                                                   |                                                                                      |       |                   |
| Information                                                                                                                                                 | [Type= discrete] [Format=character] [Missing=*]                                      |       |                   |
| Statistics [NW/ W]                                                                                                                                          | [Valid=4689 /-] [Invalid=0 /-]                                                       |       |                   |
| Interviewer's instructions                                                                                                                                  | [Source nr. 6]                                                                       |       |                   |
| Value                                                                                                                                                       | Label                                                                                | Cases | Percentage        |
|                                                                                                                                                             |                                                                                      | 1606  | <div></div> 34.3% |
| Aftenposten                                                                                                                                                 |                                                                                      | 441   | <div></div> 9.4%  |
| Dagbladet                                                                                                                                                   |                                                                                      | 474   | <div></div> 10.1% |
| Dagens Næringsliv                                                                                                                                           |                                                                                      | 412   | <div></div> 8.8%  |
| Klassekampen                                                                                                                                                |                                                                                      | 441   | <div></div> 9.4%  |
| NRK                                                                                                                                                         |                                                                                      | 444   | <div></div> 9.5%  |
| TV2                                                                                                                                                         |                                                                                      | 424   | <div></div> 9.0%  |
| VG                                                                                                                                                          |                                                                                      | 447   | <div></div> 9.5%  |
| Warning: these figures indicate the number of cases found in the data file. They cannot be interpreted as summary statistics of the population of interest. |                                                                                      |       |                   |
| # r7pad14_likes01: Dichotomy whether the articles should be listed with endorsements, or not. Background variable conjunction experiment R7PAD14.           |                                                                                      |       |                   |
| Information                                                                                                                                                 | [Type= discrete] [Format=numeric] [Range= 0-1] [Missing=*]                           |       |                   |
| Statistics [NW/ W]                                                                                                                                          | [Valid=4659 /-] [Invalid=30 /-]                                                      |       |                   |
| Interviewer's instructions                                                                                                                                  | [Randomly decides whether the articles should be listed with endorsements, or not. ] |       |                   |
| Value                                                                                                                                                       | Label                                                                                | Cases | Percentage        |
| 0                                                                                                                                                           | No                                                                                   | 2374  | <div></div> 51.0% |
| 1                                                                                                                                                           | Yes                                                                                  | 2285  | <div></div> 49.0% |
| Sysmiss                                                                                                                                                     |                                                                                      | 30    |                   |
| Warning: these figures indicate the number of cases found in the data file. They cannot be interpreted as summary statistics of the population of interest. |                                                                                      |       |                   |
| # r7pad14_likesRan_1: Randomly chosen endorsement nr. 1. Background variable conjunction experiment R7PAD14.                                                |                                                                                      |       |                   |
| Information                                                                                                                                                 | [Type= discrete] [Format=character] [Missing=*]                                      |       |                   |
| Statistics [NW/ W]                                                                                                                                          | [Valid=4689 /-] [Invalid=0 /-]                                                       |       |                   |
| Interviewer's instructions                                                                                                                                  | [If endorsements are to be listed: endorsement nr. 1]                                |       |                   |
| Value                                                                                                                                                       | Label                                                                                | Cases | Percentage        |
|                                                                                                                                                             |                                                                                      | 2404  | <div></div> 51.3% |
| 0 personer anbefaler                                                                                                                                        |                                                                                      | 754   | <div></div> 16.1% |
| 1054 personer anbefaler                                                                                                                                     |                                                                                      | 261   | <div></div> 5.6%  |
| 106 personer anbefaler                                                                                                                                      |                                                                                      | 269   | <div></div> 5.7%  |



### # r7pad14\_likesRan\_1: Randomly chosen endorsement nr. 1. Background variable conjunction experiment R7PAD14.

| Value                   | Label | Cases | Percentage |
|-------------------------|-------|-------|------------|
| 1133 personer anbefaler |       | 278   | 5.9%       |
| 1211 personer anbefaler |       | 236   | 5.0%       |
| 95 personer anbefaler   |       | 248   | 5.3%       |
| 98 personer anbefaler   |       | 239   | 5.1%       |

Warning: these figures indicate the number of cases found in the data file. They cannot be interpreted as summary statistics of the population of interest.

### # r7pad14\_likesRan\_2: Randomly chosen endorsement nr. 2. Background variable conjunction experiment R7PAD14.

|                                   |                                                       |
|-----------------------------------|-------------------------------------------------------|
| <b>Information</b>                | [Type= discrete] [Format=character] [Missing=*]       |
| <b>Statistics [NW/ W]</b>         | [Valid=4689 /-] [Invalid=0 /-]                        |
| <b>Interviewer's instructions</b> | [If endorsements are to be listed: endorsement nr. 2] |

| Value                   | Label | Cases | Percentage |
|-------------------------|-------|-------|------------|
|                         |       | 2404  | 51.3%      |
| 0 personer anbefaler    |       | 751   | 16.0%      |
| 1054 personer anbefaler |       | 256   | 5.5%       |
| 106 personer anbefaler  |       | 245   | 5.2%       |
| 1133 personer anbefaler |       | 235   | 5.0%       |
| 1211 personer anbefaler |       | 279   | 6.0%       |
| 95 personer anbefaler   |       | 244   | 5.2%       |
| 98 personer anbefaler   |       | 275   | 5.9%       |

Warning: these figures indicate the number of cases found in the data file. They cannot be interpreted as summary statistics of the population of interest.

### # r7pad14\_likesRan\_3: Randomly chosen endorsement nr. 3. Background variable conjunction experiment R7PAD14.

|                                   |                                                       |
|-----------------------------------|-------------------------------------------------------|
| <b>Information</b>                | [Type= discrete] [Format=character] [Missing=*]       |
| <b>Statistics [NW/ W]</b>         | [Valid=4689 /-] [Invalid=0 /-]                        |
| <b>Interviewer's instructions</b> | [If endorsements are to be listed: endorsement nr. 3] |

| Value                   | Label | Cases | Percentage |
|-------------------------|-------|-------|------------|
|                         |       | 2404  | 51.3%      |
| 0 personer anbefaler    |       | 768   | 16.4%      |
| 1054 personer anbefaler |       | 258   | 5.5%       |
| 106 personer anbefaler  |       | 237   | 5.1%       |
| 1133 personer anbefaler |       | 264   | 5.6%       |
| 1211 personer anbefaler |       | 250   | 5.3%       |
| 95 personer anbefaler   |       | 274   | 5.8%       |

# r7pad14\_likesRan\_3: Randomly chosen endorsement nr. 3. Background variable conjunction experiment R7PAD14.

| Value                 | Label | Cases | Percentage       |
|-----------------------|-------|-------|------------------|
| 98 personer anbefaler |       | 234   | <div></div> 5.0% |

*Warning: these figures indicate the number of cases found in the data file. They cannot be interpreted as summary statistics of the population of interest.*

#### # r7pad14\_likesRan\_4: Randomly chosen endorsement nr. 4. Background variable conjunction experiment R7PAD14.

|                                   |                                                       |
|-----------------------------------|-------------------------------------------------------|
| <b>Information</b>                | [Type= discrete] [Format=character] [Missing=*]       |
| <b>Statistics [NW/ W]</b>         | [Valid=4689 /-] [Invalid=0 /-]                        |
| <b>Interviewer's instructions</b> | [If endorsements are to be listed: endorsement nr. 4] |

| Value                   | Label | Cases | Percentage |
|-------------------------|-------|-------|------------|
|                         |       | 2404  | 51.3%      |
| 0 personer anbefaler    |       | 719   | 15.3%      |
| 1054 personer anbefaler |       | 243   | 5.2%       |
| 106 personer anbefaler  |       | 270   | 5.8%       |
| 1133 personer anbefaler |       | 250   | 5.3%       |
| 1211 personer anbefaler |       | 276   | 5.9%       |
| 95 personer anbefaler   |       | 266   | 5.7%       |
| 98 personer anbefaler   |       | 261   | 5.6%       |

*Warning: these figures indicate the number of cases found in the data file. They cannot be interpreted as summary statistics of the population of interest.*

#### # r7pad14\_likesRan\_5: Randomly chosen endorsement nr. 5. Background variable conjunction experiment R7PAD14.

|                                   |                                                       |
|-----------------------------------|-------------------------------------------------------|
| <b>Information</b>                | [Type= discrete] [Format=character] [Missing=*]       |
| <b>Statistics [NW/ W]</b>         | [Valid=4689 /-] [Invalid=0 /-]                        |
| <b>Interviewer's instructions</b> | [If endorsements are to be listed: endorsement nr. 5] |

| Value                   | Label | Cases | Percentage |
|-------------------------|-------|-------|------------|
|                         |       | 3175  | 67.7%      |
| 0 personer anbefaler    |       | 497   | 10.6%      |
| 1054 personer anbefaler |       | 158   | 3.4%       |
| 106 personer anbefaler  |       | 175   | 3.7%       |
| 1133 personer anbefaler |       | 168   | 3.6%       |
| 1211 personer anbefaler |       | 175   | 3.7%       |
| 95 personer anbefaler   |       | 167   | 3.6%       |
| 98 personer anbefaler   |       | 174   | 3.7%       |

*Warning: these figures indicate the number of cases found in the data file. They cannot be interpreted as summary statistics of the population of interest.*

#### # r7pad14\_likesRan\_6: Randomly chosen endorsement nr. 6. Background variable conjunction experiment R7PAD14.

|                                   |                                                       |
|-----------------------------------|-------------------------------------------------------|
| <b>Information</b>                | [Type= discrete] [Format=character] [Missing=*]       |
| <b>Statistics [NW/ W]</b>         | [Valid=4689 /-] [Invalid=0 /-]                        |
| <b>Interviewer's instructions</b> | [If endorsements are to be listed: endorsement nr. 6] |

| Value | Label | Cases | Percentage |
|-------|-------|-------|------------|
|       |       | 3175  | 67.7%      |

# # r7pad14\_likesRan\_6: Randomly chosen endorsement nr. 6. Background variable conjunction experiment R7PAD14.

| Value                   | Label | Cases | Percentage        |
|-------------------------|-------|-------|-------------------|
| 0 personer anbefaler    |       | 511   | <div></div> 10.9% |
| 1054 personer anbefaler |       | 167   | <div></div> 3.6%  |
| 106 personer anbefaler  |       | 188   | <div></div> 4.0%  |
| 1133 personer anbefaler |       | 169   | <div></div> 3.6%  |
| 1211 personer anbefaler |       | 144   | <div></div> 3.1%  |
| 95 personer anbefaler   |       | 164   | <div></div> 3.5%  |
| 98 personer anbefaler   |       | 171   | <div></div> 3.6%  |

Warning: these figures indicate the number of cases found in the data file. They cannot be interpreted as summary statistics of the population of interest.

## # r7pad14\_headlinesRan\_1: Randomly chosen article headline nr. 1. Background variable conjunction experiment R7PAD14. Background variable conjunction experiment R7PAD14.

|                            |                                                                                                                                                                                                          |
|----------------------------|----------------------------------------------------------------------------------------------------------------------------------------------------------------------------------------------------------|
| Information                | [Type= discrete] [Format=character] [Missing=*]                                                                                                                                                          |
| Statistics [NW/ W]         | [Valid=4689 /-] [Invalid=0 /-]                                                                                                                                                                           |
| Interviewer's instructions | [Stores a randomly selected news or entertainment article from a population of 1296 news articles and 36 entertainment articles. Contact Sveinung Arnesen or Mikael Johannesson for the complete list. ] |

## # r7pad14\_headlinesRan\_2: Randomly chosen article headline nr. 2. Background variable conjunction experiment R7PAD14. Background variable conjunction experiment R7PAD14.

|                            |                                                                                                                                                                                                          |
|----------------------------|----------------------------------------------------------------------------------------------------------------------------------------------------------------------------------------------------------|
| Information                | [Type= discrete] [Format=character] [Missing=*]                                                                                                                                                          |
| Statistics [NW/ W]         | [Valid=4689 /-] [Invalid=0 /-]                                                                                                                                                                           |
| Interviewer's instructions | [Stores a randomly selected news or entertainment article from a population of 1296 news articles and 36 entertainment articles. Contact Sveinung Arnesen or Mikael Johannesson for the complete list. ] |

## # r7pad14\_headlinesRan\_3: Randomly chosen article headline nr. 3. Background variable conjunction experiment R7PAD14. Background variable conjunction experiment R7PAD14.

|                            |                                                                                                                                                                                                          |
|----------------------------|----------------------------------------------------------------------------------------------------------------------------------------------------------------------------------------------------------|
| Information                | [Type= discrete] [Format=character] [Missing=*]                                                                                                                                                          |
| Statistics [NW/ W]         | [Valid=4689 /-] [Invalid=0 /-]                                                                                                                                                                           |
| Interviewer's instructions | [Stores a randomly selected news or entertainment article from a population of 1296 news articles and 36 entertainment articles. Contact Sveinung Arnesen or Mikael Johannesson for the complete list. ] |

## # r7pad14\_headlinesRan\_4: Randomly chosen article headline nr. 4. Background variable conjunction experiment R7PAD14. Background variable conjunction experiment R7PAD14.

|                            |                                                                                                                                                                                                          |
|----------------------------|----------------------------------------------------------------------------------------------------------------------------------------------------------------------------------------------------------|
| Information                | [Type= discrete] [Format=character] [Missing=*]                                                                                                                                                          |
| Statistics [NW/ W]         | [Valid=4689 /-] [Invalid=0 /-]                                                                                                                                                                           |
| Interviewer's instructions | [Stores a randomly selected news or entertainment article from a population of 1296 news articles and 36 entertainment articles. Contact Sveinung Arnesen or Mikael Johannesson for the complete list. ] |

## # r7pad14\_headlinesRan\_5: Randomly chosen article headline nr. 5. Background variable conjunction experiment R7PAD14. Background variable conjunction experiment R7PAD14.

|                            |                                                                                                                                                                                                          |
|----------------------------|----------------------------------------------------------------------------------------------------------------------------------------------------------------------------------------------------------|
| Information                | [Type= discrete] [Format=character] [Missing=*]                                                                                                                                                          |
| Statistics [NW/ W]         | [Valid=4689 /-] [Invalid=0 /-]                                                                                                                                                                           |
| Interviewer's instructions | [Stores a randomly selected news or entertainment article from a population of 1296 news articles and 36 entertainment articles. Contact Sveinung Arnesen or Mikael Johannesson for the complete list. ] |

# r7pad14\_headlinesRan\_5: Randomly chosen article headline nr. 5. Background variable conjunction experiment R7PAD14. Background variable conjunction experiment R7PAD14.

| Value                                                     | Label | Cases | Percentage |
|-----------------------------------------------------------|-------|-------|------------|
|                                                           |       | 1606  | 34.3%      |
| Ap-politiker fordømmes etter Facebook-innlegg: «vi tren   |       | 3     | 0.1%       |
| Ap-politiker får kjeft for forslag som vil redusere inn   |       | 1     | 0.0%       |
| Ap-politiker får kjeft for forslag som vil øke inntekts   |       | 1     | 0.0%       |
| Ap-politiker får massiv støtte - vil ikke åpne flere ol   |       | 3     | 0.1%       |
| Ap-politiker får massiv støtte - vil åpne flere oljefel   |       | 2     | 0.0%       |
| Ap-politiker får pepper for forslag: vil privatisere NS   |       | 2     | 0.0%       |
| Ap-politiker får ros etter facebook-status: «Homofile p   |       | 3     | 0.1%       |
| Ap-politiker får skryt for forslag som vil redusere inn   |       | 4     | 0.1%       |
| Ap-politiker får skryt for forslag som vil øke inntekts   |       | 2     | 0.0%       |
| Ap-politiker får skryt for forslag: vil nekte privatisere |       | 1     | 0.0%       |
| Ap-politiker får skryt for forslag: vil privatisere NSB   |       | 1     | 0.0%       |
| Ap-politiker hudflettes etter homofiendtlig lovforslag    |       | 4     | 0.1%       |
| Ap-politiker hudflettes etter homovennlig lovforslag      |       | 3     | 0.1%       |
| Ap-politiker hudflettes: mener det burde være vanskelig   |       | 2     | 0.0%       |

# r7pad14\_headlinesRan\_5: Randomly chosen article headline nr. 5. Background variable conjunction experiment R7PAD14. Background variable conjunction experiment R7PAD14.

| Value                                                       | Label | Cases | Percentage |
|-------------------------------------------------------------|-------|-------|------------|
| Ap-politiker hylles ? mener det er bedre med flere kult     |       | 4     | 0.1%       |
| Ap-politiker hylles ? mener det er bedre med færre kult     |       | 3     | 0.1%       |
| Ap-politiker lovprises etter Facebook-innlegg: «vi tren     |       | 3     | 0.1%       |
| Ap-politiker lovprises etter homofiendtlig lovforslag       |       | 3     | 0.1%       |
| Ap-politiker lovprises etter homovennlig lovforslag         |       | 4     | 0.1%       |
| Ap-politiker lovprises: mener det burde være vanskelige     |       | 2     | 0.0%       |
| Ap-politiker lovprises: mener det ikke burde være vanskelig |       | 5     | 0.1%       |
| Ap-politiker med Facebook-innlegg: «vi trenger flere mu     |       | 1     | 0.0%       |
| Ap-politiker med Facebook-innlegg: «vi trenger ikke fle     |       | 2     | 0.0%       |
| Ap-politiker med forslag som vil redusere inntektsforsk     |       | 3     | 0.1%       |
| Ap-politiker med forslag som vil øke inntektsforskjelle     |       | 2     | 0.0%       |
| Ap-politiker med homofiendtlig lovforslag                   |       | 2     | 0.0%       |
| Ap-politiker med homovennlig lovforslag                     |       | 2     | 0.0%       |
| Ap-politiker mener alle offentlige aktiviteter ikke kan     |       | 5     | 0.1%       |
| Ap-politiker mener alle offentlige                          |       | 3     | 0.1%       |

# r7pad14\_headlinesRan\_5: Randomly chosen article headline nr. 5. Background variable conjunction experiment R7PAD14. Background variable conjunction experiment R7PAD14.

| Value                                                               | Label | Cases | Percentage |
|---------------------------------------------------------------------|-------|-------|------------|
| aktiviteter kan<br>gjør                                             |       |       |            |
| Ap-politiker<br>mener det<br>burde være<br>vanskeligere for<br>homo |       | 8     | 0.2%       |
| Ap-politiker<br>mener det er<br>bedre med flere<br>kulturer og r    |       | 2     | 0.0%       |
| Ap-politiker<br>mener det er<br>bedre med færre<br>kulturer og r    |       | 5     | 0.1%       |
| Ap-politiker<br>mener det ikke<br>burde være<br>vanskeligere for    |       | 2     | 0.0%       |
| Ap-politiker<br>mener<br>flyktninger bør<br>ha samme rett til<br>so |       | 5     | 0.1%       |
| Ap-politiker<br>mener<br>flyktninger ikke<br>bør ha samme<br>rett t |       | 15    | 0.3%       |
| Ap-politiker<br>møter massiv<br>motstand - vil<br>ikke åpne fler    |       | 3     | 0.1%       |
| Ap-politiker<br>presenterer<br>forslag: vil nekte<br>privatiseri    |       | 3     | 0.1%       |
| Ap-politiker<br>presenterer<br>forslag: vil<br>privatisere NSB      |       | 4     | 0.1%       |
| Ap-politiker<br>på Facebook:<br>«Homofile par<br>MÅ IKKE få<br>like |       | 2     | 0.0%       |
| Ap-politiker<br>skjelles ut ?<br>mener det er<br>bedre med flere    |       | 4     | 0.1%       |
| Ap-politiker vil<br>ikke åpne flere<br>oljefelt i nord              |       | 3     | 0.1%       |
| Ap-politiker<br>vil åpne flere<br>oljefelt i nord                   |       | 3     | 0.1%       |
| Ap-profil blir<br>hedret etter                                      |       | 1     | 0.0%       |

# r7pad14\_headlinesRan\_5: Randomly chosen article headline nr. 5. Background variable conjunction experiment R7PAD14. Background variable conjunction experiment R7PAD14.

| Value                                                    | Label | Cases | Percentage |
|----------------------------------------------------------|-------|-------|------------|
| twittermelding ? vil stenge                              |       |       |            |
| Ap-profil blir hedret etter twittermelding ? vil åpne f  |       | 2     | 0.0%       |
| Ap-profil blir latterliggjort etter twittermelding ? vil |       | 4     | 0.1%       |
| Ap-profil i åpent brev: «jeg vil IKKE at flyktinger ska  |       | 5     | 0.1%       |
| Ap-profil i åpent brev: «jeg vil at flyktinger skal få   |       | 2     | 0.0%       |
| Ap-profil lanserer forslag om flere privatskoler i Norg  |       | 3     | 0.1%       |
| Ap-profil lanserer forslag om færre privatskoler i Norg  |       | 3     | 0.1%       |
| Ap-profil mener at kommersielle skoler bør forbys        |       | 3     | 0.1%       |
| Ap-profil mener at kommersielle skoler bør tillates      |       | 2     | 0.0%       |
| Ap-profil møter begeistring - mener at kommersielle sko  |       | 2     | 0.0%       |
| Ap-profil møter begeistring for forslag om flere privat  |       | 2     | 0.0%       |
| Ap-profil møter proteststorm - mener at kommersielle sk  |       | 3     | 0.1%       |
| Ap-profil møter proteststorm for forslag om flere priva  |       | 2     | 0.0%       |
| Ap-profil på twitter: vil stenge for oljeboring i nord   |       | 3     | 0.1%       |
| Ap-profil på twitter: vil åpne                           |       | 4     | 0.1%       |



# r7pad14\_headlinesRan\_5: Randomly chosen article headline nr. 5. Background variable conjunction experiment R7PAD14. Background variable conjunction experiment R7PAD14.

| Value                                                   | Label | Cases | Percentage |
|---------------------------------------------------------|-------|-------|------------|
| for oljeboring i nord                                   |       |       |            |
| Ap-representant refses ? vil sikre at ingen private sko |       | 2     | 0.0%       |
| Ap-representant refses ? vil åpne for at noen private s |       | 3     | 0.1%       |
| Ap-representant roses ? vil åpne for at noen private sk |       | 1     | 0.0%       |
| Ap-representant vil sikre at ingen private skoler skal  |       | 2     | 0.0%       |
| Ap-representant vil åpne for at noen private skoler ska |       | 3     | 0.1%       |
| Ap-topp kjemper for oljeboring i Lofoten                |       | 3     | 0.1%       |
| Ap-topp kjemper for oljeboring i Lofoten - får massiv s |       | 3     | 0.1%       |
| Ap-topp kjemper for oljeboring i Lofoten - møter massiv |       | 4     | 0.1%       |
| Ap-topp kjemper mot oljeboring i Lofoten                |       | 1     | 0.0%       |
| Ap-topp kjemper mot oljeboring i Lofoten - får massiv s |       | 4     | 0.1%       |
| Ap-topp mener at skattenivået burde reduseres           |       | 5     | 0.1%       |
| Ap-topp mener at skattenivået ikke burde reduseres      |       | 2     | 0.0%       |
| Ap-topp presser på for å gi NAV-penger til Syriske flyk |       | 2     | 0.0%       |
| Ap-topp truer med å ta NAV-penger fra Syriske flyktinge |       | 6     | 0.1%       |
| Ap-topp vil gi mer til de rike                          |       | 4     | 0.1%       |

# r7pad14\_headlinesRan\_5: Randomly chosen article headline nr. 5. Background variable conjunction experiment R7PAD14. Background variable conjunction experiment R7PAD14.

| Value                                                   | Label | Cases | Percentage |
|---------------------------------------------------------|-------|-------|------------|
| Ap-topp vil gi mer til de rike - blir refset            |       | 1     | 0.0%       |
| Ap-topp vil ta mer fra de rike                          |       | 2     | 0.0%       |
| Ap-topp vil ta mer fra de rike - blir refset            |       | 2     | 0.0%       |
| Ap-topp vil ta mer fra de rike - blir roset             |       | 3     | 0.1%       |
| Ap-topp: Vil avskaffe eiendomsskatten i alle norske bye |       | 2     | 0.0%       |
| Ap-topp: Vil innføre eiendomsskatt i alle norske byer.  |       | 2     | 0.0%       |
| Denne restauranten er testet av våre anmeldere          |       | 16    | 0.3%       |
| Denne restauranten må du prøve mener våre anmeldere     |       | 15    | 0.3%       |
| Denne restauranten må du unngå mener våre anmeldere     |       | 13    | 0.3%       |
| Dette er det beste for å gå ned i vekt                  |       | 10    | 0.2%       |
| Dette er det verste for å gå ned i vekt                 |       | 9     | 0.2%       |
| Dette er høstens treningstrend                          |       | 17    | 0.4%       |
| Dette kan du gjøre for å ned i vekt                     |       | 20    | 0.4%       |
| Disse TV-ene er med i vår nye test                      |       | 11    | 0.2%       |
| Disse TV-ene kommer best ut i vår nye test              |       | 17    | 0.4%       |
| Disse TV-ene kommer verst ut i vår nye test             |       | 7     | 0.1%       |
| Flere jubler: Ap-topp mener at skattenivået burde redus |       | 1     | 0.0%       |
| Flere jubler: Frp-topp mener                            |       | 1     | 0.0%       |

# r7pad14\_headlinesRan\_5: Randomly chosen article headline nr. 5. Background variable conjunction experiment R7PAD14. Background variable conjunction experiment R7PAD14.

| Value                                                   | Label | Cases | Percentage |
|---------------------------------------------------------|-------|-------|------------|
| at skattenivået burde redu                              |       |       |            |
| Flere jubler: Frp-topp mener at skattenivået ikke burde |       | 5     | 0.1%       |
| Flere jubler: Høyre-topp mener at skattenivået burde re |       | 1     | 0.0%       |
| Flere jubler: Høyre-topp mener at skattenivået ikke bur |       | 4     | 0.1%       |
| Flere jubler: Krf-topp mener at skattenivået burde redu |       | 1     | 0.0%       |
| Flere jubler: Mdg-topp mener at skattenivået burde redu |       | 3     | 0.1%       |
| Flere jubler: Mdg-topp mener at skattenivået ikke burde |       | 4     | 0.1%       |
| Flere jubler: Rødt-topp mener at skattenivået burde red |       | 2     | 0.0%       |
| Flere jubler: Rødt-topp mener at skattenivået ikke burd |       | 2     | 0.0%       |
| Flere jubler: Sp-topp mener at skattenivået burde redus |       | 1     | 0.0%       |
| Flere jubler: Sp-topp mener at skattenivået ikke burde  |       | 3     | 0.1%       |
| Flere jubler: Sv-topp mener at skattenivået ikke burde  |       | 1     | 0.0%       |
| Flere jubler: Venstre-topp mener at skattenivået burde  |       | 2     | 0.0%       |
| Flere jubler: Venstre-topp mener at skattenivået ikke b |       | 3     | 0.1%       |

# r7pad14\_headlinesRan\_5: Randomly chosen article headline nr. 5. Background variable conjunction experiment R7PAD14. Background variable conjunction experiment R7PAD14.

| Value                                                               | Label | Cases | Percentage |
|---------------------------------------------------------------------|-------|-------|------------|
| Flere stormer:<br>Ap-topp mener<br>at skattenivået<br>burde redu    |       | 2     | 0.0%       |
| Flere stormer:<br>Ap-topp mener<br>at skattenivået<br>ikke burde    |       | 2     | 0.0%       |
| Flere stormer:<br>Frp-topp mener<br>at skattenivået<br>burde red    |       | 4     | 0.1%       |
| Flere stormer:<br>Frp-topp mener<br>at skattenivået<br>ikke burd    |       | 3     | 0.1%       |
| Flere stormer:<br>Høyre-topp<br>mener at<br>skattenivået ikke<br>bu |       | 1     | 0.0%       |
| Flere stormer:<br>Krf-topp mener<br>at skattenivået<br>burde red    |       | 2     | 0.0%       |
| Flere stormer:<br>Krf-topp mener<br>at skattenivået<br>ikke burd    |       | 1     | 0.0%       |
| Flere stormer:<br>Mdg-topp mener<br>at skattenivået<br>burde red    |       | 2     | 0.0%       |
| Flere stormer:<br>Mdg-topp mener<br>at skattenivået<br>ikke burd    |       | 2     | 0.0%       |
| Flere stormer:<br>Rødt-topp mener<br>at skattenivået<br>burde re    |       | 2     | 0.0%       |
| Flere stormer:<br>Sp-topp mener<br>at skattenivået<br>burde redu    |       | 1     | 0.0%       |
| Flere stormer:<br>Sv-topp mener<br>at skattenivået<br>burde redu    |       | 2     | 0.0%       |
| Flere stormer:<br>Sv-topp mener at<br>skattenivået ikke<br>burde    |       | 1     | 0.0%       |
| Flere stormer:<br>Venstre-topp<br>mener at<br>skattenivået ikke     |       | 1     | 0.0%       |

# r7pad14\_headlinesRan\_5: Randomly chosen article headline nr. 5. Background variable conjunction experiment R7PAD14. Background variable conjunction experiment R7PAD14.

| Value                                                   | Label | Cases | Percentage                                                                               |
|---------------------------------------------------------|-------|-------|------------------------------------------------------------------------------------------|
| Foreslår å la kommunen ta seg av eldreomsorgen, ansvarl |       | 65    | 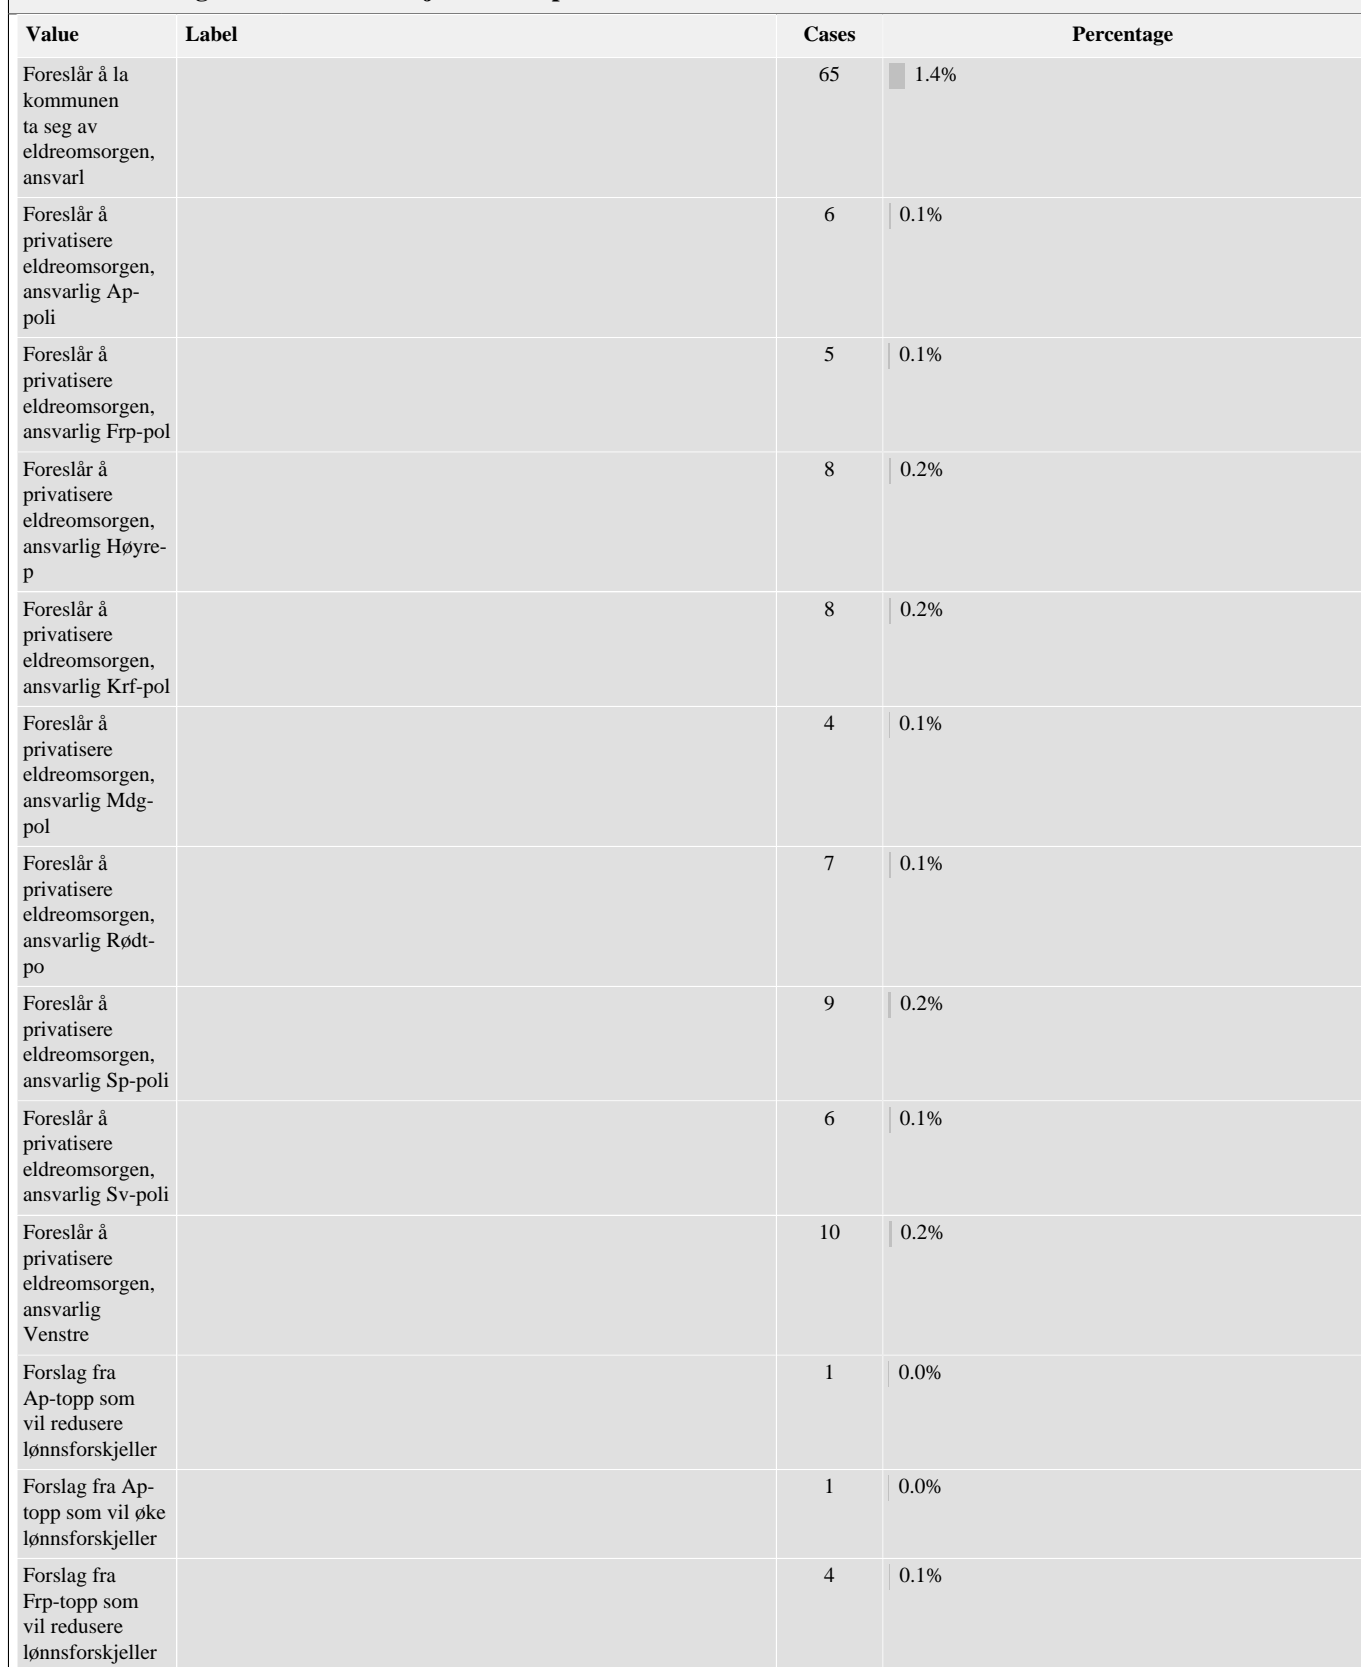 1.4% |
| Foreslår å privatisere eldreomsorgen, ansvarlig Ap-poli |       | 6     | 0.1%                                                                                     |
| Foreslår å privatisere eldreomsorgen, ansvarlig Frp-pol |       | 5     | 0.1%                                                                                     |
| Foreslår å privatisere eldreomsorgen, ansvarlig Høyre-p |       | 8     | 0.2%                                                                                     |
| Foreslår å privatisere eldreomsorgen, ansvarlig Krf-pol |       | 8     | 0.2%                                                                                     |
| Foreslår å privatisere eldreomsorgen, ansvarlig Mdg-pol |       | 4     | 0.1%                                                                                     |
| Foreslår å privatisere eldreomsorgen, ansvarlig Rødt-po |       | 7     | 0.1%                                                                                     |
| Foreslår å privatisere eldreomsorgen, ansvarlig Sp-poli |       | 9     | 0.2%                                                                                     |
| Foreslår å privatisere eldreomsorgen, ansvarlig Sv-poli |       | 6     | 0.1%                                                                                     |
| Foreslår å privatisere eldreomsorgen, ansvarlig Venstre |       | 10    | 0.2%                                                                                     |
| Forslag fra Ap-topp som vil redusere lønnsforskjeller   |       | 1     | 0.0%                                                                                     |
| Forslag fra Ap-topp som vil øke lønnsforskjeller        |       | 1     | 0.0%                                                                                     |
| Forslag fra Frp-topp som vil redusere lønnsforskjeller  |       | 4     | 0.1%                                                                                     |

# r7pad14\_headlinesRan\_5: Randomly chosen article headline nr. 5. Background variable conjunction experiment R7PAD14. Background variable conjunction experiment R7PAD14.

| Value                                                   | Label | Cases | Percentage |
|---------------------------------------------------------|-------|-------|------------|
| Forslag fra Frp-topp som vil øke lønnsforskjeller       |       | 1     | 0.0%       |
| Forslag fra Høyre-topp som vil redusere lønnsforskjelle |       | 3     | 0.1%       |
| Forslag fra Høyre-topp som vil øke lønnsforskjeller     |       | 2     | 0.0%       |
| Forslag fra Krf-topp som vil redusere lønnsforskjeller  |       | 4     | 0.1%       |
| Forslag fra Krf-topp som vil øke lønnsforskjeller       |       | 4     | 0.1%       |
| Forslag fra Mdg-topp som vil redusere lønnsforskjeller  |       | 3     | 0.1%       |
| Forslag fra Mdg-topp som vil øke lønnsforskjeller       |       | 2     | 0.0%       |
| Forslag fra Rødt-topp som vil redusere lønnsforskjeller |       | 3     | 0.1%       |
| Forslag fra Rødt-topp som vil øke lønnsforskjeller      |       | 2     | 0.0%       |
| Forslag fra Sp-topp som vil redusere lønnsforskjeller   |       | 2     | 0.0%       |
| Forslag fra Sv-topp som vil redusere lønnsforskjeller   |       | 1     | 0.0%       |
| Forslag fra Sv-topp som vil øke lønnsforskjeller        |       | 3     | 0.1%       |
| Forslag fra Venstre-topp som vil redusere lønnsforskjel |       | 2     | 0.0%       |
| Forslag fra Venstre-topp som vil øke lønnsforskjeller   |       | 2     | 0.0%       |
| Frp-politiker fordømmes etter Facebook-innlegg: «vi tre |       | 2     | 0.0%       |
| Frp-politiker får kjeft for forslag                     |       | 6     | 0.1%       |

# r7pad14\_headlinesRan\_5: Randomly chosen article headline nr. 5. Background variable conjunction experiment R7PAD14. Background variable conjunction experiment R7PAD14.

| Value                                                   | Label | Cases | Percentage |
|---------------------------------------------------------|-------|-------|------------|
| som vil redusere in                                     |       |       |            |
| Frp-politiker får kjeft for forslag som vil øke inntekt |       | 4     | 0.1%       |
| Frp-politiker får kritikk etter facebook-status: «Homof |       | 6     | 0.1%       |
| Frp-politiker får massiv støtte - vil ikke åpne flere o |       | 4     | 0.1%       |
| Frp-politiker får massiv støtte - vil åpne flere oljefe |       | 1     | 0.0%       |
| Frp-politiker får pepper for forslag: vil nekte privati |       | 1     | 0.0%       |
| Frp-politiker får ros etter facebook-status: «Homofile  |       | 1     | 0.0%       |
| Frp-politiker får skryt for forslag som vil redusere in |       | 2     | 0.0%       |
| Frp-politiker får skryt for forslag som vil øke inntekt |       | 2     | 0.0%       |
| Frp-politiker får skryt for forslag: vil nekte privatis |       | 5     | 0.1%       |
| Frp-politiker får skryt for forslag: vil privatisere NS |       | 1     | 0.0%       |
| Frp-politiker hudflettes etter homofiendtlig lovforslag |       | 1     | 0.0%       |
| Frp-politiker hudflettes: mener det burde være vanskel  |       | 4     | 0.1%       |
| Frp-politiker hudflettes: mener det ikke burde være van |       | 4     | 0.1%       |
| Frp-politiker hylles ? mener det er bedre med flere kul |       | 2     | 0.0%       |

# r7pad14\_headlinesRan\_5: Randomly chosen article headline nr. 5. Background variable conjunction experiment R7PAD14. Background variable conjunction experiment R7PAD14.

| Value                                                   | Label | Cases | Percentage |
|---------------------------------------------------------|-------|-------|------------|
| Frp-politiker hylles ? mener det er bedre med færre kul |       | 2     | 0.0%       |
| Frp-politiker lovprises etter Facebook-innlegg: «vi tre |       | 3     | 0.1%       |
| Frp-politiker lovprises etter homovennlig lovforslag    |       | 4     | 0.1%       |
| Frp-politiker lovprises: mener det ikke burde være vans |       | 2     | 0.0%       |
| Frp-politiker med Facebook-innlegg: «vi trenger flere m |       | 5     | 0.1%       |
| Frp-politiker med forslag som vil øke inntektsforskjell |       | 1     | 0.0%       |
| Frp-politiker med homovennlig lovforslag                |       | 4     | 0.1%       |
| Frp-politiker mener alle offentlige aktiviteter ikke ka |       | 3     | 0.1%       |
| Frp-politiker mener alle offentlige aktiviteter kan gjø |       | 4     | 0.1%       |
| Frp-politiker mener det burde være vanskeligere for hom |       | 3     | 0.1%       |
| Frp-politiker mener det er bedre med flere kulturer og  |       | 5     | 0.1%       |
| Frp-politiker mener det ikke burde være vanskeligere fo |       | 1     | 0.0%       |
| Frp-politiker mener flyktninger bør ha samme rett til s |       | 5     | 0.1%       |
| Frp-politiker mener flyktninger ikke                    |       | 4     | 0.1%       |



# r7pad14\_headlinesRan\_5: Randomly chosen article headline nr. 5. Background variable conjunction experiment R7PAD14. Background variable conjunction experiment R7PAD14.

| Value                                                    | Label | Cases | Percentage |
|----------------------------------------------------------|-------|-------|------------|
| bør ha samme rett                                        |       |       |            |
| Frp-politiker møter massiv motstand - vil ikke åpne fle  |       | 2     | 0.0%       |
| Frp-politiker møter massiv motstand - vil åpne flere ol  |       | 1     | 0.0%       |
| Frp-politiker presenterer forslag: vil nekte privatiser  |       | 1     | 0.0%       |
| Frp-politiker presenterer forslag: vil privatisere NSB   |       | 2     | 0.0%       |
| Frp-politiker på Facebook: «Homofile par MÅ IKKE få lik  |       | 2     | 0.0%       |
| Frp-politiker skjelles ut ? mener det er bedre med fler  |       | 1     | 0.0%       |
| Frp-politiker vil åpne flere oljefelt i nord             |       | 3     | 0.1%       |
| Frp-profil blir hedret etter twittermelding ? vil steng  |       | 1     | 0.0%       |
| Frp-profil blir hedret etter twittermelding ? vil åpne   |       | 1     | 0.0%       |
| Frp-profil blir latterliggjort etter twittermelding ? vi |       | 10    | 0.2%       |
| Frp-profil i åpent brev: «jeg vil IKKE at flyktinger sk  |       | 6     | 0.1%       |
| Frp-profil i åpent brev: «jeg vil at flyktinger skal få  |       | 9     | 0.2%       |
| Frp-profil lanserer forslag om flere privatskoler i Nor  |       | 1     | 0.0%       |
| Frp-profil lanserer forslag om færre privatskoler i Nor  |       | 3     | 0.1%       |

# r7pad14\_headlinesRan\_5: Randomly chosen article headline nr. 5. Background variable conjunction experiment R7PAD14. Background variable conjunction experiment R7PAD14.

| Value                                                   | Label | Cases | Percentage |
|---------------------------------------------------------|-------|-------|------------|
| Frp-profil mener at kommersielle skoler bør tillates    |       | 2     | 0.0%       |
| Frp-profil møter begeistring - mener at kommersielle sk |       | 6     | 0.1%       |
| Frp-profil møter begeistring for forslag om flere priva |       | 5     | 0.1%       |
| Frp-profil møter proteststorm - mener at kommersielle s |       | 7     | 0.1%       |
| Frp-profil møter proteststorm for forslag om flere priv |       | 3     | 0.1%       |
| Frp-profil møter proteststorm for forslag om færre priv |       | 2     | 0.0%       |
| Frp-profil på twitter: vil stenge for oljeboring i nord |       | 4     | 0.1%       |
| Frp-profil på twitter: vil åpne for oljeboring i nord   |       | 2     | 0.0%       |
| Frp-representant refses ? vil sikre at ingen private sk |       | 1     | 0.0%       |
| Frp-representant refses ? vil åpne for at noen private  |       | 2     | 0.0%       |
| Frp-representant roses ? vil åpne for at noen private s |       | 4     | 0.1%       |
| Frp-representant vil åpne for at noen private skoler sk |       | 3     | 0.1%       |
| Frp-topp kjemper for oljeboring i Lofoten               |       | 2     | 0.0%       |
| Frp-topp kjemper for oljeboring i Lofoten - møter massi |       | 2     | 0.0%       |

# r7pad14\_headlinesRan\_5: Randomly chosen article headline nr. 5. Background variable conjunction experiment R7PAD14. Background variable conjunction experiment R7PAD14.

| Value                                                   | Label | Cases | Percentage |
|---------------------------------------------------------|-------|-------|------------|
| Frp-topp kjemper mot oljeboring i Lofoten               |       | 2     | 0.0%       |
| Frp-topp kjemper mot oljeboring i Lofoten - får massiv  |       | 1     | 0.0%       |
| Frp-topp kjemper mot oljeboring i Lofoten - møter massi |       | 1     | 0.0%       |
| Frp-topp mener at skattenivået burde reduseres          |       | 1     | 0.0%       |
| Frp-topp mener at skattenivået ikke burde reduseres     |       | 1     | 0.0%       |
| Frp-topp presser på for å gi NAV-penger til Syriske fly |       | 4     | 0.1%       |
| Frp-topp truer med å ta NAV-penger fra Syriske flykting |       | 4     | 0.1%       |
| Frp-topp vil gi mer til de rike                         |       | 2     | 0.0%       |
| Frp-topp vil gi mer til de rike - blir refset           |       | 2     | 0.0%       |
| Frp-topp vil gi mer til de rike - blir roset            |       | 1     | 0.0%       |
| Frp-topp vil ta mer fra de rike                         |       | 2     | 0.0%       |
| Frp-topp vil ta mer fra de rike - blir refset           |       | 4     | 0.1%       |
| Frp-topp: Vil avskaffe eiendomsskatten i alle norske by |       | 5     | 0.1%       |
| Frp-topp: Vil innføre eiendomsskatt i alle norske byer. |       | 2     | 0.0%       |
| Helgens konsert                                         |       | 19    | 0.4%       |
| Her er helgens filmer                                   |       | 16    | 0.3%       |
| Her er helgens filmer du bør se                         |       | 10    | 0.2%       |

# r7pad14\_headlinesRan\_5: Randomly chosen article headline nr. 5. Background variable conjunction experiment R7PAD14. Background variable conjunction experiment R7PAD14.

| Value                                                   | Label | Cases | Percentage |
|---------------------------------------------------------|-------|-------|------------|
| Her er helgens filmer du bør unngå                      |       | 18    | 0.4%       |
| Her er vinterens beste smarttelefoner                   |       | 15    | 0.3%       |
| Her er vinterens smarttelefoner                         |       | 14    | 0.3%       |
| Her er vinterens verste smarttelefoner                  |       | 20    | 0.4%       |
| Her går konserten fryktelig galt                        |       | 12    | 0.3%       |
| Her går konserten skikkelig bra                         |       | 15    | 0.3%       |
| Høyre-politiker fordømmes etter Facebook-innlegg: «vi t |       | 4     | 0.1%       |
| Høyre-politiker får kjeft for forslag som vil redusere  |       | 1     | 0.0%       |
| Høyre-politiker får kjeft for forslag som vil øke innte |       | 2     | 0.0%       |
| Høyre-politiker får kritikk etter facebook-status: «Hom |       | 2     | 0.0%       |
| Høyre-politiker får massiv støtte - vil ikke åpne flere |       | 3     | 0.1%       |
| Høyre-politiker får massiv støtte - vil åpne flere olje |       | 1     | 0.0%       |
| Høyre-politiker får pepper for forslag: vil nekte priva |       | 1     | 0.0%       |
| Høyre-politiker får ros etter facebook-status: «Homofil |       | 3     | 0.1%       |
| Høyre-politiker får skryt for forslag som vil redusere  |       | 1     | 0.0%       |
| Høyre-politiker får skryt for forslag som vil øke innte |       | 4     | 0.1%       |

# r7pad14\_headlinesRan\_5: Randomly chosen article headline nr. 5. Background variable conjunction experiment R7PAD14. Background variable conjunction experiment R7PAD14.

| Value                                                   | Label | Cases | Percentage |
|---------------------------------------------------------|-------|-------|------------|
| Høyre-politiker får skryt for forslag: vil nekte privat |       | 2     | 0.0%       |
| Høyre-politiker får skryt for forslag: vil privatisere  |       | 3     | 0.1%       |
| Høyre-politiker hudflettes etter homovennlig lovforslag |       | 2     | 0.0%       |
| Høyre-politiker hudflettes: mener det burde være vanske |       | 3     | 0.1%       |
| Høyre-politiker hudflettes: mener det ikke burde være v |       | 4     | 0.1%       |
| Høyre-politiker hylles ? mener det er bedre med flere k |       | 3     | 0.1%       |
| Høyre-politiker lovprises etter Facebook-innlegg: «vi t |       | 6     | 0.1%       |
| Høyre-politiker lovprises etter homofiendtlig lovforsla |       | 3     | 0.1%       |
| Høyre-politiker lovprises etter homovennlig lovforslag  |       | 4     | 0.1%       |
| Høyre-politiker lovprises: mener det ikke burde være va |       | 1     | 0.0%       |
| Høyre-politiker med Facebook-innlegg: «vi trenger flere |       | 2     | 0.0%       |
| Høyre-politiker med forslag som vil redusere inntektsfo |       | 3     | 0.1%       |
| Høyre-politiker med homovennlig lovforslag              |       | 2     | 0.0%       |
| Høyre-politiker mener alle offentlige aktiviteter ikke  |       | 6     | 0.1%       |
| Høyre-politiker mener alle                              |       | 6     | 0.1%       |

# r7pad14\_headlinesRan\_5: Randomly chosen article headline nr. 5. Background variable conjunction experiment R7PAD14. Background variable conjunction experiment R7PAD14.

| Value                                                   | Label | Cases | Percentage |
|---------------------------------------------------------|-------|-------|------------|
| offentlige aktiviteter kan g                            |       |       |            |
| Høyre-politiker mener det burde være vanskeligere for h |       | 3     | 0.1%       |
| Høyre-politiker mener det er bedre med flere kulturer o |       | 2     | 0.0%       |
| Høyre-politiker mener det er bedre med færre kulturer o |       | 3     | 0.1%       |
| Høyre-politiker mener det ikke burde være vanskeligere  |       | 2     | 0.0%       |
| Høyre-politiker mener flyktninger bør ha samme rett til |       | 8     | 0.2%       |
| Høyre-politiker mener flyktninger ikke bør ha samme ret |       | 4     | 0.1%       |
| Høyre-politiker møter massiv motstand - vil ikke åpne f |       | 1     | 0.0%       |
| Høyre-politiker møter massiv motstand - vil åpne flere  |       | 1     | 0.0%       |
| Høyre-politiker presenterer forslag: vil nekte privatis |       | 2     | 0.0%       |
| Høyre-politiker presenterer forslag: vil privatisere NS |       | 5     | 0.1%       |
| Høyre-politiker på Facebook: «Homofile par MÅ IKKE få l |       | 3     | 0.1%       |
| Høyre-politiker på Facebook: «Homofile par MÅ få like r |       | 1     | 0.0%       |
| Høyre-politiker skjelles ut ? mener det er bedre med fl |       | 2     | 0.0%       |
| Høyre-politiker skjelles ut ?                           |       | 1     | 0.0%       |

# r7pad14\_headlinesRan\_5: Randomly chosen article headline nr. 5. Background variable conjunction experiment R7PAD14. Background variable conjunction experiment R7PAD14.

| Value                                                   | Label | Cases | Percentage |
|---------------------------------------------------------|-------|-------|------------|
| mener det er bedre med fæ                               |       |       |            |
| Høyre-politiker vil ikke åpne flere oljefelt i nord     |       | 1     | 0.0%       |
| Høyre-politiker vil åpne flere oljefelt i nord          |       | 5     | 0.1%       |
| Høyre-profil blir hedret etter twittermelding ? vil åpn |       | 3     | 0.1%       |
| Høyre-profil blir latterliggjort etter twittermelding ? |       | 5     | 0.1%       |
| Høyre-profil i åpent brev: «jeg vil IKKE at flyktinger  |       | 3     | 0.1%       |
| Høyre-profil i åpent brev: «jeg vil at flyktinger skal  |       | 13    | 0.3%       |
| Høyre-profil lanserer forslag om flere privatskoler i N |       | 5     | 0.1%       |
| Høyre-profil lanserer forslag om færre privatskoler i N |       | 1     | 0.0%       |
| Høyre-profil mener at kommersielle skoler bør forbys    |       | 4     | 0.1%       |
| Høyre-profil mener at kommersielle skoler bør tillates  |       | 4     | 0.1%       |
| Høyre-profil møter begeistring - mener at kommersielle  |       | 5     | 0.1%       |
| Høyre-profil møter begeistring for forslag om flere pri |       | 2     | 0.0%       |
| Høyre-profil møter begeistring for forslag om færre pri |       | 5     | 0.1%       |
| Høyre-profil møter proteststorm                         |       | 4     | 0.1%       |

# r7pad14\_headlinesRan\_5: Randomly chosen article headline nr. 5. Background variable conjunction experiment R7PAD14. Background variable conjunction experiment R7PAD14.

| Value                                                   | Label | Cases | Percentage |
|---------------------------------------------------------|-------|-------|------------|
| - mener at kommersielle                                 |       |       |            |
| Høyre-profil møter proteststorm for forslag om flere pr |       | 1     | 0.0%       |
| Høyre-profil møter proteststorm for forslag om færre pr |       | 2     | 0.0%       |
| Høyre-profil på twitter: vil åpne for oljeboring i nord |       | 1     | 0.0%       |
| Høyre-representant refses ? vil sikre at ingen private  |       | 2     | 0.0%       |
| Høyre-representant refses ? vil åpne for at noen privat |       | 3     | 0.1%       |
| Høyre-representant roses ? vil sikre at ingen private s |       | 1     | 0.0%       |
| Høyre-representant roses ? vil åpne for at noen private |       | 2     | 0.0%       |
| Høyre-representant vil sikre at ingen private skoler sk |       | 2     | 0.0%       |
| Høyre-representant vil åpne for at noen private skoler  |       | 3     | 0.1%       |
| Høyre-topp kjemper for oljeboring i Lofoten             |       | 3     | 0.1%       |
| Høyre-topp kjemper for oljeboring i Lofoten - får massi |       | 1     | 0.0%       |
| Høyre-topp kjemper for oljeboring i Lofoten - møter mas |       | 2     | 0.0%       |
| Høyre-topp kjemper mot oljeboring i Lofoten             |       | 6     | 0.1%       |



# r7pad14\_headlinesRan\_5: Randomly chosen article headline nr. 5. Background variable conjunction experiment R7PAD14. Background variable conjunction experiment R7PAD14.

| Value                                                   | Label | Cases | Percentage |
|---------------------------------------------------------|-------|-------|------------|
| Høyre-topp kjemper mot oljeboring i Lofoten - får massi |       | 1     | 0.0%       |
| Høyre-topp kjemper mot oljeboring i Lofoten - møter mas |       | 2     | 0.0%       |
| Høyre-topp mener at skattenivået burde reduseres        |       | 2     | 0.0%       |
| Høyre-topp mener at skattenivået ikke burde reduseres   |       | 1     | 0.0%       |
| Høyre-topp presser på for å gi NAV-penger til Syriske f |       | 3     | 0.1%       |
| Høyre-topp truer med å ta NAV-penger fra Syriske flykti |       | 5     | 0.1%       |
| Høyre-topp vil gi mer til de rike                       |       | 2     | 0.0%       |
| Høyre-topp vil gi mer til de rike - blir roset          |       | 4     | 0.1%       |
| Høyre-topp vil ta mer fra de rike                       |       | 4     | 0.1%       |
| Høyre-topp vil ta mer fra de rike - blir refset         |       | 3     | 0.1%       |
| Høyre-topp vil ta mer fra de rike - blir roset          |       | 5     | 0.1%       |
| Høyre-topp: Vil avskaffe eiendomsskatten i alle norske  |       | 2     | 0.0%       |
| Jubler for Ap-topp: Vil avskaffe eiendomsskatten i alle |       | 1     | 0.0%       |
| Jubler for Ap-topp: Vil innføre eiendomsskatt i alle no |       | 3     | 0.1%       |
| Jubler for Frp-topp: Vil avskaffe eiendomsskatten i all |       | 5     | 0.1%       |

# r7pad14\_headlinesRan\_5: Randomly chosen article headline nr. 5. Background variable conjunction experiment R7PAD14. Background variable conjunction experiment R7PAD14.

| Value                                                   | Label | Cases | Percentage |
|---------------------------------------------------------|-------|-------|------------|
| Jubler for Frp-topp: Vil innføre eiendomsskatt i alle n |       | 2     | 0.0%       |
| Jubler for Høyre-topp: Vil avskaffe eiendomsskatten i a |       | 1     | 0.0%       |
| Jubler for Høyre-topp: Vil innføre eiendomsskatt i alle |       | 3     | 0.1%       |
| Jubler for Krf-topp: Vil avskaffe eiendomsskatten i all |       | 1     | 0.0%       |
| Jubler for Mdg-topp: Vil innføre eiendomsskatt i alle n |       | 3     | 0.1%       |
| Jubler for Rødt-topp: Vil avskaffe eiendomsskatten i al |       | 2     | 0.0%       |
| Jubler for Rødt-topp: Vil innføre eiendomsskatt i alle  |       | 4     | 0.1%       |
| Jubler for Sp-topp: Vil innføre eiendomsskatt i alle no |       | 1     | 0.0%       |
| Jubler for Sv-topp: Vil avskaffe eiendomsskatten i alle |       | 1     | 0.0%       |
| Jubler for Sv-topp: Vil innføre eiendomsskatt i alle no |       | 1     | 0.0%       |
| Jubler for Venstre-topp: Vil avskaffe eiendomsskatten i |       | 2     | 0.0%       |
| Kjendisfesten ble holdt i går                           |       | 23    | 0.5%       |
| Kjendisfesten gikk skikkelig galt                       |       | 13    | 0.3%       |
| Kjendisfesten var en stor suksess                       |       | 17    | 0.4%       |

# r7pad14\_headlinesRan\_5: Randomly chosen article headline nr. 5. Background variable conjunction experiment R7PAD14. Background variable conjunction experiment R7PAD14.

| Value                                                   | Label | Cases | Percentage |
|---------------------------------------------------------|-------|-------|------------|
| Krf-politiker fordømmes etter Facebook-innlegg: «vi tre |       | 2     | 0.0%       |
| Krf-politiker får kjeft for forslag som vil redusere in |       | 1     | 0.0%       |
| Krf-politiker får kritikk etter facebook-status: «Homof |       | 3     | 0.1%       |
| Krf-politiker får massiv støtte - vil ikke åpne flere o |       | 1     | 0.0%       |
| Krf-politiker får massiv støtte - vil åpne flere oljefe |       | 3     | 0.1%       |
| Krf-politiker får pepper for forslag: vil privatisere N |       | 1     | 0.0%       |
| Krf-politiker får ros etter facebook-status: «Homofile  |       | 6     | 0.1%       |
| Krf-politiker får skryt for forslag som vil redusere in |       | 2     | 0.0%       |
| Krf-politiker får skryt for forslag som vil øke inntekt |       | 3     | 0.1%       |
| Krf-politiker får skryt for forslag: vil privatisere NS |       | 1     | 0.0%       |
| Krf-politiker hudflettes etter homofiendtlig lovforslag |       | 2     | 0.0%       |
| Krf-politiker hudflettes etter homovennlig lovforslag   |       | 3     | 0.1%       |
| Krf-politiker hudflettes: mener det burde være vanskel  |       | 3     | 0.1%       |
| Krf-politiker hudflettes: mener det ikke burde være van |       | 1     | 0.0%       |
| Krf-politiker hylles ? mener                            |       | 1     | 0.0%       |

# r7pad14\_headlinesRan\_5: Randomly chosen article headline nr. 5. Background variable conjunction experiment R7PAD14. Background variable conjunction experiment R7PAD14.

| Value                                                   | Label | Cases | Percentage |
|---------------------------------------------------------|-------|-------|------------|
| det er bedre med flere kul                              |       |       |            |
| Krf-politiker hylles ? mener det er bedre med færre kul |       | 1     | 0.0%       |
| Krf-politiker lovprises etter Facebook-innlegg: «vi tre |       | 4     | 0.1%       |
| Krf-politiker lovprises etter homofiendtlig lovforslag  |       | 1     | 0.0%       |
| Krf-politiker lovprises etter homovenlig lovforslag     |       | 1     | 0.0%       |
| Krf-politiker lovprises: mener det burde være vanskelig |       | 1     | 0.0%       |
| Krf-politiker lovprises: mener det ikke burde være vans |       | 4     | 0.1%       |
| Krf-politiker med Facebook-innlegg: «vi trenger flere m |       | 1     | 0.0%       |
| Krf-politiker med Facebook-innlegg: «vi trenger ikke fl |       | 1     | 0.0%       |
| Krf-politiker med forslag som vil øke inntektsforskjell |       | 4     | 0.1%       |
| Krf-politiker med homofiendtlig lovforslag              |       | 2     | 0.0%       |
| Krf-politiker med homovenlig lovforslag                 |       | 1     | 0.0%       |
| Krf-politiker mener alle offentlige aktiviteter ikke ka |       | 4     | 0.1%       |
| Krf-politiker mener alle offentlige aktiviteter kan gjø |       | 4     | 0.1%       |
| Krf-politiker mener det er                              |       | 3     | 0.1%       |

# r7pad14\_headlinesRan\_5: Randomly chosen article headline nr. 5. Background variable conjunction experiment R7PAD14. Background variable conjunction experiment R7PAD14.

| Value                                                    | Label | Cases | Percentage |
|----------------------------------------------------------|-------|-------|------------|
| bedre med flere kulturer og                              |       |       |            |
| Krf-politiker mener det er bedre med færre kulturer og   |       | 2     | 0.0%       |
| Krf-politiker mener flyktninger bør ha samme rett til s  |       | 7     | 0.1%       |
| Krf-politiker mener flyktninger ikke bør ha samme rett   |       | 4     | 0.1%       |
| Krf-politiker møter massiv motstand - vil ikke åpne fle  |       | 1     | 0.0%       |
| Krf-politiker møter massiv motstand - vil åpne flere ol  |       | 2     | 0.0%       |
| Krf-politiker presenterer forslag: vil nekte privatiser  |       | 3     | 0.1%       |
| Krf-politiker presenterer forslag: vil privatisere NSB   |       | 1     | 0.0%       |
| Krf-politiker på Facebook: «Homofile par MÅ IKKE få lik  |       | 1     | 0.0%       |
| Krf-politiker på Facebook: «Homofile par MÅ få like ret  |       | 3     | 0.1%       |
| Krf-politiker skjelles ut ? mener det er bedre med fler  |       | 4     | 0.1%       |
| Krf-politiker skjelles ut ? mener det er bedre med færre |       | 1     | 0.0%       |
| Krf-politiker vil ikke åpne flere oljefelt i nord        |       | 2     | 0.0%       |
| Krf-politiker vil åpne flere oljefelt i nord             |       | 2     | 0.0%       |
| Krf-profil blir hedret etter twittermelding ? vil steng  |       | 1     | 0.0%       |

# r7pad14\_headlinesRan\_5: Randomly chosen article headline nr. 5. Background variable conjunction experiment  
R7PAD14.Background variable conjunction experiment R7PAD14.

| Value                                                    | Label | Cases | Percentage |
|----------------------------------------------------------|-------|-------|------------|
| Krf-profil blir hedret etter twittermelding ? vil åpne   |       | 4     | 0.1%       |
| Krf-profil blir latterliggjort etter twittermelding ? vi |       | 4     | 0.1%       |
| Krf-profil i åpent brev: «jeg vil IKKE at flyktinger sk  |       | 3     | 0.1%       |
| Krf-profil i åpent brev: «jeg vil at flyktinger skal få  |       | 7     | 0.1%       |
| Krf-profil lanserer forslag om flere privatskoler i Nor  |       | 1     | 0.0%       |
| Krf-profil lanserer forslag om færre privatskoler i Nor  |       | 2     | 0.0%       |
| Krf-profil mener at kommersielle skoler bør forbys       |       | 1     | 0.0%       |
| Krf-profil mener at kommersielle skoler bør tillates     |       | 2     | 0.0%       |
| Krf-profil møter begeistring for forslag om flere priva  |       | 2     | 0.0%       |
| Krf-profil møter begeistring for forslag om færre priva  |       | 4     | 0.1%       |
| Krf-profil møter proteststorm - mener at kommersielle s  |       | 6     | 0.1%       |
| Krf-profil møter proteststorm for forslag om flere priv  |       | 1     | 0.0%       |
| Krf-profil møter proteststorm for forslag om færre priv  |       | 1     | 0.0%       |
| Krf-profil på twitter: vil åpne for oljeboring i nord    |       | 1     | 0.0%       |
| Krf-representant refses ? vil sikre                      |       | 3     | 0.1%       |

# r7pad14\_headlinesRan\_5: Randomly chosen article headline nr. 5. Background variable conjunction experiment R7PAD14. Background variable conjunction experiment R7PAD14.

| Value                                                   | Label | Cases | Percentage |
|---------------------------------------------------------|-------|-------|------------|
| at ingen private sk                                     |       |       |            |
| Krf-representant refses ? vil åpne for at noen private  |       | 4     | 0.1%       |
| Krf-representant roses ? vil åpne for at noen private s |       | 1     | 0.0%       |
| Krf-representant vil åpne for at noen private skoler sk |       | 2     | 0.0%       |
| Krf-topp kjemper for oljeboring i Lofoten - får massiv  |       | 2     | 0.0%       |
| Krf-topp kjemper for oljeboring i Lofoten - møter massi |       | 2     | 0.0%       |
| Krf-topp kjemper mot oljeboring i Lofoten               |       | 3     | 0.1%       |
| Krf-topp kjemper mot oljeboring i Lofoten - møter massi |       | 3     | 0.1%       |
| Krf-topp mener at skattenivået burde reduseres          |       | 2     | 0.0%       |
| Krf-topp mener at skattenivået ikke burde reduseres     |       | 3     | 0.1%       |
| Krf-topp presser på for å gi NAV-penger til Syriske fly |       | 9     | 0.2%       |
| Krf-topp truer med å ta NAV-penger fra Syriske flykting |       | 11    | 0.2%       |
| Krf-topp vil gi mer til de rike                         |       | 1     | 0.0%       |
| Krf-topp vil gi mer til de rike - blir refset           |       | 1     | 0.0%       |
| Krf-topp vil gi mer til de rike - blir roset            |       | 3     | 0.1%       |

# r7pad14\_headlinesRan\_5: Randomly chosen article headline nr. 5. Background variable conjunction experiment R7PAD14. Background variable conjunction experiment R7PAD14.

| Value                                                   | Label | Cases | Percentage |
|---------------------------------------------------------|-------|-------|------------|
| Krf-topp vil ta mer fra de rike - blir refset           |       | 1     | 0.0%       |
| Krf-topp vil ta mer fra de rike - blir roset            |       | 4     | 0.1%       |
| Krf-topp: Vil avskaffe eiendomsskatten i alle norske by |       | 2     | 0.0%       |
| Krf-topp: Vil innføre eiendomsskatt i alle norske byer. |       | 1     | 0.0%       |
| Lokal Ap-politiker ? vil hindre at vi tar imot 5000 nye |       | 3     | 0.1%       |
| Lokal Ap-politiker hylles ? vil hindre at vi tar imot 5 |       | 1     | 0.0%       |
| Lokal Ap-politiker hylles ? vil ta imot 5000 nye flyktn |       | 1     | 0.0%       |
| Lokal Ap-politiker skjelles ut ? vil hindre at vi tar i |       | 5     | 0.1%       |
| Lokal Ap-politiker skjelles ut ? vil ta imot 5000 nye f |       | 1     | 0.0%       |
| Lokal Frp-politiker ? vil hindre at vi tar imot 5000 ny |       | 3     | 0.1%       |
| Lokal Frp-politiker ? vil ta imot 5000 nye flyktninger  |       | 2     | 0.0%       |
| Lokal Frp-politiker hylles ? vil hindre at vi tar imot  |       | 2     | 0.0%       |
| Lokal Frp-politiker hylles ? vil ta imot 5000 nye flykt |       | 2     | 0.0%       |
| Lokal Frp-politiker skjelles ut ? vil hindre at vi tar  |       | 3     | 0.1%       |
| Lokal Frp-politiker skjelles ut ? vil ta imot 5000 nye  |       | 3     | 0.1%       |



# r7pad14\_headlinesRan\_5: Randomly chosen article headline nr. 5. Background variable conjunction experiment R7PAD14. Background variable conjunction experiment R7PAD14.

| Value                                                   | Label | Cases | Percentage |
|---------------------------------------------------------|-------|-------|------------|
| Lokal Høyre-politiker ? vil ta imot 5000 nye flyktninge |       | 1     | 0.0%       |
| Lokal Høyre-politiker hylles ? vil hindre at vi tar imo |       | 1     | 0.0%       |
| Lokal Høyre-politiker hylles ? vil ta imot 5000 nye fly |       | 3     | 0.1%       |
| Lokal Høyre-politiker skjelles ut ? vil hindre at vi ta |       | 3     | 0.1%       |
| Lokal Høyre-politiker skjelles ut ? vil ta imot 5000 ny |       | 4     | 0.1%       |
| Lokal Krf-politiker ? vil hindre at vi tar imot 5000 ny |       | 2     | 0.0%       |
| Lokal Krf-politiker ? vil ta imot 5000 nye flyktninger  |       | 1     | 0.0%       |
| Lokal Krf-politiker hylles ? vil hindre at vi tar imot  |       | 3     | 0.1%       |
| Lokal Krf-politiker skjelles ut ? vil ta imot 5000 nye  |       | 1     | 0.0%       |
| Lokal Mdg-politiker ? vil hindre at vi tar imot 5000 ny |       | 2     | 0.0%       |
| Lokal Mdg-politiker ? vil ta imot 5000 nye flyktninger  |       | 3     | 0.1%       |
| Lokal Mdg-politiker hylles ? vil hindre at vi tar imot  |       | 2     | 0.0%       |
| Lokal Mdg-politiker hylles ? vil ta imot 5000 nye flykt |       | 1     | 0.0%       |
| Lokal Mdg-politiker skjelles ut ? vil hindre at vi tar  |       | 1     | 0.0%       |
| Lokal Mdg-politiker skjelles                            |       | 1     | 0.0%       |

# r7pad14\_headlinesRan\_5: Randomly chosen article headline nr. 5. Background variable conjunction experiment R7PAD14. Background variable conjunction experiment R7PAD14.

| Value                                                   | Label | Cases | Percentage |
|---------------------------------------------------------|-------|-------|------------|
| ut ? vil ta imot 5000 nye                               |       |       |            |
| Lokal Rødt-politiker ? vil hindre at vi tar imot 5000 n |       | 2     | 0.0%       |
| Lokal Rødt-politiker ? vil ta imot 5000 nye flyktninger |       | 3     | 0.1%       |
| Lokal Rødt-politiker hylles ? vil ta imot 5000 nye flyk |       | 2     | 0.0%       |
| Lokal Rødt-politiker skjelles ut ? vil ta imot 5000 nye |       | 3     | 0.1%       |
| Lokal Sp-politiker ? vil hindre at vi tar imot 5000 nye |       | 1     | 0.0%       |
| Lokal Sp-politiker ? vil ta imot 5000 nye flyktninger   |       | 3     | 0.1%       |
| Lokal Sp-politiker hylles ? vil hindre at vi tar imot 5 |       | 1     | 0.0%       |
| Lokal Sp-politiker hylles ? vil ta imot 5000 nye flyktn |       | 5     | 0.1%       |
| Lokal Sp-politiker skjelles ut ? vil hindre at vi tar i |       | 2     | 0.0%       |
| Lokal Sp-politiker skjelles ut ? vil ta imot 5000 nye f |       | 1     | 0.0%       |
| Lokal Sv-politiker ? vil hindre at vi tar imot 5000 nye |       | 3     | 0.1%       |
| Lokal Sv-politiker ? vil ta imot 5000 nye flyktninger   |       | 4     | 0.1%       |
| Lokal Sv-politiker hylles ? vil hindre at vi tar imot 5 |       | 1     | 0.0%       |
| Lokal Sv-politiker hylles ? vil ta imot 5000 nye flyktn |       | 2     | 0.0%       |

# r7pad14\_headlinesRan\_5: Randomly chosen article headline nr. 5. Background variable conjunction experiment R7PAD14. Background variable conjunction experiment R7PAD14.

| Value                                                   | Label | Cases | Percentage |
|---------------------------------------------------------|-------|-------|------------|
| Lokal Sv-politiker skjelles ut ? vil hindre at vi tar i |       | 2     | 0.0%       |
| Lokal Venstre-politiker ? vil hindre at vi tar imot 500 |       | 2     | 0.0%       |
| Lokal Venstre-politiker ? vil ta imot 5000 nye flyktnin |       | 3     | 0.1%       |
| Lokal Venstre-politiker hylles ? vil hindre at vi tar i |       | 4     | 0.1%       |
| Lokal Venstre-politiker skjelles ut ? vil hindre at vi  |       | 3     | 0.1%       |
| Lokal Venstre-politiker skjelles ut ? vil ta imot 5000  |       | 3     | 0.1%       |
| Mareritthistoriene om høstens treningstrend             |       | 13    | 0.3%       |
| Mdg-politiker fordømmes etter Facebook-innlegg: «vi tre |       | 6     | 0.1%       |
| Mdg-politiker får kjeft for forslag som vil redusere in |       | 3     | 0.1%       |
| Mdg-politiker får kjeft for forslag som vil øke inntekt |       | 2     | 0.0%       |
| Mdg-politiker får kritikk etter facebook-status: «Homof |       | 4     | 0.1%       |
| Mdg-politiker får massiv støtte - vil åpne flere oljefe |       | 5     | 0.1%       |
| Mdg-politiker får pepper for forslag: vil privatisere N |       | 1     | 0.0%       |
| Mdg-politiker får ros etter facebook-status: «Homofile  |       | 1     | 0.0%       |
| Mdg-politiker får skryt for                             |       | 3     | 0.1%       |

# r7pad14\_headlinesRan\_5: Randomly chosen article headline nr. 5. Background variable conjunction experiment R7PAD14. Background variable conjunction experiment R7PAD14.

| Value                                                    | Label | Cases | Percentage |
|----------------------------------------------------------|-------|-------|------------|
| forslag: vil privatisere NS                              |       |       |            |
| Mdg-politiker hudflettes etter homofiendtlig lovforslag  |       | 1     | 0.0%       |
| Mdg-politiker hudflettes etter homovennlig lovforslag    |       | 4     | 0.1%       |
| Mdg-politiker hudflettes: mener det burde være vanskelig |       | 1     | 0.0%       |
| Mdg-politiker hudflettes: mener det ikke burde være van  |       | 1     | 0.0%       |
| Mdg-politiker hylles ? mener det er bedre med flere kul  |       | 2     | 0.0%       |
| Mdg-politiker hylles ? mener det er bedre med færre kul  |       | 3     | 0.1%       |
| Mdg-politiker lovprises etter Facebook-innlegg: «vi tre  |       | 1     | 0.0%       |
| Mdg-politiker lovprises etter homofiendtlig lovforslag   |       | 1     | 0.0%       |
| Mdg-politiker lovprises: mener det burde være vanskelig  |       | 1     | 0.0%       |
| Mdg-politiker lovprises: mener det ikke burde være vans  |       | 3     | 0.1%       |
| Mdg-politiker med Facebook-innlegg: «vi trenger flere m  |       | 2     | 0.0%       |
| Mdg-politiker med homofiendtlig lovforslag               |       | 1     | 0.0%       |
| Mdg-politiker med homovennlig lovforslag                 |       | 2     | 0.0%       |
| Mdg-politiker mener alle offentlige                      |       | 3     | 0.1%       |

# r7pad14\_headlinesRan\_5: Randomly chosen article headline nr. 5. Background variable conjunction experiment R7PAD14. Background variable conjunction experiment R7PAD14.

| Value                                                    | Label | Cases | Percentage |
|----------------------------------------------------------|-------|-------|------------|
| aktiviteter ikke ka                                      |       |       |            |
| Mdg-politiker mener alle offentlige aktiviteter kan gjø  |       | 5     | 0.1%       |
| Mdg-politiker mener det burde være vanskeligere for hom  |       | 5     | 0.1%       |
| Mdg-politiker mener det er bedre med flere kulturer og   |       | 3     | 0.1%       |
| Mdg-politiker mener det er bedre med færre kulturer og   |       | 3     | 0.1%       |
| Mdg-politiker mener flyktninger bør ha samme rett til s  |       | 3     | 0.1%       |
| Mdg-politiker mener flyktninger ikke bør ha samme rett   |       | 9     | 0.2%       |
| Mdg-politiker møter massiv motstand - vil ikke åpne fle  |       | 2     | 0.0%       |
| Mdg-politiker møter massiv motstand - vil åpne flere ol  |       | 2     | 0.0%       |
| Mdg-politiker presenterer forslag: vil nekte privatiser  |       | 1     | 0.0%       |
| Mdg-politiker på Facebook: «Homofile par MÅ IKKE få lik  |       | 2     | 0.0%       |
| Mdg-politiker skjelles ut ? mener det er bedre med fler  |       | 2     | 0.0%       |
| Mdg-politiker skjelles ut ? mener det er bedre med færre |       | 1     | 0.0%       |
| Mdg-politiker vil ikke åpne flere oljefelt i nord        |       | 2     | 0.0%       |
| Mdg-profil blir hedret etter                             |       | 1     | 0.0%       |

**# r7pad14\_headlinesRan\_5: Randomly chosen article headline nr. 5. Background variable conjunction experiment R7PAD14. Background variable conjunction experiment R7PAD14.**

| Value                                                    | Label | Cases | Percentage |
|----------------------------------------------------------|-------|-------|------------|
| twittermelding ? vil steng                               |       |       |            |
| Mdg-profil blir hedret etter twittermelding ? vil åpne   |       | 3     | 0.1%       |
| Mdg-profil blir latterliggjort etter twittermelding ? vi |       | 7     | 0.1%       |
| Mdg-profil i åpent brev: «jeg vil IKKE at flyktinger sk  |       | 8     | 0.2%       |
| Mdg-profil i åpent brev: «jeg vil at flyktinger skal få  |       | 6     | 0.1%       |
| Mdg-profil lanserer forslag om flere privatskoler i Nor  |       | 1     | 0.0%       |
| Mdg-profil lanserer forslag om færre privatskoler i Nor  |       | 3     | 0.1%       |
| Mdg-profil mener at kommersielle skoler bør tillates     |       | 1     | 0.0%       |
| Mdg-profil møter begeistring - mener at kommersielle sk  |       | 2     | 0.0%       |
| Mdg-profil møter begeistring for forslag om flere priva  |       | 1     | 0.0%       |
| Mdg-profil møter begeistring for forslag om færre priva  |       | 3     | 0.1%       |
| Mdg-profil møter proteststorm - mener at kommersielle s  |       | 6     | 0.1%       |
| Mdg-profil møter proteststorm for forslag om flere priv  |       | 3     | 0.1%       |

# r7pad14\_headlinesRan\_5: Randomly chosen article headline nr. 5. Background variable conjunction experiment R7PAD14. Background variable conjunction experiment R7PAD14.

| Value                                                   | Label | Cases | Percentage |
|---------------------------------------------------------|-------|-------|------------|
| Mdg-profil møter proteststorm for forslag om færre priv |       | 5     | 0.1%       |
| Mdg-profil på twitter: vil stenge for oljeboring i nord |       | 1     | 0.0%       |
| Mdg-profil på twitter: vil åpne for oljeboring i nord   |       | 1     | 0.0%       |
| Mdg-representant refses ? vil sikre at ingen private sk |       | 2     | 0.0%       |
| Mdg-representant refses ? vil åpne for at noen private  |       | 1     | 0.0%       |
| Mdg-representant roses ? vil sikre at ingen private sko |       | 1     | 0.0%       |
| Mdg-representant roses ? vil åpne for at noen private s |       | 4     | 0.1%       |
| Mdg-representant vil sikre at ingen private skoler skal |       | 2     | 0.0%       |
| Mdg-representant vil åpne for at noen private skoler sk |       | 2     | 0.0%       |
| Mdg-topp kjemper for oljeboring i Lofoten               |       | 1     | 0.0%       |
| Mdg-topp kjemper for oljeboring i Lofoten - får massiv  |       | 2     | 0.0%       |
| Mdg-topp kjemper for oljeboring i Lofoten - møter massi |       | 2     | 0.0%       |
| Mdg-topp kjemper mot                                    |       | 2     | 0.0%       |

# r7pad14\_headlinesRan\_5: Randomly chosen article headline nr. 5. Background variable conjunction experiment R7PAD14. Background variable conjunction experiment R7PAD14.

| Value                                                   | Label | Cases | Percentage |
|---------------------------------------------------------|-------|-------|------------|
| oljeboring i Lofoten                                    |       |       |            |
| Mdg-topp kjemper mot oljeboring i Lofoten - får massiv  |       | 1     | 0.0%       |
| Mdg-topp kjemper mot oljeboring i Lofoten - møter massi |       | 4     | 0.1%       |
| Mdg-topp mener at skattenivået burde reduseres          |       | 1     | 0.0%       |
| Mdg-topp mener at skattenivået ikke burde reduseres     |       | 3     | 0.1%       |
| Mdg-topp presser på for å gi NAV-penger til Syriske fly |       | 6     | 0.1%       |
| Mdg-topp truer med å ta NAV-penger fra Syriske flykting |       | 9     | 0.2%       |
| Mdg-topp vil gi mer til de rike                         |       | 3     | 0.1%       |
| Mdg-topp vil gi mer til de rike - blir refset           |       | 3     | 0.1%       |
| Mdg-topp vil gi mer til de rike - blir roset            |       | 4     | 0.1%       |
| Mdg-topp vil ta mer fra de rike                         |       | 2     | 0.0%       |
| Mdg-topp vil ta mer fra de rike - blir refset           |       | 1     | 0.0%       |
| Mdg-topp vil ta mer fra de rike - blir roset            |       | 1     | 0.0%       |
| Mdg-topp: Vil avskaffe eiendomsskatten i alle norske by |       | 3     | 0.1%       |
| Norges store sangstjerne får refs i fersk anmeldelse    |       | 11    | 0.2%       |
| Norges store sangstjerne får ros i fersk anmeldelse     |       | 13    | 0.3%       |



# r7pad14\_headlinesRan\_5: Randomly chosen article headline nr. 5. Background variable conjunction experiment R7PAD14. Background variable conjunction experiment R7PAD14.

| Value                                                   | Label | Cases | Percentage |
|---------------------------------------------------------|-------|-------|------------|
| Norges store sangstjerne i fersk anmeldelse             |       | 13    | 0.3%       |
| Politiker fra Ap vil senke formueskatten                |       | 1     | 0.0%       |
| Politiker fra Ap vil senke formueskatten, blir roset    |       | 2     | 0.0%       |
| Politiker fra Ap vil senke formueskatten, mottar sterk  |       | 4     | 0.1%       |
| Politiker fra Ap vil øke formueskatten                  |       | 3     | 0.1%       |
| Politiker fra Ap vil øke formueskatten, blir roset      |       | 1     | 0.0%       |
| Politiker fra Ap vil øke formueskatten, mottar sterk kr |       | 2     | 0.0%       |
| Politiker fra Frp vil senke formueskatten, blir roset   |       | 3     | 0.1%       |
| Politiker fra Frp vil senke formueskatten, mottar sterk |       | 4     | 0.1%       |
| Politiker fra Frp vil øke formueskatten                 |       | 2     | 0.0%       |
| Politiker fra Frp vil øke formueskatten, blir roset     |       | 5     | 0.1%       |
| Politiker fra Frp vil øke formueskatten, mottar sterk k |       | 1     | 0.0%       |
| Politiker fra Høyre vil senke formueskatten             |       | 1     | 0.0%       |
| Politiker fra Høyre vil senke formueskatten, blir roset |       | 3     | 0.1%       |
| Politiker fra Høyre vil senke formueskatten, mottar ste |       | 3     | 0.1%       |
| Politiker fra Høyre vil øke formueskatten               |       | 3     | 0.1%       |

# r7pad14\_headlinesRan\_5: Randomly chosen article headline nr. 5. Background variable conjunction experiment R7PAD14. Background variable conjunction experiment R7PAD14.

| Value                                                   | Label | Cases | Percentage |
|---------------------------------------------------------|-------|-------|------------|
| Politiker fra Høyre vil øke formueskatten, blir roset   |       | 2     | 0.0%       |
| Politiker fra Høyre vil øke formueskatten, mottar sterk |       | 1     | 0.0%       |
| Politiker fra Krf vil senke formueskatten               |       | 1     | 0.0%       |
| Politiker fra Krf vil senke formueskatten, mottar sterk |       | 5     | 0.1%       |
| Politiker fra Krf vil øke formueskatten                 |       | 4     | 0.1%       |
| Politiker fra Krf vil øke formueskatten, blir roset     |       | 3     | 0.1%       |
| Politiker fra Krf vil øke formueskatten, mottar sterk k |       | 2     | 0.0%       |
| Politiker fra Mdg vil senke formueskatten, blir roset   |       | 1     | 0.0%       |
| Politiker fra Mdg vil senke formueskatten, mottar sterk |       | 2     | 0.0%       |
| Politiker fra Mdg vil øke formueskatten, blir roset     |       | 2     | 0.0%       |
| Politiker fra Rødt vil senke formueskatten              |       | 1     | 0.0%       |
| Politiker fra Rødt vil senke formueskatten, blir roset  |       | 4     | 0.1%       |
| Politiker fra Rødt vil senke formueskatten, mottar ster |       | 1     | 0.0%       |
| Politiker fra Rødt vil øke formueskatten                |       | 1     | 0.0%       |
| Politiker fra Rødt vil øke formueskatten, blir roset    |       | 1     | 0.0%       |
| Politiker fra Rødt vil øke                              |       | 3     | 0.1%       |

# r7pad14\_headlinesRan\_5: Randomly chosen article headline nr. 5. Background variable conjunction experiment R7PAD14. Background variable conjunction experiment R7PAD14.

| Value                                                   | Label | Cases | Percentage |
|---------------------------------------------------------|-------|-------|------------|
| formueskatten, mottar sterk                             |       |       |            |
| Politiker fra Sp vil senke formueskatten                |       | 4     | 0.1%       |
| Politiker fra Sp vil senke formueskatten, blir roset    |       | 3     | 0.1%       |
| Politiker fra Sp vil senke formueskatten, mottar sterk  |       | 1     | 0.0%       |
| Politiker fra Sp vil øke formueskatten                  |       | 1     | 0.0%       |
| Politiker fra Sp vil øke formueskatten, mottar sterk kr |       | 3     | 0.1%       |
| Politiker fra Sv vil senke formueskatten                |       | 4     | 0.1%       |
| Politiker fra Sv vil senke formueskatten, mottar sterk  |       | 2     | 0.0%       |
| Politiker fra Sv vil øke formueskatten                  |       | 1     | 0.0%       |
| Politiker fra Sv vil øke formueskatten, blir roset      |       | 3     | 0.1%       |
| Politiker fra Sv vil øke formueskatten, mottar sterk kr |       | 1     | 0.0%       |
| Politiker fra Venstre vil senke formueskatten           |       | 1     | 0.0%       |
| Politiker fra Venstre vil senke formueskatten, mottar s |       | 2     | 0.0%       |
| Politiker fra Venstre vil øke formueskatten             |       | 3     | 0.1%       |
| Politiker fra Venstre vil øke formueskatten, blir roset |       | 2     | 0.0%       |
| Politiker fra Venstre vil øke formueskatten, mottar ste |       | 2     | 0.0%       |

# r7pad14\_headlinesRan\_5: Randomly chosen article headline nr. 5. Background variable conjunction experiment  
R7PAD14.Background variable conjunction experiment R7PAD14.

| Value                                                            | Label | Cases | Percentage |
|------------------------------------------------------------------|-------|-------|------------|
| Refser forslag<br>fra Ap-topp<br>som vil redusere<br>lønnsforskj |       | 5     | 0.1%       |
| Refser forslag<br>fra Frp-topp<br>som vil redusere<br>lønnsforsk |       | 2     | 0.0%       |
| Refser forslag<br>fra Frp-topp<br>som vil øke<br>lønnsforskjelle |       | 2     | 0.0%       |
| Refser forslag<br>fra Høyre-topp<br>som vil redusere<br>lønnsfor |       | 2     | 0.0%       |
| Refser forslag<br>fra Høyre-topp<br>som vil øke<br>lønnsforskjel |       | 3     | 0.1%       |
| Refser forslag<br>fra Krf-topp<br>som vil redusere<br>lønnsforsk |       | 3     | 0.1%       |
| Refser forslag<br>fra Krf-topp<br>som vil øke<br>lønnsforskjelle |       | 2     | 0.0%       |
| Refser forslag<br>fra Mdg-topp<br>som vil redusere<br>lønnsforsk |       | 4     | 0.1%       |
| Refser forslag<br>fra Rødt-topp<br>som vil redusere<br>lønnsfors |       | 2     | 0.0%       |
| Refser forslag<br>fra Rødt-topp<br>som vil øke<br>lønnsforskjell |       | 3     | 0.1%       |
| Refser forslag<br>fra Sp-topp som<br>vil redusere<br>lønnsforskj |       | 2     | 0.0%       |
| Refser forslag<br>fra Sp-topp<br>som vil øke<br>lønnsforskjeller |       | 6     | 0.1%       |
| Refser forslag<br>fra Sv-topp som<br>vil redusere<br>lønnsforskj |       | 5     | 0.1%       |
| Refser forslag<br>fra Sv-topp<br>som vil øke<br>lønnsforskjeller |       | 4     | 0.1%       |
| Refser forslag<br>fra Venstre-topp                               |       | 1     | 0.0%       |

# r7pad14\_headlinesRan\_5: Randomly chosen article headline nr. 5. Background variable conjunction experiment R7PAD14. Background variable conjunction experiment R7PAD14.

| Value                                                   | Label | Cases | Percentage |
|---------------------------------------------------------|-------|-------|------------|
| som vil redusere lønnsf                                 |       |       |            |
| Roser forslag fra Venstre-topp som vil øke lønnsforskj  |       | 2     | 0.0%       |
| Roser forslag fra Ap-topp som vil redusere lønnsforskje |       | 1     | 0.0%       |
| Roser forslag fra Ap-topp som vil øke lønnsforskjeller  |       | 3     | 0.1%       |
| Roser forslag fra Frp-topp som vil redusere lønnsforskj |       | 2     | 0.0%       |
| Roser forslag fra Frp-topp som vil øke lønnsforskjeller |       | 3     | 0.1%       |
| Roser forslag fra Høyre-topp som vil redusere lønnsfors |       | 2     | 0.0%       |
| Roser forslag fra Høyre-topp som vil øke lønnsforskjell |       | 3     | 0.1%       |
| Roser forslag fra Krf-topp som vil redusere lønnsforskj |       | 2     | 0.0%       |
| Roser forslag fra Mdg-topp som vil redusere lønnsforskj |       | 3     | 0.1%       |
| Roser forslag fra Mdg-topp som vil øke lønnsforskjeller |       | 1     | 0.0%       |
| Roser forslag fra Rødt-topp som vil redusere lønnsforsk |       | 2     | 0.0%       |
| Roser forslag fra Rødt-topp som vil øke lønnsforskjelle |       | 1     | 0.0%       |
| Roser forslag fra Sp-topp som vil redusere lønnsforskje |       | 2     | 0.0%       |
| Roser forslag fra Sp-topp som vil øke lønnsforskjeller  |       | 3     | 0.1%       |

# r7pad14\_headlinesRan\_5: Randomly chosen article headline nr. 5. Background variable conjunction experiment R7PAD14. Background variable conjunction experiment R7PAD14.

| Value                                                   | Label | Cases | Percentage |
|---------------------------------------------------------|-------|-------|------------|
| Roser forslag fra Sv-topp som vil redusere lønnsforskje |       | 2     | 0.0%       |
| Roser forslag fra Sv-topp som vil øke lønnsforskjeller  |       | 3     | 0.1%       |
| Roser forslag fra Venstre-topp som vil redusere lønnsfo |       | 1     | 0.0%       |
| Roser forslag fra Venstre-topp som vil øke lønnsforskje |       | 1     | 0.0%       |
| Rødt-politiker fordømmes etter Facebook-innlegg: «vi tr |       | 2     | 0.0%       |
| Rødt-politiker får kjeft for forslag som vil øke inntek |       | 2     | 0.0%       |
| Rødt-politiker får kritikk etter facebook-status: «Homo |       | 3     | 0.1%       |
| Rødt-politiker får massiv støtte - vil ikke åpne flere  |       | 1     | 0.0%       |
| Rødt-politiker får massiv støtte - vil åpne flere oljef |       | 3     | 0.1%       |
| Rødt-politiker får pepper for forslag: vil nekte privat |       | 2     | 0.0%       |
| Rødt-politiker får pepper for forslag: vil privatisere  |       | 4     | 0.1%       |
| Rødt-politiker får ros etter facebook-status: «Homofile |       | 2     | 0.0%       |
| Rødt-politiker får skryt for forslag: vil nekte privati |       | 3     | 0.1%       |
| Rødt-politiker hudflettes etter homofiendtlig lovforsla |       | 2     | 0.0%       |
| Rødt-politiker hudflettes etter                         |       | 1     | 0.0%       |

# r7pad14\_headlinesRan\_5: Randomly chosen article headline nr. 5. Background variable conjunction experiment R7PAD14. Background variable conjunction experiment R7PAD14.

| Value                                                             | Label | Cases | Percentage |
|-------------------------------------------------------------------|-------|-------|------------|
| homovennlig<br>lovforslag                                         |       |       |            |
| Rødt-politiker<br>hudflettes:<br>mener det burde<br>være vanskel  |       | 1     | 0.0%       |
| Rødt-politiker<br>hudflettes:<br>mener det ikke<br>burde være va  |       | 3     | 0.1%       |
| Rødt-politiker<br>hylles ? mener<br>det er bedre med<br>flere ku  |       | 2     | 0.0%       |
| Rødt-politiker<br>hylles ? mener<br>det er bedre med<br>færre ku  |       | 4     | 0.1%       |
| Rødt-politiker<br>lovprises etter<br>Facebook-<br>innlegg: «vi tr |       | 2     | 0.0%       |
| Rødt-politiker<br>lovprises etter<br>homofiendtlig<br>lovforslag  |       | 2     | 0.0%       |
| Rødt-politiker<br>lovprises etter<br>homovennlig<br>lovforslag    |       | 3     | 0.1%       |
| Rødt-politiker<br>lovprises: mener<br>det burde være<br>vanskeli  |       | 6     | 0.1%       |
| Rødt-politiker<br>lovprises: mener<br>det ikke burde<br>være van  |       | 5     | 0.1%       |
| Rødt-politiker<br>med Facebook-<br>innlegg: «vi<br>trenger flere  |       | 1     | 0.0%       |
| Rødt-politiker<br>med Facebook-<br>innlegg: «vi<br>trenger ikke f |       | 2     | 0.0%       |
| Rødt-politiker<br>med forslag<br>som vil redusere<br>inntektsfor  |       | 1     | 0.0%       |
| Rødt-politiker<br>med forslag<br>som vil øke<br>inntektsforskjel  |       | 2     | 0.0%       |
| Rødt-<br>politiker med<br>homofiendtlig<br>lovforslag             |       | 1     | 0.0%       |

# r7pad14\_headlinesRan\_5: Randomly chosen article headline nr. 5. Background variable conjunction experiment R7PAD14. Background variable conjunction experiment R7PAD14.

| Value                                                     | Label | Cases | Percentage |
|-----------------------------------------------------------|-------|-------|------------|
| Rødt-politiker mener alle offentlige aktiviteter ikke k   |       | 4     | 0.1%       |
| Rødt-politiker mener alle offentlige aktiviteter kan gj   |       | 8     | 0.2%       |
| Rødt-politiker mener det burde være vanskeligere for ho   |       | 4     | 0.1%       |
| Rødt-politiker mener det er bedre med færre kulturer og   |       | 1     | 0.0%       |
| Rødt-politiker mener det ikke burde være vanskeligere f   |       | 2     | 0.0%       |
| Rødt-politiker mener flyktninger bør ha samme rett til    |       | 5     | 0.1%       |
| Rødt-politiker mener flyktninger ikke bør ha samme rett   |       | 6     | 0.1%       |
| Rødt-politiker møter massiv motstand - vil åpne flere o   |       | 2     | 0.0%       |
| Rødt-politiker presenterer forslag: vil nekte privatisere |       | 6     | 0.1%       |
| Rødt-politiker presenterer forslag: vil privatisere NSB   |       | 3     | 0.1%       |
| Rødt-politiker på Facebook: «Homofile par MÅ få like re   |       | 5     | 0.1%       |
| Rødt-politiker skjelles ut ? mener det er bedre med fle   |       | 2     | 0.0%       |
| Rødt-politiker skjelles ut ? mener det er bedre med fær   |       | 3     | 0.1%       |
| Rødt-politiker vil åpne flere oljefelt i nord             |       | 1     | 0.0%       |



# r7pad14\_headlinesRan\_5: Randomly chosen article headline nr. 5. Background variable conjunction experiment R7PAD14. Background variable conjunction experiment R7PAD14.

| Value                                                    | Label | Cases | Percentage |
|----------------------------------------------------------|-------|-------|------------|
| Rødt-profil blir hedret etter twittermelding ? vil sten  |       | 1     | 0.0%       |
| Rødt-profil blir hedret etter twittermelding ? vil åpne  |       | 1     | 0.0%       |
| Rødt-profil blir latterliggjort etter twittermelding ? v |       | 5     | 0.1%       |
| Rødt-profil i åpent brev: «jeg vil IKKE at flyktinger s  |       | 9     | 0.2%       |
| Rødt-profil i åpent brev: «jeg vil at flyktinger skal f  |       | 6     | 0.1%       |
| Rødt-profil lanserer forslag om flere privatskoler i No  |       | 2     | 0.0%       |
| Rødt-profil lanserer forslag om færre privatskoler i No  |       | 1     | 0.0%       |
| Rødt-profil mener at kommersielle skoler bør forbys      |       | 1     | 0.0%       |
| Rødt-profil mener at kommersielle skoler bør tillates    |       | 5     | 0.1%       |
| Rødt-profil møter begeistring - mener at kommersielle s  |       | 1     | 0.0%       |
| Rødt-profil møter begeistring for forslag om flere priv  |       | 2     | 0.0%       |
| Rødt-profil møter begeistring for forslag om færre priv  |       | 1     | 0.0%       |
| Rødt-profil møter proteststorm - mener at kommersielle   |       | 5     | 0.1%       |
| Rødt-profil møter                                        |       | 1     | 0.0%       |

# r7pad14\_headlinesRan\_5: Randomly chosen article headline nr. 5. Background variable conjunction experiment R7PAD14. Background variable conjunction experiment R7PAD14.

| Value                                                   | Label | Cases | Percentage |
|---------------------------------------------------------|-------|-------|------------|
| proteststorm for forslag om flere pri                   |       |       |            |
| Rødt-profil møter proteststorm for forslag om færre pri |       | 6     | 0.1%       |
| Rødt-profil på twitter: vil stenge for oljeboring i nor |       | 1     | 0.0%       |
| Rødt-profil på twitter: vil åpne for oljeboring i nord  |       | 2     | 0.0%       |
| Rødt-representant refses ? vil sikre at ingen private s |       | 4     | 0.1%       |
| Rødt-representant refses ? vil åpne for at noen private |       | 7     | 0.1%       |
| Rødt-representant roses ? vil åpne for at noen private  |       | 1     | 0.0%       |
| Rødt-representant vil sikre at ingen private skoler ska |       | 3     | 0.1%       |
| Rødt-representant vil åpne for at noen private skoler s |       | 1     | 0.0%       |
| Rødt-topp kjemper for oljeboring i Lofoten              |       | 2     | 0.0%       |
| Rødt-topp kjemper for oljeboring i Lofoten - får massiv |       | 4     | 0.1%       |
| Rødt-topp kjemper for oljeboring i Lofoten - møter mass |       | 3     | 0.1%       |
| Rødt-topp kjemper mot oljeboring i Lofoten              |       | 3     | 0.1%       |
| Rødt-topp kjemper mot                                   |       | 2     | 0.0%       |

# r7pad14\_headlinesRan\_5: Randomly chosen article headline nr. 5. Background variable conjunction experiment R7PAD14. Background variable conjunction experiment R7PAD14.

| Value                                                   | Label | Cases | Percentage |
|---------------------------------------------------------|-------|-------|------------|
| oljeboring i Lofoten - får massiv                       |       |       |            |
| Rødt-topp mener at skattenivået burde reduseres         |       | 3     | 0.1%       |
| Rødt-topp mener at skattenivået ikke burde reduseres    |       | 4     | 0.1%       |
| Rødt-topp presser på for å gi NAV-penger til Syriske fl |       | 1     | 0.0%       |
| Rødt-topp truer med å ta NAV-penger fra Syriske flyktin |       | 6     | 0.1%       |
| Rødt-topp vil gi mer til de rike                        |       | 4     | 0.1%       |
| Rødt-topp vil gi mer til de rike - blir refset          |       | 4     | 0.1%       |
| Rødt-topp vil ta mer fra de rike                        |       | 1     | 0.0%       |
| Rødt-topp vil ta mer fra de rike - blir refset          |       | 1     | 0.0%       |
| Rødt-topp vil ta mer fra de rike - blir roset           |       | 3     | 0.1%       |
| Rødt-topp: Vil avskaffe eiendomsskatten i alle norske b |       | 4     | 0.1%       |
| Rødt-topp: Vil innføre eiendomsskatt i alle norske byer |       | 1     | 0.0%       |
| Sp-politiker fordømmes etter Facebook-innlegg: «vi tren |       | 2     | 0.0%       |
| Sp-politiker får kjeft for forslag som vil redusere inn |       | 1     | 0.0%       |
| Sp-politiker får kjeft for forslag som vil øke inntekts |       | 1     | 0.0%       |
| Sp-politiker får kritikk etter facebook-status: «Homofi |       | 7     | 0.1%       |
| Sp-politiker får massiv støtte                          |       | 1     | 0.0%       |

# r7pad14\_headlinesRan\_5: Randomly chosen article headline nr. 5. Background variable conjunction experiment R7PAD14. Background variable conjunction experiment R7PAD14.

| Value                                                   | Label | Cases | Percentage |
|---------------------------------------------------------|-------|-------|------------|
| - vil ikke åpne flere ol                                |       |       |            |
| Sp-politiker får massiv støtte - vil åpne flere oljefel |       | 4     | 0.1%       |
| Sp-politiker får pepper for forslag: vil nekte privatis |       | 1     | 0.0%       |
| Sp-politiker får pepper for forslag: vil privatisere NS |       | 3     | 0.1%       |
| Sp-politiker får ros etter facebook-status: «Homofile p |       | 8     | 0.2%       |
| Sp-politiker får skryt for forslag som vil øke inntekts |       | 3     | 0.1%       |
| Sp-politiker får skryt for forslag: vil nekte privatis  |       | 4     | 0.1%       |
| Sp-politiker får skryt for forslag: vil privatisere NSB |       | 2     | 0.0%       |
| Sp-politiker hudflettes etter homovennlig lovforslag    |       | 1     | 0.0%       |
| Sp-politiker hudflettes: mener det burde være vanskelig |       | 3     | 0.1%       |
| Sp-politiker hudflettes: mener det ikke burde være vans |       | 6     | 0.1%       |
| Sp-politiker hylles ? mener det er bedre med færre kult |       | 3     | 0.1%       |
| Sp-politiker lovprises etter Facebook-innlegg: «vi tren |       | 5     | 0.1%       |
| Sp-politiker lovprises etter homofiendtlig lovforslag   |       | 3     | 0.1%       |
| Sp-politiker lovprises etter homovennlig lovforslag     |       | 3     | 0.1%       |

# r7pad14\_headlinesRan\_5: Randomly chosen article headline nr. 5. Background variable conjunction experiment R7PAD14. Background variable conjunction experiment R7PAD14.

| Value                                                                | Label | Cases | Percentage |
|----------------------------------------------------------------------|-------|-------|------------|
| Sp-politiker<br>lovprises: mener<br>det ikke burde<br>være vanskelig |       | 2     | 0.0%       |
| Sp-politiker<br>med Facebook-<br>innlegg: «vi<br>trenger flere mu    |       | 3     | 0.1%       |
| Sp-politiker<br>med Facebook-<br>innlegg: «vi<br>trenger ikke fle    |       | 2     | 0.0%       |
| Sp-politiker<br>med forslag<br>som vil redusere<br>inntektsforsk     |       | 1     | 0.0%       |
| Sp-politiker<br>med forslag<br>som vil øke<br>inntektsforskjelle     |       | 3     | 0.1%       |
| Sp-politiker med<br>homofiendtlig<br>lovforslag                      |       | 3     | 0.1%       |
| Sp-politiker med<br>homovennlig<br>lovforslag                        |       | 2     | 0.0%       |
| Sp-politiker<br>mener alle<br>offentlige<br>aktiviteter ikke<br>kan  |       | 4     | 0.1%       |
| Sp-politiker<br>mener alle<br>offentlige<br>aktiviteter kan<br>gjør  |       | 9     | 0.2%       |
| Sp-politiker<br>mener det<br>burde være<br>vanskeligere for<br>homo  |       | 2     | 0.0%       |
| Sp-politiker<br>mener det er<br>bedre med færre<br>kulturer og r     |       | 4     | 0.1%       |
| Sp-politiker<br>mener det ikke<br>burde være<br>vanskeligere for     |       | 3     | 0.1%       |
| Sp-politiker<br>mener<br>flyktninger bør<br>ha samme rett til<br>so  |       | 3     | 0.1%       |
| Sp-politiker<br>mener<br>flyktninger ikke<br>bør ha samme<br>rett t  |       | 2     | 0.0%       |

**# r7pad14\_headlinesRan\_5: Randomly chosen article headline nr. 5. Background variable conjunction experiment R7PAD14. Background variable conjunction experiment R7PAD14.**

| Value                                                   | Label | Cases | Percentage |
|---------------------------------------------------------|-------|-------|------------|
| Sp-politiker møter massiv motstand - vil ikke åpne fler |       | 1     | 0.0%       |
| Sp-politiker presenterer forslag: vil nekte privatiseri |       | 3     | 0.1%       |
| Sp-politiker presenterer forslag: vil privatisere NSB   |       | 2     | 0.0%       |
| Sp-politiker på Facebook: «Homofile par MÅ IKKE få like |       | 7     | 0.1%       |
| Sp-politiker på Facebook: «Homofile par MÅ få like rett |       | 1     | 0.0%       |
| Sp-politiker skjelles ut ? mener det er bedre med flere |       | 2     | 0.0%       |
| Sp-politiker skjelles ut ? mener det er bedre med færre |       | 1     | 0.0%       |
| Sp-politiker vil ikke åpne flere oljefelt i nord        |       | 3     | 0.1%       |
| Sp-politiker vil åpne flere oljefelt i nord             |       | 2     | 0.0%       |
| Sp-profil blir hedret etter twittermelding ? vil stenge |       | 2     | 0.0%       |
| Sp-profil blir hedret etter twittermelding ? vil åpne f |       | 2     | 0.0%       |
| Sp-profil blir latterligjort etter twittermelding ? vil |       | 3     | 0.1%       |
| Sp-profil i åpent brev: «jeg vil IKKE at flyktinger ska |       | 5     | 0.1%       |
| Sp-profil i åpent brev: «jeg vil at flyktinger skal få  |       | 6     | 0.1%       |
| Sp-profil lanserer forslag om flere                     |       | 2     | 0.0%       |

# r7pad14\_headlinesRan\_5: Randomly chosen article headline nr. 5. Background variable conjunction experiment R7PAD14. Background variable conjunction experiment R7PAD14.

| Value                                                   | Label | Cases | Percentage |
|---------------------------------------------------------|-------|-------|------------|
| privatskoler i Norg                                     |       |       |            |
| Sp-profil lanserer forslag om færre privatskoler i Norg |       | 2     | 0.0%       |
| Sp-profil mener at kommersielle skoler bør forbys       |       | 4     | 0.1%       |
| Sp-profil mener at kommersielle skoler bør tillates     |       | 3     | 0.1%       |
| Sp-profil møter begeistring - mener at kommersielle sko |       | 1     | 0.0%       |
| Sp-profil møter begeistring for forslag om flere privat |       | 2     | 0.0%       |
| Sp-profil møter begeistring for forslag om færre privat |       | 2     | 0.0%       |
| Sp-profil møter proteststorm - mener at kommersielle sk |       | 7     | 0.1%       |
| Sp-profil møter proteststorm for forslag om flere priva |       | 1     | 0.0%       |
| Sp-profil møter proteststorm for forslag om færre priva |       | 2     | 0.0%       |
| Sp-profil på twitter: vil stenge for oljeboring i nord  |       | 2     | 0.0%       |
| Sp-profil på twitter: vil åpne for oljeboring i nord    |       | 1     | 0.0%       |
| Sp-representant refses ? vil sikre at ingen private sko |       | 3     | 0.1%       |
| Sp-representant refses ? vil åpne for at noen private s |       | 1     | 0.0%       |
| Sp-representant roses ? vil sikre                       |       | 2     | 0.0%       |

# r7pad14\_headlinesRan\_5: Randomly chosen article headline nr. 5. Background variable conjunction experiment R7PAD14. Background variable conjunction experiment R7PAD14.

| Value                                                   | Label | Cases | Percentage |
|---------------------------------------------------------|-------|-------|------------|
| at ingen private skol                                   |       |       |            |
| Sp-representant roses ? vil åpne for at noen private sk |       | 2     | 0.0%       |
| Sp-representant vil sikre at ingen private skoler skal  |       | 3     | 0.1%       |
| Sp-representant vil åpne for at noen private skoler ska |       | 2     | 0.0%       |
| Sp-topp kjemper for oljeboring i Lofoten                |       | 6     | 0.1%       |
| Sp-topp kjemper for oljeboring i Lofoten - får massiv s |       | 2     | 0.0%       |
| Sp-topp kjemper for oljeboring i Lofoten - møter massiv |       | 1     | 0.0%       |
| Sp-topp kjemper mot oljeboring i Lofoten                |       | 1     | 0.0%       |
| Sp-topp kjemper mot oljeboring i Lofoten - får massiv s |       | 2     | 0.0%       |
| Sp-topp mener at skattenivået burde reduseres           |       | 1     | 0.0%       |
| Sp-topp presser på for å gi NAV-penger til Syriske flyk |       | 10    | 0.2%       |
| Sp-topp truer med å ta NAV-penger fra Syriske flyktinge |       | 5     | 0.1%       |
| Sp-topp vil gi mer til de rike                          |       | 2     | 0.0%       |
| Sp-topp vil gi mer til de rike - blir refset            |       | 3     | 0.1%       |
| Sp-topp vil ta mer fra de rike                          |       | 2     | 0.0%       |
| Sp-topp vil ta mer fra de rike - blir refset            |       | 2     | 0.0%       |
| Sp-topp vil ta mer fra de rike - blir roset             |       | 1     | 0.0%       |



**# r7pad14\_headlinesRan\_5: Randomly chosen article headline nr. 5. Background variable conjunction experiment R7PAD14. Background variable conjunction experiment R7PAD14.**

| Value                                                               | Label | Cases | Percentage |
|---------------------------------------------------------------------|-------|-------|------------|
| Sp-topp:<br>Vil avskaffe<br>eiendomsskatten<br>i alle norske byer   |       | 3     | 0.1%       |
| Sp-topp:<br>Vil innføre<br>eiendomsskatt i<br>alle norske byer.     |       | 2     | 0.0%       |
| Stjernespiller<br>kampklar til<br>morgendagens<br>kamp              |       | 10    | 0.2%       |
| Stjernespiller<br>snakker om<br>morgendagens<br>kamp                |       | 15    | 0.3%       |
| Stjernespiller ute<br>med skade til<br>morgendagens<br>kamp         |       | 6     | 0.1%       |
| Stormer mot<br>Ap-topp:<br>Vil avskaffe<br>eiendomsskatten<br>i all |       | 4     | 0.1%       |
| Stormer mot Ap-<br>topp: Vil innføre<br>eiendomsskatt i<br>alle n   |       | 1     | 0.0%       |
| Stormer mot<br>Frp-topp:<br>Vil avskaffe<br>eiendomsskatten<br>i al |       | 1     | 0.0%       |
| Stormer mot<br>Frp-topp:<br>Vil innføre<br>eiendomsskatt i<br>alle  |       | 4     | 0.1%       |
| Stormer mot<br>Høyre-topp:<br>Vil avskaffe<br>eiendomsskatten<br>i  |       | 1     | 0.0%       |
| Stormer mot<br>Høyre-topp:<br>Vil innføre<br>eiendomsskatt i<br>all |       | 2     | 0.0%       |
| Stormer mot<br>Krf-topp:<br>Vil innføre<br>eiendomsskatt i<br>alle  |       | 4     | 0.1%       |
| Stormer mot<br>Mdg-topp:<br>Vil avskaffe<br>eiendomsskatten<br>i al |       | 3     | 0.1%       |

**# r7pad14\_headlinesRan\_5: Randomly chosen article headline nr. 5. Background variable conjunction experiment R7PAD14. Background variable conjunction experiment R7PAD14.**

| Value                                                   | Label | Cases | Percentage |
|---------------------------------------------------------|-------|-------|------------|
| Stormer mot Mdg-topp: Vil innføre eiendomsskatt i alle  |       | 6     | 0.1%       |
| Stormer mot Rødt-topp: Vil avskaffe eiendomsskatten i a |       | 2     | 0.0%       |
| Stormer mot Rødt-topp: Vil innføre eiendomsskatt i alle |       | 1     | 0.0%       |
| Stormer mot Sp-topp: Vil avskaffe eiendomsskatten i all |       | 2     | 0.0%       |
| Stormer mot Sp-topp: Vil innføre eiendomsskatt i alle n |       | 3     | 0.1%       |
| Stormer mot Sv-topp: Vil avskaffe eiendomsskatten i all |       | 1     | 0.0%       |
| Stormer mot Sv-topp: Vil innføre eiendomsskatt i alle n |       | 3     | 0.1%       |
| Stormer mot Venstre-topp: Vil avskaffe eiendomsskatten  |       | 2     | 0.0%       |
| Suksesshistoriene om høstens treningstrend              |       | 18    | 0.4%       |
| Sv-politiker fordømmes etter Facebook-innlegg: «vi tren |       | 2     | 0.0%       |
| Sv-politiker får kjeft for forslag som vil redusere inn |       | 5     | 0.1%       |
| Sv-politiker får kjeft for forslag som vil øke inntekts |       | 4     | 0.1%       |
| Sv-politiker får kritikk etter facebook-status: «Homofi |       | 2     | 0.0%       |
| Sv-politiker får massiv støtte                          |       | 3     | 0.1%       |

# r7pad14\_headlinesRan\_5: Randomly chosen article headline nr. 5. Background variable conjunction experiment R7PAD14. Background variable conjunction experiment R7PAD14.

| Value                                                     | Label | Cases | Percentage |
|-----------------------------------------------------------|-------|-------|------------|
| - vil ikke åpne flere ol                                  |       |       |            |
| Sv-politiker får massiv støtte - vil åpne flere oljefel   |       | 1     | 0.0%       |
| Sv-politiker får pepper for forslag: vil privatisere NS   |       | 1     | 0.0%       |
| Sv-politiker får ros etter facebook-status: «Homofile p   |       | 3     | 0.1%       |
| Sv-politiker får skryt for forslag som vil redusere inn   |       | 2     | 0.0%       |
| Sv-politiker får skryt for forslag som vil øke inntekts   |       | 3     | 0.1%       |
| Sv-politiker får skryt for forslag: vil nekte privatisere |       | 1     | 0.0%       |
| Sv-politiker hudflettes etter homofiendtlig lovforslag    |       | 4     | 0.1%       |
| Sv-politiker hudflettes etter homovennlig lovforslag      |       | 4     | 0.1%       |
| Sv-politiker hudflettes: mener det burde være vanskelig   |       | 4     | 0.1%       |
| Sv-politiker hudflettes: mener det ikke burde være vans   |       | 3     | 0.1%       |
| Sv-politiker hylles ? mener det er bedre med flere kult   |       | 2     | 0.0%       |
| Sv-politiker hylles ? mener det er bedre med færre kult   |       | 3     | 0.1%       |
| Sv-politiker lovprises etter Facebook-innlegg: «vi tren   |       | 4     | 0.1%       |
| Sv-politiker lovprises etter homofiendtlig lovforslag     |       | 1     | 0.0%       |

# r7pad14\_headlinesRan\_5: Randomly chosen article headline nr. 5. Background variable conjunction experiment R7PAD14. Background variable conjunction experiment R7PAD14.

| Value                                                   | Label | Cases | Percentage |
|---------------------------------------------------------|-------|-------|------------|
| Sv-politiker lovprises etter homovennlig lovforslag     |       | 2     | 0.0%       |
| Sv-politiker lovprises: mener det burde være vanskelige |       | 1     | 0.0%       |
| Sv-politiker med Facebook-innlegg: «vi trenger flere mu |       | 2     | 0.0%       |
| Sv-politiker med forslag som vil øke inntektsforskjelle |       | 1     | 0.0%       |
| Sv-politiker med homofiendtlig lovforslag               |       | 4     | 0.1%       |
| Sv-politiker med homovennlig lovforslag                 |       | 2     | 0.0%       |
| Sv-politiker mener alle offentlige aktiviteter ikke kan |       | 8     | 0.2%       |
| Sv-politiker mener alle offentlige aktiviteter kan gjør |       | 7     | 0.1%       |
| Sv-politiker mener det burde være vanskeligere for homo |       | 2     | 0.0%       |
| Sv-politiker mener det er bedre med flere kulturer og r |       | 4     | 0.1%       |
| Sv-politiker mener det er bedre med færre kulturer og r |       | 2     | 0.0%       |
| Sv-politiker mener det ikke burde være vanskeligere for |       | 1     | 0.0%       |
| Sv-politiker mener flyktninger bør ha samme rett til so |       | 8     | 0.2%       |
| Sv-politiker mener flyktninger ikke bør ha samme rett t |       | 3     | 0.1%       |

**# r7pad14\_headlinesRan\_5: Randomly chosen article headline nr. 5. Background variable conjunction experiment R7PAD14. Background variable conjunction experiment R7PAD14.**

| Value                                                   | Label | Cases | Percentage |
|---------------------------------------------------------|-------|-------|------------|
| Sv-politiker møter massiv motstand - vil åpne flere olj |       | 3     | 0.1%       |
| Sv-politiker presenterer forslag: vil nekte privatiseri |       | 4     | 0.1%       |
| Sv-politiker presenterer forslag: vil privatisere NSB   |       | 2     | 0.0%       |
| Sv-politiker på Facebook: «Homofile par MÅ IKKE få like |       | 2     | 0.0%       |
| Sv-politiker på Facebook: «Homofile par MÅ få like rett |       | 2     | 0.0%       |
| Sv-politiker skjelles ut ? mener det er bedre med flere |       | 3     | 0.1%       |
| Sv-politiker skjelles ut ? mener det er bedre med færre |       | 1     | 0.0%       |
| Sv-politiker vil ikke åpne flere oljefelt i nord        |       | 2     | 0.0%       |
| Sv-politiker vil åpne flere oljefelt i nord             |       | 2     | 0.0%       |
| Sv-profil blir hedret etter twittermelding ? vil stenge |       | 3     | 0.1%       |
| Sv-profil blir hedret etter twittermelding ? vil åpne f |       | 2     | 0.0%       |
| Sv-profil blir latterligjort etter twittermelding ? vil |       | 6     | 0.1%       |
| Sv-profil i åpent brev: «jeg vil IKKE at flyktinger ska |       | 6     | 0.1%       |
| Sv-profil i åpent brev: «jeg vil at flyktinger skal få  |       | 8     | 0.2%       |
| Sv-profil lanserer forslag om flere                     |       | 1     | 0.0%       |

# r7pad14\_headlinesRan\_5: Randomly chosen article headline nr. 5. Background variable conjunction experiment R7PAD14. Background variable conjunction experiment R7PAD14.

| Value                                                   | Label | Cases | Percentage |
|---------------------------------------------------------|-------|-------|------------|
| privatskoler i Norg                                     |       |       |            |
| Sv-profil lanserer forslag om færre privatskoler i Norg |       | 2     | 0.0%       |
| Sv-profil mener at kommersielle skoler bør forbys       |       | 3     | 0.1%       |
| Sv-profil mener at kommersielle skoler bør tillates     |       | 1     | 0.0%       |
| Sv-profil møter begeistring - mener at kommersielle sko |       | 6     | 0.1%       |
| Sv-profil møter begeistring for forslag om flere privat |       | 4     | 0.1%       |
| Sv-profil møter begeistring for forslag om færre privat |       | 3     | 0.1%       |
| Sv-profil møter proteststorm - mener at kommersielle sk |       | 5     | 0.1%       |
| Sv-profil møter proteststorm for forslag om flere priva |       | 4     | 0.1%       |
| Sv-profil møter proteststorm for forslag om færre priva |       | 2     | 0.0%       |
| Sv-profil på twitter: vil stenge for oljeboring i nord  |       | 4     | 0.1%       |
| Sv-profil på twitter: vil åpne for oljeboring i nord    |       | 1     | 0.0%       |
| Sv-representant refses ? vil sikre at ingen private sko |       | 1     | 0.0%       |
| Sv-representant refses ? vil åpne for at noen private s |       | 3     | 0.1%       |
| Sv-representant roses ? vil sikre                       |       | 1     | 0.0%       |

# r7pad14\_headlinesRan\_5: Randomly chosen article headline nr. 5. Background variable conjunction experiment R7PAD14. Background variable conjunction experiment R7PAD14.

| Value                                                   | Label | Cases | Percentage |
|---------------------------------------------------------|-------|-------|------------|
| at ingen private skol                                   |       |       |            |
| Sv-representant roses ? vil åpne for at noen private sk |       | 3     | 0.1%       |
| Sv-representant vil sikre at ingen private skoler skal  |       | 3     | 0.1%       |
| Sv-topp kjemper for oljeboring i Lofoten                |       | 3     | 0.1%       |
| Sv-topp kjemper for oljeboring i Lofoten - får massiv s |       | 4     | 0.1%       |
| Sv-topp kjemper for oljeboring i Lofoten - møter massiv |       | 3     | 0.1%       |
| Sv-topp kjemper mot oljeboring i Lofoten                |       | 3     | 0.1%       |
| Sv-topp kjemper mot oljeboring i Lofoten - får massiv s |       | 1     | 0.0%       |
| Sv-topp kjemper mot oljeboring i Lofoten - møter massiv |       | 2     | 0.0%       |
| Sv-topp mener at skattenivået burde reduseres           |       | 2     | 0.0%       |
| Sv-topp mener at skattenivået ikke burde reduseres      |       | 2     | 0.0%       |
| Sv-topp presser på for å gi NAV-penger til Syriske flyk |       | 7     | 0.1%       |
| Sv-topp truer med å ta NAV-penger fra Syriske flyktinge |       | 6     | 0.1%       |
| Sv-topp vil gi mer til de rike                          |       | 3     | 0.1%       |
| Sv-topp vil gi mer til de rike - blir refset            |       | 5     | 0.1%       |
| Sv-topp vil gi mer til de rike - blir roset             |       | 2     | 0.0%       |
| Sv-topp vil ta mer fra de rike                          |       | 3     | 0.1%       |

# r7pad14\_headlinesRan\_5: Randomly chosen article headline nr. 5. Background variable conjunction experiment R7PAD14. Background variable conjunction experiment R7PAD14.

| Value                                                   | Label | Cases | Percentage |
|---------------------------------------------------------|-------|-------|------------|
| Sv-topp vil ta mer fra de rike - blir refset            |       | 5     | 0.1%       |
| Sv-topp vil ta mer fra de rike - blir roset             |       | 1     | 0.0%       |
| Sv-topp: Vil avskaffe eiendomsskatten i alle norske bye |       | 1     | 0.0%       |
| TV-profiler gifter seg                                  |       | 12    | 0.3%       |
| TV-profiler skiller seg                                 |       | 11    | 0.2%       |
| TV-profiler snakker om livet sammen                     |       | 14    | 0.3%       |
| Tror Norge spiller uavgjort i morgendagens fotballkamp  |       | 12    | 0.3%       |
| Tror Norge taper i morgendagens fotballkamp             |       | 13    | 0.3%       |
| Tror Norge vinner i morgendagens fotballkamp            |       | 11    | 0.2%       |
| Venstre-politiker fordømmes etter Facebook-innlegg: «vi |       | 9     | 0.2%       |
| Venstre-politiker får kjeft for forslag som vil reduser |       | 1     | 0.0%       |
| Venstre-politiker får kjeft for forslag som vil øke inn |       | 2     | 0.0%       |
| Venstre-politiker får kritikk etter facebook-status: «H |       | 3     | 0.1%       |
| Venstre-politiker får massiv støtte - vil ikke åpne fle |       | 1     | 0.0%       |
| Venstre-politiker får massiv støtte - vil åpne flere ol |       | 1     | 0.0%       |
| Venstre-politiker får ros etter facebook-status: «Homof |       | 4     | 0.1%       |
| Venstre-politiker får skryt for                         |       | 2     | 0.0%       |



# r7pad14\_headlinesRan\_5: Randomly chosen article headline nr. 5. Background variable conjunction experiment R7PAD14. Background variable conjunction experiment R7PAD14.

| Value                                                   | Label | Cases | Percentage |
|---------------------------------------------------------|-------|-------|------------|
| forslag som vil reduser                                 |       |       |            |
| Venstre-politiker får skryt for forslag som vil øke inn |       | 1     | 0.0%       |
| Venstre-politiker får skryt for forslag: vil nekte priv |       | 7     | 0.1%       |
| Venstre-politiker får skryt for forslag: vil privatiser |       | 1     | 0.0%       |
| Venstre-politiker hudflettes etter homofiendtlig lovfor |       | 3     | 0.1%       |
| Venstre-politiker hudflettes etter homovennlig lovforsl |       | 3     | 0.1%       |
| Venstre-politiker hudflettes: mener det burde være vans |       | 5     | 0.1%       |
| Venstre-politiker hudflettes: mener det ikke burde være |       | 2     | 0.0%       |
| Venstre-politiker hylles ? mener det er bedre med flere |       | 1     | 0.0%       |
| Venstre-politiker hylles ? mener det er bedre med færre |       | 3     | 0.1%       |
| Venstre-politiker lovprises etter Facebook-innlegg: «vi |       | 3     | 0.1%       |
| Venstre-politiker lovprises etter homofiendtlig lovfors |       | 2     | 0.0%       |
| Venstre-politiker lovprises: mener det burde være vansk |       | 2     | 0.0%       |
| Venstre-politiker lovprises: mener det ikke burde være  |       | 1     | 0.0%       |
| Venstre-politiker med Facebook-innlegg: «vi trenger fle |       | 3     | 0.1%       |

**# r7pad14\_headlinesRan\_5: Randomly chosen article headline nr. 5. Background variable conjunction experiment R7PAD14. Background variable conjunction experiment R7PAD14.**

| Value                                                   | Label | Cases | Percentage |
|---------------------------------------------------------|-------|-------|------------|
| Venstre-politiker med Facebook-innlegg: «vi trenger ikk |       | 4     | 0.1%       |
| Venstre-politiker med forslag som vil redusere inntekts |       | 2     | 0.0%       |
| Venstre-politiker med forslag som vil øke inntektsforsk |       | 2     | 0.0%       |
| Venstre-politiker med homovennlig lovforslag            |       | 2     | 0.0%       |
| Venstre-politiker mener alle offentlige aktiviteter ikk |       | 7     | 0.1%       |
| Venstre-politiker mener alle offentlige aktiviteter kan |       | 2     | 0.0%       |
| Venstre-politiker mener det burde være vanskeligere for |       | 1     | 0.0%       |
| Venstre-politiker mener det er bedre med flere kulturer |       | 5     | 0.1%       |
| Venstre-politiker mener det er bedre med færre kulturer |       | 2     | 0.0%       |
| Venstre-politiker mener flyktninger bør ha samme rett t |       | 3     | 0.1%       |
| Venstre-politiker mener flyktninger ikke bør ha samme r |       | 7     | 0.1%       |
| Venstre-politiker møter massiv motstand - vil ikke åpne |       | 2     | 0.0%       |
| Venstre-politiker møter massiv motstand - vil åpne fler |       | 2     | 0.0%       |
| Venstre-politiker presenterer forslag: vil privatisere  |       | 1     | 0.0%       |
| Venstre-politiker på Facebook:                          |       | 2     | 0.0%       |

**# r7pad14\_headlinesRan\_5: Randomly chosen article headline nr. 5. Background variable conjunction experiment R7PAD14.Background variable conjunction experiment R7PAD14.**

| Value                                                                | Label | Cases | Percentage |
|----------------------------------------------------------------------|-------|-------|------------|
| «Homofile par<br>MÅ IKKE få                                          |       |       |            |
| Venstre-politiker<br>på Facebook:<br>«Homofile par<br>MÅ få like     |       | 1     | 0.0%       |
| Venstre-politiker<br>skjelles ut ?<br>mener det er<br>bedre med      |       | 3     | 0.1%       |
| Venstre-politiker<br>vil ikke åpne<br>flere oljefelt i<br>nord       |       | 5     | 0.1%       |
| Venstre-politiker<br>vil åpne flere<br>oljefelt i nord               |       | 1     | 0.0%       |
| Venstre-profil<br>blir hedret etter<br>twittermelding ?<br>vil s     |       | 3     | 0.1%       |
| Venstre-profil<br>blir hedret etter<br>twittermelding ?<br>vil å     |       | 3     | 0.1%       |
| Venstre-<br>profil blir<br>latterligjort etter<br>twittermelding     |       | 5     | 0.1%       |
| Venstre-profil<br>i åpent brev:<br>«jeg vil IKKE at<br>flyktinge     |       | 3     | 0.1%       |
| Venstre-profil i<br>åpent brev: «jeg<br>vil at flyktinger<br>ska     |       | 9     | 0.2%       |
| Venstre-<br>profil lanserer<br>forslag om flere<br>privatskoler i    |       | 4     | 0.1%       |
| Venstre-profil<br>lanserer forslag<br>om færre<br>privatskoler i     |       | 3     | 0.1%       |
| Venstre-<br>profil møter<br>begeistring<br>- mener at<br>kommersiell |       | 3     | 0.1%       |
| Venstre-<br>profil møter<br>begeistring for<br>forslag om færre<br>p |       | 1     | 0.0%       |
| Venstre-<br>profil møter<br>proteststorm                             |       | 2     | 0.0%       |

# r7pad14\_headlinesRan\_5: Randomly chosen article headline nr. 5. Background variable conjunction experiment R7PAD14. Background variable conjunction experiment R7PAD14.

| Value                                                   | Label | Cases | Percentage |
|---------------------------------------------------------|-------|-------|------------|
| - mener at kommersiel                                   |       |       |            |
| Venstre-profil møter proteststorm for forslag om flere  |       | 1     | 0.0%       |
| Venstre-profil møter proteststorm for forslag om færre  |       | 1     | 0.0%       |
| Venstre-profil på twitter: vil stenge for oljeboring i  |       | 1     | 0.0%       |
| Venstre-profil på twitter: vil åpne for oljeboring i no |       | 3     | 0.1%       |
| Venstre-representant refses ? vil sikre at ingen privat |       | 2     | 0.0%       |
| Venstre-representant refses ? vil åpne for at noen priv |       | 1     | 0.0%       |
| Venstre-representant roses ? vil sikre at ingen private |       | 2     | 0.0%       |
| Venstre-representant vil sikre at ingen private skoler  |       | 2     | 0.0%       |
| Venstre-representant vil åpne for at noen private skole |       | 3     | 0.1%       |
| Venstre-topp kjemper for oljeboring i Lofoten           |       | 2     | 0.0%       |
| Venstre-topp kjemper for oljeboring i Lofoten - får mas |       | 4     | 0.1%       |
| Venstre-topp kjemper mot oljeboring i Lofoten           |       | 6     | 0.1%       |
| Venstre-topp kjemper mot oljeboring i Lofoten - får mas |       | 3     | 0.1%       |
| Venstre-topp mener at                                   |       | 3     | 0.1%       |

# r7pad14\_headlinesRan\_5: Randomly chosen article headline nr. 5. Background variable conjunction experiment R7PAD14. Background variable conjunction experiment R7PAD14.

| Value                                                            | Label | Cases | Percentage |
|------------------------------------------------------------------|-------|-------|------------|
| skattenivået<br>burde reduseres                                  |       |       |            |
| Venstre-topp<br>mener at<br>skattenivået ikke<br>burde reduseres |       | 2     | 0.0%       |
| Venstre-topp<br>presser på for å<br>gi NAV-penger<br>til Syriske |       | 8     | 0.2%       |
| Venstre-topp<br>truer med å ta<br>NAV-penger fra<br>Syriske flyk |       | 7     | 0.1%       |
| Venstre-topp vil<br>gi mer til de rike                           |       | 3     | 0.1%       |
| Venstre-topp vil<br>gi mer til de rike<br>- blir refset          |       | 3     | 0.1%       |
| Venstre-topp vil<br>ta mer fra de rike                           |       | 3     | 0.1%       |
| Venstre-topp vil<br>ta mer fra de rike<br>- blir refset          |       | 3     | 0.1%       |
| Venstre-topp vil<br>ta mer fra de rike<br>- blir roset           |       | 1     | 0.0%       |
| Venstre-topp:<br>Vil innføre<br>eiendomsskatt i<br>alle norske b |       | 4     | 0.1%       |

Warning: these figures indicate the number of cases found in the data file. They cannot be interpreted as summary statistics of the population of interest.

# r7pad14\_headlinesRan\_6: Randomly chosen article headline nr. 6. Background variable conjunction experiment R7PAD14. Background variable conjunction experiment R7PAD14.

|                            |                                                                                                                                                                                                          |
|----------------------------|----------------------------------------------------------------------------------------------------------------------------------------------------------------------------------------------------------|
| Information                | [Type= discrete] [Format=character] [Missing=*]                                                                                                                                                          |
| Statistics [NW/ W]         | [Valid=4689 /-] [Invalid=0 /-]                                                                                                                                                                           |
| Interviewer's instructions | [Stores a randomly selected news or entertainment article from a population of 1296 news articles and 36 entertainment articles. Contact Sveinung Arnesen or Mikael Johannesson for the complete list. ] |

| Value                                                             | Label | Cases | Percentage |
|-------------------------------------------------------------------|-------|-------|------------|
|                                                                   |       | 1606  | 34.3%      |
| Ap-politiker<br>fordømmes<br>etter Facebook-<br>innlegg: «vi tren |       | 2     | 0.0%       |
| Ap-politiker får<br>kjeft for forslag<br>som vil redusere<br>inn  |       | 3     | 0.1%       |
| Ap-politiker får<br>kjeft for forslag<br>som vil øke<br>inntekts  |       | 1     | 0.0%       |
| Ap-politiker<br>får kritikk etter                                 |       | 5     | 0.1%       |

# r7pad14\_headlinesRan\_6: Randomly chosen article headline nr. 6. Background variable conjunction experiment R7PAD14. Background variable conjunction experiment R7PAD14.

| Value                                                   | Label | Cases | Percentage |
|---------------------------------------------------------|-------|-------|------------|
| facebook-status: «Homofi                                |       |       |            |
| Ap-politiker får massiv støtte - vil åpne flere oljefel |       | 2     | 0.0%       |
| Ap-politiker får pepper for forslag: vil nekte privatis |       | 2     | 0.0%       |
| Ap-politiker får pepper for forslag: vil privatisere NS |       | 4     | 0.1%       |
| Ap-politiker får ros etter facebook-status: «Homofile p |       | 6     | 0.1%       |
| Ap-politiker får skryt for forslag som vil redusere inn |       | 6     | 0.1%       |
| Ap-politiker får skryt for forslag som vil øke inntekts |       | 5     | 0.1%       |
| Ap-politiker får skryt for forslag: vil nekte privatis  |       | 4     | 0.1%       |
| Ap-politiker får skryt for forslag: vil privatisere NSB |       | 1     | 0.0%       |
| Ap-politiker hudflettes etter homofiendtlig lovforslag  |       | 4     | 0.1%       |
| Ap-politiker hudflettes etter homovennlig lovforslag    |       | 4     | 0.1%       |
| Ap-politiker hudflettes: mener det burde være vanskelig |       | 3     | 0.1%       |
| Ap-politiker hudflettes: mener det ikke burde være vans |       | 1     | 0.0%       |
| Ap-politiker hylles ? mener det er bedre med flere kult |       | 2     | 0.0%       |
| Ap-politiker hylles ? mener det er bedre med færre kult |       | 4     | 0.1%       |

# r7pad14\_headlinesRan\_6: Randomly chosen article headline nr. 6. Background variable conjunction experiment R7PAD14. Background variable conjunction experiment R7PAD14.

| Value                                                               | Label | Cases | Percentage |
|---------------------------------------------------------------------|-------|-------|------------|
| Ap-politiker<br>lovprises etter<br>Facebook-<br>innlegg: «vi tren   |       | 4     | 0.1%       |
| Ap-politiker<br>lovprises etter<br>homofiendtlig<br>lovforslag      |       | 2     | 0.0%       |
| Ap-politiker<br>lovprises etter<br>homovennlig<br>lovforslag        |       | 4     | 0.1%       |
| Ap-politiker<br>lovprises: mener<br>det burde være<br>vanskelige    |       | 1     | 0.0%       |
| Ap-politiker<br>lovprises: mener<br>det ikke burde<br>være vansk    |       | 4     | 0.1%       |
| Ap-politiker<br>med Facebook-<br>innlegg: «vi<br>trenger flere mu   |       | 3     | 0.1%       |
| Ap-politiker<br>med Facebook-<br>innlegg: «vi<br>trenger ikke fle   |       | 1     | 0.0%       |
| Ap-politiker<br>med forslag<br>som vil redusere<br>inntektsforsk    |       | 1     | 0.0%       |
| Ap-politiker<br>med forslag<br>som vil øke<br>inntektsforskjelle    |       | 2     | 0.0%       |
| Ap-politiker med<br>homovennlig<br>lovforslag                       |       | 1     | 0.0%       |
| Ap-politiker<br>mener alle<br>offentlige<br>aktiviteter ikke<br>kan |       | 1     | 0.0%       |
| Ap-politiker<br>mener alle<br>offentlige<br>aktiviteter kan<br>gjør |       | 1     | 0.0%       |
| Ap-politiker<br>mener det<br>burde være<br>vanskeligere for<br>homo |       | 2     | 0.0%       |
| Ap-politiker<br>mener det er<br>bedre med flere<br>kulturer og r    |       | 3     | 0.1%       |

# r7pad14\_headlinesRan\_6: Randomly chosen article headline nr. 6. Background variable conjunction experiment R7PAD14. Background variable conjunction experiment R7PAD14.

| Value                                                   | Label | Cases | Percentage |
|---------------------------------------------------------|-------|-------|------------|
| Ap-politiker mener det er bedre med færre kulturer og r |       | 4     | 0.1%       |
| Ap-politiker mener flyktninger bør ha samme rett til so |       | 8     | 0.2%       |
| Ap-politiker mener flyktninger ikke bør ha samme rett t |       | 10    | 0.2%       |
| Ap-politiker møter massiv motstand - vil ikke åpne fler |       | 1     | 0.0%       |
| Ap-politiker møter massiv motstand - vil åpne flere olj |       | 4     | 0.1%       |
| Ap-politiker presenterer forslag: vil nekte privatiseri |       | 1     | 0.0%       |
| Ap-politiker presenterer forslag: vil privatisere NSB   |       | 2     | 0.0%       |
| Ap-politiker på Facebook: «Homofile par MÅ IKKE få like |       | 1     | 0.0%       |
| Ap-politiker på Facebook: «Homofile par MÅ få like rett |       | 3     | 0.1%       |
| Ap-politiker skjelles ut ? mener det er bedre med flere |       | 1     | 0.0%       |
| Ap-politiker skjelles ut ? mener det er bedre med færre |       | 2     | 0.0%       |
| Ap-politiker vil åpne flere oljefelt i nord             |       | 3     | 0.1%       |
| Ap-profil blir hedret etter twittermelding ? vil åpne f |       | 1     | 0.0%       |
| Ap-profil blir latterligjort etter twittermelding ? vil |       | 4     | 0.1%       |



# r7pad14\_headlinesRan\_6: Randomly chosen article headline nr. 6. Background variable conjunction experiment R7PAD14. Background variable conjunction experiment R7PAD14.

| Value                                                               | Label | Cases | Percentage |
|---------------------------------------------------------------------|-------|-------|------------|
| Ap-profil i<br>åpent brev: «jeg<br>vil IKKE at<br>flyktinger ska    |       | 3     | 0.1%       |
| Ap-profil i åpent<br>brev: «jeg vil at<br>flyktinger skal få        |       | 6     | 0.1%       |
| Ap-profil<br>lanserer forslag<br>om flere<br>privatskoler i<br>Norg |       | 1     | 0.0%       |
| Ap-profil<br>lanserer forslag<br>om færre<br>privatskoler i<br>Norg |       | 1     | 0.0%       |
| Ap-profil mener<br>at kommersielle<br>skoler bør forbys             |       | 1     | 0.0%       |
| Ap-profil mener<br>at kommersielle<br>skoler bør<br>tillates        |       | 4     | 0.1%       |
| Ap-profil møter<br>begeistring<br>- mener at<br>kommersielle<br>sko |       | 5     | 0.1%       |
| Ap-profil møter<br>begeistring for<br>forslag om flere<br>privat    |       | 3     | 0.1%       |
| Ap-profil møter<br>begeistring for<br>forslag om færre<br>privat    |       | 3     | 0.1%       |
| Ap-profil møter<br>proteststorm<br>- mener at<br>kommersielle sk    |       | 2     | 0.0%       |
| Ap-profil møter<br>proteststorm for<br>forslag om flere<br>priva    |       | 4     | 0.1%       |
| Ap-profil møter<br>proteststorm for<br>forslag om færre<br>priva    |       | 1     | 0.0%       |
| Ap-profil på<br>twitter: vil<br>stenge for<br>oljeboring i nord     |       | 3     | 0.1%       |
| Ap-profil på<br>twitter: vil åpne<br>for oljeboring i<br>nord       |       | 1     | 0.0%       |

# r7pad14\_headlinesRan\_6: Randomly chosen article headline nr. 6. Background variable conjunction experiment  
R7PAD14.Background variable conjunction experiment R7PAD14.

| Value                                                             | Label | Cases | Percentage |
|-------------------------------------------------------------------|-------|-------|------------|
| Ap-representant<br>refses ? vil åpne<br>for at noen<br>private s  |       | 4     | 0.1%       |
| Ap-representant<br>roses ? vil sikre<br>at ingen private<br>skol  |       | 2     | 0.0%       |
| Ap-representant<br>roses ? vil åpne<br>for at noen<br>private sk  |       | 3     | 0.1%       |
| Ap-representant<br>vil åpne for at<br>noen private<br>skoler ska  |       | 5     | 0.1%       |
| Ap-topp kjemper<br>for oljeboring<br>i Lofoten - får<br>massiv s  |       | 2     | 0.0%       |
| Ap-topp kjemper<br>for oljeboring i<br>Lofoten - møter<br>massiv  |       | 2     | 0.0%       |
| Ap-topp kjemper<br>mot oljeboring i<br>Lofoten                    |       | 2     | 0.0%       |
| Ap-topp kjemper<br>mot oljeboring<br>i Lofoten - får<br>massiv s  |       | 3     | 0.1%       |
| Ap-topp kjemper<br>mot oljeboring i<br>Lofoten - møter<br>massiv  |       | 2     | 0.0%       |
| Ap-topp mener<br>at skattenivået<br>burde reduseres               |       | 2     | 0.0%       |
| Ap-topp mener<br>at skattenivået<br>ikke burde<br>reduseres       |       | 1     | 0.0%       |
| Ap-topp presser<br>på for å gi<br>NAV-penger til<br>Syriske flyk  |       | 7     | 0.1%       |
| Ap-topp truer<br>med å ta NAV-<br>penger fra<br>Syriske flyktinge |       | 5     | 0.1%       |
| Ap-topp vil gi<br>mer til de rike                                 |       | 2     | 0.0%       |
| Ap-topp vil gi<br>mer til de rike -<br>blir refset                |       | 2     | 0.0%       |
| Ap-topp vil gi<br>mer til de rike -<br>blir roset                 |       | 2     | 0.0%       |

# r7pad14\_headlinesRan\_6: Randomly chosen article headline nr. 6. Background variable conjunction experiment R7PAD14. Background variable conjunction experiment R7PAD14.

| Value                                                    | Label | Cases | Percentage |
|----------------------------------------------------------|-------|-------|------------|
| Ap-topp vil ta mer fra de rike                           |       | 2     | 0.0%       |
| Ap-topp vil ta mer fra de rike - blir refset             |       | 4     | 0.1%       |
| Ap-topp vil ta mer fra de rike - blir roset              |       | 1     | 0.0%       |
| Ap-topp: Vil avskaffe eiendomsskatten i alle norske byer |       | 3     | 0.1%       |
| Ap-topp: Vil innføre eiendomsskatt i alle norske byer.   |       | 2     | 0.0%       |
| Denne restauranten er testet av våre anmeldere           |       | 10    | 0.2%       |
| Denne restauranten må du prøve mener våre anmeldere      |       | 11    | 0.2%       |
| Denne restauranten må du unngå mener våre anmeldere      |       | 11    | 0.2%       |
| Dette er det beste for å gå ned i vekt                   |       | 17    | 0.4%       |
| Dette er det verste for å gå ned i vekt                  |       | 17    | 0.4%       |
| Dette er høstens treningstrend                           |       | 10    | 0.2%       |
| Dette kan du gjøre for å ned i vekt                      |       | 20    | 0.4%       |
| Disse TV-ene er med i vår nye test                       |       | 14    | 0.3%       |
| Disse TV-ene kommer best ut i vår nye test               |       | 10    | 0.2%       |
| Disse TV-ene kommer verst ut i vår nye test              |       | 7     | 0.1%       |
| Flere jubler: Ap-topp mener at skattenivået burde redus  |       | 3     | 0.1%       |
| Flere jubler: Ap-topp mener at skattenivået ikke burde   |       | 3     | 0.1%       |

# r7pad14\_headlinesRan\_6: Randomly chosen article headline nr. 6. Background variable conjunction experiment R7PAD14. Background variable conjunction experiment R7PAD14.

| Value                                                               | Label | Cases | Percentage |
|---------------------------------------------------------------------|-------|-------|------------|
| Flere jubler:<br>Frp-topp mener<br>at skattenivået<br>burde redu    |       | 3     | 0.1%       |
| Flere jubler: Frp-<br>topp mener at<br>skattenivået ikke<br>burde   |       | 1     | 0.0%       |
| Flere jubler:<br>Høyre-topp<br>mener at<br>skattenivået<br>burde re |       | 2     | 0.0%       |
| Flere jubler:<br>Høyre-topp<br>mener at<br>skattenivået ikke<br>bur |       | 3     | 0.1%       |
| Flere jubler:<br>Krf-topp mener<br>at skattenivået<br>burde redu    |       | 1     | 0.0%       |
| Flere jubler: Krf-<br>topp mener at<br>skattenivået ikke<br>burde   |       | 1     | 0.0%       |
| Flere jubler:<br>Mdg-topp mener<br>at skattenivået<br>burde redu    |       | 2     | 0.0%       |
| Flere jubler:<br>Mdg-topp mener<br>at skattenivået<br>ikke burde    |       | 1     | 0.0%       |
| Flere jubler:<br>Rødt-topp mener<br>at skattenivået<br>burde red    |       | 2     | 0.0%       |
| Flere jubler:<br>Rødt-topp mener<br>at skattenivået<br>ikke burd    |       | 1     | 0.0%       |
| Flere jubler:<br>Sp-topp mener<br>at skattenivået<br>burde redus    |       | 1     | 0.0%       |
| Flere jubler:<br>Sv-topp mener<br>at skattenivået<br>burde redus    |       | 1     | 0.0%       |
| Flere jubler: Sv-<br>topp mener at<br>skattenivået ikke<br>burde    |       | 5     | 0.1%       |
| Flere jubler:<br>Venstre-topp<br>mener at<br>skattenivået<br>burde  |       | 1     | 0.0%       |

# r7pad14\_headlinesRan\_6: Randomly chosen article headline nr. 6. Background variable conjunction experiment R7PAD14. Background variable conjunction experiment R7PAD14.

| Value                                                      | Label | Cases | Percentage |
|------------------------------------------------------------|-------|-------|------------|
| Flere jubler:<br>Venstre-topp mener at skattenivået ikke b |       | 3     | 0.1%       |
| Flere stormer:<br>Ap-topp mener at skattenivået burde redu |       | 2     | 0.0%       |
| Flere stormer:<br>Ap-topp mener at skattenivået ikke burde |       | 1     | 0.0%       |
| Flere stormer:<br>Frp-topp mener at skattenivået burde red |       | 1     | 0.0%       |
| Flere stormer:<br>Frp-topp mener at skattenivået ikke burd |       | 2     | 0.0%       |
| Flere stormer:<br>Høyre-topp mener at skattenivået burde r |       | 3     | 0.1%       |
| Flere stormer:<br>Høyre-topp mener at skattenivået ikke bu |       | 3     | 0.1%       |
| Flere stormer:<br>Krf-topp mener at skattenivået burde red |       | 1     | 0.0%       |
| Flere stormer:<br>Krf-topp mener at skattenivået ikke burd |       | 2     | 0.0%       |
| Flere stormer:<br>Mdg-topp mener at skattenivået burde red |       | 3     | 0.1%       |
| Flere stormer:<br>Mdg-topp mener at skattenivået ikke burd |       | 1     | 0.0%       |
| Flere stormer:<br>Rødt-topp mener at skattenivået burde re |       | 2     | 0.0%       |
| Flere stormer:<br>Sp-topp mener at skattenivået burde redu |       | 1     | 0.0%       |
| Flere stormer:<br>Sv-topp mener at skattenivået burde redu |       | 4     | 0.1%       |

# r7pad14\_headlinesRan\_6: Randomly chosen article headline nr. 6. Background variable conjunction experiment R7PAD14. Background variable conjunction experiment R7PAD14.

| Value                                                   | Label | Cases | Percentage |
|---------------------------------------------------------|-------|-------|------------|
| Flere stormer: Venstre-topp mener at skattenivået burde |       | 2     | 0.0%       |
| Flere stormer: Venstre-topp mener at skattenivået ikke  |       | 5     | 0.1%       |
| Foreslår å la kommunen ta seg av eldreomsorgen, ansvarl |       | 69    | 1.5%       |
| Foreslår å privatisere eldreomsorgen, ansvarlig Ap-poli |       | 8     | 0.2%       |
| Foreslår å privatisere eldreomsorgen, ansvarlig Frp-pol |       | 7     | 0.1%       |
| Foreslår å privatisere eldreomsorgen, ansvarlig Høyre-p |       | 8     | 0.2%       |
| Foreslår å privatisere eldreomsorgen, ansvarlig Krf-pol |       | 8     | 0.2%       |
| Foreslår å privatisere eldreomsorgen, ansvarlig Mdg-pol |       | 9     | 0.2%       |
| Foreslår å privatisere eldreomsorgen, ansvarlig Rødt-po |       | 5     | 0.1%       |
| Foreslår å privatisere eldreomsorgen, ansvarlig Sp-poli |       | 3     | 0.1%       |
| Foreslår å privatisere eldreomsorgen, ansvarlig Sv-poli |       | 10    | 0.2%       |
| Foreslår å privatisere eldreomsorgen, ansvarlig Venstre |       | 5     | 0.1%       |
| Forslag fra Ap-topp som vil redusere lønnsforskjeller   |       | 1     | 0.0%       |

# r7pad14\_headlinesRan\_6: Randomly chosen article headline nr. 6. Background variable conjunction experiment R7PAD14. Background variable conjunction experiment R7PAD14.

| Value                                                   | Label | Cases | Percentage |
|---------------------------------------------------------|-------|-------|------------|
| Forslag fra Frp-topp som vil redusere lønnsforskjeller  |       | 3     | 0.1%       |
| Forslag fra Frp-topp som vil øke lønnsforskjeller       |       | 1     | 0.0%       |
| Forslag fra Høyre-topp som vil redusere lønnsforskjelle |       | 1     | 0.0%       |
| Forslag fra Høyre-topp som vil øke lønnsforskjeller     |       | 1     | 0.0%       |
| Forslag fra Krf-topp som vil redusere lønnsforskjeller  |       | 2     | 0.0%       |
| Forslag fra Krf-topp som vil øke lønnsforskjeller       |       | 4     | 0.1%       |
| Forslag fra Mdg-topp som vil redusere lønnsforskjeller  |       | 1     | 0.0%       |
| Forslag fra Rødt-topp som vil redusere lønnsforskjeller |       | 2     | 0.0%       |
| Forslag fra Rødt-topp som vil øke lønnsforskjeller      |       | 1     | 0.0%       |
| Forslag fra Sp-topp som vil redusere lønnsforskjeller   |       | 3     | 0.1%       |
| Forslag fra Sp-topp som vil øke lønnsforskjeller        |       | 6     | 0.1%       |
| Forslag fra Sv-topp som vil øke lønnsforskjeller        |       | 1     | 0.0%       |
| Forslag fra Venstre-topp som vil redusere lønnsforskjel |       | 4     | 0.1%       |
| Forslag fra Venstre-topp som vil øke lønnsforskjeller   |       | 1     | 0.0%       |
| Frp-politiker fordømmes etter Facebook-innlegg: «vi tre |       | 4     | 0.1%       |
| Frp-politiker får kjeft for forslag                     |       | 1     | 0.0%       |

# r7pad14\_headlinesRan\_6: Randomly chosen article headline nr. 6. Background variable conjunction experiment R7PAD14. Background variable conjunction experiment R7PAD14.

| Value                                                    | Label | Cases | Percentage |
|----------------------------------------------------------|-------|-------|------------|
| som vil redusere in                                      |       |       |            |
| Frp-politiker får kritikk etter facebook-status: «Homof  |       | 5     | 0.1%       |
| Frp-politiker får massiv støtte - vil ikke åpne flere o  |       | 1     | 0.0%       |
| Frp-politiker får massiv støtte - vil åpne flere oljefe  |       | 2     | 0.0%       |
| Frp-politiker får pepper for forslag: vil nekte privati  |       | 2     | 0.0%       |
| Frp-politiker får pepper for forslag: vil privatisere N  |       | 4     | 0.1%       |
| Frp-politiker får ros etter facebook-status: «Homofile   |       | 5     | 0.1%       |
| Frp-politiker får skryt for forslag som vil redusere in  |       | 2     | 0.0%       |
| Frp-politiker får skryt for forslag som vil øke inntekt  |       | 1     | 0.0%       |
| Frp-politiker får skryt for forslag: vil privatisere NS  |       | 1     | 0.0%       |
| Frp-politiker hudflettes etter homofiendtlig lovforslag  |       | 4     | 0.1%       |
| Frp-politiker hudflettes etter homovennlig lovforslag    |       | 2     | 0.0%       |
| Frp-politiker hudflettes: mener det burde være vanskelig |       | 4     | 0.1%       |
| Frp-politiker hudflettes: mener det ikke burde være van  |       | 2     | 0.0%       |
| Frp-politiker hylles ? mener det er bedre med flere kul  |       | 3     | 0.1%       |



# r7pad14\_headlinesRan\_6: Randomly chosen article headline nr. 6. Background variable conjunction experiment R7PAD14. Background variable conjunction experiment R7PAD14.

| Value                                                   | Label | Cases | Percentage |
|---------------------------------------------------------|-------|-------|------------|
| Frp-politiker hylles ? mener det er bedre med færre kul |       | 1     | 0.0%       |
| Frp-politiker lovprises etter Facebook-innlegg: «vi tre |       | 4     | 0.1%       |
| Frp-politiker lovprises etter homofiendtlig lovforslag  |       | 4     | 0.1%       |
| Frp-politiker lovprises: mener det burde være vanskelig |       | 3     | 0.1%       |
| Frp-politiker lovprises: mener det ikke burde være vans |       | 1     | 0.0%       |
| Frp-politiker med Facebook-innlegg: «vi trenger flere m |       | 2     | 0.0%       |
| Frp-politiker med Facebook-innlegg: «vi trenger ikke fl |       | 2     | 0.0%       |
| Frp-politiker med forslag som vil redusere inntektsfors |       | 6     | 0.1%       |
| Frp-politiker med forslag som vil øke inntektsforskjell |       | 2     | 0.0%       |
| Frp-politiker med homovenlig lovforslag                 |       | 4     | 0.1%       |
| Frp-politiker mener alle offentlige aktiviteter ikke ka |       | 6     | 0.1%       |
| Frp-politiker mener alle offentlige aktiviteter kan gjø |       | 2     | 0.0%       |
| Frp-politiker mener det burde være vanskeligere for hom |       | 2     | 0.0%       |
| Frp-politiker mener det er bedre med flere kulturer og  |       | 2     | 0.0%       |

# r7pad14\_headlinesRan\_6: Randomly chosen article headline nr. 6. Background variable conjunction experiment R7PAD14. Background variable conjunction experiment R7PAD14.

| Value                                                    | Label | Cases | Percentage |
|----------------------------------------------------------|-------|-------|------------|
| Frp-politiker mener det er bedre med færre kulturer og   |       | 1     | 0.0%       |
| Frp-politiker mener det ikke burde være vanskeligere fo  |       | 2     | 0.0%       |
| Frp-politiker mener flyktninger bør ha samme rett til s  |       | 6     | 0.1%       |
| Frp-politiker mener flyktninger ikke bør ha samme rett   |       | 5     | 0.1%       |
| Frp-politiker møter massiv motstand - vil ikke åpne fle  |       | 3     | 0.1%       |
| Frp-politiker møter massiv motstand - vil åpne flere ol  |       | 4     | 0.1%       |
| Frp-politiker presenterer forslag: vil nekte privatiser  |       | 1     | 0.0%       |
| Frp-politiker presenterer forslag: vil privatisere NSB   |       | 2     | 0.0%       |
| Frp-politiker på Facebook: «Homofile par MÅ IKKE få lik  |       | 3     | 0.1%       |
| Frp-politiker på Facebook: «Homofile par MÅ få like ret  |       | 4     | 0.1%       |
| Frp-politiker skjelles ut ? mener det er bedre med fler  |       | 1     | 0.0%       |
| Frp-politiker skjelles ut ? mener det er bedre med færre |       | 4     | 0.1%       |
| Frp-politiker vil ikke åpne flere oljefelt i nord        |       | 2     | 0.0%       |
| Frp-politiker vil åpne flere oljefelt i nord             |       | 3     | 0.1%       |
| Frp-profil blir hedret etter                             |       | 3     | 0.1%       |

# r7pad14\_headlinesRan\_6: Randomly chosen article headline nr. 6. Background variable conjunction experiment R7PAD14. Background variable conjunction experiment R7PAD14.

| Value                                                    | Label | Cases | Percentage |
|----------------------------------------------------------|-------|-------|------------|
| twittermelding ? vil steng                               |       |       |            |
| Frp-profil blir latterliggjort etter twittermelding ? vi |       | 2     | 0.0%       |
| Frp-profil i åpent brev: «jeg vil IKKE at flyktinger sk  |       | 8     | 0.2%       |
| Frp-profil i åpent brev: «jeg vil at flyktinger skal få  |       | 5     | 0.1%       |
| Frp-profil lanserer forslag om flere privatskoler i Nor  |       | 5     | 0.1%       |
| Frp-profil lanserer forslag om færre privatskoler i Nor  |       | 3     | 0.1%       |
| Frp-profil mener at kommersielle skoler bør forbys       |       | 3     | 0.1%       |
| Frp-profil møter begeistring - mener at kommersielle sk  |       | 2     | 0.0%       |
| Frp-profil møter begeistring for forslag om flere priva  |       | 4     | 0.1%       |
| Frp-profil møter begeistring for forslag om færre priva  |       | 2     | 0.0%       |
| Frp-profil møter proteststorm - mener at kommersielle s  |       | 5     | 0.1%       |
| Frp-profil møter proteststorm for forslag om flere priv  |       | 1     | 0.0%       |
| Frp-profil møter proteststorm for forslag om færre priv  |       | 2     | 0.0%       |
| Frp-profil på twitter: vil stenge for oljeboring i nord  |       | 1     | 0.0%       |
| Frp-profil på twitter: vil åpne for oljeboring i nord    |       | 2     | 0.0%       |

# r7pad14\_headlinesRan\_6: Randomly chosen article headline nr. 6. Background variable conjunction experiment R7PAD14. Background variable conjunction experiment R7PAD14.

| Value                                                               | Label | Cases | Percentage |
|---------------------------------------------------------------------|-------|-------|------------|
| Frp-representant<br>refses ? vil sikre<br>at ingen private<br>sk    |       | 1     | 0.0%       |
| Frp-representant<br>roses ? vil åpne<br>for at noen<br>private s    |       | 1     | 0.0%       |
| Frp-representant<br>vil sikre at ingen<br>private skoler<br>skal    |       | 2     | 0.0%       |
| Frp-representant<br>vil åpne for at<br>noen private<br>skoler sk    |       | 4     | 0.1%       |
| Frp-topp<br>kjemper for<br>oljeboring i<br>Lofoten                  |       | 3     | 0.1%       |
| Frp-topp<br>kjemper for<br>oljeboring i<br>Lofoten - får<br>massiv  |       | 3     | 0.1%       |
| Frp-topp<br>kjemper for<br>oljeboring i<br>Lofoten - møter<br>massi |       | 2     | 0.0%       |
| Frp-topp<br>kjemper mot<br>oljeboring i<br>Lofoten                  |       | 1     | 0.0%       |
| Frp-topp<br>kjemper mot<br>oljeboring i<br>Lofoten - får<br>massiv  |       | 2     | 0.0%       |
| Frp-topp mener<br>at skattenivået<br>burde reduseres                |       | 3     | 0.1%       |
| Frp-topp mener<br>at skattenivået<br>ikke burde<br>reduseres        |       | 4     | 0.1%       |
| Frp-topp presser<br>på for å gi<br>NAV-penger til<br>Syriske fly    |       | 10    | 0.2%       |
| Frp-topp truer<br>med å ta NAV-<br>penger fra<br>Syriske flykting   |       | 8     | 0.2%       |
| Frp-topp vil gi<br>mer til de rike                                  |       | 1     | 0.0%       |

# r7pad14\_headlinesRan\_6: Randomly chosen article headline nr. 6. Background variable conjunction experiment R7PAD14. Background variable conjunction experiment R7PAD14.

| Value                                                   | Label | Cases | Percentage |
|---------------------------------------------------------|-------|-------|------------|
| Frp-topp vil gi mer til de rike - blir refset           |       | 2     | 0.0%       |
| Frp-topp vil gi mer til de rike - blir roset            |       | 3     | 0.1%       |
| Frp-topp vil ta mer fra de rike - blir refset           |       | 1     | 0.0%       |
| Frp-topp vil ta mer fra de rike - blir roset            |       | 1     | 0.0%       |
| Frp-topp: Vil avskaffe eiendomsskatten i alle norske by |       | 3     | 0.1%       |
| Frp-topp: Vil innføre eiendomsskatt i alle norske byer. |       | 1     | 0.0%       |
| Helgens konsert                                         |       | 13    | 0.3%       |
| Her er helgens filmer                                   |       | 21    | 0.4%       |
| Her er helgens filmer du bør se                         |       | 9     | 0.2%       |
| Her er helgens filmer du bør unngå                      |       | 15    | 0.3%       |
| Her er vinterens beste smarttelefoner                   |       | 13    | 0.3%       |
| Her er vinterens smarttelefoner                         |       | 13    | 0.3%       |
| Her er vinterens verste smarttelefoner                  |       | 16    | 0.3%       |
| Her går konserten fryktelig galt                        |       | 16    | 0.3%       |
| Her går konserten skikkelig bra                         |       | 9     | 0.2%       |
| Høyre-politiker fordømmes etter Facebook-innlegg: «vi t |       | 2     | 0.0%       |
| Høyre-politiker får kjeft for forslag som vil redusere  |       | 1     | 0.0%       |
| Høyre-politiker får kritikk etter facebook-status: «Hom |       | 5     | 0.1%       |
| Høyre-politiker får massiv støtte                       |       | 3     | 0.1%       |

# r7pad14\_headlinesRan\_6: Randomly chosen article headline nr. 6. Background variable conjunction experiment R7PAD14. Background variable conjunction experiment R7PAD14.

| Value                                                      | Label | Cases | Percentage |
|------------------------------------------------------------|-------|-------|------------|
| - vil ikke åpne flere                                      |       |       |            |
| Høyre-politiker får massiv støtte<br>- vil åpne flere olje |       | 2     | 0.0%       |
| Høyre-politiker får pepper for forslag: vil nekte priva    |       | 1     | 0.0%       |
| Høyre-politiker får pepper for forslag: vil privatisere    |       | 1     | 0.0%       |
| Høyre-politiker får ros etter facebook-status: «Homofil    |       | 3     | 0.1%       |
| Høyre-politiker får skryt for forslag som vil øke innte    |       | 4     | 0.1%       |
| Høyre-politiker får skryt for forslag: vil privatisere     |       | 2     | 0.0%       |
| Høyre-politiker hudflettes etter homofiendtlig lovforsl    |       | 1     | 0.0%       |
| Høyre-politiker hudflettes etter homovenntlig lovforslag   |       | 3     | 0.1%       |
| Høyre-politiker hudflettes: mener det burde være vanske    |       | 3     | 0.1%       |
| Høyre-politiker hudflettes: mener det ikke burde være v    |       | 4     | 0.1%       |
| Høyre-politiker hylles ? mener det er bedre med flere k    |       | 1     | 0.0%       |
| Høyre-politiker hylles ? mener det er bedre med færre k    |       | 2     | 0.0%       |
| Høyre-politiker lovprises etter Facebook-innlegg: «vi t    |       | 4     | 0.1%       |
| Høyre-politiker lovprises etter homofiendtlig lovforsla    |       | 1     | 0.0%       |

# r7pad14\_headlinesRan\_6: Randomly chosen article headline nr. 6. Background variable conjunction experiment R7PAD14. Background variable conjunction experiment R7PAD14.

| Value                                                     | Label | Cases | Percentage |
|-----------------------------------------------------------|-------|-------|------------|
| Høyre-politiker lovprises: mener det burde være vanskelig |       | 4     | 0.1%       |
| Høyre-politiker lovprises: mener det ikke burde være va   |       | 2     | 0.0%       |
| Høyre-politiker med Facebook-innlegg: «vi trenger flere   |       | 4     | 0.1%       |
| Høyre-politiker med Facebook-innlegg: «vi trenger ikke    |       | 3     | 0.1%       |
| Høyre-politiker med forslag som vil redusere inntektsfo   |       | 1     | 0.0%       |
| Høyre-politiker med homofiendtlig lovforslag              |       | 2     | 0.0%       |
| Høyre-politiker med homovenlig lovforslag                 |       | 4     | 0.1%       |
| Høyre-politiker mener alle offentlige aktiviteter ikke    |       | 8     | 0.2%       |
| Høyre-politiker mener alle offentlige aktiviteter kan g   |       | 5     | 0.1%       |
| Høyre-politiker mener det burde være vanskeligere for h   |       | 2     | 0.0%       |
| Høyre-politiker mener det er bedre med færre kulturer o   |       | 4     | 0.1%       |
| Høyre-politiker mener flyktninger bør ha samme rett til   |       | 4     | 0.1%       |
| Høyre-politiker mener flyktninger ikke bør ha samme ret   |       | 5     | 0.1%       |
| Høyre-politiker møter massiv motstand - vil ikke åpne f   |       | 1     | 0.0%       |

# r7pad14\_headlinesRan\_6: Randomly chosen article headline nr. 6. Background variable conjunction experiment R7PAD14. Background variable conjunction experiment R7PAD14.

| Value                                                   | Label | Cases | Percentage |
|---------------------------------------------------------|-------|-------|------------|
| Høyre-politiker møter massiv motstand - vil åpne flere  |       | 1     | 0.0%       |
| Høyre-politiker presenterer forslag: vil privatisere NS |       | 4     | 0.1%       |
| Høyre-politiker på Facebook: «Homofile par MÅ IKKE få l |       | 2     | 0.0%       |
| Høyre-politiker på Facebook: «Homofile par MÅ få like r |       | 1     | 0.0%       |
| Høyre-politiker skjelles ut ? mener det er bedre med fl |       | 3     | 0.1%       |
| Høyre-politiker skjelles ut ? mener det er bedre med fæ |       | 4     | 0.1%       |
| Høyre-politiker vil ikke åpne flere oljefelt i nord     |       | 1     | 0.0%       |
| Høyre-politiker vil åpne flere oljefelt i nord          |       | 3     | 0.1%       |
| Høyre-profil blir hedret etter twittermelding ? vil ste |       | 1     | 0.0%       |
| Høyre-profil blir hedret etter twittermelding ? vil åpn |       | 2     | 0.0%       |
| Høyre-profil blir latterligjort etter twittermelding ?  |       | 1     | 0.0%       |
| Høyre-profil i åpent brev: «jeg vil IKKE at flyktinger  |       | 4     | 0.1%       |
| Høyre-profil i åpent brev: «jeg vil at flyktinger skal  |       | 9     | 0.2%       |
| Høyre-profil lanserer forslag om flere privatskoler i N |       | 2     | 0.0%       |
| Høyre-profil lanserer forslag om færre privatskoler i N |       | 2     | 0.0%       |



# r7pad14\_headlinesRan\_6: Randomly chosen article headline nr. 6. Background variable conjunction experiment R7PAD14. Background variable conjunction experiment R7PAD14.

| Value                                                    | Label | Cases | Percentage |
|----------------------------------------------------------|-------|-------|------------|
| Høyre-profil mener at kommersielle skoler bør forbys     |       | 2     | 0.0%       |
| Høyre-profil mener at kommersielle skoler bør tillates   |       | 2     | 0.0%       |
| Høyre-profil møter begeistring - mener at kommersielle   |       | 7     | 0.1%       |
| Høyre-profil møter begeistring for forslag om flere pri  |       | 3     | 0.1%       |
| Høyre-profil møter proteststorm - mener at kommersielle  |       | 7     | 0.1%       |
| Høyre-profil møter proteststorm for forslag om flere pr  |       | 2     | 0.0%       |
| Høyre-profil møter proteststorm for forslag om færre pr  |       | 2     | 0.0%       |
| Høyre-profil på twitter: vil stenge for oljeboring i no  |       | 1     | 0.0%       |
| Høyre-representant refsers ? vil sikre at ingen private  |       | 5     | 0.1%       |
| Høyre-representant refsers ? vil åpne for at noen privat |       | 1     | 0.0%       |
| Høyre-representant roses ? vil sikre at ingen private s  |       | 4     | 0.1%       |
| Høyre-representant vil sikre at ingen private skoler sk  |       | 1     | 0.0%       |
| Høyre-representant vil åpne for at noen private skoler   |       | 2     | 0.0%       |

# r7pad14\_headlinesRan\_6: Randomly chosen article headline nr. 6. Background variable conjunction experiment R7PAD14. Background variable conjunction experiment R7PAD14.

| Value                                                   | Label | Cases | Percentage |
|---------------------------------------------------------|-------|-------|------------|
| Høyre-topp kjemper for oljeboring i Lofoten             |       | 2     | 0.0%       |
| Høyre-topp kjemper for oljeboring i Lofoten - får massi |       | 4     | 0.1%       |
| Høyre-topp kjemper for oljeboring i Lofoten - møter mas |       | 5     | 0.1%       |
| Høyre-topp kjemper mot oljeboring i Lofoten             |       | 4     | 0.1%       |
| Høyre-topp kjemper mot oljeboring i Lofoten - møter mas |       | 2     | 0.0%       |
| Høyre-topp mener at skattenivået burde reduseres        |       | 2     | 0.0%       |
| Høyre-topp mener at skattenivået ikke burde reduseres   |       | 1     | 0.0%       |
| Høyre-topp presser på for å gi NAV-penger til Syriske f |       | 5     | 0.1%       |
| Høyre-topp truer med å ta NAV-penger fra Syriske flykti |       | 5     | 0.1%       |
| Høyre-topp vil gi mer til de rike                       |       | 2     | 0.0%       |
| Høyre-topp vil gi mer til de rike - blir roset          |       | 2     | 0.0%       |
| Høyre-topp vil ta mer fra de rike                       |       | 1     | 0.0%       |
| Høyre-topp vil ta mer fra de rike - blir refset         |       | 2     | 0.0%       |
| Høyre-topp vil ta mer fra de rike - blir roset          |       | 3     | 0.1%       |
| Høyre-topp: Vil avskaffe eiendomsskatten i alle norske  |       | 2     | 0.0%       |
| Høyre-topp: Vil innføre                                 |       | 2     | 0.0%       |

# r7pad14\_headlinesRan\_6: Randomly chosen article headline nr. 6. Background variable conjunction experiment R7PAD14. Background variable conjunction experiment R7PAD14.

| Value                                                   | Label | Cases | Percentage |
|---------------------------------------------------------|-------|-------|------------|
| eiendomsskatt i alle norske byer                        |       |       |            |
| Jubler for Ap-topp: Vil avskaffe eiendomsskatten i alle |       | 1     | 0.0%       |
| Jubler for Ap-topp: Vil innføre eiendomsskatt i alle no |       | 1     | 0.0%       |
| Jubler for Frp-topp: Vil avskaffe eiendomsskatten i all |       | 2     | 0.0%       |
| Jubler for Frp-topp: Vil innføre eiendomsskatt i alle n |       | 3     | 0.1%       |
| Jubler for Høyre-topp: Vil avskaffe eiendomsskatten i a |       | 3     | 0.1%       |
| Jubler for Mdg-topp: Vil avskaffe eiendomsskatten i all |       | 3     | 0.1%       |
| Jubler for Mdg-topp: Vil innføre eiendomsskatt i alle n |       | 3     | 0.1%       |
| Jubler for Rødt-topp: Vil avskaffe eiendomsskatten i al |       | 3     | 0.1%       |
| Jubler for Rødt-topp: Vil innføre eiendomsskatt i alle  |       | 2     | 0.0%       |
| Jubler for Sp-topp: Vil avskaffe eiendomsskatten i alle |       | 1     | 0.0%       |
| Jubler for Sv-topp: Vil avskaffe eiendomsskatten i alle |       | 2     | 0.0%       |
| Jubler for Sv-topp: Vil innføre eiendomsskatt i alle no |       | 1     | 0.0%       |
| Jubler for Venstre-topp:                                |       | 1     | 0.0%       |

# r7pad14\_headlinesRan\_6: Randomly chosen article headline nr. 6. Background variable conjunction experiment R7PAD14. Background variable conjunction experiment R7PAD14.

| Value                                                   | Label | Cases | Percentage |
|---------------------------------------------------------|-------|-------|------------|
| Vil avskaffe eiendomsskatten i                          |       |       |            |
| Jubler for Venstre-topp: Vil innføre eiendomsskatt i al |       | 1     | 0.0%       |
| Kjendisfesten ble holdt i går                           |       | 10    | 0.2%       |
| Kjendisfesten gikk skikkelig galt                       |       | 10    | 0.2%       |
| Kjendisfesten var en stor suksess                       |       | 14    | 0.3%       |
| Krf-politiker fordømmes etter Facebook-innlegg: «vi tre |       | 2     | 0.0%       |
| Krf-politiker får kjeft for forslag som vil øke inntekt |       | 1     | 0.0%       |
| Krf-politiker får kritikk etter facebook-status: «Homof |       | 5     | 0.1%       |
| Krf-politiker får massiv støtte - vil ikke åpne flere o |       | 1     | 0.0%       |
| Krf-politiker får massiv støtte - vil åpne flere oljefe |       | 2     | 0.0%       |
| Krf-politiker får pepper for forslag: vil nekte privati |       | 1     | 0.0%       |
| Krf-politiker får pepper for forslag: vil privatisere N |       | 2     | 0.0%       |
| Krf-politiker får ros etter facebook-status: «Homofile  |       | 8     | 0.2%       |
| Krf-politiker får skryt for forslag som vil redusere in |       | 4     | 0.1%       |
| Krf-politiker får skryt for forslag som vil øke inntekt |       | 4     | 0.1%       |

# r7pad14\_headlinesRan\_6: Randomly chosen article headline nr. 6. Background variable conjunction experiment R7PAD14. Background variable conjunction experiment R7PAD14.

| Value                                                    | Label | Cases | Percentage |
|----------------------------------------------------------|-------|-------|------------|
| Krf-politiker får skryt for forslag: vil nekte privatis  |       | 3     | 0.1%       |
| Krf-politiker får skryt for forslag: vil privatisere NS  |       | 3     | 0.1%       |
| Krf-politiker hudflettes etter homofiendtlig lovforslag  |       | 4     | 0.1%       |
| Krf-politiker hudflettes etter homovennlig lovforslag    |       | 1     | 0.0%       |
| Krf-politiker hudflettes: mener det burde være vanskelig |       | 1     | 0.0%       |
| Krf-politiker hudflettes: mener det ikke burde være van  |       | 2     | 0.0%       |
| Krf-politiker hylles ? mener det er bedre med flere kul  |       | 3     | 0.1%       |
| Krf-politiker hylles ? mener det er bedre med færre kul  |       | 1     | 0.0%       |
| Krf-politiker lovprises etter Facebook-innlegg: «vi tre  |       | 4     | 0.1%       |
| Krf-politiker lovprises etter homofiendtlig lovforslag   |       | 3     | 0.1%       |
| Krf-politiker lovprises etter homovennlig lovforslag     |       | 2     | 0.0%       |
| Krf-politiker lovprises: mener det ikke burde være vans  |       | 3     | 0.1%       |
| Krf-politiker med Facebook-innlegg: «vi trenger flere m  |       | 1     | 0.0%       |
| Krf-politiker med forslag som vil redusere inntektsfors  |       | 1     | 0.0%       |
| Krf-politiker med forslag                                |       | 3     | 0.1%       |

# r7pad14\_headlinesRan\_6: Randomly chosen article headline nr. 6. Background variable conjunction experiment R7PAD14. Background variable conjunction experiment R7PAD14.

| Value                                                   | Label | Cases | Percentage |
|---------------------------------------------------------|-------|-------|------------|
| som vil øke inntektsforskjell                           |       |       |            |
| Krf-politiker med homofiendtlig lovforslag              |       | 3     | 0.1%       |
| Krf-politiker med homovenkelig lovforslag               |       | 5     | 0.1%       |
| Krf-politiker mener alle offentlige aktiviteter ikke ka |       | 6     | 0.1%       |
| Krf-politiker mener alle offentlige aktiviteter kan gjø |       | 6     | 0.1%       |
| Krf-politiker mener det burde være vanskeligere for hom |       | 2     | 0.0%       |
| Krf-politiker mener det er bedre med flere kulturer og  |       | 2     | 0.0%       |
| Krf-politiker mener det er bedre med færre kulturer og  |       | 1     | 0.0%       |
| Krf-politiker mener det ikke burde være vanskeligere fo |       | 1     | 0.0%       |
| Krf-politiker mener flyktninger bør ha samme rett til s |       | 7     | 0.1%       |
| Krf-politiker mener flyktninger ikke bør ha samme rett  |       | 8     | 0.2%       |
| Krf-politiker møter massiv motstand - vil ikke åpne fle |       | 2     | 0.0%       |
| Krf-politiker møter massiv motstand - vil åpne flere ol |       | 4     | 0.1%       |
| Krf-politiker presenterer forslag: vil privatisere NSB  |       | 1     | 0.0%       |

# r7pad14\_headlinesRan\_6: Randomly chosen article headline nr. 6. Background variable conjunction experiment R7PAD14. Background variable conjunction experiment R7PAD14.

| Value                                                    | Label | Cases | Percentage |
|----------------------------------------------------------|-------|-------|------------|
| Krf-politiker på Facebook: «Homofile par MÅ IKKE få lik  |       | 4     | 0.1%       |
| Krf-politiker på Facebook: «Homofile par MÅ få like ret  |       | 2     | 0.0%       |
| Krf-politiker skjelles ut ? mener det er bedre med færre |       | 2     | 0.0%       |
| Krf-politiker vil ikke åpne flere oljefelt i nord        |       | 1     | 0.0%       |
| Krf-politiker vil åpne flere oljefelt i nord             |       | 1     | 0.0%       |
| Krf-profil blir hedret etter twittermelding ? vil steng  |       | 1     | 0.0%       |
| Krf-profil blir hedret etter twittermelding ? vil åpne   |       | 1     | 0.0%       |
| Krf-profil blir latterliggjort etter twittermelding ? vi |       | 6     | 0.1%       |
| Krf-profil i åpent brev: «jeg vil IKKE at flyktinger sk  |       | 2     | 0.0%       |
| Krf-profil i åpent brev: «jeg vil at flyktinger skal få  |       | 4     | 0.1%       |
| Krf-profil lanserer forslag om flere privatskoler i Nor  |       | 1     | 0.0%       |
| Krf-profil lanserer forslag om færre privatskoler i Nor  |       | 1     | 0.0%       |
| Krf-profil mener at kommersielle skoler bør forbys       |       | 2     | 0.0%       |
| Krf-profil mener at kommersielle skoler bør tillates     |       | 2     | 0.0%       |
| Krf-profil møter begeistring - mener at kommersielle sk  |       | 2     | 0.0%       |

# r7pad14\_headlinesRan\_6: Randomly chosen article headline nr. 6. Background variable conjunction experiment R7PAD14. Background variable conjunction experiment R7PAD14.

| Value                                                   | Label | Cases | Percentage |
|---------------------------------------------------------|-------|-------|------------|
| Krf-profil møter begeistring for forslag om flere priva |       | 1     | 0.0%       |
| Krf-profil møter begeistring for forslag om færre priva |       | 1     | 0.0%       |
| Krf-profil møter proteststorm - mener at kommersielle s |       | 2     | 0.0%       |
| Krf-profil møter proteststorm for forslag om flere priv |       | 3     | 0.1%       |
| Krf-profil møter proteststorm for forslag om færre priv |       | 1     | 0.0%       |
| Krf-profil på twitter: vil stenge for oljeboring i nord |       | 3     | 0.1%       |
| Krf-profil på twitter: vil åpne for oljeboring i nord   |       | 2     | 0.0%       |
| Krf-representant refses ? vil sikre at ingen private sk |       | 3     | 0.1%       |
| Krf-representant refses ? vil åpne for at noen private  |       | 4     | 0.1%       |
| Krf-representant roses ? vil sikre at ingen private sko |       | 1     | 0.0%       |
| Krf-representant roses ? vil åpne for at noen private s |       | 1     | 0.0%       |
| Krf-representant vil sikre at ingen private skoler skal |       | 1     | 0.0%       |
| Krf-representant vil åpne for at noen private skoler sk |       | 2     | 0.0%       |
| Krf-topp kjemper for oljeboring i Lofoten               |       | 3     | 0.1%       |
| Krf-topp kjemper for                                    |       | 2     | 0.0%       |



# r7pad14\_headlinesRan\_6: Randomly chosen article headline nr. 6. Background variable conjunction experiment R7PAD14. Background variable conjunction experiment R7PAD14.

| Value                                                   | Label | Cases | Percentage |
|---------------------------------------------------------|-------|-------|------------|
| oljeboring i Lofoten - får massiv                       |       |       |            |
| Krf-topp kjemper for oljeboring i Lofoten - møter massi |       | 2     | 0.0%       |
| Krf-topp kjemper mot oljeboring i Lofoten               |       | 1     | 0.0%       |
| Krf-topp kjemper mot oljeboring i Lofoten - får massiv  |       | 2     | 0.0%       |
| Krf-topp kjemper mot oljeboring i Lofoten - møter massi |       | 2     | 0.0%       |
| Krf-topp mener at skattenivået ikke burde reduseres     |       | 2     | 0.0%       |
| Krf-topp presser på for å gi NAV-penger til Syriske fly |       | 4     | 0.1%       |
| Krf-topp truer med å ta NAV-penger fra Syriske flykting |       | 2     | 0.0%       |
| Krf-topp vil gi mer til de rike                         |       | 1     | 0.0%       |
| Krf-topp vil gi mer til de rike - blir refset           |       | 1     | 0.0%       |
| Krf-topp vil ta mer fra de rike                         |       | 6     | 0.1%       |
| Krf-topp vil ta mer fra de rike - blir refset           |       | 3     | 0.1%       |
| Krf-topp vil ta mer fra de rike - blir roset            |       | 3     | 0.1%       |
| Krf-topp: Vil avskaffe eiendomsskatten i alle norske by |       | 1     | 0.0%       |
| Krf-topp: Vil innføre eiendomsskatt i alle norske byer. |       | 2     | 0.0%       |
| Lokal Ap-politiker ? vil                                |       | 1     | 0.0%       |

# r7pad14\_headlinesRan\_6: Randomly chosen article headline nr. 6. Background variable conjunction experiment R7PAD14. Background variable conjunction experiment R7PAD14.

| Value                                                   | Label | Cases | Percentage |
|---------------------------------------------------------|-------|-------|------------|
| hindre at vi tar imot 5000 nye                          |       |       |            |
| Lokal Ap-politiker ? vil ta imot 5000 nye flyktninger   |       | 2     | 0.0%       |
| Lokal Ap-politiker hylles ? vil hindre at vi tar imot 5 |       | 2     | 0.0%       |
| Lokal Ap-politiker hylles ? vil ta imot 5000 nye flyktn |       | 7     | 0.1%       |
| Lokal Ap-politiker skjelles ut ? vil hindre at vi tar i |       | 1     | 0.0%       |
| Lokal Ap-politiker skjelles ut ? vil ta imot 5000 nye f |       | 1     | 0.0%       |
| Lokal Frp-politiker ? vil hindre at vi tar imot 5000 ny |       | 3     | 0.1%       |
| Lokal Frp-politiker ? vil ta imot 5000 nye flyktninger  |       | 2     | 0.0%       |
| Lokal Frp-politiker hylles ? vil ta imot 5000 nye flykt |       | 2     | 0.0%       |
| Lokal Frp-politiker skjelles ut ? vil hindre at vi tar  |       | 5     | 0.1%       |
| Lokal Frp-politiker skjelles ut ? vil ta imot 5000 nye  |       | 3     | 0.1%       |
| Lokal Høyre-politiker ? vil hindre at vi tar imot 5000  |       | 5     | 0.1%       |
| Lokal Høyre-politiker ? vil ta imot 5000 nye flyktninge |       | 3     | 0.1%       |
| Lokal Høyre-politiker hylles ? vil hindre at vi tar imo |       | 2     | 0.0%       |
| Lokal Høyre-politiker hylles ? vil ta imot 5000 nye fly |       | 2     | 0.0%       |

# r7pad14\_headlinesRan\_6: Randomly chosen article headline nr. 6. Background variable conjunction experiment  
R7PAD14.Background variable conjunction experiment R7PAD14.

| Value                                                   | Label | Cases | Percentage |
|---------------------------------------------------------|-------|-------|------------|
| Lokal Høyre-politiker skjelles ut ? vil hindre at vi ta |       | 2     | 0.0%       |
| Lokal Høyre-politiker skjelles ut ? vil ta imot 5000 ny |       | 1     | 0.0%       |
| Lokal Krf-politiker ? vil hindre at vi tar imot 5000 ny |       | 2     | 0.0%       |
| Lokal Krf-politiker ? vil ta imot 5000 nye flyktninger  |       | 2     | 0.0%       |
| Lokal Krf-politiker hylles ? vil hindre at vi tar imot  |       | 1     | 0.0%       |
| Lokal Krf-politiker hylles ? vil ta imot 5000 nye flykt |       | 1     | 0.0%       |
| Lokal Krf-politiker skjelles ut ? vil hindre at vi tar  |       | 2     | 0.0%       |
| Lokal Krf-politiker skjelles ut ? vil ta imot 5000 nye  |       | 2     | 0.0%       |
| Lokal Mdg-politiker ? vil hindre at vi tar imot 5000 ny |       | 3     | 0.1%       |
| Lokal Mdg-politiker ? vil ta imot 5000 nye flyktninger  |       | 3     | 0.1%       |
| Lokal Mdg-politiker hylles ? vil ta imot 5000 nye flykt |       | 3     | 0.1%       |
| Lokal Mdg-politiker skjelles ut ? vil hindre at vi tar  |       | 2     | 0.0%       |
| Lokal Rødt-politiker ? vil hindre at vi tar imot 5000 n |       | 1     | 0.0%       |
| Lokal Rødt-politiker ? vil ta imot 5000 nye flyktninger |       | 1     | 0.0%       |
| Lokal Rødt-politiker hylles ?                           |       | 4     | 0.1%       |

# r7pad14\_headlinesRan\_6: Randomly chosen article headline nr. 6. Background variable conjunction experiment R7PAD14. Background variable conjunction experiment R7PAD14.

| Value                                                   | Label | Cases | Percentage |
|---------------------------------------------------------|-------|-------|------------|
| vil hindre at vi tar imot                               |       |       |            |
| Lokal Rødt-politiker hylles ? vil ta imot 5000 nye flyk |       | 2     | 0.0%       |
| Lokal Rødt-politiker skjelles ut ? vil hindre at vi tar |       | 2     | 0.0%       |
| Lokal Sp-politiker ? vil hindre at vi tar imot 5000 nye |       | 2     | 0.0%       |
| Lokal Sp-politiker ? vil ta imot 5000 nye flyktninger   |       | 1     | 0.0%       |
| Lokal Sp-politiker hylles ? vil hindre at vi tar imot 5 |       | 2     | 0.0%       |
| Lokal Sp-politiker hylles ? vil ta imot 5000 nye flyktn |       | 2     | 0.0%       |
| Lokal Sp-politiker skjelles ut ? vil hindre at vi tar i |       | 1     | 0.0%       |
| Lokal Sp-politiker skjelles ut ? vil ta imot 5000 nye f |       | 1     | 0.0%       |
| Lokal Sv-politiker ? vil ta imot 5000 nye flyktninger   |       | 5     | 0.1%       |
| Lokal Sv-politiker hylles ? vil hindre at vi tar imot 5 |       | 4     | 0.1%       |
| Lokal Sv-politiker hylles ? vil ta imot 5000 nye flyktn |       | 3     | 0.1%       |
| Lokal Sv-politiker skjelles ut ? vil hindre at vi tar i |       | 2     | 0.0%       |
| Lokal Sv-politiker skjelles ut ? vil ta imot 5000 nye f |       | 4     | 0.1%       |
| Lokal Venstre-politiker ? vil hindre at vi tar imot 500 |       | 4     | 0.1%       |

# r7pad14\_headlinesRan\_6: Randomly chosen article headline nr. 6. Background variable conjunction experiment R7PAD14. Background variable conjunction experiment R7PAD14.

| Value                                                   | Label | Cases | Percentage |
|---------------------------------------------------------|-------|-------|------------|
| Lokal Venstre-politiker hylles ? vil hindre at vi tar i |       | 1     | 0.0%       |
| Lokal Venstre-politiker hylles ? vil ta imot 5000 nye f |       | 3     | 0.1%       |
| Lokal Venstre-politiker skjelles ut ? vil ta imot 5000  |       | 2     | 0.0%       |
| Marerithistoriene om høstens treningstrend              |       | 11    | 0.2%       |
| Mdg-politiker fordømmes etter Facebook-innlegg: «vi tre |       | 4     | 0.1%       |
| Mdg-politiker får kjeft for forslag som vil redusere in |       | 2     | 0.0%       |
| Mdg-politiker får kjeft for forslag som vil øke inntekt |       | 1     | 0.0%       |
| Mdg-politiker får kritikk etter facebook-status: «Homof |       | 6     | 0.1%       |
| Mdg-politiker får massiv støtte - vil åpne flere oljefe |       | 3     | 0.1%       |
| Mdg-politiker får pepper for forslag: vil nekte privati |       | 4     | 0.1%       |
| Mdg-politiker får ros etter facebook-status: «Homofile  |       | 2     | 0.0%       |
| Mdg-politiker får skryt for forslag som vil redusere in |       | 3     | 0.1%       |
| Mdg-politiker får skryt for forslag som vil øke inntekt |       | 1     | 0.0%       |
| Mdg-politiker får skryt for forslag: vil privatisere NS |       | 3     | 0.1%       |
| Mdg-politiker hudflettes etter                          |       | 1     | 0.0%       |

# r7pad14\_headlinesRan\_6: Randomly chosen article headline nr. 6. Background variable conjunction experiment R7PAD14. Background variable conjunction experiment R7PAD14.

| Value                                                             | Label | Cases | Percentage |
|-------------------------------------------------------------------|-------|-------|------------|
| homofiendtlig<br>lovforslag                                       |       |       |            |
| Mdg-politiker<br>hudflettes etter<br>homovennlig<br>lovforslag    |       | 2     | 0.0%       |
| Mdg-politiker<br>hudflettes:<br>mener det burde<br>være vanskelig |       | 1     | 0.0%       |
| Mdg-politiker<br>hudflettes:<br>mener det ikke<br>burde være van  |       | 2     | 0.0%       |
| Mdg-politiker<br>hylles ? mener<br>det er bedre med<br>flere kul  |       | 4     | 0.1%       |
| Mdg-politiker<br>hylles ? mener<br>det er bedre med<br>færre kul  |       | 2     | 0.0%       |
| Mdg-politiker<br>lovprises etter<br>Facebook-<br>innlegg: «vi tre |       | 3     | 0.1%       |
| Mdg-politiker<br>lovprises etter<br>homofiendtlig<br>lovforslag   |       | 5     | 0.1%       |
| Mdg-politiker<br>lovprises etter<br>homovennlig<br>lovforslag     |       | 1     | 0.0%       |
| Mdg-politiker<br>lovprises: mener<br>det burde være<br>vanskelig  |       | 1     | 0.0%       |
| Mdg-politiker<br>lovprises: mener<br>det ikke burde<br>være vans  |       | 1     | 0.0%       |
| Mdg-politiker<br>med Facebook-<br>innlegg: «vi<br>trenger ikke fl |       | 3     | 0.1%       |
| Mdg-politiker<br>med forslag<br>som vil redusere<br>inntektsfors  |       | 3     | 0.1%       |
| Mdg-politiker<br>med forslag<br>som vil øke<br>inntektsforskjell  |       | 1     | 0.0%       |
| Mdg-<br>politiker med<br>homofiendtlig<br>lovforslag              |       | 4     | 0.1%       |

# r7pad14\_headlinesRan\_6: Randomly chosen article headline nr. 6. Background variable conjunction experiment R7PAD14. Background variable conjunction experiment R7PAD14.

| Value                                                   | Label | Cases | Percentage |
|---------------------------------------------------------|-------|-------|------------|
| Mdg-politiker med homovenlig lovforslag                 |       | 1     | 0.0%       |
| Mdg-politiker mener alle offentlige aktiviteter ikke ka |       | 9     | 0.2%       |
| Mdg-politiker mener alle offentlige aktiviteter kan gjo |       | 6     | 0.1%       |
| Mdg-politiker mener det burde være vanskeligere for hom |       | 2     | 0.0%       |
| Mdg-politiker mener det er bedre med flere kulturer og  |       | 2     | 0.0%       |
| Mdg-politiker mener det ikke burde være vanskeligere fo |       | 2     | 0.0%       |
| Mdg-politiker mener flyktninger bør ha samme rett til s |       | 4     | 0.1%       |
| Mdg-politiker mener flyktninger ikke bør ha samme rett  |       | 4     | 0.1%       |
| Mdg-politiker møter massiv motstand - vil ikke åpne fle |       | 2     | 0.0%       |
| Mdg-politiker møter massiv motstand - vil åpne flere ol |       | 3     | 0.1%       |
| Mdg-politiker presenterer forslag: vil nekte privatiser |       | 1     | 0.0%       |
| Mdg-politiker presenterer forslag: vil privatisere NSB  |       | 2     | 0.0%       |
| Mdg-politiker på Facebook: «Homofile par MÅ få like ret |       | 4     | 0.1%       |
| Mdg-politiker skjelles ut ?                             |       | 1     | 0.0%       |

# r7pad14\_headlinesRan\_6: Randomly chosen article headline nr. 6. Background variable conjunction experiment R7PAD14. Background variable conjunction experiment R7PAD14.

| Value                                                       | Label | Cases | Percentage |
|-------------------------------------------------------------|-------|-------|------------|
| mener det er bedre med fler                                 |       |       |            |
| Mdg-politiker skjelles ut ?<br>mener det er bedre med færre |       | 1     | 0.0%       |
| Mdg-politiker vil ikke åpne flere oljefelt i nord           |       | 1     | 0.0%       |
| Mdg-politiker vil åpne flere oljefelt i nord                |       | 3     | 0.1%       |
| Mdg-profil blir hedret etter twittermelding ?<br>vil steng  |       | 1     | 0.0%       |
| Mdg-profil blir hedret etter twittermelding ?<br>vil åpne   |       | 3     | 0.1%       |
| Mdg-profil blir latterliggjort etter twittermelding ?<br>vi |       | 6     | 0.1%       |
| Mdg-profil i åpent brev: «jeg vil IKKE at flyktinger sk     |       | 10    | 0.2%       |
| Mdg-profil i åpent brev: «jeg vil at flyktinger skal få     |       | 6     | 0.1%       |
| Mdg-profil lanserer forslag om flere privatskoler i Nor     |       | 2     | 0.0%       |
| Mdg-profil mener at kommersielle skoler bør forbys          |       | 2     | 0.0%       |
| Mdg-profil mener at kommersielle skoler bør tillates        |       | 4     | 0.1%       |
| Mdg-profil møter begeistring - mener at kommersielle sk     |       | 2     | 0.0%       |
| Mdg-profil møter begeistring for forslag om flere priva     |       | 2     | 0.0%       |
| Mdg-profil møter begeistring for                            |       | 2     | 0.0%       |



# r7pad14\_headlinesRan\_6: Randomly chosen article headline nr. 6. Background variable conjunction experiment R7PAD14. Background variable conjunction experiment R7PAD14.

| Value                                                                | Label | Cases | Percentage |
|----------------------------------------------------------------------|-------|-------|------------|
| forslag om færre<br>priva                                            |       |       |            |
| Mdg-profil<br>møter<br>proteststorm<br>- mener at<br>kommersielle s  |       | 3     | 0.1%       |
| Mdg-profil<br>møter<br>proteststorm for<br>forslag om flere<br>priv  |       | 4     | 0.1%       |
| Mdg-profil<br>møter<br>proteststorm for<br>forslag om færre<br>priv  |       | 2     | 0.0%       |
| Mdg-profil<br>på twitter:<br>vil stenge for<br>oljeboring i nord     |       | 2     | 0.0%       |
| Mdg-profil på<br>twitter: vil åpne<br>for oljeboring i<br>nord       |       | 1     | 0.0%       |
| Mdg-<br>representant<br>refses ? vil sikre<br>at ingen private<br>sk |       | 3     | 0.1%       |
| Mdg-<br>representant<br>refses ? vil<br>åpne for at noen<br>private  |       | 3     | 0.1%       |
| Mdg-<br>representant<br>roses ? vil sikre<br>at ingen private<br>sko |       | 2     | 0.0%       |
| Mdg-<br>representant vil<br>sikre at ingen<br>private skoler<br>skal |       | 1     | 0.0%       |
| Mdg-<br>representant vil<br>åpne for at noen<br>private skoler sk    |       | 2     | 0.0%       |
| Mdg-topp<br>kjemper for<br>oljeboring i<br>Lofoten                   |       | 3     | 0.1%       |
| Mdg-topp<br>kjemper for<br>oljeboring i<br>Lofoten - får<br>massiv   |       | 1     | 0.0%       |

# r7pad14\_headlinesRan\_6: Randomly chosen article headline nr. 6. Background variable conjunction experiment R7PAD14. Background variable conjunction experiment R7PAD14.

| Value                                                   | Label | Cases | Percentage |
|---------------------------------------------------------|-------|-------|------------|
| Mdg-topp kjemper for oljeboring i Lofoten - møter massi |       | 2     | 0.0%       |
| Mdg-topp kjemper mot oljeboring i Lofoten               |       | 2     | 0.0%       |
| Mdg-topp kjemper mot oljeboring i Lofoten - får massiv  |       | 1     | 0.0%       |
| Mdg-topp kjemper mot oljeboring i Lofoten - møter massi |       | 6     | 0.1%       |
| Mdg-topp mener at skattenivået burde reduseres          |       | 5     | 0.1%       |
| Mdg-topp mener at skattenivået ikke burde reduseres     |       | 2     | 0.0%       |
| Mdg-topp presser på for å gi NAV-penger til Syriske fly |       | 6     | 0.1%       |
| Mdg-topp truer med å ta NAV-penger fra Syriske flykting |       | 2     | 0.0%       |
| Mdg-topp vil gi mer til de rike                         |       | 3     | 0.1%       |
| Mdg-topp vil gi mer til de rike - blir refset           |       | 4     | 0.1%       |
| Mdg-topp vil gi mer til de rike - blir roset            |       | 1     | 0.0%       |
| Mdg-topp vil ta mer fra de rike                         |       | 3     | 0.1%       |
| Mdg-topp vil ta mer fra de rike - blir refset           |       | 2     | 0.0%       |
| Mdg-topp: Vil avskaffe eiendomsskatten i alle norske by |       | 2     | 0.0%       |
| Mdg-topp: Vil innføre eiendomsskatt i alle norske byer. |       | 3     | 0.1%       |
| Norges store sangstjerne                                |       | 13    | 0.3%       |

# r7pad14\_headlinesRan\_6: Randomly chosen article headline nr. 6. Background variable conjunction experiment R7PAD14. Background variable conjunction experiment R7PAD14.

| Value                                                   | Label | Cases | Percentage |
|---------------------------------------------------------|-------|-------|------------|
| får refs i fersk anmeldelse                             |       |       |            |
| Norges store sangstjerne får ros i fersk anmeldelse     |       | 13    | 0.3%       |
| Norges store sangstjerne i fersk anmeldelse             |       | 12    | 0.3%       |
| Politiker fra Ap vil senke formueskatten                |       | 2     | 0.0%       |
| Politiker fra Ap vil senke formueskatten, blir roset    |       | 3     | 0.1%       |
| Politiker fra Ap vil senke formueskatten, mottar sterk  |       | 1     | 0.0%       |
| Politiker fra Ap vil øke formueskatten                  |       | 2     | 0.0%       |
| Politiker fra Ap vil øke formueskatten, blir roset      |       | 1     | 0.0%       |
| Politiker fra Ap vil øke formueskatten, mottar sterk kr |       | 3     | 0.1%       |
| Politiker fra Frp vil senke formueskatten               |       | 1     | 0.0%       |
| Politiker fra Frp vil senke formueskatten, blir roset   |       | 5     | 0.1%       |
| Politiker fra Frp vil senke formueskatten, mottar sterk |       | 1     | 0.0%       |
| Politiker fra Frp vil øke formueskatten                 |       | 2     | 0.0%       |
| Politiker fra Frp vil øke formueskatten, blir roset     |       | 1     | 0.0%       |
| Politiker fra Frp vil øke formueskatten, mottar sterk k |       | 3     | 0.1%       |
| Politiker fra Høyre vil senke formueskatten             |       | 1     | 0.0%       |
| Politiker fra Høyre vil senke                           |       | 1     | 0.0%       |

# r7pad14\_headlinesRan\_6: Randomly chosen article headline nr. 6. Background variable conjunction experiment  
R7PAD14.Background variable conjunction experiment R7PAD14.

| Value                                                            | Label | Cases | Percentage |
|------------------------------------------------------------------|-------|-------|------------|
| formueskatten,<br>blir roset                                     |       |       |            |
| Politiker fra<br>Høyre vil senke<br>formueskatten,<br>mottar ste |       | 1     | 0.0%       |
| Politiker fra<br>Høyre vil øke<br>formueskatten                  |       | 2     | 0.0%       |
| Politiker fra<br>Høyre vil øke<br>formueskatten,<br>blir roset   |       | 2     | 0.0%       |
| Politiker fra<br>Høyre vil øke<br>formueskatten,<br>mottar sterk |       | 3     | 0.1%       |
| Politiker fra<br>Krf vil senke<br>formueskatten,<br>blir roset   |       | 3     | 0.1%       |
| Politiker fra<br>Krf vil senke<br>formueskatten,<br>mottar sterk |       | 4     | 0.1%       |
| Politiker fra<br>Krf vil øke<br>formueskatten                    |       | 1     | 0.0%       |
| Politiker fra<br>Krf vil øke<br>formueskatten,<br>blir roset     |       | 3     | 0.1%       |
| Politiker fra<br>Mdg vil senke<br>formueskatten                  |       | 1     | 0.0%       |
| Politiker fra<br>Mdg vil senke<br>formueskatten,<br>blir roset   |       | 1     | 0.0%       |
| Politiker fra<br>Mdg vil senke<br>formueskatten,<br>mottar sterk |       | 3     | 0.1%       |
| Politiker fra<br>Mdg vil øke<br>formueskatten                    |       | 1     | 0.0%       |
| Politiker fra<br>Mdg vil øke<br>formueskatten,<br>blir roset     |       | 2     | 0.0%       |
| Politiker fra<br>Mdg vil øke<br>formueskatten,<br>mottar sterk k |       | 1     | 0.0%       |
| Politiker fra<br>Rødt vil senke<br>formueskatten                 |       | 2     | 0.0%       |

# r7pad14\_headlinesRan\_6: Randomly chosen article headline nr. 6. Background variable conjunction experiment R7PAD14. Background variable conjunction experiment R7PAD14.

| Value                                                   | Label | Cases | Percentage |
|---------------------------------------------------------|-------|-------|------------|
| Politiker fra Rødt vil senke formueskatten, mottar ster |       | 4     | 0.1%       |
| Politiker fra Rødt vil øke formueskatten                |       | 3     | 0.1%       |
| Politiker fra Rødt vil øke formueskatten, blir roset    |       | 1     | 0.0%       |
| Politiker fra Rødt vil øke formueskatten, mottar sterk  |       | 4     | 0.1%       |
| Politiker fra Sp vil senke formueskatten                |       | 2     | 0.0%       |
| Politiker fra Sp vil senke formueskatten, blir roset    |       | 2     | 0.0%       |
| Politiker fra Sp vil øke formueskatten                  |       | 4     | 0.1%       |
| Politiker fra Sp vil øke formueskatten, blir roset      |       | 1     | 0.0%       |
| Politiker fra Sp vil øke formueskatten, mottar sterk kr |       | 2     | 0.0%       |
| Politiker fra Sv vil senke formueskatten, blir roset    |       | 1     | 0.0%       |
| Politiker fra Sv vil senke formueskatten, mottar sterk  |       | 2     | 0.0%       |
| Politiker fra Sv vil øke formueskatten, blir roset      |       | 1     | 0.0%       |
| Politiker fra Sv vil øke formueskatten, mottar sterk kr |       | 3     | 0.1%       |
| Politiker fra Venstre vil senke formueskatten           |       | 1     | 0.0%       |
| Politiker fra Venstre vil senke formueskatten, blir ros |       | 1     | 0.0%       |

# r7pad14\_headlinesRan\_6: Randomly chosen article headline nr. 6. Background variable conjunction experiment R7PAD14. Background variable conjunction experiment R7PAD14.

| Value                                                   | Label | Cases | Percentage |
|---------------------------------------------------------|-------|-------|------------|
| Politiker fra Venstre vil senke formueskatten, mottar s |       | 2     | 0.0%       |
| Politiker fra Venstre vil øke formueskatten, blir roset |       | 2     | 0.0%       |
| Politiker fra Venstre vil øke formueskatten, mottar ste |       | 1     | 0.0%       |
| Refser forslag fra Ap-topp som vil redusere lønnsforskj |       | 2     | 0.0%       |
| Refser forslag fra Ap-topp som vil øke lønnsforskjeller |       | 1     | 0.0%       |
| Refser forslag fra Frp-topp som vil redusere lønnsforsk |       | 2     | 0.0%       |
| Refser forslag fra Frp-topp som vil øke lønnsforskjelle |       | 5     | 0.1%       |
| Refser forslag fra Høyre-topp som vil redusere lønnsfor |       | 2     | 0.0%       |
| Refser forslag fra Høyre-topp som vil øke lønnsforskjel |       | 2     | 0.0%       |
| Refser forslag fra Krf-topp som vil redusere lønnsforsk |       | 2     | 0.0%       |
| Refser forslag fra Krf-topp som vil øke lønnsforskjelle |       | 5     | 0.1%       |
| Refser forslag fra Mdg-topp som vil redusere lønnsforsk |       | 1     | 0.0%       |
| Refser forslag fra Rødt-topp som vil redusere lønnsfors |       | 3     | 0.1%       |
| Refser forslag fra Sp-topp som vil redusere lønnsforskj |       | 1     | 0.0%       |

# r7pad14\_headlinesRan\_6: Randomly chosen article headline nr. 6. Background variable conjunction experiment  
R7PAD14.Background variable conjunction experiment R7PAD14.

| Value                                                   | Label | Cases | Percentage |
|---------------------------------------------------------|-------|-------|------------|
| Refser forslag fra Sv-topp som vil redusere lønnsforskj |       | 2     | 0.0%       |
| Refser forslag fra Sv-topp som vil øke lønnsforskjeller |       | 2     | 0.0%       |
| Refser forslag fra Venstre-topp som vil redusere lønnsf |       | 4     | 0.1%       |
| Refser forslag fra Venstre-topp som vil øke lønnsforskj |       | 1     | 0.0%       |
| Roser forslag fra Ap-topp som vil redusere lønnsforskje |       | 4     | 0.1%       |
| Roser forslag fra Ap-topp som vil øke lønnsforskjeller  |       | 4     | 0.1%       |
| Roser forslag fra Frp-topp som vil redusere lønnsforskj |       | 1     | 0.0%       |
| Roser forslag fra Frp-topp som vil øke lønnsforskjeller |       | 3     | 0.1%       |
| Roser forslag fra Krf-topp som vil redusere lønnsforskj |       | 3     | 0.1%       |
| Roser forslag fra Krf-topp som vil øke lønnsforskjeller |       | 1     | 0.0%       |
| Roser forslag fra Mdg-topp som vil redusere lønnsforskj |       | 1     | 0.0%       |
| Roser forslag fra Mdg-topp som vil øke lønnsforskjeller |       | 1     | 0.0%       |
| Roser forslag fra Rødt-topp som vil redusere lønnsforsk |       | 4     | 0.1%       |
| Roser forslag fra Rødt-topp som vil øke lønnsforskjelle |       | 4     | 0.1%       |
| Roser forslag fra Sp-topp som                           |       | 4     | 0.1%       |

# r7pad14\_headlinesRan\_6: Randomly chosen article headline nr. 6. Background variable conjunction experiment R7PAD14. Background variable conjunction experiment R7PAD14.

| Value                                                   | Label | Cases | Percentage |
|---------------------------------------------------------|-------|-------|------------|
| vil redusere lønnsforskje                               |       |       |            |
| Roser forslag fra Sp-topp som vil øke lønnsforskjeller  |       | 4     | 0.1%       |
| Roser forslag fra Sv-topp som vil redusere lønnsforskje |       | 2     | 0.0%       |
| Roser forslag fra Sv-topp som vil øke lønnsforskjeller  |       | 5     | 0.1%       |
| Roser forslag fra Venstre-topp som vil redusere lønnsfo |       | 1     | 0.0%       |
| Roser forslag fra Venstre-topp som vil øke lønnsforskje |       | 4     | 0.1%       |
| Rødt-politiker får kjeft for forslag som vil redusere i |       | 2     | 0.0%       |
| Rødt-politiker får kritikk etter facebook-status: «Homo |       | 2     | 0.0%       |
| Rødt-politiker får massiv støtte - vil ikke åpne flere  |       | 4     | 0.1%       |
| Rødt-politiker får pepper for forslag: vil nekte privat |       | 4     | 0.1%       |
| Rødt-politiker får pepper for forslag: vil privatisere  |       | 1     | 0.0%       |
| Rødt-politiker får ros etter facebook-status: «Homofile |       | 2     | 0.0%       |
| Rødt-politiker får skryt for forslag som vil redusere i |       | 1     | 0.0%       |
| Rødt-politiker får skryt for forslag som vil øke inntek |       | 3     | 0.1%       |
| Rødt-politiker får skryt for forslag: vil privatisere N |       | 2     | 0.0%       |



# r7pad14\_headlinesRan\_6: Randomly chosen article headline nr. 6. Background variable conjunction experiment R7PAD14. Background variable conjunction experiment R7PAD14.

| Value                                                             | Label | Cases | Percentage |
|-------------------------------------------------------------------|-------|-------|------------|
| Rødt-politiker<br>hudflettes etter<br>homofiendtlig<br>lovforsla  |       | 1     | 0.0%       |
| Rødt-politiker<br>hudflettes etter<br>homovennlig<br>lovforslag   |       | 7     | 0.1%       |
| Rødt-politiker<br>hudflettes:<br>mener det burde<br>være vanskel  |       | 4     | 0.1%       |
| Rødt-politiker<br>hudflettes:<br>mener det ikke<br>burde være va  |       | 3     | 0.1%       |
| Rødt-politiker<br>hylles ? mener<br>det er bedre med<br>flere ku  |       | 2     | 0.0%       |
| Rødt-politiker<br>lovprises etter<br>Facebook-<br>innlegg: «vi tr |       | 5     | 0.1%       |
| Rødt-politiker<br>lovprises etter<br>homofiendtlig<br>lovforslag  |       | 2     | 0.0%       |
| Rødt-politiker<br>lovprises etter<br>homovennlig<br>lovforslag    |       | 2     | 0.0%       |
| Rødt-politiker<br>lovprises: mener<br>det ikke burde<br>være van  |       | 1     | 0.0%       |
| Rødt-politiker<br>med Facebook-<br>innlegg: «vi<br>trenger flere  |       | 1     | 0.0%       |
| Rødt-politiker<br>med Facebook-<br>innlegg: «vi<br>trenger ikke f |       | 3     | 0.1%       |
| Rødt-politiker<br>med forslag<br>som vil redusere<br>inntektsfor  |       | 4     | 0.1%       |
| Rødt-politiker<br>med forslag<br>som vil øke<br>inntektsforskjel  |       | 2     | 0.0%       |
| Rødt-<br>politiker med<br>homofiendtlig<br>lovforslag             |       | 4     | 0.1%       |
| Rødt-<br>politiker med                                            |       | 3     | 0.1%       |

# r7pad14\_headlinesRan\_6: Randomly chosen article headline nr. 6. Background variable conjunction experiment R7PAD14. Background variable conjunction experiment R7PAD14.

| Value                                                               | Label | Cases | Percentage |
|---------------------------------------------------------------------|-------|-------|------------|
| homovennlig<br>lovforslag                                           |       |       |            |
| Rødt-politiker<br>mener alle<br>offentlige<br>aktiviteter ikke k    |       | 4     | 0.1%       |
| Rødt-politiker<br>mener alle<br>offentlige<br>aktiviteter kan gj    |       | 3     | 0.1%       |
| Rødt-politiker<br>mener det<br>burde være<br>vanskeligere for<br>ho |       | 2     | 0.0%       |
| Rødt-politiker<br>mener det er<br>bedre med flere<br>kulturer og    |       | 1     | 0.0%       |
| Rødt-politiker<br>mener det er<br>bedre med færre<br>kulturer og    |       | 2     | 0.0%       |
| Rødt-politiker<br>mener det ikke<br>burde være<br>vanskeligere f    |       | 4     | 0.1%       |
| Rødt-politiker<br>mener<br>flyktninger bør<br>ha samme rett til     |       | 8     | 0.2%       |
| Rødt-politiker<br>mener<br>flyktninger ikke<br>bør ha samme<br>rett |       | 2     | 0.0%       |
| Rødt-politiker<br>møter massiv<br>motstand - vil<br>ikke åpne fl    |       | 1     | 0.0%       |
| Rødt-politiker<br>presenterer<br>forslag: vil nekte<br>privatisere  |       | 1     | 0.0%       |
| Rødt-politiker<br>presenterer<br>forslag: vil<br>privatisere NSB    |       | 3     | 0.1%       |
| Rødt-politiker<br>på Facebook:<br>«Homofile par<br>MÅ få like re    |       | 1     | 0.0%       |
| Rødt-politiker<br>skjelles ut ?<br>mener det er<br>bedre med fle    |       | 2     | 0.0%       |
| Rødt-politiker<br>skjelles ut ?                                     |       | 1     | 0.0%       |

# r7pad14\_headlinesRan\_6: Randomly chosen article headline nr. 6. Background variable conjunction experiment R7PAD14. Background variable conjunction experiment R7PAD14.

| Value                                                    | Label | Cases | Percentage |
|----------------------------------------------------------|-------|-------|------------|
| mener det er bedre med fær                               |       |       |            |
| Rødt-politiker vil ikke åpne flere oljefelt i nord       |       | 4     | 0.1%       |
| Rødt-politiker vil åpne flere oljefelt i nord            |       | 2     | 0.0%       |
| Rødt-profil blir hedret etter twittermelding ? vil sten  |       | 2     | 0.0%       |
| Rødt-profil blir hedret etter twittermelding ? vil åpne  |       | 3     | 0.1%       |
| Rødt-profil blir latterliggjort etter twittermelding ? v |       | 2     | 0.0%       |
| Rødt-profil i åpent brev: «jeg vil IKKE at flyktinger s  |       | 6     | 0.1%       |
| Rødt-profil i åpent brev: «jeg vil at flyktinger skal f  |       | 1     | 0.0%       |
| Rødt-profil lanserer forslag om flere privatskoler i No  |       | 1     | 0.0%       |
| Rødt-profil lanserer forslag om færre privatskoler i No  |       | 4     | 0.1%       |
| Rødt-profil mener at kommersielle skoler bør forbys      |       | 2     | 0.0%       |
| Rødt-profil mener at kommersielle skoler bør tillates    |       | 2     | 0.0%       |
| Rødt-profil møter begeistring - mener at kommersielle s  |       | 5     | 0.1%       |
| Rødt-profil møter begeistring for forslag om flere priv  |       | 5     | 0.1%       |
| Rødt-profil møter begeistring for                        |       | 2     | 0.0%       |

# r7pad14\_headlinesRan\_6: Randomly chosen article headline nr. 6. Background variable conjunction experiment R7PAD14. Background variable conjunction experiment R7PAD14.

| Value                                                                | Label | Cases | Percentage |
|----------------------------------------------------------------------|-------|-------|------------|
| forslag om færre<br>priv                                             |       |       |            |
| Rødt-profil<br>møter<br>proteststorm<br>- mener at<br>kommersielle   |       | 4     | 0.1%       |
| Rødt-profil<br>møter<br>proteststorm for<br>forslag om flere<br>pri  |       | 1     | 0.0%       |
| Rødt-profil<br>møter<br>proteststorm for<br>forslag om færre<br>pri  |       | 2     | 0.0%       |
| Rødt-profil<br>på twitter:<br>vil stenge for<br>oljeboring i nor     |       | 1     | 0.0%       |
| Rødt-profil på<br>twitter: vil åpne<br>for oljeboring i<br>nord      |       | 3     | 0.1%       |
| Rødt-<br>representant<br>refses ? vil sikre<br>at ingen private s    |       | 2     | 0.0%       |
| Rødt-<br>representant<br>refses ? vil<br>åpne for at noen<br>private |       | 4     | 0.1%       |
| Rødt-<br>representant<br>roses ? vil sikre<br>at ingen private<br>sk |       | 3     | 0.1%       |
| Rødt-<br>representant<br>roses ? vil åpne<br>for at noen<br>private  |       | 2     | 0.0%       |
| Rødt-<br>representant vil<br>sikre at ingen<br>private skoler<br>ska |       | 2     | 0.0%       |
| Rødt-<br>representant vil<br>åpne for at noen<br>private skoler s    |       | 1     | 0.0%       |
| Rødt-topp<br>kjemper for<br>oljeboring i<br>Lofoten                  |       | 1     | 0.0%       |
| Rødt-topp<br>kjemper for                                             |       | 1     | 0.0%       |

# r7pad14\_headlinesRan\_6: Randomly chosen article headline nr. 6. Background variable conjunction experiment R7PAD14. Background variable conjunction experiment R7PAD14.

| Value                                                   | Label | Cases | Percentage |
|---------------------------------------------------------|-------|-------|------------|
| oljeboring i Lofoten - får massiv                       |       |       |            |
| Rødt-topp kjemper for oljeboring i Lofoten - møter mass |       | 4     | 0.1%       |
| Rødt-topp kjemper mot oljeboring i Lofoten - får massiv |       | 3     | 0.1%       |
| Rødt-topp kjemper mot oljeboring i Lofoten - møter mass |       | 6     | 0.1%       |
| Rødt-topp mener at skattenivået burde reduseres         |       | 2     | 0.0%       |
| Rødt-topp presser på for å gi NAV-penger til Syriske fl |       | 5     | 0.1%       |
| Rødt-topp truer med å ta NAV-penger fra Syriske flyktin |       | 6     | 0.1%       |
| Rødt-topp vil gi mer til de rike                        |       | 1     | 0.0%       |
| Rødt-topp vil gi mer til de rike - blir refset          |       | 3     | 0.1%       |
| Rødt-topp vil gi mer til de rike - blir roset           |       | 3     | 0.1%       |
| Rødt-topp vil ta mer fra de rike                        |       | 1     | 0.0%       |
| Rødt-topp vil ta mer fra de rike - blir refset          |       | 1     | 0.0%       |
| Rødt-topp: Vil avskaffe eiendomsskatten i alle norske b |       | 1     | 0.0%       |
| Rødt-topp: Vil innføre eiendomsskatt i alle norske byer |       | 3     | 0.1%       |
| Sp-politiker fordømmes etter Facebook-innlegg: «vi tren |       | 5     | 0.1%       |
| Sp-politiker får kjeft for forslag som vil redusere inn |       | 1     | 0.0%       |

# r7pad14\_headlinesRan\_6: Randomly chosen article headline nr. 6. Background variable conjunction experiment R7PAD14. Background variable conjunction experiment R7PAD14.

| Value                                                     | Label | Cases | Percentage |
|-----------------------------------------------------------|-------|-------|------------|
| Sp-politiker får kritikk etter facebook-status: «Homofi   |       | 4     | 0.1%       |
| Sp-politiker får massiv støtte - vil ikke åpne flere ol   |       | 4     | 0.1%       |
| Sp-politiker får massiv støtte - vil åpne flere oljefel   |       | 1     | 0.0%       |
| Sp-politiker får pepper for forslag: vil privatisere NS   |       | 2     | 0.0%       |
| Sp-politiker får ros etter facebook-status: «Homofile p   |       | 4     | 0.1%       |
| Sp-politiker får skryt for forslag som vil redusere inn   |       | 1     | 0.0%       |
| Sp-politiker får skryt for forslag som vil øke inntekts   |       | 3     | 0.1%       |
| Sp-politiker får skryt for forslag: vil nekte privatisere |       | 1     | 0.0%       |
| Sp-politiker får skryt for forslag: vil privatisere NSB   |       | 2     | 0.0%       |
| Sp-politiker hudflettes etter homofiendtlig lovforslag    |       | 4     | 0.1%       |
| Sp-politiker hudflettes etter homovenninglig lovforslag   |       | 2     | 0.0%       |
| Sp-politiker hudflettes: mener det ikke burde være vans   |       | 1     | 0.0%       |
| Sp-politiker hylles ? mener det er bedre med flere kult   |       | 2     | 0.0%       |
| Sp-politiker hylles ? mener det er bedre med færre kult   |       | 2     | 0.0%       |
| Sp-politiker lovpriser etter                              |       | 3     | 0.1%       |

# r7pad14\_headlinesRan\_6: Randomly chosen article headline nr. 6. Background variable conjunction experiment R7PAD14. Background variable conjunction experiment R7PAD14.

| Value                                                       | Label | Cases | Percentage |
|-------------------------------------------------------------|-------|-------|------------|
| Facebook-innlegg: «vi tren                                  |       |       |            |
| Sp-politiker lovprises etter homovennlig lovforslag         |       | 3     | 0.1%       |
| Sp-politiker lovprises: mener det burde være vanskelige     |       | 1     | 0.0%       |
| Sp-politiker lovprises: mener det ikke burde være vanskelig |       | 2     | 0.0%       |
| Sp-politiker med Facebook-innlegg: «vi trenger flere mu     |       | 1     | 0.0%       |
| Sp-politiker med Facebook-innlegg: «vi trenger ikke fle     |       | 5     | 0.1%       |
| Sp-politiker med forslag som vil redusere inntektsforsk     |       | 2     | 0.0%       |
| Sp-politiker med forslag som vil øke inntektsforskjelle     |       | 2     | 0.0%       |
| Sp-politiker med homofiendtlig lovforslag                   |       | 1     | 0.0%       |
| Sp-politiker med homovennlig lovforslag                     |       | 2     | 0.0%       |
| Sp-politiker mener alle offentlige aktiviteter ikke kan     |       | 5     | 0.1%       |
| Sp-politiker mener alle offentlige aktiviteter kan gjør     |       | 10    | 0.2%       |
| Sp-politiker mener det burde være vanskeligere for homo     |       | 1     | 0.0%       |
| Sp-politiker mener det er bedre med flere kulturer og r     |       | 1     | 0.0%       |
| Sp-politiker mener det er                                   |       | 2     | 0.0%       |

# r7pad14\_headlinesRan\_6: Randomly chosen article headline nr. 6. Background variable conjunction experiment R7PAD14. Background variable conjunction experiment R7PAD14.

| Value                                                    | Label | Cases | Percentage |
|----------------------------------------------------------|-------|-------|------------|
| bedre med færre kulturer og r                            |       |       |            |
| Sp-politiker mener flyktninger bør ha samme rett til so  |       | 5     | 0.1%       |
| Sp-politiker mener flyktninger ikke bør ha samme rett t  |       | 9     | 0.2%       |
| Sp-politiker møter massiv motstand - vil ikke åpne fler  |       | 4     | 0.1%       |
| Sp-politiker møter massiv motstand - vil åpne flere olj  |       | 4     | 0.1%       |
| Sp-politiker presenterer forslag: vil nekte privatiseri  |       | 5     | 0.1%       |
| Sp-politiker presenterer forslag: vil privatisere NSB    |       | 2     | 0.0%       |
| Sp-politiker på Facebook: «Homofile par MÅ få like rett  |       | 2     | 0.0%       |
| Sp-politiker skjelles ut ? mener det er bedre med flere  |       | 2     | 0.0%       |
| Sp-politiker vil ikke åpne flere oljefelt i nord         |       | 1     | 0.0%       |
| Sp-politiker vil åpne flere oljefelt i nord              |       | 1     | 0.0%       |
| Sp-profil blir hedret etter twittermelding ? vil stenge  |       | 6     | 0.1%       |
| Sp-profil blir hedret etter twittermelding ? vil åpne f  |       | 1     | 0.0%       |
| Sp-profil blir latterligjort etter twittermelding ? vil  |       | 4     | 0.1%       |
| Sp-profil i åpent brev: «jeg vil IKKE at flyktninger ska |       | 5     | 0.1%       |



# r7pad14\_headlinesRan\_6: Randomly chosen article headline nr. 6. Background variable conjunction experiment R7PAD14. Background variable conjunction experiment R7PAD14.

| Value                                                   | Label | Cases | Percentage |
|---------------------------------------------------------|-------|-------|------------|
| Sp-profil i åpent brev: «jeg vil at flyktinger skal få  |       | 5     | 0.1%       |
| Sp-profil lanserer forslag om flere privatskoler i Norg |       | 5     | 0.1%       |
| Sp-profil mener at kommersielle skoler bør forbys       |       | 1     | 0.0%       |
| Sp-profil mener at kommersielle skoler bør tillates     |       | 3     | 0.1%       |
| Sp-profil møter begeistring - mener at kommersielle sko |       | 4     | 0.1%       |
| Sp-profil møter begeistring for forslag om flere privat |       | 3     | 0.1%       |
| Sp-profil møter begeistring for forslag om færre privat |       | 2     | 0.0%       |
| Sp-profil møter proteststorm - mener at kommersielle sk |       | 3     | 0.1%       |
| Sp-profil møter proteststorm for forslag om flere priva |       | 3     | 0.1%       |
| Sp-profil møter proteststorm for forslag om færre priva |       | 2     | 0.0%       |
| Sp-profil på twitter: vil stenge for oljeboring i nord  |       | 1     | 0.0%       |
| Sp-profil på twitter: vil åpne for oljeboring i nord    |       | 3     | 0.1%       |
| Sp-representant refses ? vil sikre at ingen private sko |       | 1     | 0.0%       |
| Sp-representant refses ? vil åpne for at noen private s |       | 1     | 0.0%       |
| Sp-representant roses ? vil sikre                       |       | 1     | 0.0%       |

# r7pad14\_headlinesRan\_6: Randomly chosen article headline nr. 6. Background variable conjunction experiment R7PAD14. Background variable conjunction experiment R7PAD14.

| Value                                                   | Label | Cases | Percentage |
|---------------------------------------------------------|-------|-------|------------|
| at ingen private skol                                   |       |       |            |
| Sp-representant vil sikre at ingen private skoler skal  |       | 2     | 0.0%       |
| Sp-representant vil åpne for at noen private skoler ska |       | 1     | 0.0%       |
| Sp-topp kjemper for oljeboring i Lofoten                |       | 4     | 0.1%       |
| Sp-topp kjemper for oljeboring i Lofoten - møter massiv |       | 3     | 0.1%       |
| Sp-topp kjemper mot oljeboring i Lofoten                |       | 3     | 0.1%       |
| Sp-topp kjemper mot oljeboring i Lofoten - møter massiv |       | 2     | 0.0%       |
| Sp-topp mener at skattenivået burde reduseres           |       | 2     | 0.0%       |
| Sp-topp mener at skattenivået ikke burde reduseres      |       | 4     | 0.1%       |
| Sp-topp presser på for å gi NAV-penger til Syriske flyk |       | 6     | 0.1%       |
| Sp-topp truer med å ta NAV-penger fra Syriske flyktinge |       | 3     | 0.1%       |
| Sp-topp vil gi mer til de rike                          |       | 2     | 0.0%       |
| Sp-topp vil gi mer til de rike - blir refset            |       | 2     | 0.0%       |
| Sp-topp vil gi mer til de rike - blir roset             |       | 3     | 0.1%       |
| Sp-topp vil ta mer fra de rike                          |       | 2     | 0.0%       |
| Sp-topp vil ta mer fra de rike - blir refset            |       | 3     | 0.1%       |
| Sp-topp vil ta mer fra de rike - blir roset             |       | 2     | 0.0%       |
| Sp-topp: Vil avskaffe                                   |       | 5     | 0.1%       |

# r7pad14\_headlinesRan\_6: Randomly chosen article headline nr. 6. Background variable conjunction experiment R7PAD14. Background variable conjunction experiment R7PAD14.

| Value                                                   | Label | Cases | Percentage |
|---------------------------------------------------------|-------|-------|------------|
| eiendomsskatten i alle norske byer                      |       |       |            |
| Sp-topp: Vil innføre eiendomsskatt i alle norske byer.  |       | 2     | 0.0%       |
| Stjernespiller kampklar til morgendagens kamp           |       | 10    | 0.2%       |
| Stjernespiller snakker om morgendagens kamp             |       | 17    | 0.4%       |
| Stjernespiller ute med skade til morgendagens kamp      |       | 17    | 0.4%       |
| Stormer mot Ap-topp: Vil innføre eiendomsskatt i alle n |       | 3     | 0.1%       |
| Stormer mot Frp-topp: Vil avskaffe eiendomsskatten i al |       | 2     | 0.0%       |
| Stormer mot Frp-topp: Vil innføre eiendomsskatt i alle  |       | 1     | 0.0%       |
| Stormer mot Høyre-topp: Vil avskaffe eiendomsskatten i  |       | 5     | 0.1%       |
| Stormer mot Høyre-topp: Vil innføre eiendomsskatt i all |       | 5     | 0.1%       |
| Stormer mot Krf-topp: Vil avskaffe eiendomsskatten i al |       | 4     | 0.1%       |
| Stormer mot Krf-topp: Vil innføre eiendomsskatt i alle  |       | 2     | 0.0%       |
| Stormer mot Mdg-topp: Vil avskaffe eiendomsskatten i al |       | 3     | 0.1%       |
| Stormer mot Mdg-topp:                                   |       | 2     | 0.0%       |

# r7pad14\_headlinesRan\_6: Randomly chosen article headline nr. 6. Background variable conjunction experiment R7PAD14. Background variable conjunction experiment R7PAD14.

| Value                                                   | Label | Cases | Percentage |
|---------------------------------------------------------|-------|-------|------------|
| Vil innføre eiendomsskatt i alle                        |       |       |            |
| Stormer mot Rødt-topp: Vil avskaffe eiendomsskatten i a |       | 2     | 0.0%       |
| Stormer mot Rødt-topp: Vil innføre eiendomsskatt i alle |       | 3     | 0.1%       |
| Stormer mot Sp-topp: Vil avskaffe eiendomsskatten i all |       | 2     | 0.0%       |
| Stormer mot Sv-topp: Vil avskaffe eiendomsskatten i all |       | 2     | 0.0%       |
| Stormer mot Sv-topp: Vil innføre eiendomsskatt i alle n |       | 4     | 0.1%       |
| Stormer mot Venstre-topp: Vil avskaffe eiendomsskatten  |       | 4     | 0.1%       |
| Stormer mot Venstre-topp: Vil innføre eiendomsskatt i a |       | 1     | 0.0%       |
| Suksesshistoriene om høstens treningstrend              |       | 15    | 0.3%       |
| Sv-politiker fordømmes etter Facebook-innlegg: «vi tren |       | 3     | 0.1%       |
| Sv-politiker får kjeft for forslag som vil redusere inn |       | 1     | 0.0%       |
| Sv-politiker får kjeft for forslag som vil øke inntekts |       | 1     | 0.0%       |
| Sv-politiker får kritikk etter facebook-status: «Homofi |       | 3     | 0.1%       |
| Sv-politiker får massiv støtte - vil ikke åpne flere ol |       | 3     | 0.1%       |

# r7pad14\_headlinesRan\_6: Randomly chosen article headline nr. 6. Background variable conjunction experiment R7PAD14. Background variable conjunction experiment R7PAD14.

| Value                                                   | Label | Cases | Percentage |
|---------------------------------------------------------|-------|-------|------------|
| Sv-politiker får massiv støtte - vil åpne flere oljefel |       | 2     | 0.0%       |
| Sv-politiker får pepper for forslag: vil nekte privatis |       | 5     | 0.1%       |
| Sv-politiker får pepper for forslag: vil privatisere NS |       | 2     | 0.0%       |
| Sv-politiker får ros etter facebook-status: «Homofile p |       | 4     | 0.1%       |
| Sv-politiker får skryt for forslag som vil redusere inn |       | 3     | 0.1%       |
| Sv-politiker får skryt for forslag som vil øke inntekts |       | 2     | 0.0%       |
| Sv-politiker får skryt for forslag: vil nekte privatis  |       | 3     | 0.1%       |
| Sv-politiker får skryt for forslag: vil privatisere NSB |       | 1     | 0.0%       |
| Sv-politiker hudflettes etter homofiendtlig lovforslag  |       | 1     | 0.0%       |
| Sv-politiker hudflettes etter homovennlig lovforslag    |       | 1     | 0.0%       |
| Sv-politiker hudflettes: mener det burde være vanskelig |       | 2     | 0.0%       |
| Sv-politiker hudflettes: mener det ikke burde være vans |       | 4     | 0.1%       |
| Sv-politiker hylles ? mener det er bedre med flere kult |       | 4     | 0.1%       |
| Sv-politiker lovprises etter Facebook-innlegg: «vi tren |       | 8     | 0.2%       |
| Sv-politiker lovprises etter                            |       | 3     | 0.1%       |

# r7pad14\_headlinesRan\_6: Randomly chosen article headline nr. 6. Background variable conjunction experiment R7PAD14. Background variable conjunction experiment R7PAD14.

| Value                                                                | Label | Cases | Percentage |
|----------------------------------------------------------------------|-------|-------|------------|
| homovennlig<br>lovforslag                                            |       |       |            |
| Sv-politiker<br>lovprises: mener<br>det burde være<br>vanskelige     |       | 2     | 0.0%       |
| Sv-politiker<br>lovprises: mener<br>det ikke burde<br>være vanskelig |       | 4     | 0.1%       |
| Sv-politiker<br>med Facebook-<br>innlegg: «vi<br>trenger flere mu    |       | 2     | 0.0%       |
| Sv-politiker<br>med Facebook-<br>innlegg: «vi<br>trenger ikke fle    |       | 1     | 0.0%       |
| Sv-politiker<br>med forslag<br>som vil redusere<br>inntektsforsk     |       | 3     | 0.1%       |
| Sv-politiker<br>med forslag<br>som vil øke<br>inntektsforskjelle     |       | 3     | 0.1%       |
| Sv-politiker med<br>homofientlig<br>lovforslag                       |       | 1     | 0.0%       |
| Sv-politiker med<br>homovennlig<br>lovforslag                        |       | 5     | 0.1%       |
| Sv-politiker<br>mener alle<br>offentlige<br>aktiviteter ikke<br>kan  |       | 6     | 0.1%       |
| Sv-politiker<br>mener alle<br>offentlige<br>aktiviteter kan<br>gjør  |       | 1     | 0.0%       |
| Sv-politiker<br>mener det<br>burde være<br>vanskeligere for<br>homo  |       | 2     | 0.0%       |
| Sv-politiker<br>mener det er<br>bedre med flere<br>kulturer og r     |       | 3     | 0.1%       |
| Sv-politiker<br>mener det er<br>bedre med færre<br>kulturer og r     |       | 1     | 0.0%       |
| Sv-politiker<br>mener<br>flyktninger bør                             |       | 5     | 0.1%       |

# r7pad14\_headlinesRan\_6: Randomly chosen article headline nr. 6. Background variable conjunction experiment R7PAD14. Background variable conjunction experiment R7PAD14.

| Value                                                    | Label | Cases | Percentage |
|----------------------------------------------------------|-------|-------|------------|
| ha samme rett til so                                     |       |       |            |
| Sv-politiker mener flyktninger ikke bør ha samme rett t  |       | 5     | 0.1%       |
| Sv-politiker møter massiv motstand - vil ikke åpne fler  |       | 2     | 0.0%       |
| Sv-politiker møter massiv motstand - vil åpne flere olj  |       | 2     | 0.0%       |
| Sv-politiker presenterer forslag: vil nekte privatiseri  |       | 6     | 0.1%       |
| Sv-politiker på Facebook: «Homofile par MÅ IKKE få like  |       | 1     | 0.0%       |
| Sv-politiker på Facebook: «Homofile par MÅ få like rett  |       | 3     | 0.1%       |
| Sv-politiker skjelles ut ? mener det er bedre med færre  |       | 2     | 0.0%       |
| Sv-politiker vil ikke åpne flere oljefelt i nord         |       | 3     | 0.1%       |
| Sv-profil blir hedret etter twittermelding ? vil stenge  |       | 5     | 0.1%       |
| Sv-profil blir hedret etter twittermelding ? vil åpne f  |       | 4     | 0.1%       |
| Sv-profil blir latterliggjort etter twittermelding ? vil |       | 3     | 0.1%       |
| Sv-profil i åpent brev: «jeg vil IKKE at flyktinger ska  |       | 6     | 0.1%       |
| Sv-profil i åpent brev: «jeg vil at flyktinger skal få   |       | 4     | 0.1%       |
| Sv-profil lanserer forslag om færre                      |       | 1     | 0.0%       |

# r7pad14\_headlinesRan\_6: Randomly chosen article headline nr. 6. Background variable conjunction experiment R7PAD14. Background variable conjunction experiment R7PAD14.

| Value                                                   | Label | Cases | Percentage |
|---------------------------------------------------------|-------|-------|------------|
| privatskoler i Norg                                     |       |       |            |
| Sv-profil mener at kommersielle skoler bør forbys       |       | 3     | 0.1%       |
| Sv-profil mener at kommersielle skoler bør tillates     |       | 1     | 0.0%       |
| Sv-profil møter begeistring - mener at kommersielle sko |       | 4     | 0.1%       |
| Sv-profil møter begeistring for forslag om flere privat |       | 1     | 0.0%       |
| Sv-profil møter begeistring for forslag om færre privat |       | 4     | 0.1%       |
| Sv-profil møter proteststorm - mener at kommersielle sk |       | 3     | 0.1%       |
| Sv-profil møter proteststorm for forslag om flere priva |       | 5     | 0.1%       |
| Sv-profil møter proteststorm for forslag om færre priva |       | 4     | 0.1%       |
| Sv-profil på twitter: vil stenge for oljeboring i nord  |       | 1     | 0.0%       |
| Sv-profil på twitter: vil åpne for oljeboring i nord    |       | 1     | 0.0%       |
| Sv-representant refses ? vil sikre at ingen private sko |       | 1     | 0.0%       |
| Sv-representant refses ? vil åpne for at noen private s |       | 3     | 0.1%       |
| Sv-representant roses ? vil sikre at ingen private skol |       | 1     | 0.0%       |
| Sv-representant roses ? vil åpne for at noen private sk |       | 4     | 0.1%       |



**# r7pad14\_headlinesRan\_6: Randomly chosen article headline nr. 6. Background variable conjunction experiment R7PAD14. Background variable conjunction experiment R7PAD14.**

| Value                                                   | Label | Cases | Percentage |
|---------------------------------------------------------|-------|-------|------------|
| Sv-representant vil sikre at ingen private skoler skal  |       | 8     | 0.2%       |
| Sv-representant vil åpne for at noen private skoler ska |       | 2     | 0.0%       |
| Sv-topp kjemper for oljeboring i Lofoten                |       | 2     | 0.0%       |
| Sv-topp kjemper for oljeboring i Lofoten - får massiv s |       | 1     | 0.0%       |
| Sv-topp kjemper for oljeboring i Lofoten - møter massiv |       | 6     | 0.1%       |
| Sv-topp kjemper mot oljeboring i Lofoten                |       | 3     | 0.1%       |
| Sv-topp kjemper mot oljeboring i Lofoten - får massiv s |       | 4     | 0.1%       |
| Sv-topp kjemper mot oljeboring i Lofoten - møter massiv |       | 4     | 0.1%       |
| Sv-topp mener at skattenivået burde reduseres           |       | 1     | 0.0%       |
| Sv-topp mener at skattenivået ikke burde reduseres      |       | 1     | 0.0%       |
| Sv-topp presser på for å gi NAV-penger til Syriske flyk |       | 9     | 0.2%       |
| Sv-topp truer med å ta NAV-penger fra Syriske flyktinge |       | 5     | 0.1%       |
| Sv-topp vil gi mer til de rike                          |       | 3     | 0.1%       |
| Sv-topp vil gi mer til de rike - blir refset            |       | 1     | 0.0%       |
| Sv-topp vil ta mer fra de rike                          |       | 4     | 0.1%       |
| Sv-topp vil ta mer fra de rike - blir refset            |       | 1     | 0.0%       |
| Sv-topp vil ta mer fra de rike - blir roset             |       | 2     | 0.0%       |

# r7pad14\_headlinesRan\_6: Randomly chosen article headline nr. 6. Background variable conjunction experiment R7PAD14. Background variable conjunction experiment R7PAD14.

| Value                                                             | Label | Cases | Percentage |
|-------------------------------------------------------------------|-------|-------|------------|
| Sv-topp:<br>Vil avskaffe<br>eiendomsskatten<br>i alle norske byer |       | 3     | 0.1%       |
| Sv-topp:<br>Vil innføre<br>eiendomsskatt i<br>alle norske byer.   |       | 2     | 0.0%       |
| TV-profiler<br>gifter seg                                         |       | 18    | 0.4%       |
| TV-profiler<br>skiller seg                                        |       | 20    | 0.4%       |
| TV-profiler<br>snakker om livet<br>sammen                         |       | 15    | 0.3%       |
| Tror Norge<br>spiller uavgjort<br>i morgendagens<br>fotballkamp   |       | 19    | 0.4%       |
| Tror Norge taper<br>i morgendagens<br>fotballkamp                 |       | 17    | 0.4%       |
| Tror Norge<br>vinner i<br>morgendagens<br>fotballkamp             |       | 15    | 0.3%       |
| Venstre-politiker<br>fordømmes<br>etter Facebook-<br>innlegg: «vi |       | 3     | 0.1%       |
| Venstre-politiker<br>får kjeft for<br>forslag som vil<br>reduser  |       | 1     | 0.0%       |
| Venstre-politiker<br>får kjeft for<br>forslag som vil<br>øke inn  |       | 3     | 0.1%       |
| Venstre-politiker<br>får kritikk etter<br>facebook-status:<br>«H  |       | 6     | 0.1%       |
| Venstre-politiker<br>får massiv støtte<br>- vil ikke åpne<br>fle  |       | 2     | 0.0%       |
| Venstre-politiker<br>får pepper for<br>forslag: vil nekte<br>pri  |       | 1     | 0.0%       |
| Venstre-politiker<br>får pepper for<br>forslag: vil<br>privatise  |       | 3     | 0.1%       |
| Venstre-politiker<br>får ros etter<br>facebook-status:<br>«Homof  |       | 4     | 0.1%       |

# r7pad14\_headlinesRan\_6: Randomly chosen article headline nr. 6. Background variable conjunction experiment R7PAD14. Background variable conjunction experiment R7PAD14.

| Value                                                   | Label | Cases | Percentage |
|---------------------------------------------------------|-------|-------|------------|
| Venstre-politiker får skryt for forslag som vil reduser |       | 2     | 0.0%       |
| Venstre-politiker får skryt for forslag som vil øke inn |       | 1     | 0.0%       |
| Venstre-politiker får skryt for forslag: vil nekte priv |       | 3     | 0.1%       |
| Venstre-politiker får skryt for forslag: vil privatiser |       | 4     | 0.1%       |
| Venstre-politiker hudflettes etter homofiendtlig lovfor |       | 2     | 0.0%       |
| Venstre-politiker hudflettes etter homovennlig lovforsl |       | 2     | 0.0%       |
| Venstre-politiker hudflettes: mener det burde være vans |       | 1     | 0.0%       |
| Venstre-politiker hudflettes: mener det ikke burde være |       | 3     | 0.1%       |
| Venstre-politiker hylles ? mener det er bedre med flere |       | 1     | 0.0%       |
| Venstre-politiker lovprises etter Facebook-innlegg: «vi |       | 4     | 0.1%       |
| Venstre-politiker lovprises etter homofiendtlig lovfors |       | 1     | 0.0%       |
| Venstre-politiker lovprises etter homovennlig lovforsla |       | 4     | 0.1%       |
| Venstre-politiker lovprises: mener det burde være vansk |       | 2     | 0.0%       |
| Venstre-politiker lovprises: mener det ikke burde være  |       | 1     | 0.0%       |
| Venstre-politiker med Facebook-                         |       | 4     | 0.1%       |

# r7pad14\_headlinesRan\_6: Randomly chosen article headline nr. 6. Background variable conjunction experiment R7PAD14. Background variable conjunction experiment R7PAD14.

| Value                                                   | Label | Cases | Percentage |
|---------------------------------------------------------|-------|-------|------------|
| innlegg: «vi trenger fle                                |       |       |            |
| Venstre-politiker med Facebook-innlegg: «vi trenger ikk |       | 3     | 0.1%       |
| Venstre-politiker med forslag som vil redusere inntekts |       | 5     | 0.1%       |
| Venstre-politiker med forslag som vil øke inntektsforsk |       | 3     | 0.1%       |
| Venstre-politiker med homofiendtlig lovforslag          |       | 5     | 0.1%       |
| Venstre-politiker med homovennlig lovforslag            |       | 1     | 0.0%       |
| Venstre-politiker mener alle offentlige aktiviteter ikk |       | 4     | 0.1%       |
| Venstre-politiker mener alle offentlige aktiviteter kan |       | 5     | 0.1%       |
| Venstre-politiker mener det burde være vanskeligere for |       | 2     | 0.0%       |
| Venstre-politiker mener det er bedre med flere kulturer |       | 1     | 0.0%       |
| Venstre-politiker mener det er bedre med færre kulturer |       | 1     | 0.0%       |
| Venstre-politiker mener flyktninger bør ha samme rett t |       | 3     | 0.1%       |
| Venstre-politiker mener flyktninger ikke bør ha samme r |       | 10    | 0.2%       |
| Venstre-politiker møter massiv motstand - vil åpne fler |       | 3     | 0.1%       |
| Venstre-politiker presenterer forslag: vil nekte privat |       | 1     | 0.0%       |

**# r7pad14\_headlinesRan\_6: Randomly chosen article headline nr. 6. Background variable conjunction experiment R7PAD14.Background variable conjunction experiment R7PAD14.**

| Value                                                   | Label | Cases | Percentage |
|---------------------------------------------------------|-------|-------|------------|
| Venstre-politiker presenterer forslag: vil privatisere  |       | 1     | 0.0%       |
| Venstre-politiker på Facebook: «Homofile par MÅ IKKE få |       | 3     | 0.1%       |
| Venstre-politiker på Facebook: «Homofile par MÅ få like |       | 1     | 0.0%       |
| Venstre-politiker skjelles ut ? mener det er bedre med  |       | 2     | 0.0%       |
| Venstre-politiker vil åpne flere oljefelt i nord        |       | 2     | 0.0%       |
| Venstre-profil blir hedret etter twittermelding ? vil å |       | 1     | 0.0%       |
| Venstre-profil blir latterligjort etter twittermelding  |       | 4     | 0.1%       |
| Venstre-profil i åpent brev: «jeg vil IKKE at flyktinge |       | 8     | 0.2%       |
| Venstre-profil i åpent brev: «jeg vil at flyktinger ska |       | 6     | 0.1%       |
| Venstre-profil lanserer forslag om flere privatskoler i |       | 3     | 0.1%       |
| Venstre-profil lanserer forslag om færre privatskoler i |       | 5     | 0.1%       |
| Venstre-profil mener at kommersielle skoler bør forbys  |       | 1     | 0.0%       |
| Venstre-profil mener at kommersielle skoler bør tillate |       | 1     | 0.0%       |
| Venstre-profil møter begeistring - mener at kommersiell |       | 3     | 0.1%       |
| Venstre-profil møter                                    |       | 2     | 0.0%       |

# r7pad14\_headlinesRan\_6: Randomly chosen article headline nr. 6. Background variable conjunction experiment R7PAD14. Background variable conjunction experiment R7PAD14.

| Value                                                   | Label | Cases | Percentage |
|---------------------------------------------------------|-------|-------|------------|
| begeistring for forslag om flere p                      |       |       |            |
| Venstre-profil møter begeistring for forslag om færre p |       | 6     | 0.1%       |
| Venstre-profil møter proteststorm - mener at kommersiel |       | 7     | 0.1%       |
| Venstre-profil møter proteststorm for forslag om flere  |       | 1     | 0.0%       |
| Venstre-profil møter proteststorm for forslag om færre  |       | 2     | 0.0%       |
| Venstre-profil på twitter: vil stenge for oljeboring i  |       | 2     | 0.0%       |
| Venstre-profil på twitter: vil åpne for oljeboring i no |       | 1     | 0.0%       |
| Venstre-representant refses ? vil sikre at ingen privat |       | 1     | 0.0%       |
| Venstre-representant refses ? vil åpne for at noen priv |       | 3     | 0.1%       |
| Venstre-representant roses ? vil sikre at ingen private |       | 5     | 0.1%       |
| Venstre-representant roses ? vil åpne for at noen priva |       | 1     | 0.0%       |
| Venstre-representant vil sikre at ingen private skoler  |       | 1     | 0.0%       |
| Venstre-representant vil åpne for at noen private skole |       | 1     | 0.0%       |
| Venstre-topp kjemper for oljeboring i Lofoten - får mas |       | 2     | 0.0%       |

# r7pad14\_headlinesRan\_6: Randomly chosen article headline nr. 6. Background variable conjunction experiment R7PAD14. Background variable conjunction experiment R7PAD14.

| Value                                                   | Label | Cases | Percentage |
|---------------------------------------------------------|-------|-------|------------|
| Venstre-topp kjemper mot oljeboring i Lofoten           |       | 3     | 0.1%       |
| Venstre-topp kjemper mot oljeboring i Lofoten - får mas |       | 2     | 0.0%       |
| Venstre-topp mener at skattenivået burde reduseres      |       | 4     | 0.1%       |
| Venstre-topp mener at skattenivået ikke burde reduseres |       | 5     | 0.1%       |
| Venstre-topp presser på for å gi NAV-penger til Syriske |       | 7     | 0.1%       |
| Venstre-topp truer med å ta NAV-penger fra Syriske flyk |       | 9     | 0.2%       |
| Venstre-topp vil gi mer til de rike - blir refset       |       | 1     | 0.0%       |
| Venstre-topp vil gi mer til de rike - blir roset        |       | 3     | 0.1%       |
| Venstre-topp vil ta mer fra de rike                     |       | 4     | 0.1%       |
| Venstre-topp vil ta mer fra de rike - blir refset       |       | 2     | 0.0%       |
| Venstre-topp vil ta mer fra de rike - blir roset        |       | 3     | 0.1%       |
| Venstre-topp: Vil innføre eiendomsskatt i alle norske b |       | 1     | 0.0%       |

Warning: these figures indicate the number of cases found in the data file. They cannot be interpreted as summary statistics of the population of interest.

# r7selexp2\_selections: The number of articles the respondent can select. Background variable conjunction experiment R7PAD14.

| <b>Information</b>                | [Type= discrete] [Format=numeric] [Range= 1-3] [Missing=*]                              |       |            |
|-----------------------------------|-----------------------------------------------------------------------------------------|-------|------------|
| <b>Statistics [NW/ W]</b>         | [Valid=4659 /-] [Invalid=30 /-]                                                         |       |            |
| <b>Interviewer's instructions</b> | [Randomly selects, between 1 and 3, how many news articles the respondent may choose. ] |       |            |
| Value                             | Label                                                                                   | Cases | Percentage |
| 1                                 | 1 selection                                                                             | 1516  | 32.5%      |
| 2                                 | 2 selections                                                                            | 1566  | 33.6%      |
| 3                                 | 3 selections                                                                            | 1577  | 33.8%      |

**# r7selexp2\_selections: The number of articles the respondent can select. Background variable conjunction experiment R7PAD14.**

| Value   | Label | Cases | Percentage |
|---------|-------|-------|------------|
| Sysmiss |       | 30    |            |

*Warning: these figures indicate the number of cases found in the data file. They cannot be interpreted as summary statistics of the population of interest.*

**# r7selexp2\_sources01: Dichotomy whether the articles should be listed with sources, or not. Background variable conjunction experiment R7PAD14.**

|                                   |                                                                               |
|-----------------------------------|-------------------------------------------------------------------------------|
| <b>Information</b>                | [Type= discrete] [Format=numeric] [Range= 0-1] [Missing=*]                    |
| <b>Statistics [NW/ W]</b>         | [Valid=4659 /-] [Invalid=30 /-]                                               |
| <b>Interviewer's instructions</b> | [Randomly decides whether the articles should be listed with source or not. ] |

| Value   | Label | Cases | Percentage |
|---------|-------|-------|------------|
| 0       | No    | 2339  | 50.2%      |
| 1       | Yes   | 2320  | 49.8%      |
| Sysmiss |       | 30    |            |

*Warning: these figures indicate the number of cases found in the data file. They cannot be interpreted as summary statistics of the population of interest.*

**# r7selexp2\_sourcesRan\_1: Randomly chosen source nr. 1. Background variable conjunction experiment R7PAD14.**

|                                   |                                                 |
|-----------------------------------|-------------------------------------------------|
| <b>Information</b>                | [Type= discrete] [Format=character] [Missing=*] |
| <b>Statistics [NW/ W]</b>         | [Valid=4689 /-] [Invalid=0 /-]                  |
| <b>Interviewer's instructions</b> | [If sources are to be listed: source nr. 1]     |

| Value             | Label | Cases | Percentage |
|-------------------|-------|-------|------------|
|                   |       | 2369  | 50.5%      |
| Aftenposten       |       | 326   | 7.0%       |
| Dagbladet         |       | 307   | 6.5%       |
| Dagens Næringsliv |       | 341   | 7.3%       |
| Klassekampen      |       | 302   | 6.4%       |
| NRK               |       | 327   | 7.0%       |
| TV2               |       | 358   | 7.6%       |
| VG                |       | 359   | 7.7%       |

*Warning: these figures indicate the number of cases found in the data file. They cannot be interpreted as summary statistics of the population of interest.*

**# r7selexp2\_sourcesRan\_2: Randomly chosen source nr. 2. Background variable conjunction experiment R7PAD14.**

|                                   |                                                 |
|-----------------------------------|-------------------------------------------------|
| <b>Information</b>                | [Type= discrete] [Format=character] [Missing=*] |
| <b>Statistics [NW/ W]</b>         | [Valid=4689 /-] [Invalid=0 /-]                  |
| <b>Interviewer's instructions</b> | [If sources are to be listed: source nr. 2]     |

| Value             | Label | Cases | Percentage |
|-------------------|-------|-------|------------|
|                   |       | 2369  | 50.5%      |
| Aftenposten       |       | 317   | 6.8%       |
| Dagbladet         |       | 324   | 6.9%       |
| Dagens Næringsliv |       | 352   | 7.5%       |
| Klassekampen      |       | 323   | 6.9%       |
| NRK               |       | 326   | 7.0%       |
| TV2               |       | 350   | 7.5%       |
| VG                |       | 328   | 7.0%       |

*Warning: these figures indicate the number of cases found in the data file. They cannot be interpreted as summary statistics of the population of interest.*



| # r7selexp2_sourcesRan_3: Randomly chosen source nr. 3. Background variable conjunction experiment R7PAD14.                                                                                           |                             |                                                                                                                 |                              |       |
|-------------------------------------------------------------------------------------------------------------------------------------------------------------------------------------------------------|-----------------------------|-----------------------------------------------------------------------------------------------------------------|------------------------------|-------|
| Information                                                                                                                                                                                           |                             | [Type= discrete] [Format=character] [Missing=*]                                                                 |                              |       |
| Statistics [NW/ W]                                                                                                                                                                                    |                             | [Valid=4689 /-] [Invalid=0 /-]                                                                                  |                              |       |
| Interviewer's instructions                                                                                                                                                                            |                             | [If sources are to be listed: source nr. 3]                                                                     |                              |       |
| Value                                                                                                                                                                                                 | Label                       | Cases                                                                                                           | Percentage                   |       |
|                                                                                                                                                                                                       |                             | 2369                                                                                                            | <div><div></div></div> 50.5% |       |
| Aftenposten                                                                                                                                                                                           |                             | 313                                                                                                             | <div><div></div></div>       | 6.7%  |
| Dagbladet                                                                                                                                                                                             |                             | 307                                                                                                             | <div><div></div></div>       | 6.5%  |
| Dagens Næringsliv                                                                                                                                                                                     |                             | 339                                                                                                             | <div><div></div></div>       | 7.2%  |
| Klassekampen                                                                                                                                                                                          |                             | 344                                                                                                             | <div><div></div></div>       | 7.3%  |
| NRK                                                                                                                                                                                                   |                             | 340                                                                                                             | <div><div></div></div>       | 7.3%  |
| TV2                                                                                                                                                                                                   |                             | 350                                                                                                             | <div><div></div></div>       | 7.5%  |
| VG                                                                                                                                                                                                    |                             | 327                                                                                                             | <div><div></div></div>       | 7.0%  |
| Warning: these figures indicate the number of cases found in the data file. They cannot be interpreted as summary statistics of the population of interest.                                           |                             |                                                                                                                 |                              |       |
| # r7selexp2_sourcesRan_4: Randomly chosen source nr. 4. Background variable conjunction experiment R7PAD14.                                                                                           |                             |                                                                                                                 |                              |       |
| Information                                                                                                                                                                                           |                             | [Type= discrete] [Format=character] [Missing=*]                                                                 |                              |       |
| Statistics [NW/ W]                                                                                                                                                                                    |                             | [Valid=4689 /-] [Invalid=0 /-]                                                                                  |                              |       |
| Interviewer's instructions                                                                                                                                                                            |                             | [If sources are to be listed: source nr. 4]                                                                     |                              |       |
| Value                                                                                                                                                                                                 | Label                       | Cases                                                                                                           | Percentage                   |       |
|                                                                                                                                                                                                       |                             | 2369                                                                                                            | <div><div></div></div> 50.5% |       |
| Aftenposten                                                                                                                                                                                           |                             | 302                                                                                                             | <div><div></div></div>       | 6.4%  |
| Dagbladet                                                                                                                                                                                             |                             | 351                                                                                                             | <div><div></div></div>       | 7.5%  |
| Dagens Næringsliv                                                                                                                                                                                     |                             | 346                                                                                                             | <div><div></div></div>       | 7.4%  |
| Klassekampen                                                                                                                                                                                          |                             | 326                                                                                                             | <div><div></div></div>       | 7.0%  |
| NRK                                                                                                                                                                                                   |                             | 316                                                                                                             | <div><div></div></div>       | 6.7%  |
| TV2                                                                                                                                                                                                   |                             | 363                                                                                                             | <div><div></div></div>       | 7.7%  |
| VG                                                                                                                                                                                                    |                             | 316                                                                                                             | <div><div></div></div>       | 6.7%  |
| Warning: these figures indicate the number of cases found in the data file. They cannot be interpreted as summary statistics of the population of interest.                                           |                             |                                                                                                                 |                              |       |
| # r7selexp2_valanceandparty: Randomly decides whether the article headlines should appear with party and valence, or any combination of the two. Background variable conjunction experiment R7selexp2 |                             |                                                                                                                 |                              |       |
| Information                                                                                                                                                                                           |                             | [Type= discrete] [Format=numeric] [Range= 1-4] [Missing=*]                                                      |                              |       |
| Statistics [NW/ W]                                                                                                                                                                                    |                             | [Valid=4659 /-] [Invalid=30 /-]                                                                                 |                              |       |
| Interviewer's instructions                                                                                                                                                                            |                             | [Randomly decides whether the respondent will be exposed to valance and party, or any combination of the two. ] |                              |       |
| Notes                                                                                                                                                                                                 |                             | Dikotom hvorvidt respondenten får overskrifter med valør og parti, og øvrige kombinasjoner.                     |                              |       |
| Value                                                                                                                                                                                                 | Label                       | Cases                                                                                                           | Percentage                   |       |
| 1                                                                                                                                                                                                     | With party and valence      | 1184                                                                                                            | <div><div></div></div>       | 25.4% |
| 2                                                                                                                                                                                                     | With party, without valence | 1195                                                                                                            | <div><div></div></div>       | 25.6% |
| 3                                                                                                                                                                                                     | Without party, with valence | 1118                                                                                                            | <div><div></div></div>       | 24.0% |
| 4                                                                                                                                                                                                     | Without party and valence   | 1162                                                                                                            | <div><div></div></div>       | 24.9% |
| Sysmiss                                                                                                                                                                                               |                             | 30                                                                                                              |                              |       |
| Warning: these figures indicate the number of cases found in the data file. They cannot be interpreted as summary statistics of the population of interest.                                           |                             |                                                                                                                 |                              |       |

|                                                                                                                                                             |                                                                                                                                                                                                                                                                                                                                                                                                                                                                                                                        |       |                   |
|-------------------------------------------------------------------------------------------------------------------------------------------------------------|------------------------------------------------------------------------------------------------------------------------------------------------------------------------------------------------------------------------------------------------------------------------------------------------------------------------------------------------------------------------------------------------------------------------------------------------------------------------------------------------------------------------|-------|-------------------|
| # r7selexp2_headlinesRan_1: Randomly chosen article headline nr. 1. Background variable conjunction experiment R7PAD14.                                     |                                                                                                                                                                                                                                                                                                                                                                                                                                                                                                                        |       |                   |
| Information                                                                                                                                                 | [Type= discrete] [Format=character] [Missing=*]                                                                                                                                                                                                                                                                                                                                                                                                                                                                        |       |                   |
| Statistics [NW/ W]                                                                                                                                          | [Valid=4689 /-] [Invalid=0 /-]                                                                                                                                                                                                                                                                                                                                                                                                                                                                                         |       |                   |
| Interviewer's instructions                                                                                                                                  | [Stores a randomly selected news article from a large population of articles. Contact Sveinung Arnesen or Mikael Johannesson for the complete list. ]                                                                                                                                                                                                                                                                                                                                                                  |       |                   |
| # r7selexp2_headlinesRan_2: Randomly chosen article headline nr. 2. Background variable conjunction experiment R7PAD14.                                     |                                                                                                                                                                                                                                                                                                                                                                                                                                                                                                                        |       |                   |
| Information                                                                                                                                                 | [Type= discrete] [Format=character] [Missing=*]                                                                                                                                                                                                                                                                                                                                                                                                                                                                        |       |                   |
| Statistics [NW/ W]                                                                                                                                          | [Valid=4689 /-] [Invalid=0 /-]                                                                                                                                                                                                                                                                                                                                                                                                                                                                                         |       |                   |
| Interviewer's instructions                                                                                                                                  | [Stores a randomly selected news article from a large population of articles. Contact Sveinung Arnesen or Mikael Johannesson for the complete list. ]                                                                                                                                                                                                                                                                                                                                                                  |       |                   |
| # r7selexp2_headlinesRan_3: Randomly chosen article headline nr. 3. Background variable conjunction experiment R7PAD14.                                     |                                                                                                                                                                                                                                                                                                                                                                                                                                                                                                                        |       |                   |
| Information                                                                                                                                                 | [Type= discrete] [Format=character] [Missing=*]                                                                                                                                                                                                                                                                                                                                                                                                                                                                        |       |                   |
| Statistics [NW/ W]                                                                                                                                          | [Valid=4689 /-] [Invalid=0 /-]                                                                                                                                                                                                                                                                                                                                                                                                                                                                                         |       |                   |
| Interviewer's instructions                                                                                                                                  | [Stores a randomly selected news article from a large population of articles. Contact Sveinung Arnesen or Mikael Johannesson for the complete list. ]                                                                                                                                                                                                                                                                                                                                                                  |       |                   |
| # r7selexp2_headlinesRan_4: Randomly chosen article headline nr. 4. Background variable conjunction experiment R7PAD14.                                     |                                                                                                                                                                                                                                                                                                                                                                                                                                                                                                                        |       |                   |
| Information                                                                                                                                                 | [Type= discrete] [Format=character] [Missing=*]                                                                                                                                                                                                                                                                                                                                                                                                                                                                        |       |                   |
| Statistics [NW/ W]                                                                                                                                          | [Valid=4689 /-] [Invalid=0 /-]                                                                                                                                                                                                                                                                                                                                                                                                                                                                                         |       |                   |
| Interviewer's instructions                                                                                                                                  | [Stores a randomly selected news article from a large population of articles. Contact Sveinung Arnesen or Mikael Johannesson for the complete list. ]                                                                                                                                                                                                                                                                                                                                                                  |       |                   |
| # r7pad14_4rows_1: Article 1. List of randomly selected articles by which the respondent has to pick which ones to read. Conjunction experiment.            |                                                                                                                                                                                                                                                                                                                                                                                                                                                                                                                        |       |                   |
| Information                                                                                                                                                 | [Type= discrete] [Format=numeric] [Range= 1-1] [Missing=*]                                                                                                                                                                                                                                                                                                                                                                                                                                                             |       |                   |
| Statistics [NW/ W]                                                                                                                                          | [Valid=4689 /-] [Invalid=0 /-]                                                                                                                                                                                                                                                                                                                                                                                                                                                                                         |       |                   |
| Pre-question                                                                                                                                                | We wish to study what media items people read. Below you will find some imaginary items similar to those you may find in Norwegian online newspapers. Please read all the headlines carefully and imagine that this is real.                                                                                                                                                                                                                                                                                           |       |                   |
| Literal question                                                                                                                                            | If you had to read [1 article /2 articles /3 articles], which [article /articles] would you have preferred to spend your time by?<br><br>[Here follows a list of randomly chosen articles. See background variables]                                                                                                                                                                                                                                                                                                   |       |                   |
| Interviewer's instructions                                                                                                                                  | [Asked if R7PAD14_version=1. Conjunction experiment. Respondents are exposed of 4 random news articles. The articles have a set of randomly drawn characteristics. R7PAD14_version randomly decides whether the respondent should be exposed of 4 articles or 6 articles. The order of which R7PAD14 and R7SELEXP2 is asked, is randomized. See R7SELEXP_order.]<br><br>[Contact Sveinung Arnesen (Sveinung.Arnese@uib.no) or Mikael Johannesson (Mikael.Johannesson@uib.no) for questions and complete documentation] |       |                   |
| Notes                                                                                                                                                       | ^f('R7PAD14_body')[1]^ (Vi ønsker å studere hvilke mediesaker folk leser. Under er noen tenkte saker vi har laget som                                                                                                                                                                                                                                                                                                                                                                                                  |       |                   |
| Value                                                                                                                                                       | Label                                                                                                                                                                                                                                                                                                                                                                                                                                                                                                                  | Cases | Percentage        |
| 0                                                                                                                                                           |                                                                                                                                                                                                                                                                                                                                                                                                                                                                                                                        | 831   | <div></div> 17.7% |
| 1                                                                                                                                                           | Article chosen by respondent                                                                                                                                                                                                                                                                                                                                                                                                                                                                                           | 743   | <div></div> 15.8% |
| 97                                                                                                                                                          | No answer                                                                                                                                                                                                                                                                                                                                                                                                                                                                                                              | 2     | 0.0%              |
| 98                                                                                                                                                          | Not asked                                                                                                                                                                                                                                                                                                                                                                                                                                                                                                              | 3113  | <div></div> 66.4% |
| Warning: these figures indicate the number of cases found in the data file. They cannot be interpreted as summary statistics of the population of interest. |                                                                                                                                                                                                                                                                                                                                                                                                                                                                                                                        |       |                   |

**# r7pad14\_4rows\_2: Article 2. List of randomly selected articles by which the respondent has to pick which ones to read. Conjunction experiment.**

|                                   |                                                                                                                                                                                                                                                                                                                                                                                                                                                                                                                        |
|-----------------------------------|------------------------------------------------------------------------------------------------------------------------------------------------------------------------------------------------------------------------------------------------------------------------------------------------------------------------------------------------------------------------------------------------------------------------------------------------------------------------------------------------------------------------|
| <b>Information</b>                | [Type= discrete] [Format=numeric] [Range= 1-1] [Missing=*]                                                                                                                                                                                                                                                                                                                                                                                                                                                             |
| <b>Statistics [NW/ W]</b>         | [Valid=4689 /-] [Invalid=0 /-]                                                                                                                                                                                                                                                                                                                                                                                                                                                                                         |
| <b>Pre-question</b>               | We wish to study what media items people read. Below you will find some imaginary items similar to those you may find in Norwegian online newspapers. Please read all the headlines carefully and imagine that this is real.                                                                                                                                                                                                                                                                                           |
| <b>Literal question</b>           | If you had to read [1 article /2 articles /3 articles], which [article /articles] would you have preferred to spend your time by?<br><br>[Here follows a list of randomly chosen articles. See background variables]                                                                                                                                                                                                                                                                                                   |
| <b>Interviewer's instructions</b> | [Asked if R7PAD14_version=1. Conjunction experiment. Respondents are exposed of 4 random news articles. The articles have a set of randomly drawn characteristics. R7PAD14_version randomly decides whether the respondent should be exposed of 4 articles or 6 articles. The order of which R7PAD14 and R7SELEXP2 is asked, is randomized. See R7SELEXP_order.]<br><br>[Contact Sveinung Arnesen (Sveinung.Arnese@uib.no) or Mikael Johannesson (Mikael.Johannesson@uib.no) for questions and complete documentation] |
| <b>Notes</b>                      | ^f('R7PAD14_body')['2']^ (Vi ønsker å studere hvilke mediesaker folk leser. Under er noen tenkte saker vi har laget som                                                                                                                                                                                                                                                                                                                                                                                                |

| Value | Label                        | Cases | Percentage |
|-------|------------------------------|-------|------------|
| 0     |                              | 803   | 17.1%      |
| 1     | Article chosen by respondent | 771   | 16.4%      |
| 97    | No answer                    | 2     | 0.0%       |
| 98    | Not asked                    | 3113  | 66.4%      |

*Warning: these figures indicate the number of cases found in the data file. They cannot be interpreted as summary statistics of the population of interest.*

**# r7pad14\_4rows\_3: Article 3. List of randomly selected articles by which the respondent has to pick which ones to read. Conjunction experiment.**

|                                   |                                                                                                                                                                                                                                                                                                                                                                                                                                                                                                                        |
|-----------------------------------|------------------------------------------------------------------------------------------------------------------------------------------------------------------------------------------------------------------------------------------------------------------------------------------------------------------------------------------------------------------------------------------------------------------------------------------------------------------------------------------------------------------------|
| <b>Information</b>                | [Type= discrete] [Format=numeric] [Range= 1-1] [Missing=*]                                                                                                                                                                                                                                                                                                                                                                                                                                                             |
| <b>Statistics [NW/ W]</b>         | [Valid=4689 /-] [Invalid=0 /-]                                                                                                                                                                                                                                                                                                                                                                                                                                                                                         |
| <b>Pre-question</b>               | We wish to study what media items people read. Below you will find some imaginary items similar to those you may find in Norwegian online newspapers. Please read all the headlines carefully and imagine that this is real.                                                                                                                                                                                                                                                                                           |
| <b>Literal question</b>           | If you had to read [1 article /2 articles /3 articles], which [article /articles] would you have preferred to spend your time by?<br><br>[Here follows a list of randomly chosen articles. See background variables]                                                                                                                                                                                                                                                                                                   |
| <b>Interviewer's instructions</b> | [Asked if R7PAD14_version=1. Conjunction experiment. Respondents are exposed of 4 random news articles. The articles have a set of randomly drawn characteristics. R7PAD14_version randomly decides whether the respondent should be exposed of 4 articles or 6 articles. The order of which R7PAD14 and R7SELEXP2 is asked, is randomized. See R7SELEXP_order.]<br><br>[Contact Sveinung Arnesen (Sveinung.Arnese@uib.no) or Mikael Johannesson (Mikael.Johannesson@uib.no) for questions and complete documentation] |
| <b>Notes</b>                      | ^f('R7PAD14_body')['3']^ (Vi ønsker å studere hvilke mediesaker folk leser. Under er noen tenkte saker vi har laget som                                                                                                                                                                                                                                                                                                                                                                                                |

| Value | Label                        | Cases | Percentage |
|-------|------------------------------|-------|------------|
| 0     |                              | 813   | 17.3%      |
| 1     | Article chosen by respondent | 761   | 16.2%      |
| 97    | No answer                    | 2     | 0.0%       |
| 98    | Not asked                    | 3113  | 66.4%      |

*Warning: these figures indicate the number of cases found in the data file. They cannot be interpreted as summary statistics of the population of interest.*

**# r7pad14\_4rows\_4: Article 4. List of randomly selected articles by which the respondent has to pick which ones to read. Conjunction experiment.**

|                           |                                                            |
|---------------------------|------------------------------------------------------------|
| <b>Information</b>        | [Type= discrete] [Format=numeric] [Range= 1-1] [Missing=*] |
| <b>Statistics [NW/ W]</b> | [Valid=4689 /-] [Invalid=0 /-]                             |

**# r7pad14\_4rows\_4: Article 4. List of randomly selected articles by which the respondent has to pick which ones to read. Conjunction experiment.**

|                                   |                                                                                                                                                                                                                                                                                                                                                                                                                                                                                                                        |
|-----------------------------------|------------------------------------------------------------------------------------------------------------------------------------------------------------------------------------------------------------------------------------------------------------------------------------------------------------------------------------------------------------------------------------------------------------------------------------------------------------------------------------------------------------------------|
| <b>Pre-question</b>               | We wish to study what media items people read. Below you will find some imaginary items similar to those you may find in Norwegian online newspapers. Please read all the headlines carefully and imagine that this is real.                                                                                                                                                                                                                                                                                           |
| <b>Literal question</b>           | If you had to read [1 article /2 articles /3 articles], which [article /articles] would you have preferred to spend your time by?<br><br>[Here follows a list of randomly chosen articles. See background variables]                                                                                                                                                                                                                                                                                                   |
| <b>Interviewer's instructions</b> | [Asked if R7PAD14_version=1. Conjunction experiment. Respondents are exposed of 4 random news articles. The articles have a set of randomly drawn characteristics. R7PAD14_version randomly decides whether the respondent should be exposed of 4 articles or 6 articles. The order of which R7PAD14 and R7SELEXP2 is asked, is randomized. See R7SELEXP_order.]<br><br>[Contact Sveinung Arnesen (Sveinung.Arnese@uib.no) or Mikael Johannesson (Mikael.Johannesson@uib.no) for questions and complete documentation] |
| <b>Notes</b>                      | ^f('R7PAD14_body')[4]^ (Vi ønsker å studere hvilke mediesaker folk leser. Under er noen tenkte saker vi har laget som                                                                                                                                                                                                                                                                                                                                                                                                  |

| Value | Label                        | Cases | Percentage |
|-------|------------------------------|-------|------------|
| 0     |                              | 768   | 16.4%      |
| 1     | Article chosen by respondent | 806   | 17.2%      |
| 97    | No answer                    | 2     | 0.0%       |
| 98    | Not asked                    | 3113  | 66.4%      |

*Warning: these figures indicate the number of cases found in the data file. They cannot be interpreted as summary statistics of the population of interest.*

**# r7pad14\_6rows\_1: Article 1. List of randomly selected articles by which the respondent has to pick which ones to read. Conjunction experiment.**

|                                   |                                                                                                                                                                                                                                                                                                                                                                                                                                                                                                                                                   |
|-----------------------------------|---------------------------------------------------------------------------------------------------------------------------------------------------------------------------------------------------------------------------------------------------------------------------------------------------------------------------------------------------------------------------------------------------------------------------------------------------------------------------------------------------------------------------------------------------|
| <b>Information</b>                | [Type= discrete] [Format=numeric] [Range= 1-1] [Missing=*]                                                                                                                                                                                                                                                                                                                                                                                                                                                                                        |
| <b>Statistics [NW/ W]</b>         | [Valid=4689 /-] [Invalid=0 /-]                                                                                                                                                                                                                                                                                                                                                                                                                                                                                                                    |
| <b>Pre-question</b>               | We wish to study what media items people read. Below you will find some imaginary items similar to those you may find in Norwegian online newspapers. Please read all the headlines carefully and imagine that this is real.                                                                                                                                                                                                                                                                                                                      |
| <b>Literal question</b>           | If you had to read [1 article /2 articles /3 articles], which [article /articles] would you have preferred to spend your time by?<br><br>[Here follows a list of randomly chosen articles. See background variables]                                                                                                                                                                                                                                                                                                                              |
| <b>Interviewer's instructions</b> | [Asked if R7PAD14_version>1. Conjunction experiment. Respondents are exposed to a set of 6 random news and entertainment articles. The articles have a set of randomly drawn characteristics. R7PAD14_version randomly decides whether the respondent should be exposed of 4 articles or 6 articles. The order of which R7PAD14 and R7SELEXP2 is asked, is randomized. See R7SELEXP_order.]<br><br>[Contact Sveinung Arnesen (Sveinung.Arnese@uib.no) or Mikael Johannesson (Mikael.Johannesson@uib.no) for questions and complete documentation] |
| <b>Notes</b>                      | ^f('R7PAD14_body')[1]^ (Vi ønsker å studere hvilke mediesaker folk leser. Under er noen tenkte saker vi har laget som                                                                                                                                                                                                                                                                                                                                                                                                                             |

| Value | Label                        | Cases | Percentage |
|-------|------------------------------|-------|------------|
| 0     |                              | 2043  | 43.6%      |
| 1     | Article chosen by respondent | 1036  | 22.1%      |
| 97    | No answer                    | 0     |            |
| 98    | Not asked                    | 1610  | 34.3%      |

*Warning: these figures indicate the number of cases found in the data file. They cannot be interpreted as summary statistics of the population of interest.*

**# r7pad14\_6rows\_2: Article 2. List of randomly selected articles by which the respondent has to pick which ones to read. Conjunction experiment.**

|                           |                                                                                                                                                                                                                              |
|---------------------------|------------------------------------------------------------------------------------------------------------------------------------------------------------------------------------------------------------------------------|
| <b>Information</b>        | [Type= discrete] [Format=numeric] [Range= 1-1] [Missing=*]                                                                                                                                                                   |
| <b>Statistics [NW/ W]</b> | [Valid=4689 /-] [Invalid=0 /-]                                                                                                                                                                                               |
| <b>Pre-question</b>       | We wish to study what media items people read. Below you will find some imaginary items similar to those you may find in Norwegian online newspapers. Please read all the headlines carefully and imagine that this is real. |
| <b>Literal question</b>   | If you had to read [1 article /2 articles /3 articles], which [article /articles] would you have preferred to spend your time by?                                                                                            |

**# r7pad14\_grows\_2: Article 2. List of randomly selected articles by which the respondent has to pick which ones to read. Conjunction experiment.**

|                                   |                                                                                                                                                                                                                                                                                                                                                                                                                                                                                                                                                             |
|-----------------------------------|-------------------------------------------------------------------------------------------------------------------------------------------------------------------------------------------------------------------------------------------------------------------------------------------------------------------------------------------------------------------------------------------------------------------------------------------------------------------------------------------------------------------------------------------------------------|
|                                   | [Here follows a list of randomly chosen articles. See background variables]                                                                                                                                                                                                                                                                                                                                                                                                                                                                                 |
| <b>Interviewer's instructions</b> | <p>[Asked if R7PAD14_version&gt;1. Conjunction experiment. Respondents are exposed to a set of 6 random news and entertainment articles. The articles have a set of randomly drawn characteristics. R7PAD14_version randomly decides whether the respondent should be exposed of 4 articles or 6 articles. The order of which R7PAD14 and R7SELEXP2 is asked, is randomized. See R7SELEXP_order.]</p> <p>[Contact Sveinung Arnesen (Sveinung.Arnese@uib.no) or Mikael Johannesson (Mikael.Johannesson@uib.no) for questions and complete documentation]</p> |
| <b>Notes</b>                      | ^f('R7PAD14_body')[2]^ (Vi ønsker å studere hvilke mediesaker folk leser. Under er noen tenkte saker vi har laget som                                                                                                                                                                                                                                                                                                                                                                                                                                       |

| Value | Label                        | Cases | Percentage |
|-------|------------------------------|-------|------------|
| 0     |                              | 2112  | 45.0%      |
| 1     | Article chosen by respondent | 967   | 20.6%      |
| 97    | No answer                    | 4     | 0.1%       |
| 98    | Not asked                    | 1606  | 34.3%      |

*Warning: these figures indicate the number of cases found in the data file. They cannot be interpreted as summary statistics of the population of interest.*

**# r7pad14\_grows\_3: Article 3. List of randomly selected articles by which the respondent has to pick which ones to read. Conjunction experiment.**

|                                   |                                                                                                                                                                                                                                                                                                                                                                                                                                                                                                                                                             |
|-----------------------------------|-------------------------------------------------------------------------------------------------------------------------------------------------------------------------------------------------------------------------------------------------------------------------------------------------------------------------------------------------------------------------------------------------------------------------------------------------------------------------------------------------------------------------------------------------------------|
| <b>Information</b>                | [Type= discrete] [Format=numeric] [Range= 1-1] [Missing=*]                                                                                                                                                                                                                                                                                                                                                                                                                                                                                                  |
| <b>Statistics [NW/ W]</b>         | [Valid=4689 /-] [Invalid=0 /-]                                                                                                                                                                                                                                                                                                                                                                                                                                                                                                                              |
| <b>Pre-question</b>               | We wish to study what media items people read. Below you will find some imaginary items similar to those you may find in Norwegian online newspapers. Please read all the headlines carefully and imagine that this is real.                                                                                                                                                                                                                                                                                                                                |
| <b>Literal question</b>           | <p>If you had to read [1 article /2 articles /3 articles], which [article /articles] would you have preferred to spend your time by?</p> <p>[Here follows a list of randomly chosen articles. See background variables]</p>                                                                                                                                                                                                                                                                                                                                 |
| <b>Interviewer's instructions</b> | <p>[Asked if R7PAD14_version&gt;1. Conjunction experiment. Respondents are exposed to a set of 6 random news and entertainment articles. The articles have a set of randomly drawn characteristics. R7PAD14_version randomly decides whether the respondent should be exposed of 4 articles or 6 articles. The order of which R7PAD14 and R7SELEXP2 is asked, is randomized. See R7SELEXP_order.]</p> <p>[Contact Sveinung Arnesen (Sveinung.Arnese@uib.no) or Mikael Johannesson (Mikael.Johannesson@uib.no) for questions and complete documentation]</p> |
| <b>Notes</b>                      | ^f('R7PAD14_body')[3]^ (Vi ønsker å studere hvilke mediesaker folk leser. Under er noen tenkte saker vi har laget som                                                                                                                                                                                                                                                                                                                                                                                                                                       |

| Value | Label                        | Cases | Percentage |
|-------|------------------------------|-------|------------|
| 0     |                              | 2078  | 44.3%      |
| 1     | Article chosen by respondent | 1001  | 21.3%      |
| 97    | No answer                    | 4     | 0.1%       |
| 98    | Not asked                    | 1606  | 34.3%      |

*Warning: these figures indicate the number of cases found in the data file. They cannot be interpreted as summary statistics of the population of interest.*

**# r7pad14\_grows\_4: Article 4. List of randomly selected articles by which the respondent has to pick which ones to read. Conjunction experiment.**

|                                   |                                                                                                                                                                                                                                |
|-----------------------------------|--------------------------------------------------------------------------------------------------------------------------------------------------------------------------------------------------------------------------------|
| <b>Information</b>                | [Type= discrete] [Format=numeric] [Range= 1-1] [Missing=*]                                                                                                                                                                     |
| <b>Statistics [NW/ W]</b>         | [Valid=4689 /-] [Invalid=0 /-]                                                                                                                                                                                                 |
| <b>Pre-question</b>               | We wish to study what media items people read. Below you will find some imaginary items similar to those you may find in Norwegian online newspapers. Please read all the headlines carefully and imagine that this is real.   |
| <b>Literal question</b>           | <p>If you had to read [1 article /2 articles /3 articles], which [article /articles] would you have preferred to spend your time by?</p> <p>[Here follows a list of randomly chosen articles. See background variables]</p>    |
| <b>Interviewer's instructions</b> | [Asked if R7PAD14_version>1. Conjunction experiment. Respondents are exposed to a set of 6 random news and entertainment articles. The articles have a set of randomly drawn characteristics. R7PAD14_version randomly decides |

**# r7pad14\_grows\_4: Article 4. List of randomly selected articles by which the respondent has to pick which ones to read. Conjunction experiment.**

|  |                                                                                                                                                                                                                                                                                                                    |
|--|--------------------------------------------------------------------------------------------------------------------------------------------------------------------------------------------------------------------------------------------------------------------------------------------------------------------|
|  | whether the respondent should be exposed of 4 articles or 6 articles. The order of which R7PAD14 and R7SELEXP2 is asked, is randomized. See R7SELEXP_order.]<br><br>[Contact Sveinung Arnesen (Sveinung.Arnese@uib.no) or Mikael Johannesson (Mikael.Johannesson@uib.no) for questions and complete documentation] |
|--|--------------------------------------------------------------------------------------------------------------------------------------------------------------------------------------------------------------------------------------------------------------------------------------------------------------------|

|              |                                                                                                                         |
|--------------|-------------------------------------------------------------------------------------------------------------------------|
| <b>Notes</b> | ^f('R7PAD14_body')['4']^ (Vi ønsker å studere hvilke mediesaker folk leser. Under er noen tenkte saker vi har laget som |
|--------------|-------------------------------------------------------------------------------------------------------------------------|

| Value | Label                        | Cases | Percentage |
|-------|------------------------------|-------|------------|
| 0     |                              | 2079  | 44.3%      |
| 1     | Article chosen by respondent | 1000  | 21.3%      |
| 97    | No answer                    | 4     | 0.1%       |
| 98    | Not asked                    | 1606  | 34.3%      |

*Warning: these figures indicate the number of cases found in the data file. They cannot be interpreted as summary statistics of the population of interest.*

**# r7pad14\_grows\_5: Article 5. List of randomly selected articles by which the respondent has to pick which ones to read. Conjunction experiment.**

|                    |                                                            |
|--------------------|------------------------------------------------------------|
| <b>Information</b> | [Type= discrete] [Format=numeric] [Range= 1-1] [Missing=*] |
|--------------------|------------------------------------------------------------|

|                           |                                |
|---------------------------|--------------------------------|
| <b>Statistics [NW/ W]</b> | [Valid=4689 /-] [Invalid=0 /-] |
|---------------------------|--------------------------------|

|                     |                                                                                                                                                                                                                              |
|---------------------|------------------------------------------------------------------------------------------------------------------------------------------------------------------------------------------------------------------------------|
| <b>Pre-question</b> | We wish to study what media items people read. Below you will find some imaginary items similar to those you may find in Norwegian online newspapers. Please read all the headlines carefully and imagine that this is real. |
|---------------------|------------------------------------------------------------------------------------------------------------------------------------------------------------------------------------------------------------------------------|

|                         |                                                                                                                                                                                                                      |
|-------------------------|----------------------------------------------------------------------------------------------------------------------------------------------------------------------------------------------------------------------|
| <b>Literal question</b> | If you had to read [1 article /2 articles /3 articles], which [article /articles] would you have preferred to spend your time by?<br><br>[Here follows a list of randomly chosen articles. See background variables] |
|-------------------------|----------------------------------------------------------------------------------------------------------------------------------------------------------------------------------------------------------------------|

|                                   |                                                                                                                                                                                                                                                                                                                                                                                                                                                                                                                                                   |
|-----------------------------------|---------------------------------------------------------------------------------------------------------------------------------------------------------------------------------------------------------------------------------------------------------------------------------------------------------------------------------------------------------------------------------------------------------------------------------------------------------------------------------------------------------------------------------------------------|
| <b>Interviewer's instructions</b> | [Asked if R7PAD14_version>1. Conjunction experiment. Respondents are exposed to a set of 6 random news and entertainment articles. The articles have a set of randomly drawn characteristics. R7PAD14_version randomly decides whether the respondent should be exposed of 4 articles or 6 articles. The order of which R7PAD14 and R7SELEXP2 is asked, is randomized. See R7SELEXP_order.]<br><br>[Contact Sveinung Arnesen (Sveinung.Arnese@uib.no) or Mikael Johannesson (Mikael.Johannesson@uib.no) for questions and complete documentation] |
|-----------------------------------|---------------------------------------------------------------------------------------------------------------------------------------------------------------------------------------------------------------------------------------------------------------------------------------------------------------------------------------------------------------------------------------------------------------------------------------------------------------------------------------------------------------------------------------------------|

|              |                                                                                                                         |
|--------------|-------------------------------------------------------------------------------------------------------------------------|
| <b>Notes</b> | ^f('R7PAD14_body')['5']^ (Vi ønsker å studere hvilke mediesaker folk leser. Under er noen tenkte saker vi har laget som |
|--------------|-------------------------------------------------------------------------------------------------------------------------|

| Value | Label                        | Cases | Percentage |
|-------|------------------------------|-------|------------|
| 0     |                              | 2147  | 45.8%      |
| 1     | Article chosen by respondent | 932   | 19.9%      |
| 97    | No answer                    | 4     | 0.1%       |
| 98    | Not asked                    | 1606  | 34.3%      |

*Warning: these figures indicate the number of cases found in the data file. They cannot be interpreted as summary statistics of the population of interest.*

**# r7pad14\_grows\_6: Article 6. List of randomly selected articles by which the respondent has to pick which ones to read. Conjunction experiment.**

|                    |                                                            |
|--------------------|------------------------------------------------------------|
| <b>Information</b> | [Type= discrete] [Format=numeric] [Range= 1-1] [Missing=*] |
|--------------------|------------------------------------------------------------|

|                           |                                |
|---------------------------|--------------------------------|
| <b>Statistics [NW/ W]</b> | [Valid=4689 /-] [Invalid=0 /-] |
|---------------------------|--------------------------------|

|                     |                                                                                                                                                                                                                              |
|---------------------|------------------------------------------------------------------------------------------------------------------------------------------------------------------------------------------------------------------------------|
| <b>Pre-question</b> | We wish to study what media items people read. Below you will find some imaginary items similar to those you may find in Norwegian online newspapers. Please read all the headlines carefully and imagine that this is real. |
|---------------------|------------------------------------------------------------------------------------------------------------------------------------------------------------------------------------------------------------------------------|

|                         |                                                                                                                                                                                                                      |
|-------------------------|----------------------------------------------------------------------------------------------------------------------------------------------------------------------------------------------------------------------|
| <b>Literal question</b> | If you had to read [1 article /2 articles /3 articles], which [article /articles] would you have preferred to spend your time by?<br><br>[Here follows a list of randomly chosen articles. See background variables] |
|-------------------------|----------------------------------------------------------------------------------------------------------------------------------------------------------------------------------------------------------------------|

|                                   |                                                                                                                                                                                                                                                                                                                                                                                             |
|-----------------------------------|---------------------------------------------------------------------------------------------------------------------------------------------------------------------------------------------------------------------------------------------------------------------------------------------------------------------------------------------------------------------------------------------|
| <b>Interviewer's instructions</b> | [Asked if R7PAD14_version>1. Conjunction experiment. Respondents are exposed to a set of 6 random news and entertainment articles. The articles have a set of randomly drawn characteristics. R7PAD14_version randomly decides whether the respondent should be exposed of 4 articles or 6 articles. The order of which R7PAD14 and R7SELEXP2 is asked, is randomized. See R7SELEXP_order.] |
|-----------------------------------|---------------------------------------------------------------------------------------------------------------------------------------------------------------------------------------------------------------------------------------------------------------------------------------------------------------------------------------------------------------------------------------------|

**# r7pad14\_grows\_6: Article 6. List of randomly selected articles by which the respondent has to pick which ones to read. Conjunction experiment.**

[Contact Sveinung Arnesen (Sveinung.Arnese@uib.no) or Mikael Johannesson (Mikael.Johannesson@uib.no) for questions and complete documentation]

**Notes** ^f('R7PAD14\_body')['6']^ (Vi ønsker å studere hvilke mediasaker folk leser. Under er noen tenkte saker vi har laget som

| Value | Label                        | Cases | Percentage        |
|-------|------------------------------|-------|-------------------|
| 0     |                              | 2066  | <div></div> 44.1% |
| 1     | Article chosen by respondent | 1013  | <div></div> 21.6% |
| 97    | No answer                    | 4     | <div></div> 0.1%  |
| 98    | Not asked                    | 1606  | <div></div> 34.3% |

*Warning: these figures indicate the number of cases found in the data file. They cannot be interpreted as summary statistics of the population of interest.*

**# r7selexp2\_1: Article 1. List of randomly selected articles by which the respondent has to pick which ones to read. Conjunction experiment.**

**Information** [Type= discrete] [Format=numeric] [Range= 1-1] [Missing=\*]

**Statistics [NW/ W]** [Valid=4689 /-] [Invalid=0 /-]

**Pre-question** We wish to study what media items people read. Below you will find some imaginary items similar to those you may find in Norwegian online newspapers. Please read all the headlines carefully and imagine that this is real.

**Literal question** If you had to read [1 article /2 articles /3articles], which [article /articles] would you have preferred to spend your time by?  
[Here follows a list of randomly chosen articles. See background variables]

**Interviewer's instructions** [All respondents asked. Conjunction experiment. Respondents are exposed of a set of random news and entertainment articles. The articles have a set of randomly drawn characteristics. The order of which R7PAD14 and R7SELEXP2 is asked, is randomized. See R7SELEXP\_order.]  
  
[Contact Sveinung Arnesen (Sveinung.Arnese@uib.no) or Mikael Johannesson (Mikael.Johannesson@uib.no) for questions and complete documentation]

**Notes** ^f('R7SELEXP2\_body')['1']^ (Vi ønsker å studere hvilke mediasaker folk leser. Under er noen tenkte saker vi har laget s

| Value | Label                        | Cases | Percentage        |
|-------|------------------------------|-------|-------------------|
| 0     |                              | 2415  | <div></div> 51.5% |
| 1     | Article chosen by respondent | 2236  | <div></div> 47.7% |
| 97    | No answer                    | 38    | <div></div> 0.8%  |

*Warning: these figures indicate the number of cases found in the data file. They cannot be interpreted as summary statistics of the population of interest.*

**# r7selexp2\_2: Article 2. List of randomly selected articles by which the respondent has to pick which ones to read. Conjunction experiment.**

**Information** [Type= discrete] [Format=numeric] [Range= 1-1] [Missing=\*]

**Statistics [NW/ W]** [Valid=4689 /-] [Invalid=0 /-]

**Pre-question** We wish to study what media items people read. Below you will find some imaginary items similar to those you may find in Norwegian online newspapers. Please read all the headlines carefully and imagine that this is real.

**Literal question** If you had to read [1 article /2 articles /3articles], which [article /articles] would you have preferred to spend your time by?  
[Here follows a list of randomly chosen articles. See background variables]

**Interviewer's instructions** [All respondents asked. Conjunction experiment. Respondents are exposed of a set of random news and entertainment articles. The articles have a set of randomly drawn characteristics. The order of which R7PAD14 and R7SELEXP2 is asked, is randomized. See R7SELEXP\_order.]  
  
[Contact Sveinung Arnesen (Sveinung.Arnese@uib.no) or Mikael Johannesson (Mikael.Johannesson@uib.no) for questions and complete documentation]

**Notes** ^f('R7SELEXP2\_body')['2']^ (Vi ønsker å studere hvilke mediasaker folk leser. Under er noen tenkte saker vi har laget s

| Value | Label | Cases | Percentage        |
|-------|-------|-------|-------------------|
| 0     |       | 2364  | <div></div> 50.4% |

**# r7selexp2\_2: Article 2. List of randomly selected articles by which the respondent has to pick which ones to read. Conjunction experiment.**

| Value | Label                        | Cases | Percentage |
|-------|------------------------------|-------|------------|
| 1     | Article chosen by respondent | 2287  | 48.8%      |
| 97    | No answer                    | 38    | 0.8%       |

*Warning: these figures indicate the number of cases found in the data file. They cannot be interpreted as summary statistics of the population of interest.*

**# r7selexp2\_3: Article 3. List of randomly selected articles by which the respondent has to pick which ones to read. Conjunction experiment.**

|                                   |                                                                                                                                                                                                                                                                                                                                                                                                                                     |
|-----------------------------------|-------------------------------------------------------------------------------------------------------------------------------------------------------------------------------------------------------------------------------------------------------------------------------------------------------------------------------------------------------------------------------------------------------------------------------------|
| <b>Information</b>                | [Type= discrete] [Format=numeric] [Range= 1-1] [Missing=*]                                                                                                                                                                                                                                                                                                                                                                          |
| <b>Statistics [NW/ W]</b>         | [Valid=4689 /-] [Invalid=0 /-]                                                                                                                                                                                                                                                                                                                                                                                                      |
| <b>Pre-question</b>               | We wish to study what media items people read. Below you will find some imaginary items similar to those you may find in Norwegian online newspapers. Please read all the headlines carefully and imagine that this is real.                                                                                                                                                                                                        |
| <b>Literal question</b>           | If you had to read [1 article /2 articles /3articles], which [article /articles] would you have preferred to spend your time by?<br><br>[Here follows a list of randomly chosen articles. See background variables]                                                                                                                                                                                                                 |
| <b>Interviewer's instructions</b> | [All respondents asked. Conjunction experiment. Respondents are exposed of a set of random news and entertainment articles. The articles have a set of randomly drawn characteristics. The order of which R7PAD14 and R7SELEXP2 is asked, is randomized. See R7SELEXP_order.]<br><br>[Contact Sveinung Arnesen (Sveinung.Arnese@uib.no) or Mikael Johannesson (Mikael.Johannesson@uib.no) for questions and complete documentation] |
| <b>Notes</b>                      | ^f('R7SELEXP2_body')[3]^ (Vi ønsker å studere hvilke mediasaker folk leser. Under er noen tenkte saker vi har laget s                                                                                                                                                                                                                                                                                                               |

| Value | Label                        | Cases | Percentage |
|-------|------------------------------|-------|------------|
| 0     |                              | 2395  | 51.1%      |
| 1     | Article chosen by respondent | 2256  | 48.1%      |
| 97    | No answer                    | 38    | 0.8%       |

*Warning: these figures indicate the number of cases found in the data file. They cannot be interpreted as summary statistics of the population of interest.*

**# r7selexp2\_4: Article 4. List of randomly selected articles by which the respondent has to pick which ones to read. Conjunction experiment.**

|                                   |                                                                                                                                                                                                                                                                                                                                                                                                                                     |
|-----------------------------------|-------------------------------------------------------------------------------------------------------------------------------------------------------------------------------------------------------------------------------------------------------------------------------------------------------------------------------------------------------------------------------------------------------------------------------------|
| <b>Information</b>                | [Type= discrete] [Format=numeric] [Range= 1-1] [Missing=*]                                                                                                                                                                                                                                                                                                                                                                          |
| <b>Statistics [NW/ W]</b>         | [Valid=4689 /-] [Invalid=0 /-]                                                                                                                                                                                                                                                                                                                                                                                                      |
| <b>Pre-question</b>               | We wish to study what media items people read. Below you will find some imaginary items similar to those you may find in Norwegian online newspapers. Please read all the headlines carefully and imagine that this is real.                                                                                                                                                                                                        |
| <b>Literal question</b>           | If you had to read [1 article /2 articles /3articles], which [article /articles] would you have preferred to spend your time by?<br><br>[Here follows a list of randomly chosen articles. See background variables]                                                                                                                                                                                                                 |
| <b>Interviewer's instructions</b> | [All respondents asked. Conjunction experiment. Respondents are exposed of a set of random news and entertainment articles. The articles have a set of randomly drawn characteristics. The order of which R7PAD14 and R7SELEXP2 is asked, is randomized. See R7SELEXP_order.]<br><br>[Contact Sveinung Arnesen (Sveinung.Arnese@uib.no) or Mikael Johannesson (Mikael.Johannesson@uib.no) for questions and complete documentation] |
| <b>Notes</b>                      | ^f('R7SELEXP2_body')[4]^ (Vi ønsker å studere hvilke mediasaker folk leser. Under er noen tenkte saker vi har laget s                                                                                                                                                                                                                                                                                                               |

| Value | Label                        | Cases | Percentage |
|-------|------------------------------|-------|------------|
| 0     |                              | 2421  | 51.6%      |
| 1     | Article chosen by respondent | 2230  | 47.6%      |
| 97    | No answer                    | 38    | 0.8%       |

*Warning: these figures indicate the number of cases found in the data file. They cannot be interpreted as summary statistics of the population of interest.*



**# r7Error\_selexp: 36 respondents experienced an error in experiment r7pad14 and r7selexp2. The error stopped them from progressing in the questionnaire.**

|                           |                                               |
|---------------------------|-----------------------------------------------|
| <b>Information</b>        | [Type= discrete] [Format=numeric] [Missing=*] |
| <b>Statistics [NW/ W]</b> | [Valid=4689 /-] [Invalid=0 /-]                |

| Value | Label                       | Cases | Percentage |
|-------|-----------------------------|-------|------------|
| 0     | Did not experience an error | 4653  | 99.2%      |
| 1     | Did experience an error     | 36    | 0.8%       |

*Warning: these figures indicate the number of cases found in the data file. They cannot be interpreted as summary statistics of the population of interest.*

**# r7selexp\_order: The order of which r7pad14 and r7selexp is asked. The order is randomized.**

|                           |                                                 |
|---------------------------|-------------------------------------------------|
| <b>Information</b>        | [Type= discrete] [Format=character] [Missing=*] |
| <b>Statistics [NW/ W]</b> | [Valid=4689 /-] [Invalid=0 /-]                  |

|                                   |                                                              |
|-----------------------------------|--------------------------------------------------------------|
| <b>Interviewer's instructions</b> | [Stores the order of which R7PAD14 and R7SELEXP2 is asked. ] |
|-----------------------------------|--------------------------------------------------------------|

| Value         | Label | Cases | Percentage |
|---------------|-------|-------|------------|
|               |       | 42    | 0.9%       |
| R7PAD14,R7SEL |       | 2330  | 49.7%      |
| R7SELEXP2,R7P |       | 2317  | 49.4%      |

*Warning: these figures indicate the number of cases found in the data file. They cannot be interpreted as summary statistics of the population of interest.*

**# r7pad6\_profile1\_1: Characteristic for profile 1: age. Background variable for r7pad6.**

|                           |                                                 |
|---------------------------|-------------------------------------------------|
| <b>Information</b>        | [Type= discrete] [Format=character] [Missing=*] |
| <b>Statistics [NW/ W]</b> | [Valid=4689 /-] [Invalid=0 /-]                  |

|                                   |                                                                                                       |
|-----------------------------------|-------------------------------------------------------------------------------------------------------|
| <b>Interviewer's instructions</b> | [Background variable. Stores a randomly selected age for profile 1 in conjunction experiment R7PAD6.] |
|-----------------------------------|-------------------------------------------------------------------------------------------------------|

| Value | Label | Cases | Percentage |
|-------|-------|-------|------------|
|       |       | 3597  | 76.7%      |
| 22 år |       | 162   | 3.5%       |
| 30 år |       | 153   | 3.3%       |
| 40 år |       | 150   | 3.2%       |
| 50 år |       | 135   | 2.9%       |
| 60 år |       | 169   | 3.6%       |
| 70 år |       | 169   | 3.6%       |
| 80 år |       | 154   | 3.3%       |

*Warning: these figures indicate the number of cases found in the data file. They cannot be interpreted as summary statistics of the population of interest.*

**# r7pad6\_profile1\_2: Characteristic for profile 1: gender. Background variable for r7pad6.**

|                           |                                                 |
|---------------------------|-------------------------------------------------|
| <b>Information</b>        | [Type= discrete] [Format=character] [Missing=*] |
| <b>Statistics [NW/ W]</b> | [Valid=4689 /-] [Invalid=0 /-]                  |

|                                   |                                                                                                       |
|-----------------------------------|-------------------------------------------------------------------------------------------------------|
| <b>Interviewer's instructions</b> | [Background variable. Stores a randomly selected sex for profile 1 in conjunction experiment R7PAD6.] |
|-----------------------------------|-------------------------------------------------------------------------------------------------------|

| Value  | Label | Cases | Percentage |
|--------|-------|-------|------------|
|        |       | 3597  | 76.7%      |
| Kvinne |       | 539   | 11.5%      |
| Mann   |       | 553   | 11.8%      |

*Warning: these figures indicate the number of cases found in the data file. They cannot be interpreted as summary statistics of the population of interest.*

**# r7pad6\_profile1\_3: Characteristic for profile 1: from. Background variable for r7pad6.**

|                           |                                                 |
|---------------------------|-------------------------------------------------|
| <b>Information</b>        | [Type= discrete] [Format=character] [Missing=*] |
| <b>Statistics [NW/ W]</b> | [Valid=4689 /-] [Invalid=0 /-]                  |

|                                   |                                                                                                                       |
|-----------------------------------|-----------------------------------------------------------------------------------------------------------------------|
| <b>Interviewer's instructions</b> | [Background variable. Stores a randomly selected geographical region for profile 1 in conjunction experiment R7PAD6.] |
|-----------------------------------|-----------------------------------------------------------------------------------------------------------------------|

| # r7pad6_profile1_3: Characteristic for profile 1: from. Background variable for r7pad6.                                                                    |                                                                                                                         |       |                              |
|-------------------------------------------------------------------------------------------------------------------------------------------------------------|-------------------------------------------------------------------------------------------------------------------------|-------|------------------------------|
| Value                                                                                                                                                       | Label                                                                                                                   | Cases | Percentage                   |
|                                                                                                                                                             |                                                                                                                         | 3597  | <div><div></div></div> 76.7% |
| Midt-Norge                                                                                                                                                  |                                                                                                                         | 168   | <div><div></div></div> 3.6%  |
| Nord-Norge                                                                                                                                                  |                                                                                                                         | 189   | <div><div></div></div> 4.0%  |
| Oslo                                                                                                                                                        |                                                                                                                         | 168   | <div><div></div></div> 3.6%  |
| Sørlandet                                                                                                                                                   |                                                                                                                         | 186   | <div><div></div></div> 4.0%  |
| Vestlandet                                                                                                                                                  |                                                                                                                         | 186   | <div><div></div></div> 4.0%  |
| Østlandet                                                                                                                                                   |                                                                                                                         | 195   | <div><div></div></div> 4.2%  |
| Warning: these figures indicate the number of cases found in the data file. They cannot be interpreted as summary statistics of the population of interest. |                                                                                                                         |       |                              |
| # r7pad6_profile1_4: Characteristic for profile 1: relationship status. Background variable for r7pad6.                                                     |                                                                                                                         |       |                              |
| Information                                                                                                                                                 | [Type= discrete] [Format=character] [Missing=*]                                                                         |       |                              |
| Statistics [NW/ W]                                                                                                                                          | [Valid=4689 /-] [Invalid=0 /-]                                                                                          |       |                              |
| Interviewer's instructions                                                                                                                                  | [Background variable. Stores a randomly selected relationship status for profile 1 in conjunction experiment R7PAD6.]   |       |                              |
| Value                                                                                                                                                       | Label                                                                                                                   | Cases | Percentage                   |
|                                                                                                                                                             |                                                                                                                         | 3597  | <div><div></div></div> 76.7% |
| Bor alene                                                                                                                                                   |                                                                                                                         | 358   | <div><div></div></div> 7.6%  |
| Gift                                                                                                                                                        |                                                                                                                         | 336   | <div><div></div></div> 7.2%  |
| Samboer                                                                                                                                                     |                                                                                                                         | 398   | <div><div></div></div> 8.5%  |
| Warning: these figures indicate the number of cases found in the data file. They cannot be interpreted as summary statistics of the population of interest. |                                                                                                                         |       |                              |
| # r7pad6_profile1_5: Characteristic for profile 1: education. Background variable for r7pad6.                                                               |                                                                                                                         |       |                              |
| Information                                                                                                                                                 | [Type= discrete] [Format=character] [Missing=*]                                                                         |       |                              |
| Statistics [NW/ W]                                                                                                                                          | [Valid=4689 /-] [Invalid=0 /-]                                                                                          |       |                              |
| Interviewer's instructions                                                                                                                                  | [Background variable. Stores a randomly selected education level for profile 1 in conjunction experiment R7PAD6.]       |       |                              |
| Value                                                                                                                                                       | Label                                                                                                                   | Cases | Percentage                   |
|                                                                                                                                                             |                                                                                                                         | 3597  | <div><div></div></div> 76.7% |
| Doktorgrad                                                                                                                                                  |                                                                                                                         | 279   | <div><div></div></div> 6.0%  |
| Grunnskole                                                                                                                                                  |                                                                                                                         | 258   | <div><div></div></div> 5.5%  |
| Universitet                                                                                                                                                 |                                                                                                                         | 275   | <div><div></div></div> 5.9%  |
| Videregående                                                                                                                                                |                                                                                                                         | 280   | <div><div></div></div> 6.0%  |
| Warning: these figures indicate the number of cases found in the data file. They cannot be interpreted as summary statistics of the population of interest. |                                                                                                                         |       |                              |
| # r7pad6_profile1_6: Characteristic for profile 1: religion. Background variable for r7pad6.                                                                |                                                                                                                         |       |                              |
| Information                                                                                                                                                 | [Type= discrete] [Format=character] [Missing=*]                                                                         |       |                              |
| Statistics [NW/ W]                                                                                                                                          | [Valid=4689 /-] [Invalid=0 /-]                                                                                          |       |                              |
| Interviewer's instructions                                                                                                                                  | [Background variable. Stores a randomly selected religious affiliation for profile 1 in conjunction experiment R7PAD6.] |       |                              |
| Value                                                                                                                                                       | Label                                                                                                                   | Cases | Percentage                   |
|                                                                                                                                                             |                                                                                                                         | 3597  | <div><div></div></div> 76.7% |
| Ingen                                                                                                                                                       |                                                                                                                         | 349   | <div><div></div></div> 7.4%  |
| Islam                                                                                                                                                       |                                                                                                                         | 360   | <div><div></div></div> 7.7%  |
| Kristendom                                                                                                                                                  |                                                                                                                         | 383   | <div><div></div></div> 8.2%  |
| Warning: these figures indicate the number of cases found in the data file. They cannot be interpreted as summary statistics of the population of interest. |                                                                                                                         |       |                              |
| # r7pad6_profile1_7: Characteristic for profile 1: work experience. Background variable for r7pad6.                                                         |                                                                                                                         |       |                              |
| Information                                                                                                                                                 | [Type= discrete] [Format=character] [Missing=*]                                                                         |       |                              |
| Statistics [NW/ W]                                                                                                                                          | [Valid=4689 /-] [Invalid=0 /-]                                                                                          |       |                              |

| # r7pad6_profile1_7: Characteristic for profile 1: work experience. Background variable for r7pad6.                                                                |       |                                                                                                                       |                              |
|--------------------------------------------------------------------------------------------------------------------------------------------------------------------|-------|-----------------------------------------------------------------------------------------------------------------------|------------------------------|
| <b>Interviewer's instructions</b>                                                                                                                                  |       | [Background variable. Stores a randomly selected profession for profile 1 in conjunction experiment R7PAD6.]          |                              |
| Value                                                                                                                                                              | Label | Cases                                                                                                                 | Percentage                   |
|                                                                                                                                                                    |       | 3597                                                                                                                  | <div><div></div></div> 76.7% |
| Bonde                                                                                                                                                              |       | 175                                                                                                                   | <div><div></div></div> 3.7%  |
| IT-konsulent                                                                                                                                                       |       | 172                                                                                                                   | <div><div></div></div> 3.7%  |
| Ingen                                                                                                                                                              |       | 186                                                                                                                   | <div><div></div></div> 4.0%  |
| Oljearbeider                                                                                                                                                       |       | 183                                                                                                                   | <div><div></div></div> 3.9%  |
| Omsorgsarbeider                                                                                                                                                    |       | 208                                                                                                                   | <div><div></div></div> 4.4%  |
| Selvstendig næringsdrivende                                                                                                                                        |       | 168                                                                                                                   | <div><div></div></div> 3.6%  |
| <i>Warning: these figures indicate the number of cases found in the data file. They cannot be interpreted as summary statistics of the population of interest.</i> |       |                                                                                                                       |                              |
| # r7pad6_profile2_1: Characteristic for profile 2: age. Background variable for r7pad6.                                                                            |       |                                                                                                                       |                              |
| <b>Information</b>                                                                                                                                                 |       | [Type= discrete] [Format=character] [Missing=*]                                                                       |                              |
| <b>Statistics [NW/ W]</b>                                                                                                                                          |       | [Valid=4689 /-] [Invalid=0 /-]                                                                                        |                              |
| <b>Interviewer's instructions</b>                                                                                                                                  |       | [Background variable. Stores a randomly selected age for profile 2 in conjunction experiment R7PAD6.]                 |                              |
| Value                                                                                                                                                              | Label | Cases                                                                                                                 | Percentage                   |
|                                                                                                                                                                    |       | 3597                                                                                                                  | <div><div></div></div> 76.7% |
| 22 år                                                                                                                                                              |       | 147                                                                                                                   | <div><div></div></div> 3.1%  |
| 30 år                                                                                                                                                              |       | 159                                                                                                                   | <div><div></div></div> 3.4%  |
| 40 år                                                                                                                                                              |       | 146                                                                                                                   | <div><div></div></div> 3.1%  |
| 50 år                                                                                                                                                              |       | 165                                                                                                                   | <div><div></div></div> 3.5%  |
| 60 år                                                                                                                                                              |       | 166                                                                                                                   | <div><div></div></div> 3.5%  |
| 70 år                                                                                                                                                              |       | 155                                                                                                                   | <div><div></div></div> 3.3%  |
| 80 år                                                                                                                                                              |       | 154                                                                                                                   | <div><div></div></div> 3.3%  |
| <i>Warning: these figures indicate the number of cases found in the data file. They cannot be interpreted as summary statistics of the population of interest.</i> |       |                                                                                                                       |                              |
| # r7pad6_profile2_2: Characteristic for profile 2: gender. Background variable for r7pad6.                                                                         |       |                                                                                                                       |                              |
| <b>Information</b>                                                                                                                                                 |       | [Type= discrete] [Format=character] [Missing=*]                                                                       |                              |
| <b>Statistics [NW/ W]</b>                                                                                                                                          |       | [Valid=4689 /-] [Invalid=0 /-]                                                                                        |                              |
| <b>Interviewer's instructions</b>                                                                                                                                  |       | [Background variable. Stores a randomly selected sex for profile 2 in conjunction experiment R7PAD6.]                 |                              |
| Value                                                                                                                                                              | Label | Cases                                                                                                                 | Percentage                   |
|                                                                                                                                                                    |       | 3597                                                                                                                  | <div><div></div></div> 76.7% |
| Kvinne                                                                                                                                                             |       | 549                                                                                                                   | <div><div></div></div> 11.7% |
| Mann                                                                                                                                                               |       | 543                                                                                                                   | <div><div></div></div> 11.6% |
| <i>Warning: these figures indicate the number of cases found in the data file. They cannot be interpreted as summary statistics of the population of interest.</i> |       |                                                                                                                       |                              |
| # r7pad6_profile2_3: Characteristic for profile 2: from. Background variable for r7pad6.                                                                           |       |                                                                                                                       |                              |
| <b>Information</b>                                                                                                                                                 |       | [Type= discrete] [Format=character] [Missing=*]                                                                       |                              |
| <b>Statistics [NW/ W]</b>                                                                                                                                          |       | [Valid=4689 /-] [Invalid=0 /-]                                                                                        |                              |
| <b>Interviewer's instructions</b>                                                                                                                                  |       | [Background variable. Stores a randomly selected geographical region for profile 2 in conjunction experiment R7PAD6.] |                              |
| Value                                                                                                                                                              | Label | Cases                                                                                                                 | Percentage                   |
|                                                                                                                                                                    |       | 3597                                                                                                                  | <div><div></div></div> 76.7% |
| Midt-Norge                                                                                                                                                         |       | 190                                                                                                                   | <div><div></div></div> 4.1%  |
| Nord-Norge                                                                                                                                                         |       | 183                                                                                                                   | <div><div></div></div> 3.9%  |
| Oslo                                                                                                                                                               |       | 187                                                                                                                   | <div><div></div></div> 4.0%  |

| # r7pad6_profile2_3: Characteristic for profile 2: from. Background variable for r7pad6.                                                                    |                                                                                                                         |       |                              |
|-------------------------------------------------------------------------------------------------------------------------------------------------------------|-------------------------------------------------------------------------------------------------------------------------|-------|------------------------------|
| Value                                                                                                                                                       | Label                                                                                                                   | Cases | Percentage                   |
| Sørlandet                                                                                                                                                   |                                                                                                                         | 180   | <div><div></div></div> 3.8%  |
| Vestlandet                                                                                                                                                  |                                                                                                                         | 171   | <div><div></div></div> 3.6%  |
| Østlandet                                                                                                                                                   |                                                                                                                         | 181   | <div><div></div></div> 3.9%  |
| Warning: these figures indicate the number of cases found in the data file. They cannot be interpreted as summary statistics of the population of interest. |                                                                                                                         |       |                              |
| # r7pad6_profile2_4: Characteristic for profile 2: relationship status. Background variable for r7pad6.                                                     |                                                                                                                         |       |                              |
| Information                                                                                                                                                 | [Type= discrete] [Format=character] [Missing=*]                                                                         |       |                              |
| Statistics [NW/ W]                                                                                                                                          | [Valid=4689 /-] [Invalid=0 /-]                                                                                          |       |                              |
| Interviewer's instructions                                                                                                                                  | [Background variable. Stores a randomly selected relationship status for profile 2 in conjunction experiment R7PAD6.]   |       |                              |
| Value                                                                                                                                                       | Label                                                                                                                   | Cases | Percentage                   |
|                                                                                                                                                             |                                                                                                                         | 3597  | <div><div></div></div> 76.7% |
| Bor alene                                                                                                                                                   |                                                                                                                         | 380   | <div><div></div></div> 8.1%  |
| Gift                                                                                                                                                        |                                                                                                                         | 375   | <div><div></div></div> 8.0%  |
| Samboer                                                                                                                                                     |                                                                                                                         | 337   | <div><div></div></div> 7.2%  |
| Warning: these figures indicate the number of cases found in the data file. They cannot be interpreted as summary statistics of the population of interest. |                                                                                                                         |       |                              |
| # r7pad6_profile2_5: Characteristic for profile 2: education. Background variable for r7pad6.                                                               |                                                                                                                         |       |                              |
| Information                                                                                                                                                 | [Type= discrete] [Format=character] [Missing=*]                                                                         |       |                              |
| Statistics [NW/ W]                                                                                                                                          | [Valid=4689 /-] [Invalid=0 /-]                                                                                          |       |                              |
| Interviewer's instructions                                                                                                                                  | [Background variable. Stores a randomly selected education level for profile 2 in conjunction experiment R7PAD6.]       |       |                              |
| Value                                                                                                                                                       | Label                                                                                                                   | Cases | Percentage                   |
|                                                                                                                                                             |                                                                                                                         | 3597  | <div><div></div></div> 76.7% |
| Doktorgrad                                                                                                                                                  |                                                                                                                         | 270   | <div><div></div></div> 5.8%  |
| Grunnskole                                                                                                                                                  |                                                                                                                         | 276   | <div><div></div></div> 5.9%  |
| Universitet                                                                                                                                                 |                                                                                                                         | 263   | <div><div></div></div> 5.6%  |
| Videregående                                                                                                                                                |                                                                                                                         | 283   | <div><div></div></div> 6.0%  |
| Warning: these figures indicate the number of cases found in the data file. They cannot be interpreted as summary statistics of the population of interest. |                                                                                                                         |       |                              |
| # r7pad6_profile2_6: Characteristic for profile 2: religion. Background variable for r7pad6.                                                                |                                                                                                                         |       |                              |
| Information                                                                                                                                                 | [Type= discrete] [Format=character] [Missing=*]                                                                         |       |                              |
| Statistics [NW/ W]                                                                                                                                          | [Valid=4689 /-] [Invalid=0 /-]                                                                                          |       |                              |
| Interviewer's instructions                                                                                                                                  | [Background variable. Stores a randomly selected religious affiliation for profile 2 in conjunction experiment R7PAD6.] |       |                              |
| Value                                                                                                                                                       | Label                                                                                                                   | Cases | Percentage                   |
|                                                                                                                                                             |                                                                                                                         | 3597  | <div><div></div></div> 76.7% |
| Ingen                                                                                                                                                       |                                                                                                                         | 345   | <div><div></div></div> 7.4%  |
| Islam                                                                                                                                                       |                                                                                                                         | 380   | <div><div></div></div> 8.1%  |
| Kristendom                                                                                                                                                  |                                                                                                                         | 367   | <div><div></div></div> 7.8%  |
| Warning: these figures indicate the number of cases found in the data file. They cannot be interpreted as summary statistics of the population of interest. |                                                                                                                         |       |                              |
| # r7pad6_profile2_7: Characteristic for profile 2: work experience. Background variable for r7pad6.                                                         |                                                                                                                         |       |                              |
| Information                                                                                                                                                 | [Type= discrete] [Format=character] [Missing=*]                                                                         |       |                              |
| Statistics [NW/ W]                                                                                                                                          | [Valid=4689 /-] [Invalid=0 /-]                                                                                          |       |                              |
| Interviewer's instructions                                                                                                                                  | [Background variable. Stores a randomly selected profession for profile 2 in conjunction experiment R7PAD6.]            |       |                              |
| Value                                                                                                                                                       | Label                                                                                                                   | Cases | Percentage                   |
|                                                                                                                                                             |                                                                                                                         | 3597  | <div><div></div></div> 76.7% |
| Bonde                                                                                                                                                       |                                                                                                                         | 184   | <div><div></div></div> 3.9%  |

# r7pad6\_profile2\_7: Characteristic for profile 2: work experiencee. Background variable for r7pad6.

| Value                       | Label | Cases | Percentage |
|-----------------------------|-------|-------|------------|
| IT-konsulent                |       | 191   | 4.1%       |
| Ingen                       |       | 165   | 3.5%       |
| Oljearbeider                |       | 175   | 3.7%       |
| Omsorgsarbeider             |       | 194   | 4.1%       |
| Selvstendig næringsdrivende |       | 183   | 3.9%       |

*Warning: these figures indicate the number of cases found in the data file. They cannot be interpreted as summary statistics of the population of interest.*

| # r7pad7_profile1_1: Characteristic for profile 1: age. Background variable for r7pad7.                                                                     |                                                                                                                       |       |                              |
|-------------------------------------------------------------------------------------------------------------------------------------------------------------|-----------------------------------------------------------------------------------------------------------------------|-------|------------------------------|
| Information                                                                                                                                                 | [Type= discrete] [Format=character] [Missing=*]                                                                       |       |                              |
| Statistics [NW/ W]                                                                                                                                          | [Valid=4689 /-] [Invalid=0 /-]                                                                                        |       |                              |
| Interviewer's instructions                                                                                                                                  | [Background variable. Stores a randomly selected age for profile 1 in conjunction experiment R7PAD7.]                 |       |                              |
| Value                                                                                                                                                       | Label                                                                                                                 | Cases | Percentage                   |
|                                                                                                                                                             |                                                                                                                       | 3597  | <div><div></div></div> 76.7% |
| 22 år                                                                                                                                                       |                                                                                                                       | 149   | <div><div></div></div> 3.2%  |
| 30 år                                                                                                                                                       |                                                                                                                       | 159   | <div><div></div></div> 3.4%  |
| 40 år                                                                                                                                                       |                                                                                                                       | 147   | <div><div></div></div> 3.1%  |
| 50 år                                                                                                                                                       |                                                                                                                       | 188   | <div><div></div></div> 4.0%  |
| 60 år                                                                                                                                                       |                                                                                                                       | 165   | <div><div></div></div> 3.5%  |
| 70 år                                                                                                                                                       |                                                                                                                       | 130   | <div><div></div></div> 2.8%  |
| 80 år                                                                                                                                                       |                                                                                                                       | 154   | <div><div></div></div> 3.3%  |
| Warning: these figures indicate the number of cases found in the data file. They cannot be interpreted as summary statistics of the population of interest. |                                                                                                                       |       |                              |
| # r7pad7_profile1_2: Characteristic for profile 1: gender. Background variable for r7pad7.                                                                  |                                                                                                                       |       |                              |
| Information                                                                                                                                                 | [Type= discrete] [Format=character] [Missing=*]                                                                       |       |                              |
| Statistics [NW/ W]                                                                                                                                          | [Valid=4689 /-] [Invalid=0 /-]                                                                                        |       |                              |
| Interviewer's instructions                                                                                                                                  | [Background variable. Stores a randomly selected sex for profile 1 in conjunction experiment R7PAD7.]                 |       |                              |
| Value                                                                                                                                                       | Label                                                                                                                 | Cases | Percentage                   |
|                                                                                                                                                             |                                                                                                                       | 3597  | <div><div></div></div> 76.7% |
| Kvinne                                                                                                                                                      |                                                                                                                       | 528   | <div><div></div></div> 11.3% |
| Mann                                                                                                                                                        |                                                                                                                       | 564   | <div><div></div></div> 12.0% |
| Warning: these figures indicate the number of cases found in the data file. They cannot be interpreted as summary statistics of the population of interest. |                                                                                                                       |       |                              |
| # r7pad7_profile1_3: Characteristic for profile 1: from. Background variable for r7pad7.                                                                    |                                                                                                                       |       |                              |
| Information                                                                                                                                                 | [Type= discrete] [Format=character] [Missing=*]                                                                       |       |                              |
| Statistics [NW/ W]                                                                                                                                          | [Valid=4689 /-] [Invalid=0 /-]                                                                                        |       |                              |
| Interviewer's instructions                                                                                                                                  | [Background variable. Stores a randomly selected geographical region for profile 1 in conjunction experiment R7PAD7.] |       |                              |
| Value                                                                                                                                                       | Label                                                                                                                 | Cases | Percentage                   |
|                                                                                                                                                             |                                                                                                                       | 3597  | <div><div></div></div> 76.7% |
| Midt-Norge                                                                                                                                                  |                                                                                                                       | 161   | <div><div></div></div> 3.4%  |
| Nord-Norge                                                                                                                                                  |                                                                                                                       | 196   | <div><div></div></div> 4.2%  |
| Oslo                                                                                                                                                        |                                                                                                                       | 195   | <div><div></div></div> 4.2%  |
| Sørlandet                                                                                                                                                   |                                                                                                                       | 174   | <div><div></div></div> 3.7%  |
| Vestlandet                                                                                                                                                  |                                                                                                                       | 178   | <div><div></div></div> 3.8%  |
| Østlandet                                                                                                                                                   |                                                                                                                       | 188   | <div><div></div></div> 4.0%  |
| Warning: these figures indicate the number of cases found in the data file. They cannot be interpreted as summary statistics of the population of interest. |                                                                                                                       |       |                              |
| # r7pad7_profile1_4: Characteristic for profile 1: relationship status. Background variable for r7pad7.                                                     |                                                                                                                       |       |                              |
| Information                                                                                                                                                 | [Type= discrete] [Format=character] [Missing=*]                                                                       |       |                              |
| Statistics [NW/ W]                                                                                                                                          | [Valid=4689 /-] [Invalid=0 /-]                                                                                        |       |                              |
| Interviewer's instructions                                                                                                                                  | [Background variable. Stores a randomly selected relationship status for profile 1 in conjunction experiment R7PAD7.] |       |                              |
| Value                                                                                                                                                       | Label                                                                                                                 | Cases | Percentage                   |
|                                                                                                                                                             |                                                                                                                       | 3597  | <div><div></div></div> 76.7% |
| Bor alene                                                                                                                                                   |                                                                                                                       | 368   | <div><div></div></div> 7.8%  |
| Gift                                                                                                                                                        |                                                                                                                       | 380   | <div><div></div></div> 8.1%  |

| # r7pad7_profile1_4: Characteristic for profile 1: relationship status. Background variable for r7pad7.                                                     |                                                                                                                         |       |            |
|-------------------------------------------------------------------------------------------------------------------------------------------------------------|-------------------------------------------------------------------------------------------------------------------------|-------|------------|
| Value                                                                                                                                                       | Label                                                                                                                   | Cases | Percentage |
| Samboer                                                                                                                                                     |                                                                                                                         | 344   | 7.3%       |
| Warning: these figures indicate the number of cases found in the data file. They cannot be interpreted as summary statistics of the population of interest. |                                                                                                                         |       |            |
| # r7pad7_profile1_5: Characteristic for profile 1: education. Background variable for r7pad7.                                                               |                                                                                                                         |       |            |
| Information                                                                                                                                                 | [Type= discrete] [Format=character] [Missing=*]                                                                         |       |            |
| Statistics [NW/ W]                                                                                                                                          | [Valid=4689 /-] [Invalid=0 /-]                                                                                          |       |            |
| Interviewer's instructions                                                                                                                                  | [Background variable. Stores a randomly selected education level for profile 1 in conjunction experiment R7PAD7.]       |       |            |
| Value                                                                                                                                                       | Label                                                                                                                   | Cases | Percentage |
|                                                                                                                                                             |                                                                                                                         | 3597  | 76.7%      |
| Doktorgrad                                                                                                                                                  |                                                                                                                         | 262   | 5.6%       |
| Grunnskole                                                                                                                                                  |                                                                                                                         | 256   | 5.5%       |
| Universitet                                                                                                                                                 |                                                                                                                         | 281   | 6.0%       |
| Videregående                                                                                                                                                |                                                                                                                         | 293   | 6.2%       |
| Warning: these figures indicate the number of cases found in the data file. They cannot be interpreted as summary statistics of the population of interest. |                                                                                                                         |       |            |
| # r7pad7_profile1_6: Characteristic for profile 1: religion. Background variable for r7pad7.                                                                |                                                                                                                         |       |            |
| Information                                                                                                                                                 | [Type= discrete] [Format=character] [Missing=*]                                                                         |       |            |
| Statistics [NW/ W]                                                                                                                                          | [Valid=4689 /-] [Invalid=0 /-]                                                                                          |       |            |
| Interviewer's instructions                                                                                                                                  | [Background variable. Stores a randomly selected religious affiliation for profile 1 in conjunction experiment R7PAD7.] |       |            |
| Value                                                                                                                                                       | Label                                                                                                                   | Cases | Percentage |
|                                                                                                                                                             |                                                                                                                         | 3597  | 76.7%      |
| Ingen                                                                                                                                                       |                                                                                                                         | 368   | 7.8%       |
| Islam                                                                                                                                                       |                                                                                                                         | 376   | 8.0%       |
| Kristendom                                                                                                                                                  |                                                                                                                         | 348   | 7.4%       |
| Warning: these figures indicate the number of cases found in the data file. They cannot be interpreted as summary statistics of the population of interest. |                                                                                                                         |       |            |
| # r7pad7_profile1_7: Characteristic for profile 1: work experience. Background variable for r7pad7.                                                         |                                                                                                                         |       |            |
| Information                                                                                                                                                 | [Type= discrete] [Format=character] [Missing=*]                                                                         |       |            |
| Statistics [NW/ W]                                                                                                                                          | [Valid=4689 /-] [Invalid=0 /-]                                                                                          |       |            |
| Interviewer's instructions                                                                                                                                  | [Background variable. Stores a randomly selected profession for profile 1 in conjunction experiment R7PAD7.]            |       |            |
| Value                                                                                                                                                       | Label                                                                                                                   | Cases | Percentage |
|                                                                                                                                                             |                                                                                                                         | 3597  | 76.7%      |
| Bonde                                                                                                                                                       |                                                                                                                         | 189   | 4.0%       |
| IT-konsulent                                                                                                                                                |                                                                                                                         | 171   | 3.6%       |
| Ingen                                                                                                                                                       |                                                                                                                         | 166   | 3.5%       |
| Oljearbeider                                                                                                                                                |                                                                                                                         | 176   | 3.8%       |
| Omsorgsarbeider                                                                                                                                             |                                                                                                                         | 183   | 3.9%       |
| Selvstendig næringsdrivende                                                                                                                                 |                                                                                                                         | 207   | 4.4%       |
| Warning: these figures indicate the number of cases found in the data file. They cannot be interpreted as summary statistics of the population of interest. |                                                                                                                         |       |            |
| # r7pad7_profile2_1: Characteristic for profile 2: age. Background variable for r7pad7.                                                                     |                                                                                                                         |       |            |
| Information                                                                                                                                                 | [Type= discrete] [Format=character] [Missing=*]                                                                         |       |            |
| Statistics [NW/ W]                                                                                                                                          | [Valid=4689 /-] [Invalid=0 /-]                                                                                          |       |            |
| Interviewer's instructions                                                                                                                                  | [Background variable. Stores a randomly selected age for profile 2 in conjunction experiment R7PAD7.]                   |       |            |

| # r7pad7_profile2_1: Characteristic for profile 2: age. Background variable for r7pad7.                                                                     |                                                                                                                       |       |                              |
|-------------------------------------------------------------------------------------------------------------------------------------------------------------|-----------------------------------------------------------------------------------------------------------------------|-------|------------------------------|
| Value                                                                                                                                                       | Label                                                                                                                 | Cases | Percentage                   |
|                                                                                                                                                             |                                                                                                                       | 3597  | <div><div></div></div> 76.7% |
| 22 år                                                                                                                                                       |                                                                                                                       | 164   | <div><div></div></div> 3.5%  |
| 30 år                                                                                                                                                       |                                                                                                                       | 153   | <div><div></div></div> 3.3%  |
| 40 år                                                                                                                                                       |                                                                                                                       | 166   | <div><div></div></div> 3.5%  |
| 50 år                                                                                                                                                       |                                                                                                                       | 141   | <div><div></div></div> 3.0%  |
| 60 år                                                                                                                                                       |                                                                                                                       | 149   | <div><div></div></div> 3.2%  |
| 70 år                                                                                                                                                       |                                                                                                                       | 157   | <div><div></div></div> 3.3%  |
| 80 år                                                                                                                                                       |                                                                                                                       | 162   | <div><div></div></div> 3.5%  |
| Warning: these figures indicate the number of cases found in the data file. They cannot be interpreted as summary statistics of the population of interest. |                                                                                                                       |       |                              |
| # r7pad7_profile2_2: Characteristic for profile 2: gender. Background variable for r7pad7.                                                                  |                                                                                                                       |       |                              |
| Information                                                                                                                                                 | [Type= discrete] [Format=character] [Missing=*]                                                                       |       |                              |
| Statistics [NW/ W]                                                                                                                                          | [Valid=4689 /-] [Invalid=0 /-]                                                                                        |       |                              |
| Interviewer's instructions                                                                                                                                  | [Background variable. Stores a randomly selected sex for profile 2 in conjunction experiment R7PAD7.]                 |       |                              |
| Value                                                                                                                                                       | Label                                                                                                                 | Cases | Percentage                   |
|                                                                                                                                                             |                                                                                                                       | 3597  | <div><div></div></div> 76.7% |
| Kvinne                                                                                                                                                      |                                                                                                                       | 553   | <div><div></div></div> 11.8% |
| Mann                                                                                                                                                        |                                                                                                                       | 539   | <div><div></div></div> 11.5% |
| Warning: these figures indicate the number of cases found in the data file. They cannot be interpreted as summary statistics of the population of interest. |                                                                                                                       |       |                              |
| # r7pad7_profile2_3: Characteristic for profile 2: from. Background variable for r7pad7.                                                                    |                                                                                                                       |       |                              |
| Information                                                                                                                                                 | [Type= discrete] [Format=character] [Missing=*]                                                                       |       |                              |
| Statistics [NW/ W]                                                                                                                                          | [Valid=4689 /-] [Invalid=0 /-]                                                                                        |       |                              |
| Interviewer's instructions                                                                                                                                  | [Background variable. Stores a randomly selected geographical region for profile 2 in conjunction experiment R7PAD7.] |       |                              |
| Value                                                                                                                                                       | Label                                                                                                                 | Cases | Percentage                   |
|                                                                                                                                                             |                                                                                                                       | 3597  | <div><div></div></div> 76.7% |
| Midt-Norge                                                                                                                                                  |                                                                                                                       | 182   | <div><div></div></div> 3.9%  |
| Nord-Norge                                                                                                                                                  |                                                                                                                       | 207   | <div><div></div></div> 4.4%  |
| Oslo                                                                                                                                                        |                                                                                                                       | 174   | <div><div></div></div> 3.7%  |
| Sørlandet                                                                                                                                                   |                                                                                                                       | 177   | <div><div></div></div> 3.8%  |
| Vestlandet                                                                                                                                                  |                                                                                                                       | 163   | <div><div></div></div> 3.5%  |
| Østlandet                                                                                                                                                   |                                                                                                                       | 189   | <div><div></div></div> 4.0%  |
| Warning: these figures indicate the number of cases found in the data file. They cannot be interpreted as summary statistics of the population of interest. |                                                                                                                       |       |                              |
| # r7pad7_profile2_4: Characteristic for profile 2: relationship status. Background variable for r7pad7.                                                     |                                                                                                                       |       |                              |
| Information                                                                                                                                                 | [Type= discrete] [Format=character] [Missing=*]                                                                       |       |                              |
| Statistics [NW/ W]                                                                                                                                          | [Valid=4689 /-] [Invalid=0 /-]                                                                                        |       |                              |
| Interviewer's instructions                                                                                                                                  | [Background variable. Stores a randomly selected relationship status for profile 2 in conjunction experiment R7PAD7.] |       |                              |
| Value                                                                                                                                                       | Label                                                                                                                 | Cases | Percentage                   |
|                                                                                                                                                             |                                                                                                                       | 3597  | <div><div></div></div> 76.7% |
| Bor alene                                                                                                                                                   |                                                                                                                       | 361   | <div><div></div></div> 7.7%  |
| Gift                                                                                                                                                        |                                                                                                                       | 364   | <div><div></div></div> 7.8%  |
| Samboer                                                                                                                                                     |                                                                                                                       | 367   | <div><div></div></div> 7.8%  |
| Warning: these figures indicate the number of cases found in the data file. They cannot be interpreted as summary statistics of the population of interest. |                                                                                                                       |       |                              |



| # r7pad7_profile2_5: Characteristic for profile 2: education. Background variable for r7pad7.                                                               |                                                                                                                         |       |                              |
|-------------------------------------------------------------------------------------------------------------------------------------------------------------|-------------------------------------------------------------------------------------------------------------------------|-------|------------------------------|
| Information                                                                                                                                                 | [Type= discrete] [Format=character] [Missing=*]                                                                         |       |                              |
| Statistics [NW/ W]                                                                                                                                          | [Valid=4689 /-] [Invalid=0 /-]                                                                                          |       |                              |
| Interviewer's instructions                                                                                                                                  | [Background variable. Stores a randomly selected education level for profile 2 in conjunction experiment R7PAD7.]       |       |                              |
| Value                                                                                                                                                       | Label                                                                                                                   | Cases | Percentage                   |
|                                                                                                                                                             |                                                                                                                         | 3597  | <div><div></div></div> 76.7% |
| Doktorgrad                                                                                                                                                  |                                                                                                                         | 227   | <div><div></div></div> 4.8%  |
| Grunnskole                                                                                                                                                  |                                                                                                                         | 274   | <div><div></div></div> 5.8%  |
| Universitet                                                                                                                                                 |                                                                                                                         | 301   | <div><div></div></div> 6.4%  |
| Videregående                                                                                                                                                |                                                                                                                         | 290   | <div><div></div></div> 6.2%  |
| Warning: these figures indicate the number of cases found in the data file. They cannot be interpreted as summary statistics of the population of interest. |                                                                                                                         |       |                              |
| # r7pad7_profile2_6: Characteristic for profile 2: religion. Background variable for r7pad7.                                                                |                                                                                                                         |       |                              |
| Information                                                                                                                                                 | [Type= discrete] [Format=character] [Missing=*]                                                                         |       |                              |
| Statistics [NW/ W]                                                                                                                                          | [Valid=4689 /-] [Invalid=0 /-]                                                                                          |       |                              |
| Interviewer's instructions                                                                                                                                  | [Background variable. Stores a randomly selected religious affiliation for profile 2 in conjunction experiment R7PAD7.] |       |                              |
| Value                                                                                                                                                       | Label                                                                                                                   | Cases | Percentage                   |
|                                                                                                                                                             |                                                                                                                         | 3597  | <div><div></div></div> 76.7% |
| Ingen                                                                                                                                                       |                                                                                                                         | 358   | <div><div></div></div> 7.6%  |
| Islam                                                                                                                                                       |                                                                                                                         | 357   | <div><div></div></div> 7.6%  |
| Kristendom                                                                                                                                                  |                                                                                                                         | 377   | <div><div></div></div> 8.0%  |
| Warning: these figures indicate the number of cases found in the data file. They cannot be interpreted as summary statistics of the population of interest. |                                                                                                                         |       |                              |
| # r7pad7_profile2_7: Characteristic for profile 2: work experiencee. Background variable for r7pad7.                                                        |                                                                                                                         |       |                              |
| Information                                                                                                                                                 | [Type= discrete] [Format=character] [Missing=*]                                                                         |       |                              |
| Statistics [NW/ W]                                                                                                                                          | [Valid=4689 /-] [Invalid=0 /-]                                                                                          |       |                              |
| Interviewer's instructions                                                                                                                                  | [Background variable. Stores a randomly selected profession for profile 2 in conjunction experiment R7PAD7.]            |       |                              |
| Value                                                                                                                                                       | Label                                                                                                                   | Cases | Percentage                   |
|                                                                                                                                                             |                                                                                                                         | 3597  | <div><div></div></div> 76.7% |
| Bonde                                                                                                                                                       |                                                                                                                         | 163   | <div><div></div></div> 3.5%  |
| IT-konsulent                                                                                                                                                |                                                                                                                         | 188   | <div><div></div></div> 4.0%  |
| Ingen                                                                                                                                                       |                                                                                                                         | 158   | <div><div></div></div> 3.4%  |
| Oljearbeider                                                                                                                                                |                                                                                                                         | 207   | <div><div></div></div> 4.4%  |
| Omsorgsarbeider                                                                                                                                             |                                                                                                                         | 179   | <div><div></div></div> 3.8%  |
| Selvstendig næringsdrivende                                                                                                                                 |                                                                                                                         | 197   | <div><div></div></div> 4.2%  |
| Warning: these figures indicate the number of cases found in the data file. They cannot be interpreted as summary statistics of the population of interest. |                                                                                                                         |       |                              |
| # r7pad8_profile1_1: Characteristic for profile 1: age. Background variable for r7pad8.                                                                     |                                                                                                                         |       |                              |
| Information                                                                                                                                                 | [Type= discrete] [Format=character] [Missing=*]                                                                         |       |                              |
| Statistics [NW/ W]                                                                                                                                          | [Valid=4689 /-] [Invalid=0 /-]                                                                                          |       |                              |
| Interviewer's instructions                                                                                                                                  | [Background variable. Stores a randomly selected age for profile 1 in conjunction experiment R7PAD8.]                   |       |                              |
| Value                                                                                                                                                       | Label                                                                                                                   | Cases | Percentage                   |
|                                                                                                                                                             |                                                                                                                         | 3597  | <div><div></div></div> 76.7% |
| 22 år                                                                                                                                                       |                                                                                                                         | 141   | <div><div></div></div> 3.0%  |
| 30 år                                                                                                                                                       |                                                                                                                         | 176   | <div><div></div></div> 3.8%  |
| 40 år                                                                                                                                                       |                                                                                                                         | 133   | <div><div></div></div> 2.8%  |

| # r7pad8_profile1_1: Characteristic for profile 1: age. Background variable for r7pad8.                                                                     |                                                                                                                       |       |                              |
|-------------------------------------------------------------------------------------------------------------------------------------------------------------|-----------------------------------------------------------------------------------------------------------------------|-------|------------------------------|
| Value                                                                                                                                                       | Label                                                                                                                 | Cases | Percentage                   |
| 50 år                                                                                                                                                       |                                                                                                                       | 146   | <div><div></div></div> 3.1%  |
| 60 år                                                                                                                                                       |                                                                                                                       | 162   | <div><div></div></div> 3.5%  |
| 70 år                                                                                                                                                       |                                                                                                                       | 177   | <div><div></div></div> 3.8%  |
| 80 år                                                                                                                                                       |                                                                                                                       | 157   | <div><div></div></div> 3.3%  |
| Warning: these figures indicate the number of cases found in the data file. They cannot be interpreted as summary statistics of the population of interest. |                                                                                                                       |       |                              |
| # r7pad8_profile1_2: Characteristic for profile 1: gender. Background variable for r7pad8.                                                                  |                                                                                                                       |       |                              |
| Information                                                                                                                                                 | [Type= discrete] [Format=character] [Missing=*]                                                                       |       |                              |
| Statistics [NW/ W]                                                                                                                                          | [Valid=4689 /-] [Invalid=0 /-]                                                                                        |       |                              |
| Interviewer's instructions                                                                                                                                  | [Background variable. Stores a randomly selected sex for profile 1 in conjunction experiment R7PAD8.]                 |       |                              |
| Value                                                                                                                                                       | Label                                                                                                                 | Cases | Percentage                   |
|                                                                                                                                                             |                                                                                                                       | 3597  | <div><div></div></div> 76.7% |
| Kvinne                                                                                                                                                      |                                                                                                                       | 564   | <div><div></div></div> 12.0% |
| Mann                                                                                                                                                        |                                                                                                                       | 528   | <div><div></div></div> 11.3% |
| Warning: these figures indicate the number of cases found in the data file. They cannot be interpreted as summary statistics of the population of interest. |                                                                                                                       |       |                              |
| # r7pad8_profile1_3: Characteristic for profile 1: from. Background variable for r7pad8.                                                                    |                                                                                                                       |       |                              |
| Information                                                                                                                                                 | [Type= discrete] [Format=character] [Missing=*]                                                                       |       |                              |
| Statistics [NW/ W]                                                                                                                                          | [Valid=4689 /-] [Invalid=0 /-]                                                                                        |       |                              |
| Interviewer's instructions                                                                                                                                  | [Background variable. Stores a randomly selected geographical region for profile 1 in conjunction experiment R7PAD8.] |       |                              |
| Value                                                                                                                                                       | Label                                                                                                                 | Cases | Percentage                   |
|                                                                                                                                                             |                                                                                                                       | 3597  | <div><div></div></div> 76.7% |
| Midt-Norge                                                                                                                                                  |                                                                                                                       | 199   | <div><div></div></div> 4.2%  |
| Nord-Norge                                                                                                                                                  |                                                                                                                       | 189   | <div><div></div></div> 4.0%  |
| Oslo                                                                                                                                                        |                                                                                                                       | 165   | <div><div></div></div> 3.5%  |
| Sørlandet                                                                                                                                                   |                                                                                                                       | 193   | <div><div></div></div> 4.1%  |
| Vestlandet                                                                                                                                                  |                                                                                                                       | 164   | <div><div></div></div> 3.5%  |
| Østlandet                                                                                                                                                   |                                                                                                                       | 182   | <div><div></div></div> 3.9%  |
| Warning: these figures indicate the number of cases found in the data file. They cannot be interpreted as summary statistics of the population of interest. |                                                                                                                       |       |                              |
| # r7pad8_profile1_4: Characteristic for profile 1: relationship status. Background variable for r7pad8.                                                     |                                                                                                                       |       |                              |
| Information                                                                                                                                                 | [Type= discrete] [Format=character] [Missing=*]                                                                       |       |                              |
| Statistics [NW/ W]                                                                                                                                          | [Valid=4689 /-] [Invalid=0 /-]                                                                                        |       |                              |
| Interviewer's instructions                                                                                                                                  | [Background variable. Stores a randomly selected relationship status for profile 1 in conjunction experiment R7PAD8.] |       |                              |
| Value                                                                                                                                                       | Label                                                                                                                 | Cases | Percentage                   |
|                                                                                                                                                             |                                                                                                                       | 3597  | <div><div></div></div> 76.7% |
| Bor alene                                                                                                                                                   |                                                                                                                       | 383   | <div><div></div></div> 8.2%  |
| Gift                                                                                                                                                        |                                                                                                                       | 353   | <div><div></div></div> 7.5%  |
| Samboer                                                                                                                                                     |                                                                                                                       | 356   | <div><div></div></div> 7.6%  |
| Warning: these figures indicate the number of cases found in the data file. They cannot be interpreted as summary statistics of the population of interest. |                                                                                                                       |       |                              |
| # r7pad8_profile1_5: Characteristic for profile 1: education. Background variable for r7pad8.                                                               |                                                                                                                       |       |                              |
| Information                                                                                                                                                 | [Type= discrete] [Format=character] [Missing=*]                                                                       |       |                              |
| Statistics [NW/ W]                                                                                                                                          | [Valid=4689 /-] [Invalid=0 /-]                                                                                        |       |                              |
| Interviewer's instructions                                                                                                                                  | [Background variable. Stores a randomly selected education level for profile 1 in conjunction experiment R7PAD8.]     |       |                              |

| # r7pad8_profile1_5: Characteristic for profile 1: education. Background variable for r7pad8.                                                               |                                                                                                                         |       |                              |
|-------------------------------------------------------------------------------------------------------------------------------------------------------------|-------------------------------------------------------------------------------------------------------------------------|-------|------------------------------|
| Value                                                                                                                                                       | Label                                                                                                                   | Cases | Percentage                   |
|                                                                                                                                                             |                                                                                                                         | 3597  | <div><div></div></div> 76.7% |
| Doktorgrad                                                                                                                                                  |                                                                                                                         | 268   | <div><div></div></div> 5.7%  |
| Grunnskole                                                                                                                                                  |                                                                                                                         | 303   | <div><div></div></div> 6.5%  |
| Universitet                                                                                                                                                 |                                                                                                                         | 257   | <div><div></div></div> 5.5%  |
| Videregående                                                                                                                                                |                                                                                                                         | 264   | <div><div></div></div> 5.6%  |
| Warning: these figures indicate the number of cases found in the data file. They cannot be interpreted as summary statistics of the population of interest. |                                                                                                                         |       |                              |
| # r7pad8_profile1_6: Characteristic for profile 1: religion. Background variable for r7pad8.                                                                |                                                                                                                         |       |                              |
| Information                                                                                                                                                 | [Type= discrete] [Format=character] [Missing=*]                                                                         |       |                              |
| Statistics [NW/ W]                                                                                                                                          | [Valid=4689 /-] [Invalid=0 /-]                                                                                          |       |                              |
| Interviewer's instructions                                                                                                                                  | [Background variable. Stores a randomly selected religious affiliation for profile 1 in conjunction experiment R7PAD8.] |       |                              |
| Value                                                                                                                                                       | Label                                                                                                                   | Cases | Percentage                   |
|                                                                                                                                                             |                                                                                                                         | 3597  | <div><div></div></div> 76.7% |
| Ingen                                                                                                                                                       |                                                                                                                         | 346   | <div><div></div></div> 7.4%  |
| Islam                                                                                                                                                       |                                                                                                                         | 377   | <div><div></div></div> 8.0%  |
| Kristendom                                                                                                                                                  |                                                                                                                         | 369   | <div><div></div></div> 7.9%  |
| Warning: these figures indicate the number of cases found in the data file. They cannot be interpreted as summary statistics of the population of interest. |                                                                                                                         |       |                              |
| # r7pad8_profile1_7: Characteristic for profile 1: work experiencee. Background variable for r7pad8.                                                        |                                                                                                                         |       |                              |
| Information                                                                                                                                                 | [Type= discrete] [Format=character] [Missing=*]                                                                         |       |                              |
| Statistics [NW/ W]                                                                                                                                          | [Valid=4689 /-] [Invalid=0 /-]                                                                                          |       |                              |
| Interviewer's instructions                                                                                                                                  | [Background variable. Stores a randomly selected profession for profile 1 in conjunction experiment R7PAD8.]            |       |                              |
| Value                                                                                                                                                       | Label                                                                                                                   | Cases | Percentage                   |
|                                                                                                                                                             |                                                                                                                         | 3597  | <div><div></div></div> 76.7% |
| Bonde                                                                                                                                                       |                                                                                                                         | 180   | <div><div></div></div> 3.8%  |
| IT-konsulent                                                                                                                                                |                                                                                                                         | 210   | <div><div></div></div> 4.5%  |
| Ingen                                                                                                                                                       |                                                                                                                         | 180   | <div><div></div></div> 3.8%  |
| Oljearbeider                                                                                                                                                |                                                                                                                         | 176   | <div><div></div></div> 3.8%  |
| Omsorgsarbeider                                                                                                                                             |                                                                                                                         | 164   | <div><div></div></div> 3.5%  |
| Selvstendig næringsdrivende                                                                                                                                 |                                                                                                                         | 182   | <div><div></div></div> 3.9%  |
| Warning: these figures indicate the number of cases found in the data file. They cannot be interpreted as summary statistics of the population of interest. |                                                                                                                         |       |                              |
| # r7pad8_profile2_1: Characteristic for profile 2: age. Background variable for r7pad8.                                                                     |                                                                                                                         |       |                              |
| Information                                                                                                                                                 | [Type= discrete] [Format=character] [Missing=*]                                                                         |       |                              |
| Statistics [NW/ W]                                                                                                                                          | [Valid=4689 /-] [Invalid=0 /-]                                                                                          |       |                              |
| Interviewer's instructions                                                                                                                                  | [Background variable. Stores a randomly selected age for profile 2 in conjunction experiment R7PAD8.]                   |       |                              |
| Value                                                                                                                                                       | Label                                                                                                                   | Cases | Percentage                   |
|                                                                                                                                                             |                                                                                                                         | 3597  | <div><div></div></div> 76.7% |
| 22 år                                                                                                                                                       |                                                                                                                         | 141   | <div><div></div></div> 3.0%  |
| 30 år                                                                                                                                                       |                                                                                                                         | 156   | <div><div></div></div> 3.3%  |
| 40 år                                                                                                                                                       |                                                                                                                         | 146   | <div><div></div></div> 3.1%  |
| 50 år                                                                                                                                                       |                                                                                                                         | 158   | <div><div></div></div> 3.4%  |
| 60 år                                                                                                                                                       |                                                                                                                         | 147   | <div><div></div></div> 3.1%  |
| 70 år                                                                                                                                                       |                                                                                                                         | 164   | <div><div></div></div> 3.5%  |
| 80 år                                                                                                                                                       |                                                                                                                         | 180   | <div><div></div></div> 3.8%  |

|                                                                                                                                                             |                                                                                                                       |       |                              |
|-------------------------------------------------------------------------------------------------------------------------------------------------------------|-----------------------------------------------------------------------------------------------------------------------|-------|------------------------------|
| # r7pad8_profile2_1: Characteristic for profile 2: age. Background variable for r7pad8.                                                                     |                                                                                                                       |       |                              |
| Warning: these figures indicate the number of cases found in the data file. They cannot be interpreted as summary statistics of the population of interest. |                                                                                                                       |       |                              |
| # r7pad8_profile2_2: Characteristic for profile 2: gender. Background variable for r7pad8.                                                                  |                                                                                                                       |       |                              |
| Information                                                                                                                                                 | [Type= discrete] [Format=character] [Missing=*]                                                                       |       |                              |
| Statistics [NW/ W]                                                                                                                                          | [Valid=4689 /-] [Invalid=0 /-]                                                                                        |       |                              |
| Interviewer's instructions                                                                                                                                  | [Background variable. Stores a randomly selected sex for profile 2 in conjunction experiment R7PAD8.]                 |       |                              |
| Value                                                                                                                                                       | Label                                                                                                                 | Cases | Percentage                   |
|                                                                                                                                                             |                                                                                                                       | 3597  | <div><div></div></div> 76.7% |
| Kvinne                                                                                                                                                      |                                                                                                                       | 550   | <div><div></div></div> 11.7% |
| Mann                                                                                                                                                        |                                                                                                                       | 542   | <div><div></div></div> 11.6% |
| Warning: these figures indicate the number of cases found in the data file. They cannot be interpreted as summary statistics of the population of interest. |                                                                                                                       |       |                              |
| # r7pad8_profile2_3: Characteristic for profile 2: from. Background variable for r7pad8.                                                                    |                                                                                                                       |       |                              |
| Information                                                                                                                                                 | [Type= discrete] [Format=character] [Missing=*]                                                                       |       |                              |
| Statistics [NW/ W]                                                                                                                                          | [Valid=4689 /-] [Invalid=0 /-]                                                                                        |       |                              |
| Interviewer's instructions                                                                                                                                  | [Background variable. Stores a randomly selected geographical region for profile 2 in conjunction experiment R7PAD8.] |       |                              |
| Value                                                                                                                                                       | Label                                                                                                                 | Cases | Percentage                   |
|                                                                                                                                                             |                                                                                                                       | 3597  | <div><div></div></div> 76.7% |
| Midt-Norge                                                                                                                                                  |                                                                                                                       | 179   | <div><div></div></div> 3.8%  |
| Nord-Norge                                                                                                                                                  |                                                                                                                       | 155   | <div><div></div></div> 3.3%  |
| Oslo                                                                                                                                                        |                                                                                                                       | 163   | <div><div></div></div> 3.5%  |
| Sørlandet                                                                                                                                                   |                                                                                                                       | 192   | <div><div></div></div> 4.1%  |
| Vestlandet                                                                                                                                                  |                                                                                                                       | 203   | <div><div></div></div> 4.3%  |
| Østlandet                                                                                                                                                   |                                                                                                                       | 200   | <div><div></div></div> 4.3%  |
| Warning: these figures indicate the number of cases found in the data file. They cannot be interpreted as summary statistics of the population of interest. |                                                                                                                       |       |                              |
| # r7pad8_profile2_4: Characteristic for profile 2: relationship status. Background variable for r7pad8.                                                     |                                                                                                                       |       |                              |
| Information                                                                                                                                                 | [Type= discrete] [Format=character] [Missing=*]                                                                       |       |                              |
| Statistics [NW/ W]                                                                                                                                          | [Valid=4689 /-] [Invalid=0 /-]                                                                                        |       |                              |
| Interviewer's instructions                                                                                                                                  | [Background variable. Stores a randomly selected relationship status for profile 2 in conjunction experiment R7PAD8.] |       |                              |
| Value                                                                                                                                                       | Label                                                                                                                 | Cases | Percentage                   |
|                                                                                                                                                             |                                                                                                                       | 3597  | <div><div></div></div> 76.7% |
| Bor alene                                                                                                                                                   |                                                                                                                       | 376   | <div><div></div></div> 8.0%  |
| Gift                                                                                                                                                        |                                                                                                                       | 355   | <div><div></div></div> 7.6%  |
| Samboer                                                                                                                                                     |                                                                                                                       | 361   | <div><div></div></div> 7.7%  |
| Warning: these figures indicate the number of cases found in the data file. They cannot be interpreted as summary statistics of the population of interest. |                                                                                                                       |       |                              |
| # r7pad8_profile2_5: Characteristic for profile 2: education. Background variable for r7pad8.                                                               |                                                                                                                       |       |                              |
| Information                                                                                                                                                 | [Type= discrete] [Format=character] [Missing=*]                                                                       |       |                              |
| Statistics [NW/ W]                                                                                                                                          | [Valid=4689 /-] [Invalid=0 /-]                                                                                        |       |                              |
| Interviewer's instructions                                                                                                                                  | [Background variable. Stores a randomly selected education level for profile 2 in conjunction experiment R7PAD8.]     |       |                              |
| Value                                                                                                                                                       | Label                                                                                                                 | Cases | Percentage                   |
|                                                                                                                                                             |                                                                                                                       | 3597  | <div><div></div></div> 76.7% |
| Doktorgrad                                                                                                                                                  |                                                                                                                       | 270   | <div><div></div></div> 5.8%  |
| Grunnskole                                                                                                                                                  |                                                                                                                       | 259   | <div><div></div></div> 5.5%  |
| Universitet                                                                                                                                                 |                                                                                                                       | 283   | <div><div></div></div> 6.0%  |
| Videregående                                                                                                                                                |                                                                                                                       | 280   | <div><div></div></div> 6.0%  |

|                                                                                                                                                                    |                                                                                                                                                                                                                                                                                                                                                                                        |              |                   |
|--------------------------------------------------------------------------------------------------------------------------------------------------------------------|----------------------------------------------------------------------------------------------------------------------------------------------------------------------------------------------------------------------------------------------------------------------------------------------------------------------------------------------------------------------------------------|--------------|-------------------|
| <b># r7pad8_profile2_5: Characteristic for profile 2: education. Background variable for r7pad8.</b>                                                               |                                                                                                                                                                                                                                                                                                                                                                                        |              |                   |
| <i>Warning: these figures indicate the number of cases found in the data file. They cannot be interpreted as summary statistics of the population of interest.</i> |                                                                                                                                                                                                                                                                                                                                                                                        |              |                   |
| <b># r7pad8_profile2_6: Characteristic for profile 2: religion. Background variable for r7pad8.</b>                                                                |                                                                                                                                                                                                                                                                                                                                                                                        |              |                   |
| <b>Information</b>                                                                                                                                                 | [Type= discrete] [Format=character] [Missing=*]                                                                                                                                                                                                                                                                                                                                        |              |                   |
| <b>Statistics [NW/ W]</b>                                                                                                                                          | [Valid=4689 /-] [Invalid=0 /-]                                                                                                                                                                                                                                                                                                                                                         |              |                   |
| <b>Interviewer's instructions</b>                                                                                                                                  | [Background variable. Stores a randomly selected religious affiliation for profile 2 in conjunction experiment R7PAD8.]                                                                                                                                                                                                                                                                |              |                   |
| <b>Value</b>                                                                                                                                                       | <b>Label</b>                                                                                                                                                                                                                                                                                                                                                                           | <b>Cases</b> | <b>Percentage</b> |
|                                                                                                                                                                    |                                                                                                                                                                                                                                                                                                                                                                                        | 3597         | 76.7%             |
| Ingen                                                                                                                                                              |                                                                                                                                                                                                                                                                                                                                                                                        | 349          | 7.4%              |
| Islam                                                                                                                                                              |                                                                                                                                                                                                                                                                                                                                                                                        | 393          | 8.4%              |
| Kristendom                                                                                                                                                         |                                                                                                                                                                                                                                                                                                                                                                                        | 350          | 7.5%              |
| <i>Warning: these figures indicate the number of cases found in the data file. They cannot be interpreted as summary statistics of the population of interest.</i> |                                                                                                                                                                                                                                                                                                                                                                                        |              |                   |
| <b># r7pad8_profile2_7: Characteristic for profile 2: work experience. Background variable for r7pad8.</b>                                                         |                                                                                                                                                                                                                                                                                                                                                                                        |              |                   |
| <b>Information</b>                                                                                                                                                 | [Type= discrete] [Format=character] [Missing=*]                                                                                                                                                                                                                                                                                                                                        |              |                   |
| <b>Statistics [NW/ W]</b>                                                                                                                                          | [Valid=4689 /-] [Invalid=0 /-]                                                                                                                                                                                                                                                                                                                                                         |              |                   |
| <b>Interviewer's instructions</b>                                                                                                                                  | [Background variable. Stores a randomly selected profession for profile 2 in conjunction experiment R7PAD8.]                                                                                                                                                                                                                                                                           |              |                   |
| <b>Value</b>                                                                                                                                                       | <b>Label</b>                                                                                                                                                                                                                                                                                                                                                                           | <b>Cases</b> | <b>Percentage</b> |
|                                                                                                                                                                    |                                                                                                                                                                                                                                                                                                                                                                                        | 3597         | 76.7%             |
| Bonde                                                                                                                                                              |                                                                                                                                                                                                                                                                                                                                                                                        | 190          | 4.1%              |
| IT-konsulent                                                                                                                                                       |                                                                                                                                                                                                                                                                                                                                                                                        | 198          | 4.2%              |
| Ingen                                                                                                                                                              |                                                                                                                                                                                                                                                                                                                                                                                        | 173          | 3.7%              |
| Oljearbeider                                                                                                                                                       |                                                                                                                                                                                                                                                                                                                                                                                        | 175          | 3.7%              |
| Omsorgsarbeider                                                                                                                                                    |                                                                                                                                                                                                                                                                                                                                                                                        | 178          | 3.8%              |
| Selvstendig næringsdrivende                                                                                                                                        |                                                                                                                                                                                                                                                                                                                                                                                        | 178          | 3.8%              |
| <i>Warning: these figures indicate the number of cases found in the data file. They cannot be interpreted as summary statistics of the population of interest.</i> |                                                                                                                                                                                                                                                                                                                                                                                        |              |                   |
| <b># r7ran34: [Randomizes if u=3. ]</b>                                                                                                                            |                                                                                                                                                                                                                                                                                                                                                                                        |              |                   |
| <b>Information</b>                                                                                                                                                 | [Type= discrete] [Format=numeric] [Range= 1-2] [Missing=*]                                                                                                                                                                                                                                                                                                                             |              |                   |
| <b>Statistics [NW/ W]</b>                                                                                                                                          | [Valid=1092 /-] [Invalid=3597 /-]                                                                                                                                                                                                                                                                                                                                                      |              |                   |
| <b>Interviewer's instructions</b>                                                                                                                                  | [Randomizes if u=3. ]                                                                                                                                                                                                                                                                                                                                                                  |              |                   |
| <b>Value</b>                                                                                                                                                       | <b>Label</b>                                                                                                                                                                                                                                                                                                                                                                           | <b>Cases</b> | <b>Percentage</b> |
| 1                                                                                                                                                                  | 1                                                                                                                                                                                                                                                                                                                                                                                      | 559          | 51.2%             |
| 2                                                                                                                                                                  | 2                                                                                                                                                                                                                                                                                                                                                                                      | 533          | 48.8%             |
| Sysmiss                                                                                                                                                            |                                                                                                                                                                                                                                                                                                                                                                                        | 3597         |                   |
| <i>Warning: these figures indicate the number of cases found in the data file. They cannot be interpreted as summary statistics of the population of interest.</i> |                                                                                                                                                                                                                                                                                                                                                                                        |              |                   |
| <b># r7pad6a: Attitudes related to background: Persons, “The government should contribute towards reducing income differences in society”</b>                      |                                                                                                                                                                                                                                                                                                                                                                                        |              |                   |
| <b>Information</b>                                                                                                                                                 | [Type= discrete] [Format=numeric] [Range= 1-2] [Missing=*]                                                                                                                                                                                                                                                                                                                             |              |                   |
| <b>Statistics [NW/ W]</b>                                                                                                                                          | [Valid=4689 /-] [Invalid=0 /-]                                                                                                                                                                                                                                                                                                                                                         |              |                   |
| <b>Pre-question</b>                                                                                                                                                | <p>People have differing political opinions, and sometimes these opinions are related to their background. Below we have made up two imagined persons of different background. We wish to know which of these you think will be mostly in agreement with the statement below.</p> <p>Please choose the person you believe would be most in agreement with the following statement:</p> |              |                   |
| <b>Literal question</b>                                                                                                                                            | “The government should contribute towards reducing income differences in society.”                                                                                                                                                                                                                                                                                                     |              |                   |

| # r7pad6a: Attitudes related to background: Persons, “The government should contribute towards reducing income differences in society”                                       |                                                                                                                                                                                                                                                                                                                                                                                            |       |            |
|------------------------------------------------------------------------------------------------------------------------------------------------------------------------------|--------------------------------------------------------------------------------------------------------------------------------------------------------------------------------------------------------------------------------------------------------------------------------------------------------------------------------------------------------------------------------------------|-------|------------|
|                                                                                                                                                                              | [Here follows a list of randomly chosen person characteristics. See background variables.]                                                                                                                                                                                                                                                                                                 |       |            |
| Interviewer's instructions                                                                                                                                                   | [Asked if u=3 and ran34=1. Conjunction experiment. Respondents are asked to choose between profiles of two persons, that randomly differs in characteristics, and determine which of the profiles that are most likely to agree with a given statement.]                                                                                                                                   |       |            |
| Notes                                                                                                                                                                        | 1 av 3 Folk har ulike politiske holdninger, og noen ganger er deres holdninger relatert til deres bakgrunn. Under har vi                                                                                                                                                                                                                                                                   |       |            |
| Value                                                                                                                                                                        | Label                                                                                                                                                                                                                                                                                                                                                                                      | Cases | Percentage |
| 1                                                                                                                                                                            | Person 1                                                                                                                                                                                                                                                                                                                                                                                   | 290   | 6.2%       |
| 2                                                                                                                                                                            | Person 2                                                                                                                                                                                                                                                                                                                                                                                   | 259   | 5.5%       |
| 97                                                                                                                                                                           | No answer                                                                                                                                                                                                                                                                                                                                                                                  | 10    | 0.2%       |
| 98                                                                                                                                                                           | Not asked                                                                                                                                                                                                                                                                                                                                                                                  | 4130  | 88.1%      |
| Warning: these figures indicate the number of cases found in the data file. They cannot be interpreted as summary statistics of the population of interest.                  |                                                                                                                                                                                                                                                                                                                                                                                            |       |            |
| # r7pad6b: Attitudes related to background: Politicians, “The government should contribute towards reducing income differences in society”                                   |                                                                                                                                                                                                                                                                                                                                                                                            |       |            |
| Information                                                                                                                                                                  | [Type= discrete] [Format=numeric] [Range= 1-2] [Missing=*]                                                                                                                                                                                                                                                                                                                                 |       |            |
| Statistics [NW/ W]                                                                                                                                                           | [Valid=4689 /-] [Invalid=0 /-]                                                                                                                                                                                                                                                                                                                                                             |       |            |
| Pre-question                                                                                                                                                                 | <p>People have differing political opinions, and sometimes these opinions are related to their background. Below we have made up two imagined politicians of different background. We wish to know which of these you think will be mostly in agreement with the statement below.</p> <p>Please choose the person you believe would be most in agreement with the following statement:</p> |       |            |
| Literal question                                                                                                                                                             | <p>“The government should contribute towards reducing income differences in society.”</p> <p>[Here follows a list of randomly chosen person characteristics. See background variables.]</p>                                                                                                                                                                                                |       |            |
| Interviewer's instructions                                                                                                                                                   | [Asked if u=3 and ran34=2. Conjunction experiment. Respondents are asked to choose between two profiles of political representatives, that randomly differs in characteristics, and determine which of the profiles that are most likely to agree with a given statement.]                                                                                                                 |       |            |
| Notes                                                                                                                                                                        | 1 av 3 Folk har ulike politiske holdninger, og noen ganger er deres holdninger relatert til deres bakgrunn. Under har vi                                                                                                                                                                                                                                                                   |       |            |
| Value                                                                                                                                                                        | Label                                                                                                                                                                                                                                                                                                                                                                                      | Cases | Percentage |
| 1                                                                                                                                                                            | Politician 1                                                                                                                                                                                                                                                                                                                                                                               | 264   | 5.6%       |
| 2                                                                                                                                                                            | Politician 2                                                                                                                                                                                                                                                                                                                                                                               | 256   | 5.5%       |
| 97                                                                                                                                                                           | No answer                                                                                                                                                                                                                                                                                                                                                                                  | 13    | 0.3%       |
| 98                                                                                                                                                                           | Not asked                                                                                                                                                                                                                                                                                                                                                                                  | 4156  | 88.6%      |
| Warning: these figures indicate the number of cases found in the data file. They cannot be interpreted as summary statistics of the population of interest.                  |                                                                                                                                                                                                                                                                                                                                                                                            |       |            |
| # r7pad7a: Attitudes related to background: Persons, “Refugees should have the same rights to social assistance as Norwegians have, even if they are not Norwegian citizens” |                                                                                                                                                                                                                                                                                                                                                                                            |       |            |
| Information                                                                                                                                                                  | [Type= discrete] [Format=numeric] [Range= 1-2] [Missing=*]                                                                                                                                                                                                                                                                                                                                 |       |            |
| Statistics [NW/ W]                                                                                                                                                           | [Valid=4689 /-] [Invalid=0 /-]                                                                                                                                                                                                                                                                                                                                                             |       |            |
| Pre-question                                                                                                                                                                 | <p>People have differing political opinions, and sometimes these opinions are related to their background. Below we have made up two imagined persons of different background. We wish to know which of these you think will be mostly in agreement with the statement below.</p> <p>Please choose the person you believe would be most in agreement with the following statement:</p>     |       |            |
| Literal question                                                                                                                                                             | <p>“Refugees should have the same rights to social assistance as Norwegians have, even if they are not Norwegian citizens.”</p> <p>[Here follows a list of randomly chosen person characteristics. See background variables.]</p>                                                                                                                                                          |       |            |
| Interviewer's instructions                                                                                                                                                   | [Asked if u=3 and ran34=1. Conjunction experiment. Respondents are asked to choose between profiles of two persons, that randomly differs in characteristics, and determine which of the profiles that are most likely to agree with a given statement.]                                                                                                                                   |       |            |
| Notes                                                                                                                                                                        | 2 av 3 Folk har ulike politiske holdninger, og noen ganger er deres holdninger relatert til deres bakgrunn. Under har vi                                                                                                                                                                                                                                                                   |       |            |

**# r7pad7a: Attitudes related to background: Persons, “Refugees should have the same rights to social assistance as Norwegians have, even if they are not Norwegian citizens”**

| Value | Label     | Cases | Percentage |
|-------|-----------|-------|------------|
| 1     | Person 1  | 285   | 6.1%       |
| 2     | Person 2  | 262   | 5.6%       |
| 97    | No answer | 12    | 0.3%       |
| 98    | Not asked | 4130  | 88.1%      |

*Warning: these figures indicate the number of cases found in the data file. They cannot be interpreted as summary statistics of the population of interest.*

**# r7pad7b: Attitudes related to background: Politicians, “Refugees should have the same rights to social assistance as Norwegians have, even if they are not Norwegian citizens”**

|                                   |                                                                                                                                                                                                                                                                                                                                                                                            |
|-----------------------------------|--------------------------------------------------------------------------------------------------------------------------------------------------------------------------------------------------------------------------------------------------------------------------------------------------------------------------------------------------------------------------------------------|
| <b>Information</b>                | [Type= discrete] [Format=numeric] [Range= 1-2] [Missing=*]                                                                                                                                                                                                                                                                                                                                 |
| <b>Statistics [NW/ W]</b>         | [Valid=4689 /-] [Invalid=0 /-]                                                                                                                                                                                                                                                                                                                                                             |
| <b>Pre-question</b>               | <p>People have differing political opinions, and sometimes these opinions are related to their background. Below we have made up two imagined politicians of different background. We wish to know which of these you think will be mostly in agreement with the statement below.</p> <p>Please choose the person you believe would be most in agreement with the following statement:</p> |
| <b>Literal question</b>           | <p>“Refugees should have the same rights to social assistance as Norwegians have, even if they are not Norwegian citizens.”</p> <p>[Here follows a list of randomly chosen person characteristics. See background variables.]</p>                                                                                                                                                          |
| <b>Interviewer's instructions</b> | [Asked if u=3 and ran34=2. Conjunction experiment. Respondents are asked to choose between two profiles of political representatives, that randomly differs in characteristics, and determine which of the profiles that are most likely to agree with a given statement.]                                                                                                                 |
| <b>Notes</b>                      | 2 av 3 Folk har ulike politiske holdninger, og noen ganger er deres holdninger relatert til deres bakgrunn. Under har vi                                                                                                                                                                                                                                                                   |

| Value | Label        | Cases | Percentage |
|-------|--------------|-------|------------|
| 1     | Politician 1 | 247   | 5.3%       |
| 2     | Politician 2 | 268   | 5.7%       |
| 97    | No answer    | 18    | 0.4%       |
| 98    | Not asked    | 4156  | 88.6%      |

*Warning: these figures indicate the number of cases found in the data file. They cannot be interpreted as summary statistics of the population of interest.*

**# r7pad8a: Attitudes related to background: Persons, “Most of the reductions in emissions of greenhouse gases that Norway has committed to, should be carried out abroad”**

|                                   |                                                                                                                                                                                                                                                                                                                                                                                        |
|-----------------------------------|----------------------------------------------------------------------------------------------------------------------------------------------------------------------------------------------------------------------------------------------------------------------------------------------------------------------------------------------------------------------------------------|
| <b>Information</b>                | [Type= discrete] [Format=numeric] [Range= 1-2] [Missing=*]                                                                                                                                                                                                                                                                                                                             |
| <b>Statistics [NW/ W]</b>         | [Valid=4689 /-] [Invalid=0 /-]                                                                                                                                                                                                                                                                                                                                                         |
| <b>Pre-question</b>               | <p>People have differing political opinions, and sometimes these opinions are related to their background. Below we have made up two imagined persons of different background. We wish to know which of these you think will be mostly in agreement with the statement below.</p> <p>Please choose the person you believe would be most in agreement with the following statement:</p> |
| <b>Literal question</b>           | <p>“Most of the reductions in emissions of greenhouse gases that Norway has committed to, should be carried out abroad.”</p> <p>[Here follows a list of randomly chosen person characteristics. See background variables.]</p>                                                                                                                                                         |
| <b>Interviewer's instructions</b> | [Asked if u=3 and ran34=1. Conjunction experiment. Respondents are asked to choose between profiles of two persons, that randomly differs in characteristics, and determine which of the profiles that are most likely to agree with a given statement.]                                                                                                                               |
| <b>Notes</b>                      | 3 av 3 Folk har ulike politiske holdninger, og noen ganger er deres holdninger relatert til deres bakgrunn. Under har vi                                                                                                                                                                                                                                                               |

| Value | Label     | Cases | Percentage |
|-------|-----------|-------|------------|
| 1     | Person 1  | 259   | 5.5%       |
| 2     | Person 2  | 283   | 6.0%       |
| 97    | No answer | 17    | 0.4%       |

**# r7pad8a: Attitudes related to background: Persons, “Most of the reductions in emissions of greenhouse gases that Norway has committed to, should be carried out abroad”**

| Value | Label     | Cases | Percentage                                                                                |
|-------|-----------|-------|-------------------------------------------------------------------------------------------|
| 98    | Not asked | 4130  | 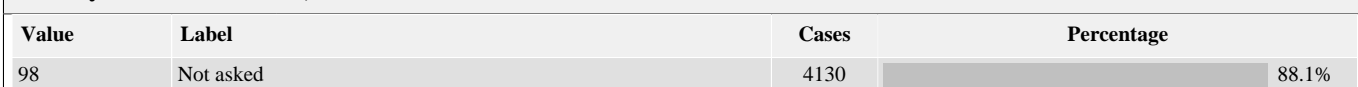 88.1% |

*Warning: these figures indicate the number of cases found in the data file. They cannot be interpreted as summary statistics of the population of interest.*

**# r7pad8b: Attitudes related to background: Politicians, “Most of the reductions in emissions of greenhouse gases that Norway has committed to, should be carried out abroad”**

|                                   |                                                                                                                                                                                                                                                                                                                                                                                            |
|-----------------------------------|--------------------------------------------------------------------------------------------------------------------------------------------------------------------------------------------------------------------------------------------------------------------------------------------------------------------------------------------------------------------------------------------|
| <b>Information</b>                | [Type= discrete] [Format=numeric] [Range= 1-2] [Missing=*]                                                                                                                                                                                                                                                                                                                                 |
| <b>Statistics [NW/ W]</b>         | [Valid=4689 /-] [Invalid=0 /-]                                                                                                                                                                                                                                                                                                                                                             |
| <b>Pre-question</b>               | <p>People have differing political opinions, and sometimes these opinions are related to their background. Below we have made up two imagined politicians of different background. We wish to know which of these you think will be mostly in agreement with the statement below.</p> <p>Please choose the person you believe would be most in agreement with the following statement:</p> |
| <b>Literal question</b>           | <p>“Most of the reductions in emissions of greenhouse gases that Norway has committed to, should be carried out abroad.”</p> <p>[Here follows a list of randomly chosen person characteristics. See background variables.]</p>                                                                                                                                                             |
| <b>Interviewer's instructions</b> | [Asked if u=3 and ran34=2. Conjunction experiment. Respondents are asked to choose between two profiles of political representatives, that randomly differs in characteristics, and determine which of the profiles that are most likely to agree with a given statement.]                                                                                                                 |
| <b>Notes</b>                      | 3 av 3 Folk har ulike politiske holdninger, og noen ganger er deres holdninger relatert til deres bakgrunn. Under har vi                                                                                                                                                                                                                                                                   |

| Value | Label        | Cases | Percentage                                                                                  |
|-------|--------------|-------|---------------------------------------------------------------------------------------------|
| 1     | Politician 1 | 259   | 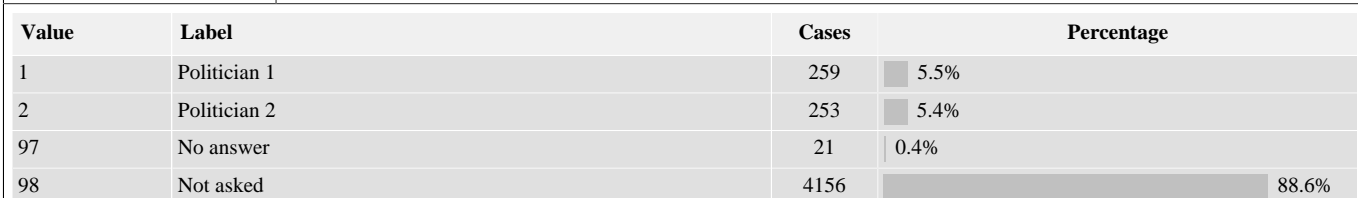 5.5%    |
| 2     | Politician 2 | 253   |  5.4%    |
| 97    | No answer    | 21    |  0.4%  |
| 98    | Not asked    | 4156  |  88.6% |

*Warning: these figures indicate the number of cases found in the data file. They cannot be interpreted as summary statistics of the population of interest.*

**# r7fri1\_1: Volunteering: Art and culture, band and choir**

|                                   |                                                                                                                                                                                                                                     |
|-----------------------------------|-------------------------------------------------------------------------------------------------------------------------------------------------------------------------------------------------------------------------------------|
| <b>Information</b>                | [Type= discrete] [Format=numeric] [Range= 1-1] [Missing=*]                                                                                                                                                                          |
| <b>Statistics [NW/ W]</b>         | [Valid=4689 /-] [Invalid=0 /-]                                                                                                                                                                                                      |
| <b>Pre-question</b>               | During the last 12 months have you carried out voluntary, unpaid work for voluntary organisations in any of the following areas:                                                                                                    |
| <b>Literal question</b>           | Art and culture, band and choir [Music, theatre and dance. Art, applied arts and architecture. History, literature and language. Museums, collections and libraries. Periodicals and media. Other cultural and artistic activities] |
| <b>Interviewer's instructions</b> | [Asked if u=1. ]                                                                                                                                                                                                                    |
| <b>Notes</b>                      | Kunst og kultur, korps og kor[Musikk, teater og dans. Kunst, brukskunst og arkitektur. Historie, litteratur og språk. Mu                                                                                                            |

| Value | Label                           | Cases | Percentage                                                                                  |
|-------|---------------------------------|-------|---------------------------------------------------------------------------------------------|
| 0     |                                 | 971   | 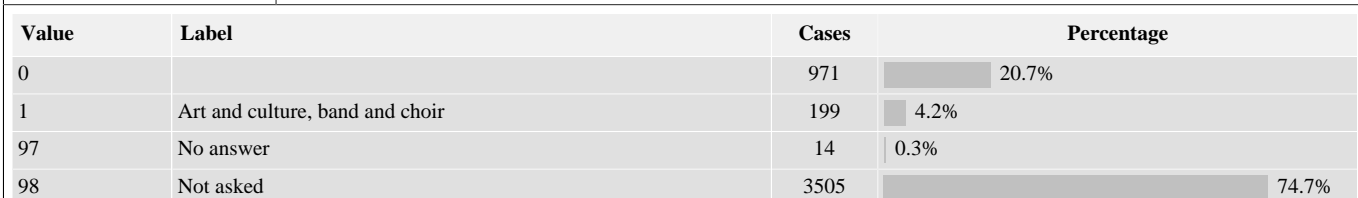 20.7% |
| 1     | Art and culture, band and choir | 199   |  4.2%  |
| 97    | No answer                       | 14    |  0.3%  |
| 98    | Not asked                       | 3505  |  74.7% |

*Warning: these figures indicate the number of cases found in the data file. They cannot be interpreted as summary statistics of the population of interest.*

**# r7fri1\_2: Volunteering: Athletics and sport**

|                           |                                                                                                                                  |
|---------------------------|----------------------------------------------------------------------------------------------------------------------------------|
| <b>Information</b>        | [Type= discrete] [Format=numeric] [Range= 1-1] [Missing=*]                                                                       |
| <b>Statistics [NW/ W]</b> | [Valid=4689 /-] [Invalid=0 /-]                                                                                                   |
| <b>Pre-question</b>       | During the last 12 months have you carried out voluntary, unpaid work for voluntary organisations in any of the following areas: |
| <b>Literal question</b>   | Athletics and sport [All types of athletics, sports and exercise, rifle club, company sports and disabled sports]                |



| # r7fri1_2: Volunteering: Athletics and sport                                                                                                                      |                                       |                                                                                                                                                                                                                                                                                                                                                     |                              |
|--------------------------------------------------------------------------------------------------------------------------------------------------------------------|---------------------------------------|-----------------------------------------------------------------------------------------------------------------------------------------------------------------------------------------------------------------------------------------------------------------------------------------------------------------------------------------------------|------------------------------|
| <b>Interviewer's instructions</b>                                                                                                                                  |                                       | [Asked if u=1. ]                                                                                                                                                                                                                                                                                                                                    |                              |
| <b>Notes</b>                                                                                                                                                       |                                       | Idrett og sport[Alle typer idrett, sport og trim, skytterlag, bedriftsidrett og idrett for funksjonshemmede] (Har du i l                                                                                                                                                                                                                            |                              |
| Value                                                                                                                                                              | Label                                 | Cases                                                                                                                                                                                                                                                                                                                                               | Percentage                   |
| 0                                                                                                                                                                  |                                       | 887                                                                                                                                                                                                                                                                                                                                                 | <div><div></div></div> 18.9% |
| 1                                                                                                                                                                  | Athletics and sport                   | 283                                                                                                                                                                                                                                                                                                                                                 | <div><div></div></div> 6.0%  |
| 97                                                                                                                                                                 | No answer                             | 14                                                                                                                                                                                                                                                                                                                                                  | <div><div></div></div> 0.3%  |
| 98                                                                                                                                                                 | Not asked                             | 3505                                                                                                                                                                                                                                                                                                                                                | <div><div></div></div> 74.7% |
| <i>Warning: these figures indicate the number of cases found in the data file. They cannot be interpreted as summary statistics of the population of interest.</i> |                                       |                                                                                                                                                                                                                                                                                                                                                     |                              |
| # r7fri1_3: Volunteering: Hobbies, recreation, outdoor activity                                                                                                    |                                       |                                                                                                                                                                                                                                                                                                                                                     |                              |
| <b>Information</b>                                                                                                                                                 |                                       | [Type= discrete] [Format=numeric] [Range= 1-1] [Missing=*]                                                                                                                                                                                                                                                                                          |                              |
| <b>Statistics [NW/ W]</b>                                                                                                                                          |                                       | [Valid=4689 /-] [Invalid=0 /-]                                                                                                                                                                                                                                                                                                                      |                              |
| <b>Pre-question</b>                                                                                                                                                |                                       | During the last 12 months have you carried out voluntary, unpaid work for voluntary organisations in any of the following areas:                                                                                                                                                                                                                    |                              |
| <b>Literal question</b>                                                                                                                                            |                                       | Hobbies, recreation, outdoor activity [Outdoor recreation and scouts. Car and boat clubs. Animal owner clubs. Pensioners' clubs. Student societies. Social clubs - Rotary, Lions etc. Other hobbies and recreational activities]                                                                                                                    |                              |
| <b>Interviewer's instructions</b>                                                                                                                                  |                                       | [Asked if u=1. ]                                                                                                                                                                                                                                                                                                                                    |                              |
| <b>Notes</b>                                                                                                                                                       |                                       | Hobby, fritid, utendørsaktivitet[Friluftsliv og speideren. Motor og båtforening. Dyreeierklubber. Pensjonistlag. Studen                                                                                                                                                                                                                             |                              |
| Value                                                                                                                                                              | Label                                 | Cases                                                                                                                                                                                                                                                                                                                                               | Percentage                   |
| 0                                                                                                                                                                  |                                       | 951                                                                                                                                                                                                                                                                                                                                                 | <div><div></div></div> 20.3% |
| 1                                                                                                                                                                  | Hobbies, recreation, outdoor activity | 219                                                                                                                                                                                                                                                                                                                                                 | <div><div></div></div> 4.7%  |
| 97                                                                                                                                                                 | No answer                             | 14                                                                                                                                                                                                                                                                                                                                                  | <div><div></div></div> 0.3%  |
| 98                                                                                                                                                                 | Not asked                             | 3505                                                                                                                                                                                                                                                                                                                                                | <div><div></div></div> 74.7% |
| <i>Warning: these figures indicate the number of cases found in the data file. They cannot be interpreted as summary statistics of the population of interest.</i> |                                       |                                                                                                                                                                                                                                                                                                                                                     |                              |
| # r7fri1_4: Volunteering: Education, training and research                                                                                                         |                                       |                                                                                                                                                                                                                                                                                                                                                     |                              |
| <b>Information</b>                                                                                                                                                 |                                       | [Type= discrete] [Format=numeric] [Range= 1-1] [Missing=*]                                                                                                                                                                                                                                                                                          |                              |
| <b>Statistics [NW/ W]</b>                                                                                                                                          |                                       | [Valid=4689 /-] [Invalid=0 /-]                                                                                                                                                                                                                                                                                                                      |                              |
| <b>Pre-question</b>                                                                                                                                                |                                       | During the last 12 months have you carried out voluntary, unpaid work for voluntary organisations in any of the following areas:                                                                                                                                                                                                                    |                              |
| <b>Literal question</b>                                                                                                                                            |                                       | Education, training and research [Primary and lower secondary schools including the parent council in state schools, but voluntary work only in private schools. Upper secondary schools. Folk high schools. Universities and university colleges. Vocational/technical education. Adult education and further education. Research and development] |                              |
| <b>Interviewer's instructions</b>                                                                                                                                  |                                       | [Asked if u=1. ]                                                                                                                                                                                                                                                                                                                                    |                              |
| <b>Notes</b>                                                                                                                                                       |                                       | Utdanning, opplæring og forskning[Barne- og ungdomsskoler inkludert FAU i offentlige skoler, men dugnader bare i private                                                                                                                                                                                                                            |                              |
| Value                                                                                                                                                              | Label                                 | Cases                                                                                                                                                                                                                                                                                                                                               | Percentage                   |
| 0                                                                                                                                                                  |                                       | 1051                                                                                                                                                                                                                                                                                                                                                | <div><div></div></div> 22.4% |
| 1                                                                                                                                                                  | Education, training and research      | 119                                                                                                                                                                                                                                                                                                                                                 | <div><div></div></div> 2.5%  |
| 97                                                                                                                                                                 | No answer                             | 14                                                                                                                                                                                                                                                                                                                                                  | <div><div></div></div> 0.3%  |
| 98                                                                                                                                                                 | Not asked                             | 3505                                                                                                                                                                                                                                                                                                                                                | <div><div></div></div> 74.7% |
| <i>Warning: these figures indicate the number of cases found in the data file. They cannot be interpreted as summary statistics of the population of interest.</i> |                                       |                                                                                                                                                                                                                                                                                                                                                     |                              |
| # r7fri1_5: Volunteering: Health, nursing and rescue work                                                                                                          |                                       |                                                                                                                                                                                                                                                                                                                                                     |                              |
| <b>Information</b>                                                                                                                                                 |                                       | [Type= discrete] [Format=numeric] [Range= 1-1] [Missing=*]                                                                                                                                                                                                                                                                                          |                              |
| <b>Statistics [NW/ W]</b>                                                                                                                                          |                                       | [Valid=4689 /-] [Invalid=0 /-]                                                                                                                                                                                                                                                                                                                      |                              |
| <b>Pre-question</b>                                                                                                                                                |                                       | During the last 12 months have you carried out voluntary, unpaid work for voluntary organisations in any of the following areas:                                                                                                                                                                                                                    |                              |

| # r7fri1_5: Volunteering: Health, nursing and rescue work                                                                                                   |                                                                                                                                                                                                                                                                       |       |                              |
|-------------------------------------------------------------------------------------------------------------------------------------------------------------|-----------------------------------------------------------------------------------------------------------------------------------------------------------------------------------------------------------------------------------------------------------------------|-------|------------------------------|
| Literal question                                                                                                                                            | Health, nursing and rescue work [Hospital. Rehabilitation. Nursing home. Sheltered housing and home care services. Psychiatric institutions. Out-patient health services. Alternative medicine. Rescue work and ambulance services]                                   |       |                              |
| Interviewer's instructions                                                                                                                                  | [Asked if u=1. ]                                                                                                                                                                                                                                                      |       |                              |
| Notes                                                                                                                                                       | Helse, pleie og redningsarbeid[Sykehus. Rehabilitering. Sykehjem. Omsorgsbolig og hjemmetjenestene. Psykiatriske institus                                                                                                                                             |       |                              |
| Value                                                                                                                                                       | Label                                                                                                                                                                                                                                                                 | Cases | Percentage                   |
| 0                                                                                                                                                           |                                                                                                                                                                                                                                                                       | 1105  | <div><div></div></div> 23.6% |
| 1                                                                                                                                                           | Health, nursing and rescue work                                                                                                                                                                                                                                       | 65    | <div><div></div></div> 1.4%  |
| 97                                                                                                                                                          | No answer                                                                                                                                                                                                                                                             | 14    | <div><div></div></div> 0.3%  |
| 98                                                                                                                                                          | Not asked                                                                                                                                                                                                                                                             | 3505  | <div><div></div></div> 74.7% |
| Warning: these figures indicate the number of cases found in the data file. They cannot be interpreted as summary statistics of the population of interest. |                                                                                                                                                                                                                                                                       |       |                              |
| # r7fri1_6: Volunteering: Social services and substance abuse care                                                                                          |                                                                                                                                                                                                                                                                       |       |                              |
| Information                                                                                                                                                 | [Type= discrete] [Format=numeric] [Range= 1-1] [Missing=*]                                                                                                                                                                                                            |       |                              |
| Statistics [NW/ W]                                                                                                                                          | [Valid=4689 /-] [Invalid=0 /-]                                                                                                                                                                                                                                        |       |                              |
| Pre-question                                                                                                                                                | During the last 12 months have you carried out voluntary, unpaid work for voluntary organisations in any of the following areas:                                                                                                                                      |       |                              |
| Literal question                                                                                                                                            | Social services and substance abuse care [Kindergartens. The Norwegian Red Cross. Blue Cross Norway. Norwegian People's Aid. Family counselling. Crisis centres and telephones. Services for the disabled. Services for the elderly. Self-help and volunteer centres] |       |                              |
| Interviewer's instructions                                                                                                                                  | [Asked if u=1. ]                                                                                                                                                                                                                                                      |       |                              |
| Notes                                                                                                                                                       | Sosiale tjenester og rusmiddelomsorg[Barnehager. Røde kors. Blå kors. Norsk folkehjelp. Familierådgiving. Krisesentre                                                                                                                                                 |       |                              |
| Value                                                                                                                                                       | Label                                                                                                                                                                                                                                                                 | Cases | Percentage                   |
| 0                                                                                                                                                           |                                                                                                                                                                                                                                                                       | 1091  | <div><div></div></div> 23.3% |
| 1                                                                                                                                                           | Social services and substance abuse care                                                                                                                                                                                                                              | 79    | <div><div></div></div> 1.7%  |
| 97                                                                                                                                                          | No answer                                                                                                                                                                                                                                                             | 14    | <div><div></div></div> 0.3%  |
| 98                                                                                                                                                          | Not asked                                                                                                                                                                                                                                                             | 3505  | <div><div></div></div> 74.7% |
| Warning: these figures indicate the number of cases found in the data file. They cannot be interpreted as summary statistics of the population of interest. |                                                                                                                                                                                                                                                                       |       |                              |
| # r7fri1_7: Volunteering: Nature, environmental and animal protection                                                                                       |                                                                                                                                                                                                                                                                       |       |                              |
| Information                                                                                                                                                 | [Type= discrete] [Format=numeric] [Range= 1-1] [Missing=*]                                                                                                                                                                                                            |       |                              |
| Statistics [NW/ W]                                                                                                                                          | [Valid=4689 /-] [Invalid=0 /-]                                                                                                                                                                                                                                        |       |                              |
| Pre-question                                                                                                                                                | During the last 12 months have you carried out voluntary, unpaid work for voluntary organisations in any of the following areas:                                                                                                                                      |       |                              |
| Literal question                                                                                                                                            | Nature, environmental and animal protection [Nature and environmental protection. Area preservation and area management. Animal protection. Veterinary services]                                                                                                      |       |                              |
| Interviewer's instructions                                                                                                                                  | [Asked if u=1. ]                                                                                                                                                                                                                                                      |       |                              |
| Notes                                                                                                                                                       | Natur-, miljø- og dyrevern[Natur- og miljøvern. Områdevern og områdeforvaltning. Dyrevern. Veterinærtjenester] (Har                                                                                                                                                   |       |                              |
| Value                                                                                                                                                       | Label                                                                                                                                                                                                                                                                 | Cases | Percentage                   |
| 0                                                                                                                                                           |                                                                                                                                                                                                                                                                       | 1139  | <div><div></div></div> 24.3% |
| 1                                                                                                                                                           | Nature, environmental and animal protection                                                                                                                                                                                                                           | 31    | <div><div></div></div> 0.7%  |
| 97                                                                                                                                                          | No answer                                                                                                                                                                                                                                                             | 14    | <div><div></div></div> 0.3%  |
| 98                                                                                                                                                          | Not asked                                                                                                                                                                                                                                                             | 3505  | <div><div></div></div> 74.7% |
| Warning: these figures indicate the number of cases found in the data file. They cannot be interpreted as summary statistics of the population of interest. |                                                                                                                                                                                                                                                                       |       |                              |
| # r7fri1_8: Volunteering: Residents' associations, community associations and local neighbourhood                                                           |                                                                                                                                                                                                                                                                       |       |                              |
| Information                                                                                                                                                 | [Type= discrete] [Format=numeric] [Range= 1-1] [Missing=*]                                                                                                                                                                                                            |       |                              |
| Statistics [NW/ W]                                                                                                                                          | [Valid=4689 /-] [Invalid=0 /-]                                                                                                                                                                                                                                        |       |                              |

| # r7fri1_8: Volunteering: Residents' associations, community associations and local neighbourhood                                                           |                                                                                                                                                                               |       |                   |
|-------------------------------------------------------------------------------------------------------------------------------------------------------------|-------------------------------------------------------------------------------------------------------------------------------------------------------------------------------|-------|-------------------|
| Pre-question                                                                                                                                                | During the last 12 months have you carried out voluntary, unpaid work for voluntary organisations in any of the following areas:                                              |       |                   |
| Literal question                                                                                                                                            | Residents' associations, community associations and local neighbourhood [Meeting house]                                                                                       |       |                   |
| Interviewer's instructions                                                                                                                                  | [Asked if u=1. ]                                                                                                                                                              |       |                   |
| Notes                                                                                                                                                       | Velforeninger, grendelag og nærmiljø[Forsamlingshus] (Har du i løpet av de siste 12 måneder utført frivillig, ulønns                                                          |       |                   |
| Value                                                                                                                                                       | Label                                                                                                                                                                         | Cases | Percentage        |
| 0                                                                                                                                                           |                                                                                                                                                                               | 1027  | <div></div> 21.9% |
| 1                                                                                                                                                           | Residents' associations, community associations and local neighbourhood                                                                                                       | 143   | <div></div> 3.0%  |
| 97                                                                                                                                                          | No answer                                                                                                                                                                     | 14    | <div></div> 0.3%  |
| 98                                                                                                                                                          | Not asked                                                                                                                                                                     | 3505  | <div></div> 74.7% |
| Warning: these figures indicate the number of cases found in the data file. They cannot be interpreted as summary statistics of the population of interest. |                                                                                                                                                                               |       |                   |
| # r7fri1_9: Volunteering: Housing co-operatives and housing associations                                                                                    |                                                                                                                                                                               |       |                   |
| Information                                                                                                                                                 | [Type= discrete] [Format=numeric] [Range= 1-1] [Missing=*]                                                                                                                    |       |                   |
| Statistics [NW/ W]                                                                                                                                          | [Valid=4689 /-] [Invalid=0 /-]                                                                                                                                                |       |                   |
| Pre-question                                                                                                                                                | During the last 12 months have you carried out voluntary, unpaid work for voluntary organisations in any of the following areas:                                              |       |                   |
| Literal question                                                                                                                                            | Housing co-operatives and housing associations [Homeowner associations]                                                                                                       |       |                   |
| Interviewer's instructions                                                                                                                                  | [Asked if u=1. ]                                                                                                                                                              |       |                   |
| Notes                                                                                                                                                       | Borettslag og boligbyggelag[Huseierforening] (Har du i løpet av de siste 12 måneder utført frivillig, ulønnet arbeids                                                         |       |                   |
| Value                                                                                                                                                       | Label                                                                                                                                                                         | Cases | Percentage        |
| 0                                                                                                                                                           |                                                                                                                                                                               | 1034  | <div></div> 22.1% |
| 1                                                                                                                                                           | Housing co-operatives and housing associations                                                                                                                                | 136   | <div></div> 2.9%  |
| 97                                                                                                                                                          | No answer                                                                                                                                                                     | 14    | <div></div> 0.3%  |
| 98                                                                                                                                                          | Not asked                                                                                                                                                                     | 3505  | <div></div> 74.7% |
| Warning: these figures indicate the number of cases found in the data file. They cannot be interpreted as summary statistics of the population of interest. |                                                                                                                                                                               |       |                   |
| # r7fri1_10: Volunteering: Rights, support and advocacy work                                                                                                |                                                                                                                                                                               |       |                   |
| Information                                                                                                                                                 | [Type= discrete] [Format=numeric] [Range= 1-1] [Missing=*]                                                                                                                    |       |                   |
| Statistics [NW/ W]                                                                                                                                          | [Valid=4689 /-] [Invalid=0 /-]                                                                                                                                                |       |                   |
| Pre-question                                                                                                                                                | During the last 12 months have you carried out voluntary, unpaid work for voluntary organisations in any of the following areas:                                              |       |                   |
| Literal question                                                                                                                                            | Rights, support and advocacy work [Disabled and ill. Women's rights. Language societies. Ethnic minorities. Weak/exposed groups, prisoners, the poor. Campaigns and lobbying] |       |                   |
| Interviewer's instructions                                                                                                                                  | [Asked if u=1. ]                                                                                                                                                              |       |                   |
| Notes                                                                                                                                                       | Rettighets-, støtte- og påvirkningsarbeid[Funksjonshemmede og syke. Kvinnesak. Mållag, Etniske minoriteter, Svake/utsa                                                        |       |                   |
| Value                                                                                                                                                       | Label                                                                                                                                                                         | Cases | Percentage        |
| 0                                                                                                                                                           |                                                                                                                                                                               | 1146  | <div></div> 24.4% |
| 1                                                                                                                                                           | Rights, support and advocacy work                                                                                                                                             | 24    | <div></div> 0.5%  |
| 97                                                                                                                                                          | No answer                                                                                                                                                                     | 14    | <div></div> 0.3%  |
| 98                                                                                                                                                          | Not asked                                                                                                                                                                     | 3505  | <div></div> 74.7% |
| Warning: these figures indicate the number of cases found in the data file. They cannot be interpreted as summary statistics of the population of interest. |                                                                                                                                                                               |       |                   |
| # r7fri1_11: Volunteering: Political parties                                                                                                                |                                                                                                                                                                               |       |                   |
| Information                                                                                                                                                 | [Type= discrete] [Format=numeric] [Range= 1-1] [Missing=*]                                                                                                                    |       |                   |
| Statistics [NW/ W]                                                                                                                                          | [Valid=4689 /-] [Invalid=0 /-]                                                                                                                                                |       |                   |

| # r7fri1_11: Volunteering: Political parties                                                                                                                |                                                                                                                                                                                                           |       |                   |
|-------------------------------------------------------------------------------------------------------------------------------------------------------------|-----------------------------------------------------------------------------------------------------------------------------------------------------------------------------------------------------------|-------|-------------------|
| Pre-question                                                                                                                                                | During the last 12 months have you carried out voluntary, unpaid work for voluntary organisations in any of the following areas:                                                                          |       |                   |
| Literal question                                                                                                                                            | Political parties [Youth political parties]                                                                                                                                                               |       |                   |
| Interviewer's instructions                                                                                                                                  | [Asked if u=1. ]                                                                                                                                                                                          |       |                   |
| Notes                                                                                                                                                       | Politiske partier[Ungdomspartier] (Har du i løpet av de siste 12 måneder utført frivillig, ulønnet arbeidsinnsats for                                                                                     |       |                   |
| Value                                                                                                                                                       | Label                                                                                                                                                                                                     | Cases | Percentage        |
| 0                                                                                                                                                           |                                                                                                                                                                                                           | 1152  | <div></div> 24.6% |
| 1                                                                                                                                                           | Political parties                                                                                                                                                                                         | 18    | <div></div> 0.4%  |
| 97                                                                                                                                                          | No answer                                                                                                                                                                                                 | 14    | <div></div> 0.3%  |
| 98                                                                                                                                                          | Not asked                                                                                                                                                                                                 | 3505  | <div></div> 74.7% |
| Warning: these figures indicate the number of cases found in the data file. They cannot be interpreted as summary statistics of the population of interest. |                                                                                                                                                                                                           |       |                   |
| # r7fri1_12: Volunteering: International exchange, emergency help, assistance and human rights work                                                         |                                                                                                                                                                                                           |       |                   |
| Information                                                                                                                                                 | [Type= discrete] [Format=numeric] [Range= 1-1] [Missing=*]                                                                                                                                                |       |                   |
| Statistics [NW/ W]                                                                                                                                          | [Valid=4689 /-] [Invalid=0 /-]                                                                                                                                                                            |       |                   |
| Pre-question                                                                                                                                                | During the last 12 months have you carried out voluntary, unpaid work for voluntary organisations in any of the following areas:                                                                          |       |                   |
| Literal question                                                                                                                                            | International exchange, emergency help, assistance and human rights work [International friendship and exchange programmes. International relief and development assistance. Human rights and peace work] |       |                   |
| Interviewer's instructions                                                                                                                                  | [Asked if u=1. ]                                                                                                                                                                                          |       |                   |
| Notes                                                                                                                                                       | Internasjonal utveksling, nødhjelp, bistand og menneskerettighetsarbeid[Internasjonale vennskaps- og utvekslingsprogramm                                                                                  |       |                   |
| Value                                                                                                                                                       | Label                                                                                                                                                                                                     | Cases | Percentage        |
| 0                                                                                                                                                           |                                                                                                                                                                                                           | 1125  | <div></div> 24.0% |
| 1                                                                                                                                                           | International exchange, emergency help, assistance and human rights work                                                                                                                                  | 45    | <div></div> 1.0%  |
| 97                                                                                                                                                          | No answer                                                                                                                                                                                                 | 14    | <div></div> 0.3%  |
| 98                                                                                                                                                          | Not asked                                                                                                                                                                                                 | 3505  | <div></div> 74.7% |
| Warning: these figures indicate the number of cases found in the data file. They cannot be interpreted as summary statistics of the population of interest. |                                                                                                                                                                                                           |       |                   |
| # r7fri1_13: Volunteering: Vocational, industry and trade unions and associations                                                                           |                                                                                                                                                                                                           |       |                   |
| Information                                                                                                                                                 | [Type= discrete] [Format=numeric] [Range= 1-1] [Missing=*]                                                                                                                                                |       |                   |
| Statistics [NW/ W]                                                                                                                                          | [Valid=4689 /-] [Invalid=0 /-]                                                                                                                                                                            |       |                   |
| Pre-question                                                                                                                                                | During the last 12 months have you carried out voluntary, unpaid work for voluntary organisations in any of the following areas:                                                                          |       |                   |
| Literal question                                                                                                                                            | Vocational, industry and trade unions and associations [Employee organisations. Employer organisations. Trade and industry associations. Producers co-operatives. Pupil and student organisations.]       |       |                   |
| Interviewer's instructions                                                                                                                                  | [Asked if u=1. ]                                                                                                                                                                                          |       |                   |
| Notes                                                                                                                                                       | Yrkes-, bransje- og fagforeninger[Arbeidstakerorganisasjoner. Arbeidsgiverorganisasjoner. Bransje- og næringssammenslutn                                                                                  |       |                   |
| Value                                                                                                                                                       | Label                                                                                                                                                                                                     | Cases | Percentage        |
| 0                                                                                                                                                           |                                                                                                                                                                                                           | 1099  | <div></div> 23.4% |
| 1                                                                                                                                                           | Vocational, industry and trade unions and associations                                                                                                                                                    | 71    | <div></div> 1.5%  |
| 97                                                                                                                                                          | No answer                                                                                                                                                                                                 | 14    | <div></div> 0.3%  |
| 98                                                                                                                                                          | Not asked                                                                                                                                                                                                 | 3505  | <div></div> 74.7% |
| Warning: these figures indicate the number of cases found in the data file. They cannot be interpreted as summary statistics of the population of interest. |                                                                                                                                                                                                           |       |                   |
| # r7fri1_14: Volunteering: Religion and beliefs including the Church of Norway                                                                              |                                                                                                                                                                                                           |       |                   |
| Information                                                                                                                                                 | [Type= discrete] [Format=numeric] [Range= 1-1] [Missing=*]                                                                                                                                                |       |                   |

| # r7fri1_14: Volunteering: Religion and beliefs including the Church of Norway                                                                              |                                                                                                                                                                                                                                           |       |                   |
|-------------------------------------------------------------------------------------------------------------------------------------------------------------|-------------------------------------------------------------------------------------------------------------------------------------------------------------------------------------------------------------------------------------------|-------|-------------------|
| Statistics [NW/ W]                                                                                                                                          | [Valid=4689 /-] [Invalid=0 /-]                                                                                                                                                                                                            |       |                   |
| Pre-question                                                                                                                                                | During the last 12 months have you carried out voluntary, unpaid work for voluntary organisations in any of the following areas:                                                                                                          |       |                   |
| Literal question                                                                                                                                            | Religion and beliefs including the Church of Norway [Organisations linked to the Church of Norway. Mission. Protestant free church. Other religions. Belief organisations, also non-religious such as the Norwegian Humanist Association] |       |                   |
| Interviewer's instructions                                                                                                                                  | [Asked if u=1. ]                                                                                                                                                                                                                          |       |                   |
| Notes                                                                                                                                                       | Religion og livssyn inkludert den norske kirke[Organisasjoner tilknyttet den norske kirke. Misjon. Protestantisk frikirke]                                                                                                                |       |                   |
| Value                                                                                                                                                       | Label                                                                                                                                                                                                                                     | Cases | Percentage        |
| 0                                                                                                                                                           |                                                                                                                                                                                                                                           | 1089  | <div></div> 23.2% |
| 1                                                                                                                                                           | Religion and beliefs including the Church of Norway                                                                                                                                                                                       | 81    | <div></div> 1.7%  |
| 97                                                                                                                                                          | No answer                                                                                                                                                                                                                                 | 14    | <div></div> 0.3%  |
| 98                                                                                                                                                          | Not asked                                                                                                                                                                                                                                 | 3505  | <div></div> 74.7% |
| Warning: these figures indicate the number of cases found in the data file. They cannot be interpreted as summary statistics of the population of interest. |                                                                                                                                                                                                                                           |       |                   |
| # r7fri1_15: Volunteering: Immigrant organisations                                                                                                          |                                                                                                                                                                                                                                           |       |                   |
| Information                                                                                                                                                 | [Type= discrete] [Format=numeric] [Range= 1-1] [Missing=*]                                                                                                                                                                                |       |                   |
| Statistics [NW/ W]                                                                                                                                          | [Valid=4689 /-] [Invalid=0 /-]                                                                                                                                                                                                            |       |                   |
| Pre-question                                                                                                                                                | During the last 12 months have you carried out voluntary, unpaid work for voluntary organisations in any of the following areas:                                                                                                          |       |                   |
| Literal question                                                                                                                                            | Immigrant organisations [Organisations linked to country background, culture, identity outside Norway]                                                                                                                                    |       |                   |
| Interviewer's instructions                                                                                                                                  | [Asked if u=1. ]                                                                                                                                                                                                                          |       |                   |
| Notes                                                                                                                                                       | Innvandrerorganisasjoner[Organisasjoner knyttet til landbakgrunn, kultur, identitet utenfor Norge] (Har du i løpet av de                                                                                                                  |       |                   |
| Value                                                                                                                                                       | Label                                                                                                                                                                                                                                     | Cases | Percentage        |
| 0                                                                                                                                                           |                                                                                                                                                                                                                                           | 1154  | <div></div> 24.6% |
| 1                                                                                                                                                           | Immigrant organisations                                                                                                                                                                                                                   | 16    | <div></div> 0.3%  |
| 97                                                                                                                                                          | No answer                                                                                                                                                                                                                                 | 14    | <div></div> 0.3%  |
| 98                                                                                                                                                          | Not asked                                                                                                                                                                                                                                 | 3505  | <div></div> 74.7% |
| Warning: these figures indicate the number of cases found in the data file. They cannot be interpreted as summary statistics of the population of interest. |                                                                                                                                                                                                                                           |       |                   |

| # r7fri1_16: Volunteering: Other, specify                                                                                                                   |                                                                                                                                  |       |            |
|-------------------------------------------------------------------------------------------------------------------------------------------------------------|----------------------------------------------------------------------------------------------------------------------------------|-------|------------|
| Information                                                                                                                                                 | [Type= discrete] [Format=numeric] [Range= 1-1] [Missing=*]                                                                       |       |            |
| Statistics [NW/ W]                                                                                                                                          | [Valid=4689 /-] [Invalid=0 /-]                                                                                                   |       |            |
| Pre-question                                                                                                                                                | During the last 12 months have you carried out voluntary, unpaid work for voluntary organisations in any of the following areas: |       |            |
| Literal question                                                                                                                                            | Other, specify                                                                                                                   |       |            |
| Interviewer's instructions                                                                                                                                  | [Asked if u=1. ]                                                                                                                 |       |            |
| Notes                                                                                                                                                       | Annet, spesifiser (Har du i løpet av de siste 12 måneder utført frivillig, ulønnet arbeidsinnsats for frivillige orga            |       |            |
| Value                                                                                                                                                       | Label                                                                                                                            | Cases | Percentage |
| 0                                                                                                                                                           |                                                                                                                                  | 1139  | 24.3%      |
| 1                                                                                                                                                           | Other, specify                                                                                                                   | 31    | 0.7%       |
| 97                                                                                                                                                          | No answer                                                                                                                        | 14    | 0.3%       |
| 98                                                                                                                                                          | Not asked                                                                                                                        | 3505  | 74.7%      |
| Warning: these figures indicate the number of cases found in the data file. They cannot be interpreted as summary statistics of the population of interest. |                                                                                                                                  |       |            |
| # r7fri1_16_other: Volunteering: Other, specify [anonymized]                                                                                                |                                                                                                                                  |       |            |
| Information                                                                                                                                                 | [Type= discrete] [Format=character] [Missing=*]                                                                                  |       |            |
| Statistics [NW/ W]                                                                                                                                          | [Valid=4689 /-] [Invalid=0 /-]                                                                                                   |       |            |
| Pre-question                                                                                                                                                | During the last 12 months have you carried out voluntary, unpaid work for voluntary organisations in any of the following areas: |       |            |
| Literal question                                                                                                                                            | Other, specify                                                                                                                   |       |            |
| Interviewer's instructions                                                                                                                                  | [Asked if u=1. ]<br><br>[Data withheld for the sake of anonymity]                                                                |       |            |
| Notes                                                                                                                                                       | Annet, spesifiser (Har du i løpet av de siste 12 måneder utført frivillig, ulønnet arbeidsinnsats for frivillige orga            |       |            |
| Value                                                                                                                                                       | Label                                                                                                                            | Cases | Percentage |
|                                                                                                                                                             |                                                                                                                                  | 4689  | 100.0%     |
| Warning: these figures indicate the number of cases found in the data file. They cannot be interpreted as summary statistics of the population of interest. |                                                                                                                                  |       |            |
| # r7fri1_17: No, not volunteering                                                                                                                           |                                                                                                                                  |       |            |
| Information                                                                                                                                                 | [Type= discrete] [Format=numeric] [Range= 1-1] [Missing=*]                                                                       |       |            |
| Statistics [NW/ W]                                                                                                                                          | [Valid=4689 /-] [Invalid=0 /-]                                                                                                   |       |            |
| Pre-question                                                                                                                                                | During the last 12 months have you carried out voluntary, unpaid work for voluntary organisations in any of the following areas: |       |            |
| Literal question                                                                                                                                            | No                                                                                                                               |       |            |
| Interviewer's instructions                                                                                                                                  | [Asked if u=1. ]                                                                                                                 |       |            |
| Notes                                                                                                                                                       | Nei (Har du i løpet av de siste 12 måneder utført frivillig, ulønnet arbeidsinnsats for frivillige organisasjoner på             |       |            |
| Value                                                                                                                                                       | Label                                                                                                                            | Cases | Percentage |
| 0                                                                                                                                                           |                                                                                                                                  | 795   | 17.0%      |
| 1                                                                                                                                                           | No                                                                                                                               | 375   | 8.0%       |
| 97                                                                                                                                                          | No answer                                                                                                                        | 14    | 0.3%       |
| 98                                                                                                                                                          | Not asked                                                                                                                        | 3505  | 74.7%      |
| Warning: these figures indicate the number of cases found in the data file. They cannot be interpreted as summary statistics of the population of interest. |                                                                                                                                  |       |            |
| # r7fri2: How much time spent volunteering during a week, last year                                                                                         |                                                                                                                                  |       |            |
| Information                                                                                                                                                 | [Type= discrete] [Format=numeric] [Range= 1-5] [Missing=*]                                                                       |       |            |
| Statistics [NW/ W]                                                                                                                                          | [Valid=4689 /-] [Invalid=0 /-]                                                                                                   |       |            |

| # r7fri2: How much time spent volunteering during a week, last year                                                                                         |                                   |                                                                                                                                                                                                         |                        |       |
|-------------------------------------------------------------------------------------------------------------------------------------------------------------|-----------------------------------|---------------------------------------------------------------------------------------------------------------------------------------------------------------------------------------------------------|------------------------|-------|
| Literal question                                                                                                                                            |                                   | If you think about the last year as a whole, roughly how much time did you spend on voluntary work during an ordinary week?                                                                             |                        |       |
| Interviewer's instructions                                                                                                                                  |                                   | [Asked if u=1 and R7FRI1_17!=1. ]                                                                                                                                                                       |                        |       |
| Notes                                                                                                                                                       |                                   | Om du tenker på det siste året under ett, omtrent hvor mye tid brukte du på frivillig arbeid i en vanlig uke?                                                                                           |                        |       |
| Value                                                                                                                                                       | Label                             | Cases                                                                                                                                                                                                   | Percentage             |       |
| 1                                                                                                                                                           | Less than half an hour            | 274                                                                                                                                                                                                     | <div><div></div></div> | 5.8%  |
| 2                                                                                                                                                           | Between half an hour and one hour | 153                                                                                                                                                                                                     | <div><div></div></div> | 3.3%  |
| 3                                                                                                                                                           | 1 to 2 hours                      | 157                                                                                                                                                                                                     | <div><div></div></div> | 3.3%  |
| 4                                                                                                                                                           | 2 to 5 hours                      | 110                                                                                                                                                                                                     | <div><div></div></div> | 2.3%  |
| 5                                                                                                                                                           | More than 5 hours                 | 84                                                                                                                                                                                                      | <div><div></div></div> | 1.8%  |
| 97                                                                                                                                                          | No answer                         | 31                                                                                                                                                                                                      | <div><div></div></div> | 0.7%  |
| 98                                                                                                                                                          | Not asked                         | 3880                                                                                                                                                                                                    | <div><div></div></div> | 82.7% |
| Warning: these figures indicate the number of cases found in the data file. They cannot be interpreted as summary statistics of the population of interest. |                                   |                                                                                                                                                                                                         |                        |       |
| # r7fri1b_1: Volunteered for what within health/nursing/rescue: Health                                                                                      |                                   |                                                                                                                                                                                                         |                        |       |
| Information                                                                                                                                                 |                                   | [Type= discrete] [Format=numeric] [Range= 1-1] [Missing=*]                                                                                                                                              |                        |       |
| Statistics [NW/ W]                                                                                                                                          |                                   | [Valid=4689 /-] [Invalid=0 /-]                                                                                                                                                                          |                        |       |
| Pre-question                                                                                                                                                |                                   | You have answered that you have carried out voluntary, unpaid work for voluntary organisations within health, nursing and rescue work. Within which of these areas have you carried out voluntary work? |                        |       |
| Literal question                                                                                                                                            |                                   | Health                                                                                                                                                                                                  |                        |       |
| Interviewer's instructions                                                                                                                                  |                                   | [Asked if u=1 and R7FRI1_5=1. ]                                                                                                                                                                         |                        |       |
| Notes                                                                                                                                                       |                                   | Helse (Du har svart at du har utført frivillig, ulønnet arbeidsinnsats for frivillige organisasjoner innenfor helse, pl                                                                                 |                        |       |
| Value                                                                                                                                                       | Label                             | Cases                                                                                                                                                                                                   | Percentage             |       |
| 0                                                                                                                                                           |                                   | 33                                                                                                                                                                                                      | <div><div></div></div> | 0.7%  |
| 1                                                                                                                                                           | Health                            | 31                                                                                                                                                                                                      | <div><div></div></div> | 0.7%  |
| 97                                                                                                                                                          | No answer                         | 1                                                                                                                                                                                                       | <div><div></div></div> | 0.0%  |
| 98                                                                                                                                                          | Not asked                         | 4624                                                                                                                                                                                                    | <div><div></div></div> | 98.6% |
| Warning: these figures indicate the number of cases found in the data file. They cannot be interpreted as summary statistics of the population of interest. |                                   |                                                                                                                                                                                                         |                        |       |
| # r7fri1b_2: Volunteered for what within health/nursing/rescue: Nursing                                                                                     |                                   |                                                                                                                                                                                                         |                        |       |
| Information                                                                                                                                                 |                                   | [Type= discrete] [Format=numeric] [Range= 1-1] [Missing=*]                                                                                                                                              |                        |       |
| Statistics [NW/ W]                                                                                                                                          |                                   | [Valid=4689 /-] [Invalid=0 /-]                                                                                                                                                                          |                        |       |
| Pre-question                                                                                                                                                |                                   | You have answered that you have carried out voluntary, unpaid work for voluntary organisations within health, nursing and rescue work. Within which of these areas have you carried out voluntary work? |                        |       |
| Literal question                                                                                                                                            |                                   | Nursing                                                                                                                                                                                                 |                        |       |
| Interviewer's instructions                                                                                                                                  |                                   | [Asked if u=1 and R7FRI1_5=1. ]                                                                                                                                                                         |                        |       |
| Notes                                                                                                                                                       |                                   | Pleie (Du har svart at du har utført frivillig, ulønnet arbeidsinnsats for frivillige organisasjoner innenfor helse, pl                                                                                 |                        |       |
| Value                                                                                                                                                       | Label                             | Cases                                                                                                                                                                                                   | Percentage             |       |
| 0                                                                                                                                                           |                                   | 36                                                                                                                                                                                                      | <div><div></div></div> | 0.8%  |
| 1                                                                                                                                                           | Nursing                           | 28                                                                                                                                                                                                      | <div><div></div></div> | 0.6%  |
| 97                                                                                                                                                          | No answer                         | 1                                                                                                                                                                                                       | <div><div></div></div> | 0.0%  |
| 98                                                                                                                                                          | Not asked                         | 4624                                                                                                                                                                                                    | <div><div></div></div> | 98.6% |
| Warning: these figures indicate the number of cases found in the data file. They cannot be interpreted as summary statistics of the population of interest. |                                   |                                                                                                                                                                                                         |                        |       |
| # r7fri1b_3: Volunteered for what within health/nursing/rescue: Emergency/Rescue work                                                                       |                                   |                                                                                                                                                                                                         |                        |       |
| Information                                                                                                                                                 |                                   | [Type= discrete] [Format=numeric] [Range= 1-1] [Missing=*]                                                                                                                                              |                        |       |

| # r7fri1b_3: Volunteered for what within health/nursing/rescue: Emergency/Rescue work                                                                       |                                                                                                                                                                                                                                                                                                                                                           |       |            |
|-------------------------------------------------------------------------------------------------------------------------------------------------------------|-----------------------------------------------------------------------------------------------------------------------------------------------------------------------------------------------------------------------------------------------------------------------------------------------------------------------------------------------------------|-------|------------|
| Statistics [NW/ W]                                                                                                                                          | [Valid=4689 /-] [Invalid=0 /-]                                                                                                                                                                                                                                                                                                                            |       |            |
| Pre-question                                                                                                                                                | You have answered that you have carried out voluntary, unpaid work for voluntary organisations within health, nursing and rescue work. Within which of these areas have you carried out voluntary work?                                                                                                                                                   |       |            |
| Literal question                                                                                                                                            | Emergency/Rescue work                                                                                                                                                                                                                                                                                                                                     |       |            |
| Interviewer's instructions                                                                                                                                  | [Asked if u=1 and R7FRI1_5=1. ]                                                                                                                                                                                                                                                                                                                           |       |            |
| Notes                                                                                                                                                       | Beredskap/Redningsarbeid (Du har svart at du har utført frivillig, ulønnet arbeidsinnsats for frivillige organisasjoner)                                                                                                                                                                                                                                  |       |            |
| Value                                                                                                                                                       | Label                                                                                                                                                                                                                                                                                                                                                     | Cases | Percentage |
| 0                                                                                                                                                           |                                                                                                                                                                                                                                                                                                                                                           | 51    | 1.1%       |
| 1                                                                                                                                                           | Emergency/Rescue work                                                                                                                                                                                                                                                                                                                                     | 13    | 0.3%       |
| 97                                                                                                                                                          | No answer                                                                                                                                                                                                                                                                                                                                                 | 1     | 0.0%       |
| 98                                                                                                                                                          | Not asked                                                                                                                                                                                                                                                                                                                                                 | 4624  | 98.6%      |
| Warning: these figures indicate the number of cases found in the data file. They cannot be interpreted as summary statistics of the population of interest. |                                                                                                                                                                                                                                                                                                                                                           |       |            |
| # r7fri4_1: Knowledge of emergency work in Norway                                                                                                           |                                                                                                                                                                                                                                                                                                                                                           |       |            |
| Information                                                                                                                                                 | [Type= discrete] [Format=numeric] [Range= 1-5] [Missing=*]                                                                                                                                                                                                                                                                                                |       |            |
| Statistics [NW/ W]                                                                                                                                          | [Valid=4689 /-] [Invalid=0 /-]                                                                                                                                                                                                                                                                                                                            |       |            |
| Pre-question                                                                                                                                                | When someone is missing, has been injured out in nature or when large accidents occur, an extensive apparatus of volunteers is activated to assist the police in searching for missing persons. These volunteers are members of different emergency response organisations and have undergone training in searching, tracking, first aid, navigation etc. |       |            |
| Literal question                                                                                                                                            | How good is your knowledge of emergency work in Norway?                                                                                                                                                                                                                                                                                                   |       |            |
| Interviewer's instructions                                                                                                                                  | [Asked if u=1. ]                                                                                                                                                                                                                                                                                                                                          |       |            |
| Notes                                                                                                                                                       | Hvor godt vil du si at du kjenner til beredskapsarbeidet i Norge? (Når noen er savnet, har blitt skadet ute i naturen el                                                                                                                                                                                                                                  |       |            |
| Value                                                                                                                                                       | Label                                                                                                                                                                                                                                                                                                                                                     | Cases | Percentage |
| 1                                                                                                                                                           | Very good                                                                                                                                                                                                                                                                                                                                                 | 41    | 0.9%       |
| 2                                                                                                                                                           | Good                                                                                                                                                                                                                                                                                                                                                      | 432   | 9.2%       |
| 3                                                                                                                                                           | Slightly                                                                                                                                                                                                                                                                                                                                                  | 532   | 11.3%      |
| 4                                                                                                                                                           | Very little                                                                                                                                                                                                                                                                                                                                               | 129   | 2.8%       |
| 5                                                                                                                                                           | Not at all                                                                                                                                                                                                                                                                                                                                                | 27    | 0.6%       |
| 97                                                                                                                                                          | No answer                                                                                                                                                                                                                                                                                                                                                 | 23    | 0.5%       |
| 98                                                                                                                                                          | Not asked                                                                                                                                                                                                                                                                                                                                                 | 3505  | 74.7%      |
| Warning: these figures indicate the number of cases found in the data file. They cannot be interpreted as summary statistics of the population of interest. |                                                                                                                                                                                                                                                                                                                                                           |       |            |
| # r7fri4_2: Knowledge of voluntary emergency organisations                                                                                                  |                                                                                                                                                                                                                                                                                                                                                           |       |            |
| Information                                                                                                                                                 | [Type= discrete] [Format=numeric] [Range= 1-5] [Missing=*]                                                                                                                                                                                                                                                                                                |       |            |
| Statistics [NW/ W]                                                                                                                                          | [Valid=4689 /-] [Invalid=0 /-]                                                                                                                                                                                                                                                                                                                            |       |            |
| Pre-question                                                                                                                                                | When someone is missing, has been injured out in nature or when large accidents occur, an extensive apparatus of volunteers is activated to assist the police in searching for missing persons. These volunteers are members of different emergency response organisations and have undergone training in searching, tracking, first aid, navigation etc. |       |            |
| Literal question                                                                                                                                            | How good is your knowledge of the voluntary emergency organisations?                                                                                                                                                                                                                                                                                      |       |            |
| Interviewer's instructions                                                                                                                                  | [Asked if u=1. ]                                                                                                                                                                                                                                                                                                                                          |       |            |
| Notes                                                                                                                                                       | Hvor godt vil du si at du kjenner til de frivillige beredskapsorganisasjonene? (Når noen er savnet, har blitt skadet ute                                                                                                                                                                                                                                  |       |            |
| Value                                                                                                                                                       | Label                                                                                                                                                                                                                                                                                                                                                     | Cases | Percentage |
| 1                                                                                                                                                           | Very good                                                                                                                                                                                                                                                                                                                                                 | 30    | 0.6%       |
| 2                                                                                                                                                           | Good                                                                                                                                                                                                                                                                                                                                                      | 442   | 9.4%       |
| 3                                                                                                                                                           | Slightly                                                                                                                                                                                                                                                                                                                                                  | 544   | 11.6%      |
| 4                                                                                                                                                           | Very little                                                                                                                                                                                                                                                                                                                                               | 113   | 2.4%       |



| # r7fri4_2: Knowledge of voluntary emergency organisations                                                                                                  |                                                                                                 |       |            |
|-------------------------------------------------------------------------------------------------------------------------------------------------------------|-------------------------------------------------------------------------------------------------|-------|------------|
| Value                                                                                                                                                       | Label                                                                                           | Cases | Percentage |
| 5                                                                                                                                                           | Not at all                                                                                      | 28    | 0.6%       |
| 97                                                                                                                                                          | No answer                                                                                       | 27    | 0.6%       |
| 98                                                                                                                                                          | Not asked                                                                                       | 3505  | 74.7%      |
| Warning: these figures indicate the number of cases found in the data file. They cannot be interpreted as summary statistics of the population of interest. |                                                                                                 |       |            |
| # r7fri4c_1: Aware of voluntary emergency organisations: NAK air services                                                                                   |                                                                                                 |       |            |
| Information                                                                                                                                                 | [Type= discrete] [Format=numeric] [Range= 1-1] [Missing=*]                                      |       |            |
| Statistics [NW/ W]                                                                                                                                          | [Valid=4689 /-] [Invalid=0 /-]                                                                  |       |            |
| Pre-question                                                                                                                                                | Which of these voluntary emergency organisations are you aware of?                              |       |            |
| Literal question                                                                                                                                            | NAK air services                                                                                |       |            |
| Interviewer's instructions                                                                                                                                  | [Asked if u=1. ]                                                                                |       |            |
| Notes                                                                                                                                                       | NAKs flytjeneste (Hvilke av disse frivillige beredskapsorganisasjonene har du hørt om?)         |       |            |
| Value                                                                                                                                                       | Label                                                                                           | Cases | Percentage |
| 0                                                                                                                                                           |                                                                                                 | 1113  | 23.7%      |
| 1                                                                                                                                                           | NAK air services                                                                                | 55    | 1.2%       |
| 97                                                                                                                                                          | No answer                                                                                       | 16    | 0.3%       |
| 98                                                                                                                                                          | Not asked                                                                                       | 3505  | 74.7%      |
| Warning: these figures indicate the number of cases found in the data file. They cannot be interpreted as summary statistics of the population of interest. |                                                                                                 |       |            |
| # r7fri4c_2: Aware of voluntary emergency organisations: Norwegian rescue dogs                                                                              |                                                                                                 |       |            |
| Information                                                                                                                                                 | [Type= discrete] [Format=numeric] [Range= 1-1] [Missing=*]                                      |       |            |
| Statistics [NW/ W]                                                                                                                                          | [Valid=4689 /-] [Invalid=0 /-]                                                                  |       |            |
| Pre-question                                                                                                                                                | Which of these voluntary emergency organisations are you aware of?                              |       |            |
| Literal question                                                                                                                                            | Norwegian rescue dogs                                                                           |       |            |
| Interviewer's instructions                                                                                                                                  | [Asked if u=1. ]                                                                                |       |            |
| Notes                                                                                                                                                       | Norske redningshunder (Hvilke av disse frivillige beredskapsorganisasjonene har du hørt om?)    |       |            |
| Value                                                                                                                                                       | Label                                                                                           | Cases | Percentage |
| 0                                                                                                                                                           |                                                                                                 | 326   | 7.0%       |
| 1                                                                                                                                                           | Norwegian rescue dogs                                                                           | 842   | 18.0%      |
| 97                                                                                                                                                          | No answer                                                                                       | 16    | 0.3%       |
| 98                                                                                                                                                          | Not asked                                                                                       | 3505  | 74.7%      |
| Warning: these figures indicate the number of cases found in the data file. They cannot be interpreted as summary statistics of the population of interest. |                                                                                                 |       |            |
| # r7fri4c_3: Aware of voluntary emergency organisations: Norwegian People's Aid First Aid and Rescue services                                               |                                                                                                 |       |            |
| Information                                                                                                                                                 | [Type= discrete] [Format=numeric] [Range= 1-1] [Missing=*]                                      |       |            |
| Statistics [NW/ W]                                                                                                                                          | [Valid=4689 /-] [Invalid=0 /-]                                                                  |       |            |
| Pre-question                                                                                                                                                | Which of these voluntary emergency organisations are you aware of?                              |       |            |
| Literal question                                                                                                                                            | Norsk Folkehjelp Sanitet (Norwegian People's Aid First Aid and Rescue services)                 |       |            |
| Interviewer's instructions                                                                                                                                  | [Asked if u=1. ]                                                                                |       |            |
| Notes                                                                                                                                                       | Norsk Folkehjelp Sanitet (Hvilke av disse frivillige beredskapsorganisasjonene har du hørt om?) |       |            |
| Value                                                                                                                                                       | Label                                                                                           | Cases | Percentage |
| 0                                                                                                                                                           |                                                                                                 | 292   | 6.2%       |
| 1                                                                                                                                                           | Norsk Folkehjelp Sanitet (Norwegian People's Aid First Aid and Rescue services)                 | 876   | 18.7%      |
| 97                                                                                                                                                          | No answer                                                                                       | 16    | 0.3%       |

| # r7fri4c_3: Aware of voluntary emergency organisations: Norwegian People's Aid First Aid and Rescue services                                               |                                                                                                  |       |            |
|-------------------------------------------------------------------------------------------------------------------------------------------------------------|--------------------------------------------------------------------------------------------------|-------|------------|
| Value                                                                                                                                                       | Label                                                                                            | Cases | Percentage |
| 98                                                                                                                                                          | Not asked                                                                                        | 3505  | 74.7%      |
| Warning: these figures indicate the number of cases found in the data file. They cannot be interpreted as summary statistics of the population of interest. |                                                                                                  |       |            |
| # r7fri4c_4: Aware of voluntary emergency organisations: Norwegian Speleological Society                                                                    |                                                                                                  |       |            |
| Information                                                                                                                                                 | [Type= discrete] [Format=numeric] [Range= 1-1] [Missing=*]                                       |       |            |
| Statistics [NW/ W]                                                                                                                                          | [Valid=4689 /-] [Invalid=0 /-]                                                                   |       |            |
| Pre-question                                                                                                                                                | Which of these voluntary emergency organisations are you aware of?                               |       |            |
| Literal question                                                                                                                                            | Norwegian Speleological Society                                                                  |       |            |
| Interviewer's instructions                                                                                                                                  | [Asked if u=1. ]                                                                                 |       |            |
| Notes                                                                                                                                                       | Norsk Grotteforbund (Hvilke av disse frivillige beredskapsorganisasjonene har du hørt om?)       |       |            |
| Value                                                                                                                                                       | Label                                                                                            | Cases | Percentage |
| 0                                                                                                                                                           |                                                                                                  | 1120  | 23.9%      |
| 1                                                                                                                                                           | Norwegian Speleological Society                                                                  | 48    | 1.0%       |
| 97                                                                                                                                                          | No answer                                                                                        | 16    | 0.3%       |
| 98                                                                                                                                                          | Not asked                                                                                        | 3505  | 74.7%      |
| Warning: these figures indicate the number of cases found in the data file. They cannot be interpreted as summary statistics of the population of interest. |                                                                                                  |       |            |
| # r7fri4c_5: Aware of voluntary emergency organisations: Norwegian Radio Relay League                                                                       |                                                                                                  |       |            |
| Information                                                                                                                                                 | [Type= discrete] [Format=numeric] [Range= 1-1] [Missing=*]                                       |       |            |
| Statistics [NW/ W]                                                                                                                                          | [Valid=4689 /-] [Invalid=0 /-]                                                                   |       |            |
| Pre-question                                                                                                                                                | Which of these voluntary emergency organisations are you aware of?                               |       |            |
| Literal question                                                                                                                                            | Norwegian Radio Relay League (amateur radio organisation)                                        |       |            |
| Interviewer's instructions                                                                                                                                  | [Asked if u=1. ]                                                                                 |       |            |
| Notes                                                                                                                                                       | Norsk Radio Relæ Liga (Hvilke av disse frivillige beredskapsorganisasjonene har du hørt om?)     |       |            |
| Value                                                                                                                                                       | Label                                                                                            | Cases | Percentage |
| 0                                                                                                                                                           |                                                                                                  | 1076  | 22.9%      |
| 1                                                                                                                                                           | Norwegian Radio Relay League (amateur radio organisation)                                        | 92    | 2.0%       |
| 97                                                                                                                                                          | No answer                                                                                        | 16    | 0.3%       |
| 98                                                                                                                                                          | Not asked                                                                                        | 3505  | 74.7%      |
| Warning: these figures indicate the number of cases found in the data file. They cannot be interpreted as summary statistics of the population of interest. |                                                                                                  |       |            |
| # r7fri4c_6: Aware of voluntary emergency organisations: Rovers response group                                                                              |                                                                                                  |       |            |
| Information                                                                                                                                                 | [Type= discrete] [Format=numeric] [Range= 1-1] [Missing=*]                                       |       |            |
| Statistics [NW/ W]                                                                                                                                          | [Valid=4689 /-] [Invalid=0 /-]                                                                   |       |            |
| Pre-question                                                                                                                                                | Which of these voluntary emergency organisations are you aware of?                               |       |            |
| Literal question                                                                                                                                            | Rovernes Beredskapsgruppe (The Norwegian Guide and Scout Association - Rovers response group)    |       |            |
| Interviewer's instructions                                                                                                                                  | [Asked if u=1. ]                                                                                 |       |            |
| Notes                                                                                                                                                       | Rovernes Beredskapsgruppe (Hvilke av disse frivillige beredskapsorganisasjonene har du hørt om?) |       |            |
| Value                                                                                                                                                       | Label                                                                                            | Cases | Percentage |
| 0                                                                                                                                                           |                                                                                                  | 1089  | 23.2%      |
| 1                                                                                                                                                           | Rovernes Beredskapsgruppe (The Norwegian Guide and Scout Association - Rovers response group)    | 79    | 1.7%       |
| 97                                                                                                                                                          | No answer                                                                                        | 16    | 0.3%       |
| 98                                                                                                                                                          | Not asked                                                                                        | 3505  | 74.7%      |
| Warning: these figures indicate the number of cases found in the data file. They cannot be interpreted as summary statistics of the population of interest. |                                                                                                  |       |            |

| # r7fri4c_7: Aware of voluntary emergency organisations: The Norwegian Red Cross                                                                            |                                                                                                |       |            |
|-------------------------------------------------------------------------------------------------------------------------------------------------------------|------------------------------------------------------------------------------------------------|-------|------------|
| Information                                                                                                                                                 | [Type= discrete] [Format=numeric] [Range= 1-1] [Missing=*]                                     |       |            |
| Statistics [NW/ W]                                                                                                                                          | [Valid=4689 /-] [Invalid=0 /-]                                                                 |       |            |
| Pre-question                                                                                                                                                | Which of these voluntary emergency organisations are you aware of?                             |       |            |
| Literal question                                                                                                                                            | The Norwegian Red Cross                                                                        |       |            |
| Interviewer's instructions                                                                                                                                  | [Asked if u=1. ]                                                                               |       |            |
| Notes                                                                                                                                                       | Røde Kors Hjelpekorps (Hvilke av disse frivillige beredskapsorganisasjonene har du hørt om?)   |       |            |
| Value                                                                                                                                                       | Label                                                                                          | Cases | Percentage |
| 0                                                                                                                                                           |                                                                                                | 22    | 0.5%       |
| 1                                                                                                                                                           | The Norwegian Red Cross                                                                        | 1146  | 24.4%      |
| 97                                                                                                                                                          | No answer                                                                                      | 16    | 0.3%       |
| 98                                                                                                                                                          | Not asked                                                                                      | 3505  | 74.7%      |
| Warning: these figures indicate the number of cases found in the data file. They cannot be interpreted as summary statistics of the population of interest. |                                                                                                |       |            |
| # r7fri4c_8: Aware of voluntary emergency organisations: The Norwegian Society for Sea Rescue                                                               |                                                                                                |       |            |
| Information                                                                                                                                                 | [Type= discrete] [Format=numeric] [Range= 1-1] [Missing=*]                                     |       |            |
| Statistics [NW/ W]                                                                                                                                          | [Valid=4689 /-] [Invalid=0 /-]                                                                 |       |            |
| Pre-question                                                                                                                                                | Which of these voluntary emergency organisations are you aware of?                             |       |            |
| Literal question                                                                                                                                            | The Norwegian Society for Sea Rescue                                                           |       |            |
| Interviewer's instructions                                                                                                                                  | [Asked if u=1. ]                                                                               |       |            |
| Notes                                                                                                                                                       | Redningsselskapet (Hvilke av disse frivillige beredskapsorganisasjonene har du hørt om?)       |       |            |
| Value                                                                                                                                                       | Label                                                                                          | Cases | Percentage |
| 0                                                                                                                                                           |                                                                                                | 74    | 1.6%       |
| 1                                                                                                                                                           | The Norwegian Society for Sea Rescue                                                           | 1094  | 23.3%      |
| 97                                                                                                                                                          | No answer                                                                                      | 16    | 0.3%       |
| 98                                                                                                                                                          | Not asked                                                                                      | 3505  | 74.7%      |
| Warning: these figures indicate the number of cases found in the data file. They cannot be interpreted as summary statistics of the population of interest. |                                                                                                |       |            |
| # r7fri4d: Member of an organisation which takes part in emergency response work in Norway                                                                  |                                                                                                |       |            |
| Information                                                                                                                                                 | [Type= discrete] [Format=numeric] [Range= 1-2] [Missing=*]                                     |       |            |
| Statistics [NW/ W]                                                                                                                                          | [Valid=4689 /-] [Invalid=0 /-]                                                                 |       |            |
| Literal question                                                                                                                                            | Are you a member of an organisation which takes part in the emergency response work in Norway? |       |            |
| Interviewer's instructions                                                                                                                                  | [Asked if u=1. ]                                                                               |       |            |
| Value                                                                                                                                                       | Label                                                                                          | Cases | Percentage |
| 1                                                                                                                                                           | Yes                                                                                            | 154   | 3.3%       |
| 2                                                                                                                                                           | No                                                                                             | 1004  | 21.4%      |
| 97                                                                                                                                                          | No answer                                                                                      | 26    | 0.6%       |
| 98                                                                                                                                                          | Not asked                                                                                      | 3505  | 74.7%      |
| Warning: these figures indicate the number of cases found in the data file. They cannot be interpreted as summary statistics of the population of interest. |                                                                                                |       |            |
| # r7fri4e: Participated as a volunteer in a search and rescue action                                                                                        |                                                                                                |       |            |
| Information                                                                                                                                                 | [Type= discrete] [Format=numeric] [Range= 1-3] [Missing=*]                                     |       |            |
| Statistics [NW/ W]                                                                                                                                          | [Valid=4689 /-] [Invalid=0 /-]                                                                 |       |            |
| Literal question                                                                                                                                            | Have you participated as a volunteer in a search and rescue action?                            |       |            |
| Interviewer's instructions                                                                                                                                  | [Asked if u=1. ]                                                                               |       |            |

| # r7fri4e: Participated as a volunteer in a search and rescue action                                                                                                      |                                                                                                                                                                                                                                  |       |                        |       |
|---------------------------------------------------------------------------------------------------------------------------------------------------------------------------|----------------------------------------------------------------------------------------------------------------------------------------------------------------------------------------------------------------------------------|-------|------------------------|-------|
| Value                                                                                                                                                                     | Label                                                                                                                                                                                                                            | Cases | Percentage             |       |
| 1                                                                                                                                                                         | Yes, several times                                                                                                                                                                                                               | 58    | <div><div></div></div> | 1.2%  |
| 2                                                                                                                                                                         | Yes, once                                                                                                                                                                                                                        | 102   | <div><div></div></div> | 2.2%  |
| 3                                                                                                                                                                         | No                                                                                                                                                                                                                               | 997   | <div><div></div></div> | 21.3% |
| 97                                                                                                                                                                        | No answer                                                                                                                                                                                                                        | 27    | <div><div></div></div> | 0.6%  |
| 98                                                                                                                                                                        | Not asked                                                                                                                                                                                                                        | 3505  | <div><div></div></div> | 74.7% |
| Warning: these figures indicate the number of cases found in the data file. They cannot be interpreted as summary statistics of the population of interest.               |                                                                                                                                                                                                                                  |       |                        |       |
| # r7fri4f: Has assisted the police/voluntary organisation as a volunteer during an accident                                                                               |                                                                                                                                                                                                                                  |       |                        |       |
| Information                                                                                                                                                               | [Type= discrete] [Format=numeric] [Range= 1-3] [Missing=*]                                                                                                                                                                       |       |                        |       |
| Statistics [NW/ W]                                                                                                                                                        | [Valid=4689 /-] [Invalid=0 /-]                                                                                                                                                                                                   |       |                        |       |
| Literal question                                                                                                                                                          | Have you as a volunteer assisted the police or a voluntary organisation during an accident?                                                                                                                                      |       |                        |       |
| Interviewer's instructions                                                                                                                                                | [Asked if u=1. ]                                                                                                                                                                                                                 |       |                        |       |
| Notes                                                                                                                                                                     | Har du som frivillig bistått politi eller frivillige organisasjoner ved en ulykke?                                                                                                                                               |       |                        |       |
| Value                                                                                                                                                                     | Label                                                                                                                                                                                                                            | Cases | Percentage             |       |
| 1                                                                                                                                                                         | Yes, several times                                                                                                                                                                                                               | 61    | <div><div></div></div> | 1.3%  |
| 2                                                                                                                                                                         | Yes, once                                                                                                                                                                                                                        | 118   | <div><div></div></div> | 2.5%  |
| 3                                                                                                                                                                         | No                                                                                                                                                                                                                               | 962   | <div><div></div></div> | 20.5% |
| 97                                                                                                                                                                        | No answer                                                                                                                                                                                                                        | 43    | <div><div></div></div> | 0.9%  |
| 98                                                                                                                                                                        | Not asked                                                                                                                                                                                                                        | 3505  | <div><div></div></div> | 74.7% |
| Warning: these figures indicate the number of cases found in the data file. They cannot be interpreted as summary statistics of the population of interest.               |                                                                                                                                                                                                                                  |       |                        |       |
| # r7ran38: [Randomizes if u=1 and R7FRI4d=2. ]                                                                                                                            |                                                                                                                                                                                                                                  |       |                        |       |
| Information                                                                                                                                                               | [Type= discrete] [Format=numeric] [Range= 1-2] [Missing=*]                                                                                                                                                                       |       |                        |       |
| Statistics [NW/ W]                                                                                                                                                        | [Valid=1004 /-] [Invalid=3685 /-]                                                                                                                                                                                                |       |                        |       |
| Interviewer's instructions                                                                                                                                                | [Randomizes if u=1 and R7FRI4d=2. ]                                                                                                                                                                                              |       |                        |       |
| Value                                                                                                                                                                     | Label                                                                                                                                                                                                                            | Cases | Percentage             |       |
| 1                                                                                                                                                                         | 1                                                                                                                                                                                                                                | 503   | <div><div></div></div> | 50.1% |
| 2                                                                                                                                                                         | 2                                                                                                                                                                                                                                | 501   | <div><div></div></div> | 49.9% |
| Sysmiss                                                                                                                                                                   |                                                                                                                                                                                                                                  | 3685  |                        |       |
| Warning: these figures indicate the number of cases found in the data file. They cannot be interpreted as summary statistics of the population of interest.               |                                                                                                                                                                                                                                  |       |                        |       |
| # r7fri4g: Are you interested in becoming a member of such an organisation? (Members of emergency organisations undergoes courses and must be ready at a moments notice). |                                                                                                                                                                                                                                  |       |                        |       |
| Information                                                                                                                                                               | [Type= discrete] [Format=numeric] [Range= 1-3] [Missing=*]                                                                                                                                                                       |       |                        |       |
| Statistics [NW/ W]                                                                                                                                                        | [Valid=4689 /-] [Invalid=0 /-]                                                                                                                                                                                                   |       |                        |       |
| Pre-question                                                                                                                                                              | Members of emergency response organisations must undergo several different training courses in areas like first aid, navigation, communication and wilderness tracking. These must also be ready for action at a moments notice. |       |                        |       |
| Literal question                                                                                                                                                          | Are you interested in becoming a member of such an organisation?                                                                                                                                                                 |       |                        |       |
| Interviewer's instructions                                                                                                                                                | [Asked if u=1 and ran38=1. ]                                                                                                                                                                                                     |       |                        |       |
| Notes                                                                                                                                                                     | Medlemmer i beredskapsorganisasjoner må gjennomføre flere ulike kurs innenfor områder som førstehjelp, navigasjon, sa                                                                                                            |       |                        |       |
| Value                                                                                                                                                                     | Label                                                                                                                                                                                                                            | Cases | Percentage             |       |
| 1                                                                                                                                                                         | Yes                                                                                                                                                                                                                              | 112   | <div><div></div></div> | 2.4%  |
| 2                                                                                                                                                                         | No                                                                                                                                                                                                                               | 177   | <div><div></div></div> | 3.8%  |
| 3                                                                                                                                                                         | Don't know                                                                                                                                                                                                                       | 211   | <div><div></div></div> | 4.5%  |
| 97                                                                                                                                                                        | No answer                                                                                                                                                                                                                        | 3     | <div><div></div></div> | 0.1%  |

**# r7fri4g: Are you interested in becoming a member of such an organisation? (Members of emergency organisations undergoes courses and must be ready at a moments notice).**

| Value | Label     | Cases | Percentage |
|-------|-----------|-------|------------|
| 98    | Not asked | 4186  | 89.3%      |

*Warning: these figures indicate the number of cases found in the data file. They cannot be interpreted as summary statistics of the population of interest.*

**# r7fri4g1: If no, why not? [anonymized]**

|                                   |                                                                                         |
|-----------------------------------|-----------------------------------------------------------------------------------------|
| <b>Information</b>                | [Type= discrete] [Format=character] [Missing=*]                                         |
| <b>Statistics [NW/ W]</b>         | [Valid=4689 /-] [Invalid=0 /-]                                                          |
| <b>Literal question</b>           | If no, why not?                                                                         |
| <b>Interviewer's instructions</b> | [Asked if u=1 and ran38=1 AND R7FRI4g=2. ]<br>[Data withheld for the sake of anonymity] |

| Value | Label | Cases | Percentage |
|-------|-------|-------|------------|
|       |       | 4689  | 100.0%     |

*Warning: these figures indicate the number of cases found in the data file. They cannot be interpreted as summary statistics of the population of interest.*

**# r7fri4h: Are you interested in becoming a member of an emergency response organisation?**

|                                   |                                                                                |
|-----------------------------------|--------------------------------------------------------------------------------|
| <b>Information</b>                | [Type= discrete] [Format=numeric] [Range= 1-3] [Missing=*]                     |
| <b>Statistics [NW/ W]</b>         | [Valid=4689 /-] [Invalid=0 /-]                                                 |
| <b>Literal question</b>           | Are you interested in becoming a member of an emergency response organisation? |
| <b>Interviewer's instructions</b> | [Asked if u=1 and ran38=2. ]                                                   |

| Value | Label      | Cases | Percentage |
|-------|------------|-------|------------|
| 1     | Yes        | 90    | 1.9%       |
| 2     | No         | 135   | 2.9%       |
| 3     | Don't know | 271   | 5.8%       |
| 97    | No answer  | 5     | 0.1%       |
| 98    | Not asked  | 4188  | 89.3%      |

*Warning: these figures indicate the number of cases found in the data file. They cannot be interpreted as summary statistics of the population of interest.*

**# r7fri4h1: If no, why not? [anonymized]**

|                                   |                                                                                         |
|-----------------------------------|-----------------------------------------------------------------------------------------|
| <b>Information</b>                | [Type= discrete] [Format=character] [Missing=*]                                         |
| <b>Statistics [NW/ W]</b>         | [Valid=4689 /-] [Invalid=0 /-]                                                          |
| <b>Literal question</b>           | If no, why not?                                                                         |
| <b>Interviewer's instructions</b> | [Asked if u=1 and ran38=2 AND R7FRI4h=2. ]<br>[Data withheld for the sake of anonymity] |

| Value | Label | Cases | Percentage |
|-------|-------|-------|------------|
|       |       | 4689  | 100.0%     |

*Warning: these figures indicate the number of cases found in the data file. They cannot be interpreted as summary statistics of the population of interest.*

**# r7fri4i: Likelihood of participation in search and rescue operation: Asked by the police**

|                                   |                                                                                                                                     |
|-----------------------------------|-------------------------------------------------------------------------------------------------------------------------------------|
| <b>Information</b>                | [Type= discrete] [Format=numeric] [Range= 1-5] [Missing=*]                                                                          |
| <b>Statistics [NW/ W]</b>         | [Valid=4689 /-] [Invalid=0 /-]                                                                                                      |
| <b>Literal question</b>           | If you were asked by the police to participate in a search and rescue operation, how likely is it that you would have participated? |
| <b>Interviewer's instructions</b> | [Asked if u=1. ]                                                                                                                    |
| <b>Notes</b>                      | Dersom du ble spurt av politiet om å bistå ved et søk og redningsoppdrag, hvor sannsynlig er det at du ville deltatt?               |

| # r7fri4i: Likelihood of participation in search and rescue operation: Asked by the police                                                                  |                                                                                                                                                          |       |                        |       |
|-------------------------------------------------------------------------------------------------------------------------------------------------------------|----------------------------------------------------------------------------------------------------------------------------------------------------------|-------|------------------------|-------|
| Value                                                                                                                                                       | Label                                                                                                                                                    | Cases | Percentage             |       |
| 1                                                                                                                                                           | Very likely                                                                                                                                              | 597   | <div><div></div></div> | 12.7% |
| 2                                                                                                                                                           | Most likely                                                                                                                                              | 400   | <div><div></div></div> | 8.5%  |
| 3                                                                                                                                                           | Neither one way or the other                                                                                                                             | 73    | <div><div></div></div> | 1.6%  |
| 4                                                                                                                                                           | Most unlikely                                                                                                                                            | 54    | <div><div></div></div> | 1.2%  |
| 5                                                                                                                                                           | Very unlikely                                                                                                                                            | 39    | <div><div></div></div> | 0.8%  |
| 97                                                                                                                                                          | No answer                                                                                                                                                | 21    | <div><div></div></div> | 0.4%  |
| 98                                                                                                                                                          | Not asked                                                                                                                                                | 3505  | <div><div></div></div> | 74.7% |
| Warning: these figures indicate the number of cases found in the data file. They cannot be interpreted as summary statistics of the population of interest. |                                                                                                                                                          |       |                        |       |
| # r7fri4j: Likelihood of participation in search and rescue operation: Asked by voluntary organisation                                                      |                                                                                                                                                          |       |                        |       |
| Information                                                                                                                                                 | [Type= discrete] [Format=numeric] [Range= 1-5] [Missing=*]                                                                                               |       |                        |       |
| Statistics [NW/ W]                                                                                                                                          | [Valid=4689 /-] [Invalid=0 /-]                                                                                                                           |       |                        |       |
| Literal question                                                                                                                                            | If you were asked by a voluntary organisation to participate in a search and rescue operation, how likely is it that you would have participated?        |       |                        |       |
| Interviewer's instructions                                                                                                                                  | [Asked if u=1. ]                                                                                                                                         |       |                        |       |
| Notes                                                                                                                                                       | Dersom du ble bedt av en frivillig organisasjon om å bistå ved et søk og redningsoppdrag, hvor sannsynlig er det at du                                   |       |                        |       |
| Value                                                                                                                                                       | Label                                                                                                                                                    | Cases | Percentage             |       |
| 1                                                                                                                                                           | Very likely                                                                                                                                              | 425   | <div><div></div></div> | 9.1%  |
| 2                                                                                                                                                           | Most likely                                                                                                                                              | 475   | <div><div></div></div> | 10.1% |
| 3                                                                                                                                                           | Neither one way or the other                                                                                                                             | 145   | <div><div></div></div> | 3.1%  |
| 4                                                                                                                                                           | Most unlikely                                                                                                                                            | 61    | <div><div></div></div> | 1.3%  |
| 5                                                                                                                                                           | Very unlikely                                                                                                                                            | 41    | <div><div></div></div> | 0.9%  |
| 97                                                                                                                                                          | No answer                                                                                                                                                | 37    | <div><div></div></div> | 0.8%  |
| 98                                                                                                                                                          | Not asked                                                                                                                                                | 3505  | <div><div></div></div> | 74.7% |
| Warning: these figures indicate the number of cases found in the data file. They cannot be interpreted as summary statistics of the population of interest. |                                                                                                                                                          |       |                        |       |
| # r7fri4k: Likelihood of participation in search and rescue operation: Asked by family/someone you know                                                     |                                                                                                                                                          |       |                        |       |
| Information                                                                                                                                                 | [Type= discrete] [Format=numeric] [Range= 1-5] [Missing=*]                                                                                               |       |                        |       |
| Statistics [NW/ W]                                                                                                                                          | [Valid=4689 /-] [Invalid=0 /-]                                                                                                                           |       |                        |       |
| Literal question                                                                                                                                            | If you were asked by your family or someone you know to participate in a search and rescue operation, how likely is it that you would have participated? |       |                        |       |
| Interviewer's instructions                                                                                                                                  | [Asked if u=1. ]                                                                                                                                         |       |                        |       |
| Notes                                                                                                                                                       | Dersom du ble bedt av familien din eller andre i din omgangskrets om å delta i et søk og redningsoppdrag, hvor sannsynl                                  |       |                        |       |
| Value                                                                                                                                                       | Label                                                                                                                                                    | Cases | Percentage             |       |
| 1                                                                                                                                                           | Very likely                                                                                                                                              | 851   | <div><div></div></div> | 18.1% |
| 2                                                                                                                                                           | Most likely                                                                                                                                              | 241   | <div><div></div></div> | 5.1%  |
| 3                                                                                                                                                           | Neither one way or the other                                                                                                                             | 21    | <div><div></div></div> | 0.4%  |
| 4                                                                                                                                                           | Most unlikely                                                                                                                                            | 22    | <div><div></div></div> | 0.5%  |
| 5                                                                                                                                                           | Very unlikely                                                                                                                                            | 16    | <div><div></div></div> | 0.3%  |
| 97                                                                                                                                                          | No answer                                                                                                                                                | 33    | <div><div></div></div> | 0.7%  |
| 98                                                                                                                                                          | Not asked                                                                                                                                                | 3505  | <div><div></div></div> | 74.7% |
| Warning: these figures indicate the number of cases found in the data file. They cannot be interpreted as summary statistics of the population of interest. |                                                                                                                                                          |       |                        |       |
| # r7fri4l_1: Statement: Voluntary organisation's role in emergency work gets little coverage by the media                                                   |                                                                                                                                                          |       |                        |       |
| Information                                                                                                                                                 | [Type= discrete] [Format=numeric] [Range= 1-5] [Missing=*]                                                                                               |       |                        |       |
| Statistics [NW/ W]                                                                                                                                          | [Valid=4689 /-] [Invalid=0 /-]                                                                                                                           |       |                        |       |

| # r7fri4l_1: Statement: Voluntary organisation's role in emergency work gets little coverage by the media                                                   |                                                                                                                                                             |       |            |
|-------------------------------------------------------------------------------------------------------------------------------------------------------------|-------------------------------------------------------------------------------------------------------------------------------------------------------------|-------|------------|
| Pre-question                                                                                                                                                | How much do you agree or disagree with the following statements:                                                                                            |       |            |
| Literal question                                                                                                                                            | The voluntary organisations' role in emergency work gets little coverage by the media.                                                                      |       |            |
| Interviewer's instructions                                                                                                                                  | [Asked if u=1. ]                                                                                                                                            |       |            |
| Notes                                                                                                                                                       | De frivillige organisasjonenes rolle i beredskapsarbeidet er lite synlig i media. (Hvor enig eller uenig er du i følgende)                                  |       |            |
| Value                                                                                                                                                       | Label                                                                                                                                                       | Cases | Percentage |
| 1                                                                                                                                                           | Completely agree                                                                                                                                            | 117   | 2.5%       |
| 2                                                                                                                                                           | Somewhat agree                                                                                                                                              | 429   | 9.1%       |
| 3                                                                                                                                                           | Neither agree nor disagree                                                                                                                                  | 305   | 6.5%       |
| 4                                                                                                                                                           | Somewhat disagree                                                                                                                                           | 268   | 5.7%       |
| 5                                                                                                                                                           | Completely agree                                                                                                                                            | 39    | 0.8%       |
| 97                                                                                                                                                          | No answer                                                                                                                                                   | 26    | 0.6%       |
| 98                                                                                                                                                          | Not asked                                                                                                                                                   | 3505  | 74.7%      |
| Warning: these figures indicate the number of cases found in the data file. They cannot be interpreted as summary statistics of the population of interest. |                                                                                                                                                             |       |            |
| # r7fri4l_2: Statement: Important to my participation in rescue work that I personally know the leader/members                                              |                                                                                                                                                             |       |            |
| Information                                                                                                                                                 | [Type= discrete] [Format=numeric] [Range= 1-5] [Missing=*]                                                                                                  |       |            |
| Statistics [NW/ W]                                                                                                                                          | [Valid=4689 /-] [Invalid=0 /-]                                                                                                                              |       |            |
| Pre-question                                                                                                                                                | How much do you agree or disagree with the following statements:                                                                                            |       |            |
| Literal question                                                                                                                                            | If I am to participate as a volunteer in rescue work it is important to me that I know the leader or other members of the organisation on a personal basis. |       |            |
| Interviewer's instructions                                                                                                                                  | [Asked if u=1. ]                                                                                                                                            |       |            |
| Notes                                                                                                                                                       | Hvis jeg skal delta som frivillig i redningsarbeid er det viktig at jeg kjenner ledere eller andre medlemmer av organisas                                   |       |            |
| Value                                                                                                                                                       | Label                                                                                                                                                       | Cases | Percentage |
| 1                                                                                                                                                           | Completely agree                                                                                                                                            | 41    | 0.9%       |
| 2                                                                                                                                                           | Somewhat agree                                                                                                                                              | 224   | 4.8%       |
| 3                                                                                                                                                           | Neither agree nor disagree                                                                                                                                  | 400   | 8.5%       |
| 4                                                                                                                                                           | Somewhat disagree                                                                                                                                           | 324   | 6.9%       |
| 5                                                                                                                                                           | Completely agree                                                                                                                                            | 164   | 3.5%       |
| 97                                                                                                                                                          | No answer                                                                                                                                                   | 31    | 0.7%       |
| 98                                                                                                                                                          | Not asked                                                                                                                                                   | 3505  | 74.7%      |
| Warning: these figures indicate the number of cases found in the data file. They cannot be interpreted as summary statistics of the population of interest. |                                                                                                                                                             |       |            |
| # r7fri4l_3: Statement: Emergency response work public responsibility limited to public institutions                                                        |                                                                                                                                                             |       |            |
| Information                                                                                                                                                 | [Type= discrete] [Format=numeric] [Range= 1-5] [Missing=*]                                                                                                  |       |            |
| Statistics [NW/ W]                                                                                                                                          | [Valid=4689 /-] [Invalid=0 /-]                                                                                                                              |       |            |
| Pre-question                                                                                                                                                | How much do you agree or disagree with the following statements:                                                                                            |       |            |
| Literal question                                                                                                                                            | Emergency response work should be the responsibility of the public authorities and limited to public institutions.                                          |       |            |
| Interviewer's instructions                                                                                                                                  | [Asked if u=1. ]                                                                                                                                            |       |            |
| Notes                                                                                                                                                       | Beredskapsarbeid bør være et offentlig ansvar forbeholdt offentlige institusjoner. (Hvor enig eller uenig er du i følg                                      |       |            |
| Value                                                                                                                                                       | Label                                                                                                                                                       | Cases | Percentage |
| 1                                                                                                                                                           | Completely agree                                                                                                                                            | 64    | 1.4%       |
| 2                                                                                                                                                           | Somewhat agree                                                                                                                                              | 189   | 4.0%       |
| 3                                                                                                                                                           | Neither agree nor disagree                                                                                                                                  | 424   | 9.0%       |
| 4                                                                                                                                                           | Somewhat disagree                                                                                                                                           | 376   | 8.0%       |
| 5                                                                                                                                                           | Completely agree                                                                                                                                            | 102   | 2.2%       |

| # r7fri4l_3: Statement: Emergency response work public responsibility limited to public institutions                                                        |                                                                                                                            |       |            |
|-------------------------------------------------------------------------------------------------------------------------------------------------------------|----------------------------------------------------------------------------------------------------------------------------|-------|------------|
| Value                                                                                                                                                       | Label                                                                                                                      | Cases | Percentage |
| 97                                                                                                                                                          | No answer                                                                                                                  | 29    | 0.6%       |
| 98                                                                                                                                                          | Not asked                                                                                                                  | 3505  | 74.7%      |
| Warning: these figures indicate the number of cases found in the data file. They cannot be interpreted as summary statistics of the population of interest. |                                                                                                                            |       |            |
| # r7fri4l_4: Statement: Voluntary organisations should have an important role in emergency response work                                                    |                                                                                                                            |       |            |
| Information                                                                                                                                                 | [Type= discrete] [Format=numeric] [Range= 1-5] [Missing=*]                                                                 |       |            |
| Statistics [NW/ W]                                                                                                                                          | [Valid=4689 /-] [Invalid=0 /-]                                                                                             |       |            |
| Pre-question                                                                                                                                                | How much do you agree or disagree with the following statements:                                                           |       |            |
| Literal question                                                                                                                                            | Voluntary organisations should have an important role in emergency response work in Norway.                                |       |            |
| Interviewer's instructions                                                                                                                                  | [Asked if u=1. ]                                                                                                           |       |            |
| Notes                                                                                                                                                       | Frivillige organisasjoner bør ha en viktig rolle i beredskapsarbeidet i Norge. (Hvor enig eller uenig er du i følgende     |       |            |
| Value                                                                                                                                                       | Label                                                                                                                      | Cases | Percentage |
| 1                                                                                                                                                           | Completely agree                                                                                                           | 251   | 5.4%       |
| 2                                                                                                                                                           | Somewhat agree                                                                                                             | 569   | 12.1%      |
| 3                                                                                                                                                           | Neither agree nor disagree                                                                                                 | 270   | 5.8%       |
| 4                                                                                                                                                           | Somewhat disagree                                                                                                          | 50    | 1.1%       |
| 5                                                                                                                                                           | Completely agree                                                                                                           | 14    | 0.3%       |
| 97                                                                                                                                                          | No answer                                                                                                                  | 30    | 0.6%       |
| 98                                                                                                                                                          | Not asked                                                                                                                  | 3505  | 74.7%      |
| Warning: these figures indicate the number of cases found in the data file. They cannot be interpreted as summary statistics of the population of interest. |                                                                                                                            |       |            |
| # r7fri4l_5: Statement: Essential for my participation as a volunteer that employer provides paid leave                                                     |                                                                                                                            |       |            |
| Information                                                                                                                                                 | [Type= discrete] [Format=numeric] [Range= 1-5] [Missing=*]                                                                 |       |            |
| Statistics [NW/ W]                                                                                                                                          | [Valid=4689 /-] [Invalid=0 /-]                                                                                             |       |            |
| Pre-question                                                                                                                                                | How much do you agree or disagree with the following statements:                                                           |       |            |
| Literal question                                                                                                                                            | If I should participate in voluntary rescue work it is essential that the employer provides paid leave during assignments. |       |            |
| Interviewer's instructions                                                                                                                                  | [Asked if u=1. ]                                                                                                           |       |            |
| Notes                                                                                                                                                       | Hvis jeg skal delta i frivillig redningsarbeid er det avgjørende at arbeidsgiver gir meg fri med lønn under oppdrag. (H    |       |            |
| Value                                                                                                                                                       | Label                                                                                                                      | Cases | Percentage |
| 1                                                                                                                                                           | Completely agree                                                                                                           | 177   | 3.8%       |
| 2                                                                                                                                                           | Somewhat agree                                                                                                             | 285   | 6.1%       |
| 3                                                                                                                                                           | Neither agree nor disagree                                                                                                 | 417   | 8.9%       |
| 4                                                                                                                                                           | Somewhat disagree                                                                                                          | 146   | 3.1%       |
| 5                                                                                                                                                           | Completely agree                                                                                                           | 113   | 2.4%       |
| 97                                                                                                                                                          | No answer                                                                                                                  | 46    | 1.0%       |
| 98                                                                                                                                                          | Not asked                                                                                                                  | 3505  | 74.7%      |
| Warning: these figures indicate the number of cases found in the data file. They cannot be interpreted as summary statistics of the population of interest. |                                                                                                                            |       |            |
| # r7fri11: How good is your health?                                                                                                                         |                                                                                                                            |       |            |
| Information                                                                                                                                                 | [Type= discrete] [Format=numeric] [Range= 1-4] [Missing=*]                                                                 |       |            |
| Statistics [NW/ W]                                                                                                                                          | [Valid=4689 /-] [Invalid=0 /-]                                                                                             |       |            |
| Literal question                                                                                                                                            | Generally speaking, how good is your health?                                                                               |       |            |
| Interviewer's instructions                                                                                                                                  | [Asked if u=1. ]                                                                                                           |       |            |



| <b># r7fri11: How good is your health?</b>                                                                                                                  |                                                                                                                                          |       |                        |       |
|-------------------------------------------------------------------------------------------------------------------------------------------------------------|------------------------------------------------------------------------------------------------------------------------------------------|-------|------------------------|-------|
| Value                                                                                                                                                       | Label                                                                                                                                    | Cases | Percentage             |       |
| 1                                                                                                                                                           | Very good                                                                                                                                | 322   | <div><div></div></div> | 6.9%  |
| 2                                                                                                                                                           | Good                                                                                                                                     | 673   | <div><div></div></div> | 14.4% |
| 3                                                                                                                                                           | Not very good                                                                                                                            | 152   | <div><div></div></div> | 3.2%  |
| 4                                                                                                                                                           | Bad                                                                                                                                      | 15    | <div><div></div></div> | 0.3%  |
| 97                                                                                                                                                          | No answer                                                                                                                                | 22    | <div><div></div></div> | 0.5%  |
| 98                                                                                                                                                          | Not asked                                                                                                                                | 3505  | <div><div></div></div> | 74.7% |
| Warning: these figures indicate the number of cases found in the data file. They cannot be interpreted as summary statistics of the population of interest. |                                                                                                                                          |       |                        |       |
| <b># r7fri12: Do you suffer from health problems expected to last for at least six months?</b>                                                              |                                                                                                                                          |       |                        |       |
| Information                                                                                                                                                 | [Type= discrete] [Format=numeric] [Range= 1-3] [Missing=*]                                                                               |       |                        |       |
| Statistics [NW/ W]                                                                                                                                          | [Valid=4689 /-] [Invalid=0 /-]                                                                                                           |       |                        |       |
| Literal question                                                                                                                                            | Do you suffer from any chronic illnesses or health problems that are expected to last for at least six months or more?                   |       |                        |       |
| Interviewer's instructions                                                                                                                                  | [Asked if u=1. ]                                                                                                                         |       |                        |       |
| Notes                                                                                                                                                       | Har du noen former for kronisk sykdom eller helseproblem som er forventet å vedvare minst seks måneder eller lengre?                     |       |                        |       |
| Value                                                                                                                                                       | Label                                                                                                                                    | Cases | Percentage             |       |
| 1                                                                                                                                                           | Yes                                                                                                                                      | 488   | <div><div></div></div> | 10.4% |
| 2                                                                                                                                                           | No                                                                                                                                       | 617   | <div><div></div></div> | 13.2% |
| 3                                                                                                                                                           | Do not wish to reply                                                                                                                     | 49    | <div><div></div></div> | 1.0%  |
| 97                                                                                                                                                          | No answer                                                                                                                                | 30    | <div><div></div></div> | 0.6%  |
| 98                                                                                                                                                          | Not asked                                                                                                                                | 3505  | <div><div></div></div> | 74.7% |
| Warning: these figures indicate the number of cases found in the data file. They cannot be interpreted as summary statistics of the population of interest. |                                                                                                                                          |       |                        |       |
| <b># r7fri13: Has, due to health problems, been prevented from undertaking usual activities during the last six months</b>                                  |                                                                                                                                          |       |                        |       |
| Information                                                                                                                                                 | [Type= discrete] [Format=numeric] [Range= 1-3] [Missing=*]                                                                               |       |                        |       |
| Statistics [NW/ W]                                                                                                                                          | [Valid=4689 /-] [Invalid=0 /-]                                                                                                           |       |                        |       |
| Literal question                                                                                                                                            | During the last six months have you been prevented due to health problems from undertaking any activities that people usually carry out? |       |                        |       |
| Interviewer's instructions                                                                                                                                  | [Asked if u=1. ]                                                                                                                         |       |                        |       |
| Notes                                                                                                                                                       | I løpet av de seks siste månedene, har du på grunn av helseproblemer vært hindret fra å utføre aktiviteter som folk                      |       |                        |       |
| Value                                                                                                                                                       | Label                                                                                                                                    | Cases | Percentage             |       |
| 1                                                                                                                                                           | Yes, very much prevented                                                                                                                 | 59    | <div><div></div></div> | 1.3%  |
| 2                                                                                                                                                           | Yes, prevented                                                                                                                           | 303   | <div><div></div></div> | 6.5%  |
| 3                                                                                                                                                           | No, not prevented                                                                                                                        | 797   | <div><div></div></div> | 17.0% |
| 97                                                                                                                                                          | No answer                                                                                                                                | 25    | <div><div></div></div> | 0.5%  |
| 98                                                                                                                                                          | Not asked                                                                                                                                | 3505  | <div><div></div></div> | 74.7% |
| Warning: these figures indicate the number of cases found in the data file. They cannot be interpreted as summary statistics of the population of interest. |                                                                                                                                          |       |                        |       |
| <b># r7fri32: Extent of satisfaction with life at the moment</b>                                                                                            |                                                                                                                                          |       |                        |       |
| Information                                                                                                                                                 | [Type= discrete] [Format=numeric] [Range= 1-5] [Missing=*]                                                                               |       |                        |       |
| Statistics [NW/ W]                                                                                                                                          | [Valid=4689 /-] [Invalid=0 /-]                                                                                                           |       |                        |       |
| Literal question                                                                                                                                            | To what extent are you satisfied with life at the moment?                                                                                |       |                        |       |
| Interviewer's instructions                                                                                                                                  | [Asked if u=1. ]                                                                                                                         |       |                        |       |
| Value                                                                                                                                                       | Label                                                                                                                                    | Cases | Percentage             |       |
| 1                                                                                                                                                           | Extremely satisfied                                                                                                                      | 205   | <div><div></div></div> | 4.4%  |
| 2                                                                                                                                                           | Very satisfied                                                                                                                           | 660   | <div><div></div></div> | 14.1% |

| # r7fri32: Extent of satisfaction with life at the moment                                                                                                   |                                                                                        |       |                        |       |
|-------------------------------------------------------------------------------------------------------------------------------------------------------------|----------------------------------------------------------------------------------------|-------|------------------------|-------|
| Value                                                                                                                                                       | Label                                                                                  | Cases | Percentage             |       |
| 3                                                                                                                                                           | Somewhat                                                                               | 260   | <div><div></div></div> | 5.5%  |
| 4                                                                                                                                                           | Slightly                                                                               | 31    | <div><div></div></div> | 0.7%  |
| 5                                                                                                                                                           | Not at all                                                                             | 7     | <div><div></div></div> | 0.1%  |
| 97                                                                                                                                                          | No answer                                                                              | 21    | <div><div></div></div> | 0.4%  |
| 98                                                                                                                                                          | Not asked                                                                              | 3505  | <div><div></div></div> | 74.7% |
| Warning: these figures indicate the number of cases found in the data file. They cannot be interpreted as summary statistics of the population of interest. |                                                                                        |       |                        |       |
| # r7fri33: To what extent do you think that what you are doing in life is meaningful?                                                                       |                                                                                        |       |                        |       |
| Information                                                                                                                                                 | [Type= discrete] [Format=numeric] [Range= 1-5] [Missing=*]                             |       |                        |       |
| Statistics [NW/ W]                                                                                                                                          | [Valid=4689 /-] [Invalid=0 /-]                                                         |       |                        |       |
| Literal question                                                                                                                                            | All in all, to what extent do you think that what you are doing in life is meaningful? |       |                        |       |
| Interviewer's instructions                                                                                                                                  | [Asked if u=1. ]                                                                       |       |                        |       |
| Value                                                                                                                                                       | Label                                                                                  | Cases | Percentage             |       |
| 1                                                                                                                                                           | To a very great extent                                                                 | 219   | <div><div></div></div> | 4.7%  |
| 2                                                                                                                                                           | To a great extent                                                                      | 620   | <div><div></div></div> | 13.2% |
| 3                                                                                                                                                           | Somewhat                                                                               | 263   | <div><div></div></div> | 5.6%  |
| 4                                                                                                                                                           | To a small extent                                                                      | 46    | <div><div></div></div> | 1.0%  |
| 5                                                                                                                                                           | Not at all                                                                             | 8     | <div><div></div></div> | 0.2%  |
| 97                                                                                                                                                          | No answer                                                                              | 28    | <div><div></div></div> | 0.6%  |
| 98                                                                                                                                                          | Not asked                                                                              | 3505  | <div><div></div></div> | 74.7% |
| Warning: these figures indicate the number of cases found in the data file. They cannot be interpreted as summary statistics of the population of interest. |                                                                                        |       |                        |       |
| # r7fri36_1: How satisfied with: Your standard of living                                                                                                    |                                                                                        |       |                        |       |
| Information                                                                                                                                                 | [Type= discrete] [Format=numeric] [Range= 1-7] [Missing=*]                             |       |                        |       |
| Statistics [NW/ W]                                                                                                                                          | [Valid=4689 /-] [Invalid=0 /-]                                                         |       |                        |       |
| Pre-question                                                                                                                                                | How satisfied are you with ...                                                         |       |                        |       |
| Literal question                                                                                                                                            | Your standard of living                                                                |       |                        |       |
| Interviewer's instructions                                                                                                                                  | [Asked if u=1. ]                                                                       |       |                        |       |
| Value                                                                                                                                                       | Label                                                                                  | Cases | Percentage             |       |
| 1                                                                                                                                                           | Very satisfied                                                                         | 335   | <div><div></div></div> | 7.1%  |
| 2                                                                                                                                                           | Satisfied                                                                              | 659   | <div><div></div></div> | 14.1% |
| 3                                                                                                                                                           | Somewhat satisfied                                                                     | 128   | <div><div></div></div> | 2.7%  |
| 4                                                                                                                                                           | Not very satisfied                                                                     | 19    | <div><div></div></div> | 0.4%  |
| 5                                                                                                                                                           | Not satisfied                                                                          | 14    | <div><div></div></div> | 0.3%  |
| 6                                                                                                                                                           | Not satisfied at all                                                                   | 5     | <div><div></div></div> | 0.1%  |
| 97                                                                                                                                                          | No answer                                                                              | 24    | <div><div></div></div> | 0.5%  |
| 98                                                                                                                                                          | Not asked                                                                              | 3505  | <div><div></div></div> | 74.7% |
| Warning: these figures indicate the number of cases found in the data file. They cannot be interpreted as summary statistics of the population of interest. |                                                                                        |       |                        |       |
| # r7fri36_2: How satisfied with: Your health                                                                                                                |                                                                                        |       |                        |       |
| Information                                                                                                                                                 | [Type= discrete] [Format=numeric] [Range= 1-7] [Missing=*]                             |       |                        |       |
| Statistics [NW/ W]                                                                                                                                          | [Valid=4689 /-] [Invalid=0 /-]                                                         |       |                        |       |
| Pre-question                                                                                                                                                | How satisfied are you with ...                                                         |       |                        |       |
| Literal question                                                                                                                                            | Your health                                                                            |       |                        |       |
| Interviewer's instructions                                                                                                                                  | [Asked if u=1. ]                                                                       |       |                        |       |

| # r7fri36_2: How satisfied with: Your health                                                                                                                |                                                            |       |                              |
|-------------------------------------------------------------------------------------------------------------------------------------------------------------|------------------------------------------------------------|-------|------------------------------|
| Value                                                                                                                                                       | Label                                                      | Cases | Percentage                   |
| 1                                                                                                                                                           | Very satisfied                                             | 212   | <div><div></div></div> 4.5%  |
| 2                                                                                                                                                           | Satisfied                                                  | 572   | <div><div></div></div> 12.2% |
| 3                                                                                                                                                           | Somewhat satisfied                                         | 245   | <div><div></div></div> 5.2%  |
| 4                                                                                                                                                           | Not very satisfied                                         | 70    | <div><div></div></div> 1.5%  |
| 5                                                                                                                                                           | Not satisfied                                              | 35    | <div><div></div></div> 0.7%  |
| 6                                                                                                                                                           | Not satisfied at all                                       | 22    | <div><div></div></div> 0.5%  |
| 97                                                                                                                                                          | No answer                                                  | 28    | <div><div></div></div> 0.6%  |
| 98                                                                                                                                                          | Not asked                                                  | 3505  | <div><div></div></div> 74.7% |
| Warning: these figures indicate the number of cases found in the data file. They cannot be interpreted as summary statistics of the population of interest. |                                                            |       |                              |
| # r7fri36_3: How satisfied with: What you are achieving in life                                                                                             |                                                            |       |                              |
| Information                                                                                                                                                 | [Type= discrete] [Format=numeric] [Range= 1-7] [Missing=*] |       |                              |
| Statistics [NW/ W]                                                                                                                                          | [Valid=4689 /-] [Invalid=0 /-]                             |       |                              |
| Pre-question                                                                                                                                                | How satisfied are you with ...                             |       |                              |
| Literal question                                                                                                                                            | What you are achieving in life                             |       |                              |
| Interviewer's instructions                                                                                                                                  | [Asked if u=1. ]                                           |       |                              |
| Value                                                                                                                                                       | Label                                                      | Cases | Percentage                   |
| 1                                                                                                                                                           | Very satisfied                                             | 141   | <div><div></div></div> 3.0%  |
| 2                                                                                                                                                           | Satisfied                                                  | 627   | <div><div></div></div> 13.4% |
| 3                                                                                                                                                           | Somewhat satisfied                                         | 284   | <div><div></div></div> 6.1%  |
| 4                                                                                                                                                           | Not very satisfied                                         | 59    | <div><div></div></div> 1.3%  |
| 5                                                                                                                                                           | Not satisfied                                              | 26    | <div><div></div></div> 0.6%  |
| 6                                                                                                                                                           | Not satisfied at all                                       | 12    | <div><div></div></div> 0.3%  |
| 97                                                                                                                                                          | No answer                                                  | 35    | <div><div></div></div> 0.7%  |
| 98                                                                                                                                                          | Not asked                                                  | 3505  | <div><div></div></div> 74.7% |
| Warning: these figures indicate the number of cases found in the data file. They cannot be interpreted as summary statistics of the population of interest. |                                                            |       |                              |
| # r7fri36_4: How satisfied with: Personal relationships                                                                                                     |                                                            |       |                              |
| Information                                                                                                                                                 | [Type= discrete] [Format=numeric] [Range= 1-7] [Missing=*] |       |                              |
| Statistics [NW/ W]                                                                                                                                          | [Valid=4689 /-] [Invalid=0 /-]                             |       |                              |
| Pre-question                                                                                                                                                | How satisfied are you with ...                             |       |                              |
| Literal question                                                                                                                                            | Your personal relationships                                |       |                              |
| Interviewer's instructions                                                                                                                                  | [Asked if u=1. ]                                           |       |                              |
| Value                                                                                                                                                       | Label                                                      | Cases | Percentage                   |
| 1                                                                                                                                                           | Very satisfied                                             | 221   | <div><div></div></div> 4.7%  |
| 2                                                                                                                                                           | Satisfied                                                  | 624   | <div><div></div></div> 13.3% |
| 3                                                                                                                                                           | Somewhat satisfied                                         | 243   | <div><div></div></div> 5.2%  |
| 4                                                                                                                                                           | Not very satisfied                                         | 47    | <div><div></div></div> 1.0%  |
| 5                                                                                                                                                           | Not satisfied                                              | 15    | <div><div></div></div> 0.3%  |
| 6                                                                                                                                                           | Not satisfied at all                                       | 3     | <div><div></div></div> 0.1%  |
| 97                                                                                                                                                          | No answer                                                  | 31    | <div><div></div></div> 0.7%  |
| 98                                                                                                                                                          | Not asked                                                  | 3505  | <div><div></div></div> 74.7% |
| Warning: these figures indicate the number of cases found in the data file. They cannot be interpreted as summary statistics of the population of interest. |                                                            |       |                              |

| # r7fri36_5: How satisfied with: Feeling secure                                                                                                             |                                                            |       |                        |       |
|-------------------------------------------------------------------------------------------------------------------------------------------------------------|------------------------------------------------------------|-------|------------------------|-------|
| Information                                                                                                                                                 | [Type= discrete] [Format=numeric] [Range= 1-7] [Missing=*] |       |                        |       |
| Statistics [NW/ W]                                                                                                                                          | [Valid=4689 /-] [Invalid=0 /-]                             |       |                        |       |
| Pre-question                                                                                                                                                | How satisfied are you with ...                             |       |                        |       |
| Literal question                                                                                                                                            | How secure you feel                                        |       |                        |       |
| Interviewer's instructions                                                                                                                                  | [Asked if u=1. ]                                           |       |                        |       |
| Value                                                                                                                                                       | Label                                                      | Cases | Percentage             |       |
| 1                                                                                                                                                           | Very satisfied                                             | 336   | <div><div></div></div> | 7.2%  |
| 2                                                                                                                                                           | Satisfied                                                  | 638   | <div><div></div></div> | 13.6% |
| 3                                                                                                                                                           | Somewhat satisfied                                         | 135   | <div><div></div></div> | 2.9%  |
| 4                                                                                                                                                           | Not very satisfied                                         | 26    | <div><div></div></div> | 0.6%  |
| 5                                                                                                                                                           | Not satisfied                                              | 14    | <div><div></div></div> | 0.3%  |
| 6                                                                                                                                                           | Not satisfied at all                                       | 8     | <div><div></div></div> | 0.2%  |
| 97                                                                                                                                                          | No answer                                                  | 27    | <div><div></div></div> | 0.6%  |
| 98                                                                                                                                                          | Not asked                                                  | 3505  | <div><div></div></div> | 74.7% |
| Warning: these figures indicate the number of cases found in the data file. They cannot be interpreted as summary statistics of the population of interest. |                                                            |       |                        |       |
| # r7fri36_6: How satisfied with: The feeling of being part of a neighbourhood community                                                                     |                                                            |       |                        |       |
| Information                                                                                                                                                 | [Type= discrete] [Format=numeric] [Range= 1-7] [Missing=*] |       |                        |       |
| Statistics [NW/ W]                                                                                                                                          | [Valid=4689 /-] [Invalid=0 /-]                             |       |                        |       |
| Pre-question                                                                                                                                                | How satisfied are you with ...                             |       |                        |       |
| Literal question                                                                                                                                            | The feeling of being part of a neighbourhood community     |       |                        |       |
| Interviewer's instructions                                                                                                                                  | [Asked if u=1. ]                                           |       |                        |       |
| Value                                                                                                                                                       | Label                                                      | Cases | Percentage             |       |
| 1                                                                                                                                                           | Very satisfied                                             | 111   | <div><div></div></div> | 2.4%  |
| 2                                                                                                                                                           | Satisfied                                                  | 502   | <div><div></div></div> | 10.7% |
| 3                                                                                                                                                           | Somewhat satisfied                                         | 328   | <div><div></div></div> | 7.0%  |
| 4                                                                                                                                                           | Not very satisfied                                         | 122   | <div><div></div></div> | 2.6%  |
| 5                                                                                                                                                           | Not satisfied                                              | 33    | <div><div></div></div> | 0.7%  |
| 6                                                                                                                                                           | Not satisfied at all                                       | 25    | <div><div></div></div> | 0.5%  |
| 97                                                                                                                                                          | No answer                                                  | 63    | <div><div></div></div> | 1.3%  |
| 98                                                                                                                                                          | Not asked                                                  | 3505  | <div><div></div></div> | 74.7% |
| Warning: these figures indicate the number of cases found in the data file. They cannot be interpreted as summary statistics of the population of interest. |                                                            |       |                        |       |
| # r7fri36_7: How satisfied with: The prospects for security in the future                                                                                   |                                                            |       |                        |       |
| Information                                                                                                                                                 | [Type= discrete] [Format=numeric] [Range= 1-7] [Missing=*] |       |                        |       |
| Statistics [NW/ W]                                                                                                                                          | [Valid=4689 /-] [Invalid=0 /-]                             |       |                        |       |
| Pre-question                                                                                                                                                | How satisfied are you with ...                             |       |                        |       |
| Literal question                                                                                                                                            | The prospects for security in the future                   |       |                        |       |
| Interviewer's instructions                                                                                                                                  | [Asked if u=1. ]                                           |       |                        |       |
| Value                                                                                                                                                       | Label                                                      | Cases | Percentage             |       |
| 1                                                                                                                                                           | Very satisfied                                             | 159   | <div><div></div></div> | 3.4%  |
| 2                                                                                                                                                           | Satisfied                                                  | 588   | <div><div></div></div> | 12.5% |
| 3                                                                                                                                                           | Somewhat satisfied                                         | 281   | <div><div></div></div> | 6.0%  |
| 4                                                                                                                                                           | Not very satisfied                                         | 72    | <div><div></div></div> | 1.5%  |
| 5                                                                                                                                                           | Not satisfied                                              | 31    | <div><div></div></div> | 0.7%  |

| # r7fri36_7: How satisfied with: The prospects for security in the future                                                                                   |                                                                                     |       |            |
|-------------------------------------------------------------------------------------------------------------------------------------------------------------|-------------------------------------------------------------------------------------|-------|------------|
| Value                                                                                                                                                       | Label                                                                               | Cases | Percentage |
| 6                                                                                                                                                           | Not satisfied at all                                                                | 20    | 0.4%       |
| 97                                                                                                                                                          | No answer                                                                           | 33    | 0.7%       |
| 98                                                                                                                                                          | Not asked                                                                           | 3505  | 74.7%      |
| Warning: these figures indicate the number of cases found in the data file. They cannot be interpreted as summary statistics of the population of interest. |                                                                                     |       |            |
| # r7fri36_8: How satisfied with: The amount of time to do things you like doing                                                                             |                                                                                     |       |            |
| Information                                                                                                                                                 | [Type= discrete] [Format=numeric] [Range= 1-7] [Missing=*]                          |       |            |
| Statistics [NW/ W]                                                                                                                                          | [Valid=4689 /-] [Invalid=0 /-]                                                      |       |            |
| Pre-question                                                                                                                                                | How satisfied are you with ...                                                      |       |            |
| Literal question                                                                                                                                            | The amount of time you have to do the things you like doing                         |       |            |
| Interviewer's instructions                                                                                                                                  | [Asked if u=1. ]                                                                    |       |            |
| Notes                                                                                                                                                       | Mengden tid du har til å gjøre tingene du liker å gjøre (Hvor fornøyd er du med...) |       |            |
| Value                                                                                                                                                       | Label                                                                               | Cases | Percentage |
| 1                                                                                                                                                           | Very satisfied                                                                      | 147   | 3.1%       |
| 2                                                                                                                                                           | Satisfied                                                                           | 502   | 10.7%      |
| 3                                                                                                                                                           | Somewhat satisfied                                                                  | 297   | 6.3%       |
| 4                                                                                                                                                           | Not very satisfied                                                                  | 127   | 2.7%       |
| 5                                                                                                                                                           | Not satisfied                                                                       | 43    | 0.9%       |
| 6                                                                                                                                                           | Not satisfied at all                                                                | 38    | 0.8%       |
| 97                                                                                                                                                          | No answer                                                                           | 30    | 0.6%       |
| 98                                                                                                                                                          | Not asked                                                                           | 3505  | 74.7%      |
| Warning: these figures indicate the number of cases found in the data file. They cannot be interpreted as summary statistics of the population of interest. |                                                                                     |       |            |
| # r7fri36_9: How satisfied with: Quality of nature and the environment in local area                                                                        |                                                                                     |       |            |
| Information                                                                                                                                                 | [Type= discrete] [Format=numeric] [Range= 1-7] [Missing=*]                          |       |            |
| Statistics [NW/ W]                                                                                                                                          | [Valid=4689 /-] [Invalid=0 /-]                                                      |       |            |
| Pre-question                                                                                                                                                | How satisfied are you with ...                                                      |       |            |
| Literal question                                                                                                                                            | The quality of nature and the environment in your local area                        |       |            |
| Interviewer's instructions                                                                                                                                  | [Asked if u=1. ]                                                                    |       |            |
| Value                                                                                                                                                       | Label                                                                               | Cases | Percentage |
| 1                                                                                                                                                           | Very satisfied                                                                      | 454   | 9.7%       |
| 2                                                                                                                                                           | Satisfied                                                                           | 550   | 11.7%      |
| 3                                                                                                                                                           | Somewhat satisfied                                                                  | 116   | 2.5%       |
| 4                                                                                                                                                           | Not very satisfied                                                                  | 25    | 0.5%       |
| 5                                                                                                                                                           | Not satisfied                                                                       | 9     | 0.2%       |
| 6                                                                                                                                                           | Not satisfied at all                                                                | 1     | 0.0%       |
| 97                                                                                                                                                          | No answer                                                                           | 29    | 0.6%       |
| 98                                                                                                                                                          | Not asked                                                                           | 3505  | 74.7%      |
| Warning: these figures indicate the number of cases found in the data file. They cannot be interpreted as summary statistics of the population of interest. |                                                                                     |       |            |
| # r7fri36_10: How satisfied with: Your job                                                                                                                  |                                                                                     |       |            |
| Information                                                                                                                                                 | [Type= discrete] [Format=numeric] [Range= 1-7] [Missing=*]                          |       |            |
| Statistics [NW/ W]                                                                                                                                          | [Valid=4689 /-] [Invalid=0 /-]                                                      |       |            |
| Pre-question                                                                                                                                                | How satisfied are you with ...                                                      |       |            |
| Literal question                                                                                                                                            | Your job                                                                            |       |            |

| # r7fri36_10: How satisfied with: Your job                                                                                                                  |                                             |                                                                                                                           |                        |       |
|-------------------------------------------------------------------------------------------------------------------------------------------------------------|---------------------------------------------|---------------------------------------------------------------------------------------------------------------------------|------------------------|-------|
| <b>Interviewer's instructions</b>                                                                                                                           |                                             | [Asked if u=1. ]                                                                                                          |                        |       |
| Value                                                                                                                                                       | Label                                       | Cases                                                                                                                     | Percentage             |       |
| 1                                                                                                                                                           | Very satisfied                              | 176                                                                                                                       | <div><div></div></div> | 3.8%  |
| 2                                                                                                                                                           | Satisfied                                   | 429                                                                                                                       | <div><div></div></div> | 9.1%  |
| 3                                                                                                                                                           | Somewhat satisfied                          | 160                                                                                                                       | <div><div></div></div> | 3.4%  |
| 4                                                                                                                                                           | Not very satisfied                          | 40                                                                                                                        | <div><div></div></div> | 0.9%  |
| 5                                                                                                                                                           | Not satisfied                               | 22                                                                                                                        | <div><div></div></div> | 0.5%  |
| 6                                                                                                                                                           | Not satisfied at all                        | 18                                                                                                                        | <div><div></div></div> | 0.4%  |
| 7                                                                                                                                                           | Not relevant                                | 300                                                                                                                       | <div><div></div></div> | 6.4%  |
| 97                                                                                                                                                          | No answer                                   | 39                                                                                                                        | <div><div></div></div> | 0.8%  |
| 98                                                                                                                                                          | Not asked                                   | 3505                                                                                                                      | <div><div></div></div> | 74.7% |
| Warning: these figures indicate the number of cases found in the data file. They cannot be interpreted as summary statistics of the population of interest. |                                             |                                                                                                                           |                        |       |
| # r7friend: Amount of friends                                                                                                                               |                                             |                                                                                                                           |                        |       |
| <b>Information</b>                                                                                                                                          |                                             | [Type= discrete] [Format=numeric] [Range= 1-5] [Missing=*]                                                                |                        |       |
| <b>Statistics [NW/ W]</b>                                                                                                                                   |                                             | [Valid=4689 /-] [Invalid=0 /-]                                                                                            |                        |       |
| <b>Literal question</b>                                                                                                                                     |                                             | Approximately how many friends do you have at the moment?                                                                 |                        |       |
| <b>Post-question</b>                                                                                                                                        |                                             | These are people you can relax with, talk to about private topics or ask for help.                                        |                        |       |
| <b>Interviewer's instructions</b>                                                                                                                           |                                             | [Asked if u=1. ]                                                                                                          |                        |       |
| <b>Notes</b>                                                                                                                                                |                                             | Omtrent hvor mange venner har du for tiden? Dette er mennesker du kan slappe av med, snakke med om private tema, eller sp |                        |       |
| Value                                                                                                                                                       | Label                                       | Cases                                                                                                                     | Percentage             |       |
| 1                                                                                                                                                           | None                                        | 19                                                                                                                        | <div><div></div></div> | 0.4%  |
| 2                                                                                                                                                           | 1-2                                         | 157                                                                                                                       | <div><div></div></div> | 3.3%  |
| 3                                                                                                                                                           | 3-5                                         | 409                                                                                                                       | <div><div></div></div> | 8.7%  |
| 4                                                                                                                                                           | 6-10                                        | 350                                                                                                                       | <div><div></div></div> | 7.5%  |
| 5                                                                                                                                                           | More than 10                                | 224                                                                                                                       | <div><div></div></div> | 4.8%  |
| 97                                                                                                                                                          | No answer                                   | 25                                                                                                                        | <div><div></div></div> | 0.5%  |
| 98                                                                                                                                                          | Not asked                                   | 3505                                                                                                                      | <div><div></div></div> | 74.7% |
| Warning: these figures indicate the number of cases found in the data file. They cannot be interpreted as summary statistics of the population of interest. |                                             |                                                                                                                           |                        |       |
| # r7frnet_1: Are there any people you know personally who: Could help you find a job                                                                        |                                             |                                                                                                                           |                        |       |
| <b>Information</b>                                                                                                                                          |                                             | [Type= discrete] [Format=numeric] [Range= 1-1] [Missing=*]                                                                |                        |       |
| <b>Statistics [NW/ W]</b>                                                                                                                                   |                                             | [Valid=4689 /-] [Invalid=0 /-]                                                                                            |                        |       |
| <b>Pre-question</b>                                                                                                                                         |                                             | Among the people you know personally, are there any who ...<br>More than one answer possible                              |                        |       |
| <b>Literal question</b>                                                                                                                                     |                                             | Could help you to find a job, if necessary?                                                                               |                        |       |
| <b>Interviewer's instructions</b>                                                                                                                           |                                             | [Asked if u=1. ]                                                                                                          |                        |       |
| <b>Notes</b>                                                                                                                                                |                                             | Vil kunne hjelpe deg å finne en jobb, hvis det blir nødvendig? (Er det i omgangskretsen din personer som...)              |                        |       |
| Value                                                                                                                                                       | Label                                       | Cases                                                                                                                     | Percentage             |       |
| 0                                                                                                                                                           |                                             | 624                                                                                                                       | <div><div></div></div> | 13.3% |
| 1                                                                                                                                                           | Could help you to find a job, if necessary? | 538                                                                                                                       | <div><div></div></div> | 11.5% |
| 97                                                                                                                                                          | No answer                                   | 22                                                                                                                        | <div><div></div></div> | 0.5%  |
| 98                                                                                                                                                          | Not asked                                   | 3505                                                                                                                      | <div><div></div></div> | 74.7% |
| Warning: these figures indicate the number of cases found in the data file. They cannot be interpreted as summary statistics of the population of interest. |                                             |                                                                                                                           |                        |       |

| # r7frnet_2: Are there any people you know personally who: Could lend you a large amount of money                                                           |                                                                                                                         |       |             |       |
|-------------------------------------------------------------------------------------------------------------------------------------------------------------|-------------------------------------------------------------------------------------------------------------------------|-------|-------------|-------|
| Information                                                                                                                                                 | [Type= discrete] [Format=numeric] [Range= 1-1] [Missing=*]                                                              |       |             |       |
| Statistics [NW/ W]                                                                                                                                          | [Valid=4689 /-] [Invalid=0 /-]                                                                                          |       |             |       |
| Pre-question                                                                                                                                                | Among the people you know personally, are there any who ...<br>More than one answer possible                            |       |             |       |
| Literal question                                                                                                                                            | Could lend you a large amount of money (e.g. 20,000 kroner)?                                                            |       |             |       |
| Interviewer's instructions                                                                                                                                  | [Asked if u=1. ]                                                                                                        |       |             |       |
| Notes                                                                                                                                                       | Vil kunne låne deg et større pengebeløp (f.eks. 20 000 kroner)? (Er det i omgangskretsen din personer som...)           |       |             |       |
| Value                                                                                                                                                       | Label                                                                                                                   | Cases | Percentage  |       |
| 0                                                                                                                                                           |                                                                                                                         | 535   | <div></div> | 11.4% |
| 1                                                                                                                                                           | Could lend you a large amount of money (e.g. 20,000 kroner)?                                                            | 627   | <div></div> | 13.4% |
| 97                                                                                                                                                          | No answer                                                                                                               | 22    | <div></div> | 0.5%  |
| 98                                                                                                                                                          | Not asked                                                                                                               | 3505  | <div></div> | 74.7% |
| Warning: these figures indicate the number of cases found in the data file. They cannot be interpreted as summary statistics of the population of interest. |                                                                                                                         |       |             |       |
| # r7frnet_3: Are there any people you know personally who: Have a high position in business/public/politics                                                 |                                                                                                                         |       |             |       |
| Information                                                                                                                                                 | [Type= discrete] [Format=numeric] [Range= 1-1] [Missing=*]                                                              |       |             |       |
| Statistics [NW/ W]                                                                                                                                          | [Valid=4689 /-] [Invalid=0 /-]                                                                                          |       |             |       |
| Pre-question                                                                                                                                                | Among the people you know personally, are there any who ...<br>More than one answer possible                            |       |             |       |
| Literal question                                                                                                                                            | Have a high position in business, public administration or politics?                                                    |       |             |       |
| Interviewer's instructions                                                                                                                                  | [Asked if u=1. ]                                                                                                        |       |             |       |
| Notes                                                                                                                                                       | Sitter i en høy stilling i næringslivet, i offentlig administrasjon eller i politikken? (Er det i omgangskretsen din pe |       |             |       |
| Value                                                                                                                                                       | Label                                                                                                                   | Cases | Percentage  |       |
| 0                                                                                                                                                           |                                                                                                                         | 782   | <div></div> | 16.7% |
| 1                                                                                                                                                           | Have a high position in business, public administration or politics?                                                    | 380   | <div></div> | 8.1%  |
| 97                                                                                                                                                          | No answer                                                                                                               | 22    | <div></div> | 0.5%  |
| 98                                                                                                                                                          | Not asked                                                                                                               | 3505  | <div></div> | 74.7% |
| Warning: these figures indicate the number of cases found in the data file. They cannot be interpreted as summary statistics of the population of interest. |                                                                                                                         |       |             |       |
| # r7frnet_4: No such people among those I know personally                                                                                                   |                                                                                                                         |       |             |       |
| Information                                                                                                                                                 | [Type= discrete] [Format=numeric] [Range= 1-1] [Missing=*]                                                              |       |             |       |
| Statistics [NW/ W]                                                                                                                                          | [Valid=4689 /-] [Invalid=0 /-]                                                                                          |       |             |       |
| Pre-question                                                                                                                                                | Among the people you know personally, are there any who ...<br>More than one answer possible                            |       |             |       |
| Literal question                                                                                                                                            | There are no such people among the people I know personally                                                             |       |             |       |
| Interviewer's instructions                                                                                                                                  | [Asked if u=1. ]                                                                                                        |       |             |       |
| Notes                                                                                                                                                       | Jeg har ingen slike personer i min omgangskrets (Er det i omgangskretsen din personer som...)                           |       |             |       |
| Value                                                                                                                                                       | Label                                                                                                                   | Cases | Percentage  |       |
| 0                                                                                                                                                           |                                                                                                                         | 850   | <div></div> | 18.1% |
| 1                                                                                                                                                           | There are no such people among the people I know personally                                                             | 312   | <div></div> | 6.7%  |
| 97                                                                                                                                                          | No answer                                                                                                               | 22    | <div></div> | 0.5%  |
| 98                                                                                                                                                          | Not asked                                                                                                               | 3505  | <div></div> | 74.7% |
| Warning: these figures indicate the number of cases found in the data file. They cannot be interpreted as summary statistics of the population of interest. |                                                                                                                         |       |             |       |
| # r7fri5: How often do you travel and stay overnight at least one night?                                                                                    |                                                                                                                         |       |             |       |
| Information                                                                                                                                                 | [Type= discrete] [Format=numeric] [Range= 1-7] [Missing=*]                                                              |       |             |       |

| # r7fri5: How often do you travel and stay overnight at least one night?                                                                                    |                                                                                         |       |            |
|-------------------------------------------------------------------------------------------------------------------------------------------------------------|-----------------------------------------------------------------------------------------|-------|------------|
| Statistics [NW/ W]                                                                                                                                          | [Valid=4689 /-] [Invalid=0 /-]                                                          |       |            |
| Literal question                                                                                                                                            | In general, how often do you travel and stay overnight at least one night?              |       |            |
| Post-question                                                                                                                                               | Take into account business travel, holiday trips and week-end trips etc.                |       |            |
| Interviewer's instructions                                                                                                                                  | [Asked if u=1. ]                                                                        |       |            |
| Value                                                                                                                                                       | Label                                                                                   | Cases | Percentage |
| 1                                                                                                                                                           | Weekly                                                                                  | 34    | 0.7%       |
| 2                                                                                                                                                           | Monthly                                                                                 | 345   | 7.4%       |
| 3                                                                                                                                                           | At least once every half year                                                           | 551   | 11.8%      |
| 4                                                                                                                                                           | At least once a year                                                                    | 161   | 3.4%       |
| 5                                                                                                                                                           | Less often                                                                              | 47    | 1.0%       |
| 6                                                                                                                                                           | Never                                                                                   | 15    | 0.3%       |
| 7                                                                                                                                                           | Don't know                                                                              | 7     | 0.1%       |
| 97                                                                                                                                                          | No answer                                                                               | 24    | 0.5%       |
| 98                                                                                                                                                          | Not asked                                                                               | 3505  | 74.7%      |
| Warning: these figures indicate the number of cases found in the data file. They cannot be interpreted as summary statistics of the population of interest. |                                                                                         |       |            |
| # r7fri5b: Has been travelling continuously at least 3 weeks during the last year                                                                           |                                                                                         |       |            |
| Information                                                                                                                                                 | [Type= discrete] [Format=numeric] [Range= 1-3] [Missing=*]                              |       |            |
| Statistics [NW/ W]                                                                                                                                          | [Valid=4689 /-] [Invalid=0 /-]                                                          |       |            |
| Literal question                                                                                                                                            | Have you been travelling continuously for at least 3 weeks during the last year?        |       |            |
| Interviewer's instructions                                                                                                                                  | [Asked if u=1 and RANGE (R7FRI5,1,5). ]                                                 |       |            |
| Notes                                                                                                                                                       | Har du oppholdt deg på reise i minst 3 uker sammenhengende i løpet av det siste året?   |       |            |
| Value                                                                                                                                                       | Label                                                                                   | Cases | Percentage |
| 1                                                                                                                                                           | Yes                                                                                     | 318   | 6.8%       |
| 2                                                                                                                                                           | No                                                                                      | 817   | 17.4%      |
| 3                                                                                                                                                           | Don't know                                                                              | 3     | 0.1%       |
| 97                                                                                                                                                          | No answer                                                                               | 0     |            |
| 98                                                                                                                                                          | Not asked                                                                               | 3551  | 75.7%      |
| Warning: these figures indicate the number of cases found in the data file. They cannot be interpreted as summary statistics of the population of interest. |                                                                                         |       |            |
| # r7fri5c_1: Length of longest lasting travel last year                                                                                                     |                                                                                         |       |            |
| Information                                                                                                                                                 | [Type= continuous] [Format=numeric] [Missing=*]                                         |       |            |
| Statistics [NW/ W]                                                                                                                                          | [Valid=4689 /-] [Invalid=0 /-]                                                          |       |            |
| Literal question                                                                                                                                            | How long was the period of your longest lasting travel during the last year?            |       |            |
| Post-question                                                                                                                                               | Note number of weeks:                                                                   |       |            |
| Interviewer's instructions                                                                                                                                  | [Asked if u=1 and R7FRI5b=1. ]                                                          |       |            |
| Value                                                                                                                                                       | Label                                                                                   | Cases | Percentage |
| 97                                                                                                                                                          | No answer                                                                               | 4     | 0.1%       |
| 98                                                                                                                                                          | Not asked                                                                               | 4371  | 99.9%      |
| Warning: these figures indicate the number of cases found in the data file. They cannot be interpreted as summary statistics of the population of interest. |                                                                                         |       |            |
| # r7fri6: Time spent on hobbies and recreational activities a normal week                                                                                   |                                                                                         |       |            |
| Information                                                                                                                                                 | [Type= discrete] [Format=numeric] [Range= 1-6] [Missing=*]                              |       |            |
| Statistics [NW/ W]                                                                                                                                          | [Valid=4689 /-] [Invalid=0 /-]                                                          |       |            |
| Literal question                                                                                                                                            | How much time do you spend on hobbies and recreational activities during a normal week? |       |            |



| # r7fri6: Time spent on hobbies and recreational activities a normal week                                                                                          |                                                                                                                                                                                                          |                                                                                                                                                                                                          |                        |       |
|--------------------------------------------------------------------------------------------------------------------------------------------------------------------|----------------------------------------------------------------------------------------------------------------------------------------------------------------------------------------------------------|----------------------------------------------------------------------------------------------------------------------------------------------------------------------------------------------------------|------------------------|-------|
| <b>Post-question</b>                                                                                                                                               |                                                                                                                                                                                                          | For example participation in sporting activities, band, choir, outdoor activities, organisational meetings and gatherings. Take into account both organised and unorganised activities.                  |                        |       |
| <b>Interviewer's instructions</b>                                                                                                                                  |                                                                                                                                                                                                          | [Asked if u=1. ]                                                                                                                                                                                         |                        |       |
| Value                                                                                                                                                              | Label                                                                                                                                                                                                    | Cases                                                                                                                                                                                                    | Percentage             |       |
| 1                                                                                                                                                                  | More than 5 hours                                                                                                                                                                                        | 302                                                                                                                                                                                                      | <div><div></div></div> | 6.4%  |
| 2                                                                                                                                                                  | 2-5 hours                                                                                                                                                                                                | 385                                                                                                                                                                                                      | <div><div></div></div> | 8.2%  |
| 3                                                                                                                                                                  | 1-2 hours                                                                                                                                                                                                | 195                                                                                                                                                                                                      | <div><div></div></div> | 4.2%  |
| 4                                                                                                                                                                  | Less than 1 hour                                                                                                                                                                                         | 97                                                                                                                                                                                                       | <div><div></div></div> | 2.1%  |
| 5                                                                                                                                                                  | Do not participate in any hobby or recreational activities                                                                                                                                               | 150                                                                                                                                                                                                      | <div><div></div></div> | 3.2%  |
| 6                                                                                                                                                                  | Don't know                                                                                                                                                                                               | 32                                                                                                                                                                                                       | <div><div></div></div> | 0.7%  |
| 97                                                                                                                                                                 | No answer                                                                                                                                                                                                | 23                                                                                                                                                                                                       | <div><div></div></div> | 0.5%  |
| 98                                                                                                                                                                 | Not asked                                                                                                                                                                                                | 3505                                                                                                                                                                                                     | <div><div></div></div> | 74.7% |
| <i>Warning: these figures indicate the number of cases found in the data file. They cannot be interpreted as summary statistics of the population of interest.</i> |                                                                                                                                                                                                          |                                                                                                                                                                                                          |                        |       |
| # r7fri7_1: Assists: Relatives not living with you, neighbours/friends/colleagues                                                                                  |                                                                                                                                                                                                          |                                                                                                                                                                                                          |                        |       |
| <b>Information</b>                                                                                                                                                 |                                                                                                                                                                                                          | [Type= discrete] [Format=numeric] [Range= 1-1] [Missing=*]                                                                                                                                               |                        |       |
| <b>Statistics [NW/ W]</b>                                                                                                                                          |                                                                                                                                                                                                          | [Valid=4689 /-] [Invalid=0 /-]                                                                                                                                                                           |                        |       |
| <b>Pre-question</b>                                                                                                                                                |                                                                                                                                                                                                          | Do you on a regular basis assist any of the following?<br>More than one answer possible                                                                                                                  |                        |       |
| <b>Literal question</b>                                                                                                                                            |                                                                                                                                                                                                          | Relatives not living with you, neighbours, friends or colleagues (for example giving lifts, shopping, gardening, tidying and cleaning, supervision and attention, care or any other type of assistance). |                        |       |
| <b>Interviewer's instructions</b>                                                                                                                                  |                                                                                                                                                                                                          | [Asked if u=1. ]                                                                                                                                                                                         |                        |       |
| <b>Notes</b>                                                                                                                                                       |                                                                                                                                                                                                          | Slektninger du ikke bor sammen med, naboer, venner eller kolleger (f.eks. hjelp til skyss, matinnkjøp, hagearbeid, ryddi                                                                                 |                        |       |
| Value                                                                                                                                                              | Label                                                                                                                                                                                                    | Cases                                                                                                                                                                                                    | Percentage             |       |
| 0                                                                                                                                                                  |                                                                                                                                                                                                          | 627                                                                                                                                                                                                      | <div><div></div></div> | 13.4% |
| 1                                                                                                                                                                  | Relatives not living with you, neighbours, friends or colleagues (for example giving lifts, shopping, gardening, tidying and cleaning, supervision and attention, care or any other type of assistance). | 535                                                                                                                                                                                                      | <div><div></div></div> | 11.4% |
| 97                                                                                                                                                                 | No answer                                                                                                                                                                                                | 22                                                                                                                                                                                                       | <div><div></div></div> | 0.5%  |
| 98                                                                                                                                                                 | Not asked                                                                                                                                                                                                | 3505                                                                                                                                                                                                     | <div><div></div></div> | 74.7% |
| <i>Warning: these figures indicate the number of cases found in the data file. They cannot be interpreted as summary statistics of the population of interest.</i> |                                                                                                                                                                                                          |                                                                                                                                                                                                          |                        |       |
| # r7fri7_2: Assists: Someone in your home with special care requirements                                                                                           |                                                                                                                                                                                                          |                                                                                                                                                                                                          |                        |       |
| <b>Information</b>                                                                                                                                                 |                                                                                                                                                                                                          | [Type= discrete] [Format=numeric] [Range= 1-1] [Missing=*]                                                                                                                                               |                        |       |
| <b>Statistics [NW/ W]</b>                                                                                                                                          |                                                                                                                                                                                                          | [Valid=4689 /-] [Invalid=0 /-]                                                                                                                                                                           |                        |       |
| <b>Pre-question</b>                                                                                                                                                |                                                                                                                                                                                                          | Do you on a regular basis assist any of the following?<br>More than one answer possible                                                                                                                  |                        |       |
| <b>Literal question</b>                                                                                                                                            |                                                                                                                                                                                                          | Someone in your household that have special care requirements (for example assistance due to age, illness or disabilities).                                                                              |                        |       |
| <b>Interviewer's instructions</b>                                                                                                                                  |                                                                                                                                                                                                          | [Asked if u=1. ]                                                                                                                                                                                         |                        |       |
| <b>Notes</b>                                                                                                                                                       |                                                                                                                                                                                                          | Noen i din egen husholdning som har spesielle omsorgsbehov (f.eks. hjelp til eldre, syke og funksjonshemmede). (Gir du re                                                                                |                        |       |
| Value                                                                                                                                                              | Label                                                                                                                                                                                                    | Cases                                                                                                                                                                                                    | Percentage             |       |
| 0                                                                                                                                                                  |                                                                                                                                                                                                          | 1013                                                                                                                                                                                                     | <div><div></div></div> | 21.6% |
| 1                                                                                                                                                                  | Someone in your household that have special care requirements (for example assistance due to age, illness or disabilities).                                                                              | 149                                                                                                                                                                                                      | <div><div></div></div> | 3.2%  |
| 97                                                                                                                                                                 | No answer                                                                                                                                                                                                | 22                                                                                                                                                                                                       | <div><div></div></div> | 0.5%  |
| 98                                                                                                                                                                 | Not asked                                                                                                                                                                                                | 3505                                                                                                                                                                                                     | <div><div></div></div> | 74.7% |
| <i>Warning: these figures indicate the number of cases found in the data file. They cannot be interpreted as summary statistics of the population of interest.</i> |                                                                                                                                                                                                          |                                                                                                                                                                                                          |                        |       |

|                                                                                                                                                             |                                                                                         |       |                              |
|-------------------------------------------------------------------------------------------------------------------------------------------------------------|-----------------------------------------------------------------------------------------|-------|------------------------------|
| # r7fri7_3: Assists: No                                                                                                                                     |                                                                                         |       |                              |
| Information                                                                                                                                                 | [Type= discrete] [Format=numeric] [Range= 1-1] [Missing=*]                              |       |                              |
| Statistics [NW/ W]                                                                                                                                          | [Valid=4689 /-] [Invalid=0 /-]                                                          |       |                              |
| Pre-question                                                                                                                                                | Do you on a regular basis assist any of the following?<br>More than one answer possible |       |                              |
| Literal question                                                                                                                                            | No                                                                                      |       |                              |
| Interviewer's instructions                                                                                                                                  | [Asked if u=1. ]                                                                        |       |                              |
| Value                                                                                                                                                       | Label                                                                                   | Cases | Percentage                   |
| 0                                                                                                                                                           |                                                                                         | 660   | <div><div></div></div> 14.1% |
| 1                                                                                                                                                           | No                                                                                      | 502   | <div><div></div></div> 10.7% |
| 97                                                                                                                                                          | No answer                                                                               | 22    | <div><div></div></div> 0.5%  |
| 98                                                                                                                                                          | Not asked                                                                               | 3505  | <div><div></div></div> 74.7% |
| Warning: these figures indicate the number of cases found in the data file. They cannot be interpreted as summary statistics of the population of interest. |                                                                                         |       |                              |
| # r7fri7_4: Assists: Don't know                                                                                                                             |                                                                                         |       |                              |
| Information                                                                                                                                                 | [Type= discrete] [Format=numeric] [Range= 1-1] [Missing=*]                              |       |                              |
| Statistics [NW/ W]                                                                                                                                          | [Valid=4689 /-] [Invalid=0 /-]                                                          |       |                              |
| Pre-question                                                                                                                                                | Do you on a regular basis assist any of the following?<br>More than one answer possible |       |                              |
| Literal question                                                                                                                                            | Don't know                                                                              |       |                              |
| Interviewer's instructions                                                                                                                                  | [Asked if u=1. ]                                                                        |       |                              |
| Value                                                                                                                                                       | Label                                                                                   | Cases | Percentage                   |
| 0                                                                                                                                                           |                                                                                         | 1120  | <div><div></div></div> 23.9% |
| 1                                                                                                                                                           | Don't know                                                                              | 42    | <div><div></div></div> 0.9%  |
| 97                                                                                                                                                          | No answer                                                                               | 22    | <div><div></div></div> 0.5%  |
| 98                                                                                                                                                          | Not asked                                                                               | 3505  | <div><div></div></div> 74.7% |
| Warning: these figures indicate the number of cases found in the data file. They cannot be interpreted as summary statistics of the population of interest. |                                                                                         |       |                              |
| # r7fri7b_1: Provides type of assistance: Visits                                                                                                            |                                                                                         |       |                              |
| Information                                                                                                                                                 | [Type= discrete] [Format=numeric] [Range= 1-1] [Missing=*]                              |       |                              |
| Statistics [NW/ W]                                                                                                                                          | [Valid=4689 /-] [Invalid=0 /-]                                                          |       |                              |
| Pre-question                                                                                                                                                | What type of assistance do you provide?<br>More than one answer possible                |       |                              |
| Literal question                                                                                                                                            | Visits, contact                                                                         |       |                              |
| Interviewer's instructions                                                                                                                                  | [Asked if u=1, R7FRI7_1=1 OR R7FRI7_2=1. ]                                              |       |                              |
| Value                                                                                                                                                       | Label                                                                                   | Cases | Percentage                   |
| 0                                                                                                                                                           |                                                                                         | 222   | <div><div></div></div> 4.7%  |
| 1                                                                                                                                                           | Visits, contact                                                                         | 389   | <div><div></div></div> 8.3%  |
| 97                                                                                                                                                          | No answer                                                                               | 0     |                              |
| 98                                                                                                                                                          | Not asked                                                                               | 4078  | <div><div></div></div> 87.0% |
| Warning: these figures indicate the number of cases found in the data file. They cannot be interpreted as summary statistics of the population of interest. |                                                                                         |       |                              |
| # r7fri7b_2: Provides type of assistance: Supervision                                                                                                       |                                                                                         |       |                              |
| Information                                                                                                                                                 | [Type= discrete] [Format=numeric] [Range= 1-1] [Missing=*]                              |       |                              |
| Statistics [NW/ W]                                                                                                                                          | [Valid=4689 /-] [Invalid=0 /-]                                                          |       |                              |
| Pre-question                                                                                                                                                | What type of assistance do you provide?<br>More than one answer possible                |       |                              |

| # r7fri7b_2: Provides type of assistance: Supervision                                                                                                       |                                                                                                                   |                                                                                                                   |                        |       |
|-------------------------------------------------------------------------------------------------------------------------------------------------------------|-------------------------------------------------------------------------------------------------------------------|-------------------------------------------------------------------------------------------------------------------|------------------------|-------|
| <b>Literal question</b>                                                                                                                                     |                                                                                                                   | Supervision or attention (for example, looking after children, regular telephone calls, other types of attention) |                        |       |
| <b>Interviewer's instructions</b>                                                                                                                           |                                                                                                                   | [Asked if u=1, R7FRI7_1=1 OR R7FRI7_2=1. ]                                                                        |                        |       |
| <b>Notes</b>                                                                                                                                                |                                                                                                                   | Pass eller tilsyn (f.eks. barnepass, regelmessig telefonkontakt, annet pass) (Hvilken type hjelp utfører du?)     |                        |       |
| Value                                                                                                                                                       | Label                                                                                                             | Cases                                                                                                             | Percentage             |       |
| 0                                                                                                                                                           |                                                                                                                   | 329                                                                                                               | <div><div></div></div> | 7.0%  |
| 1                                                                                                                                                           | Supervision or attention (for example, looking after children, regular telephone calls, other types of attention) | 282                                                                                                               | <div><div></div></div> | 6.0%  |
| 97                                                                                                                                                          | No answer                                                                                                         | 0                                                                                                                 |                        |       |
| 98                                                                                                                                                          | Not asked                                                                                                         | 4078                                                                                                              | <div><div></div></div> | 87.0% |
| Warning: these figures indicate the number of cases found in the data file. They cannot be interpreted as summary statistics of the population of interest. |                                                                                                                   |                                                                                                                   |                        |       |
| # r7fri7b_3: Provides type of assistance: Personal care                                                                                                     |                                                                                                                   |                                                                                                                   |                        |       |
| <b>Information</b>                                                                                                                                          |                                                                                                                   | [Type= discrete] [Format=numeric] [Range= 1-1] [Missing=*]                                                        |                        |       |
| <b>Statistics [NW/ W]</b>                                                                                                                                   |                                                                                                                   | [Valid=4689 /-] [Invalid=0 /-]                                                                                    |                        |       |
| <b>Pre-question</b>                                                                                                                                         |                                                                                                                   | What type of assistance do you provide?<br>More than one answer possible                                          |                        |       |
| <b>Literal question</b>                                                                                                                                     |                                                                                                                   | Personal care (for example hygiene, assistance with medicines, mobility)                                          |                        |       |
| <b>Interviewer's instructions</b>                                                                                                                           |                                                                                                                   | [Asked if u=1, R7FRI7_1=1 OR R7FRI7_2=1. ]                                                                        |                        |       |
| <b>Notes</b>                                                                                                                                                |                                                                                                                   | Personlig omsorg (f.eks. hygiene, hjelp til medisiner, forflytning) (Hvilken type hjelp utfører du?)              |                        |       |
| Value                                                                                                                                                       | Label                                                                                                             | Cases                                                                                                             | Percentage             |       |
| 0                                                                                                                                                           |                                                                                                                   | 539                                                                                                               | <div><div></div></div> | 11.5% |
| 1                                                                                                                                                           | Personal care (for example hygiene, assistance with medicines, mobility)                                          | 72                                                                                                                | <div><div></div></div> | 1.5%  |
| 97                                                                                                                                                          | No answer                                                                                                         | 0                                                                                                                 |                        |       |
| 98                                                                                                                                                          | Not asked                                                                                                         | 4078                                                                                                              | <div><div></div></div> | 87.0% |
| Warning: these figures indicate the number of cases found in the data file. They cannot be interpreted as summary statistics of the population of interest. |                                                                                                                   |                                                                                                                   |                        |       |
| # r7fri7b_4: Provides type of assistance: Housework                                                                                                         |                                                                                                                   |                                                                                                                   |                        |       |
| <b>Information</b>                                                                                                                                          |                                                                                                                   | [Type= discrete] [Format=numeric] [Range= 1-1] [Missing=*]                                                        |                        |       |
| <b>Statistics [NW/ W]</b>                                                                                                                                   |                                                                                                                   | [Valid=4689 /-] [Invalid=0 /-]                                                                                    |                        |       |
| <b>Pre-question</b>                                                                                                                                         |                                                                                                                   | What type of assistance do you provide?<br>More than one answer possible                                          |                        |       |
| <b>Literal question</b>                                                                                                                                     |                                                                                                                   | Housework (for example, washing, cooking, shopping for food)                                                      |                        |       |
| <b>Interviewer's instructions</b>                                                                                                                           |                                                                                                                   | [Asked if u=1, R7FRI7_1=1 OR R7FRI7_2=1. ]                                                                        |                        |       |
| Value                                                                                                                                                       | Label                                                                                                             | Cases                                                                                                             | Percentage             |       |
| 0                                                                                                                                                           |                                                                                                                   | 449                                                                                                               | <div><div></div></div> | 9.6%  |
| 1                                                                                                                                                           | Housework (for example, washing, cooking, shopping for food)                                                      | 162                                                                                                               | <div><div></div></div> | 3.5%  |
| 97                                                                                                                                                          | No answer                                                                                                         | 0                                                                                                                 |                        |       |
| 98                                                                                                                                                          | Not asked                                                                                                         | 4078                                                                                                              | <div><div></div></div> | 87.0% |
| Warning: these figures indicate the number of cases found in the data file. They cannot be interpreted as summary statistics of the population of interest. |                                                                                                                   |                                                                                                                   |                        |       |
| # r7fri7b_5: Provides type of assistance: Administrative                                                                                                    |                                                                                                                   |                                                                                                                   |                        |       |
| <b>Information</b>                                                                                                                                          |                                                                                                                   | [Type= discrete] [Format=numeric] [Range= 1-1] [Missing=*]                                                        |                        |       |
| <b>Statistics [NW/ W]</b>                                                                                                                                   |                                                                                                                   | [Valid=4689 /-] [Invalid=0 /-]                                                                                    |                        |       |
| <b>Pre-question</b>                                                                                                                                         |                                                                                                                   | What type of assistance do you provide?<br>More than one answer possible                                          |                        |       |
| <b>Literal question</b>                                                                                                                                     |                                                                                                                   | Administrative tasks (for example contact authorities, health care or banking)                                    |                        |       |

| # r7fri7b_5: Provides type of assistance: Administrative                                                                                                           |                                                                                             |                                                                                                                  |                              |
|--------------------------------------------------------------------------------------------------------------------------------------------------------------------|---------------------------------------------------------------------------------------------|------------------------------------------------------------------------------------------------------------------|------------------------------|
| <b>Interviewer's instructions</b>                                                                                                                                  |                                                                                             | [Asked if u=1, R7FRI7_1=1 OR R7FRI7_2=1. ]                                                                       |                              |
| <b>Notes</b>                                                                                                                                                       |                                                                                             | Administrative oppgaver (f.eks. kontakt med myndigheter, helsehjelp eller bank) (Hvilken type hjelp utfører du?) |                              |
| Value                                                                                                                                                              | Label                                                                                       | Cases                                                                                                            | Percentage                   |
| 0                                                                                                                                                                  |                                                                                             | 447                                                                                                              | <div><div></div></div> 9.5%  |
| 1                                                                                                                                                                  | Administrative tasks (for example contact authorities, health care or banking)              | 164                                                                                                              | <div><div></div></div> 3.5%  |
| 97                                                                                                                                                                 | No answer                                                                                   | 0                                                                                                                |                              |
| 98                                                                                                                                                                 | Not asked                                                                                   | 4078                                                                                                             | <div><div></div></div> 87.0% |
| <i>Warning: these figures indicate the number of cases found in the data file. They cannot be interpreted as summary statistics of the population of interest.</i> |                                                                                             |                                                                                                                  |                              |
| # r7fri7b_6: Provides type of assistance: Transport                                                                                                                |                                                                                             |                                                                                                                  |                              |
| <b>Information</b>                                                                                                                                                 |                                                                                             | [Type= discrete] [Format=numeric] [Range= 1-1] [Missing=*]                                                       |                              |
| <b>Statistics [NW/ W]</b>                                                                                                                                          |                                                                                             | [Valid=4689 /-] [Invalid=0 /-]                                                                                   |                              |
| <b>Pre-question</b>                                                                                                                                                |                                                                                             | What type of assistance do you provide?<br>More than one answer possible                                         |                              |
| <b>Literal question</b>                                                                                                                                            |                                                                                             | Transport (for example giving lifts in your car, collect/deliver to kindergarten/to school)                      |                              |
| <b>Interviewer's instructions</b>                                                                                                                                  |                                                                                             | [Asked if u=1, R7FRI7_1=1 OR R7FRI7_2=1. ]                                                                       |                              |
| <b>Notes</b>                                                                                                                                                       |                                                                                             | Transport (f.eks. skyss med bil, hente/levere i barnehage/på skole) (Hvilken type hjelp utfører du?)             |                              |
| Value                                                                                                                                                              | Label                                                                                       | Cases                                                                                                            | Percentage                   |
| 0                                                                                                                                                                  |                                                                                             | 315                                                                                                              | <div><div></div></div> 6.7%  |
| 1                                                                                                                                                                  | Transport (for example giving lifts in your car, collect/deliver to kindergarten/to school) | 296                                                                                                              | <div><div></div></div> 6.3%  |
| 97                                                                                                                                                                 | No answer                                                                                   | 0                                                                                                                |                              |
| 98                                                                                                                                                                 | Not asked                                                                                   | 4078                                                                                                             | <div><div></div></div> 87.0% |
| <i>Warning: these figures indicate the number of cases found in the data file. They cannot be interpreted as summary statistics of the population of interest.</i> |                                                                                             |                                                                                                                  |                              |
| # r7fri7b_7: Provides type of assistance: Gardening and the like                                                                                                   |                                                                                             |                                                                                                                  |                              |
| <b>Information</b>                                                                                                                                                 |                                                                                             | [Type= discrete] [Format=numeric] [Range= 1-1] [Missing=*]                                                       |                              |
| <b>Statistics [NW/ W]</b>                                                                                                                                          |                                                                                             | [Valid=4689 /-] [Invalid=0 /-]                                                                                   |                              |
| <b>Pre-question</b>                                                                                                                                                |                                                                                             | What type of assistance do you provide?<br>More than one answer possible                                         |                              |
| <b>Literal question</b>                                                                                                                                            |                                                                                             | Gardening, repair work in the home and the like.                                                                 |                              |
| <b>Interviewer's instructions</b>                                                                                                                                  |                                                                                             | [Asked if u=1, R7FRI7_1=1 OR R7FRI7_2=1. ]                                                                       |                              |
| Value                                                                                                                                                              | Label                                                                                       | Cases                                                                                                            | Percentage                   |
| 0                                                                                                                                                                  |                                                                                             | 375                                                                                                              | <div><div></div></div> 8.0%  |
| 1                                                                                                                                                                  | Gardening, repair work in the home and the like.                                            | 236                                                                                                              | <div><div></div></div> 5.0%  |
| 97                                                                                                                                                                 | No answer                                                                                   | 0                                                                                                                |                              |
| 98                                                                                                                                                                 | Not asked                                                                                   | 4078                                                                                                             | <div><div></div></div> 87.0% |
| <i>Warning: these figures indicate the number of cases found in the data file. They cannot be interpreted as summary statistics of the population of interest.</i> |                                                                                             |                                                                                                                  |                              |
| # r7fri7b_8: Provides type of assistance: Other                                                                                                                    |                                                                                             |                                                                                                                  |                              |
| <b>Information</b>                                                                                                                                                 |                                                                                             | [Type= discrete] [Format=numeric] [Range= 1-1] [Missing=*]                                                       |                              |
| <b>Statistics [NW/ W]</b>                                                                                                                                          |                                                                                             | [Valid=4689 /-] [Invalid=0 /-]                                                                                   |                              |
| <b>Pre-question</b>                                                                                                                                                |                                                                                             | What type of assistance do you provide?<br>More than one answer possible                                         |                              |
| <b>Literal question</b>                                                                                                                                            |                                                                                             | Other                                                                                                            |                              |
| <b>Interviewer's instructions</b>                                                                                                                                  |                                                                                             | [Asked if u=1, R7FRI7_1=1 OR R7FRI7_2=1. ]                                                                       |                              |

| # r7fri7b_8: Provides type of assistance: Other                                                                                                             |                                                                          |       |                              |
|-------------------------------------------------------------------------------------------------------------------------------------------------------------|--------------------------------------------------------------------------|-------|------------------------------|
| Value                                                                                                                                                       | Label                                                                    | Cases | Percentage                   |
| 0                                                                                                                                                           |                                                                          | 497   | <div><div></div></div> 10.6% |
| 1                                                                                                                                                           | Other                                                                    | 114   | <div><div></div></div> 2.4%  |
| 97                                                                                                                                                          | No answer                                                                | 0     |                              |
| 98                                                                                                                                                          | Not asked                                                                | 4078  | <div><div></div></div> 87.0% |
| Warning: these figures indicate the number of cases found in the data file. They cannot be interpreted as summary statistics of the population of interest. |                                                                          |       |                              |
| # r7fri7b_9: Provides type of assistance: Don't know                                                                                                        |                                                                          |       |                              |
| Information                                                                                                                                                 | [Type= discrete] [Format=numeric] [Range= 1-1] [Missing=*]               |       |                              |
| Statistics [NW/ W]                                                                                                                                          | [Valid=4689 /-] [Invalid=0 /-]                                           |       |                              |
| Pre-question                                                                                                                                                | What type of assistance do you provide?<br>More than one answer possible |       |                              |
| Literal question                                                                                                                                            | Don't know                                                               |       |                              |
| Interviewer's instructions                                                                                                                                  | [Asked if u=1, R7FRI7_1=1 OR R7FRI7_2=1. ]                               |       |                              |
| Value                                                                                                                                                       | Label                                                                    | Cases | Percentage                   |
| 0                                                                                                                                                           |                                                                          | 609   | <div><div></div></div> 13.0% |
| 1                                                                                                                                                           | Don't know                                                               | 2     | <div><div></div></div> 0.0%  |
| 97                                                                                                                                                          | No answer                                                                | 0     |                              |
| 98                                                                                                                                                          | Not asked                                                                | 4078  | <div><div></div></div> 87.0% |
| Warning: these figures indicate the number of cases found in the data file. They cannot be interpreted as summary statistics of the population of interest. |                                                                          |       |                              |
| # r7fri7c: Total time spent assisting during a normal week                                                                                                  |                                                                          |       |                              |
| Information                                                                                                                                                 | [Type= discrete] [Format=numeric] [Range= 1-5] [Missing=*]               |       |                              |
| Statistics [NW/ W]                                                                                                                                          | [Valid=4689 /-] [Invalid=0 /-]                                           |       |                              |
| Literal question                                                                                                                                            | How much time in total do you spend doing this during a normal week?     |       |                              |
| Interviewer's instructions                                                                                                                                  | [Asked if u=1, R7FRI7_1=1 OR R7FRI7_2=2. ]                               |       |                              |
| Value                                                                                                                                                       | Label                                                                    | Cases | Percentage                   |
| 1                                                                                                                                                           | More than 5 hours                                                        | 88    | <div><div></div></div> 1.9%  |
| 2                                                                                                                                                           | 2-5 hours                                                                | 181   | <div><div></div></div> 3.9%  |
| 3                                                                                                                                                           | 1-2 hours                                                                | 200   | <div><div></div></div> 4.3%  |
| 4                                                                                                                                                           | Less than 1 hour                                                         | 104   | <div><div></div></div> 2.2%  |
| 5                                                                                                                                                           | Don't know                                                               | 37    | <div><div></div></div> 0.8%  |
| 97                                                                                                                                                          | No answer                                                                | 1     | <div><div></div></div> 0.0%  |
| 98                                                                                                                                                          | Not asked                                                                | 4078  | <div><div></div></div> 87.0% |
| Warning: these figures indicate the number of cases found in the data file. They cannot be interpreted as summary statistics of the population of interest. |                                                                          |       |                              |
| # r7fri7d: Who do you assist the most?                                                                                                                      |                                                                          |       |                              |
| Information                                                                                                                                                 | [Type= discrete] [Format=numeric] [Range= 1-7] [Missing=*]               |       |                              |
| Statistics [NW/ W]                                                                                                                                          | [Valid=4689 /-] [Invalid=0 /-]                                           |       |                              |
| Literal question                                                                                                                                            | Who do you assist the most?                                              |       |                              |
| Interviewer's instructions                                                                                                                                  | [Asked if u=1, R7FRI7_1=1 OR R7FRI7_2=2. ]                               |       |                              |
| Value                                                                                                                                                       | Label                                                                    | Cases | Percentage                   |
| 1                                                                                                                                                           | Spouse, partner, or the like                                             | 80    | <div><div></div></div> 1.7%  |
| 2                                                                                                                                                           | Children/grand children                                                  | 210   | <div><div></div></div> 4.5%  |
| 3                                                                                                                                                           | Parents/in laws                                                          | 160   | <div><div></div></div> 3.4%  |
| 4                                                                                                                                                           | Siblings                                                                 | 41    | <div><div></div></div> 0.9%  |

| # r7fri7d: Who do you assist the most?                                                                                                                      |                                                                                                                        |       |            |
|-------------------------------------------------------------------------------------------------------------------------------------------------------------|------------------------------------------------------------------------------------------------------------------------|-------|------------|
| Value                                                                                                                                                       | Label                                                                                                                  | Cases | Percentage |
| 5                                                                                                                                                           | Grand parents                                                                                                          | 13    | 0.3%       |
| 6                                                                                                                                                           | Other relative or close relation                                                                                       | 33    | 0.7%       |
| 7                                                                                                                                                           | Other relationship (for example neighbour or friend)                                                                   | 74    | 1.6%       |
| 97                                                                                                                                                          | No answer                                                                                                              | 0     |            |
| 98                                                                                                                                                          | Not asked                                                                                                              | 4078  | 87.0%      |
| Warning: these figures indicate the number of cases found in the data file. They cannot be interpreted as summary statistics of the population of interest. |                                                                                                                        |       |            |
| # r7fr31_1: How well does description of voluntary work fit: Satisfactorily                                                                                 |                                                                                                                        |       |            |
| Information                                                                                                                                                 | [Type= discrete] [Format=numeric] [Range= 1-7] [Missing=*]                                                             |       |            |
| Statistics [NW/ W]                                                                                                                                          | [Valid=4689 /-] [Invalid=0 /-]                                                                                         |       |            |
| Pre-question                                                                                                                                                | If you think about how you view voluntary work, how well or badly do you think these descriptions fit?                 |       |            |
| Literal question                                                                                                                                            | Satisfactorily                                                                                                         |       |            |
| Interviewer's instructions                                                                                                                                  | [Asked if u=1. ]                                                                                                       |       |            |
| Notes                                                                                                                                                       | Tilfredsstillende (Om du tenker på hvordan du ser på frivillig arbeid, hvor godt eller dårlig synes du disse beskrivel |       |            |
| Value                                                                                                                                                       | Label                                                                                                                  | Cases | Percentage |
| 1                                                                                                                                                           | Very well                                                                                                              | 148   | 3.2%       |
| 2                                                                                                                                                           | Well                                                                                                                   | 523   | 11.2%      |
| 3                                                                                                                                                           | Somewhat well                                                                                                          | 212   | 4.5%       |
| 4                                                                                                                                                           | Neither well nor badly                                                                                                 | 165   | 3.5%       |
| 5                                                                                                                                                           | Somewhat badly                                                                                                         | 13    | 0.3%       |
| 6                                                                                                                                                           | Badly                                                                                                                  | 4     | 0.1%       |
| 7                                                                                                                                                           | Very badly                                                                                                             | 1     | 0.0%       |
| 97                                                                                                                                                          | No answer                                                                                                              | 118   | 2.5%       |
| 98                                                                                                                                                          | Not asked                                                                                                              | 3505  | 74.7%      |
| Warning: these figures indicate the number of cases found in the data file. They cannot be interpreted as summary statistics of the population of interest. |                                                                                                                        |       |            |
| # r7fr31_2: How well does description of voluntary work fit: Rewarding                                                                                      |                                                                                                                        |       |            |
| Information                                                                                                                                                 | [Type= discrete] [Format=numeric] [Range= 1-7] [Missing=*]                                                             |       |            |
| Statistics [NW/ W]                                                                                                                                          | [Valid=4689 /-] [Invalid=0 /-]                                                                                         |       |            |
| Pre-question                                                                                                                                                | If you think about how you view voluntary work, how well or badly do you think these descriptions fit?                 |       |            |
| Literal question                                                                                                                                            | Rewarding                                                                                                              |       |            |
| Interviewer's instructions                                                                                                                                  | [Asked if u=1. ]                                                                                                       |       |            |
| Notes                                                                                                                                                       | Givende (Om du tenker på hvordan du ser på frivillig arbeid, hvor godt eller dårlig synes du disse beskrivelsene passe |       |            |
| Value                                                                                                                                                       | Label                                                                                                                  | Cases | Percentage |
| 1                                                                                                                                                           | Very well                                                                                                              | 201   | 4.3%       |
| 2                                                                                                                                                           | Well                                                                                                                   | 539   | 11.5%      |
| 3                                                                                                                                                           | Somewhat well                                                                                                          | 191   | 4.1%       |
| 4                                                                                                                                                           | Neither well nor badly                                                                                                 | 128   | 2.7%       |
| 5                                                                                                                                                           | Somewhat badly                                                                                                         | 9     | 0.2%       |
| 6                                                                                                                                                           | Badly                                                                                                                  | 5     | 0.1%       |
| 7                                                                                                                                                           | Very badly                                                                                                             | 1     | 0.0%       |
| 97                                                                                                                                                          | No answer                                                                                                              | 110   | 2.3%       |
| 98                                                                                                                                                          | Not asked                                                                                                              | 3505  | 74.7%      |
| Warning: these figures indicate the number of cases found in the data file. They cannot be interpreted as summary statistics of the population of interest. |                                                                                                                        |       |            |

| # r7fr31_3: How well does description of voluntary work fit: Exciting                                                                                       |                                                                                                                        |       |                              |
|-------------------------------------------------------------------------------------------------------------------------------------------------------------|------------------------------------------------------------------------------------------------------------------------|-------|------------------------------|
| Information                                                                                                                                                 | [Type= discrete] [Format=numeric] [Range= 1-7] [Missing=*]                                                             |       |                              |
| Statistics [NW/ W]                                                                                                                                          | [Valid=4689 /-] [Invalid=0 /-]                                                                                         |       |                              |
| Pre-question                                                                                                                                                | If you think about how you view voluntary work, how well or badly do you think these descriptions fit?                 |       |                              |
| Literal question                                                                                                                                            | Exciting                                                                                                               |       |                              |
| Interviewer's instructions                                                                                                                                  | [Asked if u=1. ]                                                                                                       |       |                              |
| Notes                                                                                                                                                       | Spennende (Om du tenker på hvordan du ser på frivillig arbeid, hvor godt eller dårlig synes du disse beskrivelsene pas |       |                              |
| Value                                                                                                                                                       | Label                                                                                                                  | Cases | Percentage                   |
| 1                                                                                                                                                           | Very well                                                                                                              | 75    | <div><div></div></div> 1.6%  |
| 2                                                                                                                                                           | Well                                                                                                                   | 319   | <div><div></div></div> 6.8%  |
| 3                                                                                                                                                           | Somewhat well                                                                                                          | 275   | <div><div></div></div> 5.9%  |
| 4                                                                                                                                                           | Neither well nor badly                                                                                                 | 300   | <div><div></div></div> 6.4%  |
| 5                                                                                                                                                           | Somewhat badly                                                                                                         | 56    | <div><div></div></div> 1.2%  |
| 6                                                                                                                                                           | Badly                                                                                                                  | 20    | <div><div></div></div> 0.4%  |
| 7                                                                                                                                                           | Very badly                                                                                                             | 6     | <div><div></div></div> 0.1%  |
| 97                                                                                                                                                          | No answer                                                                                                              | 133   | <div><div></div></div> 2.8%  |
| 98                                                                                                                                                          | Not asked                                                                                                              | 3505  | <div><div></div></div> 74.7% |
| Warning: these figures indicate the number of cases found in the data file. They cannot be interpreted as summary statistics of the population of interest. |                                                                                                                        |       |                              |
| # r7fr31_4: How well does description of voluntary work fit: Important                                                                                      |                                                                                                                        |       |                              |
| Information                                                                                                                                                 | [Type= discrete] [Format=numeric] [Range= 1-7] [Missing=*]                                                             |       |                              |
| Statistics [NW/ W]                                                                                                                                          | [Valid=4689 /-] [Invalid=0 /-]                                                                                         |       |                              |
| Pre-question                                                                                                                                                | If you think about how you view voluntary work, how well or badly do you think these descriptions fit?                 |       |                              |
| Literal question                                                                                                                                            | Important                                                                                                              |       |                              |
| Interviewer's instructions                                                                                                                                  | [Asked if u=1. ]                                                                                                       |       |                              |
| Notes                                                                                                                                                       | Viktig (Om du tenker på hvordan du ser på frivillig arbeid, hvor godt eller dårlig synes du disse beskrivelsene passer |       |                              |
| Value                                                                                                                                                       | Label                                                                                                                  | Cases | Percentage                   |
| 1                                                                                                                                                           | Very well                                                                                                              | 356   | <div><div></div></div> 7.6%  |
| 2                                                                                                                                                           | Well                                                                                                                   | 489   | <div><div></div></div> 10.4% |
| 3                                                                                                                                                           | Somewhat well                                                                                                          | 139   | <div><div></div></div> 3.0%  |
| 4                                                                                                                                                           | Neither well nor badly                                                                                                 | 91    | <div><div></div></div> 1.9%  |
| 5                                                                                                                                                           | Somewhat badly                                                                                                         | 5     | <div><div></div></div> 0.1%  |
| 6                                                                                                                                                           | Badly                                                                                                                  | 3     | <div><div></div></div> 0.1%  |
| 7                                                                                                                                                           | Very badly                                                                                                             | 2     | <div><div></div></div> 0.0%  |
| 97                                                                                                                                                          | No answer                                                                                                              | 99    | <div><div></div></div> 2.1%  |
| 98                                                                                                                                                          | Not asked                                                                                                              | 3505  | <div><div></div></div> 74.7% |
| Warning: these figures indicate the number of cases found in the data file. They cannot be interpreted as summary statistics of the population of interest. |                                                                                                                        |       |                              |
| # r7fr31_5: How well does description of voluntary work fit: Fun                                                                                            |                                                                                                                        |       |                              |
| Information                                                                                                                                                 | [Type= discrete] [Format=numeric] [Range= 1-7] [Missing=*]                                                             |       |                              |
| Statistics [NW/ W]                                                                                                                                          | [Valid=4689 /-] [Invalid=0 /-]                                                                                         |       |                              |
| Pre-question                                                                                                                                                | If you think about how you view voluntary work, how well or badly do you think these descriptions fit?                 |       |                              |
| Literal question                                                                                                                                            | Fun                                                                                                                    |       |                              |
| Interviewer's instructions                                                                                                                                  | [Asked if u=1. ]                                                                                                       |       |                              |
| Notes                                                                                                                                                       | Morsomt (Om du tenker på hvordan du ser på frivillig arbeid, hvor godt eller dårlig synes du disse beskrivelsene passe |       |                              |

### # r7fr31\_5: How well does description of voluntary work fit: Fun

| Value | Label                  | Cases | Percentage |
|-------|------------------------|-------|------------|
| 1     | Very well              | 72    | 1.5%       |
| 2     | Well                   | 320   | 6.8%       |
| 3     | Somewhat well          | 317   | 6.8%       |
| 4     | Neither well nor badly | 296   | 6.3%       |
| 5     | Somewhat badly         | 35    | 0.7%       |
| 6     | Badly                  | 16    | 0.3%       |
| 7     | Very badly             | 6     | 0.1%       |
| 97    | No answer              | 122   | 2.6%       |
| 98    | Not asked              | 3505  | 74.7%      |

Warning: these figures indicate the number of cases found in the data file. They cannot be interpreted as summary statistics of the population of interest.

### # r7fr31\_6: How well does description of voluntary work fit: Challenging

|                                   |                                                                                                                        |
|-----------------------------------|------------------------------------------------------------------------------------------------------------------------|
| <b>Information</b>                | [Type= discrete] [Format=numeric] [Range= 1-7] [Missing=*]                                                             |
| <b>Statistics [NW/ W]</b>         | [Valid=4689 /-] [Invalid=0 /-]                                                                                         |
| <b>Pre-question</b>               | If you think about how you view voluntary work, how well or badly do you think these descriptions fit?                 |
| <b>Literal question</b>           | Challenging                                                                                                            |
| <b>Interviewer's instructions</b> | [Asked if u=1. ]                                                                                                       |
| <b>Notes</b>                      | Utfordrende (Om du tenker på hvordan du ser på frivillig arbeid, hvor godt eller dårlig synes du disse beskrivelsene p |

| Value | Label                  | Cases | Percentage |
|-------|------------------------|-------|------------|
| 1     | Very well              | 101   | 2.2%       |
| 2     | Well                   | 365   | 7.8%       |
| 3     | Somewhat well          | 292   | 6.2%       |
| 4     | Neither well nor badly | 239   | 5.1%       |
| 5     | Somewhat badly         | 34    | 0.7%       |
| 6     | Badly                  | 19    | 0.4%       |
| 7     | Very badly             | 9     | 0.2%       |
| 97    | No answer              | 125   | 2.7%       |
| 98    | Not asked              | 3505  | 74.7%      |

Warning: these figures indicate the number of cases found in the data file. They cannot be interpreted as summary statistics of the population of interest.

### # r7fr31\_7: How well does description of voluntary work fit: Disappointing

|                                   |                                                                                                                        |
|-----------------------------------|------------------------------------------------------------------------------------------------------------------------|
| <b>Information</b>                | [Type= discrete] [Format=numeric] [Range= 1-7] [Missing=*]                                                             |
| <b>Statistics [NW/ W]</b>         | [Valid=4689 /-] [Invalid=0 /-]                                                                                         |
| <b>Pre-question</b>               | If you think about how you view voluntary work, how well or badly do you think these descriptions fit?                 |
| <b>Literal question</b>           | Disappointing                                                                                                          |
| <b>Interviewer's instructions</b> | [Asked if u=1. ]                                                                                                       |
| <b>Notes</b>                      | Skuffende (Om du tenker på hvordan du ser på frivillig arbeid, hvor godt eller dårlig synes du disse beskrivelsene pas |

| Value | Label                  | Cases | Percentage |
|-------|------------------------|-------|------------|
| 1     | Very well              | 7     | 0.1%       |
| 2     | Well                   | 31    | 0.7%       |
| 3     | Somewhat well          | 60    | 1.3%       |
| 4     | Neither well nor badly | 340   | 7.3%       |
| 5     | Somewhat badly         | 197   | 4.2%       |
| 6     | Badly                  | 256   | 5.5%       |



| # r7fr31_7: How well does description of voluntary work fit: Disappointing                                                                                  |                                                                                                                        |       |                              |
|-------------------------------------------------------------------------------------------------------------------------------------------------------------|------------------------------------------------------------------------------------------------------------------------|-------|------------------------------|
| Value                                                                                                                                                       | Label                                                                                                                  | Cases | Percentage                   |
| 7                                                                                                                                                           | Very badly                                                                                                             | 134   | <div><div></div></div> 2.9%  |
| 97                                                                                                                                                          | No answer                                                                                                              | 159   | <div><div></div></div> 3.4%  |
| 98                                                                                                                                                          | Not asked                                                                                                              | 3505  | <div><div></div></div> 74.7% |
| Warning: these figures indicate the number of cases found in the data file. They cannot be interpreted as summary statistics of the population of interest. |                                                                                                                        |       |                              |
| # r7fr31_8: How well does description of voluntary work fit: Emotionally exhausting                                                                         |                                                                                                                        |       |                              |
| Information                                                                                                                                                 | [Type= discrete] [Format=numeric] [Range= 1-7] [Missing=*]                                                             |       |                              |
| Statistics [NW/ W]                                                                                                                                          | [Valid=4689 /-] [Invalid=0 /-]                                                                                         |       |                              |
| Pre-question                                                                                                                                                | If you think about how you view voluntary work, how well or badly do you think these descriptions fit?                 |       |                              |
| Literal question                                                                                                                                            | Emotionally exhausting                                                                                                 |       |                              |
| Interviewer's instructions                                                                                                                                  | [Asked if u=1. ]                                                                                                       |       |                              |
| Notes                                                                                                                                                       | Følelsesmessig utmattende (Om du tenker på hvordan du ser på frivillig arbeid, hvor godt eller dårlig synes du disse   |       |                              |
| Value                                                                                                                                                       | Label                                                                                                                  | Cases | Percentage                   |
| 1                                                                                                                                                           | Very well                                                                                                              | 17    | <div><div></div></div> 0.4%  |
| 2                                                                                                                                                           | Well                                                                                                                   | 92    | <div><div></div></div> 2.0%  |
| 3                                                                                                                                                           | Somewhat well                                                                                                          | 157   | <div><div></div></div> 3.3%  |
| 4                                                                                                                                                           | Neither well nor badly                                                                                                 | 357   | <div><div></div></div> 7.6%  |
| 5                                                                                                                                                           | Somewhat badly                                                                                                         | 144   | <div><div></div></div> 3.1%  |
| 6                                                                                                                                                           | Badly                                                                                                                  | 176   | <div><div></div></div> 3.8%  |
| 7                                                                                                                                                           | Very badly                                                                                                             | 93    | <div><div></div></div> 2.0%  |
| 97                                                                                                                                                          | No answer                                                                                                              | 148   | <div><div></div></div> 3.2%  |
| 98                                                                                                                                                          | Not asked                                                                                                              | 3505  | <div><div></div></div> 74.7% |
| Warning: these figures indicate the number of cases found in the data file. They cannot be interpreted as summary statistics of the population of interest. |                                                                                                                        |       |                              |
| # r7fr31_9: How well does description of voluntary work fit: Physically tiring                                                                              |                                                                                                                        |       |                              |
| Information                                                                                                                                                 | [Type= discrete] [Format=numeric] [Range= 1-7] [Missing=*]                                                             |       |                              |
| Statistics [NW/ W]                                                                                                                                          | [Valid=4689 /-] [Invalid=0 /-]                                                                                         |       |                              |
| Pre-question                                                                                                                                                | If you think about how you view voluntary work, how well or badly do you think these descriptions fit?                 |       |                              |
| Literal question                                                                                                                                            | Physically tiring                                                                                                      |       |                              |
| Interviewer's instructions                                                                                                                                  | [Asked if u=1. ]                                                                                                       |       |                              |
| Notes                                                                                                                                                       | Fysisk slitsomt (Om du tenker på hvordan du ser på frivillig arbeid, hvor godt eller dårlig synes du disse beskrivelse |       |                              |
| Value                                                                                                                                                       | Label                                                                                                                  | Cases | Percentage                   |
| 1                                                                                                                                                           | Very well                                                                                                              | 13    | <div><div></div></div> 0.3%  |
| 2                                                                                                                                                           | Well                                                                                                                   | 93    | <div><div></div></div> 2.0%  |
| 3                                                                                                                                                           | Somewhat well                                                                                                          | 193   | <div><div></div></div> 4.1%  |
| 4                                                                                                                                                           | Neither well nor badly                                                                                                 | 378   | <div><div></div></div> 8.1%  |
| 5                                                                                                                                                           | Somewhat badly                                                                                                         | 133   | <div><div></div></div> 2.8%  |
| 6                                                                                                                                                           | Badly                                                                                                                  | 150   | <div><div></div></div> 3.2%  |
| 7                                                                                                                                                           | Very badly                                                                                                             | 76    | <div><div></div></div> 1.6%  |
| 97                                                                                                                                                          | No answer                                                                                                              | 148   | <div><div></div></div> 3.2%  |
| 98                                                                                                                                                          | Not asked                                                                                                              | 3505  | <div><div></div></div> 74.7% |
| Warning: these figures indicate the number of cases found in the data file. They cannot be interpreted as summary statistics of the population of interest. |                                                                                                                        |       |                              |
| # r7fr31_10: How well does description of voluntary work fit: Frustrating                                                                                   |                                                                                                                        |       |                              |
| Information                                                                                                                                                 | [Type= discrete] [Format=numeric] [Range= 1-7] [Missing=*]                                                             |       |                              |

| # r7fr31_10: How well does description of voluntary work fit: Frustrating                                                                                   |                                                                                                                        |       |            |
|-------------------------------------------------------------------------------------------------------------------------------------------------------------|------------------------------------------------------------------------------------------------------------------------|-------|------------|
| Statistics [NW/ W]                                                                                                                                          | [Valid=4689 /-] [Invalid=0 /-]                                                                                         |       |            |
| Pre-question                                                                                                                                                | If you think about how you view voluntary work, how well or badly do you think these descriptions fit?                 |       |            |
| Literal question                                                                                                                                            | Frustrating                                                                                                            |       |            |
| Interviewer's instructions                                                                                                                                  | [Asked if u=1. ]                                                                                                       |       |            |
| Notes                                                                                                                                                       | Frustrerende (Om du tenker på hvordan du ser på frivillig arbeid, hvor godt eller dårlig synes du disse beskrivelsene  |       |            |
| Value                                                                                                                                                       | Label                                                                                                                  | Cases | Percentage |
| 1                                                                                                                                                           | Very well                                                                                                              | 7     | 0.1%       |
| 2                                                                                                                                                           | Well                                                                                                                   | 52    | 1.1%       |
| 3                                                                                                                                                           | Somewhat well                                                                                                          | 146   | 3.1%       |
| 4                                                                                                                                                           | Neither well nor badly                                                                                                 | 359   | 7.7%       |
| 5                                                                                                                                                           | Somewhat badly                                                                                                         | 150   | 3.2%       |
| 6                                                                                                                                                           | Badly                                                                                                                  | 193   | 4.1%       |
| 7                                                                                                                                                           | Very badly                                                                                                             | 113   | 2.4%       |
| 97                                                                                                                                                          | No answer                                                                                                              | 164   | 3.5%       |
| 98                                                                                                                                                          | Not asked                                                                                                              | 3505  | 74.7%      |
| Warning: these figures indicate the number of cases found in the data file. They cannot be interpreted as summary statistics of the population of interest. |                                                                                                                        |       |            |
| # r7fr31_11: How well does description of voluntary work fit: Depressing                                                                                    |                                                                                                                        |       |            |
| Information                                                                                                                                                 | [Type= discrete] [Format=numeric] [Range= 1-7] [Missing=*]                                                             |       |            |
| Statistics [NW/ W]                                                                                                                                          | [Valid=4689 /-] [Invalid=0 /-]                                                                                         |       |            |
| Pre-question                                                                                                                                                | If you think about how you view voluntary work, how well or badly do you think these descriptions fit?                 |       |            |
| Literal question                                                                                                                                            | Depressing                                                                                                             |       |            |
| Interviewer's instructions                                                                                                                                  | [Asked if u=1. ]                                                                                                       |       |            |
| Notes                                                                                                                                                       | Deprimerende (Om du tenker på hvordan du ser på frivillig arbeid, hvor godt eller dårlig synes du disse beskrivelsene  |       |            |
| Value                                                                                                                                                       | Label                                                                                                                  | Cases | Percentage |
| 1                                                                                                                                                           | Very well                                                                                                              | 5     | 0.1%       |
| 2                                                                                                                                                           | Well                                                                                                                   | 24    | 0.5%       |
| 3                                                                                                                                                           | Somewhat well                                                                                                          | 71    | 1.5%       |
| 4                                                                                                                                                           | Neither well nor badly                                                                                                 | 321   | 6.8%       |
| 5                                                                                                                                                           | Somewhat badly                                                                                                         | 148   | 3.2%       |
| 6                                                                                                                                                           | Badly                                                                                                                  | 244   | 5.2%       |
| 7                                                                                                                                                           | Very badly                                                                                                             | 208   | 4.4%       |
| 97                                                                                                                                                          | No answer                                                                                                              | 163   | 3.5%       |
| 98                                                                                                                                                          | Not asked                                                                                                              | 3505  | 74.7%      |
| Warning: these figures indicate the number of cases found in the data file. They cannot be interpreted as summary statistics of the population of interest. |                                                                                                                        |       |            |
| # r7fr31_12: How well does description of voluntary work fit: Time consuming                                                                                |                                                                                                                        |       |            |
| Information                                                                                                                                                 | [Type= discrete] [Format=numeric] [Range= 1-7] [Missing=*]                                                             |       |            |
| Statistics [NW/ W]                                                                                                                                          | [Valid=4689 /-] [Invalid=0 /-]                                                                                         |       |            |
| Pre-question                                                                                                                                                | If you think about how you view voluntary work, how well or badly do you think these descriptions fit?                 |       |            |
| Literal question                                                                                                                                            | Time consuming                                                                                                         |       |            |
| Interviewer's instructions                                                                                                                                  | [Asked if u=1. ]                                                                                                       |       |            |
| Notes                                                                                                                                                       | Tidkrevende (Om du tenker på hvordan du ser på frivillig arbeid, hvor godt eller dårlig synes du disse beskrivelsene p |       |            |
| Value                                                                                                                                                       | Label                                                                                                                  | Cases | Percentage |
| 1                                                                                                                                                           | Very well                                                                                                              | 48    | 1.0%       |

| # r7fr31_12: How well does description of voluntary work fit: Time consuming                                                                                |                                                                                                                                    |       |                              |
|-------------------------------------------------------------------------------------------------------------------------------------------------------------|------------------------------------------------------------------------------------------------------------------------------------|-------|------------------------------|
| Value                                                                                                                                                       | Label                                                                                                                              | Cases | Percentage                   |
| 2                                                                                                                                                           | Well                                                                                                                               | 192   | <div><div></div></div> 4.1%  |
| 3                                                                                                                                                           | Somewhat well                                                                                                                      | 271   | <div><div></div></div> 5.8%  |
| 4                                                                                                                                                           | Neither well nor badly                                                                                                             | 329   | <div><div></div></div> 7.0%  |
| 5                                                                                                                                                           | Somewhat badly                                                                                                                     | 79    | <div><div></div></div> 1.7%  |
| 6                                                                                                                                                           | Badly                                                                                                                              | 75    | <div><div></div></div> 1.6%  |
| 7                                                                                                                                                           | Very badly                                                                                                                         | 39    | <div><div></div></div> 0.8%  |
| 97                                                                                                                                                          | No answer                                                                                                                          | 151   | <div><div></div></div> 3.2%  |
| 98                                                                                                                                                          | Not asked                                                                                                                          | 3505  | <div><div></div></div> 74.7% |
| Warning: these figures indicate the number of cases found in the data file. They cannot be interpreted as summary statistics of the population of interest. |                                                                                                                                    |       |                              |
| # r7fr31_13: How well does description of voluntary work fit: Easy                                                                                          |                                                                                                                                    |       |                              |
| Information                                                                                                                                                 | [Type= discrete] [Format=numeric] [Range= 1-7] [Missing=*]                                                                         |       |                              |
| Statistics [NW/ W]                                                                                                                                          | [Valid=4689 /-] [Invalid=0 /-]                                                                                                     |       |                              |
| Pre-question                                                                                                                                                | If you think about how you view voluntary work, how well or badly do you think these descriptions fit?                             |       |                              |
| Literal question                                                                                                                                            | Easy                                                                                                                               |       |                              |
| Interviewer's instructions                                                                                                                                  | [Asked if u=1. ]                                                                                                                   |       |                              |
| Notes                                                                                                                                                       | Lett (Om du tenker på hvordan du ser på frivillig arbeid, hvor godt eller dårlig synes du disse beskrivelsene passer?)             |       |                              |
| Value                                                                                                                                                       | Label                                                                                                                              | Cases | Percentage                   |
| 1                                                                                                                                                           | Very well                                                                                                                          | 30    | <div><div></div></div> 0.6%  |
| 2                                                                                                                                                           | Well                                                                                                                               | 164   | <div><div></div></div> 3.5%  |
| 3                                                                                                                                                           | Somewhat well                                                                                                                      | 196   | <div><div></div></div> 4.2%  |
| 4                                                                                                                                                           | Neither well nor badly                                                                                                             | 454   | <div><div></div></div> 9.7%  |
| 5                                                                                                                                                           | Somewhat badly                                                                                                                     | 105   | <div><div></div></div> 2.2%  |
| 6                                                                                                                                                           | Badly                                                                                                                              | 57    | <div><div></div></div> 1.2%  |
| 7                                                                                                                                                           | Very badly                                                                                                                         | 26    | <div><div></div></div> 0.6%  |
| 97                                                                                                                                                          | No answer                                                                                                                          | 152   | <div><div></div></div> 3.2%  |
| 98                                                                                                                                                          | Not asked                                                                                                                          | 3505  | <div><div></div></div> 74.7% |
| Warning: these figures indicate the number of cases found in the data file. They cannot be interpreted as summary statistics of the population of interest. |                                                                                                                                    |       |                              |
| # r7fri14: Have you participated in any protests the past year to improve society?                                                                          |                                                                                                                                    |       |                              |
| Information                                                                                                                                                 | [Type= discrete] [Format=numeric] [Range= 1-2] [Missing=*]                                                                         |       |                              |
| Statistics [NW/ W]                                                                                                                                          | [Valid=4689 /-] [Invalid=0 /-]                                                                                                     |       |                              |
| Literal question                                                                                                                                            | Have you participated in any protests or demonstrations during the past year in an attempt to bring about improvements in society? |       |                              |
| Interviewer's instructions                                                                                                                                  | [Asked if u=1. ]                                                                                                                   |       |                              |
| Notes                                                                                                                                                       | Har du det siste året deltatt i protestaksjoner eller demonstrasjoner i et forsøk på å få til forbedringer i samfunn               |       |                              |
| Value                                                                                                                                                       | Label                                                                                                                              | Cases | Percentage                   |
| 1                                                                                                                                                           | Yes                                                                                                                                | 116   | <div><div></div></div> 2.5%  |
| 2                                                                                                                                                           | No                                                                                                                                 | 1036  | <div><div></div></div> 22.1% |
| 97                                                                                                                                                          | No answer                                                                                                                          | 32    | <div><div></div></div> 0.7%  |
| 98                                                                                                                                                          | Not asked                                                                                                                          | 3505  | <div><div></div></div> 74.7% |
| Warning: these figures indicate the number of cases found in the data file. They cannot be interpreted as summary statistics of the population of interest. |                                                                                                                                    |       |                              |
| # r7fri15: Who organised the most recent protest you participated in?                                                                                       |                                                                                                                                    |       |                              |
| Information                                                                                                                                                 | [Type= discrete] [Format=numeric] [Range= 1-2] [Missing=*]                                                                         |       |                              |
| Statistics [NW/ W]                                                                                                                                          | [Valid=4689 /-] [Invalid=0 /-]                                                                                                     |       |                              |

| # r7fri15: Who organised the most recent protest you participated in?                                                                                              |                                                                          |                                                                                                                           |            |
|--------------------------------------------------------------------------------------------------------------------------------------------------------------------|--------------------------------------------------------------------------|---------------------------------------------------------------------------------------------------------------------------|------------|
| <b>Literal question</b>                                                                                                                                            |                                                                          | If you cast your mind back to the most recent protest or demonstration that you participated in, who was it organised by? |            |
| <b>Interviewer's instructions</b>                                                                                                                                  |                                                                          | [Asked if u=1 and R7FRI14=1. ]                                                                                            |            |
| <b>Notes</b>                                                                                                                                                       |                                                                          | Om du tenker tilbake på den siste aksjonen eller demonstrasjonen du deltok i, hvem var det som arrangerte denne?          |            |
| Value                                                                                                                                                              | Label                                                                    | Cases                                                                                                                     | Percentage |
| 1                                                                                                                                                                  | A voluntary organisation, union or party                                 | 76                                                                                                                        | 1.6%       |
| 2                                                                                                                                                                  | Individuals or a non-organised group or network                          | 39                                                                                                                        | 0.8%       |
| 97                                                                                                                                                                 | No answer                                                                | 1                                                                                                                         | 0.0%       |
| 98                                                                                                                                                                 | Not asked                                                                | 4573                                                                                                                      | 97.5%      |
| <i>Warning: these figures indicate the number of cases found in the data file. They cannot be interpreted as summary statistics of the population of interest.</i> |                                                                          |                                                                                                                           |            |
| # r7fri16: What type of organisation/union/party was it?                                                                                                           |                                                                          |                                                                                                                           |            |
| <b>Information</b>                                                                                                                                                 |                                                                          | [Type= discrete] [Format=numeric] [Range= 1-16] [Missing=*]                                                               |            |
| <b>Statistics [NW/ W]</b>                                                                                                                                          |                                                                          | [Valid=4689 /-] [Invalid=0 /-]                                                                                            |            |
| <b>Literal question</b>                                                                                                                                            |                                                                          | What type of organisation, union or party was it?                                                                         |            |
| <b>Interviewer's instructions</b>                                                                                                                                  |                                                                          | [Asked if u=1 and R7FRI15=1. ]                                                                                            |            |
| Value                                                                                                                                                              | Label                                                                    | Cases                                                                                                                     | Percentage |
| 1                                                                                                                                                                  | Art and culture, band and choir                                          | 7                                                                                                                         | 0.1%       |
| 2                                                                                                                                                                  | Athletics and sport                                                      | 1                                                                                                                         | 0.0%       |
| 3                                                                                                                                                                  | Hobbies, recreation, outdoor activity                                    | 0                                                                                                                         |            |
| 4                                                                                                                                                                  | Education, training and research                                         | 1                                                                                                                         | 0.0%       |
| 5                                                                                                                                                                  | Health, nursing and rescue work                                          | 2                                                                                                                         | 0.0%       |
| 6                                                                                                                                                                  | Social services and substance abuse care                                 | 2                                                                                                                         | 0.0%       |
| 7                                                                                                                                                                  | Nature, environmental and animal protection                              | 19                                                                                                                        | 0.4%       |
| 8                                                                                                                                                                  | Residents' associations, community associations and local neighbourhood  | 2                                                                                                                         | 0.0%       |
| 9                                                                                                                                                                  | Housing co-operatives and housing associations                           | 0                                                                                                                         |            |
| 10                                                                                                                                                                 | Rights, support and advocacy work                                        | 6                                                                                                                         | 0.1%       |
| 11                                                                                                                                                                 | Political parties                                                        | 12                                                                                                                        | 0.3%       |
| 12                                                                                                                                                                 | International exchange, emergency help, assistance and human rights work | 9                                                                                                                         | 0.2%       |
| 13                                                                                                                                                                 | Vocational, industry and trade unions and associations                   | 7                                                                                                                         | 0.1%       |
| 14                                                                                                                                                                 | Religion and beliefs including the Church of Norway                      | 1                                                                                                                         | 0.0%       |
| 15                                                                                                                                                                 | Immigrant organisations                                                  | 3                                                                                                                         | 0.1%       |
| 16                                                                                                                                                                 | Other, specify                                                           | 4                                                                                                                         | 0.1%       |
| 97                                                                                                                                                                 | No answer                                                                | 0                                                                                                                         |            |
| 98                                                                                                                                                                 | Not asked                                                                | 4613                                                                                                                      | 98.4%      |
| <i>Warning: these figures indicate the number of cases found in the data file. They cannot be interpreted as summary statistics of the population of interest.</i> |                                                                          |                                                                                                                           |            |
| # r7fri16_16_other: What type of organisation/union/party was it? Other [anonymized]                                                                               |                                                                          |                                                                                                                           |            |
| <b>Information</b>                                                                                                                                                 |                                                                          | [Type= discrete] [Format=character] [Missing=*]                                                                           |            |
| <b>Statistics [NW/ W]</b>                                                                                                                                          |                                                                          | [Valid=4689 /-] [Invalid=0 /-]                                                                                            |            |
| <b>Literal question</b>                                                                                                                                            |                                                                          | What type of organisation, union or party was it?                                                                         |            |
| <b>Interviewer's instructions</b>                                                                                                                                  |                                                                          | [Asked if u=1 and R7FRI15=1. ]                                                                                            |            |
|                                                                                                                                                                    |                                                                          | [Data withheld for the sake of anonymity]                                                                                 |            |
| Value                                                                                                                                                              | Label                                                                    | Cases                                                                                                                     | Percentage |
|                                                                                                                                                                    |                                                                          | 4689                                                                                                                      | 100.0%     |

| # r7fri16_16_other: What type of organisation/union/party was it? Other [anonymized]                                                                        |                                                                |       |            |
|-------------------------------------------------------------------------------------------------------------------------------------------------------------|----------------------------------------------------------------|-------|------------|
| Value                                                                                                                                                       | Label                                                          | Cases | Percentage |
| 97                                                                                                                                                          | No answer                                                      | 0     |            |
| 98                                                                                                                                                          | Not asked                                                      | 0     |            |
| Warning: these figures indicate the number of cases found in the data file. They cannot be interpreted as summary statistics of the population of interest. |                                                                |       |            |
| # r7fri17: How did you first hear about this protest?                                                                                                       |                                                                |       |            |
| Information                                                                                                                                                 | [Type= discrete] [Format=numeric] [Range= 1-5] [Missing=*]     |       |            |
| Statistics [NW/ W]                                                                                                                                          | [Valid=4689 /-] [Invalid=0 /-]                                 |       |            |
| Literal question                                                                                                                                            | How did you first hear about this protest?                     |       |            |
| Interviewer's instructions                                                                                                                                  | [Asked if u=1 and R7FRI14=1. ]                                 |       |            |
| Value                                                                                                                                                       | Label                                                          | Cases | Percentage |
| 1                                                                                                                                                           | Through an organisation, union or party of which I am a member | 25    | 0.5%       |
| 2                                                                                                                                                           | Through colleagues at work or fellow students                  | 3     | 0.1%       |
| 3                                                                                                                                                           | Through social networks, friends and acquaintances             | 54    | 1.2%       |
| 4                                                                                                                                                           | Through the media                                              | 28    | 0.6%       |
| 5                                                                                                                                                           | In a different way                                             | 5     | 0.1%       |
| 97                                                                                                                                                          | No answer                                                      | 1     | 0.0%       |
| 98                                                                                                                                                          | Not asked                                                      | 4573  | 97.5%      |
| Warning: these figures indicate the number of cases found in the data file. They cannot be interpreted as summary statistics of the population of interest. |                                                                |       |            |
| # r7fri18: The way you first heard about this protest                                                                                                       |                                                                |       |            |
| Information                                                                                                                                                 | [Type= discrete] [Format=numeric] [Range= 1-11] [Missing=*]    |       |            |
| Statistics [NW/ W]                                                                                                                                          | [Valid=4689 /-] [Invalid=0 /-]                                 |       |            |
| Literal question                                                                                                                                            | In what way did you first hear about this protest?             |       |            |
| Interviewer's instructions                                                                                                                                  | [Asked if u=1 and R7FRI14=1. ]                                 |       |            |
| Value                                                                                                                                                       | Label                                                          | Cases | Percentage |
| 1                                                                                                                                                           | Talking face to face                                           | 15    | 0.3%       |
| 2                                                                                                                                                           | Telephone conversation                                         | 3     | 0.1%       |
| 3                                                                                                                                                           | SMS                                                            | 3     | 0.1%       |
| 4                                                                                                                                                           | Posters/notices                                                | 1     | 0.0%       |
| 5                                                                                                                                                           | Newspapers/magazines                                           | 6     | 0.1%       |
| 6                                                                                                                                                           | Online newspaper                                               | 4     | 0.1%       |
| 7                                                                                                                                                           | E-mail                                                         | 13    | 0.3%       |
| 8                                                                                                                                                           | Facebook                                                       | 59    | 1.3%       |
| 9                                                                                                                                                           | Other social media                                             | 3     | 0.1%       |
| 10                                                                                                                                                          | TV/radio                                                       | 3     | 0.1%       |
| 11                                                                                                                                                          | Other                                                          | 4     | 0.1%       |
| 97                                                                                                                                                          | No answer                                                      | 2     | 0.0%       |
| 98                                                                                                                                                          | Not asked                                                      | 4573  | 97.5%      |
| Warning: these figures indicate the number of cases found in the data file. They cannot be interpreted as summary statistics of the population of interest. |                                                                |       |            |
| # r7km2: Concern about climate change                                                                                                                       |                                                                |       |            |
| Information                                                                                                                                                 | [Type= discrete] [Format=numeric] [Range= 1-5] [Missing=*]     |       |            |
| Statistics [NW/ W]                                                                                                                                          | [Valid=4689 /-] [Invalid=0 /-]                                 |       |            |
| Literal question                                                                                                                                            | How concerned are you about climate change?                    |       |            |
| Interviewer's instructions                                                                                                                                  | [Asked if u=2. ]                                               |       |            |

| # r7km2: Concern about climate change                                                                                                                       |                                                                                                                          |       |                        |       |
|-------------------------------------------------------------------------------------------------------------------------------------------------------------|--------------------------------------------------------------------------------------------------------------------------|-------|------------------------|-------|
| Value                                                                                                                                                       | Label                                                                                                                    | Cases | Percentage             |       |
| 1                                                                                                                                                           | Very concerned                                                                                                           | 149   | <div><div></div></div> | 3.2%  |
| 2                                                                                                                                                           | Concerned                                                                                                                | 418   | <div><div></div></div> | 8.9%  |
| 3                                                                                                                                                           | Somewhat concerned                                                                                                       | 382   | <div><div></div></div> | 8.1%  |
| 4                                                                                                                                                           | Slightly concerned                                                                                                       | 190   | <div><div></div></div> | 4.1%  |
| 5                                                                                                                                                           | Not concerned at all                                                                                                     | 44    | <div><div></div></div> | 0.9%  |
| 97                                                                                                                                                          | No answer                                                                                                                | 16    | <div><div></div></div> | 0.3%  |
| 98                                                                                                                                                          | Not asked                                                                                                                | 3490  | <div><div></div></div> | 74.4% |
| Warning: these figures indicate the number of cases found in the data file. They cannot be interpreted as summary statistics of the population of interest. |                                                                                                                          |       |                        |       |
| # r7km3_2: Positive/negative: Tighten up regulations governing permitted industrial CO2 emissions in Norway and Europe                                      |                                                                                                                          |       |                        |       |
| Information                                                                                                                                                 | [Type= discrete] [Format=numeric] [Range= 1-7] [Missing=*]                                                               |       |                        |       |
| Statistics [NW/ W]                                                                                                                                          | [Valid=4689 /-] [Invalid=0 /-]                                                                                           |       |                        |       |
| Pre-question                                                                                                                                                | How positive or negative are you about the following measures:                                                           |       |                        |       |
| Literal question                                                                                                                                            | Tighten up the regulations governing the permitted industrial CO2 emissions in Norway and Europe.                        |       |                        |       |
| Interviewer's instructions                                                                                                                                  | [Asked if u=2. ]                                                                                                         |       |                        |       |
| Notes                                                                                                                                                       | Innskjerpe reglene for hvor mye CO2 industrien i Norge og Europa får slippe ut. (Hvor positiv eller negativ er du til f  |       |                        |       |
| Value                                                                                                                                                       | Label                                                                                                                    | Cases | Percentage             |       |
| 1                                                                                                                                                           | Very positive                                                                                                            | 232   | <div><div></div></div> | 4.9%  |
| 2                                                                                                                                                           | Positive                                                                                                                 | 464   | <div><div></div></div> | 9.9%  |
| 3                                                                                                                                                           | Somewhat positive                                                                                                        | 258   | <div><div></div></div> | 5.5%  |
| 4                                                                                                                                                           | Neither positive nor negative                                                                                            | 150   | <div><div></div></div> | 3.2%  |
| 5                                                                                                                                                           | Somewhat negative                                                                                                        | 31    | <div><div></div></div> | 0.7%  |
| 6                                                                                                                                                           | Negative                                                                                                                 | 24    | <div><div></div></div> | 0.5%  |
| 7                                                                                                                                                           | Very negative                                                                                                            | 12    | <div><div></div></div> | 0.3%  |
| 97                                                                                                                                                          | No answer                                                                                                                | 28    | <div><div></div></div> | 0.6%  |
| 98                                                                                                                                                          | Not asked                                                                                                                | 3490  | <div><div></div></div> | 74.4% |
| Warning: these figures indicate the number of cases found in the data file. They cannot be interpreted as summary statistics of the population of interest. |                                                                                                                          |       |                        |       |
| # r7km3_3: Positive/negative: Storage of CO2 beneath the seabed/underground                                                                                 |                                                                                                                          |       |                        |       |
| Information                                                                                                                                                 | [Type= discrete] [Format=numeric] [Range= 1-7] [Missing=*]                                                               |       |                        |       |
| Statistics [NW/ W]                                                                                                                                          | [Valid=4689 /-] [Invalid=0 /-]                                                                                           |       |                        |       |
| Pre-question                                                                                                                                                | How positive or negative are you about the following measures:                                                           |       |                        |       |
| Literal question                                                                                                                                            | Strengthen focus on capture and storage of CO2 beneath the seabed or underground.                                        |       |                        |       |
| Interviewer's instructions                                                                                                                                  | [Asked if u=2. ]                                                                                                         |       |                        |       |
| Notes                                                                                                                                                       | Satse sterkere på fangst og lagring av CO2 under havbunnen eller jordoverflaten. (Hvor positiv eller negativ er du til f |       |                        |       |
| Value                                                                                                                                                       | Label                                                                                                                    | Cases | Percentage             |       |
| 1                                                                                                                                                           | Very positive                                                                                                            | 98    | <div><div></div></div> | 2.1%  |
| 2                                                                                                                                                           | Positive                                                                                                                 | 256   | <div><div></div></div> | 5.5%  |
| 3                                                                                                                                                           | Somewhat positive                                                                                                        | 252   | <div><div></div></div> | 5.4%  |
| 4                                                                                                                                                           | Neither positive nor negative                                                                                            | 371   | <div><div></div></div> | 7.9%  |
| 5                                                                                                                                                           | Somewhat negative                                                                                                        | 106   | <div><div></div></div> | 2.3%  |
| 6                                                                                                                                                           | Negative                                                                                                                 | 53    | <div><div></div></div> | 1.1%  |
| 7                                                                                                                                                           | Very negative                                                                                                            | 29    | <div><div></div></div> | 0.6%  |

| # r7km3_3: Positive/negative: Storage of CO2 beneath the seabed/underground                                                                                 |                                                                                                                       |       |            |
|-------------------------------------------------------------------------------------------------------------------------------------------------------------|-----------------------------------------------------------------------------------------------------------------------|-------|------------|
| Value                                                                                                                                                       | Label                                                                                                                 | Cases | Percentage |
| 97                                                                                                                                                          | No answer                                                                                                             | 34    | 0.7%       |
| 98                                                                                                                                                          | Not asked                                                                                                             | 3490  | 74.4%      |
| Warning: these figures indicate the number of cases found in the data file. They cannot be interpreted as summary statistics of the population of interest. |                                                                                                                       |       |            |
| # r7km3_4: Positive/negative: Increased funding for renewable energy                                                                                        |                                                                                                                       |       |            |
| Information                                                                                                                                                 | [Type= discrete] [Format=numeric] [Range= 1-7] [Missing=*]                                                            |       |            |
| Statistics [NW/ W]                                                                                                                                          | [Valid=4689 /-] [Invalid=0 /-]                                                                                        |       |            |
| Pre-question                                                                                                                                                | How positive or negative are you about the following measures:                                                        |       |            |
| Literal question                                                                                                                                            | Increase funding for research on and development of renewable energy                                                  |       |            |
| Interviewer's instructions                                                                                                                                  | [Asked if u=2. ]                                                                                                      |       |            |
| Notes                                                                                                                                                       | Øke støtten til forskning på og utbygging av fornybar energi. (Hvor positiv eller negativ er du til følgende tiltak:) |       |            |
| Value                                                                                                                                                       | Label                                                                                                                 | Cases | Percentage |
| 1                                                                                                                                                           | Very positive                                                                                                         | 582   | 12.4%      |
| 2                                                                                                                                                           | Positive                                                                                                              | 407   | 8.7%       |
| 3                                                                                                                                                           | Somewhat positive                                                                                                     | 110   | 2.3%       |
| 4                                                                                                                                                           | Neither positive nor negative                                                                                         | 62    | 1.3%       |
| 5                                                                                                                                                           | Somewhat negative                                                                                                     | 8     | 0.2%       |
| 6                                                                                                                                                           | Negative                                                                                                              | 5     | 0.1%       |
| 7                                                                                                                                                           | Very negative                                                                                                         | 2     | 0.0%       |
| 97                                                                                                                                                          | No answer                                                                                                             | 23    | 0.5%       |
| 98                                                                                                                                                          | Not asked                                                                                                             | 3490  | 74.4%      |
| Warning: these figures indicate the number of cases found in the data file. They cannot be interpreted as summary statistics of the population of interest. |                                                                                                                       |       |            |
| # r7km3_5: Positive/negative: Tighten up fiscal regulations to oil exploration on Norwegian Continental Shelf                                               |                                                                                                                       |       |            |
| Information                                                                                                                                                 | [Type= discrete] [Format=numeric] [Range= 1-7] [Missing=*]                                                            |       |            |
| Statistics [NW/ W]                                                                                                                                          | [Valid=4689 /-] [Invalid=0 /-]                                                                                        |       |            |
| Pre-question                                                                                                                                                | How positive or negative are you about the following measures:                                                        |       |            |
| Literal question                                                                                                                                            | Tighten up the fiscal regulations which apply to oil exploration on the Norwegian Continental Shelf                   |       |            |
| Interviewer's instructions                                                                                                                                  | [Asked if u=2. ]                                                                                                      |       |            |
| Notes                                                                                                                                                       | Skjerpe skattereglene for oljeleting på norsk sokkel (Hvor positiv eller negativ er du til følgende tiltak:)          |       |            |
| Value                                                                                                                                                       | Label                                                                                                                 | Cases | Percentage |
| 1                                                                                                                                                           | Very positive                                                                                                         | 145   | 3.1%       |
| 2                                                                                                                                                           | Positive                                                                                                              | 205   | 4.4%       |
| 3                                                                                                                                                           | Somewhat positive                                                                                                     | 203   | 4.3%       |
| 4                                                                                                                                                           | Neither positive nor negative                                                                                         | 388   | 8.3%       |
| 5                                                                                                                                                           | Somewhat negative                                                                                                     | 96    | 2.0%       |
| 6                                                                                                                                                           | Negative                                                                                                              | 94    | 2.0%       |
| 7                                                                                                                                                           | Very negative                                                                                                         | 36    | 0.8%       |
| 97                                                                                                                                                          | No answer                                                                                                             | 32    | 0.7%       |
| 98                                                                                                                                                          | Not asked                                                                                                             | 3490  | 74.4%      |
| Warning: these figures indicate the number of cases found in the data file. They cannot be interpreted as summary statistics of the population of interest. |                                                                                                                       |       |            |
| # r7km4: Discussion about cars, alternative closest to your view                                                                                            |                                                                                                                       |       |            |
| Information                                                                                                                                                 | [Type= discrete] [Format=numeric] [Range= 1-2] [Missing=*]                                                            |       |            |
| Statistics [NW/ W]                                                                                                                                          | [Valid=4689 /-] [Invalid=0 /-]                                                                                        |       |            |

|                                                                                                                                                             |                                                                                                                                                                                                                                                |       |                               |
|-------------------------------------------------------------------------------------------------------------------------------------------------------------|------------------------------------------------------------------------------------------------------------------------------------------------------------------------------------------------------------------------------------------------|-------|-------------------------------|
| # r7km4: Discussion about cars, alternative closest to your view                                                                                            |                                                                                                                                                                                                                                                |       |                               |
| Pre-question                                                                                                                                                | A proposal that all new personal cars from 2025 should be powered by electricity or hydrogen is currently being debated in the Storting. If the proposal is adopted, it will not be possible to purchase new petrol or diesel cars after 2025. |       |                               |
| Literal question                                                                                                                                            | Which of the following alternatives is closest to your view?                                                                                                                                                                                   |       |                               |
| Interviewer's instructions                                                                                                                                  | [Asked if u=2. ]                                                                                                                                                                                                                               |       |                               |
| Notes                                                                                                                                                       | Partiene på Stortinget diskuterer nå et forslag om at alle nye personbiler fra 2025 skal være elektriske eller bruke h                                                                                                                         |       |                               |
| Value                                                                                                                                                       | Label                                                                                                                                                                                                                                          | Cases | Percentage                    |
| 1                                                                                                                                                           | In 2025 all new personal cars being sold should be powered by electricity or hydrogen.                                                                                                                                                         | 468   | <div><div></div></div> 10.0%  |
| 2                                                                                                                                                           | In 2025 it should still be possible to purchase new personal cars powered by diesel or petrol.                                                                                                                                                 | 702   | <div><div></div></div> 15.0%  |
| 97                                                                                                                                                          | No answer                                                                                                                                                                                                                                      | 29    | <div><div></div></div> 0.6%   |
| 98                                                                                                                                                          | Not asked                                                                                                                                                                                                                                      | 3490  | <div><div></div></div> 74.4%  |
| Warning: these figures indicate the number of cases found in the data file. They cannot be interpreted as summary statistics of the population of interest. |                                                                                                                                                                                                                                                |       |                               |
| # r7km4_comment: Further comments [anonymized]                                                                                                              |                                                                                                                                                                                                                                                |       |                               |
| Information                                                                                                                                                 | [Type= discrete] [Format=character] [Missing=*]                                                                                                                                                                                                |       |                               |
| Statistics [NW/ W]                                                                                                                                          | [Valid=4689 /-] [Invalid=0 /-]                                                                                                                                                                                                                 |       |                               |
| Literal question                                                                                                                                            | Should you have any further comment you may write it here:                                                                                                                                                                                     |       |                               |
| Interviewer's instructions                                                                                                                                  | [Asked if u=2. ]<br><br>[Data withheld for the sake of anonymity]                                                                                                                                                                              |       |                               |
| Value                                                                                                                                                       | Label                                                                                                                                                                                                                                          | Cases | Percentage                    |
|                                                                                                                                                             |                                                                                                                                                                                                                                                | 4689  | <div><div></div></div> 100.0% |
| Warning: these figures indicate the number of cases found in the data file. They cannot be interpreted as summary statistics of the population of interest. |                                                                                                                                                                                                                                                |       |                               |
| # r7km5_1: Statement: Technological innovations will resolve the climate problems                                                                           |                                                                                                                                                                                                                                                |       |                               |
| Information                                                                                                                                                 | [Type= discrete] [Format=numeric] [Range= 1-7] [Missing=*]                                                                                                                                                                                     |       |                               |
| Statistics [NW/ W]                                                                                                                                          | [Valid=4689 /-] [Invalid=0 /-]                                                                                                                                                                                                                 |       |                               |
| Pre-question                                                                                                                                                | Please look at the statements below. To what extent do you agree/disagree with them?                                                                                                                                                           |       |                               |
| Literal question                                                                                                                                            | Technological innovations will resolve the climate problems.                                                                                                                                                                                   |       |                               |
| Interviewer's instructions                                                                                                                                  | [Asked if u=2. ]                                                                                                                                                                                                                               |       |                               |
| Notes                                                                                                                                                       | Teknologiske nyvinninger kommer til å løse klimaproblemene. (Se på utsagnene nedenfor. I hvor stor grad er du enig ell                                                                                                                         |       |                               |
| Value                                                                                                                                                       | Label                                                                                                                                                                                                                                          | Cases | Percentage                    |
| 1                                                                                                                                                           | Strongly agree                                                                                                                                                                                                                                 | 46    | <div><div></div></div> 1.0%   |
| 2                                                                                                                                                           | Agree                                                                                                                                                                                                                                          | 209   | <div><div></div></div> 4.5%   |
| 3                                                                                                                                                           | Somewhat agree                                                                                                                                                                                                                                 | 429   | <div><div></div></div> 9.1%   |
| 4                                                                                                                                                           | Neither agree nor disagree                                                                                                                                                                                                                     | 222   | <div><div></div></div> 4.7%   |
| 5                                                                                                                                                           | Somewhat disagree                                                                                                                                                                                                                              | 150   | <div><div></div></div> 3.2%   |
| 6                                                                                                                                                           | Disagree                                                                                                                                                                                                                                       | 88    | <div><div></div></div> 1.9%   |
| 7                                                                                                                                                           | Strongly disagree                                                                                                                                                                                                                              | 27    | <div><div></div></div> 0.6%   |
| 97                                                                                                                                                          | No answer                                                                                                                                                                                                                                      | 28    | <div><div></div></div> 0.6%   |
| 98                                                                                                                                                          | Not asked                                                                                                                                                                                                                                      | 3490  | <div><div></div></div> 74.4%  |
| Warning: these figures indicate the number of cases found in the data file. They cannot be interpreted as summary statistics of the population of interest. |                                                                                                                                                                                                                                                |       |                               |
| # r7km5_2: Statement: Citizens of rich countries should cut their consumption                                                                               |                                                                                                                                                                                                                                                |       |                               |
| Information                                                                                                                                                 | [Type= discrete] [Format=numeric] [Range= 1-7] [Missing=*]                                                                                                                                                                                     |       |                               |
| Statistics [NW/ W]                                                                                                                                          | [Valid=4689 /-] [Invalid=0 /-]                                                                                                                                                                                                                 |       |                               |



| # r7km5_2: Statement: Citizens of rich countries should cut their consumption                                                                               |                            |                                                                                                                           |             |       |
|-------------------------------------------------------------------------------------------------------------------------------------------------------------|----------------------------|---------------------------------------------------------------------------------------------------------------------------|-------------|-------|
| <b>Pre-question</b>                                                                                                                                         |                            | Please look at the statements below. To what extent do you agree/disagree with them?                                      |             |       |
| <b>Literal question</b>                                                                                                                                     |                            | The citizens of rich countries like Norway should cut their consumption as part of the solution to the climate challenge. |             |       |
| <b>Interviewer's instructions</b>                                                                                                                           |                            | [Asked if u=2. ]                                                                                                          |             |       |
| <b>Notes</b>                                                                                                                                                |                            | Innbyggere i rike land som Norge bør redusere forbruket sitt som en del av løsningen på klimautfordringen. (Se på ut      |             |       |
| Value                                                                                                                                                       | Label                      | Cases                                                                                                                     | Percentage  |       |
| 1                                                                                                                                                           | Strongly agree             | 220                                                                                                                       | <div></div> | 4.7%  |
| 2                                                                                                                                                           | Agree                      | 343                                                                                                                       | <div></div> | 7.3%  |
| 3                                                                                                                                                           | Somewhat agree             | 339                                                                                                                       | <div></div> | 7.2%  |
| 4                                                                                                                                                           | Neither agree nor disagree | 109                                                                                                                       | <div></div> | 2.3%  |
| 5                                                                                                                                                           | Somewhat disagree          | 80                                                                                                                        | <div></div> | 1.7%  |
| 6                                                                                                                                                           | Disagree                   | 51                                                                                                                        | <div></div> | 1.1%  |
| 7                                                                                                                                                           | Strongly disagree          | 34                                                                                                                        | <div></div> | 0.7%  |
| 97                                                                                                                                                          | No answer                  | 23                                                                                                                        | <div></div> | 0.5%  |
| 98                                                                                                                                                          | Not asked                  | 3490                                                                                                                      | <div></div> | 74.4% |
| Warning: these figures indicate the number of cases found in the data file. They cannot be interpreted as summary statistics of the population of interest. |                            |                                                                                                                           |             |       |

| # r7km6: To what extent is it possible to prevent harmful climate change, statement closest to your viewpoint                                               |                                                                                                                                                                                                                                                                                                        |       |            |
|-------------------------------------------------------------------------------------------------------------------------------------------------------------|--------------------------------------------------------------------------------------------------------------------------------------------------------------------------------------------------------------------------------------------------------------------------------------------------------|-------|------------|
| Information                                                                                                                                                 | [Type= discrete] [Format=numeric] [Range= 1-4] [Missing=*]                                                                                                                                                                                                                                             |       |            |
| Statistics [NW/ W]                                                                                                                                          | [Valid=4689 /-] [Invalid=0 /-]                                                                                                                                                                                                                                                                         |       |            |
| Pre-question                                                                                                                                                | Let us assume that climate change can be a major problem for the world in the future if nothing is done about it. To what extent do you think it is possible to prevent harmful climate change?                                                                                                        |       |            |
| Literal question                                                                                                                                            | Choose the statement that best matches your viewpoint:                                                                                                                                                                                                                                                 |       |            |
| Interviewer's instructions                                                                                                                                  | [Asked if u=2. ]                                                                                                                                                                                                                                                                                       |       |            |
| Notes                                                                                                                                                       | La oss forutsette at klimaendringer kan bli et stort problem for verden i fremtiden dersom ingenting gjøres med dem. I h                                                                                                                                                                               |       |            |
| Value                                                                                                                                                       | Label                                                                                                                                                                                                                                                                                                  | Cases | Percentage |
| 1                                                                                                                                                           | It is impossible to prevent harmful climate change.                                                                                                                                                                                                                                                    | 106   | 2.3%       |
| 2                                                                                                                                                           | It is possible, but very difficult, to prevent harmful climate change.                                                                                                                                                                                                                                 | 812   | 17.3%      |
| 3                                                                                                                                                           | It is possible and entirely realistic to prevent harmful climate change.                                                                                                                                                                                                                               | 245   | 5.2%       |
| 4                                                                                                                                                           | It is easy to prevent harmful climate change.                                                                                                                                                                                                                                                          | 5     | 0.1%       |
| 97                                                                                                                                                          | No answer                                                                                                                                                                                                                                                                                              | 31    | 0.7%       |
| 98                                                                                                                                                          | Not asked                                                                                                                                                                                                                                                                                              | 3490  | 74.4%      |
| Warning: these figures indicate the number of cases found in the data file. They cannot be interpreted as summary statistics of the population of interest. |                                                                                                                                                                                                                                                                                                        |       |            |
| # r7km7_1: How should your municipal authority prioritise the areas for food production next ten years: Housing                                             |                                                                                                                                                                                                                                                                                                        |       |            |
| Information                                                                                                                                                 | [Type= discrete] [Format=numeric] [Missing=*]                                                                                                                                                                                                                                                          |       |            |
| Statistics [NW/ W]                                                                                                                                          | [Valid=4022 /-] [Invalid=667 /-]                                                                                                                                                                                                                                                                       |       |            |
| Pre-question                                                                                                                                                | Politicians must often choose whether areas that can be used to produce food should be used for other necessary purposes. How do you feel your municipal authority should prioritise the use of such areas for the next ten years? Please rank up to three alternatives where 1 is the most important: |       |            |
| Literal question                                                                                                                                            | Housing                                                                                                                                                                                                                                                                                                |       |            |
| Interviewer's instructions                                                                                                                                  | [Asked if u=2. Respondent are asked to select three options in R7KM7, and rank these three from 1 -3.]                                                                                                                                                                                                 |       |            |
| Notes                                                                                                                                                       | Boliger (Politikerne må ofte velge om arealer som kan benyttes til matproduksjon skal brukes til andre nødvendige form                                                                                                                                                                                 |       |            |
| Value                                                                                                                                                       | Label                                                                                                                                                                                                                                                                                                  | Cases | Percentage |
| 1                                                                                                                                                           |                                                                                                                                                                                                                                                                                                        | 151   | 3.8%       |
| 2                                                                                                                                                           |                                                                                                                                                                                                                                                                                                        | 194   | 4.8%       |
| 3                                                                                                                                                           |                                                                                                                                                                                                                                                                                                        | 187   | 4.6%       |
| 97                                                                                                                                                          | No answer                                                                                                                                                                                                                                                                                              | 0     |            |
| 98                                                                                                                                                          | Not asked                                                                                                                                                                                                                                                                                              | 3490  | 86.8%      |
| Sysmiss                                                                                                                                                     |                                                                                                                                                                                                                                                                                                        | 667   |            |
| Warning: these figures indicate the number of cases found in the data file. They cannot be interpreted as summary statistics of the population of interest. |                                                                                                                                                                                                                                                                                                        |       |            |
| # r7km7_2: How should your municipal authority prioritise the areas for food production next ten years: Roads                                               |                                                                                                                                                                                                                                                                                                        |       |            |
| Information                                                                                                                                                 | [Type= discrete] [Format=numeric] [Missing=*]                                                                                                                                                                                                                                                          |       |            |
| Statistics [NW/ W]                                                                                                                                          | [Valid=3838 /-] [Invalid=851 /-]                                                                                                                                                                                                                                                                       |       |            |
| Pre-question                                                                                                                                                | Politicians must often choose whether areas that can be used to produce food should be used for other necessary purposes. How do you feel your municipal authority should prioritise the use of such areas for the next ten years? Please rank up to three alternatives where 1 is the most important: |       |            |
| Literal question                                                                                                                                            | Roads                                                                                                                                                                                                                                                                                                  |       |            |
| Interviewer's instructions                                                                                                                                  | [Asked if u=2. Respondent are asked to select three options in R7KM7, and rank these three from 1 -3.]                                                                                                                                                                                                 |       |            |
| Notes                                                                                                                                                       | Vei (Politikerne må ofte velge om arealer som kan benyttes til matproduksjon skal brukes til andre nødvendige formål.                                                                                                                                                                                  |       |            |
| Value                                                                                                                                                       | Label                                                                                                                                                                                                                                                                                                  | Cases | Percentage |
| 1                                                                                                                                                           |                                                                                                                                                                                                                                                                                                        | 71    | 1.8%       |

### # r7km7\_2: How should your municipal authority prioritise the areas for food production next ten years: Roads

| Value   | Label     | Cases | Percentage |
|---------|-----------|-------|------------|
| 2       |           | 111   | 2.9%       |
| 3       |           | 166   | 4.3%       |
| 97      | No answer | 0     |            |
| 98      | Not asked | 3490  | 90.9%      |
| Sysmiss |           | 851   |            |

Warning: these figures indicate the number of cases found in the data file. They cannot be interpreted as summary statistics of the population of interest.

### # r7km7\_3: How should your municipal authority prioritise the areas for food production next ten years: Food production

|                                   |                                                                                                                                                                                                                                                                                                        |
|-----------------------------------|--------------------------------------------------------------------------------------------------------------------------------------------------------------------------------------------------------------------------------------------------------------------------------------------------------|
| <b>Information</b>                | [Type= discrete] [Format=numeric] [Missing=*]                                                                                                                                                                                                                                                          |
| <b>Statistics [NW/ W]</b>         | [Valid=4253 /-] [Invalid=436 /-]                                                                                                                                                                                                                                                                       |
| <b>Pre-question</b>               | Politicians must often choose whether areas that can be used to produce food should be used for other necessary purposes. How do you feel your municipal authority should prioritise the use of such areas for the next ten years? Please rank up to three alternatives where 1 is the most important: |
| <b>Literal question</b>           | Food production                                                                                                                                                                                                                                                                                        |
| <b>Interviewer's instructions</b> | [Asked if u=2. Respondent are asked to select three options in R7KM7, and rank these three from 1 -3.]                                                                                                                                                                                                 |
| <b>Notes</b>                      | Matproduksjon (Politikerne må ofte velge om arealer som kan benyttes til matproduksjon skal brukes til andre nødvendige                                                                                                                                                                                |

| Value   | Label     | Cases | Percentage |
|---------|-----------|-------|------------|
| 1       |           | 541   | 12.7%      |
| 2       |           | 125   | 2.9%       |
| 3       |           | 97    | 2.3%       |
| 97      | No answer | 0     |            |
| 98      | Not asked | 3490  | 82.1%      |
| Sysmiss |           | 436   |            |

Warning: these figures indicate the number of cases found in the data file. They cannot be interpreted as summary statistics of the population of interest.

### # r7km7\_4: How should your municipal authority prioritise the areas for food production next ten years: Railway/ Underground/Tramway

|                                   |                                                                                                                                                                                                                                                                                                        |
|-----------------------------------|--------------------------------------------------------------------------------------------------------------------------------------------------------------------------------------------------------------------------------------------------------------------------------------------------------|
| <b>Information</b>                | [Type= discrete] [Format=numeric] [Missing=*]                                                                                                                                                                                                                                                          |
| <b>Statistics [NW/ W]</b>         | [Valid=4031 /-] [Invalid=658 /-]                                                                                                                                                                                                                                                                       |
| <b>Pre-question</b>               | Politicians must often choose whether areas that can be used to produce food should be used for other necessary purposes. How do you feel your municipal authority should prioritise the use of such areas for the next ten years? Please rank up to three alternatives where 1 is the most important: |
| <b>Literal question</b>           | Railway/Underground/Tramway etc.                                                                                                                                                                                                                                                                       |
| <b>Interviewer's instructions</b> | [Asked if u=2. Respondent are asked to select three options in R7KM7, and rank these three from 1 -3.]                                                                                                                                                                                                 |
| <b>Notes</b>                      | Jernbane/T-bane/bybane osv. (Politikerne må ofte velge om arealer som kan benyttes til matproduksjon skal brukes til and                                                                                                                                                                               |

| Value   | Label     | Cases | Percentage |
|---------|-----------|-------|------------|
| 1       |           | 150   | 3.7%       |
| 2       |           | 226   | 5.6%       |
| 3       |           | 165   | 4.1%       |
| 97      | No answer | 0     |            |
| 98      | Not asked | 3490  | 86.6%      |
| Sysmiss |           | 658   |            |

Warning: these figures indicate the number of cases found in the data file. They cannot be interpreted as summary statistics of the population of interest.

### # r7km7\_5: How should your municipal authority prioritise the areas for food production next ten years: Commercial activity

|                                   |                                                                                                                                                                                                                                                                                                           |
|-----------------------------------|-----------------------------------------------------------------------------------------------------------------------------------------------------------------------------------------------------------------------------------------------------------------------------------------------------------|
| <b>Information</b>                | [Type= discrete] [Format=numeric] [Missing=*]                                                                                                                                                                                                                                                             |
| <b>Statistics [NW/ W]</b>         | [Valid=3919 /-] [Invalid=770 /-]                                                                                                                                                                                                                                                                          |
| <b>Pre-question</b>               | Politicians must often choose whether areas that can be used to produce food should be used for other necessary purposes. How do you feel your municipal authority should prioritise the use of such areas for the next ten years?<br>Please rank up to three alternatives where 1 is the most important: |
| <b>Literal question</b>           | Commercial activity                                                                                                                                                                                                                                                                                       |
| <b>Interviewer's instructions</b> | [Asked if u=2. Respondent are asked to select three options in R7KM7, and rank these three from 1 -3.]                                                                                                                                                                                                    |
| <b>Notes</b>                      | Næringsvirksomhet (Politikerne må ofte velge om arealer som kan benyttes til matproduksjon skal brukes til andre nødve                                                                                                                                                                                    |

| Value   | Label     | Cases | Percentage |
|---------|-----------|-------|------------|
| 1       |           | 89    | 2.3%       |
| 2       |           | 173   | 4.4%       |
| 3       |           | 167   | 4.3%       |
| 97      | No answer | 0     |            |
| 98      | Not asked | 3490  | 89.1%      |
| Sysmiss |           | 770   |            |

Warning: these figures indicate the number of cases found in the data file. They cannot be interpreted as summary statistics of the population of interest.

### # r7km7\_6: How should your municipal authority prioritise the areas for food production next ten years: Public buildings

|                                   |                                                                                                                                                                                                                                                                                                           |
|-----------------------------------|-----------------------------------------------------------------------------------------------------------------------------------------------------------------------------------------------------------------------------------------------------------------------------------------------------------|
| <b>Information</b>                | [Type= discrete] [Format=numeric] [Missing=*]                                                                                                                                                                                                                                                             |
| <b>Statistics [NW/ W]</b>         | [Valid=4103 /-] [Invalid=586 /-]                                                                                                                                                                                                                                                                          |
| <b>Pre-question</b>               | Politicians must often choose whether areas that can be used to produce food should be used for other necessary purposes. How do you feel your municipal authority should prioritise the use of such areas for the next ten years?<br>Please rank up to three alternatives where 1 is the most important: |
| <b>Literal question</b>           | Public buildings: School, sports etc.                                                                                                                                                                                                                                                                     |
| <b>Interviewer's instructions</b> | [Asked if u=2. Respondent are asked to select three options in R7KM7, and rank these three from 1 -3.]                                                                                                                                                                                                    |
| <b>Notes</b>                      | Offentlige bygg: Skole, idrett osv (Politikerne må ofte velge om arealer som kan benyttes til matproduksjon skal brukes                                                                                                                                                                                   |

| Value   | Label     | Cases | Percentage |
|---------|-----------|-------|------------|
| 1       |           | 123   | 3.0%       |
| 2       |           | 240   | 5.8%       |
| 3       |           | 250   | 6.1%       |
| 97      | No answer | 0     |            |
| 98      | Not asked | 3490  | 85.1%      |
| Sysmiss |           | 586   |            |

Warning: these figures indicate the number of cases found in the data file. They cannot be interpreted as summary statistics of the population of interest.

### # r7km8: Would install solar panels if authorities cover half the cost

|                                   |                                                                                                                           |
|-----------------------------------|---------------------------------------------------------------------------------------------------------------------------|
| <b>Information</b>                | [Type= discrete] [Format=numeric] [Range= 1-4] [Missing=*]                                                                |
| <b>Statistics [NW/ W]</b>         | [Valid=4689 /-] [Invalid=0 /-]                                                                                            |
| <b>Literal question</b>           | Would you install solar panels/solar collectors if you could receive a grant from the authorities to cover half the cost? |
| <b>Interviewer's instructions</b> | [Asked if u=2. ]                                                                                                          |
| <b>Notes</b>                      | Ville du installert solcellepanel/solfangere dersom du fikk offentlig støtte til å dekke halvparten av kostnadene?        |

| Value | Label | Cases | Percentage |
|-------|-------|-------|------------|
| 1     | Yes   | 645   | 13.8%      |
| 2     | No    | 203   | 4.3%       |

| # r7km8: Would install solar panels if authorities cover half the cost                                                                                      |                                                                                                                                                                                      |       |            |
|-------------------------------------------------------------------------------------------------------------------------------------------------------------|--------------------------------------------------------------------------------------------------------------------------------------------------------------------------------------|-------|------------|
| Value                                                                                                                                                       | Label                                                                                                                                                                                | Cases | Percentage |
| 3                                                                                                                                                           | I have already installed solar panels/solar collectors                                                                                                                               | 10    | 0.2%       |
| 4                                                                                                                                                           | It is not possible for me to install solar panels/solar collectors in practice                                                                                                       | 304   | 6.5%       |
| 97                                                                                                                                                          | No answer                                                                                                                                                                            | 37    | 0.8%       |
| 98                                                                                                                                                          | Not asked                                                                                                                                                                            | 3490  | 74.4%      |
| Warning: these figures indicate the number of cases found in the data file. They cannot be interpreted as summary statistics of the population of interest. |                                                                                                                                                                                      |       |            |
| # r7km8_comment: Further comments [anonymized]                                                                                                              |                                                                                                                                                                                      |       |            |
| Information                                                                                                                                                 | [Type= discrete] [Format=character] [Missing=*]                                                                                                                                      |       |            |
| Statistics [NW/ W]                                                                                                                                          | [Valid=4689 /-] [Invalid=0 /-]                                                                                                                                                       |       |            |
| Literal question                                                                                                                                            | Should you have any further comment you may write it here:                                                                                                                           |       |            |
| Interviewer's instructions                                                                                                                                  | [Asked if u=2. ]<br><br>[Data withheld for the sake of anonymity]                                                                                                                    |       |            |
| Value                                                                                                                                                       | Label                                                                                                                                                                                | Cases | Percentage |
|                                                                                                                                                             |                                                                                                                                                                                      | 4689  | 100.0%     |
| Warning: these figures indicate the number of cases found in the data file. They cannot be interpreted as summary statistics of the population of interest. |                                                                                                                                                                                      |       |            |
| # r7ran3: [Randomizes if u=2. ]                                                                                                                             |                                                                                                                                                                                      |       |            |
| Information                                                                                                                                                 | [Type= discrete] [Format=numeric] [Range= 1-2] [Missing=*]                                                                                                                           |       |            |
| Statistics [NW/ W]                                                                                                                                          | [Valid=1182 /-] [Invalid=3507 /-]                                                                                                                                                    |       |            |
| Interviewer's instructions                                                                                                                                  | [Randomizes if u=2. ]                                                                                                                                                                |       |            |
| Value                                                                                                                                                       | Label                                                                                                                                                                                | Cases | Percentage |
| 1                                                                                                                                                           | 1                                                                                                                                                                                    | 578   | 48.9%      |
| 2                                                                                                                                                           | 2                                                                                                                                                                                    | 604   | 51.1%      |
| Sysmiss                                                                                                                                                     |                                                                                                                                                                                      | 3507  |            |
| Warning: these figures indicate the number of cases found in the data file. They cannot be interpreted as summary statistics of the population of interest. |                                                                                                                                                                                      |       |            |
| # r7pilotkm1_10_1_1: Balance between using nature and desire not to harm it                                                                                 |                                                                                                                                                                                      |       |            |
| Information                                                                                                                                                 | [Type= discrete] [Format=numeric] [Range= 1-7] [Missing=*]                                                                                                                           |       |            |
| Statistics [NW/ W]                                                                                                                                          | [Valid=4689 /-] [Invalid=0 /-]                                                                                                                                                       |       |            |
| Pre-question                                                                                                                                                | Our politicians often face difficult decisions. This certainly applies to how to achieve a balance in terms of the needs of society to use nature and the desire not to harm nature. |       |            |
| Literal question                                                                                                                                            | Considering the current situation in Norway, how do you feel the balance is today?                                                                                                   |       |            |
| Interviewer's instructions                                                                                                                                  | [Asked if u=2. ]                                                                                                                                                                     |       |            |
| Value                                                                                                                                                       | Label                                                                                                                                                                                | Cases | Percentage |
| 1                                                                                                                                                           | Too much emphasis is placed on consideration to nature                                                                                                                               | 16    | 0.3%       |
| 2                                                                                                                                                           | 2                                                                                                                                                                                    | 52    | 1.1%       |
| 3                                                                                                                                                           | 3                                                                                                                                                                                    | 130   | 2.8%       |
| 4                                                                                                                                                           | Good balance                                                                                                                                                                         | 452   | 9.6%       |
| 5                                                                                                                                                           | 5                                                                                                                                                                                    | 240   | 5.1%       |
| 6                                                                                                                                                           | 6                                                                                                                                                                                    | 173   | 3.7%       |
| 7                                                                                                                                                           | Too much emphasis is placed on consideration to society                                                                                                                              | 67    | 1.4%       |
| 97                                                                                                                                                          | No answer                                                                                                                                                                            | 69    | 1.5%       |
| 98                                                                                                                                                          | Not asked                                                                                                                                                                            | 3490  | 74.4%      |
| Warning: these figures indicate the number of cases found in the data file. They cannot be interpreted as summary statistics of the population of interest. |                                                                                                                                                                                      |       |            |

| # r7pilotkm1_10_2: How should politicians prioritise between consideration to nature and to society                                                         |                                                                                                                              |       |                               |
|-------------------------------------------------------------------------------------------------------------------------------------------------------------|------------------------------------------------------------------------------------------------------------------------------|-------|-------------------------------|
| Information                                                                                                                                                 | [Type= discrete] [Format=numeric] [Range= 1-3] [Missing=*]                                                                   |       |                               |
| Statistics [NW/ W]                                                                                                                                          | [Valid=4689 /-] [Invalid=0 /-]                                                                                               |       |                               |
| Literal question                                                                                                                                            | How do you feel politicians should prioritise between consideration to nature and to society.                                |       |                               |
| Interviewer's instructions                                                                                                                                  | [Asked if u=2 and ran3=1. ]                                                                                                  |       |                               |
| Notes                                                                                                                                                       | Hvordan mener du at politikerne bør prioritere mellom naturhensyn og samfunnshensyn?                                         |       |                               |
| Value                                                                                                                                                       | Label                                                                                                                        | Cases | Percentage                    |
| 1                                                                                                                                                           | Consideration to nature should in general go before social considerations.                                                   | 104   | <div><div></div></div> 2.2%   |
| 2                                                                                                                                                           | Harming nature to a lesser degree can be acceptable, but only when absolutely necessary social considerations indicate this. | 433   | <div><div></div></div> 9.2%   |
| 3                                                                                                                                                           | Harming nature can be accepted, but only when absolutely necessary considerations for society indicate this.                 | 35    | <div><div></div></div> 0.7%   |
| 97                                                                                                                                                          | No answer                                                                                                                    | 6     | <div><div></div></div> 0.1%   |
| 98                                                                                                                                                          | Not asked                                                                                                                    | 4111  | <div><div></div></div> 87.7%  |
| Warning: these figures indicate the number of cases found in the data file. They cannot be interpreted as summary statistics of the population of interest. |                                                                                                                              |       |                               |
| # r7pilotkm1_10_2_flipped: How should politicians prioritise between consideration to nature and to society                                                 |                                                                                                                              |       |                               |
| Information                                                                                                                                                 | [Type= discrete] [Format=numeric] [Range= 1-3] [Missing=*]                                                                   |       |                               |
| Statistics [NW/ W]                                                                                                                                          | [Valid=4689 /-] [Invalid=0 /-]                                                                                               |       |                               |
| Literal question                                                                                                                                            | How do you feel politicians should prioritise between consideration to nature and to society.                                |       |                               |
| Interviewer's instructions                                                                                                                                  | [Asked if u=2 and ran3=2. ]<br><br>[Compared to r7pilotkm1_10_2, scale flipped]                                              |       |                               |
| Notes                                                                                                                                                       | Hvordan mener du at politikerne bør prioritere mellom naturhensyn og samfunnshensyn?                                         |       |                               |
| Value                                                                                                                                                       | Label                                                                                                                        | Cases | Percentage                    |
| 1                                                                                                                                                           | Harming nature can be accepted, but only when absolutely necessary considerations for society indicate this.                 | 48    | <div><div></div></div> 1.0%   |
| 2                                                                                                                                                           | Harming nature to a lesser degree can be acceptable, but only when absolutely necessary social considerations indicate this. | 423   | <div><div></div></div> 9.0%   |
| 3                                                                                                                                                           | Consideration to nature should in general go before social considerations.                                                   | 123   | <div><div></div></div> 2.6%   |
| 97                                                                                                                                                          | No answer                                                                                                                    | 10    | <div><div></div></div> 0.2%   |
| 98                                                                                                                                                          | Not asked                                                                                                                    | 4085  | <div><div></div></div> 87.1%  |
| Warning: these figures indicate the number of cases found in the data file. They cannot be interpreted as summary statistics of the population of interest. |                                                                                                                              |       |                               |
| # r7pilotkm1_comment: Further comments [anonymized]                                                                                                         |                                                                                                                              |       |                               |
| Information                                                                                                                                                 | [Type= discrete] [Format=character] [Missing=*]                                                                              |       |                               |
| Statistics [NW/ W]                                                                                                                                          | [Valid=4689 /-] [Invalid=0 /-]                                                                                               |       |                               |
| Literal question                                                                                                                                            | You can write any comments you might have here:                                                                              |       |                               |
| Interviewer's instructions                                                                                                                                  | [Asked if u=2. ]<br><br>[Data withheld for the sake of anonymity]                                                            |       |                               |
| Value                                                                                                                                                       | Label                                                                                                                        | Cases | Percentage                    |
|                                                                                                                                                             |                                                                                                                              | 4689  | <div><div></div></div> 100.0% |
| Warning: these figures indicate the number of cases found in the data file. They cannot be interpreted as summary statistics of the population of interest. |                                                                                                                              |       |                               |
| # r7ran4: [Randomizes if u=2. ]                                                                                                                             |                                                                                                                              |       |                               |
| Information                                                                                                                                                 | [Type= discrete] [Format=numeric] [Range= 1-5] [Missing=*]                                                                   |       |                               |
| Statistics [NW/ W]                                                                                                                                          | [Valid=1182 /-] [Invalid=3507 /-]                                                                                            |       |                               |

| # r7ran4: [Randomizes if u=2. ]                                                                                                                                    |                                                                                           |                                                                                                                                                                                                                                                                                                                                                     |                              |
|--------------------------------------------------------------------------------------------------------------------------------------------------------------------|-------------------------------------------------------------------------------------------|-----------------------------------------------------------------------------------------------------------------------------------------------------------------------------------------------------------------------------------------------------------------------------------------------------------------------------------------------------|------------------------------|
| <b>Interviewer's instructions</b>                                                                                                                                  |                                                                                           | [Randomizes if u=2. ]                                                                                                                                                                                                                                                                                                                               |                              |
| Value                                                                                                                                                              | Label                                                                                     | Cases                                                                                                                                                                                                                                                                                                                                               | Percentage                   |
| 1                                                                                                                                                                  | 1                                                                                         | 262                                                                                                                                                                                                                                                                                                                                                 | <div><div></div></div> 22.2% |
| 2                                                                                                                                                                  | 2                                                                                         | 218                                                                                                                                                                                                                                                                                                                                                 | <div><div></div></div> 18.4% |
| 3                                                                                                                                                                  | 3                                                                                         | 229                                                                                                                                                                                                                                                                                                                                                 | <div><div></div></div> 19.4% |
| 4                                                                                                                                                                  | 4                                                                                         | 238                                                                                                                                                                                                                                                                                                                                                 | <div><div></div></div> 20.1% |
| 5                                                                                                                                                                  | 5                                                                                         | 235                                                                                                                                                                                                                                                                                                                                                 | <div><div></div></div> 19.9% |
| Sysmiss                                                                                                                                                            |                                                                                           | 3507                                                                                                                                                                                                                                                                                                                                                |                              |
| <i>Warning: these figures indicate the number of cases found in the data file. They cannot be interpreted as summary statistics of the population of interest.</i> |                                                                                           |                                                                                                                                                                                                                                                                                                                                                     |                              |
| # r7pilotkm2_s1: Start oil production or let the oil remain in LoVeSe: Opponent's argument                                                                         |                                                                                           |                                                                                                                                                                                                                                                                                                                                                     |                              |
| <b>Information</b>                                                                                                                                                 |                                                                                           | [Type= discrete] [Format=numeric] [Range= 1-2] [Missing=*]                                                                                                                                                                                                                                                                                          |                              |
| <b>Statistics [NW/ W]</b>                                                                                                                                          |                                                                                           | [Valid=4689 /-] [Invalid=0 /-]                                                                                                                                                                                                                                                                                                                      |                              |
| <b>Pre-question</b>                                                                                                                                                |                                                                                           | In the debate about oil and gas extraction in the area off Lofoten, Vesterålen and Senja opponents argue that an accident causing a major oil spillage will threaten the North Atlantic cod stocks that breed in this area, and that based on climate considerations and international obligations the speed of the extraction must be slowed down. |                              |
| <b>Literal question</b>                                                                                                                                            |                                                                                           | What do you think, should we start oil and gas production in the area off Lofoten, Vesterålen and Senja or should we let the oil and gas in this area remain where it is.                                                                                                                                                                           |                              |
| <b>Interviewer's instructions</b>                                                                                                                                  |                                                                                           | [Asked if u=2, ran4=1 AND ran40=4. ]                                                                                                                                                                                                                                                                                                                |                              |
| <b>Notes</b>                                                                                                                                                       |                                                                                           | I debatten rundt olje- og gassutvinning i området utenfor Lofoten, Vesterålen og Senja argumenterer motstanderne for at                                                                                                                                                                                                                             |                              |
| Value                                                                                                                                                              | Label                                                                                     | Cases                                                                                                                                                                                                                                                                                                                                               | Percentage                   |
| 1                                                                                                                                                                  | We should start oil and gas production in the area off Lofoten, Vesterålen and Senja.     | 21                                                                                                                                                                                                                                                                                                                                                  | <div><div></div></div> 0.4%  |
| 2                                                                                                                                                                  | We should not start oil and gas production in the area off Lofoten, Vesterålen and Senja. | 33                                                                                                                                                                                                                                                                                                                                                  | <div><div></div></div> 0.7%  |
| 97                                                                                                                                                                 | No answer                                                                                 | 2                                                                                                                                                                                                                                                                                                                                                   | <div><div></div></div> 0.0%  |
| 98                                                                                                                                                                 | Not asked                                                                                 | 4633                                                                                                                                                                                                                                                                                                                                                | <div><div></div></div> 98.8% |
| <i>Warning: these figures indicate the number of cases found in the data file. They cannot be interpreted as summary statistics of the population of interest.</i> |                                                                                           |                                                                                                                                                                                                                                                                                                                                                     |                              |
| # r7pilotkm2_s2: Start oil production or let the oil remain in LoVeSe: Proponent's argument                                                                        |                                                                                           |                                                                                                                                                                                                                                                                                                                                                     |                              |
| <b>Information</b>                                                                                                                                                 |                                                                                           | [Type= discrete] [Format=numeric] [Range= 1-2] [Missing=*]                                                                                                                                                                                                                                                                                          |                              |
| <b>Statistics [NW/ W]</b>                                                                                                                                          |                                                                                           | [Valid=4689 /-] [Invalid=0 /-]                                                                                                                                                                                                                                                                                                                      |                              |
| <b>Pre-question</b>                                                                                                                                                |                                                                                           | In the debate about oil and gas extraction in the area off Lofoten, Vesterålen and Senja the proponents argue that the oil and gas extraction is important for workplaces, and that security surrounding the oil industry today is excellent and the chance of an accident causing a major spillages is minimal.                                    |                              |
| <b>Literal question</b>                                                                                                                                            |                                                                                           | What do you think, should we start oil and gas production in the area off Lofoten, Vesterålen and Senja or should we let the oil and gas in this area remain where it is.                                                                                                                                                                           |                              |
| <b>Interviewer's instructions</b>                                                                                                                                  |                                                                                           | [Asked if u=2, ran4=2 AND ran40=4. ]                                                                                                                                                                                                                                                                                                                |                              |
| <b>Notes</b>                                                                                                                                                       |                                                                                           | I debatten rundt olje- og gassutvinning i området utenfor Lofoten, Vesterålen og Senja argumenterer forkjemperne med at                                                                                                                                                                                                                             |                              |
| Value                                                                                                                                                              | Label                                                                                     | Cases                                                                                                                                                                                                                                                                                                                                               | Percentage                   |
| 1                                                                                                                                                                  | We should start oil and gas production in the area off Lofoten, Vesterålen and Senja.     | 25                                                                                                                                                                                                                                                                                                                                                  | <div><div></div></div> 0.5%  |
| 2                                                                                                                                                                  | We should not start oil and gas production in the area off Lofoten, Vesterålen and Senja. | 25                                                                                                                                                                                                                                                                                                                                                  | <div><div></div></div> 0.5%  |
| 97                                                                                                                                                                 | No answer                                                                                 | 3                                                                                                                                                                                                                                                                                                                                                   | <div><div></div></div> 0.1%  |
| 98                                                                                                                                                                 | Not asked                                                                                 | 4636                                                                                                                                                                                                                                                                                                                                                | <div><div></div></div> 98.9% |
| <i>Warning: these figures indicate the number of cases found in the data file. They cannot be interpreted as summary statistics of the population of interest.</i> |                                                                                           |                                                                                                                                                                                                                                                                                                                                                     |                              |

| # r7pilotkm2_s3: Start oil production or let the oil remain in LoVeSe: Opponent's argument, then proponent's argument                                       |                                                                                                                                                                                                                                                                                                                                                                                                                                                                                                                                                                                          |       |            |
|-------------------------------------------------------------------------------------------------------------------------------------------------------------|------------------------------------------------------------------------------------------------------------------------------------------------------------------------------------------------------------------------------------------------------------------------------------------------------------------------------------------------------------------------------------------------------------------------------------------------------------------------------------------------------------------------------------------------------------------------------------------|-------|------------|
| Information                                                                                                                                                 | [Type= discrete] [Format=numeric] [Range= 1-2] [Missing=*]                                                                                                                                                                                                                                                                                                                                                                                                                                                                                                                               |       |            |
| Statistics [NW/ W]                                                                                                                                          | [Valid=4689 /-] [Invalid=0 /-]                                                                                                                                                                                                                                                                                                                                                                                                                                                                                                                                                           |       |            |
| Pre-question                                                                                                                                                | In the debate about oil and gas extraction in the area off Lofoten, Vesterålen and Senja opponents argue that an accident causing a major oil spillage will threaten the North Atlantic cod stocks that breed in this area, and that based on climate considerations and international obligations the speed of the extraction must be slowed down. However, the the proponents argue that the oil and gas extraction is important for workplaces, and that security surrounding the oil industry today is excellent and the chance of an accident causing a major spillages is minimal. |       |            |
| Literal question                                                                                                                                            | What do you think, should we start oil and gas production in the area off Lofoten, Vesterålen and Senja or should we let the oil and gas in this area remain where it is.                                                                                                                                                                                                                                                                                                                                                                                                                |       |            |
| Interviewer's instructions                                                                                                                                  | [Asked if u=2, ran4=3 AND ran40=4. ]                                                                                                                                                                                                                                                                                                                                                                                                                                                                                                                                                     |       |            |
| Notes                                                                                                                                                       | I debatten rundt olje- og gassutvinning i området utenfor Lofoten, Vesterålen og Senja argumenterer motstanderne for at                                                                                                                                                                                                                                                                                                                                                                                                                                                                  |       |            |
| Value                                                                                                                                                       | Label                                                                                                                                                                                                                                                                                                                                                                                                                                                                                                                                                                                    | Cases | Percentage |
| 1                                                                                                                                                           | We should start oil and gas production in the area off Lofoten, Vesterålen and Senja.                                                                                                                                                                                                                                                                                                                                                                                                                                                                                                    | 26    | 0.6%       |
| 2                                                                                                                                                           | We should not start oil and gas production in the area off Lofoten, Vesterålen and Senja.                                                                                                                                                                                                                                                                                                                                                                                                                                                                                                | 27    | 0.6%       |
| 97                                                                                                                                                          | No answer                                                                                                                                                                                                                                                                                                                                                                                                                                                                                                                                                                                | 3     | 0.1%       |
| 98                                                                                                                                                          | Not asked                                                                                                                                                                                                                                                                                                                                                                                                                                                                                                                                                                                | 4633  | 98.8%      |
| Warning: these figures indicate the number of cases found in the data file. They cannot be interpreted as summary statistics of the population of interest. |                                                                                                                                                                                                                                                                                                                                                                                                                                                                                                                                                                                          |       |            |
| # r7pilotkm2_s4: Start oil production or let the oil remain in LoVeSe: Proponent's argument, then opponent's argument                                       |                                                                                                                                                                                                                                                                                                                                                                                                                                                                                                                                                                                          |       |            |
| Information                                                                                                                                                 | [Type= discrete] [Format=numeric] [Range= 1-2] [Missing=*]                                                                                                                                                                                                                                                                                                                                                                                                                                                                                                                               |       |            |
| Statistics [NW/ W]                                                                                                                                          | [Valid=4689 /-] [Invalid=0 /-]                                                                                                                                                                                                                                                                                                                                                                                                                                                                                                                                                           |       |            |
| Pre-question                                                                                                                                                | In the debate about oil and gas extraction in the area off Lofoten, Vesterålen and Senja the proponents argue that the oil and gas extraction is important for workplaces, and that security surrounding the oil industry today is excellent and the chance of an accident causing a major spillages is minimal. However, the opponents argue that an accident causing a major oil spillage will threaten the North Atlantic cod stocks that breed in this area, and that based on climate considerations and international obligations the speed of the extraction must be slowed down. |       |            |
| Literal question                                                                                                                                            | What do you think, should we start oil and gas production in the area off Lofoten, Vesterålen and Senja or should we let the oil and gas in this area remain where it is.                                                                                                                                                                                                                                                                                                                                                                                                                |       |            |
| Interviewer's instructions                                                                                                                                  | [Asked if u=2, ran4=4 AND ran40=4. ]                                                                                                                                                                                                                                                                                                                                                                                                                                                                                                                                                     |       |            |
| Notes                                                                                                                                                       | I debatten rundt olje- og gassutvinning i området utenfor Lofoten, Vesterålen og Senja argumenterer forkjemperne med at                                                                                                                                                                                                                                                                                                                                                                                                                                                                  |       |            |
| Value                                                                                                                                                       | Label                                                                                                                                                                                                                                                                                                                                                                                                                                                                                                                                                                                    | Cases | Percentage |
| 1                                                                                                                                                           | We should start oil and gas production in the area off Lofoten, Vesterålen and Senja.                                                                                                                                                                                                                                                                                                                                                                                                                                                                                                    | 23    | 0.5%       |
| 2                                                                                                                                                           | We should not start oil and gas production in the area off Lofoten, Vesterålen and Senja.                                                                                                                                                                                                                                                                                                                                                                                                                                                                                                | 31    | 0.7%       |
| 97                                                                                                                                                          | No answer                                                                                                                                                                                                                                                                                                                                                                                                                                                                                                                                                                                | 2     | 0.0%       |
| 98                                                                                                                                                          | Not asked                                                                                                                                                                                                                                                                                                                                                                                                                                                                                                                                                                                | 4633  | 98.8%      |
| Warning: these figures indicate the number of cases found in the data file. They cannot be interpreted as summary statistics of the population of interest. |                                                                                                                                                                                                                                                                                                                                                                                                                                                                                                                                                                                          |       |            |
| # r7pilotkm2_s5: Start oil production or let the oil remain in LoVeSe                                                                                       |                                                                                                                                                                                                                                                                                                                                                                                                                                                                                                                                                                                          |       |            |
| Information                                                                                                                                                 | [Type= discrete] [Format=numeric] [Range= 1-2] [Missing=*]                                                                                                                                                                                                                                                                                                                                                                                                                                                                                                                               |       |            |
| Statistics [NW/ W]                                                                                                                                          | [Valid=4689 /-] [Invalid=0 /-]                                                                                                                                                                                                                                                                                                                                                                                                                                                                                                                                                           |       |            |
| Literal question                                                                                                                                            | What do you think, should we start oil and gas production in the area off Lofoten, Vesterålen and Senja or should we let the oil and gas in this area remain where it is.                                                                                                                                                                                                                                                                                                                                                                                                                |       |            |
| Interviewer's instructions                                                                                                                                  | [Asked if u=2, ran4=5 AND ran40=4. ]                                                                                                                                                                                                                                                                                                                                                                                                                                                                                                                                                     |       |            |
| Notes                                                                                                                                                       | Hva synes du, bør vi åpne opp for olje- og gassproduksjon i området utenfor Lofoten, Vesterålen og Senja eller bør v                                                                                                                                                                                                                                                                                                                                                                                                                                                                     |       |            |



| # r7pilotkm2_s5: Start oil production or let the oil remain in LoVeSe                                                                                       |                                                                                                                                 |       |            |
|-------------------------------------------------------------------------------------------------------------------------------------------------------------|---------------------------------------------------------------------------------------------------------------------------------|-------|------------|
| Value                                                                                                                                                       | Label                                                                                                                           | Cases | Percentage |
| 1                                                                                                                                                           | We should start oil and gas production in the area off Lofoten, Vesterålen and Senja.                                           | 29    | 0.6%       |
| 2                                                                                                                                                           | We should not start oil and gas production in the area off Lofoten, Vesterålen and Senja.                                       | 33    | 0.7%       |
| 97                                                                                                                                                          | No answer                                                                                                                       | 4     | 0.1%       |
| 98                                                                                                                                                          | Not asked                                                                                                                       | 4623  | 98.6%      |
| Warning: these figures indicate the number of cases found in the data file. They cannot be interpreted as summary statistics of the population of interest. |                                                                                                                                 |       |            |
| # r7pilotkm2_comment: Comments [anonymized]                                                                                                                 |                                                                                                                                 |       |            |
| Information                                                                                                                                                 | [Type= discrete] [Format=character] [Missing=*]                                                                                 |       |            |
| Statistics [NW/ W]                                                                                                                                          | [Valid=4689 /-] [Invalid=0 /-]                                                                                                  |       |            |
| Literal question                                                                                                                                            | You can write any comments you might have here:                                                                                 |       |            |
| Interviewer's instructions                                                                                                                                  | [Asked if u=2, ran40=4. ]                                                                                                       |       |            |
| Value                                                                                                                                                       | Label                                                                                                                           | Cases | Percentage |
|                                                                                                                                                             |                                                                                                                                 | 4689  | 100.0%     |
| Warning: these figures indicate the number of cases found in the data file. They cannot be interpreted as summary statistics of the population of interest. |                                                                                                                                 |       |            |
| # r7km10_1: Which illnesses would you like to be treated with antibiotics: Sinusitis                                                                        |                                                                                                                                 |       |            |
| Information                                                                                                                                                 | [Type= discrete] [Format=numeric] [Range= 1-1] [Missing=*]                                                                      |       |            |
| Statistics [NW/ W]                                                                                                                                          | [Valid=4689 /-] [Invalid=0 /-]                                                                                                  |       |            |
| Pre-question                                                                                                                                                | Which of the following illnesses would you like to be treated with antibiotics?<br>It is possible to mark more than one answer. |       |            |
| Literal question                                                                                                                                            | Sinusitis                                                                                                                       |       |            |
| Interviewer's instructions                                                                                                                                  | [Asked if u=2. ]                                                                                                                |       |            |
| Notes                                                                                                                                                       | Bihulebetennelse (For hvilke av de følgende sykdommer ville du ønsket antibiotika?)                                             |       |            |
| Value                                                                                                                                                       | Label                                                                                                                           | Cases | Percentage |
| 0                                                                                                                                                           |                                                                                                                                 | 657   | 14.0%      |
| 1                                                                                                                                                           | Sinusitis                                                                                                                       | 524   | 11.2%      |
| 97                                                                                                                                                          | No answer                                                                                                                       | 18    | 0.4%       |
| 98                                                                                                                                                          | Not asked                                                                                                                       | 3490  | 74.4%      |
| Warning: these figures indicate the number of cases found in the data file. They cannot be interpreted as summary statistics of the population of interest. |                                                                                                                                 |       |            |
| # r7km10_2: Which illnesses would you like to be treated with antibiotics: Bronchitis                                                                       |                                                                                                                                 |       |            |
| Information                                                                                                                                                 | [Type= discrete] [Format=numeric] [Range= 1-1] [Missing=*]                                                                      |       |            |
| Statistics [NW/ W]                                                                                                                                          | [Valid=4689 /-] [Invalid=0 /-]                                                                                                  |       |            |
| Pre-question                                                                                                                                                | Which of the following illnesses would you like to be treated with antibiotics?<br>It is possible to mark more than one answer. |       |            |
| Literal question                                                                                                                                            | Bronchitis                                                                                                                      |       |            |
| Interviewer's instructions                                                                                                                                  | [Asked if u=2. ]                                                                                                                |       |            |
| Value                                                                                                                                                       | Label                                                                                                                           | Cases | Percentage |
| 0                                                                                                                                                           |                                                                                                                                 | 787   | 16.8%      |
| 1                                                                                                                                                           | Bronchitis                                                                                                                      | 394   | 8.4%       |
| 97                                                                                                                                                          | No answer                                                                                                                       | 18    | 0.4%       |
| 98                                                                                                                                                          | Not asked                                                                                                                       | 3490  | 74.4%      |
| Warning: these figures indicate the number of cases found in the data file. They cannot be interpreted as summary statistics of the population of interest. |                                                                                                                                 |       |            |

| # r7km10_3: Which illnesses would you like to be treated with antibiotics: The common cold                                                                  |                                                                                                                                 |       |                   |
|-------------------------------------------------------------------------------------------------------------------------------------------------------------|---------------------------------------------------------------------------------------------------------------------------------|-------|-------------------|
| Information                                                                                                                                                 | [Type= discrete] [Format=numeric] [Range= 1-1] [Missing=*]                                                                      |       |                   |
| Statistics [NW/ W]                                                                                                                                          | [Valid=4689 /-] [Invalid=0 /-]                                                                                                  |       |                   |
| Pre-question                                                                                                                                                | Which of the following illnesses would you like to be treated with antibiotics?<br>It is possible to mark more than one answer. |       |                   |
| Literal question                                                                                                                                            | The common cold                                                                                                                 |       |                   |
| Interviewer's instructions                                                                                                                                  | [Asked if u=2. ]                                                                                                                |       |                   |
| Value                                                                                                                                                       | Label                                                                                                                           | Cases | Percentage        |
| 0                                                                                                                                                           |                                                                                                                                 | 1166  | <div></div> 24.9% |
| 1                                                                                                                                                           | The common cold                                                                                                                 | 15    | <div></div> 0.3%  |
| 97                                                                                                                                                          | No answer                                                                                                                       | 18    | <div></div> 0.4%  |
| 98                                                                                                                                                          | Not asked                                                                                                                       | 3490  | <div></div> 74.4% |
| Warning: these figures indicate the number of cases found in the data file. They cannot be interpreted as summary statistics of the population of interest. |                                                                                                                                 |       |                   |
| # r7km10_4: Which illnesses would you like to be treated with antibiotics: Streptococci                                                                     |                                                                                                                                 |       |                   |
| Information                                                                                                                                                 | [Type= discrete] [Format=numeric] [Range= 1-1] [Missing=*]                                                                      |       |                   |
| Statistics [NW/ W]                                                                                                                                          | [Valid=4689 /-] [Invalid=0 /-]                                                                                                  |       |                   |
| Pre-question                                                                                                                                                | Which of the following illnesses would you like to be treated with antibiotics?<br>It is possible to mark more than one answer. |       |                   |
| Literal question                                                                                                                                            | Throat infection (streptococci)                                                                                                 |       |                   |
| Interviewer's instructions                                                                                                                                  | [Asked if u=2. ]                                                                                                                |       |                   |
| Notes                                                                                                                                                       | Halsbetennelse (streptokokker) (For hvilke av de følgende sykdommer ville du ønsket antibiotika?)                               |       |                   |
| Value                                                                                                                                                       | Label                                                                                                                           | Cases | Percentage        |
| 0                                                                                                                                                           |                                                                                                                                 | 449   | <div></div> 9.6%  |
| 1                                                                                                                                                           | Throat infection (streptococci)                                                                                                 | 732   | <div></div> 15.6% |
| 97                                                                                                                                                          | No answer                                                                                                                       | 18    | <div></div> 0.4%  |
| 98                                                                                                                                                          | Not asked                                                                                                                       | 3490  | <div></div> 74.4% |
| Warning: these figures indicate the number of cases found in the data file. They cannot be interpreted as summary statistics of the population of interest. |                                                                                                                                 |       |                   |
| # r7km10_5: Which illnesses would you like to be treated with antibiotics: Influenza                                                                        |                                                                                                                                 |       |                   |
| Information                                                                                                                                                 | [Type= discrete] [Format=numeric] [Range= 1-1] [Missing=*]                                                                      |       |                   |
| Statistics [NW/ W]                                                                                                                                          | [Valid=4689 /-] [Invalid=0 /-]                                                                                                  |       |                   |
| Pre-question                                                                                                                                                | Which of the following illnesses would you like to be treated with antibiotics?<br>It is possible to mark more than one answer. |       |                   |
| Literal question                                                                                                                                            | Influenza                                                                                                                       |       |                   |
| Interviewer's instructions                                                                                                                                  | [Asked if u=2. ]                                                                                                                |       |                   |
| Value                                                                                                                                                       | Label                                                                                                                           | Cases | Percentage        |
| 0                                                                                                                                                           |                                                                                                                                 | 1080  | <div></div> 23.0% |
| 1                                                                                                                                                           | Influenza                                                                                                                       | 101   | <div></div> 2.2%  |
| 97                                                                                                                                                          | No answer                                                                                                                       | 18    | <div></div> 0.4%  |
| 98                                                                                                                                                          | Not asked                                                                                                                       | 3490  | <div></div> 74.4% |
| Warning: these figures indicate the number of cases found in the data file. They cannot be interpreted as summary statistics of the population of interest. |                                                                                                                                 |       |                   |
| # r7km10_6: Which illnesses would you like to be treated with antibiotics: Ear infection                                                                    |                                                                                                                                 |       |                   |
| Information                                                                                                                                                 | [Type= discrete] [Format=numeric] [Range= 1-1] [Missing=*]                                                                      |       |                   |
| Statistics [NW/ W]                                                                                                                                          | [Valid=4689 /-] [Invalid=0 /-]                                                                                                  |       |                   |
| Pre-question                                                                                                                                                | Which of the following illnesses would you like to be treated with antibiotics?                                                 |       |                   |

| # r7km10_6: Which illnesses would you like to be treated with antibiotics: Ear infection                                                                    |                                                                                                                                                                                                                                                                                                                                                                                           |       |             |        |
|-------------------------------------------------------------------------------------------------------------------------------------------------------------|-------------------------------------------------------------------------------------------------------------------------------------------------------------------------------------------------------------------------------------------------------------------------------------------------------------------------------------------------------------------------------------------|-------|-------------|--------|
|                                                                                                                                                             | It is possible to mark more than one answer.                                                                                                                                                                                                                                                                                                                                              |       |             |        |
| Literal question                                                                                                                                            | Ear infection                                                                                                                                                                                                                                                                                                                                                                             |       |             |        |
| Interviewer's instructions                                                                                                                                  | [Asked if u=2. ]                                                                                                                                                                                                                                                                                                                                                                          |       |             |        |
| Value                                                                                                                                                       | Label                                                                                                                                                                                                                                                                                                                                                                                     | Cases | Percentage  |        |
| 0                                                                                                                                                           |                                                                                                                                                                                                                                                                                                                                                                                           | 641   | <div></div> | 13.7%  |
| 1                                                                                                                                                           | Ear infection                                                                                                                                                                                                                                                                                                                                                                             | 540   | <div></div> | 11.5%  |
| 97                                                                                                                                                          | No answer                                                                                                                                                                                                                                                                                                                                                                                 | 18    | <div></div> | 0.4%   |
| 98                                                                                                                                                          | Not asked                                                                                                                                                                                                                                                                                                                                                                                 | 3490  | <div></div> | 74.4%  |
| Warning: these figures indicate the number of cases found in the data file. They cannot be interpreted as summary statistics of the population of interest. |                                                                                                                                                                                                                                                                                                                                                                                           |       |             |        |
| # r7km10_comment: Comments [anonymized]                                                                                                                     |                                                                                                                                                                                                                                                                                                                                                                                           |       |             |        |
| Information                                                                                                                                                 | [Type= discrete] [Format=character] [Missing=*]                                                                                                                                                                                                                                                                                                                                           |       |             |        |
| Statistics [NW/ W]                                                                                                                                          | [Valid=4689 /-] [Invalid=0 /-]                                                                                                                                                                                                                                                                                                                                                            |       |             |        |
| Literal question                                                                                                                                            | You can write any comments you might have here:                                                                                                                                                                                                                                                                                                                                           |       |             |        |
| Interviewer's instructions                                                                                                                                  | [Asked if u=2. ]                                                                                                                                                                                                                                                                                                                                                                          |       |             |        |
|                                                                                                                                                             | [Data withheld for the sake of anonymity]                                                                                                                                                                                                                                                                                                                                                 |       |             |        |
| Value                                                                                                                                                       | Label                                                                                                                                                                                                                                                                                                                                                                                     | Cases | Percentage  |        |
|                                                                                                                                                             |                                                                                                                                                                                                                                                                                                                                                                                           | 4689  | <div></div> | 100.0% |
| Warning: these figures indicate the number of cases found in the data file. They cannot be interpreted as summary statistics of the population of interest. |                                                                                                                                                                                                                                                                                                                                                                                           |       |             |        |
| # r7km12_1: Most important reason for consulting doctor when respiratory infection: Symptoms last longer than expected                                      |                                                                                                                                                                                                                                                                                                                                                                                           |       |             |        |
| Information                                                                                                                                                 | [Type= discrete] [Format=numeric] [Range= 1-1] [Missing=*]                                                                                                                                                                                                                                                                                                                                |       |             |        |
| Statistics [NW/ W]                                                                                                                                          | [Valid=4689 /-] [Invalid=0 /-]                                                                                                                                                                                                                                                                                                                                                            |       |             |        |
| Pre-question                                                                                                                                                | <p>There might be several reasons for consulting a doctor when suffering from a respiratory infection. What is the most important reason for you?</p> <p>A respiratory infection is in a group of illnesses which for example can cause coughing, a bunged up/runny nose, fever, pains in the throat, pains in the ears, exhaustion etc. It is possible to mark more than one answer.</p> |       |             |        |
| Literal question                                                                                                                                            | That the symptoms last longer than I expect                                                                                                                                                                                                                                                                                                                                               |       |             |        |
| Interviewer's instructions                                                                                                                                  | [Asked if u=2. ]                                                                                                                                                                                                                                                                                                                                                                          |       |             |        |
| Notes                                                                                                                                                       | At plagene varer lenger enn jeg forventer (Det kan være flere årsaker til at folk oppsøker lege for en luftveisinfeksj                                                                                                                                                                                                                                                                    |       |             |        |
| Value                                                                                                                                                       | Label                                                                                                                                                                                                                                                                                                                                                                                     | Cases | Percentage  |        |
| 0                                                                                                                                                           |                                                                                                                                                                                                                                                                                                                                                                                           | 557   | <div></div> | 11.9%  |
| 1                                                                                                                                                           | That the symptoms last longer than I expect                                                                                                                                                                                                                                                                                                                                               | 623   | <div></div> | 13.3%  |
| 97                                                                                                                                                          | No answer                                                                                                                                                                                                                                                                                                                                                                                 | 19    | <div></div> | 0.4%   |
| 98                                                                                                                                                          | Not asked                                                                                                                                                                                                                                                                                                                                                                                 | 3490  | <div></div> | 74.4%  |
| Warning: these figures indicate the number of cases found in the data file. They cannot be interpreted as summary statistics of the population of interest. |                                                                                                                                                                                                                                                                                                                                                                                           |       |             |        |
| # r7km12_2: Most important reason for consulting doctor when respiratory infection: Symptoms more severe than expected                                      |                                                                                                                                                                                                                                                                                                                                                                                           |       |             |        |
| Information                                                                                                                                                 | [Type= discrete] [Format=numeric] [Range= 1-1] [Missing=*]                                                                                                                                                                                                                                                                                                                                |       |             |        |
| Statistics [NW/ W]                                                                                                                                          | [Valid=4689 /-] [Invalid=0 /-]                                                                                                                                                                                                                                                                                                                                                            |       |             |        |
| Pre-question                                                                                                                                                | <p>There might be several reasons for consulting a doctor when suffering from a respiratory infection. What is the most important reason for you?</p> <p>A respiratory infection is in a group of illnesses which for example can cause coughing, a bunged up/runny nose, fever, pains in the throat, pains in the ears, exhaustion etc. It is possible to mark more than one answer.</p> |       |             |        |
| Literal question                                                                                                                                            | That the symptoms are much more severe than I expect                                                                                                                                                                                                                                                                                                                                      |       |             |        |

|                                                                                                                                                                    |                                                                |                                                                                                                                                                                                                                                                                                                                                                                   |                   |
|--------------------------------------------------------------------------------------------------------------------------------------------------------------------|----------------------------------------------------------------|-----------------------------------------------------------------------------------------------------------------------------------------------------------------------------------------------------------------------------------------------------------------------------------------------------------------------------------------------------------------------------------|-------------------|
| <b># r7km12_2: Most important reason for consulting doctor when respiratory infection: Symptoms more severe than expected</b>                                      |                                                                |                                                                                                                                                                                                                                                                                                                                                                                   |                   |
| <b>Interviewer's instructions</b>                                                                                                                                  |                                                                | [Asked if u=2. ]                                                                                                                                                                                                                                                                                                                                                                  |                   |
| <b>Notes</b>                                                                                                                                                       |                                                                | At plagene er kraftigere enn jeg forventer (Det kan være flere årsaker til at folk oppsøker lege for en luftveisinfeks                                                                                                                                                                                                                                                            |                   |
| <b>Value</b>                                                                                                                                                       | <b>Label</b>                                                   | <b>Cases</b>                                                                                                                                                                                                                                                                                                                                                                      | <b>Percentage</b> |
| 0                                                                                                                                                                  |                                                                | 521                                                                                                                                                                                                                                                                                                                                                                               | 11.1%             |
| 1                                                                                                                                                                  | That the symptoms are much more severe than I expect           | 659                                                                                                                                                                                                                                                                                                                                                                               | 14.1%             |
| 97                                                                                                                                                                 | No answer                                                      | 19                                                                                                                                                                                                                                                                                                                                                                                | 0.4%              |
| 98                                                                                                                                                                 | Not asked                                                      | 3490                                                                                                                                                                                                                                                                                                                                                                              | 74.4%             |
| <i>Warning: these figures indicate the number of cases found in the data file. They cannot be interpreted as summary statistics of the population of interest.</i> |                                                                |                                                                                                                                                                                                                                                                                                                                                                                   |                   |
| <b># r7km12_3: Most important reason for consulting doctor when respiratory infection: Need a doctor's certificate</b>                                             |                                                                |                                                                                                                                                                                                                                                                                                                                                                                   |                   |
| <b>Information</b>                                                                                                                                                 |                                                                | [Type= discrete] [Format=numeric] [Range= 1-1] [Missing=*]                                                                                                                                                                                                                                                                                                                        |                   |
| <b>Statistics [NW/ W]</b>                                                                                                                                          |                                                                | [Valid=4689 /-] [Invalid=0 /-]                                                                                                                                                                                                                                                                                                                                                    |                   |
| <b>Pre-question</b>                                                                                                                                                |                                                                | There might be several reasons for consulting a doctor when suffering from a respiratory infection.<br>What is the most important reason for you?<br>A respiratory infection is in a group of illnesses which for example can cause coughing, a bunged up/runny nose, fever, pains in the throat, pains in the ears, exhaustion etc. It is possible to mark more than one answer. |                   |
| <b>Literal question</b>                                                                                                                                            |                                                                | That I need a doctor's certificate                                                                                                                                                                                                                                                                                                                                                |                   |
| <b>Interviewer's instructions</b>                                                                                                                                  |                                                                | [Asked if u=2. ]                                                                                                                                                                                                                                                                                                                                                                  |                   |
| <b>Notes</b>                                                                                                                                                       |                                                                | At jeg trenger sykemelding (Det kan være flere årsaker til at folk oppsøker lege for en luftveisinfeksjon. Hva er de v                                                                                                                                                                                                                                                            |                   |
| <b>Value</b>                                                                                                                                                       | <b>Label</b>                                                   | <b>Cases</b>                                                                                                                                                                                                                                                                                                                                                                      | <b>Percentage</b> |
| 0                                                                                                                                                                  |                                                                | 940                                                                                                                                                                                                                                                                                                                                                                               | 20.0%             |
| 1                                                                                                                                                                  | That I need a doctor's certificate                             | 240                                                                                                                                                                                                                                                                                                                                                                               | 5.1%              |
| 97                                                                                                                                                                 | No answer                                                      | 19                                                                                                                                                                                                                                                                                                                                                                                | 0.4%              |
| 98                                                                                                                                                                 | Not asked                                                      | 3490                                                                                                                                                                                                                                                                                                                                                                              | 74.4%             |
| <i>Warning: these figures indicate the number of cases found in the data file. They cannot be interpreted as summary statistics of the population of interest.</i> |                                                                |                                                                                                                                                                                                                                                                                                                                                                                   |                   |
| <b># r7km12_4: Most important reason for consulting doctor when respiratory infection: Encouraged by others</b>                                                    |                                                                |                                                                                                                                                                                                                                                                                                                                                                                   |                   |
| <b>Information</b>                                                                                                                                                 |                                                                | [Type= discrete] [Format=numeric] [Range= 1-1] [Missing=*]                                                                                                                                                                                                                                                                                                                        |                   |
| <b>Statistics [NW/ W]</b>                                                                                                                                          |                                                                | [Valid=4689 /-] [Invalid=0 /-]                                                                                                                                                                                                                                                                                                                                                    |                   |
| <b>Pre-question</b>                                                                                                                                                |                                                                | There might be several reasons for consulting a doctor when suffering from a respiratory infection.<br>What is the most important reason for you?<br>A respiratory infection is in a group of illnesses which for example can cause coughing, a bunged up/runny nose, fever, pains in the throat, pains in the ears, exhaustion etc. It is possible to mark more than one answer. |                   |
| <b>Literal question</b>                                                                                                                                            |                                                                | That others (family, friends) encourage me to visit the doctor                                                                                                                                                                                                                                                                                                                    |                   |
| <b>Interviewer's instructions</b>                                                                                                                                  |                                                                | [Asked if u=2. ]                                                                                                                                                                                                                                                                                                                                                                  |                   |
| <b>Notes</b>                                                                                                                                                       |                                                                | At andre (familie, venner) oppfordrer meg til å oppsøke lege (Det kan være flere årsaker til at folk oppsøker lege f                                                                                                                                                                                                                                                              |                   |
| <b>Value</b>                                                                                                                                                       | <b>Label</b>                                                   | <b>Cases</b>                                                                                                                                                                                                                                                                                                                                                                      | <b>Percentage</b> |
| 0                                                                                                                                                                  |                                                                | 1010                                                                                                                                                                                                                                                                                                                                                                              | 21.5%             |
| 1                                                                                                                                                                  | That others (family, friends) encourage me to visit the doctor | 170                                                                                                                                                                                                                                                                                                                                                                               | 3.6%              |
| 97                                                                                                                                                                 | No answer                                                      | 19                                                                                                                                                                                                                                                                                                                                                                                | 0.4%              |
| 98                                                                                                                                                                 | Not asked                                                      | 3490                                                                                                                                                                                                                                                                                                                                                                              | 74.4%             |
| <i>Warning: these figures indicate the number of cases found in the data file. They cannot be interpreted as summary statistics of the population of interest.</i> |                                                                |                                                                                                                                                                                                                                                                                                                                                                                   |                   |
| <b># r7km12_5: Most important reason for consulting doctor when respiratory infection: Others I know with similar symptoms were helped</b>                         |                                                                |                                                                                                                                                                                                                                                                                                                                                                                   |                   |
| <b>Information</b>                                                                                                                                                 |                                                                | [Type= discrete] [Format=numeric] [Range= 1-1] [Missing=*]                                                                                                                                                                                                                                                                                                                        |                   |
| <b>Statistics [NW/ W]</b>                                                                                                                                          |                                                                | [Valid=4689 /-] [Invalid=0 /-]                                                                                                                                                                                                                                                                                                                                                    |                   |

### # r7km12\_5: Most important reason for consulting doctor when respiratory infection: Others I know with similar symptoms were helped

|                                   |                                                                                                                                                                                                                                                                                                                                                                                   |
|-----------------------------------|-----------------------------------------------------------------------------------------------------------------------------------------------------------------------------------------------------------------------------------------------------------------------------------------------------------------------------------------------------------------------------------|
| <b>Pre-question</b>               | There might be several reasons for consulting a doctor when suffering from a respiratory infection.<br>What is the most important reason for you?<br>A respiratory infection is in a group of illnesses which for example can cause coughing, a bunged up/runny nose, fever, pains in the throat, pains in the ears, exhaustion etc. It is possible to mark more than one answer. |
| <b>Literal question</b>           | That others I know with similar symptoms were helped by the doctor                                                                                                                                                                                                                                                                                                                |
| <b>Interviewer's instructions</b> | [Asked if u=2. ]                                                                                                                                                                                                                                                                                                                                                                  |
| <b>Notes</b>                      | At andre jeg kjenner med lignende plager fikk hjelp av legen (Det kan være flere årsaker til at folk oppsøker lege for                                                                                                                                                                                                                                                            |

| Value | Label                                                              | Cases | Percentage |
|-------|--------------------------------------------------------------------|-------|------------|
| 0     |                                                                    | 1152  | 24.6%      |
| 1     | That others I know with similar symptoms were helped by the doctor | 28    | 0.6%       |
| 97    | No answer                                                          | 19    | 0.4%       |
| 98    | Not asked                                                          | 3490  | 74.4%      |

Warning: these figures indicate the number of cases found in the data file. They cannot be interpreted as summary statistics of the population of interest.

### # r7km12\_6: Most important reason for consulting doctor when respiratory infection: Other

|                                   |                                                                                                                                                                                                                                                                                                                                                                                   |
|-----------------------------------|-----------------------------------------------------------------------------------------------------------------------------------------------------------------------------------------------------------------------------------------------------------------------------------------------------------------------------------------------------------------------------------|
| <b>Information</b>                | [Type= discrete] [Format=numeric] [Range= 1-1] [Missing=*]                                                                                                                                                                                                                                                                                                                        |
| <b>Statistics [NW/ W]</b>         | [Valid=4689 /-] [Invalid=0 /-]                                                                                                                                                                                                                                                                                                                                                    |
| <b>Pre-question</b>               | There might be several reasons for consulting a doctor when suffering from a respiratory infection.<br>What is the most important reason for you?<br>A respiratory infection is in a group of illnesses which for example can cause coughing, a bunged up/runny nose, fever, pains in the throat, pains in the ears, exhaustion etc. It is possible to mark more than one answer. |
| <b>Literal question</b>           | Other, note                                                                                                                                                                                                                                                                                                                                                                       |
| <b>Interviewer's instructions</b> | [Asked if u=2. ]                                                                                                                                                                                                                                                                                                                                                                  |
| <b>Notes</b>                      | Annet, skriv: (Det kan være flere årsaker til at folk oppsøker lege for en luftveisinfeksjon. Hva er de viktigste års                                                                                                                                                                                                                                                             |

| Value | Label       | Cases | Percentage |
|-------|-------------|-------|------------|
| 0     |             | 1129  | 24.1%      |
| 1     | Other, note | 51    | 1.1%       |
| 97    | No answer   | 19    | 0.4%       |
| 98    | Not asked   | 3490  | 74.4%      |

Warning: these figures indicate the number of cases found in the data file. They cannot be interpreted as summary statistics of the population of interest.

### # r7km12\_6\_other: Most important reason for consulting doctor when respiratory infection: Other [anonymized]

|                                   |                                                                                                                                                                                                                                                                                                                                                                                   |
|-----------------------------------|-----------------------------------------------------------------------------------------------------------------------------------------------------------------------------------------------------------------------------------------------------------------------------------------------------------------------------------------------------------------------------------|
| <b>Information</b>                | [Type= discrete] [Format=character] [Missing=*]                                                                                                                                                                                                                                                                                                                                   |
| <b>Statistics [NW/ W]</b>         | [Valid=4689 /-] [Invalid=0 /-]                                                                                                                                                                                                                                                                                                                                                    |
| <b>Pre-question</b>               | There might be several reasons for consulting a doctor when suffering from a respiratory infection.<br>What is the most important reason for you?<br>A respiratory infection is in a group of illnesses which for example can cause coughing, a bunged up/runny nose, fever, pains in the throat, pains in the ears, exhaustion etc. It is possible to mark more than one answer. |
| <b>Literal question</b>           | Other, note                                                                                                                                                                                                                                                                                                                                                                       |
| <b>Interviewer's instructions</b> | [Asked if u=2. ]<br><br>[Data withheld for the sake of anonymity]                                                                                                                                                                                                                                                                                                                 |
| <b>Notes</b>                      | Annet, skriv: (Det kan være flere årsaker til at folk oppsøker lege for en luftveisinfeksjon. Hva er de viktigste års                                                                                                                                                                                                                                                             |

| Value | Label     | Cases | Percentage |
|-------|-----------|-------|------------|
|       |           | 4689  | 100.0%     |
| 97    | No answer | 0     |            |
| 98    | Not asked | 0     |            |

|                                                                                                                                                             |                                                                                                                                                                                                                                                                                    |       |                    |
|-------------------------------------------------------------------------------------------------------------------------------------------------------------|------------------------------------------------------------------------------------------------------------------------------------------------------------------------------------------------------------------------------------------------------------------------------------|-------|--------------------|
| # r7km12_6_other: Most important reason for consulting doctor when respiratory infection: Other [anonymized]                                                |                                                                                                                                                                                                                                                                                    |       |                    |
| Warning: these figures indicate the number of cases found in the data file. They cannot be interpreted as summary statistics of the population of interest. |                                                                                                                                                                                                                                                                                    |       |                    |
| # r7km12_comment: Comments [anonymized]                                                                                                                     |                                                                                                                                                                                                                                                                                    |       |                    |
| Information                                                                                                                                                 | [Type= discrete] [Format=character] [Missing=*]                                                                                                                                                                                                                                    |       |                    |
| Statistics [NW/ W]                                                                                                                                          | [Valid=4689 /-] [Invalid=0 /-]                                                                                                                                                                                                                                                     |       |                    |
| Literal question                                                                                                                                            | You can write any comments you might have here:                                                                                                                                                                                                                                    |       |                    |
| Interviewer's instructions                                                                                                                                  | [Asked if u=2. ]<br><br>[Data withheld for the sake of anonymity]                                                                                                                                                                                                                  |       |                    |
| Value                                                                                                                                                       | Label                                                                                                                                                                                                                                                                              | Cases | Percentage         |
|                                                                                                                                                             |                                                                                                                                                                                                                                                                                    | 4689  | <div></div> 100.0% |
| Warning: these figures indicate the number of cases found in the data file. They cannot be interpreted as summary statistics of the population of interest. |                                                                                                                                                                                                                                                                                    |       |                    |
| # r7dvm1: Agree/disagree: A rejected adult asylum seeker should be allowed residence if the children are entitled to live in the country                    |                                                                                                                                                                                                                                                                                    |       |                    |
| Information                                                                                                                                                 | [Type= discrete] [Format=numeric] [Range= 1-7] [Missing=*]                                                                                                                                                                                                                         |       |                    |
| Statistics [NW/ W]                                                                                                                                          | [Valid=4689 /-] [Invalid=0 /-]                                                                                                                                                                                                                                                     |       |                    |
| Pre-question                                                                                                                                                | Now we would like to know something about your views about society in general, and about the new diversity in Norway.<br><br>Even if an adult asylum seeker has been rejected, the government may consider allowing residence if the children are entitled to live in the country. |       |                    |
| Literal question                                                                                                                                            | How much do you agree or disagree that an asylum seeker who has been rejected should be allowed to stay in such cases?                                                                                                                                                             |       |                    |
| Interviewer's instructions                                                                                                                                  | [Asked if u=2. ]                                                                                                                                                                                                                                                                   |       |                    |
| Notes                                                                                                                                                       | Vi ønsker nå å få vite noe om dine synspunkter på samfunnet generelt og det nye mangfoldet i Norge. Selv om en voks                                                                                                                                                                |       |                    |
| Value                                                                                                                                                       | Label                                                                                                                                                                                                                                                                              | Cases | Percentage         |
| 1                                                                                                                                                           | Strongly agree                                                                                                                                                                                                                                                                     | 182   | <div></div> 3.9%   |
| 2                                                                                                                                                           | Agree                                                                                                                                                                                                                                                                              | 354   | <div></div> 7.5%   |
| 3                                                                                                                                                           | Somewhat agree                                                                                                                                                                                                                                                                     | 262   | <div></div> 5.6%   |
| 4                                                                                                                                                           | Neither agree nor disagree                                                                                                                                                                                                                                                         | 98    | <div></div> 2.1%   |
| 5                                                                                                                                                           | Somewhat disagree                                                                                                                                                                                                                                                                  | 104   | <div></div> 2.2%   |
| 6                                                                                                                                                           | Disagree                                                                                                                                                                                                                                                                           | 84    | <div></div> 1.8%   |
| 7                                                                                                                                                           | Strongly disagree                                                                                                                                                                                                                                                                  | 85    | <div></div> 1.8%   |
| 97                                                                                                                                                          | No answer                                                                                                                                                                                                                                                                          | 30    | <div></div> 0.6%   |
| 98                                                                                                                                                          | Not asked                                                                                                                                                                                                                                                                          | 3490  | <div></div> 74.4%  |
| Warning: these figures indicate the number of cases found in the data file. They cannot be interpreted as summary statistics of the population of interest. |                                                                                                                                                                                                                                                                                    |       |                    |
| # r7ran11: [Randomizes if u=2. ]                                                                                                                            |                                                                                                                                                                                                                                                                                    |       |                    |
| Information                                                                                                                                                 | [Type= discrete] [Format=numeric] [Range= 1-3] [Missing=*]                                                                                                                                                                                                                         |       |                    |
| Statistics [NW/ W]                                                                                                                                          | [Valid=631 /-] [Invalid=4058 /-]                                                                                                                                                                                                                                                   |       |                    |
| Interviewer's instructions                                                                                                                                  | [Randomizes if u=2, R4DV29_1=97/98 and the respondent is recruited in wave 3. ]                                                                                                                                                                                                    |       |                    |
| Value                                                                                                                                                       | Label                                                                                                                                                                                                                                                                              | Cases | Percentage         |
| 1                                                                                                                                                           | 1                                                                                                                                                                                                                                                                                  | 226   | <div></div> 35.8%  |
| 2                                                                                                                                                           | 2                                                                                                                                                                                                                                                                                  | 195   | <div></div> 30.9%  |
| 3                                                                                                                                                           | 3                                                                                                                                                                                                                                                                                  | 210   | <div></div> 33.3%  |
| Sysmiss                                                                                                                                                     |                                                                                                                                                                                                                                                                                    | 4058  |                    |
| Warning: these figures indicate the number of cases found in the data file. They cannot be interpreted as summary statistics of the population of interest. |                                                                                                                                                                                                                                                                                    |       |                    |
| # r7dvm2a: Agree/disagree: Begging should be prohibited in Norway, Austrian Constitutional Court                                                            |                                                                                                                                                                                                                                                                                    |       |                    |
| Information                                                                                                                                                 | [Type= discrete] [Format=numeric] [Range= 1-7] [Missing=*]                                                                                                                                                                                                                         |       |                    |

| # r7dvm2a: Agree/disagree: Begging should be prohibited in Norway, Austrian Constitutional Court                                                            |                            |                                                                                                                                                                            |            |  |
|-------------------------------------------------------------------------------------------------------------------------------------------------------------|----------------------------|----------------------------------------------------------------------------------------------------------------------------------------------------------------------------|------------|--|
| Statistics [NW/ W]                                                                                                                                          |                            | [Valid=4689 /-] [Invalid=0 /-]                                                                                                                                             |            |  |
| Pre-question                                                                                                                                                |                            | During the last three years the Constitutional Court (Austria) has ruled that a prohibition against begging was an illegal intervention on the basis of freedom of speech. |            |  |
| Literal question                                                                                                                                            |                            | To what extent do you agree or disagree that begging should be prohibited in Norway?                                                                                       |            |  |
| Interviewer's instructions                                                                                                                                  |                            | [Asked if u=2 and ran11=1. ]                                                                                                                                               |            |  |
| Notes                                                                                                                                                       |                            | I løpet av de siste tre årene har den østerrikske konstitusjonsdomstolen kommet til at et forbud mot tigging var et ul                                                     |            |  |
| Value                                                                                                                                                       | Label                      | Cases                                                                                                                                                                      | Percentage |  |
| 1                                                                                                                                                           | Strongly agree             | 43                                                                                                                                                                         | 0.9%       |  |
| 2                                                                                                                                                           | Agree                      | 47                                                                                                                                                                         | 1.0%       |  |
| 3                                                                                                                                                           | Somewhat agree             | 38                                                                                                                                                                         | 0.8%       |  |
| 4                                                                                                                                                           | Neither agree nor disagree | 30                                                                                                                                                                         | 0.6%       |  |
| 5                                                                                                                                                           | Somewhat disagree          | 27                                                                                                                                                                         | 0.6%       |  |
| 6                                                                                                                                                           | Disagree                   | 27                                                                                                                                                                         | 0.6%       |  |
| 7                                                                                                                                                           | Strongly disagree          | 10                                                                                                                                                                         | 0.2%       |  |
| 97                                                                                                                                                          | No answer                  | 4                                                                                                                                                                          | 0.1%       |  |
| 98                                                                                                                                                          | Not asked                  | 4463                                                                                                                                                                       | 95.2%      |  |
| Warning: these figures indicate the number of cases found in the data file. They cannot be interpreted as summary statistics of the population of interest. |                            |                                                                                                                                                                            |            |  |
| # r7dvm2b: Agree/disagree: Begging should be prohibited in Norway, US Federal Court                                                                         |                            |                                                                                                                                                                            |            |  |
| Information                                                                                                                                                 |                            | [Type= discrete] [Format=numeric] [Range= 1-7] [Missing=*]                                                                                                                 |            |  |
| Statistics [NW/ W]                                                                                                                                          |                            | [Valid=4689 /-] [Invalid=0 /-]                                                                                                                                             |            |  |
| Pre-question                                                                                                                                                |                            | During the last three years the US Federal Court has ruled that a prohibition against begging was an illegal intervention on the basis of freedom of speech.               |            |  |
| Literal question                                                                                                                                            |                            | To what extent do you agree or disagree that begging should be prohibited in Norway?                                                                                       |            |  |
| Interviewer's instructions                                                                                                                                  |                            | [Asked if u=2 and ran11=2. ]                                                                                                                                               |            |  |
| Notes                                                                                                                                                       |                            | I løpet av de siste tre årene har den amerikanske føderale domstolen kommet til at et forbud mot tigging var et ulovli                                                     |            |  |
| Value                                                                                                                                                       | Label                      | Cases                                                                                                                                                                      | Percentage |  |
| 1                                                                                                                                                           | Strongly agree             | 43                                                                                                                                                                         | 0.9%       |  |
| 2                                                                                                                                                           | Agree                      | 28                                                                                                                                                                         | 0.6%       |  |
| 3                                                                                                                                                           | Somewhat agree             | 46                                                                                                                                                                         | 1.0%       |  |
| 4                                                                                                                                                           | Neither agree nor disagree | 24                                                                                                                                                                         | 0.5%       |  |
| 5                                                                                                                                                           | Somewhat disagree          | 13                                                                                                                                                                         | 0.3%       |  |
| 6                                                                                                                                                           | Disagree                   | 24                                                                                                                                                                         | 0.5%       |  |
| 7                                                                                                                                                           | Strongly disagree          | 16                                                                                                                                                                         | 0.3%       |  |
| 97                                                                                                                                                          | No answer                  | 1                                                                                                                                                                          | 0.0%       |  |
| 98                                                                                                                                                          | Not asked                  | 4494                                                                                                                                                                       | 95.8%      |  |
| Warning: these figures indicate the number of cases found in the data file. They cannot be interpreted as summary statistics of the population of interest. |                            |                                                                                                                                                                            |            |  |
| # r7dvm2c: Agree/disagree: Begging should be prohibited in Norway                                                                                           |                            |                                                                                                                                                                            |            |  |
| Information                                                                                                                                                 |                            | [Type= discrete] [Format=numeric] [Range= 1-7] [Missing=*]                                                                                                                 |            |  |
| Statistics [NW/ W]                                                                                                                                          |                            | [Valid=4689 /-] [Invalid=0 /-]                                                                                                                                             |            |  |
| Literal question                                                                                                                                            |                            | To what extent do you agree or disagree that begging should be prohibited in Norway?                                                                                       |            |  |
| Interviewer's instructions                                                                                                                                  |                            | [Asked if u=2 and ran11=3. ]                                                                                                                                               |            |  |
| Value                                                                                                                                                       | Label                      | Cases                                                                                                                                                                      | Percentage |  |
| 1                                                                                                                                                           | Strongly agree             | 51                                                                                                                                                                         | 1.1%       |  |

| # r7dvm2c: Agree/disagree: Begging should be prohibited in Norway                                                                                           |                                                                                                                                                                                                                                                                                                                                                                                                                                                                                           |       |            |
|-------------------------------------------------------------------------------------------------------------------------------------------------------------|-------------------------------------------------------------------------------------------------------------------------------------------------------------------------------------------------------------------------------------------------------------------------------------------------------------------------------------------------------------------------------------------------------------------------------------------------------------------------------------------|-------|------------|
| Value                                                                                                                                                       | Label                                                                                                                                                                                                                                                                                                                                                                                                                                                                                     | Cases | Percentage |
| 2                                                                                                                                                           | Agree                                                                                                                                                                                                                                                                                                                                                                                                                                                                                     | 42    | 0.9%       |
| 3                                                                                                                                                           | Somewhat agree                                                                                                                                                                                                                                                                                                                                                                                                                                                                            | 39    | 0.8%       |
| 4                                                                                                                                                           | Neither agree nor disagree                                                                                                                                                                                                                                                                                                                                                                                                                                                                | 22    | 0.5%       |
| 5                                                                                                                                                           | Somewhat disagree                                                                                                                                                                                                                                                                                                                                                                                                                                                                         | 17    | 0.4%       |
| 6                                                                                                                                                           | Disagree                                                                                                                                                                                                                                                                                                                                                                                                                                                                                  | 21    | 0.4%       |
| 7                                                                                                                                                           | Strongly disagree                                                                                                                                                                                                                                                                                                                                                                                                                                                                         | 17    | 0.4%       |
| 97                                                                                                                                                          | No answer                                                                                                                                                                                                                                                                                                                                                                                                                                                                                 | 1     | 0.0%       |
| 98                                                                                                                                                          | Not asked                                                                                                                                                                                                                                                                                                                                                                                                                                                                                 | 4479  | 95.5%      |
| Warning: these figures indicate the number of cases found in the data file. They cannot be interpreted as summary statistics of the population of interest. |                                                                                                                                                                                                                                                                                                                                                                                                                                                                                           |       |            |
| # r7ran12: [Randomizes if u=2. ]                                                                                                                            |                                                                                                                                                                                                                                                                                                                                                                                                                                                                                           |       |            |
| Information                                                                                                                                                 | [Type= discrete] [Format=numeric] [Range= 1-9] [Missing=*]                                                                                                                                                                                                                                                                                                                                                                                                                                |       |            |
| Statistics [NW/ W]                                                                                                                                          | [Valid=1179 /-] [Invalid=3510 /-]                                                                                                                                                                                                                                                                                                                                                                                                                                                         |       |            |
| Interviewer's instructions                                                                                                                                  | [Randomizes if u=2. ]                                                                                                                                                                                                                                                                                                                                                                                                                                                                     |       |            |
| Value                                                                                                                                                       | Label                                                                                                                                                                                                                                                                                                                                                                                                                                                                                     | Cases | Percentage |
| 1                                                                                                                                                           | 1                                                                                                                                                                                                                                                                                                                                                                                                                                                                                         | 130   | 11.0%      |
| 2                                                                                                                                                           | 2                                                                                                                                                                                                                                                                                                                                                                                                                                                                                         | 136   | 11.5%      |
| 3                                                                                                                                                           | 3                                                                                                                                                                                                                                                                                                                                                                                                                                                                                         | 129   | 10.9%      |
| 4                                                                                                                                                           | 4                                                                                                                                                                                                                                                                                                                                                                                                                                                                                         | 138   | 11.7%      |
| 5                                                                                                                                                           | 5                                                                                                                                                                                                                                                                                                                                                                                                                                                                                         | 132   | 11.2%      |
| 6                                                                                                                                                           | 6                                                                                                                                                                                                                                                                                                                                                                                                                                                                                         | 134   | 11.4%      |
| 7                                                                                                                                                           | 7                                                                                                                                                                                                                                                                                                                                                                                                                                                                                         | 126   | 10.7%      |
| 8                                                                                                                                                           | 8                                                                                                                                                                                                                                                                                                                                                                                                                                                                                         | 119   | 10.1%      |
| 9                                                                                                                                                           | 9                                                                                                                                                                                                                                                                                                                                                                                                                                                                                         | 135   | 11.5%      |
| Sysmiss                                                                                                                                                     |                                                                                                                                                                                                                                                                                                                                                                                                                                                                                           | 3510  |            |
| Warning: these figures indicate the number of cases found in the data file. They cannot be interpreted as summary statistics of the population of interest. |                                                                                                                                                                                                                                                                                                                                                                                                                                                                                           |       |            |
| # r7dv13a: Would you have signed: Petition against closing local casualty clinic, 1% signed, people you know/respect                                        |                                                                                                                                                                                                                                                                                                                                                                                                                                                                                           |       |            |
| Information                                                                                                                                                 | [Type= discrete] [Format=numeric] [Range= 1-2] [Missing=*]                                                                                                                                                                                                                                                                                                                                                                                                                                |       |            |
| Statistics [NW/ W]                                                                                                                                          | [Valid=4689 /-] [Invalid=0 /-]                                                                                                                                                                                                                                                                                                                                                                                                                                                            |       |            |
| Pre-question                                                                                                                                                | Imagine the following situation: Politicians are planning to close the casualty clinic closest to you in order to extend the capacity at the nearest hospital. Meaning your journey will be longer should you be in need of immediate medical assistance. A petition against the closure has been established, and it has been published on the internet. Approximately 1 % of the inhabitants of your municipality have signed the petition, and among them people you know and respect. |       |            |
| Literal question                                                                                                                                            | Would you have signed the petition?                                                                                                                                                                                                                                                                                                                                                                                                                                                       |       |            |
| Interviewer's instructions                                                                                                                                  | [Asked if u=2 and ran12=1. ]                                                                                                                                                                                                                                                                                                                                                                                                                                                              |       |            |
| Value                                                                                                                                                       | Label                                                                                                                                                                                                                                                                                                                                                                                                                                                                                     | Cases | Percentage |
| 1                                                                                                                                                           | Yes                                                                                                                                                                                                                                                                                                                                                                                                                                                                                       | 80    | 1.7%       |
| 2                                                                                                                                                           | No                                                                                                                                                                                                                                                                                                                                                                                                                                                                                        | 49    | 1.0%       |
| 97                                                                                                                                                          | No answer                                                                                                                                                                                                                                                                                                                                                                                                                                                                                 | 1     | 0.0%       |
| 98                                                                                                                                                          | Not asked                                                                                                                                                                                                                                                                                                                                                                                                                                                                                 | 4559  | 97.2%      |
| Warning: these figures indicate the number of cases found in the data file. They cannot be interpreted as summary statistics of the population of interest. |                                                                                                                                                                                                                                                                                                                                                                                                                                                                                           |       |            |
| # r7dv13b: Would you have signed: Petition against closing local casualty clinic, 1% signed, people you don't agree with politically                        |                                                                                                                                                                                                                                                                                                                                                                                                                                                                                           |       |            |
| Information                                                                                                                                                 | [Type= discrete] [Format=numeric] [Range= 1-2] [Missing=*]                                                                                                                                                                                                                                                                                                                                                                                                                                |       |            |
| Statistics [NW/ W]                                                                                                                                          | [Valid=4689 /-] [Invalid=0 /-]                                                                                                                                                                                                                                                                                                                                                                                                                                                            |       |            |



**# r7dv13b: Would you have signed: Petition against closing local casualty clinic, 1% signed, people you don't agree with politically**

**Pre-question** Imagine the following situation: Politicians are planning to close the casualty clinic closest to you in order to extend the capacity at the nearest hospital. Meaning your journey will be longer should you be in need of immediate medical assistance. A petition against the closure has been established, and it has been published on the internet. Approximately 1 % of the inhabitants of your municipality have signed the petition, and among them people you usually don't agree with politically.

**Literal question** Would you have signed the petition?

**Interviewer's instructions** [Asked if u=2 and ran12=2. ]

| Value | Label     | Cases | Percentage |
|-------|-----------|-------|------------|
| 1     | Yes       | 98    | 2.1%       |
| 2     | No        | 34    | 0.7%       |
| 97    | No answer | 4     | 0.1%       |
| 98    | Not asked | 4553  | 97.1%      |

*Warning: these figures indicate the number of cases found in the data file. They cannot be interpreted as summary statistics of the population of interest.*

**# r7dv13c: Would you have signed: Petition against closing local casualty clinic, 10% signed, people you know/respect**

**Information** [Type= discrete] [Format=numeric] [Range= 1-2] [Missing=\*]

**Statistics [NW/ W]** [Valid=4689 /-] [Invalid=0 /-]

**Pre-question** Imagine the following situation: Politicians are planning to close the casualty clinic closest to you in order to extend the capacity at the nearest hospital. Meaning your journey will be longer should you be in need of immediate medical assistance. A petition against the closure has been established, and it has been published on the internet. Approximately 10 % of the inhabitants of your municipality have signed the petition, and among them people you know and respect.

**Literal question** Would you have signed the petition?

**Interviewer's instructions** [Asked if u=2 and ran12=3. ]

| Value | Label     | Cases | Percentage |
|-------|-----------|-------|------------|
| 1     | Yes       | 80    | 1.7%       |
| 2     | No        | 45    | 1.0%       |
| 97    | No answer | 4     | 0.1%       |
| 98    | Not asked | 4560  | 97.2%      |

*Warning: these figures indicate the number of cases found in the data file. They cannot be interpreted as summary statistics of the population of interest.*

**# r7dv13d: Would you have signed: Petition against closing local casualty clinic, 10% signed, people you don't agree with politically**

**Information** [Type= discrete] [Format=numeric] [Range= 1-2] [Missing=\*]

**Statistics [NW/ W]** [Valid=4689 /-] [Invalid=0 /-]

**Pre-question** Imagine the following situation: Politicians are planning to close the casualty clinic closest to you in order to extend the capacity at the nearest hospital. Meaning your journey will be longer should you be in need of immediate medical assistance. A petition against the closure has been established, and it has been published on the internet. Approximately 10 % of the inhabitants of your municipality have signed the petition, and among them people you usually don't agree with politically.

**Literal question** Would you have signed the petition?

**Interviewer's instructions** [Asked if u=2 and ran12=4. ]

| Value | Label     | Cases | Percentage |
|-------|-----------|-------|------------|
| 1     | Yes       | 95    | 2.0%       |
| 2     | No        | 41    | 0.9%       |
| 97    | No answer | 2     | 0.0%       |
| 98    | Not asked | 4551  | 97.1%      |

*Warning: these figures indicate the number of cases found in the data file. They cannot be interpreted as summary statistics of the population of interest.*

**# r7dv13e: Would you have signed: Petition against closing local casualty clinic, 30% signed, people you know/respect**

**Information** [Type= discrete] [Format=numeric] [Range= 1-2] [Missing=\*]

# r7dv13e: Would you have signed: Petition against closing local casualty clinic, 30% signed, people you know/respect

|                            |                                                                                                                                                                                                                                                                                                                                                                                                                                                                                            |  |  |
|----------------------------|--------------------------------------------------------------------------------------------------------------------------------------------------------------------------------------------------------------------------------------------------------------------------------------------------------------------------------------------------------------------------------------------------------------------------------------------------------------------------------------------|--|--|
| Statistics [NW/ W]         | [Valid=4689 /-] [Invalid=0 /-]                                                                                                                                                                                                                                                                                                                                                                                                                                                             |  |  |
| Pre-question               | Imagine the following situation: Politicians are planning to close the casualty clinic closest to you in order to extend the capacity at the nearest hospital. Meaning your journey will be longer should you be in need of immediate medical assistance. A petition against the closure has been established, and it has been published on the internet. Approximately 30 % of the inhabitants of your municipality have signed the petition, and among them people you know and respect. |  |  |
| Literal question           | Would you have signed the petition?                                                                                                                                                                                                                                                                                                                                                                                                                                                        |  |  |
| Interviewer's instructions | [Asked if u=2 and ran12=5. ]                                                                                                                                                                                                                                                                                                                                                                                                                                                               |  |  |

| Value | Label     | Cases | Percentage |
|-------|-----------|-------|------------|
| 1     | Yes       | 88    | 1.9%       |
| 2     | No        | 42    | 0.9%       |
| 97    | No answer | 2     | 0.0%       |
| 98    | Not asked | 4557  | 97.2%      |

Warning: these figures indicate the number of cases found in the data file. They cannot be interpreted as summary statistics of the population of interest.

# r7dv13f: Would you have signed: Petition against closing local casualty clinic, 30% signed, people you don't agree with politically

|                            |                                                                                                                                                                                                                                                                                                                                                                                                                                                                                                                |  |  |
|----------------------------|----------------------------------------------------------------------------------------------------------------------------------------------------------------------------------------------------------------------------------------------------------------------------------------------------------------------------------------------------------------------------------------------------------------------------------------------------------------------------------------------------------------|--|--|
| Information                | [Type= discrete] [Format=numeric] [Range= 1-2] [Missing=*]                                                                                                                                                                                                                                                                                                                                                                                                                                                     |  |  |
| Statistics [NW/ W]         | [Valid=4689 /-] [Invalid=0 /-]                                                                                                                                                                                                                                                                                                                                                                                                                                                                                 |  |  |
| Pre-question               | Imagine the following situation: Politicians are planning to close the casualty clinic closest to you in order to extend the capacity at the nearest hospital. Meaning your journey will be longer should you be in need of immediate medical assistance. A petition against the closure has been established, and it has been published on the internet. Approximately 30 % of the inhabitants of your municipality have signed the petition, and among them people you usually don't agree with politically. |  |  |
| Literal question           | Would you have signed the petition?                                                                                                                                                                                                                                                                                                                                                                                                                                                                            |  |  |
| Interviewer's instructions | [Asked if u=2 and ran12=6. ]                                                                                                                                                                                                                                                                                                                                                                                                                                                                                   |  |  |

| Value | Label     | Cases | Percentage |
|-------|-----------|-------|------------|
| 1     | Yes       | 107   | 2.3%       |
| 2     | No        | 26    | 0.6%       |
| 97    | No answer | 1     | 0.0%       |
| 98    | Not asked | 4555  | 97.1%      |

Warning: these figures indicate the number of cases found in the data file. They cannot be interpreted as summary statistics of the population of interest.

# r7dv13g: Would you have signed: Petition against closing local casualty clinic, 1% signed

|                            |                                                                                                                                                                                                                                                                                                                                                                                                                                               |  |  |
|----------------------------|-----------------------------------------------------------------------------------------------------------------------------------------------------------------------------------------------------------------------------------------------------------------------------------------------------------------------------------------------------------------------------------------------------------------------------------------------|--|--|
| Information                | [Type= discrete] [Format=numeric] [Range= 1-2] [Missing=*]                                                                                                                                                                                                                                                                                                                                                                                    |  |  |
| Statistics [NW/ W]         | [Valid=4689 /-] [Invalid=0 /-]                                                                                                                                                                                                                                                                                                                                                                                                                |  |  |
| Pre-question               | Imagine the following situation: Politicians are planning to close the casualty clinic closest to you in order to extend the capacity at the nearest hospital. Meaning your journey will be longer should you be in need of immediate medical assistance. A petition against the closure has been established, and it has been published on the internet. Approximately 1 % of the inhabitants of your municipality have signed the petition. |  |  |
| Literal question           | Would you have signed the petition?                                                                                                                                                                                                                                                                                                                                                                                                           |  |  |
| Interviewer's instructions | [Asked if u=2 and ran12=7. ]                                                                                                                                                                                                                                                                                                                                                                                                                  |  |  |

| Value | Label     | Cases | Percentage |
|-------|-----------|-------|------------|
| 1     | Yes       | 71    | 1.5%       |
| 2     | No        | 54    | 1.2%       |
| 97    | No answer | 1     | 0.0%       |
| 98    | Not asked | 4563  | 97.3%      |

Warning: these figures indicate the number of cases found in the data file. They cannot be interpreted as summary statistics of the population of interest.

# r7dv13h: Would you have signed: Petition against closing local casualty clinic, 10% signed

|             |                                                            |  |  |
|-------------|------------------------------------------------------------|--|--|
| Information | [Type= discrete] [Format=numeric] [Range= 1-2] [Missing=*] |  |  |
|-------------|------------------------------------------------------------|--|--|

| # r7dv13h: Would you have signed: Petition against closing local casualty clinic, 10% signed                                                                |           |                                                                                                                                                                                                                                                                                                                                                                                                                                                |            |
|-------------------------------------------------------------------------------------------------------------------------------------------------------------|-----------|------------------------------------------------------------------------------------------------------------------------------------------------------------------------------------------------------------------------------------------------------------------------------------------------------------------------------------------------------------------------------------------------------------------------------------------------|------------|
| Statistics [NW/ W]                                                                                                                                          |           | [Valid=4689 /-] [Invalid=0 /-]                                                                                                                                                                                                                                                                                                                                                                                                                 |            |
| Pre-question                                                                                                                                                |           | Imagine the following situation: Politicians are planning to close the casualty clinic closest to you in order to extend the capacity at the nearest hospital. Meaning your journey will be longer should you be in need of immediate medical assistance. A petition against the closure has been established, and it has been published on the internet. Approximately 10 % of the inhabitants of your municipality have signed the petition. |            |
| Literal question                                                                                                                                            |           | Would you have signed the petition?                                                                                                                                                                                                                                                                                                                                                                                                            |            |
| Interviewer's instructions                                                                                                                                  |           | [Asked if u=2 and ran12=8. ]                                                                                                                                                                                                                                                                                                                                                                                                                   |            |
| Value                                                                                                                                                       | Label     | Cases                                                                                                                                                                                                                                                                                                                                                                                                                                          | Percentage |
| 1                                                                                                                                                           | Yes       | 70                                                                                                                                                                                                                                                                                                                                                                                                                                             | 1.5%       |
| 2                                                                                                                                                           | No        | 48                                                                                                                                                                                                                                                                                                                                                                                                                                             | 1.0%       |
| 97                                                                                                                                                          | No answer | 1                                                                                                                                                                                                                                                                                                                                                                                                                                              | 0.0%       |
| 98                                                                                                                                                          | Not asked | 4570                                                                                                                                                                                                                                                                                                                                                                                                                                           | 97.5%      |
| Warning: these figures indicate the number of cases found in the data file. They cannot be interpreted as summary statistics of the population of interest. |           |                                                                                                                                                                                                                                                                                                                                                                                                                                                |            |

| # r7dv13i: Would you have signed: Petition against closing local casualty clinic, 30% signed                                                                |                                                                                                                                                                                                                                                                                                                                                                                                                                                |       |            |
|-------------------------------------------------------------------------------------------------------------------------------------------------------------|------------------------------------------------------------------------------------------------------------------------------------------------------------------------------------------------------------------------------------------------------------------------------------------------------------------------------------------------------------------------------------------------------------------------------------------------|-------|------------|
| Information                                                                                                                                                 | [Type= discrete] [Format=numeric] [Range= 1-2] [Missing=*]                                                                                                                                                                                                                                                                                                                                                                                     |       |            |
| Statistics [NW/ W]                                                                                                                                          | [Valid=4689 /-] [Invalid=0 /-]                                                                                                                                                                                                                                                                                                                                                                                                                 |       |            |
| Pre-question                                                                                                                                                | Imagine the following situation: Politicians are planning to close the casualty clinic closest to you in order to extend the capacity at the nearest hospital. Meaning your journey will be longer should you be in need of immediate medical assistance. A petition against the closure has been established, and it has been published on the internet. Approximately 30 % of the inhabitants of your municipality have signed the petition. |       |            |
| Literal question                                                                                                                                            | Would you have signed the petition?                                                                                                                                                                                                                                                                                                                                                                                                            |       |            |
| Interviewer's instructions                                                                                                                                  | [Asked if u=2 and ran12=9. ]                                                                                                                                                                                                                                                                                                                                                                                                                   |       |            |
| Value                                                                                                                                                       | Label                                                                                                                                                                                                                                                                                                                                                                                                                                          | Cases | Percentage |
| 1                                                                                                                                                           | Yes                                                                                                                                                                                                                                                                                                                                                                                                                                            | 92    | 2.0%       |
| 2                                                                                                                                                           | No                                                                                                                                                                                                                                                                                                                                                                                                                                             | 40    | 0.9%       |
| 97                                                                                                                                                          | No answer                                                                                                                                                                                                                                                                                                                                                                                                                                      | 3     | 0.1%       |
| 98                                                                                                                                                          | Not asked                                                                                                                                                                                                                                                                                                                                                                                                                                      | 4554  | 97.1%      |
| Warning: these figures indicate the number of cases found in the data file. They cannot be interpreted as summary statistics of the population of interest. |                                                                                                                                                                                                                                                                                                                                                                                                                                                |       |            |
| # r7dv13_2: Probability of such an action succeeding                                                                                                        |                                                                                                                                                                                                                                                                                                                                                                                                                                                |       |            |
| Information                                                                                                                                                 | [Type= discrete] [Format=numeric] [Range= 1-5] [Missing=*]                                                                                                                                                                                                                                                                                                                                                                                     |       |            |
| Statistics [NW/ W]                                                                                                                                          | [Valid=4689 /-] [Invalid=0 /-]                                                                                                                                                                                                                                                                                                                                                                                                                 |       |            |
| Literal question                                                                                                                                            | How do you assess the probability of such an action succeeding?                                                                                                                                                                                                                                                                                                                                                                                |       |            |
| Interviewer's instructions                                                                                                                                  | [Asked if u=2. ]                                                                                                                                                                                                                                                                                                                                                                                                                               |       |            |
| Value                                                                                                                                                       | Label                                                                                                                                                                                                                                                                                                                                                                                                                                          | Cases | Percentage |
| 1                                                                                                                                                           | Very likely                                                                                                                                                                                                                                                                                                                                                                                                                                    | 18    | 0.4%       |
| 2                                                                                                                                                           | Likely                                                                                                                                                                                                                                                                                                                                                                                                                                         | 91    | 1.9%       |
| 3                                                                                                                                                           | Somewhat likely                                                                                                                                                                                                                                                                                                                                                                                                                                | 416   | 8.9%       |
| 4                                                                                                                                                           | Slightly likely                                                                                                                                                                                                                                                                                                                                                                                                                                | 562   | 12.0%      |
| 5                                                                                                                                                           | Not likely at all                                                                                                                                                                                                                                                                                                                                                                                                                              | 79    | 1.7%       |
| 97                                                                                                                                                          | No answer                                                                                                                                                                                                                                                                                                                                                                                                                                      | 33    | 0.7%       |
| 98                                                                                                                                                          | Not asked                                                                                                                                                                                                                                                                                                                                                                                                                                      | 3490  | 74.4%      |
| Warning: these figures indicate the number of cases found in the data file. They cannot be interpreted as summary statistics of the population of interest. |                                                                                                                                                                                                                                                                                                                                                                                                                                                |       |            |
| # r7dv13_3: Has participated in a petition on the internet                                                                                                  |                                                                                                                                                                                                                                                                                                                                                                                                                                                |       |            |
| Information                                                                                                                                                 | [Type= discrete] [Format=numeric] [Range= 1-3] [Missing=*]                                                                                                                                                                                                                                                                                                                                                                                     |       |            |
| Statistics [NW/ W]                                                                                                                                          | [Valid=4689 /-] [Invalid=0 /-]                                                                                                                                                                                                                                                                                                                                                                                                                 |       |            |
| Literal question                                                                                                                                            | Have you ever participated in a petition on the internet?                                                                                                                                                                                                                                                                                                                                                                                      |       |            |
| Interviewer's instructions                                                                                                                                  | [Asked if u=2. ]                                                                                                                                                                                                                                                                                                                                                                                                                               |       |            |
| Value                                                                                                                                                       | Label                                                                                                                                                                                                                                                                                                                                                                                                                                          | Cases | Percentage |
| 1                                                                                                                                                           | Yes, several times                                                                                                                                                                                                                                                                                                                                                                                                                             | 327   | 7.0%       |
| 2                                                                                                                                                           | Yes, once                                                                                                                                                                                                                                                                                                                                                                                                                                      | 184   | 3.9%       |
| 3                                                                                                                                                           | No                                                                                                                                                                                                                                                                                                                                                                                                                                             | 658   | 14.0%      |
| 97                                                                                                                                                          | No answer                                                                                                                                                                                                                                                                                                                                                                                                                                      | 30    | 0.6%       |
| 98                                                                                                                                                          | Not asked                                                                                                                                                                                                                                                                                                                                                                                                                                      | 3490  | 74.4%      |
| Warning: these figures indicate the number of cases found in the data file. They cannot be interpreted as summary statistics of the population of interest. |                                                                                                                                                                                                                                                                                                                                                                                                                                                |       |            |
| # r7dv13_3b: What was the last action you participated in about? [anonymized]                                                                               |                                                                                                                                                                                                                                                                                                                                                                                                                                                |       |            |
| Information                                                                                                                                                 | [Type= discrete] [Format=character] [Missing=*]                                                                                                                                                                                                                                                                                                                                                                                                |       |            |
| Statistics [NW/ W]                                                                                                                                          | [Valid=4689 /-] [Invalid=0 /-]                                                                                                                                                                                                                                                                                                                                                                                                                 |       |            |
| Literal question                                                                                                                                            | What was the last action you participated in about?                                                                                                                                                                                                                                                                                                                                                                                            |       |            |

| # r7dv13_3b: What was the last action you participated in about? [anonymized]                                                                                      |                            |                                                                                                                                 |                    |
|--------------------------------------------------------------------------------------------------------------------------------------------------------------------|----------------------------|---------------------------------------------------------------------------------------------------------------------------------|--------------------|
| <b>Interviewer's instructions</b>                                                                                                                                  |                            | [Asked if u=2 and R7DV13_3=1. ]<br><br>[Data withheld for the sake of anonymity]                                                |                    |
| Value                                                                                                                                                              | Label                      | Cases                                                                                                                           | Percentage         |
|                                                                                                                                                                    |                            | 4689                                                                                                                            | <div></div> 100.0% |
| <i>Warning: these figures indicate the number of cases found in the data file. They cannot be interpreted as summary statistics of the population of interest.</i> |                            |                                                                                                                                 |                    |
| # r7dv13_3c: What was the action you participated in about? [anonymized]                                                                                           |                            |                                                                                                                                 |                    |
| <b>Information</b>                                                                                                                                                 |                            | [Type= discrete] [Format=character] [Missing=*]                                                                                 |                    |
| <b>Statistics [NW/ W]</b>                                                                                                                                          |                            | [Valid=4689 /-] [Invalid=0 /-]                                                                                                  |                    |
| <b>Literal question</b>                                                                                                                                            |                            | What was the action you participated in about?                                                                                  |                    |
| <b>Interviewer's instructions</b>                                                                                                                                  |                            | [Asked if u=2 and R7DV13_3=2. ]<br><br>[Data withheld for the sake of anonymity]                                                |                    |
| Value                                                                                                                                                              | Label                      | Cases                                                                                                                           | Percentage         |
|                                                                                                                                                                    |                            | 4689                                                                                                                            | <div></div> 100.0% |
| <i>Warning: these figures indicate the number of cases found in the data file. They cannot be interpreted as summary statistics of the population of interest.</i> |                            |                                                                                                                                 |                    |
| # r7ran6: [Randomizes if u=2. ]                                                                                                                                    |                            |                                                                                                                                 |                    |
| <b>Information</b>                                                                                                                                                 |                            | [Type= discrete] [Format=numeric] [Range= 1-6] [Missing=*]                                                                      |                    |
| <b>Statistics [NW/ W]</b>                                                                                                                                          |                            | [Valid=1178 /-] [Invalid=3511 /-]                                                                                               |                    |
| <b>Interviewer's instructions</b>                                                                                                                                  |                            | [Randomizes if u=2. ]                                                                                                           |                    |
| Value                                                                                                                                                              | Label                      | Cases                                                                                                                           | Percentage         |
| 1                                                                                                                                                                  | 1                          | 187                                                                                                                             | <div></div> 15.9%  |
| 2                                                                                                                                                                  | 2                          | 221                                                                                                                             | <div></div> 18.8%  |
| 3                                                                                                                                                                  | 3                          | 199                                                                                                                             | <div></div> 16.9%  |
| 4                                                                                                                                                                  | 4                          | 195                                                                                                                             | <div></div> 16.6%  |
| 5                                                                                                                                                                  | 5                          | 185                                                                                                                             | <div></div> 15.7%  |
| 6                                                                                                                                                                  | 6                          | 191                                                                                                                             | <div></div> 16.2%  |
| Sysmiss                                                                                                                                                            |                            | 3511                                                                                                                            |                    |
| <i>Warning: these figures indicate the number of cases found in the data file. They cannot be interpreted as summary statistics of the population of interest.</i> |                            |                                                                                                                                 |                    |
| # r7mi5_1: Agree/disagree: Text books for school should be written, more emphasis on the new cultural diversity                                                    |                            |                                                                                                                                 |                    |
| <b>Information</b>                                                                                                                                                 |                            | [Type= discrete] [Format=numeric] [Range= 1-7] [Missing=*]                                                                      |                    |
| <b>Statistics [NW/ W]</b>                                                                                                                                          |                            | [Valid=4689 /-] [Invalid=0 /-]                                                                                                  |                    |
| <b>Pre-question</b>                                                                                                                                                |                            | How much do you agree or disagree with the following statement:                                                                 |                    |
| <b>Literal question</b>                                                                                                                                            |                            | Text books for primary and lower secondary school should be written with more emphasis on the new cultural diversity in Norway. |                    |
| <b>Interviewer's instructions</b>                                                                                                                                  |                            | [Asked if u=2 and ran6=1. ]                                                                                                     |                    |
| <b>Notes</b>                                                                                                                                                       |                            | Hvor enig eller uenig er du i følgende utsagn: Lærebøker i grunnskolen bør skrives slik at de legger mer vekt på det            |                    |
| Value                                                                                                                                                              | Label                      | Cases                                                                                                                           | Percentage         |
| 1                                                                                                                                                                  | Strongly agree             | 11                                                                                                                              | <div></div> 0.2%   |
| 2                                                                                                                                                                  | Agree                      | 38                                                                                                                              | <div></div> 0.8%   |
| 3                                                                                                                                                                  | Somewhat agree             | 47                                                                                                                              | <div></div> 1.0%   |
| 4                                                                                                                                                                  | Neither agree nor disagree | 34                                                                                                                              | <div></div> 0.7%   |
| 5                                                                                                                                                                  | Somewhat disagree          | 16                                                                                                                              | <div></div> 0.3%   |
| 6                                                                                                                                                                  | Disagree                   | 25                                                                                                                              | <div></div> 0.5%   |

| # r7mi5_1: Agree/disagree: Text books for school should be written, more emphasis on the new cultural diversity                                             |                                                                                                                                         |       |            |
|-------------------------------------------------------------------------------------------------------------------------------------------------------------|-----------------------------------------------------------------------------------------------------------------------------------------|-------|------------|
| Value                                                                                                                                                       | Label                                                                                                                                   | Cases | Percentage |
| 7                                                                                                                                                           | Strongly disagree                                                                                                                       | 13    | 0.3%       |
| 97                                                                                                                                                          | No answer                                                                                                                               | 3     | 0.1%       |
| 98                                                                                                                                                          | Not asked                                                                                                                               | 4502  | 96.0%      |
| Warning: these figures indicate the number of cases found in the data file. They cannot be interpreted as summary statistics of the population of interest. |                                                                                                                                         |       |            |
| # r7mi5_2: Agree/disagree: Text books for school should be written, reflect the new cultural diversity                                                      |                                                                                                                                         |       |            |
| Information                                                                                                                                                 | [Type= discrete] [Format=numeric] [Range= 1-7] [Missing=*]                                                                              |       |            |
| Statistics [NW/ W]                                                                                                                                          | [Valid=4689 /-] [Invalid=0 /-]                                                                                                          |       |            |
| Pre-question                                                                                                                                                | How much do you agree or disagree with the following statement:                                                                         |       |            |
| Literal question                                                                                                                                            | Text books for primary and lower secondary school should be written to reflect the new cultural diversity in Norway.                    |       |            |
| Interviewer's instructions                                                                                                                                  | [Asked if u=2 and ran6=2. ]                                                                                                             |       |            |
| Notes                                                                                                                                                       | Hvor enig eller uenig er du i følgende utsagn: Lærebøker i grunnskolen bør skrives slik at de reflekterer det nye kul                   |       |            |
| Value                                                                                                                                                       | Label                                                                                                                                   | Cases | Percentage |
| 1                                                                                                                                                           | Strongly agree                                                                                                                          | 34    | 0.7%       |
| 2                                                                                                                                                           | Agree                                                                                                                                   | 65    | 1.4%       |
| 3                                                                                                                                                           | Somewhat agree                                                                                                                          | 52    | 1.1%       |
| 4                                                                                                                                                           | Neither agree nor disagree                                                                                                              | 30    | 0.6%       |
| 5                                                                                                                                                           | Somewhat disagree                                                                                                                       | 15    | 0.3%       |
| 6                                                                                                                                                           | Disagree                                                                                                                                | 13    | 0.3%       |
| 7                                                                                                                                                           | Strongly disagree                                                                                                                       | 12    | 0.3%       |
| 97                                                                                                                                                          | No answer                                                                                                                               | 0     |            |
| 98                                                                                                                                                          | Not asked                                                                                                                               | 4468  | 95.3%      |
| Warning: these figures indicate the number of cases found in the data file. They cannot be interpreted as summary statistics of the population of interest. |                                                                                                                                         |       |            |
| # r7mi5_3: Agree/disagree: Text books for school should be written, less emphasis on new ideas about cultural diversity                                     |                                                                                                                                         |       |            |
| Information                                                                                                                                                 | [Type= discrete] [Format=numeric] [Range= 1-7] [Missing=*]                                                                              |       |            |
| Statistics [NW/ W]                                                                                                                                          | [Valid=4689 /-] [Invalid=0 /-]                                                                                                          |       |            |
| Pre-question                                                                                                                                                | How much do you agree or disagree with the following statement:                                                                         |       |            |
| Literal question                                                                                                                                            | Text books for primary and lower secondary school should be written with less emphasis on new ideas about cultural diversity in Norway. |       |            |
| Interviewer's instructions                                                                                                                                  | [Asked if u=2 and ran6=3. ]                                                                                                             |       |            |
| Notes                                                                                                                                                       | Hvor enig eller uenig er du i følgende utsagn: Lærebøker i grunnskolen bør skrives slik at de legger mindre vekt på                     |       |            |
| Value                                                                                                                                                       | Label                                                                                                                                   | Cases | Percentage |
| 1                                                                                                                                                           | Strongly agree                                                                                                                          | 5     | 0.1%       |
| 2                                                                                                                                                           | Agree                                                                                                                                   | 11    | 0.2%       |
| 3                                                                                                                                                           | Somewhat agree                                                                                                                          | 26    | 0.6%       |
| 4                                                                                                                                                           | Neither agree nor disagree                                                                                                              | 54    | 1.2%       |
| 5                                                                                                                                                           | Somewhat disagree                                                                                                                       | 30    | 0.6%       |
| 6                                                                                                                                                           | Disagree                                                                                                                                | 46    | 1.0%       |
| 7                                                                                                                                                           | Strongly disagree                                                                                                                       | 24    | 0.5%       |
| 97                                                                                                                                                          | No answer                                                                                                                               | 3     | 0.1%       |
| 98                                                                                                                                                          | Not asked                                                                                                                               | 4490  | 95.8%      |
| Warning: these figures indicate the number of cases found in the data file. They cannot be interpreted as summary statistics of the population of interest. |                                                                                                                                         |       |            |

| # r7mi5_4: Agree/disagree: Text books for school should be re-written, more emphasis on the new cultural diversity                                          |                                                                                                                                                 |       |            |
|-------------------------------------------------------------------------------------------------------------------------------------------------------------|-------------------------------------------------------------------------------------------------------------------------------------------------|-------|------------|
| Information                                                                                                                                                 | [Type= discrete] [Format=numeric] [Range= 1-7] [Missing=*]                                                                                      |       |            |
| Statistics [NW/ W]                                                                                                                                          | [Valid=4689 /-] [Invalid=0 /-]                                                                                                                  |       |            |
| Pre-question                                                                                                                                                | How much do you agree or disagree with the following statement:                                                                                 |       |            |
| Literal question                                                                                                                                            | Text books for primary and lower secondary school should be re-written in order to place more emphasis on the new cultural diversity in Norway. |       |            |
| Interviewer's instructions                                                                                                                                  | [Asked if u=2 and ran6=4. ]                                                                                                                     |       |            |
| Notes                                                                                                                                                       | Hvor enig eller uenig er du i følgende utsagn: Lærebøker i grunnskolen bør omskrives slik at de legger mer vekt på d                            |       |            |
| Value                                                                                                                                                       | Label                                                                                                                                           | Cases | Percentage |
| 1                                                                                                                                                           | Strongly agree                                                                                                                                  | 5     | 0.1%       |
| 2                                                                                                                                                           | Agree                                                                                                                                           | 41    | 0.9%       |
| 3                                                                                                                                                           | Somewhat agree                                                                                                                                  | 53    | 1.1%       |
| 4                                                                                                                                                           | Neither agree nor disagree                                                                                                                      | 36    | 0.8%       |
| 5                                                                                                                                                           | Somewhat disagree                                                                                                                               | 17    | 0.4%       |
| 6                                                                                                                                                           | Disagree                                                                                                                                        | 27    | 0.6%       |
| 7                                                                                                                                                           | Strongly disagree                                                                                                                               | 15    | 0.3%       |
| 97                                                                                                                                                          | No answer                                                                                                                                       | 1     | 0.0%       |
| 98                                                                                                                                                          | Not asked                                                                                                                                       | 4494  | 95.8%      |
| Warning: these figures indicate the number of cases found in the data file. They cannot be interpreted as summary statistics of the population of interest. |                                                                                                                                                 |       |            |
| # r7mi5_5: Agree/disagree: Text books for school should be re-written, reflect the new cultural diversity                                                   |                                                                                                                                                 |       |            |
| Information                                                                                                                                                 | [Type= discrete] [Format=numeric] [Range= 1-7] [Missing=*]                                                                                      |       |            |
| Statistics [NW/ W]                                                                                                                                          | [Valid=4689 /-] [Invalid=0 /-]                                                                                                                  |       |            |
| Pre-question                                                                                                                                                | How much do you agree or disagree with the following statement:                                                                                 |       |            |
| Literal question                                                                                                                                            | Text books for primary and lower secondary school should be re-written to reflect the new cultural diversity in Norway.                         |       |            |
| Interviewer's instructions                                                                                                                                  | [Asked if u=2 and ran6=5. ]                                                                                                                     |       |            |
| Notes                                                                                                                                                       | Hvor enig eller uenig er du i følgende utsagn: Lærebøker i grunnskolen bør omskrives slik at de reflekterer det nye k                           |       |            |
| Value                                                                                                                                                       | Label                                                                                                                                           | Cases | Percentage |
| 1                                                                                                                                                           | Strongly agree                                                                                                                                  | 17    | 0.4%       |
| 2                                                                                                                                                           | Agree                                                                                                                                           | 32    | 0.7%       |
| 3                                                                                                                                                           | Somewhat agree                                                                                                                                  | 49    | 1.0%       |
| 4                                                                                                                                                           | Neither agree nor disagree                                                                                                                      | 27    | 0.6%       |
| 5                                                                                                                                                           | Somewhat disagree                                                                                                                               | 27    | 0.6%       |
| 6                                                                                                                                                           | Disagree                                                                                                                                        | 22    | 0.5%       |
| 7                                                                                                                                                           | Strongly disagree                                                                                                                               | 10    | 0.2%       |
| 97                                                                                                                                                          | No answer                                                                                                                                       | 1     | 0.0%       |
| 98                                                                                                                                                          | Not asked                                                                                                                                       | 4504  | 96.1%      |
| Warning: these figures indicate the number of cases found in the data file. They cannot be interpreted as summary statistics of the population of interest. |                                                                                                                                                 |       |            |
| # r7mi5_6: Agree/disagree: Text books for school should be re-written, less emphasis on new ideas about cultural diversity                                  |                                                                                                                                                 |       |            |
| Information                                                                                                                                                 | [Type= discrete] [Format=numeric] [Range= 1-7] [Missing=*]                                                                                      |       |            |
| Statistics [NW/ W]                                                                                                                                          | [Valid=4689 /-] [Invalid=0 /-]                                                                                                                  |       |            |
| Pre-question                                                                                                                                                | How much do you agree or disagree with the following statement:                                                                                 |       |            |
| Literal question                                                                                                                                            | Text books for primary and lower secondary school should be re-written with less emphasis on new ideas about cultural diversity in Norway.      |       |            |
| Interviewer's instructions                                                                                                                                  | [Asked if u=2 and ran6=6. ]                                                                                                                     |       |            |

## # r7mi5\_6: Agree/disagree: Text books for school should be re-written, less emphasis on new ideas about cultural diversity

**Notes** Hvor enig eller uenig er du i følgende utsagn: Lærebøker i grunnskolen bør omskrives slik at de legger mindre vekt p

| Value | Label                      | Cases | Percentage |
|-------|----------------------------|-------|------------|
| 1     | Strongly agree             | 0     |            |
| 2     | Agree                      | 13    | 0.3%       |
| 3     | Somewhat agree             | 25    | 0.5%       |
| 4     | Neither agree nor disagree | 75    | 1.6%       |
| 5     | Somewhat disagree          | 18    | 0.4%       |
| 6     | Disagree                   | 37    | 0.8%       |
| 7     | Strongly disagree          | 20    | 0.4%       |
| 97    | No answer                  | 3     | 0.1%       |
| 98    | Not asked                  | 4498  | 95.9%      |

*Warning: these figures indicate the number of cases found in the data file. They cannot be interpreted as summary statistics of the population of interest.*

## # r7dvby1: How safe/unsafe do you feel your local area is?

|                                   |                                                                                                                                                    |
|-----------------------------------|----------------------------------------------------------------------------------------------------------------------------------------------------|
| <b>Information</b>                | [Type= discrete] [Format=numeric] [Range= 1-7] [Missing=*]                                                                                         |
| <b>Statistics [NW/ W]</b>         | [Valid=4689 /-] [Invalid=0 /-]                                                                                                                     |
| <b>Pre-question</b>               | Now we would like to know something about your views about society in general, and about the new diversity in Norway.<br>Consider your local area. |
| <b>Literal question</b>           | How safe or unsafe do you feel it is?                                                                                                              |
| <b>Interviewer's instructions</b> | [Asked if u=3 OR u=4. ]                                                                                                                            |
| <b>Notes</b>                      | Vi ønsker nå å få vite noe om dine synspunkter på samfunnet generelt og det nye mangfoldet i Norge. Tenk på ditt                                   |

| Value | Label                   | Cases | Percentage |
|-------|-------------------------|-------|------------|
| 1     | Very safe               | 829   | 17.7%      |
| 2     | Safe                    | 1133  | 24.2%      |
| 3     | Somewhat safe           | 158   | 3.4%       |
| 4     | Neither safe nor unsafe | 54    | 1.2%       |
| 5     | Somewhat unsafe         | 71    | 1.5%       |
| 6     | Unsafe                  | 18    | 0.4%       |
| 7     | Very unsafe             | 4     | 0.1%       |
| 97    | No answer               | 39    | 0.8%       |
| 98    | Not asked               | 2383  | 50.8%      |

*Warning: these figures indicate the number of cases found in the data file. They cannot be interpreted as summary statistics of the population of interest.*

## # r7dvby2: Has your local area become safer/more unsafe/no change last couple of years

|                                   |                                                                                                                                |
|-----------------------------------|--------------------------------------------------------------------------------------------------------------------------------|
| <b>Information</b>                | [Type= discrete] [Format=numeric] [Range= 1-3] [Missing=*]                                                                     |
| <b>Statistics [NW/ W]</b>         | [Valid=4689 /-] [Invalid=0 /-]                                                                                                 |
| <b>Literal question</b>           | In the last couple of years would you say your local area has become safer, more unsafe or has there been no change to safety? |
| <b>Interviewer's instructions</b> | [Asked if u=3 OR u=4. ]                                                                                                        |
| <b>Notes</b>                      | Vil du si at nærmiljøet ditt i de siste par årene har blitt tryggere, mer utrygt eller har det ikke vært noen endring          |

| Value | Label               | Cases | Percentage |
|-------|---------------------|-------|------------|
| 1     | Safer               | 98    | 2.1%       |
| 2     | More unsafe         | 476   | 10.2%      |
| 3     | No change to safety | 1692  | 36.1%      |



| # r7dvby2: Has your local area become safer/more unsafe/no change last couple of years                                                                      |                                                                                                            |       |                              |
|-------------------------------------------------------------------------------------------------------------------------------------------------------------|------------------------------------------------------------------------------------------------------------|-------|------------------------------|
| Value                                                                                                                                                       | Label                                                                                                      | Cases | Percentage                   |
| 97                                                                                                                                                          | No answer                                                                                                  | 40    | <div><div></div></div> 0.9%  |
| 98                                                                                                                                                          | Not asked                                                                                                  | 2383  | <div><div></div></div> 50.8% |
| Warning: these figures indicate the number of cases found in the data file. They cannot be interpreted as summary statistics of the population of interest. |                                                                                                            |       |                              |
| # r7dv5: Advantage/disadvantage for Norway that immigrants come to live here?                                                                               |                                                                                                            |       |                              |
| Information                                                                                                                                                 | [Type= discrete] [Format=numeric] [Range= 1-7] [Missing=*]                                                 |       |                              |
| Statistics [NW/ W]                                                                                                                                          | [Valid=4689 /-] [Invalid=0 /-]                                                                             |       |                              |
| Literal question                                                                                                                                            | In your opinion how great an advantage or disadvantage is it for Norway that immigrants come to live here? |       |                              |
| Interviewer's instructions                                                                                                                                  | [Asked if u=4. ]                                                                                           |       |                              |
| Notes                                                                                                                                                       | Hvor stor fordel eller ulempe vil du si at det er for Norge at innvandrere kommer for å bosette seg her?   |       |                              |
| Value                                                                                                                                                       | Label                                                                                                      | Cases | Percentage                   |
| 1                                                                                                                                                           | Very great advantage                                                                                       | 26    | <div><div></div></div> 0.6%  |
| 2                                                                                                                                                           | Great advantage                                                                                            | 175   | <div><div></div></div> 3.7%  |
| 3                                                                                                                                                           | An advantage to some extent                                                                                | 419   | <div><div></div></div> 8.9%  |
| 4                                                                                                                                                           | Neither an advantage nor a disadvantage                                                                    | 189   | <div><div></div></div> 4.0%  |
| 5                                                                                                                                                           | A disadvantage to some extent                                                                              | 241   | <div><div></div></div> 5.1%  |
| 6                                                                                                                                                           | Great disadvantage                                                                                         | 92    | <div><div></div></div> 2.0%  |
| 7                                                                                                                                                           | Very great disadvantage                                                                                    | 44    | <div><div></div></div> 0.9%  |
| 97                                                                                                                                                          | No answer                                                                                                  | 17    | <div><div></div></div> 0.4%  |
| 98                                                                                                                                                          | Not asked                                                                                                  | 3486  | <div><div></div></div> 74.3% |
| Warning: these figures indicate the number of cases found in the data file. They cannot be interpreted as summary statistics of the population of interest. |                                                                                                            |       |                              |
| # r7dv6: How important is immigration policy to you?                                                                                                        |                                                                                                            |       |                              |
| Information                                                                                                                                                 | [Type= discrete] [Format=numeric] [Range= 1-5] [Missing=*]                                                 |       |                              |
| Statistics [NW/ W]                                                                                                                                          | [Valid=4689 /-] [Invalid=0 /-]                                                                             |       |                              |
| Literal question                                                                                                                                            | How important is immigration policy to you personally?                                                     |       |                              |
| Interviewer's instructions                                                                                                                                  | [Asked if u=4. ]                                                                                           |       |                              |
| Value                                                                                                                                                       | Label                                                                                                      | Cases | Percentage                   |
| 1                                                                                                                                                           | Very important                                                                                             | 152   | <div><div></div></div> 3.2%  |
| 2                                                                                                                                                           | Important                                                                                                  | 466   | <div><div></div></div> 9.9%  |
| 3                                                                                                                                                           | Somewhat important                                                                                         | 440   | <div><div></div></div> 9.4%  |
| 4                                                                                                                                                           | Slightly important                                                                                         | 113   | <div><div></div></div> 2.4%  |
| 5                                                                                                                                                           | Not important at all                                                                                       | 15    | <div><div></div></div> 0.3%  |
| 97                                                                                                                                                          | No answer                                                                                                  | 17    | <div><div></div></div> 0.4%  |
| 98                                                                                                                                                          | Not asked                                                                                                  | 3486  | <div><div></div></div> 74.3% |
| Warning: these figures indicate the number of cases found in the data file. They cannot be interpreted as summary statistics of the population of interest. |                                                                                                            |       |                              |
| # r7dv7: Party with the best immigration policy                                                                                                             |                                                                                                            |       |                              |
| Information                                                                                                                                                 | [Type= discrete] [Format=numeric] [Range= 1-11] [Missing=*]                                                |       |                              |
| Statistics [NW/ W]                                                                                                                                          | [Valid=4689 /-] [Invalid=0 /-]                                                                             |       |                              |
| Literal question                                                                                                                                            | Which party do you think has the best immigration policy?                                                  |       |                              |
| Interviewer's instructions                                                                                                                                  | [Asked if u=4. ]                                                                                           |       |                              |
| Value                                                                                                                                                       | Label                                                                                                      | Cases | Percentage                   |
| 1                                                                                                                                                           | The Labour Party                                                                                           | 210   | <div><div></div></div> 4.5%  |
| 2                                                                                                                                                           | The Progress Party                                                                                         | 306   | <div><div></div></div> 6.5%  |

| # r7dv7: Party with the best immigration policy                                                                                                             |                                                                                                                                                             |       |                               |
|-------------------------------------------------------------------------------------------------------------------------------------------------------------|-------------------------------------------------------------------------------------------------------------------------------------------------------------|-------|-------------------------------|
| Value                                                                                                                                                       | Label                                                                                                                                                       | Cases | Percentage                    |
| 3                                                                                                                                                           | The Conservative Party                                                                                                                                      | 158   | <div><div></div></div> 3.4%   |
| 4                                                                                                                                                           | The Socialist Left Party                                                                                                                                    | 92    | <div><div></div></div> 2.0%   |
| 5                                                                                                                                                           | The Centre Party                                                                                                                                            | 29    | <div><div></div></div> 0.6%   |
| 6                                                                                                                                                           | The Christian Democrats                                                                                                                                     | 68    | <div><div></div></div> 1.5%   |
| 7                                                                                                                                                           | The Liberal Party                                                                                                                                           | 59    | <div><div></div></div> 1.3%   |
| 8                                                                                                                                                           | The Red Party                                                                                                                                               | 21    | <div><div></div></div> 0.4%   |
| 9                                                                                                                                                           | The Green Party                                                                                                                                             | 6     | <div><div></div></div> 0.1%   |
| 10                                                                                                                                                          | Other                                                                                                                                                       | 14    | <div><div></div></div> 0.3%   |
| 11                                                                                                                                                          | None                                                                                                                                                        | 195   | <div><div></div></div> 4.2%   |
| 97                                                                                                                                                          | No answer                                                                                                                                                   | 45    | <div><div></div></div> 1.0%   |
| 98                                                                                                                                                          | Not asked                                                                                                                                                   | 3486  | <div><div></div></div> 74.3%  |
| Warning: these figures indicate the number of cases found in the data file. They cannot be interpreted as summary statistics of the population of interest. |                                                                                                                                                             |       |                               |
| # r7dv7_10_other: Party with the best immigration policy, other [anonymized]                                                                                |                                                                                                                                                             |       |                               |
| Information                                                                                                                                                 | [Type= discrete] [Format=character] [Missing=*]                                                                                                             |       |                               |
| Statistics [NW/ W]                                                                                                                                          | [Valid=4689 /-] [Invalid=0 /-]                                                                                                                              |       |                               |
| Literal question                                                                                                                                            | Which party do you think has the best immigration policy?                                                                                                   |       |                               |
| Interviewer's instructions                                                                                                                                  | [Asked if u=4. ]<br><br>[Data withheld for the sake of anonymity]                                                                                           |       |                               |
| Value                                                                                                                                                       | Label                                                                                                                                                       | Cases | Percentage                    |
|                                                                                                                                                             |                                                                                                                                                             | 4689  | <div><div></div></div> 100.0% |
| Warning: these figures indicate the number of cases found in the data file. They cannot be interpreted as summary statistics of the population of interest. |                                                                                                                                                             |       |                               |
| # r7ran7: [Randomizes if u=4. ]                                                                                                                             |                                                                                                                                                             |       |                               |
| Information                                                                                                                                                 | [Type= discrete] [Format=numeric] [Range= 1-6] [Missing=*]                                                                                                  |       |                               |
| Statistics [NW/ W]                                                                                                                                          | [Valid=1192 /-] [Invalid=3497 /-]                                                                                                                           |       |                               |
| Interviewer's instructions                                                                                                                                  | [Randomizes if u=4. ]                                                                                                                                       |       |                               |
| Value                                                                                                                                                       | Label                                                                                                                                                       | Cases | Percentage                    |
| 1                                                                                                                                                           | 1                                                                                                                                                           | 196   | <div><div></div></div> 16.4%  |
| 2                                                                                                                                                           | 2                                                                                                                                                           | 208   | <div><div></div></div> 17.4%  |
| 3                                                                                                                                                           | 3                                                                                                                                                           | 199   | <div><div></div></div> 16.7%  |
| 4                                                                                                                                                           | 4                                                                                                                                                           | 186   | <div><div></div></div> 15.6%  |
| 5                                                                                                                                                           | 5                                                                                                                                                           | 198   | <div><div></div></div> 16.6%  |
| 6                                                                                                                                                           | 6                                                                                                                                                           | 205   | <div><div></div></div> 17.2%  |
| Sysmiss                                                                                                                                                     |                                                                                                                                                             | 3497  |                               |
| Warning: these figures indicate the number of cases found in the data file. They cannot be interpreted as summary statistics of the population of interest. |                                                                                                                                                             |       |                               |
| # r7dvex1_1: Should party be prohibited from standing for election: You disagree with all standpoints                                                       |                                                                                                                                                             |       |                               |
| Information                                                                                                                                                 | [Type= discrete] [Format=numeric] [Range= 1-2] [Missing=*]                                                                                                  |       |                               |
| Statistics [NW/ W]                                                                                                                                          | [Valid=4689 /-] [Invalid=0 /-]                                                                                                                              |       |                               |
| Pre-question                                                                                                                                                | Imagine that a political party where you strongly disagree with all their standpoints wishes to stand for election to the Storting in Norway in the autumn. |       |                               |
| Literal question                                                                                                                                            | Do you feel that such a party should be prohibited from standing for election?                                                                              |       |                               |
| Interviewer's instructions                                                                                                                                  | [Asked if u=4 and ran7=1. ]                                                                                                                                 |       |                               |
| Notes                                                                                                                                                       | Forestill deg at et politisk parti som du er dypt uenig med i alle saker ønsker å stille til Stortingsvalg i Norge til                                      |       |                               |

| # r7dvex1_1: Should party be prohibited from standing for election: You disagree with all standpoints                                                       |                                                                                                                                                    |       |            |
|-------------------------------------------------------------------------------------------------------------------------------------------------------------|----------------------------------------------------------------------------------------------------------------------------------------------------|-------|------------|
| Value                                                                                                                                                       | Label                                                                                                                                              | Cases | Percentage |
| 1                                                                                                                                                           | Yes                                                                                                                                                | 27    | 0.6%       |
| 2                                                                                                                                                           | No                                                                                                                                                 | 167   | 3.6%       |
| 97                                                                                                                                                          | No answer                                                                                                                                          | 2     | 0.0%       |
| 98                                                                                                                                                          | Not asked                                                                                                                                          | 4493  | 95.8%      |
| Warning: these figures indicate the number of cases found in the data file. They cannot be interpreted as summary statistics of the population of interest. |                                                                                                                                                    |       |            |
| # r7dvex1_2: Should party be prohibited from standing for election: Promotes undemocratic values                                                            |                                                                                                                                                    |       |            |
| Information                                                                                                                                                 | [Type= discrete] [Format=numeric] [Range= 1-2] [Missing=*]                                                                                         |       |            |
| Statistics [NW/ W]                                                                                                                                          | [Valid=4689 /-] [Invalid=0 /-]                                                                                                                     |       |            |
| Pre-question                                                                                                                                                | Imagine that a political party that promotes undemocratic values wishes to stand for election to the Storting in Norway in the autumn.             |       |            |
| Literal question                                                                                                                                            | Do you feel that such a party should be prohibited from standing for election?                                                                     |       |            |
| Interviewer's instructions                                                                                                                                  | [Asked if u=4 and ran7=2. ]                                                                                                                        |       |            |
| Notes                                                                                                                                                       | Forestill deg at et politisk parti som fremmer udemokratiske verdier ønsker å stille til Stortingsvalg i Norge til høst                            |       |            |
| Value                                                                                                                                                       | Label                                                                                                                                              | Cases | Percentage |
| 1                                                                                                                                                           | Yes                                                                                                                                                | 94    | 2.0%       |
| 2                                                                                                                                                           | No                                                                                                                                                 | 105   | 2.2%       |
| 97                                                                                                                                                          | No answer                                                                                                                                          | 9     | 0.2%       |
| 98                                                                                                                                                          | Not asked                                                                                                                                          | 4481  | 95.6%      |
| Warning: these figures indicate the number of cases found in the data file. They cannot be interpreted as summary statistics of the population of interest. |                                                                                                                                                    |       |            |
| # r7dvex1_3: Should party be prohibited from standing for election: Does not respect democratic ground rules                                                |                                                                                                                                                    |       |            |
| Information                                                                                                                                                 | [Type= discrete] [Format=numeric] [Range= 1-2] [Missing=*]                                                                                         |       |            |
| Statistics [NW/ W]                                                                                                                                          | [Valid=4689 /-] [Invalid=0 /-]                                                                                                                     |       |            |
| Pre-question                                                                                                                                                | Imagine that a political party that does not respect democratic ground rules wishes to stand for election to the Storting in Norway in the autumn. |       |            |
| Literal question                                                                                                                                            | Do you feel that such a party should be prohibited from standing for election?                                                                     |       |            |
| Interviewer's instructions                                                                                                                                  | [Asked if u=4 and ran7=3. ]                                                                                                                        |       |            |
| Notes                                                                                                                                                       | Forestill deg at et politisk parti som ikke respekterer demokratiske spilleregler ønsker å stille til Stortingsvalg i                              |       |            |
| Value                                                                                                                                                       | Label                                                                                                                                              | Cases | Percentage |
| 1                                                                                                                                                           | Yes                                                                                                                                                | 95    | 2.0%       |
| 2                                                                                                                                                           | No                                                                                                                                                 | 99    | 2.1%       |
| 97                                                                                                                                                          | No answer                                                                                                                                          | 5     | 0.1%       |
| 98                                                                                                                                                          | Not asked                                                                                                                                          | 4490  | 95.8%      |
| Warning: these figures indicate the number of cases found in the data file. They cannot be interpreted as summary statistics of the population of interest. |                                                                                                                                                    |       |            |
| # r7dvex1_4: Should party be prohibited from standing for election: Does not respect Norwegian legislation                                                  |                                                                                                                                                    |       |            |
| Information                                                                                                                                                 | [Type= discrete] [Format=numeric] [Range= 1-2] [Missing=*]                                                                                         |       |            |
| Statistics [NW/ W]                                                                                                                                          | [Valid=4689 /-] [Invalid=0 /-]                                                                                                                     |       |            |
| Pre-question                                                                                                                                                | Imagine that a political party that does not respect Norwegian legislation wishes to stand for election to the Storting in Norway in the autumn.   |       |            |
| Literal question                                                                                                                                            | Do you feel that such a party should be prohibited from standing for election?                                                                     |       |            |
| Interviewer's instructions                                                                                                                                  | [Asked if u=4 and ran7=4. ]                                                                                                                        |       |            |
| Notes                                                                                                                                                       | Forestill deg at et politisk parti som ikke respekterer norsk lov ønsker å stille til Stortingsvalg i Norge til høsten                             |       |            |

| # r7dvex1_4: Should party be prohibited from standing for election: Does not respect Norwegian legislation                                                  |                                                                                                                                                  |       |            |
|-------------------------------------------------------------------------------------------------------------------------------------------------------------|--------------------------------------------------------------------------------------------------------------------------------------------------|-------|------------|
| Value                                                                                                                                                       | Label                                                                                                                                            | Cases | Percentage |
| 1                                                                                                                                                           | Yes                                                                                                                                              | 119   | 2.5%       |
| 2                                                                                                                                                           | No                                                                                                                                               | 65    | 1.4%       |
| 97                                                                                                                                                          | No answer                                                                                                                                        | 2     | 0.0%       |
| 98                                                                                                                                                          | Not asked                                                                                                                                        | 4503  | 96.0%      |
| Warning: these figures indicate the number of cases found in the data file. They cannot be interpreted as summary statistics of the population of interest. |                                                                                                                                                  |       |            |
| # r7dvex1_5: Should party be prohibited from standing for election: Used violence to achieve its goals                                                      |                                                                                                                                                  |       |            |
| Information                                                                                                                                                 | [Type= discrete] [Format=numeric] [Range= 1-2] [Missing=*]                                                                                       |       |            |
| Statistics [NW/ W]                                                                                                                                          | [Valid=4689 /-] [Invalid=0 /-]                                                                                                                   |       |            |
| Pre-question                                                                                                                                                | Imagine that a political party that has used violence to achieve its goals wishes to stand for election to the Storting in Norway in the autumn. |       |            |
| Literal question                                                                                                                                            | Do you feel that such a party should be prohibited from standing for election?                                                                   |       |            |
| Interviewer's instructions                                                                                                                                  | [Asked if u=4 and ran7=5. ]                                                                                                                      |       |            |
| Notes                                                                                                                                                       | Forestill deg at et politisk parti som har brukt vold for å oppnå sine mål ønsker å stille til Stortingsvalg i Norge                             |       |            |
| Value                                                                                                                                                       | Label                                                                                                                                            | Cases | Percentage |
| 1                                                                                                                                                           | Yes                                                                                                                                              | 134   | 2.9%       |
| 2                                                                                                                                                           | No                                                                                                                                               | 61    | 1.3%       |
| 97                                                                                                                                                          | No answer                                                                                                                                        | 3     | 0.1%       |
| 98                                                                                                                                                          | Not asked                                                                                                                                        | 4491  | 95.8%      |
| Warning: these figures indicate the number of cases found in the data file. They cannot be interpreted as summary statistics of the population of interest. |                                                                                                                                                  |       |            |
| # r7dvex1_6: Should party be prohibited from standing for election: Responsible for a terrorist attack                                                      |                                                                                                                                                  |       |            |
| Information                                                                                                                                                 | [Type= discrete] [Format=numeric] [Range= 1-2] [Missing=*]                                                                                       |       |            |
| Statistics [NW/ W]                                                                                                                                          | [Valid=4689 /-] [Invalid=0 /-]                                                                                                                   |       |            |
| Pre-question                                                                                                                                                | Imagine that a political party that is responsible for a terrorist attack wishes to stand for election to the Storting in Norway in the autumn.  |       |            |
| Literal question                                                                                                                                            | Do you feel that such a party should be prohibited from standing for election?                                                                   |       |            |
| Interviewer's instructions                                                                                                                                  | [Asked if u=4 and ran7=6. ]                                                                                                                      |       |            |
| Notes                                                                                                                                                       | Forestill deg at et politisk parti som er ansvarlig for et terrorangrep ønsker å stille til Stortingsvalg i Norge til h                          |       |            |
| Value                                                                                                                                                       | Label                                                                                                                                            | Cases | Percentage |
| 1                                                                                                                                                           | Yes                                                                                                                                              | 135   | 2.9%       |
| 2                                                                                                                                                           | No                                                                                                                                               | 68    | 1.5%       |
| 97                                                                                                                                                          | No answer                                                                                                                                        | 2     | 0.0%       |
| 98                                                                                                                                                          | Not asked                                                                                                                                        | 4484  | 95.6%      |
| Warning: these figures indicate the number of cases found in the data file. They cannot be interpreted as summary statistics of the population of interest. |                                                                                                                                                  |       |            |
| # r7dvby5: How often do you spot persons you believe/know to be asylum seekers during a normal week                                                         |                                                                                                                                                  |       |            |
| Information                                                                                                                                                 | [Type= discrete] [Format=numeric] [Range= 1-6] [Missing=*]                                                                                       |       |            |
| Statistics [NW/ W]                                                                                                                                          | [Valid=4689 /-] [Invalid=0 /-]                                                                                                                   |       |            |
| Literal question                                                                                                                                            | How often do you spot persons you believe or know to be asylum seekers where you go during a normal week?                                        |       |            |
| Interviewer's instructions                                                                                                                                  | [Asked if u=3 OR u=4. ]                                                                                                                          |       |            |
| Notes                                                                                                                                                       | Hvor ofte ser du personer du antar eller vet er asylsøkere der du ferdes i løpet av en vanlig uke?                                               |       |            |
| Value                                                                                                                                                       | Label                                                                                                                                            | Cases | Percentage |
| 1                                                                                                                                                           | Never                                                                                                                                            | 181   | 3.9%       |
| 2                                                                                                                                                           | Once a week                                                                                                                                      | 436   | 9.3%       |

### # r7dvby5: How often do you spot persons you believe/know to be asylum seekers during a normal week

| Value | Label               | Cases | Percentage |
|-------|---------------------|-------|------------|
| 3     | 2-3 times a week    | 523   | 11.2%      |
| 4     | 4-6 times a week    | 289   | 6.2%       |
| 5     | Daily               | 536   | 11.4%      |
| 6     | Several times a day | 278   | 5.9%       |
| 97    | No answer           | 63    | 1.3%       |
| 98    | Not asked           | 2383  | 50.8%      |

Warning: these figures indicate the number of cases found in the data file. They cannot be interpreted as summary statistics of the population of interest.

### # r7dvby6: Amount of contact with asylum seekers

|                                   |                                                                                              |
|-----------------------------------|----------------------------------------------------------------------------------------------|
| <b>Information</b>                | [Type= discrete] [Format=numeric] [Range= 1-7] [Missing=*]                                   |
| <b>Statistics [NW/ W]</b>         | [Valid=4689 /-] [Invalid=0 /-]                                                               |
| <b>Pre-question</b>               | We are interested to know how much contact you have had with asylum seekers.                 |
| <b>Literal question</b>           | Would you say that you have had....                                                          |
| <b>Interviewer's instructions</b> | [Asked if u=3 OR u=4. ]                                                                      |
| <b>Notes</b>                      | Vi er interessert i hvor mye kontakt du har hatt med asylsøkere. Vil du si at du har hatt... |

| Value | Label                  | Cases | Percentage |
|-------|------------------------|-------|------------|
| 1     | No contact             | 647   | 13.8%      |
| 2     | Very little contact    | 785   | 16.7%      |
| 3     | A little contact       | 454   | 9.7%       |
| 4     | Some contact           | 200   | 4.3%       |
| 5     | Quite a bit of contact | 76    | 1.6%       |
| 6     | A lot of contact       | 53    | 1.1%       |
| 7     | Quite a lot of contact | 27    | 0.6%       |
| 97    | No answer              | 64    | 1.4%       |
| 98    | Not asked              | 2383  | 50.8%      |

Warning: these figures indicate the number of cases found in the data file. They cannot be interpreted as summary statistics of the population of interest.

### # r7dvby7: Contact with asylum seekers has been positive/negative

|                                   |                                                                                                 |
|-----------------------------------|-------------------------------------------------------------------------------------------------|
| <b>Information</b>                | [Type= discrete] [Format=numeric] [Range= 1-7] [Missing=*]                                      |
| <b>Statistics [NW/ W]</b>         | [Valid=4689 /-] [Invalid=0 /-]                                                                  |
| <b>Literal question</b>           | In general, to what degree have you found the contact you have had to be negative or positive.  |
| <b>Interviewer's instructions</b> | [Asked if u=3 OR u=4, and if R7DVBY6>1. ]                                                       |
| <b>Notes</b>                      | Samlet sett, i hvilken grad har du opplevd den kontakten du har hatt som negativ eller positiv? |

| Value | Label                                | Cases | Percentage |
|-------|--------------------------------------|-------|------------|
| 1     | Exclusively negative                 | 12    | 0.3%       |
| 2     | Mostly negative                      | 52    | 1.1%       |
| 3     | Somewhat more negative than positive | 88    | 1.9%       |
| 4     | A mixture of negative and positive   | 347   | 7.4%       |
| 5     | Somewhat more positive than negative | 237   | 5.1%       |
| 6     | Mostly positive                      | 622   | 13.3%      |
| 7     | Exclusively positive                 | 204   | 4.4%       |
| 97    | No answer                            | 453   | 9.7%       |
| 98    | Not asked                            | 2674  | 57.0%      |

Warning: these figures indicate the number of cases found in the data file. They cannot be interpreted as summary statistics of the population of interest.

| # r7dvby8: Has asylum seekers' centre in local area                                                                                                         |                                                                                                                         |       |                              |
|-------------------------------------------------------------------------------------------------------------------------------------------------------------|-------------------------------------------------------------------------------------------------------------------------|-------|------------------------------|
| Information                                                                                                                                                 | [Type= discrete] [Format=numeric] [Range= 1-3] [Missing=*]                                                              |       |                              |
| Statistics [NW/ W]                                                                                                                                          | [Valid=4689 /-] [Invalid=0 /-]                                                                                          |       |                              |
| Pre-question                                                                                                                                                | Recently more asylum seekers' centres have been both established and closed down in Norway.                             |       |                              |
| Literal question                                                                                                                                            | Do you have an asylum seekers' centre in your local area?                                                               |       |                              |
| Interviewer's instructions                                                                                                                                  | [Asked if u=3 OR u=4. ]                                                                                                 |       |                              |
| Notes                                                                                                                                                       | Det har den siste tiden blitt både opprettet og lagt ned flere asylmottak i Norge. Har du et asylmottak i ditt nærmiljø |       |                              |
| Value                                                                                                                                                       | Label                                                                                                                   | Cases | Percentage                   |
| 1                                                                                                                                                           | Yes                                                                                                                     | 698   | <div><div></div></div> 14.9% |
| 2                                                                                                                                                           | No                                                                                                                      | 1164  | <div><div></div></div> 24.8% |
| 3                                                                                                                                                           | Don't know                                                                                                              | 391   | <div><div></div></div> 8.3%  |
| 97                                                                                                                                                          | No answer                                                                                                               | 53    | <div><div></div></div> 1.1%  |
| 98                                                                                                                                                          | Not asked                                                                                                               | 2383  | <div><div></div></div> 50.8% |
| Warning: these figures indicate the number of cases found in the data file. They cannot be interpreted as summary statistics of the population of interest. |                                                                                                                         |       |                              |
| # r7dvby8aja: When was the asylum seekers' centre established?                                                                                              |                                                                                                                         |       |                              |
| Information                                                                                                                                                 | [Type= discrete] [Format=numeric] [Range= 1-9] [Missing=*]                                                              |       |                              |
| Statistics [NW/ W]                                                                                                                                          | [Valid=4689 /-] [Invalid=0 /-]                                                                                          |       |                              |
| Literal question                                                                                                                                            | Are you able to estimate when the asylum seekers' centre was established?                                               |       |                              |
| Interviewer's instructions                                                                                                                                  | [Asked if u=3 and R7DVBY8=1. ]                                                                                          |       |                              |
| Value                                                                                                                                                       | Label                                                                                                                   | Cases | Percentage                   |
| 1                                                                                                                                                           | Recently (last half of 2016)                                                                                            | 10    | <div><div></div></div> 0.2%  |
| 2                                                                                                                                                           | Earlier this year (first half of 2016)                                                                                  | 36    | <div><div></div></div> 0.8%  |
| 3                                                                                                                                                           | In the Autumn last year (last half of 2015)                                                                             | 71    | <div><div></div></div> 1.5%  |
| 4                                                                                                                                                           | In the Spring last year (first half of 2015)                                                                            | 35    | <div><div></div></div> 0.7%  |
| 5                                                                                                                                                           | 2 years ago (approximately 2014)                                                                                        | 33    | <div><div></div></div> 0.7%  |
| 6                                                                                                                                                           | 3 years ago (approximately 2013)                                                                                        | 10    | <div><div></div></div> 0.2%  |
| 7                                                                                                                                                           | 4 years ago (approximately 2012)                                                                                        | 16    | <div><div></div></div> 0.3%  |
| 8                                                                                                                                                           | 5 years ago (approximately 2011)                                                                                        | 19    | <div><div></div></div> 0.4%  |
| 9                                                                                                                                                           | 6 years or more ago (approximately 2010 or earlier)                                                                     | 77    | <div><div></div></div> 1.6%  |
| 97                                                                                                                                                          | No answer                                                                                                               | 2     | <div><div></div></div> 0.0%  |
| 98                                                                                                                                                          | Not asked                                                                                                               | 4380  | <div><div></div></div> 93.4% |
| Warning: these figures indicate the number of cases found in the data file. They cannot be interpreted as summary statistics of the population of interest. |                                                                                                                         |       |                              |
| # r7dvby8bja: Distance from asylum seekers' centre to where you live                                                                                        |                                                                                                                         |       |                              |
| Information                                                                                                                                                 | [Type= discrete] [Format=numeric] [Range= 1-7] [Missing=*]                                                              |       |                              |
| Statistics [NW/ W]                                                                                                                                          | [Valid=4689 /-] [Invalid=0 /-]                                                                                          |       |                              |
| Literal question                                                                                                                                            | Approximately what distance is it from the Asylum seekers' centre to where you live?                                    |       |                              |
| Interviewer's instructions                                                                                                                                  | [Asked if u=3 and R7DVBY8=1. ]                                                                                          |       |                              |
| Value                                                                                                                                                       | Label                                                                                                                   | Cases | Percentage                   |
| 1                                                                                                                                                           | The Asylum seekers' centre is next door                                                                                 | 15    | <div><div></div></div> 0.3%  |
| 2                                                                                                                                                           | 1 km                                                                                                                    | 48    | <div><div></div></div> 1.0%  |
| 3                                                                                                                                                           | 2 km                                                                                                                    | 46    | <div><div></div></div> 1.0%  |
| 4                                                                                                                                                           | 3 km                                                                                                                    | 44    | <div><div></div></div> 0.9%  |
| 5                                                                                                                                                           | 4 km                                                                                                                    | 30    | <div><div></div></div> 0.6%  |
| 6                                                                                                                                                           | 5 km                                                                                                                    | 37    | <div><div></div></div> 0.8%  |

| # r7dvby8bja: Distance from asylum seekers' centre to where you live                                                                                        |                                                                                       |       |            |
|-------------------------------------------------------------------------------------------------------------------------------------------------------------|---------------------------------------------------------------------------------------|-------|------------|
| Value                                                                                                                                                       | Label                                                                                 | Cases | Percentage |
| 7                                                                                                                                                           | More than 5 km                                                                        | 89    | 1.9%       |
| 97                                                                                                                                                          | No answer                                                                             | 0     |            |
| 98                                                                                                                                                          | Not asked                                                                             | 4380  | 93.4%      |
| Warning: these figures indicate the number of cases found in the data file. They cannot be interpreted as summary statistics of the population of interest. |                                                                                       |       |            |
| # r7dvby8anej: Have you had an asylum seekers' centre in your local area previously?                                                                        |                                                                                       |       |            |
| Information                                                                                                                                                 | [Type= discrete] [Format=numeric] [Range= 1-3] [Missing=*]                            |       |            |
| Statistics [NW/ W]                                                                                                                                          | [Valid=4689 /-] [Invalid=0 /-]                                                        |       |            |
| Literal question                                                                                                                                            | Have you had an asylum seekers' centre in your local area previously?                 |       |            |
| Interviewer's instructions                                                                                                                                  | [Asked if u=3 and R7DVBY8>1. ]                                                        |       |            |
| Value                                                                                                                                                       | Label                                                                                 | Cases | Percentage |
| 1                                                                                                                                                           | Yes                                                                                   | 133   | 2.8%       |
| 2                                                                                                                                                           | No                                                                                    | 434   | 9.3%       |
| 3                                                                                                                                                           | Don't know                                                                            | 197   | 4.2%       |
| 97                                                                                                                                                          | No answer                                                                             | 30    | 0.6%       |
| 98                                                                                                                                                          | Not asked                                                                             | 3895  | 83.1%      |
| Warning: these figures indicate the number of cases found in the data file. They cannot be interpreted as summary statistics of the population of interest. |                                                                                       |       |            |
| # r7dvby8aneija1: When was the asylum seekers' centre closed down?                                                                                          |                                                                                       |       |            |
| Information                                                                                                                                                 | [Type= discrete] [Format=numeric] [Range= 1-9] [Missing=*]                            |       |            |
| Statistics [NW/ W]                                                                                                                                          | [Valid=4689 /-] [Invalid=0 /-]                                                        |       |            |
| Literal question                                                                                                                                            | Are you able to estimate when the asylum seekers' centre was closed down?             |       |            |
| Interviewer's instructions                                                                                                                                  | [Asked if u=3 and R7DVBY8aNEI=1. ]                                                    |       |            |
| Value                                                                                                                                                       | Label                                                                                 | Cases | Percentage |
| 1                                                                                                                                                           | Recently (last half of 2016)                                                          | 21    | 0.4%       |
| 2                                                                                                                                                           | Earlier this year (first half of 2016)                                                | 36    | 0.8%       |
| 3                                                                                                                                                           | In the Autumn last year (last half of 2015)                                           | 10    | 0.2%       |
| 4                                                                                                                                                           | In the Spring last year (first half of 2015)                                          | 6     | 0.1%       |
| 5                                                                                                                                                           | 2 years ago (approximately 2014)                                                      | 12    | 0.3%       |
| 6                                                                                                                                                           | 3 years ago (approximately 2013)                                                      | 7     | 0.1%       |
| 7                                                                                                                                                           | 4 years ago (approximately 2012)                                                      | 7     | 0.1%       |
| 8                                                                                                                                                           | 5 years ago (approximately 2011)                                                      | 5     | 0.1%       |
| 9                                                                                                                                                           | 6 years or more ago (approximately 2010 or earlier)                                   | 26    | 0.6%       |
| 97                                                                                                                                                          | No answer                                                                             | 3     | 0.1%       |
| 98                                                                                                                                                          | Not asked                                                                             | 4556  | 97.2%      |
| Warning: these figures indicate the number of cases found in the data file. They cannot be interpreted as summary statistics of the population of interest. |                                                                                       |       |            |
| # r7dvby8aneija2: Distance from closed down asylum seekers' centre to where you live                                                                        |                                                                                       |       |            |
| Information                                                                                                                                                 | [Type= discrete] [Format=numeric] [Range= 1-7] [Missing=*]                            |       |            |
| Statistics [NW/ W]                                                                                                                                          | [Valid=4689 /-] [Invalid=0 /-]                                                        |       |            |
| Literal question                                                                                                                                            | Approximately what distance was it from the Asylum seekers' centre to where you live? |       |            |
| Interviewer's instructions                                                                                                                                  | [Asked if u=3 and R7DVBY8aNEI=1. ]                                                    |       |            |
| Value                                                                                                                                                       | Label                                                                                 | Cases | Percentage |
| 1                                                                                                                                                           | The Asylum seekers' centre was next door                                              | 10    | 0.2%       |
| 2                                                                                                                                                           | 1 km                                                                                  | 26    | 0.6%       |

| # r7dvby8aneija2: Distance from closed down asylum seekers' centre to where you live                                                                        |                                                                                                                                              |       |            |
|-------------------------------------------------------------------------------------------------------------------------------------------------------------|----------------------------------------------------------------------------------------------------------------------------------------------|-------|------------|
| Value                                                                                                                                                       | Label                                                                                                                                        | Cases | Percentage |
| 3                                                                                                                                                           | 2 km                                                                                                                                         | 22    | 0.5%       |
| 4                                                                                                                                                           | 3 km                                                                                                                                         | 20    | 0.4%       |
| 5                                                                                                                                                           | 4 km                                                                                                                                         | 14    | 0.3%       |
| 6                                                                                                                                                           | 5 km                                                                                                                                         | 13    | 0.3%       |
| 7                                                                                                                                                           | More than 5 km                                                                                                                               | 27    | 0.6%       |
| 97                                                                                                                                                          | No answer                                                                                                                                    | 1     | 0.0%       |
| 98                                                                                                                                                          | Not asked                                                                                                                                    | 4556  | 97.2%      |
| Warning: these figures indicate the number of cases found in the data file. They cannot be interpreted as summary statistics of the population of interest. |                                                                                                                                              |       |            |
| # r7dvby8aja1: Opinion about having asylum seekers' centre in local area                                                                                    |                                                                                                                                              |       |            |
| Information                                                                                                                                                 | [Type= discrete] [Format=numeric] [Range= 1-3] [Missing=*]                                                                                   |       |            |
| Statistics [NW/ W]                                                                                                                                          | [Valid=4689 /-] [Invalid=0 /-]                                                                                                               |       |            |
| Literal question                                                                                                                                            | What is your opinion about having an asylum seekers' centre in your local area?                                                              |       |            |
| Interviewer's instructions                                                                                                                                  | [Asked if u=3 OR u=4, and if R7DVBY8=1. ]                                                                                                    |       |            |
| Value                                                                                                                                                       | Label                                                                                                                                        | Cases | Percentage |
| 1                                                                                                                                                           | It is OK                                                                                                                                     | 395   | 8.4%       |
| 2                                                                                                                                                           | It is not OK                                                                                                                                 | 140   | 3.0%       |
| 3                                                                                                                                                           | It doesn't matter                                                                                                                            | 159   | 3.4%       |
| 97                                                                                                                                                          | No answer                                                                                                                                    | 4     | 0.1%       |
| 98                                                                                                                                                          | Not asked                                                                                                                                    | 3991  | 85.1%      |
| Warning: these figures indicate the number of cases found in the data file. They cannot be interpreted as summary statistics of the population of interest. |                                                                                                                                              |       |            |
| # r7dvby8aneil: Opinion about getting asylum seekers' centre in local area                                                                                  |                                                                                                                                              |       |            |
| Information                                                                                                                                                 | [Type= discrete] [Format=numeric] [Range= 1-3] [Missing=*]                                                                                   |       |            |
| Statistics [NW/ W]                                                                                                                                          | [Valid=4689 /-] [Invalid=0 /-]                                                                                                               |       |            |
| Literal question                                                                                                                                            | What is your opinion about getting an asylum seekers' centre in your local area?                                                             |       |            |
| Interviewer's instructions                                                                                                                                  | [Asked if u=3 OR u=4, and if R7DVBY8>1. ]                                                                                                    |       |            |
| Value                                                                                                                                                       | Label                                                                                                                                        | Cases | Percentage |
| 1                                                                                                                                                           | It is OK                                                                                                                                     | 563   | 12.0%      |
| 2                                                                                                                                                           | It is not OK                                                                                                                                 | 484   | 10.3%      |
| 3                                                                                                                                                           | It doesn't matter                                                                                                                            | 494   | 10.5%      |
| 97                                                                                                                                                          | No answer                                                                                                                                    | 67    | 1.4%       |
| 98                                                                                                                                                          | Not asked                                                                                                                                    | 3081  | 65.7%      |
| Warning: these figures indicate the number of cases found in the data file. They cannot be interpreted as summary statistics of the population of interest. |                                                                                                                                              |       |            |
| # r7dvby9_1: Experience of receiving many asylum seekers recently: Said hello                                                                               |                                                                                                                                              |       |            |
| Information                                                                                                                                                 | [Type= discrete] [Format=numeric] [Range= 1-3] [Missing=*]                                                                                   |       |            |
| Statistics [NW/ W]                                                                                                                                          | [Valid=4689 /-] [Invalid=0 /-]                                                                                                               |       |            |
| Pre-question                                                                                                                                                | Norway has received many asylum seekers recently. People have had different experiences of this. What have your experiences been?<br>I have: |       |            |
| Literal question                                                                                                                                            | Said hello to some of the asylum seekers.                                                                                                    |       |            |
| Interviewer's instructions                                                                                                                                  | [Asked if u=3. ]                                                                                                                             |       |            |
| Notes                                                                                                                                                       | Hilst på noen av asylsøkerne. (Norge har fått mange asylsøkere den siste tiden. Folk har gjort seg ulike erfaringer m                        |       |            |



### # r7dvby9\_1: Experience of receiving many asylum seekers recently: Said hello

| Value | Label        | Cases | Percentage |
|-------|--------------|-------|------------|
| 1     | Yes          | 400   | 8.5%       |
| 2     | No           | 472   | 10.1%      |
| 3     | Not relevant | 171   | 3.6%       |
| 97    | No answer    | 60    | 1.3%       |
| 98    | Not asked    | 3586  | 76.5%      |

Warning: these figures indicate the number of cases found in the data file. They cannot be interpreted as summary statistics of the population of interest.

### # r7dvby9\_2: Experience of receiving many asylum seekers recently: Contact via the internet

|                                   |                                                                                                                                              |
|-----------------------------------|----------------------------------------------------------------------------------------------------------------------------------------------|
| <b>Information</b>                | [Type= discrete] [Format=numeric] [Range= 1-3] [Missing=*]                                                                                   |
| <b>Statistics [NW/ W]</b>         | [Valid=4689 /-] [Invalid=0 /-]                                                                                                               |
| <b>Pre-question</b>               | Norway has received many asylum seekers recently. People have had different experiences of this. What have your experiences been?<br>I have: |
| <b>Literal question</b>           | Had contact via the internet with asylum seekers (for example Facebook or Finn).                                                             |
| <b>Interviewer's instructions</b> | [Asked if u=3. ]                                                                                                                             |
| <b>Notes</b>                      | Hatt kontakt på internett med asylsøkere (f.eks. på Facebook eller Finn). (Norge har fått mange asylsøkere den siste                         |

| Value | Label        | Cases | Percentage |
|-------|--------------|-------|------------|
| 1     | Yes          | 52    | 1.1%       |
| 2     | No           | 792   | 16.9%      |
| 3     | Not relevant | 178   | 3.8%       |
| 97    | No answer    | 81    | 1.7%       |
| 98    | Not asked    | 3586  | 76.5%      |

Warning: these figures indicate the number of cases found in the data file. They cannot be interpreted as summary statistics of the population of interest.

### # r7dvby9\_3: Experience of receiving many asylum seekers recently: Become friends with some

|                                   |                                                                                                                                              |
|-----------------------------------|----------------------------------------------------------------------------------------------------------------------------------------------|
| <b>Information</b>                | [Type= discrete] [Format=numeric] [Range= 1-3] [Missing=*]                                                                                   |
| <b>Statistics [NW/ W]</b>         | [Valid=4689 /-] [Invalid=0 /-]                                                                                                               |
| <b>Pre-question</b>               | Norway has received many asylum seekers recently. People have had different experiences of this. What have your experiences been?<br>I have: |
| <b>Literal question</b>           | Become friends with some of the asylum seekers.                                                                                              |
| <b>Interviewer's instructions</b> | [Asked if u=3. ]                                                                                                                             |
| <b>Notes</b>                      | Blitt venn med noen av asylsøkerne. (Norge har fått mange asylsøkere den siste tiden. Folk har gjort seg ulike erfarin                       |

| Value | Label        | Cases | Percentage |
|-------|--------------|-------|------------|
| 1     | Yes          | 80    | 1.7%       |
| 2     | No           | 789   | 16.8%      |
| 3     | Not relevant | 158   | 3.4%       |
| 97    | No answer    | 76    | 1.6%       |
| 98    | Not asked    | 3586  | 76.5%      |

Warning: these figures indicate the number of cases found in the data file. They cannot be interpreted as summary statistics of the population of interest.

### # r7dvby9\_4: Experience of receiving many asylum seekers recently: Recieved assistance

|                           |                                                                                                                                              |
|---------------------------|----------------------------------------------------------------------------------------------------------------------------------------------|
| <b>Information</b>        | [Type= discrete] [Format=numeric] [Range= 1-3] [Missing=*]                                                                                   |
| <b>Statistics [NW/ W]</b> | [Valid=4689 /-] [Invalid=0 /-]                                                                                                               |
| <b>Pre-question</b>       | Norway has received many asylum seekers recently. People have had different experiences of this. What have your experiences been?<br>I have: |

| # r7dvby9_4: Experience of receiving many asylum seekers recently: Recieved assistance                                                                      |                                                                                                                                              |       |                              |
|-------------------------------------------------------------------------------------------------------------------------------------------------------------|----------------------------------------------------------------------------------------------------------------------------------------------|-------|------------------------------|
| Literal question                                                                                                                                            | Received assistance from one or more asylum seekers.                                                                                         |       |                              |
| Interviewer's instructions                                                                                                                                  | [Asked if u=3. ]                                                                                                                             |       |                              |
| Notes                                                                                                                                                       | Fått hjelp av en eller flere asylsøkere. (Norge har fått mange asylsøkere den siste tiden. Folk har gjort seg ulike e                        |       |                              |
| Value                                                                                                                                                       | Label                                                                                                                                        | Cases | Percentage                   |
| 1                                                                                                                                                           | Yes                                                                                                                                          | 43    | <div><div></div></div> 0.9%  |
| 2                                                                                                                                                           | No                                                                                                                                           | 815   | <div><div></div></div> 17.4% |
| 3                                                                                                                                                           | Not relevant                                                                                                                                 | 163   | <div><div></div></div> 3.5%  |
| 97                                                                                                                                                          | No answer                                                                                                                                    | 82    | <div><div></div></div> 1.7%  |
| 98                                                                                                                                                          | Not asked                                                                                                                                    | 3586  | <div><div></div></div> 76.5% |
| Warning: these figures indicate the number of cases found in the data file. They cannot be interpreted as summary statistics of the population of interest. |                                                                                                                                              |       |                              |
| # r7dvby9_5: Experience of receiving many asylum seekers recently: Become member of support group                                                           |                                                                                                                                              |       |                              |
| Information                                                                                                                                                 | [Type= discrete] [Format=numeric] [Range= 1-3] [Missing=*]                                                                                   |       |                              |
| Statistics [NW/ W]                                                                                                                                          | [Valid=4689 /-] [Invalid=0 /-]                                                                                                               |       |                              |
| Pre-question                                                                                                                                                | Norway has received many asylum seekers recently. People have had different experiences of this. What have your experiences been?<br>I have: |       |                              |
| Literal question                                                                                                                                            | Become a member of a support group for asylum seekers (for example on the net).                                                              |       |                              |
| Interviewer's instructions                                                                                                                                  | [Asked if u=3. ]                                                                                                                             |       |                              |
| Notes                                                                                                                                                       | Blitt med i støttegruppe for asylsøkere (f.eks. på nett). (Norge har fått mange asylsøkere den siste tiden. Folk har                         |       |                              |
| Value                                                                                                                                                       | Label                                                                                                                                        | Cases | Percentage                   |
| 1                                                                                                                                                           | Yes                                                                                                                                          | 55    | <div><div></div></div> 1.2%  |
| 2                                                                                                                                                           | No                                                                                                                                           | 833   | <div><div></div></div> 17.8% |
| 3                                                                                                                                                           | Not relevant                                                                                                                                 | 136   | <div><div></div></div> 2.9%  |
| 97                                                                                                                                                          | No answer                                                                                                                                    | 79    | <div><div></div></div> 1.7%  |
| 98                                                                                                                                                          | Not asked                                                                                                                                    | 3586  | <div><div></div></div> 76.5% |
| Warning: these figures indicate the number of cases found in the data file. They cannot be interpreted as summary statistics of the population of interest. |                                                                                                                                              |       |                              |
| # r7dvby9_6: Experience of receiving many asylum seekers recently: Expressed scepticism                                                                     |                                                                                                                                              |       |                              |
| Information                                                                                                                                                 | [Type= discrete] [Format=numeric] [Range= 1-3] [Missing=*]                                                                                   |       |                              |
| Statistics [NW/ W]                                                                                                                                          | [Valid=4689 /-] [Invalid=0 /-]                                                                                                               |       |                              |
| Pre-question                                                                                                                                                | Norway has received many asylum seekers recently. People have had different experiences of this. What have your experiences been?<br>I have: |       |                              |
| Literal question                                                                                                                                            | Expressed scepticism to asylum seekers to others.                                                                                            |       |                              |
| Interviewer's instructions                                                                                                                                  | [Asked if u=3. ]                                                                                                                             |       |                              |
| Notes                                                                                                                                                       | Uttrykt skepsis overfor asylsøkerne til andre. (Norge har fått mange asylsøkere den siste tiden. Folk har gjort seg ul                       |       |                              |
| Value                                                                                                                                                       | Label                                                                                                                                        | Cases | Percentage                   |
| 1                                                                                                                                                           | Yes                                                                                                                                          | 200   | <div><div></div></div> 4.3%  |
| 2                                                                                                                                                           | No                                                                                                                                           | 711   | <div><div></div></div> 15.2% |
| 3                                                                                                                                                           | Not relevant                                                                                                                                 | 114   | <div><div></div></div> 2.4%  |
| 97                                                                                                                                                          | No answer                                                                                                                                    | 78    | <div><div></div></div> 1.7%  |
| 98                                                                                                                                                          | Not asked                                                                                                                                    | 3586  | <div><div></div></div> 76.5% |
| Warning: these figures indicate the number of cases found in the data file. They cannot be interpreted as summary statistics of the population of interest. |                                                                                                                                              |       |                              |
| # r7dvby9_7: Experience of receiving many asylum seekers recently: Avoided as far as possible                                                               |                                                                                                                                              |       |                              |
| Information                                                                                                                                                 | [Type= discrete] [Format=numeric] [Range= 1-3] [Missing=*]                                                                                   |       |                              |

| # r7dvby9_7: Experience of receiving many asylum seekers recently: Avoided as far as possible                                                               |                                                                                                                                                                      |       |                               |
|-------------------------------------------------------------------------------------------------------------------------------------------------------------|----------------------------------------------------------------------------------------------------------------------------------------------------------------------|-------|-------------------------------|
| Statistics [NW/ W]                                                                                                                                          | [Valid=4689 /-] [Invalid=0 /-]                                                                                                                                       |       |                               |
| Pre-question                                                                                                                                                | Norway has received many asylum seekers recently. People have had different experiences of this. What have your experiences been?<br>I have:                         |       |                               |
| Literal question                                                                                                                                            | Avoided the asylum seekers as far as possible.                                                                                                                       |       |                               |
| Interviewer's instructions                                                                                                                                  | [Asked if u=3. ]                                                                                                                                                     |       |                               |
| Notes                                                                                                                                                       | Unngått asylsøkerne så langt det lar seg gjøre. (Norge har fått mange asylsøkere den siste tiden. Folk har gjort se                                                  |       |                               |
| Value                                                                                                                                                       | Label                                                                                                                                                                | Cases | Percentage                    |
| 1                                                                                                                                                           | Yes                                                                                                                                                                  | 70    | <div><div></div></div> 1.5%   |
| 2                                                                                                                                                           | No                                                                                                                                                                   | 770   | <div><div></div></div> 16.4%  |
| 3                                                                                                                                                           | Not relevant                                                                                                                                                         | 184   | <div><div></div></div> 3.9%   |
| 97                                                                                                                                                          | No answer                                                                                                                                                            | 79    | <div><div></div></div> 1.7%   |
| 98                                                                                                                                                          | Not asked                                                                                                                                                            | 3586  | <div><div></div></div> 76.5%  |
| Warning: these figures indicate the number of cases found in the data file. They cannot be interpreted as summary statistics of the population of interest. |                                                                                                                                                                      |       |                               |
| # r7dvby9_comment: Other experiences [anonymized]                                                                                                           |                                                                                                                                                                      |       |                               |
| Information                                                                                                                                                 | [Type= discrete] [Format=character] [Missing=*]                                                                                                                      |       |                               |
| Statistics [NW/ W]                                                                                                                                          | [Valid=4689 /-] [Invalid=0 /-]                                                                                                                                       |       |                               |
| Pre-question                                                                                                                                                | I have other experiences.                                                                                                                                            |       |                               |
| Literal question                                                                                                                                            | Please write:                                                                                                                                                        |       |                               |
| Interviewer's instructions                                                                                                                                  | [Asked if u=3. ]<br><br>[Data withheld for the sake of anonymity]                                                                                                    |       |                               |
| Value                                                                                                                                                       | Label                                                                                                                                                                | Cases | Percentage                    |
|                                                                                                                                                             |                                                                                                                                                                      | 4689  | <div><div></div></div> 100.0% |
| Warning: these figures indicate the number of cases found in the data file. They cannot be interpreted as summary statistics of the population of interest. |                                                                                                                                                                      |       |                               |
| # r7dvby10_1: Feeling about asylum seekers as a group: Admiration                                                                                           |                                                                                                                                                                      |       |                               |
| Information                                                                                                                                                 | [Type= discrete] [Format=numeric] [Range= 1-5] [Missing=*]                                                                                                           |       |                               |
| Statistics [NW/ W]                                                                                                                                          | [Valid=4689 /-] [Invalid=0 /-]                                                                                                                                       |       |                               |
| Pre-question                                                                                                                                                | There are now some questions about what you personally feel about asylum seekers. To what extent do you have the following feelings about asylum seekers as a group? |       |                               |
| Literal question                                                                                                                                            | Admiration                                                                                                                                                           |       |                               |
| Interviewer's instructions                                                                                                                                  | [Asked if u=3. ]                                                                                                                                                     |       |                               |
| Notes                                                                                                                                                       | Beundring (Nå kommer noen spørsmål om hva du personlig føler om asylsøkere. I hvilken grad har du følgende følelse                                                   |       |                               |
| Value                                                                                                                                                       | Label                                                                                                                                                                | Cases | Percentage                    |
| 1                                                                                                                                                           | To a very great extent                                                                                                                                               | 28    | <div><div></div></div> 0.6%   |
| 2                                                                                                                                                           | To a great extent                                                                                                                                                    | 146   | <div><div></div></div> 3.1%   |
| 3                                                                                                                                                           | Somewhat                                                                                                                                                             | 388   | <div><div></div></div> 8.3%   |
| 4                                                                                                                                                           | Slightly                                                                                                                                                             | 295   | <div><div></div></div> 6.3%   |
| 5                                                                                                                                                           | Not at all                                                                                                                                                           | 151   | <div><div></div></div> 3.2%   |
| 97                                                                                                                                                          | No answer                                                                                                                                                            | 95    | <div><div></div></div> 2.0%   |
| 98                                                                                                                                                          | Not asked                                                                                                                                                            | 3586  | <div><div></div></div> 76.5%  |
| Warning: these figures indicate the number of cases found in the data file. They cannot be interpreted as summary statistics of the population of interest. |                                                                                                                                                                      |       |                               |
| # r7dvby10_2: Feeling about asylum seekers as a group: Sympathy                                                                                             |                                                                                                                                                                      |       |                               |
| Information                                                                                                                                                 | [Type= discrete] [Format=numeric] [Range= 1-5] [Missing=*]                                                                                                           |       |                               |

| # r7dvby10_2: Feeling about asylum seekers as a group: Sympathy                                                                                             |                                                                                                                                                                      |       |                              |
|-------------------------------------------------------------------------------------------------------------------------------------------------------------|----------------------------------------------------------------------------------------------------------------------------------------------------------------------|-------|------------------------------|
| Statistics [NW/ W]                                                                                                                                          | [Valid=4689 /-] [Invalid=0 /-]                                                                                                                                       |       |                              |
| Pre-question                                                                                                                                                | There are now some questions about what you personally feel about asylum seekers. To what extent do you have the following feelings about asylum seekers as a group? |       |                              |
| Literal question                                                                                                                                            | Sympathy                                                                                                                                                             |       |                              |
| Interviewer's instructions                                                                                                                                  | [Asked if u=3. ]                                                                                                                                                     |       |                              |
| Notes                                                                                                                                                       | Medfølelse (Nå kommer noen spørsmål om hva du personlig føler om asylsøkere. I hvilken grad har du følgende følel                                                    |       |                              |
| Value                                                                                                                                                       | Label                                                                                                                                                                | Cases | Percentage                   |
| 1                                                                                                                                                           | To a very great extent                                                                                                                                               | 164   | <div><div></div></div> 3.5%  |
| 2                                                                                                                                                           | To a great extent                                                                                                                                                    | 457   | <div><div></div></div> 9.7%  |
| 3                                                                                                                                                           | Somewhat                                                                                                                                                             | 337   | <div><div></div></div> 7.2%  |
| 4                                                                                                                                                           | Slightly                                                                                                                                                             | 62    | <div><div></div></div> 1.3%  |
| 5                                                                                                                                                           | Not at all                                                                                                                                                           | 35    | <div><div></div></div> 0.7%  |
| 97                                                                                                                                                          | No answer                                                                                                                                                            | 48    | <div><div></div></div> 1.0%  |
| 98                                                                                                                                                          | Not asked                                                                                                                                                            | 3586  | <div><div></div></div> 76.5% |
| Warning: these figures indicate the number of cases found in the data file. They cannot be interpreted as summary statistics of the population of interest. |                                                                                                                                                                      |       |                              |
| # r7dvby10_3: Feeling about asylum seekers as a group: Anxiety                                                                                              |                                                                                                                                                                      |       |                              |
| Information                                                                                                                                                 | [Type= discrete] [Format=numeric] [Range= 1-5] [Missing=*]                                                                                                           |       |                              |
| Statistics [NW/ W]                                                                                                                                          | [Valid=4689 /-] [Invalid=0 /-]                                                                                                                                       |       |                              |
| Pre-question                                                                                                                                                | There are now some questions about what you personally feel about asylum seekers. To what extent do you have the following feelings about asylum seekers as a group? |       |                              |
| Literal question                                                                                                                                            | Anxiety                                                                                                                                                              |       |                              |
| Interviewer's instructions                                                                                                                                  | [Asked if u=3. ]                                                                                                                                                     |       |                              |
| Notes                                                                                                                                                       | Angst (Nå kommer noen spørsmål om hva du personlig føler om asylsøkere. I hvilken grad har du følgende følelser om                                                   |       |                              |
| Value                                                                                                                                                       | Label                                                                                                                                                                | Cases | Percentage                   |
| 1                                                                                                                                                           | To a very great extent                                                                                                                                               | 8     | <div><div></div></div> 0.2%  |
| 2                                                                                                                                                           | To a great extent                                                                                                                                                    | 35    | <div><div></div></div> 0.7%  |
| 3                                                                                                                                                           | Somewhat                                                                                                                                                             | 146   | <div><div></div></div> 3.1%  |
| 4                                                                                                                                                           | Slightly                                                                                                                                                             | 448   | <div><div></div></div> 9.6%  |
| 5                                                                                                                                                           | Not at all                                                                                                                                                           | 379   | <div><div></div></div> 8.1%  |
| 97                                                                                                                                                          | No answer                                                                                                                                                            | 87    | <div><div></div></div> 1.9%  |
| 98                                                                                                                                                          | Not asked                                                                                                                                                            | 3586  | <div><div></div></div> 76.5% |
| Warning: these figures indicate the number of cases found in the data file. They cannot be interpreted as summary statistics of the population of interest. |                                                                                                                                                                      |       |                              |
| # r7dvby10_4: Feeling about asylum seekers as a group: Fear                                                                                                 |                                                                                                                                                                      |       |                              |
| Information                                                                                                                                                 | [Type= discrete] [Format=numeric] [Range= 1-5] [Missing=*]                                                                                                           |       |                              |
| Statistics [NW/ W]                                                                                                                                          | [Valid=4689 /-] [Invalid=0 /-]                                                                                                                                       |       |                              |
| Pre-question                                                                                                                                                | There are now some questions about what you personally feel about asylum seekers. To what extent do you have the following feelings about asylum seekers as a group? |       |                              |
| Literal question                                                                                                                                            | Fear                                                                                                                                                                 |       |                              |
| Interviewer's instructions                                                                                                                                  | [Asked if u=3. ]                                                                                                                                                     |       |                              |
| Notes                                                                                                                                                       | Frykt (Nå kommer noen spørsmål om hva du personlig føler om asylsøkere. I hvilken grad har du følgende følelser om                                                   |       |                              |
| Value                                                                                                                                                       | Label                                                                                                                                                                | Cases | Percentage                   |
| 1                                                                                                                                                           | To a very great extent                                                                                                                                               | 20    | <div><div></div></div> 0.4%  |
| 2                                                                                                                                                           | To a great extent                                                                                                                                                    | 32    | <div><div></div></div> 0.7%  |
| 3                                                                                                                                                           | Somewhat                                                                                                                                                             | 157   | <div><div></div></div> 3.3%  |

| # r7dvby10_4: Feeling about asylum seekers as a group: Fear                                                                                                 |                                                                                                                 |       |             |       |
|-------------------------------------------------------------------------------------------------------------------------------------------------------------|-----------------------------------------------------------------------------------------------------------------|-------|-------------|-------|
| Value                                                                                                                                                       | Label                                                                                                           | Cases | Percentage  |       |
| 4                                                                                                                                                           | Slightly                                                                                                        | 433   | <div></div> | 9.2%  |
| 5                                                                                                                                                           | Not at all                                                                                                      | 379   | <div></div> | 8.1%  |
| 97                                                                                                                                                          | No answer                                                                                                       | 82    | <div></div> | 1.7%  |
| 98                                                                                                                                                          | Not asked                                                                                                       | 3586  | <div></div> | 76.5% |
| Warning: these figures indicate the number of cases found in the data file. They cannot be interpreted as summary statistics of the population of interest. |                                                                                                                 |       |             |       |
| # r7dvby11_1: To what extent have you imagined what it is like arrive in Norway as an asylum seeker?                                                        |                                                                                                                 |       |             |       |
| Information                                                                                                                                                 | [Type= discrete] [Format=numeric] [Range= 1-5] [Missing=*]                                                      |       |             |       |
| Statistics [NW/ W]                                                                                                                                          | [Valid=4689 /-] [Invalid=0 /-]                                                                                  |       |             |       |
| Literal question                                                                                                                                            | To what extent have you thought about or imagined what it is like to arrive in Norway as an asylum seeker?      |       |             |       |
| Interviewer's instructions                                                                                                                                  | [Asked if u=3 OR u=4. ]                                                                                         |       |             |       |
| Notes                                                                                                                                                       | R7DVBY11_1 (I hvilken grad har du tenkt på og forestilt deg hvordan det føles å komme til Norge som asylsøker?) |       |             |       |
| Value                                                                                                                                                       | Label                                                                                                           | Cases | Percentage  |       |
| 1                                                                                                                                                           | To a very great extent                                                                                          | 188   | <div></div> | 4.0%  |
| 2                                                                                                                                                           | To a great extent                                                                                               | 539   | <div></div> | 11.5% |
| 3                                                                                                                                                           | Somewhat                                                                                                        | 1044  | <div></div> | 22.3% |
| 4                                                                                                                                                           | Slightly                                                                                                        | 345   | <div></div> | 7.4%  |
| 5                                                                                                                                                           | Not at all                                                                                                      | 130   | <div></div> | 2.8%  |
| 97                                                                                                                                                          | No answer                                                                                                       | 60    | <div></div> | 1.3%  |
| 98                                                                                                                                                          | Not asked                                                                                                       | 2383  | <div></div> | 50.8% |
| Warning: these figures indicate the number of cases found in the data file. They cannot be interpreted as summary statistics of the population of interest. |                                                                                                                 |       |             |       |
| # r7padpilot1: For/against: EU-membership                                                                                                                   |                                                                                                                 |       |             |       |
| Information                                                                                                                                                 | [Type= discrete] [Format=numeric] [Range= 1-3] [Missing=*]                                                      |       |             |       |
| Statistics [NW/ W]                                                                                                                                          | [Valid=4689 /-] [Invalid=0 /-]                                                                                  |       |             |       |
| Pre-question                                                                                                                                                | There are now a couple of questions regarding EU membership for Norway.                                         |       |             |       |
| Literal question                                                                                                                                            | Firstly: Are you for or against?                                                                                |       |             |       |
| Interviewer's instructions                                                                                                                                  | [Asked if u=3. ]                                                                                                |       |             |       |
| Value                                                                                                                                                       | Label                                                                                                           | Cases | Percentage  |       |
| 1                                                                                                                                                           | I am in favour of EU membership for Norway                                                                      | 249   | <div></div> | 5.3%  |
| 2                                                                                                                                                           | I am against EU membership for Norway                                                                           | 651   | <div></div> | 13.9% |
| 3                                                                                                                                                           | Don't know                                                                                                      | 175   | <div></div> | 3.7%  |
| 97                                                                                                                                                          | No answer                                                                                                       | 28    | <div></div> | 0.6%  |
| 98                                                                                                                                                          | Not asked                                                                                                       | 3586  | <div></div> | 76.5% |
| Warning: these figures indicate the number of cases found in the data file. They cannot be interpreted as summary statistics of the population of interest. |                                                                                                                 |       |             |       |

| # r7padpilot2_ran: R7PADPILOT2_ran |                                                                                  |                                                                                                                          |                  |
|------------------------------------|----------------------------------------------------------------------------------|--------------------------------------------------------------------------------------------------------------------------|------------------|
| <b>Information</b>                 |                                                                                  | [Type= discrete] [Format=numeric] [Range= 1-144] [Missing=*]                                                             |                  |
| <b>Statistics [NW/ W]</b>          |                                                                                  | [Valid=1082 /-] [Invalid=3607 /-]                                                                                        |                  |
| <b>Interviewer's instructions</b>  |                                                                                  | [Asked if u=3. A vignette is randomly selected from a population of 145 vignettes. The vignette is used in R7PADPILOT2.] |                  |
| Value                              | Label                                                                            | Cases                                                                                                                    | Percentage       |
| 1                                  | 1                                                                                | 12                                                                                                                       | <div></div> 1.1% |
| 2                                  | 2                                                                                | 4                                                                                                                        | <div></div> 0.4% |
| 3                                  | 3                                                                                | 7                                                                                                                        | <div></div> 0.6% |
| 4                                  | 4                                                                                | 4                                                                                                                        | <div></div> 0.4% |
| 5                                  | La oss si at 35% av befolkningen deltok.                                         | 5                                                                                                                        | <div></div> 0.5% |
| 6                                  | La oss si at 47% av befolkningen deltok.                                         | 8                                                                                                                        | <div></div> 0.7% |
| 7                                  | La oss si at 53% av befolkningen deltok.                                         | 7                                                                                                                        | <div></div> 0.6% |
| 8                                  | La oss si at 85% av befolkningen deltok.                                         | 8                                                                                                                        | <div></div> 0.7% |
| 9                                  | 9                                                                                | 3                                                                                                                        | <div></div> 0.3% |
| 10                                 | 10                                                                               | 9                                                                                                                        | <div></div> 0.8% |
| 11                                 | 11                                                                               | 12                                                                                                                       | <div></div> 1.1% |
| 12                                 | 12                                                                               | 10                                                                                                                       | <div></div> 0.9% |
| 13                                 | La oss si at 35% av befolkningen deltok.                                         | 4                                                                                                                        | <div></div> 0.4% |
| 14                                 | La oss si at 47% av befolkningen deltok.                                         | 6                                                                                                                        | <div></div> 0.6% |
| 15                                 | La oss si at 53% av befolkningen deltok.                                         | 11                                                                                                                       | <div></div> 1.0% |
| 16                                 | La oss si at 85% av befolkningen deltok.                                         | 12                                                                                                                       | <div></div> 1.1% |
| 17                                 | 17                                                                               | 6                                                                                                                        | <div></div> 0.6% |
| 18                                 | 18                                                                               | 7                                                                                                                        | <div></div> 0.6% |
| 19                                 | 19                                                                               | 9                                                                                                                        | <div></div> 0.8% |
| 20                                 | 20                                                                               | 4                                                                                                                        | <div></div> 0.4% |
| 21                                 | La oss si at 35% av befolkningen deltok.                                         | 9                                                                                                                        | <div></div> 0.8% |
| 22                                 | La oss si at 47% av befolkningen deltok.                                         | 13                                                                                                                       | <div></div> 1.2% |
| 23                                 | La oss si at 53% av befolkningen deltok.                                         | 5                                                                                                                        | <div></div> 0.5% |
| 24                                 | La oss si at 85% av befolkningen deltok.                                         | 10                                                                                                                       | <div></div> 0.9% |
| 25                                 | La oss si at den vinnende siden fikk 51% av stemmene.                            | 5                                                                                                                        | <div></div> 0.5% |
| 26                                 | La oss si at den vinnende siden fikk 51% av stemmene.                            | 8                                                                                                                        | <div></div> 0.7% |
| 27                                 | La oss si at den vinnende siden fikk 51% av stemmene.                            | 6                                                                                                                        | <div></div> 0.6% |
| 28                                 | La oss si at den vinnende siden fikk 51% av stemmene.                            | 5                                                                                                                        | <div></div> 0.5% |
| 29                                 | La oss si at 35% av befolkningen deltok og at den vinnende siden fikk 51% av ste | 10                                                                                                                       | <div></div> 0.9% |
| 30                                 | La oss si at 47% av befolkningen deltok og at den vinnende siden fikk 51% av ste | 4                                                                                                                        | <div></div> 0.4% |
| 31                                 | La oss si at 53% av befolkningen deltok og at den vinnende siden fikk 51% av ste | 8                                                                                                                        | <div></div> 0.7% |
| 32                                 | La oss si at 85% av befolkningen deltok og at den vinnende siden fikk 51% av ste | 11                                                                                                                       | <div></div> 1.0% |
| 33                                 | La oss si at den vinnende siden fikk 55% av stemmene.                            | 6                                                                                                                        | <div></div> 0.6% |
| 34                                 | La oss si at den vinnende siden fikk 55% av stemmene.                            | 9                                                                                                                        | <div></div> 0.8% |
| 35                                 | La oss si at den vinnende siden fikk 55% av stemmene.                            | 5                                                                                                                        | <div></div> 0.5% |
| 36                                 | La oss si at den vinnende siden fikk 55% av stemmene.                            | 6                                                                                                                        | <div></div> 0.6% |
| 37                                 | La oss si at 35% av befolkningen deltok og at den vinnende siden fikk 55% av ste | 8                                                                                                                        | <div></div> 0.7% |

# # r7padpilot2\_ran: R7PADPILOT2\_ran

| Value | Label                                                                            | Cases | Percentage |
|-------|----------------------------------------------------------------------------------|-------|------------|
| 38    | La oss si at 47% av befolkningen deltok og at den vinnende siden fikk 55% av ste | 5     | 0.5%       |
| 39    | La oss si at 53% av befolkningen deltok og at den vinnende siden fikk 55% av ste | 6     | 0.6%       |
| 40    | La oss si at 85% av befolkningen deltok og at den vinnende siden fikk 55% av ste | 5     | 0.5%       |
| 41    | La oss si at den vinnende siden fikk 70% av stemmene.                            | 12    | 1.1%       |
| 42    | La oss si at den vinnende siden fikk 70% av stemmene.                            | 9     | 0.8%       |
| 43    | La oss si at den vinnende siden fikk 70% av stemmene.                            | 7     | 0.6%       |
| 44    | La oss si at den vinnende siden fikk 70% av stemmene.                            | 7     | 0.6%       |
| 45    | La oss si at 35% av befolkningen deltok og at den vinnende siden fikk 70% av ste | 12    | 1.1%       |
| 46    | La oss si at 47% av befolkningen deltok og at den vinnende siden fikk 70% av ste | 8     | 0.7%       |
| 47    | La oss si at 53% av befolkningen deltok og at den vinnende siden fikk 70% av ste | 9     | 0.8%       |
| 48    | La oss si at 85% av befolkningen deltok og at den vinnende siden fikk 70% av ste | 9     | 0.8%       |
| 49    | La oss si at ja-siden fikk flertall.                                             | 6     | 0.6%       |
| 50    | La oss si at ja-siden fikk flertall.                                             | 6     | 0.6%       |
| 51    | La oss si at ja-siden fikk flertall.                                             | 11    | 1.0%       |
| 52    | La oss si at ja-siden fikk flertall.                                             | 5     | 0.5%       |
| 53    | La oss si at 35% av befolkningen deltok og at ja-siden fikk flertall.            | 5     | 0.5%       |
| 54    | La oss si at 47% av befolkningen deltok og at ja-siden fikk flertall.            | 4     | 0.4%       |
| 55    | La oss si at 53% av befolkningen deltok og at ja-siden fikk flertall.            | 8     | 0.7%       |
| 56    | La oss si at 85% av befolkningen deltok og at ja-siden fikk flertall.            | 9     | 0.8%       |
| 57    | La oss si at ja-siden fikk flertall.                                             | 6     | 0.6%       |
| 58    | La oss si at ja-siden fikk flertall.                                             | 8     | 0.7%       |
| 59    | La oss si at ja-siden fikk flertall.                                             | 5     | 0.5%       |
| 60    | La oss si at ja-siden fikk flertall.                                             | 1     | 0.1%       |
| 61    | La oss si at 35% av befolkningen deltok og at ja-siden fikk flertall.            | 7     | 0.6%       |
| 62    | La oss si at 47% av befolkningen deltok og at ja-siden fikk flertall.            | 5     | 0.5%       |
| 63    | La oss si at 53% av befolkningen deltok og at ja-siden fikk flertall.            | 6     | 0.6%       |
| 64    | La oss si at 85% av befolkningen deltok og at ja-siden fikk flertall.            | 7     | 0.6%       |
| 65    | La oss si at ja-siden fikk flertall.                                             | 8     | 0.7%       |
| 66    | La oss si at ja-siden fikk flertall.                                             | 15    | 1.4%       |
| 67    | La oss si at ja-siden fikk flertall.                                             | 2     | 0.2%       |
| 68    | La oss si at ja-siden fikk flertall.                                             | 10    | 0.9%       |
| 69    | La oss si at 35% av befolkningen deltok og at ja-siden fikk flertall.            | 3     | 0.3%       |
| 70    | La oss si at 47% av befolkningen deltok og at ja-siden fikk flertall.            | 7     | 0.6%       |
| 71    | La oss si at 53% av befolkningen deltok og at ja-siden fikk flertall.            | 5     | 0.5%       |
| 72    | La oss si at 85% av befolkningen deltok og at ja-siden fikk flertall.            | 7     | 0.6%       |
| 73    | La oss si at ja-siden fikk 51% av stemmene.                                      | 14    | 1.3%       |
| 74    | La oss si at ja-siden fikk 51% av stemmene.                                      | 8     | 0.7%       |
| 75    | La oss si at ja-siden fikk 51% av stemmene.                                      | 8     | 0.7%       |
| 76    | La oss si at ja-siden fikk 51% av stemmene.                                      | 3     | 0.3%       |
| 77    | La oss si at 35% av befolkningen deltok og at ja-siden fikk 51% av stemmene.     | 7     | 0.6%       |

## # r7padpilot2\_ran: R7PADPILOT2\_ran

| Value | Label                                                                        | Cases | Percentage |
|-------|------------------------------------------------------------------------------|-------|------------|
| 78    | La oss si at 47% av befolkningen deltok og at ja-siden fikk 51% av stemmene. | 6     | 0.6%       |
| 79    | La oss si at 53% av befolkningen deltok og at ja-siden fikk 51% av stemmene. | 5     | 0.5%       |
| 80    | La oss si at 85% av befolkningen deltok og at ja-siden fikk 51% av stemmene. | 8     | 0.7%       |
| 81    | La oss si at ja-siden fikk 55% av stemmene.                                  | 9     | 0.8%       |
| 82    | La oss si at ja-siden fikk 55% av stemmene.                                  | 7     | 0.6%       |
| 83    | La oss si at ja-siden fikk 55% av stemmene.                                  | 6     | 0.6%       |
| 84    | La oss si at ja-siden fikk 55% av stemmene.                                  | 10    | 0.9%       |
| 85    | La oss si at 35% av befolkningen deltok og at ja-siden fikk 55% av stemmene. | 7     | 0.6%       |
| 86    | La oss si at 47% av befolkningen deltok og at ja-siden fikk 55% av stemmene. | 13    | 1.2%       |
| 87    | La oss si at 53% av befolkningen deltok og at ja-siden fikk 55% av stemmene. | 11    | 1.0%       |
| 88    | La oss si at 85% av befolkningen deltok og at ja-siden fikk 55% av stemmene. | 5     | 0.5%       |
| 89    | La oss si at ja-siden fikk 70% av stemmene.                                  | 7     | 0.6%       |
| 90    | La oss si at ja-siden fikk 70% av stemmene.                                  | 8     | 0.7%       |
| 91    | La oss si at ja-siden fikk 70% av stemmene.                                  | 9     | 0.8%       |
| 92    | La oss si at ja-siden fikk 70% av stemmene.                                  | 9     | 0.8%       |
| 93    | La oss si at 35% av befolkningen deltok og at ja-siden fikk 70% av stemmene. | 9     | 0.8%       |
| 94    | La oss si at 47% av befolkningen deltok og at ja-siden fikk 70% av stemmene. | 9     | 0.8%       |
| 95    | La oss si at 53% av befolkningen deltok og at ja-siden fikk 70% av stemmene. | 8     | 0.7%       |
| 96    | La oss si at 85% av befolkningen deltok og at ja-siden fikk 70% av stemmene. | 7     | 0.6%       |
| 97    | La oss si at nei-siden fikk flertall.                                        | 6     | 0.6%       |
| 98    | La oss si at nei-siden fikk flertall.                                        | 4     | 0.4%       |
| 99    | La oss si at nei-siden fikk flertall.                                        | 5     | 0.5%       |
| 100   | La oss si at nei-siden fikk flertall.                                        | 12    | 1.1%       |
| 101   | La oss si at 35% av befolkningen deltok og at nei-siden fikk flertall.       | 8     | 0.7%       |
| 102   | La oss si at 47% av befolkningen deltok og at nei-siden fikk flertall.       | 4     | 0.4%       |
| 103   | La oss si at 53% av befolkningen deltok og at nei-siden fikk flertall.       | 7     | 0.6%       |
| 104   | La oss si at 85% av befolkningen deltok og at nei-siden fikk flertall.       | 9     | 0.8%       |
| 105   | La oss si at nei-siden fikk flertall.                                        | 11    | 1.0%       |
| 106   | La oss si at nei-siden fikk flertall.                                        | 2     | 0.2%       |
| 107   | La oss si at nei-siden fikk flertall.                                        | 7     | 0.6%       |
| 108   | La oss si at nei-siden fikk flertall.                                        | 5     | 0.5%       |
| 109   | La oss si at 35% av befolkningen deltok og at nei-siden fikk flertall.       | 5     | 0.5%       |
| 110   | La oss si at 47% av befolkningen deltok og at nei-siden fikk flertall.       | 5     | 0.5%       |
| 111   | La oss si at 53% av befolkningen deltok og at nei-siden fikk flertall.       | 12    | 1.1%       |
| 112   | La oss si at 85% av befolkningen deltok og at nei-siden fikk flertall.       | 8     | 0.7%       |
| 113   | La oss si at nei-siden fikk flertall.                                        | 5     | 0.5%       |
| 114   | La oss si at nei-siden fikk flertall.                                        | 7     | 0.6%       |
| 115   | La oss si at nei-siden fikk flertall.                                        | 14    | 1.3%       |



| # r7padpilot2_ran: R7PADPILOT2_ran                                                                                                                          |                                                                                                                                                                                                                                           |       |                             |
|-------------------------------------------------------------------------------------------------------------------------------------------------------------|-------------------------------------------------------------------------------------------------------------------------------------------------------------------------------------------------------------------------------------------|-------|-----------------------------|
| Value                                                                                                                                                       | Label                                                                                                                                                                                                                                     | Cases | Percentage                  |
| 116                                                                                                                                                         | La oss si at nei-siden fikk flertall.                                                                                                                                                                                                     | 8     | <div><div></div></div> 0.7% |
| 117                                                                                                                                                         | La oss si at 35% av befolkningen deltok og at nei-siden fikk flertall.                                                                                                                                                                    | 4     | <div><div></div></div> 0.4% |
| 118                                                                                                                                                         | La oss si at 47% av befolkningen deltok og at nei-siden fikk flertall.                                                                                                                                                                    | 5     | <div><div></div></div> 0.5% |
| 119                                                                                                                                                         | La oss si at 53% av befolkningen deltok og at nei-siden fikk flertall.                                                                                                                                                                    | 11    | <div><div></div></div> 1.0% |
| 120                                                                                                                                                         | La oss si at 85% av befolkningen deltok og at nei-siden fikk flertall.                                                                                                                                                                    | 6     | <div><div></div></div> 0.6% |
| 121                                                                                                                                                         | La oss si at nei-siden fikk 51% av stemmene.                                                                                                                                                                                              | 11    | <div><div></div></div> 1.0% |
| 122                                                                                                                                                         | La oss si at nei-siden fikk 51% av stemmene.                                                                                                                                                                                              | 9     | <div><div></div></div> 0.8% |
| 123                                                                                                                                                         | La oss si at nei-siden fikk 51% av stemmene.                                                                                                                                                                                              | 10    | <div><div></div></div> 0.9% |
| 124                                                                                                                                                         | La oss si at nei-siden fikk 51% av stemmene.                                                                                                                                                                                              | 8     | <div><div></div></div> 0.7% |
| 125                                                                                                                                                         | La oss si at 35% av befolkningen deltok og at nei-siden fikk 51% av stemmene.                                                                                                                                                             | 8     | <div><div></div></div> 0.7% |
| 126                                                                                                                                                         | La oss si at 47% av befolkningen deltok og at nei-siden fikk 51% av stemmene.                                                                                                                                                             | 9     | <div><div></div></div> 0.8% |
| 127                                                                                                                                                         | La oss si at 53% av befolkningen deltok og at nei-siden fikk 51% av stemmene.                                                                                                                                                             | 7     | <div><div></div></div> 0.6% |
| 128                                                                                                                                                         | La oss si at 85% av befolkningen deltok og at nei-siden fikk 51% av stemmene.                                                                                                                                                             | 6     | <div><div></div></div> 0.6% |
| 129                                                                                                                                                         | La oss si at nei-siden fikk 55% av stemmene.                                                                                                                                                                                              | 8     | <div><div></div></div> 0.7% |
| 130                                                                                                                                                         | La oss si at nei-siden fikk 55% av stemmene.                                                                                                                                                                                              | 8     | <div><div></div></div> 0.7% |
| 131                                                                                                                                                         | La oss si at nei-siden fikk 55% av stemmene.                                                                                                                                                                                              | 7     | <div><div></div></div> 0.6% |
| 132                                                                                                                                                         | La oss si at nei-siden fikk 55% av stemmene.                                                                                                                                                                                              | 7     | <div><div></div></div> 0.6% |
| 133                                                                                                                                                         | La oss si at 35% av befolkningen deltok og at nei-siden fikk 55% av stemmene.                                                                                                                                                             | 10    | <div><div></div></div> 0.9% |
| 134                                                                                                                                                         | La oss si at 47% av befolkningen deltok og at nei-siden fikk 55% av stemmene.                                                                                                                                                             | 10    | <div><div></div></div> 0.9% |
| 135                                                                                                                                                         | La oss si at 53% av befolkningen deltok og at nei-siden fikk 55% av stemmene.                                                                                                                                                             | 11    | <div><div></div></div> 1.0% |
| 136                                                                                                                                                         | La oss si at 85% av befolkningen deltok og at nei-siden fikk 55% av stemmene.                                                                                                                                                             | 11    | <div><div></div></div> 1.0% |
| 137                                                                                                                                                         | La oss si at nei-siden fikk 70% av stemmene.                                                                                                                                                                                              | 7     | <div><div></div></div> 0.6% |
| 138                                                                                                                                                         | La oss si at nei-siden fikk 70% av stemmene.                                                                                                                                                                                              | 7     | <div><div></div></div> 0.6% |
| 139                                                                                                                                                         | La oss si at nei-siden fikk 70% av stemmene.                                                                                                                                                                                              | 9     | <div><div></div></div> 0.8% |
| 140                                                                                                                                                         | La oss si at nei-siden fikk 70% av stemmene.                                                                                                                                                                                              | 9     | <div><div></div></div> 0.8% |
| 141                                                                                                                                                         | La oss si at 35% av befolkningen deltok og at nei-siden fikk 70% av stemmene.                                                                                                                                                             | 6     | <div><div></div></div> 0.6% |
| 142                                                                                                                                                         | La oss si at 47% av befolkningen deltok og at nei-siden fikk 70% av stemmene.                                                                                                                                                             | 10    | <div><div></div></div> 0.9% |
| 143                                                                                                                                                         | La oss si at 53% av befolkningen deltok og at nei-siden fikk 70% av stemmene.                                                                                                                                                             | 5     | <div><div></div></div> 0.5% |
| 144                                                                                                                                                         | La oss si at 85% av befolkningen deltok og at nei-siden fikk 70% av stemmene.                                                                                                                                                             | 5     | <div><div></div></div> 0.5% |
| Sysmiss                                                                                                                                                     |                                                                                                                                                                                                                                           | 3607  |                             |
| Warning: these figures indicate the number of cases found in the data file. They cannot be interpreted as summary statistics of the population of interest. |                                                                                                                                                                                                                                           |       |                             |
| # r7padpilot2: Should the government act according to result of advisory referendum even if majority in Storting disagree?                                  |                                                                                                                                                                                                                                           |       |                             |
| Information                                                                                                                                                 | [Type= discrete] [Format=numeric] [Range= 1-2] [Missing=*]                                                                                                                                                                                |       |                             |
| Statistics [NW/ W]                                                                                                                                          | [Valid=4689 /-] [Invalid=0 /-]                                                                                                                                                                                                            |       |                             |
| Pre-question                                                                                                                                                | We are interested in examining what mandate the government needs to make important choices on behalf of the people. Imagine a new debate regarding EU membership for Norway and that an advisory referendum was held regarding the issue. |       |                             |

|                                                                                                                                                             |                                                                                                                                                       |       |                              |
|-------------------------------------------------------------------------------------------------------------------------------------------------------------|-------------------------------------------------------------------------------------------------------------------------------------------------------|-------|------------------------------|
| # r7padpilot2: Should the government act according to result of advisory referendum even if majority in Storting disagree?                                  |                                                                                                                                                       |       |                              |
|                                                                                                                                                             | ^f('R7PADPILOT2_ran')^                                                                                                                                |       |                              |
| Literal question                                                                                                                                            | In such a case the government must act according to the result of the referendum even if the majority in the Storting disagree?                       |       |                              |
| Interviewer's instructions                                                                                                                                  | [Asked if u=3. Experiment using vignettes. The question wording varies in accordance with the vignette that is randomly selected in R7PADPILOT2_ran.] |       |                              |
| Notes                                                                                                                                                       | Vi er interessert i å undersøke hvilket mandat regjeringen trenger for å ta viktige valg på vegne av folket. Se for d                                 |       |                              |
| Value                                                                                                                                                       | Label                                                                                                                                                 | Cases | Percentage                   |
| 1                                                                                                                                                           | Yes                                                                                                                                                   | 817   | <div><div></div></div> 17.4% |
| 2                                                                                                                                                           | No                                                                                                                                                    | 248   | <div><div></div></div> 5.3%  |
| 97                                                                                                                                                          | No answer                                                                                                                                             | 38    | <div><div></div></div> 0.8%  |
| 98                                                                                                                                                          | Not asked                                                                                                                                             | 3586  | <div><div></div></div> 76.5% |
| Warning: these figures indicate the number of cases found in the data file. They cannot be interpreted as summary statistics of the population of interest. |                                                                                                                                                       |       |                              |
| # r7dv29_1: Statement: Begging should be prohibited                                                                                                         |                                                                                                                                                       |       |                              |
| Information                                                                                                                                                 | [Type= discrete] [Format=numeric] [Range= 1-7] [Missing=*]                                                                                            |       |                              |
| Statistics [NW/ W]                                                                                                                                          | [Valid=4689 /-] [Invalid=0 /-]                                                                                                                        |       |                              |
| Pre-question                                                                                                                                                | Please look at the statements below. To what extent do you agree or disagree with them?                                                               |       |                              |
| Literal question                                                                                                                                            | Begging should be prohibited in Norway.                                                                                                               |       |                              |
| Interviewer's instructions                                                                                                                                  | [Asked if u=4. ]                                                                                                                                      |       |                              |
| Notes                                                                                                                                                       | Tigging bør være forbudt i Norge. (Se på utsagnene nedenfor. Hvor enig eller uenig er du i dem? )                                                     |       |                              |
| Value                                                                                                                                                       | Label                                                                                                                                                 | Cases | Percentage                   |
| 1                                                                                                                                                           | Strongly agree                                                                                                                                        | 288   | <div><div></div></div> 6.1%  |
| 2                                                                                                                                                           | Agree                                                                                                                                                 | 256   | <div><div></div></div> 5.5%  |
| 3                                                                                                                                                           | Somewhat agree                                                                                                                                        | 209   | <div><div></div></div> 4.5%  |
| 4                                                                                                                                                           | Neither agree nor disagree                                                                                                                            | 147   | <div><div></div></div> 3.1%  |
| 5                                                                                                                                                           | Somewhat disagree                                                                                                                                     | 99    | <div><div></div></div> 2.1%  |
| 6                                                                                                                                                           | Disagree                                                                                                                                              | 128   | <div><div></div></div> 2.7%  |
| 7                                                                                                                                                           | Strongly disagree                                                                                                                                     | 51    | <div><div></div></div> 1.1%  |
| 97                                                                                                                                                          | No answer                                                                                                                                             | 25    | <div><div></div></div> 0.5%  |
| 98                                                                                                                                                          | Not asked                                                                                                                                             | 3486  | <div><div></div></div> 74.3% |
| Warning: these figures indicate the number of cases found in the data file. They cannot be interpreted as summary statistics of the population of interest. |                                                                                                                                                       |       |                              |
| # r7dv29_2: Statement: Norwegian Muslims have greater loyalty to other Muslims in the world than to people in this country                                  |                                                                                                                                                       |       |                              |
| Information                                                                                                                                                 | [Type= discrete] [Format=numeric] [Range= 1-7] [Missing=*]                                                                                            |       |                              |
| Statistics [NW/ W]                                                                                                                                          | [Valid=4689 /-] [Invalid=0 /-]                                                                                                                        |       |                              |
| Pre-question                                                                                                                                                | Please look at the statements below. To what extent do you agree or disagree with them?                                                               |       |                              |
| Literal question                                                                                                                                            | Norwegian Muslims have greater loyalty to other Muslims in the world than to people in this country.                                                  |       |                              |
| Interviewer's instructions                                                                                                                                  | [Asked if u=4. ]                                                                                                                                      |       |                              |
| Notes                                                                                                                                                       | Norske muslimer er mer lojale overfor andre muslimer i verden enn overfor folk i dette landet. (Se på utsagnene nedenfor                              |       |                              |
| Value                                                                                                                                                       | Label                                                                                                                                                 | Cases | Percentage                   |
| 1                                                                                                                                                           | Strongly agree                                                                                                                                        | 125   | <div><div></div></div> 2.7%  |
| 2                                                                                                                                                           | Agree                                                                                                                                                 | 191   | <div><div></div></div> 4.1%  |
| 3                                                                                                                                                           | Somewhat agree                                                                                                                                        | 238   | <div><div></div></div> 5.1%  |
| 4                                                                                                                                                           | Neither agree nor disagree                                                                                                                            | 345   | <div><div></div></div> 7.4%  |

**# r7dv29\_2: Statement: Norwegian Muslims have greater loyalty to other Muslims in the world than to people in this country**

| Value | Label             | Cases | Percentage |
|-------|-------------------|-------|------------|
| 5     | Somewhat disagree | 119   | 2.5%       |
| 6     | Disagree          | 132   | 2.8%       |
| 7     | Strongly disagree | 23    | 0.5%       |
| 97    | No answer         | 30    | 0.6%       |
| 98    | Not asked         | 3486  | 74.3%      |

Warning: these figures indicate the number of cases found in the data file. They cannot be interpreted as summary statistics of the population of interest.

**# r7dv29\_3: Statement: Norway will lose its identity if more Muslims**

|                                   |                                                                                                                        |
|-----------------------------------|------------------------------------------------------------------------------------------------------------------------|
| <b>Information</b>                | [Type= discrete] [Format=numeric] [Range= 1-7] [Missing=*]                                                             |
| <b>Statistics [NW/ W]</b>         | [Valid=4689 /-] [Invalid=0 /-]                                                                                         |
| <b>Pre-question</b>               | Please look at the statements below. To what extent do you agree or disagree with them?                                |
| <b>Literal question</b>           | Norway will end up losing its identity if more Muslims are allowed to live here.                                       |
| <b>Interviewer's instructions</b> | [Asked if u=4. ]                                                                                                       |
| <b>Notes</b>                      | Norge kommer til å miste sin identitet hvis flere muslimer kommer for å bo her. (Se på utsagnene nedenfor. Hvor enig e |

| Value | Label                      | Cases | Percentage |
|-------|----------------------------|-------|------------|
| 1     | Strongly agree             | 138   | 2.9%       |
| 2     | Agree                      | 135   | 2.9%       |
| 3     | Somewhat agree             | 233   | 5.0%       |
| 4     | Neither agree nor disagree | 157   | 3.3%       |
| 5     | Somewhat disagree          | 129   | 2.8%       |
| 6     | Disagree                   | 268   | 5.7%       |
| 7     | Strongly disagree          | 112   | 2.4%       |
| 97    | No answer                  | 31    | 0.7%       |
| 98    | Not asked                  | 3486  | 74.3%      |

Warning: these figures indicate the number of cases found in the data file. They cannot be interpreted as summary statistics of the population of interest.

**# r7dv39: How often do you think/read/talk about something related to 22. July?**

|                                   |                                                                                                                                   |
|-----------------------------------|-----------------------------------------------------------------------------------------------------------------------------------|
| <b>Information</b>                | [Type= discrete] [Format=numeric] [Range= 1-5] [Missing=*]                                                                        |
| <b>Statistics [NW/ W]</b>         | [Valid=4689 /-] [Invalid=0 /-]                                                                                                    |
| <b>Pre-question</b>               | It's now been more than five years since the attacks on the government quarter (Regjeringskvartalet) and Utøya of 22 July 2011.   |
| <b>Literal question</b>           | As for you personally, how often would you say that you now think about, read or talk about something that is related to 22 July? |
| <b>Interviewer's instructions</b> | [Asked if u=4. ]                                                                                                                  |
| <b>Notes</b>                      | Nå har det gått mer enn fem år siden angrepene på regjeringskvartalet og Utøya 22. juli 2011. Når det gjelder deg p               |

| Value | Label                      | Cases | Percentage |
|-------|----------------------------|-------|------------|
| 1     | Daily                      | 4     | 0.1%       |
| 2     | Weekly                     | 63    | 1.3%       |
| 3     | A couple of times a month  | 261   | 5.6%       |
| 4     | Less often, but it happens | 732   | 15.6%      |
| 5     | Never                      | 113   | 2.4%       |
| 97    | No answer                  | 30    | 0.6%       |
| 98    | Not asked                  | 3486  | 74.3%      |

Warning: these figures indicate the number of cases found in the data file. They cannot be interpreted as summary statistics of the population of interest.

| # r7dvby3_1: Extent of fear of new terrorist attack in Norway                                                                                               |                                                                                                                                               |       |            |
|-------------------------------------------------------------------------------------------------------------------------------------------------------------|-----------------------------------------------------------------------------------------------------------------------------------------------|-------|------------|
| Information                                                                                                                                                 | [Type= discrete] [Format=numeric] [Range= 1-5] [Missing=*]                                                                                    |       |            |
| Statistics [NW/ W]                                                                                                                                          | [Valid=4689 /-] [Invalid=0 /-]                                                                                                                |       |            |
| Literal question                                                                                                                                            | To what extent do you fear that there will be a new terrorist attack in Norway?                                                               |       |            |
| Interviewer's instructions                                                                                                                                  | [Asked if u=3 OR u=4. ]                                                                                                                       |       |            |
| Notes                                                                                                                                                       | R7DVBY3_1 (I hvor stor grad er du redd for at vi skal oppleve et nytt terrorangrep i Norge?)                                                  |       |            |
| Value                                                                                                                                                       | Label                                                                                                                                         | Cases | Percentage |
| 1                                                                                                                                                           | To a very great extent                                                                                                                        | 94    | 2.0%       |
| 2                                                                                                                                                           | To a great extent                                                                                                                             | 326   | 7.0%       |
| 3                                                                                                                                                           | Somewhat                                                                                                                                      | 948   | 20.2%      |
| 4                                                                                                                                                           | Slightly                                                                                                                                      | 769   | 16.4%      |
| 5                                                                                                                                                           | Not at all                                                                                                                                    | 117   | 2.5%       |
| 97                                                                                                                                                          | No answer                                                                                                                                     | 52    | 1.1%       |
| 98                                                                                                                                                          | Not asked                                                                                                                                     | 2383  | 50.8%      |
| Warning: these figures indicate the number of cases found in the data file. They cannot be interpreted as summary statistics of the population of interest. |                                                                                                                                               |       |            |
| # r7dvby4: Danger of terrorist attack become greater/less last couple of years                                                                              |                                                                                                                                               |       |            |
| Information                                                                                                                                                 | [Type= discrete] [Format=numeric] [Range= 1-3] [Missing=*]                                                                                    |       |            |
| Statistics [NW/ W]                                                                                                                                          | [Valid=4689 /-] [Invalid=0 /-]                                                                                                                |       |            |
| Literal question                                                                                                                                            | In your experience, has the danger of a terrorist attack become greater or less during the last couple of years, or has there been no change? |       |            |
| Interviewer's instructions                                                                                                                                  | [Asked if u=3 OR u=4. ]                                                                                                                       |       |            |
| Notes                                                                                                                                                       | Slik du opplever det, har terrorfaren i Norge blitt større eller mindre de siste par årene, eller har det ikke vært no                        |       |            |
| Value                                                                                                                                                       | Label                                                                                                                                         | Cases | Percentage |
| 1                                                                                                                                                           | Greater                                                                                                                                       | 1195  | 25.5%      |
| 2                                                                                                                                                           | Less                                                                                                                                          | 90    | 1.9%       |
| 3                                                                                                                                                           | No change to the danger of terror                                                                                                             | 961   | 20.5%      |
| 97                                                                                                                                                          | No answer                                                                                                                                     | 60    | 1.3%       |
| 98                                                                                                                                                          | Not asked                                                                                                                                     | 2383  | 50.8%      |
| Warning: these figures indicate the number of cases found in the data file. They cannot be interpreted as summary statistics of the population of interest. |                                                                                                                                               |       |            |
| # r7pad9_1: Statement: Can in general rely on the Supreme Court taking the right decisions                                                                  |                                                                                                                                               |       |            |
| Information                                                                                                                                                 | [Type= discrete] [Format=numeric] [Range= 1-7] [Missing=*]                                                                                    |       |            |
| Statistics [NW/ W]                                                                                                                                          | [Valid=4689 /-] [Invalid=0 /-]                                                                                                                |       |            |
| Pre-question                                                                                                                                                | In general, to what extent do you agree or disagree with the following statements?                                                            |       |            |
| Literal question                                                                                                                                            | We can in general rely on the Supreme Court of Norway taking the right decisions.                                                             |       |            |
| Interviewer's instructions                                                                                                                                  | [Asked if u=3. ]                                                                                                                              |       |            |
| Notes                                                                                                                                                       | Vi kan som regel stole på at Norges Høyesterett tar riktige avgjørelser. (Generelt sett, i hvilken grad er du enig ell                        |       |            |
| Value                                                                                                                                                       | Label                                                                                                                                         | Cases | Percentage |
| 1                                                                                                                                                           | Strongly agree                                                                                                                                | 187   | 4.0%       |
| 2                                                                                                                                                           | Agree                                                                                                                                         | 609   | 13.0%      |
| 3                                                                                                                                                           | Somewhat agree                                                                                                                                | 147   | 3.1%       |
| 4                                                                                                                                                           | Neither agree nor disagree                                                                                                                    | 76    | 1.6%       |
| 5                                                                                                                                                           | Somewhat disagree                                                                                                                             | 38    | 0.8%       |
| 6                                                                                                                                                           | Disagree                                                                                                                                      | 13    | 0.3%       |
| 7                                                                                                                                                           | Strongly disagree                                                                                                                             | 1     | 0.0%       |

| # r7pad9_1: Statement: Can in general rely on the Supreme Court taking the right decisions                                                                  |                                                                                                                         |       |            |
|-------------------------------------------------------------------------------------------------------------------------------------------------------------|-------------------------------------------------------------------------------------------------------------------------|-------|------------|
| Value                                                                                                                                                       | Label                                                                                                                   | Cases | Percentage |
| 97                                                                                                                                                          | No answer                                                                                                               | 32    | 0.7%       |
| 98                                                                                                                                                          | Not asked                                                                                                               | 3586  | 76.5%      |
| Warning: these figures indicate the number of cases found in the data file. They cannot be interpreted as summary statistics of the population of interest. |                                                                                                                         |       |            |
| # r7pad9_2: Statement: Power of the Supreme Court in controversial cases must be reduced                                                                    |                                                                                                                         |       |            |
| Information                                                                                                                                                 | [Type= discrete] [Format=numeric] [Range= 1-7] [Missing=*]                                                              |       |            |
| Statistics [NW/ W]                                                                                                                                          | [Valid=4689 /-] [Invalid=0 /-]                                                                                          |       |            |
| Pre-question                                                                                                                                                | In general, to what extent do you agree or disagree with the following statements?                                      |       |            |
| Literal question                                                                                                                                            | The power of the Supreme Court of Norway to decide some types of controversial cases must be reduced.                   |       |            |
| Interviewer's instructions                                                                                                                                  | [Asked if u=3. ]                                                                                                        |       |            |
| Notes                                                                                                                                                       | Norges Høyesteretts makt til å avgjøre visse typer kontroversielle saker bør reduseres. (Generelt sett, i hvilken gra   |       |            |
| Value                                                                                                                                                       | Label                                                                                                                   | Cases | Percentage |
| 1                                                                                                                                                           | Strongly agree                                                                                                          | 19    | 0.4%       |
| 2                                                                                                                                                           | Agree                                                                                                                   | 87    | 1.9%       |
| 3                                                                                                                                                           | Somewhat agree                                                                                                          | 138   | 2.9%       |
| 4                                                                                                                                                           | Neither agree nor disagree                                                                                              | 351   | 7.5%       |
| 5                                                                                                                                                           | Somewhat disagree                                                                                                       | 104   | 2.2%       |
| 6                                                                                                                                                           | Disagree                                                                                                                | 284   | 6.1%       |
| 7                                                                                                                                                           | Strongly disagree                                                                                                       | 77    | 1.6%       |
| 97                                                                                                                                                          | No answer                                                                                                               | 43    | 0.9%       |
| 98                                                                                                                                                          | Not asked                                                                                                               | 3586  | 76.5%      |
| Warning: these figures indicate the number of cases found in the data file. They cannot be interpreted as summary statistics of the population of interest. |                                                                                                                         |       |            |
| # r7pad9_3: Statement: Supreme Court favours some groups                                                                                                    |                                                                                                                         |       |            |
| Information                                                                                                                                                 | [Type= discrete] [Format=numeric] [Range= 1-7] [Missing=*]                                                              |       |            |
| Statistics [NW/ W]                                                                                                                                          | [Valid=4689 /-] [Invalid=0 /-]                                                                                          |       |            |
| Pre-question                                                                                                                                                | In general, to what extent do you agree or disagree with the following statements?                                      |       |            |
| Literal question                                                                                                                                            | The decisions from the Supreme Court of Norway favour some groups more than others.                                     |       |            |
| Interviewer's instructions                                                                                                                                  | [Asked if u=3. ]                                                                                                        |       |            |
| Notes                                                                                                                                                       | Avgjørelsene til Norges Høyesterett favoriserer enkelte grupper mer enn andre. (Generelt sett, i hvilken grad er du eni |       |            |
| Value                                                                                                                                                       | Label                                                                                                                   | Cases | Percentage |
| 1                                                                                                                                                           | Strongly agree                                                                                                          | 14    | 0.3%       |
| 2                                                                                                                                                           | Agree                                                                                                                   | 42    | 0.9%       |
| 3                                                                                                                                                           | Somewhat agree                                                                                                          | 142   | 3.0%       |
| 4                                                                                                                                                           | Neither agree nor disagree                                                                                              | 450   | 9.6%       |
| 5                                                                                                                                                           | Somewhat disagree                                                                                                       | 79    | 1.7%       |
| 6                                                                                                                                                           | Disagree                                                                                                                | 259   | 5.5%       |
| 7                                                                                                                                                           | Strongly disagree                                                                                                       | 79    | 1.7%       |
| 97                                                                                                                                                          | No answer                                                                                                               | 38    | 0.8%       |
| 98                                                                                                                                                          | Not asked                                                                                                               | 3586  | 76.5%      |
| Warning: these figures indicate the number of cases found in the data file. They cannot be interpreted as summary statistics of the population of interest. |                                                                                                                         |       |            |
| # r7pad9_4: Statement: Abolish Supreme Court if it makes too many decisions most people disagree with                                                       |                                                                                                                         |       |            |
| Information                                                                                                                                                 | [Type= discrete] [Format=numeric] [Range= 1-7] [Missing=*]                                                              |       |            |
| Statistics [NW/ W]                                                                                                                                          | [Valid=4689 /-] [Invalid=0 /-]                                                                                          |       |            |

|                                                                                                                                                             |                                                                                                                                                                                                        |       |            |
|-------------------------------------------------------------------------------------------------------------------------------------------------------------|--------------------------------------------------------------------------------------------------------------------------------------------------------------------------------------------------------|-------|------------|
| # r7pad9_4: Statement: Abolish Supreme Court if it makes too many decisions most people disagree with                                                       |                                                                                                                                                                                                        |       |            |
| Pre-question                                                                                                                                                | In general, to what extent do you agree or disagree with the following statements?                                                                                                                     |       |            |
| Literal question                                                                                                                                            | If the Supreme Court of Norway starts to make too many decisions most people disagree with, it might be an advantage to abolish the court altogether.                                                  |       |            |
| Interviewer's instructions                                                                                                                                  | [Asked if u=3. ]                                                                                                                                                                                       |       |            |
| Notes                                                                                                                                                       | Dersom Norges Høyesterett begynner å ta mange avgjørelser som folk flest er uenige i, kan det være like greit å avsk                                                                                   |       |            |
| Value                                                                                                                                                       | Label                                                                                                                                                                                                  | Cases | Percentage |
| 1                                                                                                                                                           | Strongly agree                                                                                                                                                                                         | 18    | 0.4%       |
| 2                                                                                                                                                           | Agree                                                                                                                                                                                                  | 39    | 0.8%       |
| 3                                                                                                                                                           | Somewhat agree                                                                                                                                                                                         | 112   | 2.4%       |
| 4                                                                                                                                                           | Neither agree nor disagree                                                                                                                                                                             | 213   | 4.5%       |
| 5                                                                                                                                                           | Somewhat disagree                                                                                                                                                                                      | 141   | 3.0%       |
| 6                                                                                                                                                           | Disagree                                                                                                                                                                                               | 328   | 7.0%       |
| 7                                                                                                                                                           | Strongly disagree                                                                                                                                                                                      | 214   | 4.6%       |
| 97                                                                                                                                                          | No answer                                                                                                                                                                                              | 38    | 0.8%       |
| 98                                                                                                                                                          | Not asked                                                                                                                                                                                              | 3586  | 76.5%      |
| Warning: these figures indicate the number of cases found in the data file. They cannot be interpreted as summary statistics of the population of interest. |                                                                                                                                                                                                        |       |            |
| # r7ran31: [Randomizes if u=3. ]                                                                                                                            |                                                                                                                                                                                                        |       |            |
| Information                                                                                                                                                 | [Type= discrete] [Format=numeric] [Range= 1-6] [Missing=*]                                                                                                                                             |       |            |
| Statistics [NW/ W]                                                                                                                                          | [Valid=1080 /-] [Invalid=3609 /-]                                                                                                                                                                      |       |            |
| Interviewer's instructions                                                                                                                                  | [Randomizes if u=3. ]                                                                                                                                                                                  |       |            |
| Value                                                                                                                                                       | Label                                                                                                                                                                                                  | Cases | Percentage |
| 1                                                                                                                                                           | 1                                                                                                                                                                                                      | 177   | 16.4%      |
| 2                                                                                                                                                           | 2                                                                                                                                                                                                      | 173   | 16.0%      |
| 3                                                                                                                                                           | 3                                                                                                                                                                                                      | 184   | 17.0%      |
| 4                                                                                                                                                           | 4                                                                                                                                                                                                      | 187   | 17.3%      |
| 5                                                                                                                                                           | 5                                                                                                                                                                                                      | 214   | 19.8%      |
| 6                                                                                                                                                           | 6                                                                                                                                                                                                      | 145   | 13.4%      |
| Sysmiss                                                                                                                                                     |                                                                                                                                                                                                        | 3609  |            |
| Warning: these figures indicate the number of cases found in the data file. They cannot be interpreted as summary statistics of the population of interest. |                                                                                                                                                                                                        |       |            |
| # r7pad11a: Acceptable: Decision, immigrant children of parents that are illegal residents right to remain if parents deported                              |                                                                                                                                                                                                        |       |            |
| Information                                                                                                                                                 | [Type= discrete] [Format=numeric] [Range= 1-5] [Missing=*]                                                                                                                                             |       |            |
| Statistics [NW/ W]                                                                                                                                          | [Valid=4689 /-] [Invalid=0 /-]                                                                                                                                                                         |       |            |
| Pre-question                                                                                                                                                | There are many immigrant children of parents that are illegal residents in Norway. Imagine that the Supreme Court decided these children have a right to remain in Norway if the parents are deported. |       |            |
| Literal question                                                                                                                                            | In general, to what extent do you think this would be an acceptable decision by the Supreme Court?                                                                                                     |       |            |
| Interviewer's instructions                                                                                                                                  | [Asked if u=3 and ran31=1. ]                                                                                                                                                                           |       |            |
| Notes                                                                                                                                                       | Det finnes flere innvandrerbarn som har foreldre som oppholder seg ulovlig i Norge. Se for deg at Høyesterett besluttet                                                                                |       |            |
| Value                                                                                                                                                       | Label                                                                                                                                                                                                  | Cases | Percentage |
| 1                                                                                                                                                           | Very acceptable                                                                                                                                                                                        | 18    | 0.4%       |
| 2                                                                                                                                                           | Acceptable                                                                                                                                                                                             | 64    | 1.4%       |
| 3                                                                                                                                                           | Somewhat acceptable                                                                                                                                                                                    | 38    | 0.8%       |
| 4                                                                                                                                                           | Not very acceptable                                                                                                                                                                                    | 41    | 0.9%       |
| 5                                                                                                                                                           | Not acceptable at all                                                                                                                                                                                  | 14    | 0.3%       |

### # r7pad11a: Acceptable: Decision, immigrant children of parents that are illegal residents right to remain if parents deported

| Value | Label     | Cases | Percentage |
|-------|-----------|-------|------------|
| 97    | No answer | 2     | 0.0%       |
| 98    | Not asked | 4512  | 96.2%      |

Warning: these figures indicate the number of cases found in the data file. They cannot be interpreted as summary statistics of the population of interest.

### # r7pad11b: Acceptable: Decision, immigrant children of parents that are illegal residents not right to remain if parents deported

|                            |                                                                                                                                                                                                               |
|----------------------------|---------------------------------------------------------------------------------------------------------------------------------------------------------------------------------------------------------------|
| Information                | [Type= discrete] [Format=numeric] [Range= 1-5] [Missing=*]                                                                                                                                                    |
| Statistics [NW/ W]         | [Valid=4689 /-] [Invalid=0 /-]                                                                                                                                                                                |
| Pre-question               | There are many immigrant children of parents that are illegal residents in Norway. Imagine that the Supreme Court decided these children do not have a right to remain in Norway if the parents are deported. |
| Literal question           | In general, to what extent do you think this would be an acceptable decision by the Supreme Court?                                                                                                            |
| Interviewer's instructions | [Asked if u=3 and ran31=2. ]                                                                                                                                                                                  |
| Notes                      | Det finnes flere innvandrerbarn som har foreldre som oppholder seg ulovlig i Norge. Se for deg at Høyesterett besluttet                                                                                       |

| Value | Label                 | Cases | Percentage |
|-------|-----------------------|-------|------------|
| 1     | Very acceptable       | 20    | 0.4%       |
| 2     | Acceptable            | 51    | 1.1%       |
| 3     | Somewhat acceptable   | 39    | 0.8%       |
| 4     | Not very acceptable   | 52    | 1.1%       |
| 5     | Not acceptable at all | 11    | 0.2%       |
| 97    | No answer             | 0     |            |
| 98    | Not asked             | 4516  | 96.3%      |

Warning: these figures indicate the number of cases found in the data file. They cannot be interpreted as summary statistics of the population of interest.

### # r7pad11c: Acceptable: Unanimous, immigrant children of parents that are illegal residents right to remain if parents deported

|                            |                                                                                                                                                                                                                         |
|----------------------------|-------------------------------------------------------------------------------------------------------------------------------------------------------------------------------------------------------------------------|
| Information                | [Type= discrete] [Format=numeric] [Range= 1-5] [Missing=*]                                                                                                                                                              |
| Statistics [NW/ W]         | [Valid=4689 /-] [Invalid=0 /-]                                                                                                                                                                                          |
| Pre-question               | There are many immigrant children of parents that are illegal residents in Norway. Imagine that the Supreme Court unanimously decided that these children have a right to remain in Norway if the parents are deported. |
| Literal question           | In general, to what extent do you think this would be an acceptable decision by the Supreme Court?                                                                                                                      |
| Interviewer's instructions | [Asked if u=3 and ran31=3. ]                                                                                                                                                                                            |
| Notes                      | Det finnes flere innvandrerbarn som har foreldre som oppholder seg ulovlig i Norge. Se for deg at Høyesterett i en enste                                                                                                |

| Value | Label                 | Cases | Percentage |
|-------|-----------------------|-------|------------|
| 1     | Very acceptable       | 33    | 0.7%       |
| 2     | Acceptable            | 68    | 1.5%       |
| 3     | Somewhat acceptable   | 27    | 0.6%       |
| 4     | Not very acceptable   | 36    | 0.8%       |
| 5     | Not acceptable at all | 15    | 0.3%       |
| 97    | No answer             | 5     | 0.1%       |
| 98    | Not asked             | 4505  | 96.1%      |

Warning: these figures indicate the number of cases found in the data file. They cannot be interpreted as summary statistics of the population of interest.

### # r7pad11d: Acceptable: Unanimous, immigrant children of parents that are illegal residents not right to remain if parents deported

|             |                                                            |
|-------------|------------------------------------------------------------|
| Information | [Type= discrete] [Format=numeric] [Range= 1-5] [Missing=*] |
|-------------|------------------------------------------------------------|

|                                                                                                                                                             |                                                                                                                                                                                                                                                                   |       |            |
|-------------------------------------------------------------------------------------------------------------------------------------------------------------|-------------------------------------------------------------------------------------------------------------------------------------------------------------------------------------------------------------------------------------------------------------------|-------|------------|
| <b># r7pad11d: Acceptable: Unanimous, immigrant children of parents that are illegal residents not right to remain if parents deported</b>                  |                                                                                                                                                                                                                                                                   |       |            |
| Statistics [NW/ W]                                                                                                                                          | [Valid=4689 /-] [Invalid=0 /-]                                                                                                                                                                                                                                    |       |            |
| Pre-question                                                                                                                                                | There are many immigrant children of parents that are illegal residents in Norway. Imagine that the Supreme Court unanimously decided that these children do not have a right to remain in Norway if the parents are deported.                                    |       |            |
| Literal question                                                                                                                                            | In general, to what extent do you think this would be an acceptable decision by the Supreme Court?                                                                                                                                                                |       |            |
| Interviewer's instructions                                                                                                                                  | [Asked if u=3 and ran31=4. ]                                                                                                                                                                                                                                      |       |            |
| Notes                                                                                                                                                       | Det finnes flere innvandrerbarn som har foreldre som oppholder seg ulovlig i Norge. Se for deg at Høyesterett i en enste                                                                                                                                          |       |            |
| Value                                                                                                                                                       | Label                                                                                                                                                                                                                                                             | Cases | Percentage |
| 1                                                                                                                                                           | Very acceptable                                                                                                                                                                                                                                                   | 22    | 0.5%       |
| 2                                                                                                                                                           | Acceptable                                                                                                                                                                                                                                                        | 57    | 1.2%       |
| 3                                                                                                                                                           | Somewhat acceptable                                                                                                                                                                                                                                               | 36    | 0.8%       |
| 4                                                                                                                                                           | Not very acceptable                                                                                                                                                                                                                                               | 50    | 1.1%       |
| 5                                                                                                                                                           | Not acceptable at all                                                                                                                                                                                                                                             | 19    | 0.4%       |
| 97                                                                                                                                                          | No answer                                                                                                                                                                                                                                                         | 3     | 0.1%       |
| 98                                                                                                                                                          | Not asked                                                                                                                                                                                                                                                         | 4502  | 96.0%      |
| Warning: these figures indicate the number of cases found in the data file. They cannot be interpreted as summary statistics of the population of interest. |                                                                                                                                                                                                                                                                   |       |            |
| <b># r7pad11e: Acceptable: Bare majority, immigrant children of parents that are illegal residents right to remain if parents deported</b>                  |                                                                                                                                                                                                                                                                   |       |            |
| Information                                                                                                                                                 | [Type= discrete] [Format=numeric] [Range= 1-5] [Missing=*]                                                                                                                                                                                                        |       |            |
| Statistics [NW/ W]                                                                                                                                          | [Valid=4689 /-] [Invalid=0 /-]                                                                                                                                                                                                                                    |       |            |
| Pre-question                                                                                                                                                | There are many immigrant children of parents that are illegal residents in Norway. Imagine that the Supreme Court by a bare majority of three against two judges decided that these children have a right to remain in Norway if the parents are deported.        |       |            |
| Literal question                                                                                                                                            | In general, to what extent do you think this would be an acceptable decision by the Supreme Court?                                                                                                                                                                |       |            |
| Interviewer's instructions                                                                                                                                  | [Asked if u=3 and ran31=5. ]                                                                                                                                                                                                                                      |       |            |
| Notes                                                                                                                                                       | Det finnes flere innvandrerbarn som har foreldre som oppholder seg ulovlig i Norge. Se for deg at Høyesterett ved et kna                                                                                                                                          |       |            |
| Value                                                                                                                                                       | Label                                                                                                                                                                                                                                                             | Cases | Percentage |
| 1                                                                                                                                                           | Very acceptable                                                                                                                                                                                                                                                   | 25    | 0.5%       |
| 2                                                                                                                                                           | Acceptable                                                                                                                                                                                                                                                        | 98    | 2.1%       |
| 3                                                                                                                                                           | Somewhat acceptable                                                                                                                                                                                                                                               | 42    | 0.9%       |
| 4                                                                                                                                                           | Not very acceptable                                                                                                                                                                                                                                               | 27    | 0.6%       |
| 5                                                                                                                                                           | Not acceptable at all                                                                                                                                                                                                                                             | 17    | 0.4%       |
| 97                                                                                                                                                          | No answer                                                                                                                                                                                                                                                         | 5     | 0.1%       |
| 98                                                                                                                                                          | Not asked                                                                                                                                                                                                                                                         | 4475  | 95.4%      |
| Warning: these figures indicate the number of cases found in the data file. They cannot be interpreted as summary statistics of the population of interest. |                                                                                                                                                                                                                                                                   |       |            |
| <b># r7pad11f: Acceptable: Bare majority, immigrant children of parents that are illegal residents not right to remain if parents deported</b>              |                                                                                                                                                                                                                                                                   |       |            |
| Information                                                                                                                                                 | [Type= discrete] [Format=numeric] [Range= 1-5] [Missing=*]                                                                                                                                                                                                        |       |            |
| Statistics [NW/ W]                                                                                                                                          | [Valid=4689 /-] [Invalid=0 /-]                                                                                                                                                                                                                                    |       |            |
| Pre-question                                                                                                                                                | There are many immigrant children of parents that are illegal residents in Norway. Imagine that the Supreme Court by a bare majority of three against two judges decided that these children do not have a right to remain in Norway if the parents are deported. |       |            |
| Literal question                                                                                                                                            | In general, to what extent do you think this would be an acceptable decision by the Supreme Court?                                                                                                                                                                |       |            |
| Interviewer's instructions                                                                                                                                  | [Asked if u=3 and ran31=6. ]                                                                                                                                                                                                                                      |       |            |
| Notes                                                                                                                                                       | Det finnes flere innvandrerbarn som har foreldre som oppholder seg ulovlig i Norge. Se for deg at Høyesterett ved et kna                                                                                                                                          |       |            |



**# r7pad11f: Acceptable: Bare majority, immigrant children of parents that are illegal residents not right to remain if parents deported**

| Value | Label                 | Cases | Percentage |
|-------|-----------------------|-------|------------|
| 1     | Very acceptable       | 17    | 0.4%       |
| 2     | Acceptable            | 49    | 1.0%       |
| 3     | Somewhat acceptable   | 34    | 0.7%       |
| 4     | Not very acceptable   | 36    | 0.8%       |
| 5     | Not acceptable at all | 5     | 0.1%       |
| 97    | No answer             | 4     | 0.1%       |
| 98    | Not asked             | 4544  | 96.9%      |

*Warning: these figures indicate the number of cases found in the data file. They cannot be interpreted as summary statistics of the population of interest.*

**# r7ran32: [Randomizes if u=3. ]**

|                                   |                                                            |
|-----------------------------------|------------------------------------------------------------|
| <b>Information</b>                | [Type= discrete] [Format=numeric] [Range= 1-6] [Missing=*] |
| <b>Statistics [NW/ W]</b>         | [Valid=1080 /-] [Invalid=3609 /-]                          |
| <b>Interviewer's instructions</b> | [Randomizes if u=3. ]                                      |

| Value   | Label | Cases | Percentage |
|---------|-------|-------|------------|
| 1       | 1     | 201   | 18.6%      |
| 2       | 2     | 164   | 15.2%      |
| 3       | 3     | 181   | 16.8%      |
| 4       | 4     | 186   | 17.2%      |
| 5       | 5     | 171   | 15.8%      |
| 6       | 6     | 177   | 16.4%      |
| Sysmiss |       | 3609  |            |

*Warning: these figures indicate the number of cases found in the data file. They cannot be interpreted as summary statistics of the population of interest.*

**# r7pad12a: Acceptable: Decision, employers allowed to read texts on phones issued by the company**

|                                   |                                                                                                                                                                                                                                                          |
|-----------------------------------|----------------------------------------------------------------------------------------------------------------------------------------------------------------------------------------------------------------------------------------------------------|
| <b>Information</b>                | [Type= discrete] [Format=numeric] [Range= 1-5] [Missing=*]                                                                                                                                                                                               |
| <b>Statistics [NW/ W]</b>         | [Valid=4689 /-] [Invalid=0 /-]                                                                                                                                                                                                                           |
| <b>Pre-question</b>               | Many employers give their employees mobile phones to use for work. Imagine that the Supreme Court decided that employers should be allowed to read all the text messages and e-mails contained on the telephones issued to the employees by the company. |
| <b>Literal question</b>           | In general, to what extent do you think this would be an acceptable decision by the Supreme Court?                                                                                                                                                       |
| <b>Interviewer's instructions</b> | [Asked if u=3 and ran32=1. ]                                                                                                                                                                                                                             |
| <b>Notes</b>                      | Flere arbeidsgivere gir sine ansatte mobiltelefon som skal brukes til arbeid. Se for deg at Høyesterett besluttet at arb                                                                                                                                 |

| Value | Label                 | Cases | Percentage |
|-------|-----------------------|-------|------------|
| 1     | Very acceptable       | 10    | 0.2%       |
| 2     | Acceptable            | 42    | 0.9%       |
| 3     | Somewhat acceptable   | 33    | 0.7%       |
| 4     | Not very acceptable   | 58    | 1.2%       |
| 5     | Not acceptable at all | 53    | 1.1%       |
| 97    | No answer             | 5     | 0.1%       |
| 98    | Not asked             | 4488  | 95.7%      |

*Warning: these figures indicate the number of cases found in the data file. They cannot be interpreted as summary statistics of the population of interest.*

**# r7pad12b: Acceptable: Decision, employers not allowed to read texts on phones issued by the company**

|                           |                                                            |
|---------------------------|------------------------------------------------------------|
| <b>Information</b>        | [Type= discrete] [Format=numeric] [Range= 1-5] [Missing=*] |
| <b>Statistics [NW/ W]</b> | [Valid=4689 /-] [Invalid=0 /-]                             |

| # r7pad12b: Acceptable: Decision, employers not allowed to read texts on phones issued by the company                                                       |                                                                                                                                                                                                                                                                          |       |            |
|-------------------------------------------------------------------------------------------------------------------------------------------------------------|--------------------------------------------------------------------------------------------------------------------------------------------------------------------------------------------------------------------------------------------------------------------------|-------|------------|
| Pre-question                                                                                                                                                | Many employers give their employees mobile phones to use for work. Imagine that the Supreme Court decided that employers are not to be allowed to read all the text messages and e-mails contained on the telephones issued to the employees by the company.             |       |            |
| Literal question                                                                                                                                            | In general, to what extent do you think this would be an acceptable decision by the Supreme Court?                                                                                                                                                                       |       |            |
| Interviewer's instructions                                                                                                                                  | [Asked if u=3 and ran32=2. ]                                                                                                                                                                                                                                             |       |            |
| Notes                                                                                                                                                       | Flere arbeidsgivere gir sine ansatte mobiltelefon som skal brukes til arbeid. Se for deg at Høyesterett besluttet at arb                                                                                                                                                 |       |            |
| Value                                                                                                                                                       | Label                                                                                                                                                                                                                                                                    | Cases | Percentage |
| 1                                                                                                                                                           | Very acceptable                                                                                                                                                                                                                                                          | 51    | 1.1%       |
| 2                                                                                                                                                           | Acceptable                                                                                                                                                                                                                                                               | 67    | 1.4%       |
| 3                                                                                                                                                           | Somewhat acceptable                                                                                                                                                                                                                                                      | 13    | 0.3%       |
| 4                                                                                                                                                           | Not very acceptable                                                                                                                                                                                                                                                      | 17    | 0.4%       |
| 5                                                                                                                                                           | Not acceptable at all                                                                                                                                                                                                                                                    | 10    | 0.2%       |
| 97                                                                                                                                                          | No answer                                                                                                                                                                                                                                                                | 6     | 0.1%       |
| 98                                                                                                                                                          | Not asked                                                                                                                                                                                                                                                                | 4525  | 96.5%      |
| Warning: these figures indicate the number of cases found in the data file. They cannot be interpreted as summary statistics of the population of interest. |                                                                                                                                                                                                                                                                          |       |            |
| # r7pad12c: Acceptable: Unanimous, employers allowed to read texts on phones issued by the company                                                          |                                                                                                                                                                                                                                                                          |       |            |
| Information                                                                                                                                                 | [Type= discrete] [Format=numeric] [Range= 1-5] [Missing=*]                                                                                                                                                                                                               |       |            |
| Statistics [NW/ W]                                                                                                                                          | [Valid=4689 /-] [Invalid=0 /-]                                                                                                                                                                                                                                           |       |            |
| Pre-question                                                                                                                                                | Many employers give their employees mobile phones to use for work. Imagine that the Supreme Court unanimously decided that employers should be allowed to read all the text messages and e-mails contained on the telephones issued to the employees by the company.     |       |            |
| Literal question                                                                                                                                            | In general, to what extent do you think this would be an acceptable decision by the Supreme Court?                                                                                                                                                                       |       |            |
| Interviewer's instructions                                                                                                                                  | [Asked if u=3 and ran32=3. ]                                                                                                                                                                                                                                             |       |            |
| Notes                                                                                                                                                       | Flere arbeidsgivere gir sine ansatte mobiltelefon som skal brukes til arbeid. Se for deg at Høyesterett i en enstemmig a                                                                                                                                                 |       |            |
| Value                                                                                                                                                       | Label                                                                                                                                                                                                                                                                    | Cases | Percentage |
| 1                                                                                                                                                           | Very acceptable                                                                                                                                                                                                                                                          | 6     | 0.1%       |
| 2                                                                                                                                                           | Acceptable                                                                                                                                                                                                                                                               | 40    | 0.9%       |
| 3                                                                                                                                                           | Somewhat acceptable                                                                                                                                                                                                                                                      | 23    | 0.5%       |
| 4                                                                                                                                                           | Not very acceptable                                                                                                                                                                                                                                                      | 58    | 1.2%       |
| 5                                                                                                                                                           | Not acceptable at all                                                                                                                                                                                                                                                    | 47    | 1.0%       |
| 97                                                                                                                                                          | No answer                                                                                                                                                                                                                                                                | 7     | 0.1%       |
| 98                                                                                                                                                          | Not asked                                                                                                                                                                                                                                                                | 4508  | 96.1%      |
| Warning: these figures indicate the number of cases found in the data file. They cannot be interpreted as summary statistics of the population of interest. |                                                                                                                                                                                                                                                                          |       |            |
| # r7pad12d: Acceptable: Unanimous, employers not allowed to read texts on phones issued by the company                                                      |                                                                                                                                                                                                                                                                          |       |            |
| Information                                                                                                                                                 | [Type= discrete] [Format=numeric] [Range= 1-5] [Missing=*]                                                                                                                                                                                                               |       |            |
| Statistics [NW/ W]                                                                                                                                          | [Valid=4689 /-] [Invalid=0 /-]                                                                                                                                                                                                                                           |       |            |
| Pre-question                                                                                                                                                | Many employers give their employees mobile phones to use for work. Imagine that the Supreme Court unanimously decided that employers should not be allowed to read all the text messages and e-mails contained on the telephones issued to the employees by the company. |       |            |
| Literal question                                                                                                                                            | In general, to what extent do you think this would be an acceptable decision by the Supreme Court?                                                                                                                                                                       |       |            |
| Interviewer's instructions                                                                                                                                  | [Asked if u=3 and ran32=4. ]                                                                                                                                                                                                                                             |       |            |
| Notes                                                                                                                                                       | Flere arbeidsgivere gir sine ansatte mobiltelefon som skal brukes til arbeid. Se for deg at Høyesterett i en enstemmig a                                                                                                                                                 |       |            |
| Value                                                                                                                                                       | Label                                                                                                                                                                                                                                                                    | Cases | Percentage |
| 1                                                                                                                                                           | Very acceptable                                                                                                                                                                                                                                                          | 66    | 1.4%       |
| 2                                                                                                                                                           | Acceptable                                                                                                                                                                                                                                                               | 70    | 1.5%       |

### # r7pad12d: Acceptable: Unanimous, employers not allowed to read texts on phones issued by the company

| Value | Label                 | Cases | Percentage |
|-------|-----------------------|-------|------------|
| 3     | Somewhat acceptable   | 15    | 0.3%       |
| 4     | Not very acceptable   | 19    | 0.4%       |
| 5     | Not acceptable at all | 12    | 0.3%       |
| 97    | No answer             | 4     | 0.1%       |
| 98    | Not asked             | 4503  | 96.0%      |

Warning: these figures indicate the number of cases found in the data file. They cannot be interpreted as summary statistics of the population of interest.

### # r7pad12e: Acceptable: Bare majority, employers allowed to read texts on phones issued by the company

|                            |                                                                                                                                                                                                                                                                                                         |
|----------------------------|---------------------------------------------------------------------------------------------------------------------------------------------------------------------------------------------------------------------------------------------------------------------------------------------------------|
| Information                | [Type= discrete] [Format=numeric] [Range= 1-5] [Missing=*]                                                                                                                                                                                                                                              |
| Statistics [NW/ W]         | [Valid=4689 /-] [Invalid=0 /-]                                                                                                                                                                                                                                                                          |
| Pre-question               | Many employers give their employees mobile phones to use for work. Imagine that the Supreme Court by a bare majority of three against two judges decided that employers should be allowed to read all the text messages and e-mails contained on the telephones issued to the employees by the company. |
| Literal question           | In general, to what extent do you think this would be an acceptable decision by the Supreme Court?                                                                                                                                                                                                      |
| Interviewer's instructions | [Asked if u=3 and ran32=5. ]                                                                                                                                                                                                                                                                            |
| Notes                      | Flere arbeidsgivere gir sine ansatte mobiltelefon som skal brukes til arbeid. Se for deg Høyesterett ved et knapt flerta                                                                                                                                                                                |

| Value | Label                 | Cases | Percentage |
|-------|-----------------------|-------|------------|
| 1     | Very acceptable       | 7     | 0.1%       |
| 2     | Acceptable            | 40    | 0.9%       |
| 3     | Somewhat acceptable   | 33    | 0.7%       |
| 4     | Not very acceptable   | 42    | 0.9%       |
| 5     | Not acceptable at all | 45    | 1.0%       |
| 97    | No answer             | 4     | 0.1%       |
| 98    | Not asked             | 4518  | 96.4%      |

Warning: these figures indicate the number of cases found in the data file. They cannot be interpreted as summary statistics of the population of interest.

### # r7pad12f: Acceptable: Bare majority, employers not allowed to read texts on phones issued by the company

|                            |                                                                                                                                                                                                                                                                                                             |
|----------------------------|-------------------------------------------------------------------------------------------------------------------------------------------------------------------------------------------------------------------------------------------------------------------------------------------------------------|
| Information                | [Type= discrete] [Format=numeric] [Range= 1-5] [Missing=*]                                                                                                                                                                                                                                                  |
| Statistics [NW/ W]         | [Valid=4689 /-] [Invalid=0 /-]                                                                                                                                                                                                                                                                              |
| Pre-question               | Many employers give their employees mobile phones to use for work. Imagine that the Supreme Court by a bare majority of three against two judges decided that employers should not be allowed to read all the text messages and e-mails contained on the telephones issued to the employees by the company. |
| Literal question           | In general, to what extent do you think this would be an acceptable decision by the Supreme Court?                                                                                                                                                                                                          |
| Interviewer's instructions | [Asked if u=3 and ran32=6. ]                                                                                                                                                                                                                                                                                |
| Notes                      | Flere arbeidsgivere gir sine ansatte mobiltelefon som skal brukes til arbeid. Se for deg at Høyesterett ved et knapt fle                                                                                                                                                                                    |

| Value | Label                 | Cases | Percentage |
|-------|-----------------------|-------|------------|
| 1     | Very acceptable       | 57    | 1.2%       |
| 2     | Acceptable            | 72    | 1.5%       |
| 3     | Somewhat acceptable   | 15    | 0.3%       |
| 4     | Not very acceptable   | 14    | 0.3%       |
| 5     | Not acceptable at all | 12    | 0.3%       |
| 97    | No answer             | 7     | 0.1%       |
| 98    | Not asked             | 4512  | 96.2%      |

Warning: these figures indicate the number of cases found in the data file. They cannot be interpreted as summary statistics of the population of interest.

### # r7ran33: [Randomizes if u=3. ]

|             |                                                            |
|-------------|------------------------------------------------------------|
| Information | [Type= discrete] [Format=numeric] [Range= 1-6] [Missing=*] |
|-------------|------------------------------------------------------------|

| # r7ran33: [Randomizes if u=3. ]                                                                                                                            |                                                                                                                                                                                                                                                                                                                         |       |                              |
|-------------------------------------------------------------------------------------------------------------------------------------------------------------|-------------------------------------------------------------------------------------------------------------------------------------------------------------------------------------------------------------------------------------------------------------------------------------------------------------------------|-------|------------------------------|
| Statistics [NW/ W]                                                                                                                                          | [Valid=1080 /-] [Invalid=3609 /-]                                                                                                                                                                                                                                                                                       |       |                              |
| Interviewer's instructions                                                                                                                                  | [Randomizes if u=3. ]                                                                                                                                                                                                                                                                                                   |       |                              |
| Value                                                                                                                                                       | Label                                                                                                                                                                                                                                                                                                                   | Cases | Percentage                   |
| 1                                                                                                                                                           | 1                                                                                                                                                                                                                                                                                                                       | 189   | <div><div></div></div> 17.5% |
| 2                                                                                                                                                           | 2                                                                                                                                                                                                                                                                                                                       | 177   | <div><div></div></div> 16.4% |
| 3                                                                                                                                                           | 3                                                                                                                                                                                                                                                                                                                       | 156   | <div><div></div></div> 14.4% |
| 4                                                                                                                                                           | 4                                                                                                                                                                                                                                                                                                                       | 163   | <div><div></div></div> 15.1% |
| 5                                                                                                                                                           | 5                                                                                                                                                                                                                                                                                                                       | 194   | <div><div></div></div> 18.0% |
| 6                                                                                                                                                           | 6                                                                                                                                                                                                                                                                                                                       | 201   | <div><div></div></div> 18.6% |
| Sysmiss                                                                                                                                                     |                                                                                                                                                                                                                                                                                                                         | 3609  |                              |
| Warning: these figures indicate the number of cases found in the data file. They cannot be interpreted as summary statistics of the population of interest. |                                                                                                                                                                                                                                                                                                                         |       |                              |
| # r7pad13a: Acceptable: Decision, neighbour disputes allowed to go to court before mediation                                                                |                                                                                                                                                                                                                                                                                                                         |       |                              |
| Information                                                                                                                                                 | [Type= discrete] [Format=numeric] [Range= 1-5] [Missing=*]                                                                                                                                                                                                                                                              |       |                              |
| Statistics [NW/ W]                                                                                                                                          | [Valid=4689 /-] [Invalid=0 /-]                                                                                                                                                                                                                                                                                          |       |                              |
| Pre-question                                                                                                                                                | Many thousands of neighbour disputes arise in Norway every year. Imagine that the Supreme Court decided that the people involved in neighbour disputes (for example the height of trees and fences) are to be allowed to go directly to the courts without first having tried to resolve the conflict by mediation.     |       |                              |
| Literal question                                                                                                                                            | In general, to what extent do you think this would be an acceptable decision by the Supreme Court?                                                                                                                                                                                                                      |       |                              |
| Interviewer's instructions                                                                                                                                  | [Asked if u=3 and ran33=1. ]                                                                                                                                                                                                                                                                                            |       |                              |
| Notes                                                                                                                                                       | Hvert år oppstår det tusenvis av nabokonflikter i Norge. Se for deg at Høyesterett besluttet at personer som er involv                                                                                                                                                                                                  |       |                              |
| Value                                                                                                                                                       | Label                                                                                                                                                                                                                                                                                                                   | Cases | Percentage                   |
| 1                                                                                                                                                           | Very acceptable                                                                                                                                                                                                                                                                                                         | 4     | <div><div></div></div> 0.1%  |
| 2                                                                                                                                                           | Acceptable                                                                                                                                                                                                                                                                                                              | 16    | <div><div></div></div> 0.3%  |
| 3                                                                                                                                                           | Somewhat acceptable                                                                                                                                                                                                                                                                                                     | 19    | <div><div></div></div> 0.4%  |
| 4                                                                                                                                                           | Not very acceptable                                                                                                                                                                                                                                                                                                     | 80    | <div><div></div></div> 1.7%  |
| 5                                                                                                                                                           | Not acceptable at all                                                                                                                                                                                                                                                                                                   | 64    | <div><div></div></div> 1.4%  |
| 97                                                                                                                                                          | No answer                                                                                                                                                                                                                                                                                                               | 6     | <div><div></div></div> 0.1%  |
| 98                                                                                                                                                          | Not asked                                                                                                                                                                                                                                                                                                               | 4500  | <div><div></div></div> 96.0% |
| Warning: these figures indicate the number of cases found in the data file. They cannot be interpreted as summary statistics of the population of interest. |                                                                                                                                                                                                                                                                                                                         |       |                              |
| # r7pad13b: Acceptable: Decision, neighbour disputes not allowed to go to court before mediation                                                            |                                                                                                                                                                                                                                                                                                                         |       |                              |
| Information                                                                                                                                                 | [Type= discrete] [Format=numeric] [Range= 1-5] [Missing=*]                                                                                                                                                                                                                                                              |       |                              |
| Statistics [NW/ W]                                                                                                                                          | [Valid=4689 /-] [Invalid=0 /-]                                                                                                                                                                                                                                                                                          |       |                              |
| Pre-question                                                                                                                                                | Many thousands of neighbour disputes arise in Norway every year. Imagine that the Supreme Court decided that the people involved in neighbour disputes (for example the height of trees and fences) are not to be allowed to go directly to the courts without first having tried to resolve the conflict by mediation. |       |                              |
| Literal question                                                                                                                                            | In general, to what extent do you think this would be an acceptable decision by the Supreme Court?                                                                                                                                                                                                                      |       |                              |
| Interviewer's instructions                                                                                                                                  | [Asked if u=3 and ran33=2. ]                                                                                                                                                                                                                                                                                            |       |                              |
| Notes                                                                                                                                                       | Hvert år oppstår det tusenvis av nabokonflikter i Norge. Se for deg at Høyesterett besluttet at personer som er involv                                                                                                                                                                                                  |       |                              |
| Value                                                                                                                                                       | Label                                                                                                                                                                                                                                                                                                                   | Cases | Percentage                   |
| 1                                                                                                                                                           | Very acceptable                                                                                                                                                                                                                                                                                                         | 69    | <div><div></div></div> 1.5%  |
| 2                                                                                                                                                           | Acceptable                                                                                                                                                                                                                                                                                                              | 71    | <div><div></div></div> 1.5%  |
| 3                                                                                                                                                           | Somewhat acceptable                                                                                                                                                                                                                                                                                                     | 13    | <div><div></div></div> 0.3%  |
| 4                                                                                                                                                           | Not very acceptable                                                                                                                                                                                                                                                                                                     | 12    | <div><div></div></div> 0.3%  |
| 5                                                                                                                                                           | Not acceptable at all                                                                                                                                                                                                                                                                                                   | 7     | <div><div></div></div> 0.1%  |

| # r7pad13b: Acceptable: Decision, neighbour disputes not allowed to go to court before mediation                                                            |                                                                                                                                                                                                                                                                                                                                     |       |            |
|-------------------------------------------------------------------------------------------------------------------------------------------------------------|-------------------------------------------------------------------------------------------------------------------------------------------------------------------------------------------------------------------------------------------------------------------------------------------------------------------------------------|-------|------------|
| Value                                                                                                                                                       | Label                                                                                                                                                                                                                                                                                                                               | Cases | Percentage |
| 97                                                                                                                                                          | No answer                                                                                                                                                                                                                                                                                                                           | 5     | 0.1%       |
| 98                                                                                                                                                          | Not asked                                                                                                                                                                                                                                                                                                                           | 4512  | 96.2%      |
| Warning: these figures indicate the number of cases found in the data file. They cannot be interpreted as summary statistics of the population of interest. |                                                                                                                                                                                                                                                                                                                                     |       |            |
| # r7pad13c: Acceptable: Unanimous, neighbour disputes allowed to go to court before mediation                                                               |                                                                                                                                                                                                                                                                                                                                     |       |            |
| Information                                                                                                                                                 | [Type= discrete] [Format=numeric] [Range= 1-5] [Missing=*]                                                                                                                                                                                                                                                                          |       |            |
| Statistics [NW/ W]                                                                                                                                          | [Valid=4689 /-] [Invalid=0 /-]                                                                                                                                                                                                                                                                                                      |       |            |
| Pre-question                                                                                                                                                | Many thousands of neighbour disputes arise in Norway every year. Imagine that the Supreme Court unanimously decided that the people involved in neighbour disputes (for example the height of trees and fences) are to be allowed to go directly to the courts without first having tried to resolve the conflict by mediation.     |       |            |
| Literal question                                                                                                                                            | In general, to what extent do you think this would be an acceptable decision by the Supreme Court?                                                                                                                                                                                                                                  |       |            |
| Interviewer's instructions                                                                                                                                  | [Asked if u=3 and ran33=3. ]                                                                                                                                                                                                                                                                                                        |       |            |
| Notes                                                                                                                                                       | Hvert år oppstår det tusenvis av nabokonflikter i Norge. Se for deg at Høyesterett i en enstemmig avgjørelse beslutte                                                                                                                                                                                                               |       |            |
| Value                                                                                                                                                       | Label                                                                                                                                                                                                                                                                                                                               | Cases | Percentage |
| 1                                                                                                                                                           | Very acceptable                                                                                                                                                                                                                                                                                                                     | 2     | 0.0%       |
| 2                                                                                                                                                           | Acceptable                                                                                                                                                                                                                                                                                                                          | 16    | 0.3%       |
| 3                                                                                                                                                           | Somewhat acceptable                                                                                                                                                                                                                                                                                                                 | 24    | 0.5%       |
| 4                                                                                                                                                           | Not very acceptable                                                                                                                                                                                                                                                                                                                 | 65    | 1.4%       |
| 5                                                                                                                                                           | Not acceptable at all                                                                                                                                                                                                                                                                                                               | 44    | 0.9%       |
| 97                                                                                                                                                          | No answer                                                                                                                                                                                                                                                                                                                           | 5     | 0.1%       |
| 98                                                                                                                                                          | Not asked                                                                                                                                                                                                                                                                                                                           | 4533  | 96.7%      |
| Warning: these figures indicate the number of cases found in the data file. They cannot be interpreted as summary statistics of the population of interest. |                                                                                                                                                                                                                                                                                                                                     |       |            |
| # r7pad13d: Acceptable: Unanimous, neighbour disputes not allowed to go to court before mediation                                                           |                                                                                                                                                                                                                                                                                                                                     |       |            |
| Information                                                                                                                                                 | [Type= discrete] [Format=numeric] [Range= 1-5] [Missing=*]                                                                                                                                                                                                                                                                          |       |            |
| Statistics [NW/ W]                                                                                                                                          | [Valid=4689 /-] [Invalid=0 /-]                                                                                                                                                                                                                                                                                                      |       |            |
| Pre-question                                                                                                                                                | Many thousands of neighbour disputes arise in Norway every year. Imagine that the Supreme Court unanimously decided that the people involved in neighbour disputes (for example the height of trees and fences) are not to be allowed to go directly to the courts without first having tried to resolve the conflict by mediation. |       |            |
| Literal question                                                                                                                                            | In general, to what extent do you think this would be an acceptable decision by the Supreme Court?                                                                                                                                                                                                                                  |       |            |
| Interviewer's instructions                                                                                                                                  | [Asked if u=3 and ran33=4. ]                                                                                                                                                                                                                                                                                                        |       |            |
| Notes                                                                                                                                                       | Hvert år oppstår det tusenvis av nabokonflikter i Norge. Se for deg at Høyesterett i en enstemmig avgjørelse beslutte                                                                                                                                                                                                               |       |            |
| Value                                                                                                                                                       | Label                                                                                                                                                                                                                                                                                                                               | Cases | Percentage |
| 1                                                                                                                                                           | Very acceptable                                                                                                                                                                                                                                                                                                                     | 76    | 1.6%       |
| 2                                                                                                                                                           | Acceptable                                                                                                                                                                                                                                                                                                                          | 57    | 1.2%       |
| 3                                                                                                                                                           | Somewhat acceptable                                                                                                                                                                                                                                                                                                                 | 14    | 0.3%       |
| 4                                                                                                                                                           | Not very acceptable                                                                                                                                                                                                                                                                                                                 | 6     | 0.1%       |
| 5                                                                                                                                                           | Not acceptable at all                                                                                                                                                                                                                                                                                                               | 5     | 0.1%       |
| 97                                                                                                                                                          | No answer                                                                                                                                                                                                                                                                                                                           | 5     | 0.1%       |
| 98                                                                                                                                                          | Not asked                                                                                                                                                                                                                                                                                                                           | 4526  | 96.5%      |
| Warning: these figures indicate the number of cases found in the data file. They cannot be interpreted as summary statistics of the population of interest. |                                                                                                                                                                                                                                                                                                                                     |       |            |
| # r7pad13e: Acceptable: Bare majority, neighbour disputes allowed to go to court before mediation                                                           |                                                                                                                                                                                                                                                                                                                                     |       |            |
| Information                                                                                                                                                 | [Type= discrete] [Format=numeric] [Range= 1-5] [Missing=*]                                                                                                                                                                                                                                                                          |       |            |
| Statistics [NW/ W]                                                                                                                                          | [Valid=4689 /-] [Invalid=0 /-]                                                                                                                                                                                                                                                                                                      |       |            |

| # r7pad13e: Acceptable: Bare majority, neighbour disputes allowed to go to court before mediation                                                           |                       |                                                                                                                                                                                                                                                                                                                                                                        |                   |  |
|-------------------------------------------------------------------------------------------------------------------------------------------------------------|-----------------------|------------------------------------------------------------------------------------------------------------------------------------------------------------------------------------------------------------------------------------------------------------------------------------------------------------------------------------------------------------------------|-------------------|--|
| Pre-question                                                                                                                                                |                       | Many thousands of neighbour disputes arise in Norway every year. Imagine that the Supreme Court by a bare majority of three against two judges decided that the people involved in neighbour disputes (for example the height of trees and fences) are to be allowed to go directly to the courts without first having tried to resolve the conflict by mediation.     |                   |  |
| Literal question                                                                                                                                            |                       | In general, to what extent do you think this would be an acceptable decision by the Supreme Court?                                                                                                                                                                                                                                                                     |                   |  |
| Interviewer's instructions                                                                                                                                  |                       | [Asked if u=3 and ran33=5. ]                                                                                                                                                                                                                                                                                                                                           |                   |  |
| Notes                                                                                                                                                       |                       | Hvert år oppstår det tusenvis av nabokonflikter i Norge. Se for deg at Høyesterett ved et knapt flertall på tre mot t                                                                                                                                                                                                                                                  |                   |  |
| Value                                                                                                                                                       | Label                 | Cases                                                                                                                                                                                                                                                                                                                                                                  | Percentage        |  |
| 1                                                                                                                                                           | Very acceptable       | 3                                                                                                                                                                                                                                                                                                                                                                      | <div></div> 0.1%  |  |
| 2                                                                                                                                                           | Acceptable            | 23                                                                                                                                                                                                                                                                                                                                                                     | <div></div> 0.5%  |  |
| 3                                                                                                                                                           | Somewhat acceptable   | 28                                                                                                                                                                                                                                                                                                                                                                     | <div></div> 0.6%  |  |
| 4                                                                                                                                                           | Not very acceptable   | 82                                                                                                                                                                                                                                                                                                                                                                     | <div></div> 1.7%  |  |
| 5                                                                                                                                                           | Not acceptable at all | 51                                                                                                                                                                                                                                                                                                                                                                     | <div></div> 1.1%  |  |
| 97                                                                                                                                                          | No answer             | 7                                                                                                                                                                                                                                                                                                                                                                      | <div></div> 0.1%  |  |
| 98                                                                                                                                                          | Not asked             | 4495                                                                                                                                                                                                                                                                                                                                                                   | <div></div> 95.9% |  |
| Warning: these figures indicate the number of cases found in the data file. They cannot be interpreted as summary statistics of the population of interest. |                       |                                                                                                                                                                                                                                                                                                                                                                        |                   |  |
| # r7pad13f: Acceptable: Bare majority, neighbour disputes not allowed to go to court before mediation                                                       |                       |                                                                                                                                                                                                                                                                                                                                                                        |                   |  |
| Information                                                                                                                                                 |                       | [Type= discrete] [Format=numeric] [Range= 1-5] [Missing=*]                                                                                                                                                                                                                                                                                                             |                   |  |
| Statistics [NW/ W]                                                                                                                                          |                       | [Valid=4689 /-] [Invalid=0 /-]                                                                                                                                                                                                                                                                                                                                         |                   |  |
| Pre-question                                                                                                                                                |                       | Many thousands of neighbour disputes arise in Norway every year. Imagine that the Supreme Court by a bare majority of three against two judges decided that the people involved in neighbour disputes (for example the height of trees and fences) are not to be allowed to go directly to the courts without first having tried to resolve the conflict by mediation. |                   |  |
| Literal question                                                                                                                                            |                       | In general, to what extent do you think this would be an acceptable decision by the Supreme Court?                                                                                                                                                                                                                                                                     |                   |  |
| Interviewer's instructions                                                                                                                                  |                       | [Asked if u=3 and ran33=6. ]                                                                                                                                                                                                                                                                                                                                           |                   |  |
| Notes                                                                                                                                                       |                       | Hvert år oppstår det tusenvis av nabokonflikter i Norge. Se for deg at Høyesterett ved et knapt flertall på tre mot t                                                                                                                                                                                                                                                  |                   |  |
| Value                                                                                                                                                       | Label                 | Cases                                                                                                                                                                                                                                                                                                                                                                  | Percentage        |  |
| 1                                                                                                                                                           | Very acceptable       | 82                                                                                                                                                                                                                                                                                                                                                                     | <div></div> 1.7%  |  |
| 2                                                                                                                                                           | Acceptable            | 76                                                                                                                                                                                                                                                                                                                                                                     | <div></div> 1.6%  |  |
| 3                                                                                                                                                           | Somewhat acceptable   | 26                                                                                                                                                                                                                                                                                                                                                                     | <div></div> 0.6%  |  |
| 4                                                                                                                                                           | Not very acceptable   | 7                                                                                                                                                                                                                                                                                                                                                                      | <div></div> 0.1%  |  |
| 5                                                                                                                                                           | Not acceptable at all | 3                                                                                                                                                                                                                                                                                                                                                                      | <div></div> 0.1%  |  |
| 97                                                                                                                                                          | No answer             | 7                                                                                                                                                                                                                                                                                                                                                                      | <div></div> 0.1%  |  |
| 98                                                                                                                                                          | Not asked             | 4488                                                                                                                                                                                                                                                                                                                                                                   | <div></div> 95.7% |  |
| Warning: these figures indicate the number of cases found in the data file. They cannot be interpreted as summary statistics of the population of interest. |                       |                                                                                                                                                                                                                                                                                                                                                                        |                   |  |
| # r7ran17: [Randomizes if u=4. ]                                                                                                                            |                       |                                                                                                                                                                                                                                                                                                                                                                        |                   |  |
| Information                                                                                                                                                 |                       | [Type= discrete] [Format=numeric] [Range= 1-5] [Missing=*]                                                                                                                                                                                                                                                                                                             |                   |  |
| Statistics [NW/ W]                                                                                                                                          |                       | [Valid=1184 /-] [Invalid=3505 /-]                                                                                                                                                                                                                                                                                                                                      |                   |  |
| Interviewer's instructions                                                                                                                                  |                       | [Randomizes if u=4. ]                                                                                                                                                                                                                                                                                                                                                  |                   |  |
| Value                                                                                                                                                       | Label                 | Cases                                                                                                                                                                                                                                                                                                                                                                  | Percentage        |  |
| 1                                                                                                                                                           | 1                     | 235                                                                                                                                                                                                                                                                                                                                                                    | <div></div> 19.8% |  |
| 2                                                                                                                                                           | 2                     | 221                                                                                                                                                                                                                                                                                                                                                                    | <div></div> 18.7% |  |
| 3                                                                                                                                                           | 3                     | 245                                                                                                                                                                                                                                                                                                                                                                    | <div></div> 20.7% |  |
| 4                                                                                                                                                           | 4                     | 225                                                                                                                                                                                                                                                                                                                                                                    | <div></div> 19.0% |  |
| 5                                                                                                                                                           | 5                     | 258                                                                                                                                                                                                                                                                                                                                                                    | <div></div> 21.8% |  |
| Sysmiss                                                                                                                                                     |                       | 3505                                                                                                                                                                                                                                                                                                                                                                   |                   |  |
| Warning: these figures indicate the number of cases found in the data file. They cannot be interpreted as summary statistics of the population of interest. |                       |                                                                                                                                                                                                                                                                                                                                                                        |                   |  |

| # r7pad1a: Agree/disagree: Authorities given leave to detain persons they believe might be potential terrorists, suggested in Britain                       |                                                                                                                                                                                                                                                                                                                                                                                                                                                                                                                                                                                                                                 |       |            |
|-------------------------------------------------------------------------------------------------------------------------------------------------------------|---------------------------------------------------------------------------------------------------------------------------------------------------------------------------------------------------------------------------------------------------------------------------------------------------------------------------------------------------------------------------------------------------------------------------------------------------------------------------------------------------------------------------------------------------------------------------------------------------------------------------------|-------|------------|
| Information                                                                                                                                                 | [Type= discrete] [Format=numeric] [Range= 1-7] [Missing=*]                                                                                                                                                                                                                                                                                                                                                                                                                                                                                                                                                                      |       |            |
| Statistics [NW/ W]                                                                                                                                          | [Valid=4689 /-] [Invalid=0 /-]                                                                                                                                                                                                                                                                                                                                                                                                                                                                                                                                                                                                  |       |            |
| Pre-question                                                                                                                                                | In Britain it has been suggested that the authorities should be given leave to detain (keep in detention without a formal charge and without trial) persons they believe might be potential terrorists.<br>Imagine that the authorities in Norway ask permission to detain persons they believe might be involved in terrorist activity. Some are of the opinion that the authorities should be given leave because this might reduce the risk of terrorism, others are of the opinion that the authorities should not be given leave because this is a breach of the basic rule that everyone is innocent until proven guilty. |       |            |
| Literal question                                                                                                                                            | To what extent do you agree or disagree to the authorities being given leave to detain persons they believe might be potential terrorists?                                                                                                                                                                                                                                                                                                                                                                                                                                                                                      |       |            |
| Interviewer's instructions                                                                                                                                  | [Asked if u=4 and ran17=1. ]                                                                                                                                                                                                                                                                                                                                                                                                                                                                                                                                                                                                    |       |            |
| Notes                                                                                                                                                       | I Storbritannia er det foreslått å gi myndighetene lov til å internere (holde i forvaring uten formell siktelse og dom                                                                                                                                                                                                                                                                                                                                                                                                                                                                                                          |       |            |
| Value                                                                                                                                                       | Label                                                                                                                                                                                                                                                                                                                                                                                                                                                                                                                                                                                                                           | Cases | Percentage |
| 1                                                                                                                                                           | Strongly agree                                                                                                                                                                                                                                                                                                                                                                                                                                                                                                                                                                                                                  | 35    | 0.7%       |
| 2                                                                                                                                                           | Agree                                                                                                                                                                                                                                                                                                                                                                                                                                                                                                                                                                                                                           | 46    | 1.0%       |
| 3                                                                                                                                                           | Somewhat agree                                                                                                                                                                                                                                                                                                                                                                                                                                                                                                                                                                                                                  | 67    | 1.4%       |
| 4                                                                                                                                                           | Neither agree nor disagree                                                                                                                                                                                                                                                                                                                                                                                                                                                                                                                                                                                                      | 20    | 0.4%       |
| 5                                                                                                                                                           | Somewhat disagree                                                                                                                                                                                                                                                                                                                                                                                                                                                                                                                                                                                                               | 22    | 0.5%       |
| 6                                                                                                                                                           | Disagree                                                                                                                                                                                                                                                                                                                                                                                                                                                                                                                                                                                                                        | 27    | 0.6%       |
| 7                                                                                                                                                           | Strongly disagree                                                                                                                                                                                                                                                                                                                                                                                                                                                                                                                                                                                                               | 15    | 0.3%       |
| 97                                                                                                                                                          | No answer                                                                                                                                                                                                                                                                                                                                                                                                                                                                                                                                                                                                                       | 3     | 0.1%       |
| 98                                                                                                                                                          | Not asked                                                                                                                                                                                                                                                                                                                                                                                                                                                                                                                                                                                                                       | 4454  | 95.0%      |
| Warning: these figures indicate the number of cases found in the data file. They cannot be interpreted as summary statistics of the population of interest. |                                                                                                                                                                                                                                                                                                                                                                                                                                                                                                                                                                                                                                 |       |            |
| # r7pad1b: Agree/disagree: Authorities given leave to detain persons they believe might be potential terrorists, suggested in Denmark                       |                                                                                                                                                                                                                                                                                                                                                                                                                                                                                                                                                                                                                                 |       |            |
| Information                                                                                                                                                 | [Type= discrete] [Format=numeric] [Range= 1-7] [Missing=*]                                                                                                                                                                                                                                                                                                                                                                                                                                                                                                                                                                      |       |            |
| Statistics [NW/ W]                                                                                                                                          | [Valid=4689 /-] [Invalid=0 /-]                                                                                                                                                                                                                                                                                                                                                                                                                                                                                                                                                                                                  |       |            |
| Pre-question                                                                                                                                                | In Denmark it has been suggested that the authorities should be given leave to detain (keep in detention without a formal charge and without trial) persons they believe might be potential terrorists.<br>Imagine that the authorities in Norway ask permission to detain persons they believe might be involved in terrorist activity. Some are of the opinion that the authorities should be given leave because this might reduce the risk of terrorism, others are of the opinion that the authorities should not be given leave because this is a breach of the basic rule that everyone is innocent until proven guilty. |       |            |
| Literal question                                                                                                                                            | To what extent do you agree or disagree to the authorities being given leave to detain persons they believe might be potential terrorists?                                                                                                                                                                                                                                                                                                                                                                                                                                                                                      |       |            |
| Interviewer's instructions                                                                                                                                  | [Asked if u=4 and ran17=2. ]                                                                                                                                                                                                                                                                                                                                                                                                                                                                                                                                                                                                    |       |            |
| Notes                                                                                                                                                       | I Danmark er det foreslått å gi myndighetene lov til å internere (holde i forvaring uten formell siktelse og domstolsb                                                                                                                                                                                                                                                                                                                                                                                                                                                                                                          |       |            |
| Value                                                                                                                                                       | Label                                                                                                                                                                                                                                                                                                                                                                                                                                                                                                                                                                                                                           | Cases | Percentage |
| 1                                                                                                                                                           | Strongly agree                                                                                                                                                                                                                                                                                                                                                                                                                                                                                                                                                                                                                  | 37    | 0.8%       |
| 2                                                                                                                                                           | Agree                                                                                                                                                                                                                                                                                                                                                                                                                                                                                                                                                                                                                           | 42    | 0.9%       |
| 3                                                                                                                                                           | Somewhat agree                                                                                                                                                                                                                                                                                                                                                                                                                                                                                                                                                                                                                  | 57    | 1.2%       |
| 4                                                                                                                                                           | Neither agree nor disagree                                                                                                                                                                                                                                                                                                                                                                                                                                                                                                                                                                                                      | 19    | 0.4%       |
| 5                                                                                                                                                           | Somewhat disagree                                                                                                                                                                                                                                                                                                                                                                                                                                                                                                                                                                                                               | 20    | 0.4%       |
| 6                                                                                                                                                           | Disagree                                                                                                                                                                                                                                                                                                                                                                                                                                                                                                                                                                                                                        | 35    | 0.7%       |
| 7                                                                                                                                                           | Strongly disagree                                                                                                                                                                                                                                                                                                                                                                                                                                                                                                                                                                                                               | 8     | 0.2%       |
| 97                                                                                                                                                          | No answer                                                                                                                                                                                                                                                                                                                                                                                                                                                                                                                                                                                                                       | 3     | 0.1%       |
| 98                                                                                                                                                          | Not asked                                                                                                                                                                                                                                                                                                                                                                                                                                                                                                                                                                                                                       | 4468  | 95.3%      |

# # r7pad1b: Agree/disagree: Authorities given leave to detain persons they believe might be potential terrorists, suggested in Denmark

Warning: these figures indicate the number of cases found in the data file. They cannot be interpreted as summary statistics of the population of interest.

# # r7pad1c: Agree/disagree: Authorities given leave to detain persons they believe might be potential terrorists, suggested in Germany

|                            |                                                                                                                                                                                                                                                                                                                                                                                                                                                                                                                                                                                                                                 |
|----------------------------|---------------------------------------------------------------------------------------------------------------------------------------------------------------------------------------------------------------------------------------------------------------------------------------------------------------------------------------------------------------------------------------------------------------------------------------------------------------------------------------------------------------------------------------------------------------------------------------------------------------------------------|
| Information                | [Type= discrete] [Format=numeric] [Range= 1-7] [Missing=*]                                                                                                                                                                                                                                                                                                                                                                                                                                                                                                                                                                      |
| Statistics [NW/ W]         | [Valid=4689 /-] [Invalid=0 /-]                                                                                                                                                                                                                                                                                                                                                                                                                                                                                                                                                                                                  |
| Pre-question               | In Germany it has been suggested that the authorities should be given leave to detain (keep in detention without a formal charge and without trial) persons they believe might be potential terrorists.<br>Imagine that the authorities in Norway ask permission to detain persons they believe might be involved in terrorist activity. Some are of the opinion that the authorities should be given leave because this might reduce the risk of terrorism, others are of the opinion that the authorities should not be given leave because this is a breach of the basic rule that everyone is innocent until proven guilty. |
| Literal question           | To what extent do you agree or disagree to the authorities being given leave to detain persons they believe might be potential terrorists?                                                                                                                                                                                                                                                                                                                                                                                                                                                                                      |
| Interviewer's instructions | [Asked if u=4 and ran17=3. ]                                                                                                                                                                                                                                                                                                                                                                                                                                                                                                                                                                                                    |
| Notes                      | I Tyskland er det foreslått å gi myndighetene lov til å internere (holde i forvaring uten formell siktelse og domstols                                                                                                                                                                                                                                                                                                                                                                                                                                                                                                          |

| Value | Label                      | Cases | Percentage |
|-------|----------------------------|-------|------------|
| 1     | Strongly agree             | 32    | 0.7%       |
| 2     | Agree                      | 47    | 1.0%       |
| 3     | Somewhat agree             | 66    | 1.4%       |
| 4     | Neither agree nor disagree | 29    | 0.6%       |
| 5     | Somewhat disagree          | 27    | 0.6%       |
| 6     | Disagree                   | 25    | 0.5%       |
| 7     | Strongly disagree          | 15    | 0.3%       |
| 97    | No answer                  | 4     | 0.1%       |
| 98    | Not asked                  | 4444  | 94.8%      |

Warning: these figures indicate the number of cases found in the data file. They cannot be interpreted as summary statistics of the population of interest.

# # r7pad1d: Agree/disagree: Authorities given leave to detain persons they believe might be potential terrorists, suggested in the USA

|                            |                                                                                                                                                                                                                                                                                                                                                                                                                                                                                                                                                                                                                                 |
|----------------------------|---------------------------------------------------------------------------------------------------------------------------------------------------------------------------------------------------------------------------------------------------------------------------------------------------------------------------------------------------------------------------------------------------------------------------------------------------------------------------------------------------------------------------------------------------------------------------------------------------------------------------------|
| Information                | [Type= discrete] [Format=numeric] [Range= 1-7] [Missing=*]                                                                                                                                                                                                                                                                                                                                                                                                                                                                                                                                                                      |
| Statistics [NW/ W]         | [Valid=4689 /-] [Invalid=0 /-]                                                                                                                                                                                                                                                                                                                                                                                                                                                                                                                                                                                                  |
| Pre-question               | In the USA it has been suggested that the authorities should be given leave to detain (keep in detention without a formal charge and without trial) persons they believe might be potential terrorists.<br>Imagine that the authorities in Norway ask permission to detain persons they believe might be involved in terrorist activity. Some are of the opinion that the authorities should be given leave because this might reduce the risk of terrorism, others are of the opinion that the authorities should not be given leave because this is a breach of the basic rule that everyone is innocent until proven guilty. |
| Literal question           | To what extent do you agree or disagree to the authorities being given leave to detain persons they believe might be potential terrorists?                                                                                                                                                                                                                                                                                                                                                                                                                                                                                      |
| Interviewer's instructions | [Asked if u=4 and ran17=4. ]                                                                                                                                                                                                                                                                                                                                                                                                                                                                                                                                                                                                    |
| Notes                      | I USA er det foreslått å gi myndighetene lov til å internere (holde i forvaring uten formell siktelse og domstolsbehan                                                                                                                                                                                                                                                                                                                                                                                                                                                                                                          |

| Value | Label                      | Cases | Percentage |
|-------|----------------------------|-------|------------|
| 1     | Strongly agree             | 33    | 0.7%       |
| 2     | Agree                      | 34    | 0.7%       |
| 3     | Somewhat agree             | 59    | 1.3%       |
| 4     | Neither agree nor disagree | 25    | 0.5%       |
| 5     | Somewhat disagree          | 23    | 0.5%       |
| 6     | Disagree                   | 32    | 0.7%       |



**# r7pad1d: Agree/disagree: Authorities given leave to detain persons they believe might be potential terrorists, suggested in the USA**

| Value | Label             | Cases | Percentage |
|-------|-------------------|-------|------------|
| 7     | Strongly disagree | 16    | 0.3%       |
| 97    | No answer         | 3     | 0.1%       |
| 98    | Not asked         | 4464  | 95.2%      |

*Warning: these figures indicate the number of cases found in the data file. They cannot be interpreted as summary statistics of the population of interest.*

**# r7pad1e: Agree/disagree: Authorities given leave to detain persons they believe might be potential terrorists**

|                                   |                                                                                                                                                                                                                                                                                                                                                                                                                                                                                    |
|-----------------------------------|------------------------------------------------------------------------------------------------------------------------------------------------------------------------------------------------------------------------------------------------------------------------------------------------------------------------------------------------------------------------------------------------------------------------------------------------------------------------------------|
| <b>Information</b>                | [Type= discrete] [Format=numeric] [Range= 1-7] [Missing=*]                                                                                                                                                                                                                                                                                                                                                                                                                         |
| <b>Statistics [NW/ W]</b>         | [Valid=4689 /-] [Invalid=0 /-]                                                                                                                                                                                                                                                                                                                                                                                                                                                     |
| <b>Pre-question</b>               | Imagine that the authorities in Norway ask permission to detain (keep in detention without a formal charge and without trial) persons they believe might be involved in terrorist activity. Some are of the opinion that the authorities should be given leave because this might reduce the risk of terrorism, others are of the opinion that the authorities should not be given leave because this is a breach of the basic rule that everyone is innocent until proven guilty. |
| <b>Literal question</b>           | To what extent do you agree or disagree to the authorities being given leave to detain persons they believe might be potential terrorists?                                                                                                                                                                                                                                                                                                                                         |
| <b>Interviewer's instructions</b> | [Asked if u=4 and ran17=5. ]                                                                                                                                                                                                                                                                                                                                                                                                                                                       |
| <b>Notes</b>                      | Se for deg at myndighetene i Norge ber om lov til å internere (holde i forvaring uten formell siktelse og domstolsbehand                                                                                                                                                                                                                                                                                                                                                           |

| Value | Label                      | Cases | Percentage |
|-------|----------------------------|-------|------------|
| 1     | Strongly agree             | 43    | 0.9%       |
| 2     | Agree                      | 53    | 1.1%       |
| 3     | Somewhat agree             | 68    | 1.5%       |
| 4     | Neither agree nor disagree | 29    | 0.6%       |
| 5     | Somewhat disagree          | 18    | 0.4%       |
| 6     | Disagree                   | 31    | 0.7%       |
| 7     | Strongly disagree          | 16    | 0.3%       |
| 97    | No answer                  | 0     |            |
| 98    | Not asked                  | 4431  | 94.5%      |

*Warning: these figures indicate the number of cases found in the data file. They cannot be interpreted as summary statistics of the population of interest.*

**# r7pad2\_1: Done the last year to change society: Boycotted goods**

|                                   |                                                                                                                                                |
|-----------------------------------|------------------------------------------------------------------------------------------------------------------------------------------------|
| <b>Information</b>                | [Type= discrete] [Format=numeric] [Range= 1-1] [Missing=*]                                                                                     |
| <b>Statistics [NW/ W]</b>         | [Valid=4689 /-] [Invalid=0 /-]                                                                                                                 |
| <b>Pre-question</b>               | During the last 12 months have you performed any of the following in an attempt to change conditions in society. More than one answer possible |
| <b>Literal question</b>           | Boycotted goods.                                                                                                                               |
| <b>Interviewer's instructions</b> | [Asked if u=4. ]                                                                                                                               |
| <b>Notes</b>                      | Boikottet varer. (Har du i løpet av de siste 12 månedene gjort noe av det følgende i et forsøk på å endre forhold i                            |

| Value | Label            | Cases | Percentage |
|-------|------------------|-------|------------|
| 0     |                  | 911   | 19.4%      |
| 1     | Boycotted goods. | 269   | 5.7%       |
| 97    | No answer        | 23    | 0.5%       |
| 98    | Not asked        | 3486  | 74.3%      |

*Warning: these figures indicate the number of cases found in the data file. They cannot be interpreted as summary statistics of the population of interest.*

**# r7pad2\_2: Done the last year to change society: Purchased goods based on ethical/moral reasons**

|                           |                                                            |
|---------------------------|------------------------------------------------------------|
| <b>Information</b>        | [Type= discrete] [Format=numeric] [Range= 1-1] [Missing=*] |
| <b>Statistics [NW/ W]</b> | [Valid=4689 /-] [Invalid=0 /-]                             |

|                                                                                                                                                             |                                                                                                                                                |       |                              |
|-------------------------------------------------------------------------------------------------------------------------------------------------------------|------------------------------------------------------------------------------------------------------------------------------------------------|-------|------------------------------|
| # r7pad2_2: Done the last year to change society: Purchased goods based on ethical/moral reasons                                                            |                                                                                                                                                |       |                              |
| Pre-question                                                                                                                                                | During the last 12 months have you performed any of the following in an attempt to change conditions in society. More than one answer possible |       |                              |
| Literal question                                                                                                                                            | Purchased specific goods based on ethical, environmental or moral reasons.                                                                     |       |                              |
| Interviewer's instructions                                                                                                                                  | [Asked if u=4. ]                                                                                                                               |       |                              |
| Notes                                                                                                                                                       | Kjøpt bestemte varer av etiske, miljømessige eller moralske grunner. (Har du i løpet av de siste 12 månedene gjort no                          |       |                              |
| Value                                                                                                                                                       | Label                                                                                                                                          | Cases | Percentage                   |
| 0                                                                                                                                                           |                                                                                                                                                | 800   | <div><div></div></div> 17.1% |
| 1                                                                                                                                                           | Purchased specific goods based on ethical, environmental or moral reasons.                                                                     | 380   | <div><div></div></div> 8.1%  |
| 97                                                                                                                                                          | No answer                                                                                                                                      | 23    | <div><div></div></div> 0.5%  |
| 98                                                                                                                                                          | Not asked                                                                                                                                      | 3486  | <div><div></div></div> 74.3% |
| Warning: these figures indicate the number of cases found in the data file. They cannot be interpreted as summary statistics of the population of interest. |                                                                                                                                                |       |                              |
| # r7pad2_3: Done the last year to change society: Purchased Fairtrade products despite cheaper alternatives                                                 |                                                                                                                                                |       |                              |
| Information                                                                                                                                                 | [Type= discrete] [Format=numeric] [Range= 1-1] [Missing=*]                                                                                     |       |                              |
| Statistics [NW/ W]                                                                                                                                          | [Valid=4689 /-] [Invalid=0 /-]                                                                                                                 |       |                              |
| Pre-question                                                                                                                                                | During the last 12 months have you performed any of the following in an attempt to change conditions in society. More than one answer possible |       |                              |
| Literal question                                                                                                                                            | Purchased Fairtrade products even though other cheaper alternatives were available.                                                            |       |                              |
| Interviewer's instructions                                                                                                                                  | [Asked if u=4. ]                                                                                                                               |       |                              |
| Notes                                                                                                                                                       | Kjøpt fairtrade-produkter selv om det fantes andre, billigere alternativer. (Har du i løpet av de siste 12 månedene gj                         |       |                              |
| Value                                                                                                                                                       | Label                                                                                                                                          | Cases | Percentage                   |
| 0                                                                                                                                                           |                                                                                                                                                | 815   | <div><div></div></div> 17.4% |
| 1                                                                                                                                                           | Purchased Fairtrade products even though other cheaper alternatives were available.                                                            | 365   | <div><div></div></div> 7.8%  |
| 97                                                                                                                                                          | No answer                                                                                                                                      | 23    | <div><div></div></div> 0.5%  |
| 98                                                                                                                                                          | Not asked                                                                                                                                      | 3486  | <div><div></div></div> 74.3% |
| Warning: these figures indicate the number of cases found in the data file. They cannot be interpreted as summary statistics of the population of interest. |                                                                                                                                                |       |                              |
| # r7pad2_4: Done the last year to change society: Purchased organic products despite cheaper alternatives                                                   |                                                                                                                                                |       |                              |
| Information                                                                                                                                                 | [Type= discrete] [Format=numeric] [Range= 1-1] [Missing=*]                                                                                     |       |                              |
| Statistics [NW/ W]                                                                                                                                          | [Valid=4689 /-] [Invalid=0 /-]                                                                                                                 |       |                              |
| Pre-question                                                                                                                                                | During the last 12 months have you performed any of the following in an attempt to change conditions in society. More than one answer possible |       |                              |
| Literal question                                                                                                                                            | Chosen organic products even though other cheaper alternatives were available.                                                                 |       |                              |
| Interviewer's instructions                                                                                                                                  | [Asked if u=4. ]                                                                                                                               |       |                              |
| Notes                                                                                                                                                       | Valgt økologiske varer selv om det fantes andre, billigere alternativer. (Har du i løpet av de siste 12 månedene gjort                         |       |                              |
| Value                                                                                                                                                       | Label                                                                                                                                          | Cases | Percentage                   |
| 0                                                                                                                                                           |                                                                                                                                                | 728   | <div><div></div></div> 15.5% |
| 1                                                                                                                                                           | Chosen organic products even though other cheaper alternatives were available.                                                                 | 452   | <div><div></div></div> 9.6%  |
| 97                                                                                                                                                          | No answer                                                                                                                                      | 23    | <div><div></div></div> 0.5%  |
| 98                                                                                                                                                          | Not asked                                                                                                                                      | 3486  | <div><div></div></div> 74.3% |
| Warning: these figures indicate the number of cases found in the data file. They cannot be interpreted as summary statistics of the population of interest. |                                                                                                                                                |       |                              |
| # r7pad2_5: Done the last year to change society: Reduced/cut the amount of meat in diet                                                                    |                                                                                                                                                |       |                              |
| Information                                                                                                                                                 | [Type= discrete] [Format=numeric] [Range= 1-1] [Missing=*]                                                                                     |       |                              |

| # r7pad2_5: Done the last year to change society: Reduced/cut the amount of meat in diet                                                                    |                                                                                                                                                |       |                              |
|-------------------------------------------------------------------------------------------------------------------------------------------------------------|------------------------------------------------------------------------------------------------------------------------------------------------|-------|------------------------------|
| Statistics [NW/ W]                                                                                                                                          | [Valid=4689 /-] [Invalid=0 /-]                                                                                                                 |       |                              |
| Pre-question                                                                                                                                                | During the last 12 months have you performed any of the following in an attempt to change conditions in society. More than one answer possible |       |                              |
| Literal question                                                                                                                                            | Reduced or cut the amount of meat in your diet.                                                                                                |       |                              |
| Interviewer's instructions                                                                                                                                  | [Asked if u=4. ]                                                                                                                               |       |                              |
| Notes                                                                                                                                                       | Redusert eller kuttet kjøttforbruket ditt. (Har du i løpet av de siste 12 månedene gjort noe av det følgende i et for                          |       |                              |
| Value                                                                                                                                                       | Label                                                                                                                                          | Cases | Percentage                   |
| 0                                                                                                                                                           |                                                                                                                                                | 841   | <div><div></div></div> 17.9% |
| 1                                                                                                                                                           | Reduced or cut the amount of meat in your diet.                                                                                                | 339   | <div><div></div></div> 7.2%  |
| 97                                                                                                                                                          | No answer                                                                                                                                      | 23    | <div><div></div></div> 0.5%  |
| 98                                                                                                                                                          | Not asked                                                                                                                                      | 3486  | <div><div></div></div> 74.3% |
| Warning: these figures indicate the number of cases found in the data file. They cannot be interpreted as summary statistics of the population of interest. |                                                                                                                                                |       |                              |
| # r7pad2_6: Done the last year to change society: Purchased fewer good than normally                                                                        |                                                                                                                                                |       |                              |
| Information                                                                                                                                                 | [Type= discrete] [Format=numeric] [Range= 1-1] [Missing=*]                                                                                     |       |                              |
| Statistics [NW/ W]                                                                                                                                          | [Valid=4689 /-] [Invalid=0 /-]                                                                                                                 |       |                              |
| Pre-question                                                                                                                                                | During the last 12 months have you performed any of the following in an attempt to change conditions in society. More than one answer possible |       |                              |
| Literal question                                                                                                                                            | Purchased fewer goods than you would as a norm.                                                                                                |       |                              |
| Interviewer's instructions                                                                                                                                  | [Asked if u=4. ]                                                                                                                               |       |                              |
| Notes                                                                                                                                                       | Kjøpt færre varer enn du ellers ville. (Har du i løpet av de siste 12 månedene gjort noe av det følgende i et forsø                            |       |                              |
| Value                                                                                                                                                       | Label                                                                                                                                          | Cases | Percentage                   |
| 0                                                                                                                                                           |                                                                                                                                                | 831   | <div><div></div></div> 17.7% |
| 1                                                                                                                                                           | Purchased fewer goods than you would as a norm.                                                                                                | 349   | <div><div></div></div> 7.4%  |
| 97                                                                                                                                                          | No answer                                                                                                                                      | 23    | <div><div></div></div> 0.5%  |
| 98                                                                                                                                                          | Not asked                                                                                                                                      | 3486  | <div><div></div></div> 74.3% |
| Warning: these figures indicate the number of cases found in the data file. They cannot be interpreted as summary statistics of the population of interest. |                                                                                                                                                |       |                              |
| # r7pad2_7: Done the last year to change society: Purchased reusable products instead of new ones                                                           |                                                                                                                                                |       |                              |
| Information                                                                                                                                                 | [Type= discrete] [Format=numeric] [Range= 1-1] [Missing=*]                                                                                     |       |                              |
| Statistics [NW/ W]                                                                                                                                          | [Valid=4689 /-] [Invalid=0 /-]                                                                                                                 |       |                              |
| Pre-question                                                                                                                                                | During the last 12 months have you performed any of the following in an attempt to change conditions in society. More than one answer possible |       |                              |
| Literal question                                                                                                                                            | Purchased reusable products instead of new ones.                                                                                               |       |                              |
| Interviewer's instructions                                                                                                                                  | [Asked if u=4. ]                                                                                                                               |       |                              |
| Notes                                                                                                                                                       | Handlet gjenbruksprodukter heller enn å kjøpe nytt. (Har du i løpet av de siste 12 månedene gjort noe av det følgend                           |       |                              |
| Value                                                                                                                                                       | Label                                                                                                                                          | Cases | Percentage                   |
| 0                                                                                                                                                           |                                                                                                                                                | 832   | <div><div></div></div> 17.7% |
| 1                                                                                                                                                           | Purchased reusable products instead of new ones.                                                                                               | 348   | <div><div></div></div> 7.4%  |
| 97                                                                                                                                                          | No answer                                                                                                                                      | 23    | <div><div></div></div> 0.5%  |
| 98                                                                                                                                                          | Not asked                                                                                                                                      | 3486  | <div><div></div></div> 74.3% |
| Warning: these figures indicate the number of cases found in the data file. They cannot be interpreted as summary statistics of the population of interest. |                                                                                                                                                |       |                              |
| # r7pad2_8: Done the last year to change society: Participated in protest against brand/shop                                                                |                                                                                                                                                |       |                              |
| Information                                                                                                                                                 | [Type= discrete] [Format=numeric] [Range= 1-1] [Missing=*]                                                                                     |       |                              |
| Statistics [NW/ W]                                                                                                                                          | [Valid=4689 /-] [Invalid=0 /-]                                                                                                                 |       |                              |

| # r7pad2_8: Done the last year to change society: Participated in protest against brand/shop                                                                |                                                                                                                                                |       |                              |
|-------------------------------------------------------------------------------------------------------------------------------------------------------------|------------------------------------------------------------------------------------------------------------------------------------------------|-------|------------------------------|
| Pre-question                                                                                                                                                | During the last 12 months have you performed any of the following in an attempt to change conditions in society. More than one answer possible |       |                              |
| Literal question                                                                                                                                            | Participated in any protest actions against specific brands or shops.                                                                          |       |                              |
| Interviewer's instructions                                                                                                                                  | [Asked if u=4. ]                                                                                                                               |       |                              |
| Notes                                                                                                                                                       | Deltatt i aksjoner i protest mot bestemte varemerker eller forretninger. (Har du i løpet av de siste 12 månedene gjort                         |       |                              |
| Value                                                                                                                                                       | Label                                                                                                                                          | Cases | Percentage                   |
| 0                                                                                                                                                           |                                                                                                                                                | 1160  | <div><div></div></div> 24.7% |
| 1                                                                                                                                                           | Participated in any protest actions against specific brands or shops.                                                                          | 20    | <div><div></div></div> 0.4%  |
| 97                                                                                                                                                          | No answer                                                                                                                                      | 23    | <div><div></div></div> 0.5%  |
| 98                                                                                                                                                          | Not asked                                                                                                                                      | 3486  | <div><div></div></div> 74.3% |
| Warning: these figures indicate the number of cases found in the data file. They cannot be interpreted as summary statistics of the population of interest. |                                                                                                                                                |       |                              |
| # r7pad2_9: Done the last year to change society: Invested in company with a social profile you support                                                     |                                                                                                                                                |       |                              |
| Information                                                                                                                                                 | [Type= discrete] [Format=numeric] [Range= 1-1] [Missing=*]                                                                                     |       |                              |
| Statistics [NW/ W]                                                                                                                                          | [Valid=4689 /-] [Invalid=0 /-]                                                                                                                 |       |                              |
| Pre-question                                                                                                                                                | During the last 12 months have you performed any of the following in an attempt to change conditions in society. More than one answer possible |       |                              |
| Literal question                                                                                                                                            | Made investments in companies that have a social profile that you support.                                                                     |       |                              |
| Interviewer's instructions                                                                                                                                  | [Asked if u=4. ]                                                                                                                               |       |                              |
| Notes                                                                                                                                                       | Investert i selskaper som har en sosial profil som du støtter. (Har du i løpet av de siste 12 månedene gjort noe av de                         |       |                              |
| Value                                                                                                                                                       | Label                                                                                                                                          | Cases | Percentage                   |
| 0                                                                                                                                                           |                                                                                                                                                | 1129  | <div><div></div></div> 24.1% |
| 1                                                                                                                                                           | Made investments in companies that have a social profile that you support.                                                                     | 51    | <div><div></div></div> 1.1%  |
| 97                                                                                                                                                          | No answer                                                                                                                                      | 23    | <div><div></div></div> 0.5%  |
| 98                                                                                                                                                          | Not asked                                                                                                                                      | 3486  | <div><div></div></div> 74.3% |
| Warning: these figures indicate the number of cases found in the data file. They cannot be interpreted as summary statistics of the population of interest. |                                                                                                                                                |       |                              |
| # r7pad3_1: Statement: Politicians unable to do anything about problems in society, everyone must do their bit                                              |                                                                                                                                                |       |                              |
| Information                                                                                                                                                 | [Type= discrete] [Format=numeric] [Range= 1-7] [Missing=*]                                                                                     |       |                              |
| Statistics [NW/ W]                                                                                                                                          | [Valid=4689 /-] [Invalid=0 /-]                                                                                                                 |       |                              |
| Pre-question                                                                                                                                                | To what extent do you agree or disagree with the following statements?                                                                         |       |                              |
| Literal question                                                                                                                                            | As politicians are unable to do anything about the problems in society, everyone must do their bit.                                            |       |                              |
| Interviewer's instructions                                                                                                                                  | [Asked if u=4. ]                                                                                                                               |       |                              |
| Notes                                                                                                                                                       | Siden politikerne ikke er i stand til å gjøre noe med samfunnsproblemene, må hver enkelt gjøre sitt. (I hvilken grad                           |       |                              |
| Value                                                                                                                                                       | Label                                                                                                                                          | Cases | Percentage                   |
| 1                                                                                                                                                           | Strongly agree                                                                                                                                 | 33    | <div><div></div></div> 0.7%  |
| 2                                                                                                                                                           | Agree                                                                                                                                          | 193   | <div><div></div></div> 4.1%  |
| 3                                                                                                                                                           | Somewhat agree                                                                                                                                 | 363   | <div><div></div></div> 7.7%  |
| 4                                                                                                                                                           | Neither agree nor disagree                                                                                                                     | 242   | <div><div></div></div> 5.2%  |
| 5                                                                                                                                                           | Somewhat disagree                                                                                                                              | 111   | <div><div></div></div> 2.4%  |
| 6                                                                                                                                                           | Disagree                                                                                                                                       | 179   | <div><div></div></div> 3.8%  |
| 7                                                                                                                                                           | Strongly disagree                                                                                                                              | 39    | <div><div></div></div> 0.8%  |
| 97                                                                                                                                                          | No answer                                                                                                                                      | 43    | <div><div></div></div> 0.9%  |
| 98                                                                                                                                                          | Not asked                                                                                                                                      | 3486  | <div><div></div></div> 74.3% |
| Warning: these figures indicate the number of cases found in the data file. They cannot be interpreted as summary statistics of the population of interest. |                                                                                                                                                |       |                              |

| # r7pad3_2: Statement: Politicians' responsibility to ensure that our society is sustainable                                                                |                                                                                                                        |       |            |
|-------------------------------------------------------------------------------------------------------------------------------------------------------------|------------------------------------------------------------------------------------------------------------------------|-------|------------|
| Information                                                                                                                                                 | [Type= discrete] [Format=numeric] [Range= 1-7] [Missing=*]                                                             |       |            |
| Statistics [NW/ W]                                                                                                                                          | [Valid=4689 /-] [Invalid=0 /-]                                                                                         |       |            |
| Pre-question                                                                                                                                                | To what extent do you agree or disagree with the following statements?                                                 |       |            |
| Literal question                                                                                                                                            | It is the politicians' responsibility, not individuals', to ensure that our society is sustainable.                    |       |            |
| Interviewer's instructions                                                                                                                                  | [Asked if u=4. ]                                                                                                       |       |            |
| Notes                                                                                                                                                       | Det er politikerne og ikke enkeltindivers ansvar at samfunnet vi lever i er bærekraftig. (I hvilken grad er du enig el |       |            |
| Value                                                                                                                                                       | Label                                                                                                                  | Cases | Percentage |
| 1                                                                                                                                                           | Strongly agree                                                                                                         | 31    | 0.7%       |
| 2                                                                                                                                                           | Agree                                                                                                                  | 124   | 2.6%       |
| 3                                                                                                                                                           | Somewhat agree                                                                                                         | 244   | 5.2%       |
| 4                                                                                                                                                           | Neither agree nor disagree                                                                                             | 154   | 3.3%       |
| 5                                                                                                                                                           | Somewhat disagree                                                                                                      | 290   | 6.2%       |
| 6                                                                                                                                                           | Disagree                                                                                                               | 260   | 5.5%       |
| 7                                                                                                                                                           | Strongly disagree                                                                                                      | 58    | 1.2%       |
| 97                                                                                                                                                          | No answer                                                                                                              | 42    | 0.9%       |
| 98                                                                                                                                                          | Not asked                                                                                                              | 3486  | 74.3%      |
| Warning: these figures indicate the number of cases found in the data file. They cannot be interpreted as summary statistics of the population of interest. |                                                                                                                        |       |            |

| # r7pad3_3: Statement: Conscious decisions in our daily life can alter social development                                                                   |                                                                                                                          |       |             |       |
|-------------------------------------------------------------------------------------------------------------------------------------------------------------|--------------------------------------------------------------------------------------------------------------------------|-------|-------------|-------|
| Information                                                                                                                                                 | [Type= discrete] [Format=numeric] [Range= 1-7] [Missing=*]                                                               |       |             |       |
| Statistics [NW/ W]                                                                                                                                          | [Valid=4689 /-] [Invalid=0 /-]                                                                                           |       |             |       |
| Pre-question                                                                                                                                                | To what extent do you agree or disagree with the following statements?                                                   |       |             |       |
| Literal question                                                                                                                                            | By making conscious decisions in our daily life, it is possible to alter social development.                             |       |             |       |
| Interviewer's instructions                                                                                                                                  | [Asked if u=4. ]                                                                                                         |       |             |       |
| Notes                                                                                                                                                       | Ved at hver enkelt tar bevisste valg i hverdagen, er det mulig å endre samfunnsutviklingen. (I hvilken grad er du enig e |       |             |       |
| Value                                                                                                                                                       | Label                                                                                                                    | Cases | Percentage  |       |
| 1                                                                                                                                                           | Strongly agree                                                                                                           | 120   | <div></div> | 2.6%  |
| 2                                                                                                                                                           | Agree                                                                                                                    | 521   | <div></div> | 11.1% |
| 3                                                                                                                                                           | Somewhat agree                                                                                                           | 366   | <div></div> | 7.8%  |
| 4                                                                                                                                                           | Neither agree nor disagree                                                                                               | 93    | <div></div> | 2.0%  |
| 5                                                                                                                                                           | Somewhat disagree                                                                                                        | 39    | <div></div> | 0.8%  |
| 6                                                                                                                                                           | Disagree                                                                                                                 | 14    | <div></div> | 0.3%  |
| 7                                                                                                                                                           | Strongly disagree                                                                                                        | 9     | <div></div> | 0.2%  |
| 97                                                                                                                                                          | No answer                                                                                                                | 41    | <div></div> | 0.9%  |
| 98                                                                                                                                                          | Not asked                                                                                                                | 3486  | <div></div> | 74.3% |
| Warning: these figures indicate the number of cases found in the data file. They cannot be interpreted as summary statistics of the population of interest. |                                                                                                                          |       |             |       |
| # r7pad3_4: Statement: Naive to believe major global challenges for society can be solved by single individuals' life choices                               |                                                                                                                          |       |             |       |
| Information                                                                                                                                                 | [Type= discrete] [Format=numeric] [Range= 1-7] [Missing=*]                                                               |       |             |       |
| Statistics [NW/ W]                                                                                                                                          | [Valid=4689 /-] [Invalid=0 /-]                                                                                           |       |             |       |
| Pre-question                                                                                                                                                | To what extent do you agree or disagree with the following statements?                                                   |       |             |       |
| Literal question                                                                                                                                            | It is naive to believe that major global challenges for society can be solved by single individuals' life choices.       |       |             |       |
| Interviewer's instructions                                                                                                                                  | [Asked if u=4. ]                                                                                                         |       |             |       |
| Notes                                                                                                                                                       | Det er naivt å tro at store, globale samfunnsutfordringer kan løses gjennom enkeltindividers livsstilsvalg. (I hvilken   |       |             |       |
| Value                                                                                                                                                       | Label                                                                                                                    | Cases | Percentage  |       |
| 1                                                                                                                                                           | Strongly agree                                                                                                           | 52    | <div></div> | 1.1%  |
| 2                                                                                                                                                           | Agree                                                                                                                    | 175   | <div></div> | 3.7%  |
| 3                                                                                                                                                           | Somewhat agree                                                                                                           | 258   | <div></div> | 5.5%  |
| 4                                                                                                                                                           | Neither agree nor disagree                                                                                               | 153   | <div></div> | 3.3%  |
| 5                                                                                                                                                           | Somewhat disagree                                                                                                        | 272   | <div></div> | 5.8%  |
| 6                                                                                                                                                           | Disagree                                                                                                                 | 194   | <div></div> | 4.1%  |
| 7                                                                                                                                                           | Strongly disagree                                                                                                        | 50    | <div></div> | 1.1%  |
| 97                                                                                                                                                          | No answer                                                                                                                | 49    | <div></div> | 1.0%  |
| 98                                                                                                                                                          | Not asked                                                                                                                | 3486  | <div></div> | 74.3% |
| Warning: these figures indicate the number of cases found in the data file. They cannot be interpreted as summary statistics of the population of interest. |                                                                                                                          |       |             |       |
| # r7ran8: [Randomizes if u=4. ]                                                                                                                             |                                                                                                                          |       |             |       |
| Information                                                                                                                                                 | [Type= discrete] [Format=numeric] [Range= 1-5] [Missing=*]                                                               |       |             |       |
| Statistics [NW/ W]                                                                                                                                          | [Valid=1176 /-] [Invalid=3513 /-]                                                                                        |       |             |       |
| Interviewer's instructions                                                                                                                                  | [Randomizes if u=4. ]                                                                                                    |       |             |       |
| Value                                                                                                                                                       | Label                                                                                                                    | Cases | Percentage  |       |
| 1                                                                                                                                                           | 1                                                                                                                        | 232   | <div></div> | 19.7% |
| 2                                                                                                                                                           | 2                                                                                                                        | 241   | <div></div> | 20.5% |

| # r7ran8: [Randomizes if u=4. ]                                                                                                                             |                                                                                                                                             |       |                              |
|-------------------------------------------------------------------------------------------------------------------------------------------------------------|---------------------------------------------------------------------------------------------------------------------------------------------|-------|------------------------------|
| Value                                                                                                                                                       | Label                                                                                                                                       | Cases | Percentage                   |
| 3                                                                                                                                                           | 3                                                                                                                                           | 239   | <div><div></div></div> 20.3% |
| 4                                                                                                                                                           | 4                                                                                                                                           | 240   | <div><div></div></div> 20.4% |
| 5                                                                                                                                                           | 5                                                                                                                                           | 224   | <div><div></div></div> 19.0% |
| Sysmiss                                                                                                                                                     |                                                                                                                                             | 3513  |                              |
| Warning: these figures indicate the number of cases found in the data file. They cannot be interpreted as summary statistics of the population of interest. |                                                                                                                                             |       |                              |
| # r7dvex2_1: Should party be banned: Abolish all production of oil                                                                                          |                                                                                                                                             |       |                              |
| Information                                                                                                                                                 | [Type= discrete] [Format=numeric] [Range= 1-2] [Missing=*]                                                                                  |       |                              |
| Statistics [NW/ W]                                                                                                                                          | [Valid=4689 /-] [Invalid=0 /-]                                                                                                              |       |                              |
| Pre-question                                                                                                                                                | Imagine that a political party desires to change Norway in a radical way by abolishing all the production of oil along the Norwegian coast. |       |                              |
| Literal question                                                                                                                                            | In your opinion, should such a party be banned?                                                                                             |       |                              |
| Interviewer's instructions                                                                                                                                  | [Asked if u=4 and ran8=1. ]                                                                                                                 |       |                              |
| Notes                                                                                                                                                       | Forestill deg at et politisk parti ønsker å endre Norge radikalt ved å avskaffe all oljeproduksjon ved norskekysten.SI                      |       |                              |
| Value                                                                                                                                                       | Label                                                                                                                                       | Cases | Percentage                   |
| 1                                                                                                                                                           | Yes                                                                                                                                         | 51    | <div><div></div></div> 1.1%  |
| 2                                                                                                                                                           | No                                                                                                                                          | 176   | <div><div></div></div> 3.8%  |
| 97                                                                                                                                                          | No answer                                                                                                                                   | 5     | <div><div></div></div> 0.1%  |
| 98                                                                                                                                                          | Not asked                                                                                                                                   | 4457  | <div><div></div></div> 95.1% |
| Warning: these figures indicate the number of cases found in the data file. They cannot be interpreted as summary statistics of the population of interest. |                                                                                                                                             |       |                              |
| # r7dvex2_2: Should party be banned: Abolish free and fair elections                                                                                        |                                                                                                                                             |       |                              |
| Information                                                                                                                                                 | [Type= discrete] [Format=numeric] [Range= 1-2] [Missing=*]                                                                                  |       |                              |
| Statistics [NW/ W]                                                                                                                                          | [Valid=4689 /-] [Invalid=0 /-]                                                                                                              |       |                              |
| Pre-question                                                                                                                                                | Imagine that a political party desires to change Norway in a radical way by abolishing free and fair elections.                             |       |                              |
| Literal question                                                                                                                                            | In your opinion, should such a party be banned?                                                                                             |       |                              |
| Interviewer's instructions                                                                                                                                  | [Asked if u=4 and ran8=2. ]                                                                                                                 |       |                              |
| Notes                                                                                                                                                       | Forestill deg at et politisk parti ønsker å endre Norge radikalt ved å avskaffe frie og rettferdige valg. Slik du ser                       |       |                              |
| Value                                                                                                                                                       | Label                                                                                                                                       | Cases | Percentage                   |
| 1                                                                                                                                                           | Yes                                                                                                                                         | 175   | <div><div></div></div> 3.7%  |
| 2                                                                                                                                                           | No                                                                                                                                          | 61    | <div><div></div></div> 1.3%  |
| 97                                                                                                                                                          | No answer                                                                                                                                   | 5     | <div><div></div></div> 0.1%  |
| 98                                                                                                                                                          | Not asked                                                                                                                                   | 4448  | <div><div></div></div> 94.9% |
| Warning: these figures indicate the number of cases found in the data file. They cannot be interpreted as summary statistics of the population of interest. |                                                                                                                                             |       |                              |
| # r7dvex2_3: Should party be banned: Abolish freedom of the press                                                                                           |                                                                                                                                             |       |                              |
| Information                                                                                                                                                 | [Type= discrete] [Format=numeric] [Range= 1-2] [Missing=*]                                                                                  |       |                              |
| Statistics [NW/ W]                                                                                                                                          | [Valid=4689 /-] [Invalid=0 /-]                                                                                                              |       |                              |
| Pre-question                                                                                                                                                | Imagine that a political party desires to change Norway in a radical way by abolishing the freedom of the press.                            |       |                              |
| Literal question                                                                                                                                            | In your opinion, should such a party be banned?                                                                                             |       |                              |
| Interviewer's instructions                                                                                                                                  | [Asked if u=4 and ran8=3. ]                                                                                                                 |       |                              |
| Notes                                                                                                                                                       | Forestill deg at et politisk parti ønsker å endre Norge radikalt ved å avskaffe pressefriheten. Slik du ser det, bør                        |       |                              |
| Value                                                                                                                                                       | Label                                                                                                                                       | Cases | Percentage                   |
| 1                                                                                                                                                           | Yes                                                                                                                                         | 160   | <div><div></div></div> 3.4%  |
| 2                                                                                                                                                           | No                                                                                                                                          | 75    | <div><div></div></div> 1.6%  |

| # r7dvex2_3: Should party be banned: Abolish freedom of the press                                                                                           |                                                                                                                                                |       |                   |
|-------------------------------------------------------------------------------------------------------------------------------------------------------------|------------------------------------------------------------------------------------------------------------------------------------------------|-------|-------------------|
| Value                                                                                                                                                       | Label                                                                                                                                          | Cases | Percentage        |
| 97                                                                                                                                                          | No answer                                                                                                                                      | 4     | 0.1%              |
| 98                                                                                                                                                          | Not asked                                                                                                                                      | 4450  | <div></div> 94.9% |
| Warning: these figures indicate the number of cases found in the data file. They cannot be interpreted as summary statistics of the population of interest. |                                                                                                                                                |       |                   |
| # r7dvex2_4: Should party be banned: Abolish endorsement of the Convention on Human Rights                                                                  |                                                                                                                                                |       |                   |
| Information                                                                                                                                                 | [Type= discrete] [Format=numeric] [Range= 1-2] [Missing=*]                                                                                     |       |                   |
| Statistics [NW/ W]                                                                                                                                          | [Valid=4689 /-] [Invalid=0 /-]                                                                                                                 |       |                   |
| Pre-question                                                                                                                                                | Imagine that a political party desires to change Norway in a radical way by abolishing Norway's endorsement of the Convention on Human Rights. |       |                   |
| Literal question                                                                                                                                            | In your opinion, should such a party be banned?                                                                                                |       |                   |
| Interviewer's instructions                                                                                                                                  | [Asked if u=4 and ran8=4. ]                                                                                                                    |       |                   |
| Notes                                                                                                                                                       | Forestill deg at et politisk parti ønsker å endre Norge radikalt ved å avskaffe Norges tilslutning til Menneskerettigh                         |       |                   |
| Value                                                                                                                                                       | Label                                                                                                                                          | Cases | Percentage        |
| 1                                                                                                                                                           | Yes                                                                                                                                            | 122   | <div></div> 2.6%  |
| 2                                                                                                                                                           | No                                                                                                                                             | 110   | <div></div> 2.3%  |
| 97                                                                                                                                                          | No answer                                                                                                                                      | 8     | 0.2%              |
| 98                                                                                                                                                          | Not asked                                                                                                                                      | 4449  | <div></div> 94.9% |
| Warning: these figures indicate the number of cases found in the data file. They cannot be interpreted as summary statistics of the population of interest. |                                                                                                                                                |       |                   |
| # r7dvex2_5: Should party be banned: Abolish the rights of minorities                                                                                       |                                                                                                                                                |       |                   |
| Information                                                                                                                                                 | [Type= discrete] [Format=numeric] [Range= 1-2] [Missing=*]                                                                                     |       |                   |
| Statistics [NW/ W]                                                                                                                                          | [Valid=4689 /-] [Invalid=0 /-]                                                                                                                 |       |                   |
| Pre-question                                                                                                                                                | Imagine that a political party desires to change Norway in a radical way by abolishing the rights of minorities.                               |       |                   |
| Literal question                                                                                                                                            | In your opinion, should such a party be banned?                                                                                                |       |                   |
| Interviewer's instructions                                                                                                                                  | [Asked if u=4 and ran8=5. ]                                                                                                                    |       |                   |
| Notes                                                                                                                                                       | Forestill deg at et politisk parti ønsker å endre Norge radikalt ved å avskaffe minoriteters rettigheter.Slik du ser d                         |       |                   |
| Value                                                                                                                                                       | Label                                                                                                                                          | Cases | Percentage        |
| 1                                                                                                                                                           | Yes                                                                                                                                            | 120   | <div></div> 2.6%  |
| 2                                                                                                                                                           | No                                                                                                                                             | 101   | <div></div> 2.2%  |
| 97                                                                                                                                                          | No answer                                                                                                                                      | 3     | 0.1%              |
| 98                                                                                                                                                          | Not asked                                                                                                                                      | 4465  | <div></div> 95.2% |
| Warning: these figures indicate the number of cases found in the data file. They cannot be interpreted as summary statistics of the population of interest. |                                                                                                                                                |       |                   |
| # r7ran9: [Randomizes if u=4. ]                                                                                                                             |                                                                                                                                                |       |                   |
| Information                                                                                                                                                 | [Type= discrete] [Format=numeric] [Range= 1-4] [Missing=*]                                                                                     |       |                   |
| Statistics [NW/ W]                                                                                                                                          | [Valid=1176 /-] [Invalid=3513 /-]                                                                                                              |       |                   |
| Interviewer's instructions                                                                                                                                  | [Randomizes if u=4. ]                                                                                                                          |       |                   |
| Value                                                                                                                                                       | Label                                                                                                                                          | Cases | Percentage        |
| 1                                                                                                                                                           | 1                                                                                                                                              | 282   | <div></div> 24.0% |
| 2                                                                                                                                                           | 2                                                                                                                                              | 302   | <div></div> 25.7% |
| 3                                                                                                                                                           | 3                                                                                                                                              | 313   | <div></div> 26.6% |
| 4                                                                                                                                                           | 4                                                                                                                                              | 279   | <div></div> 23.7% |
| Sysmiss                                                                                                                                                     |                                                                                                                                                | 3513  |                   |
| Warning: these figures indicate the number of cases found in the data file. They cannot be interpreted as summary statistics of the population of interest. |                                                                                                                                                |       |                   |



### # r7dvg\_1: Statement: Believable that those who state sexual orientation as reason they are seeking asylum are telling the truth

|                                   |                                                                                                                                                                                    |
|-----------------------------------|------------------------------------------------------------------------------------------------------------------------------------------------------------------------------------|
| <b>Information</b>                | [Type= discrete] [Format=numeric] [Range= 1-7] [Missing=*]                                                                                                                         |
| <b>Statistics [NW/ W]</b>         | [Valid=4689 /-] [Invalid=0 /-]                                                                                                                                                     |
| <b>Pre-question</b>               | To what extent do you agree or disagree with the following statement:                                                                                                              |
| <b>Literal question</b>           | There is reason to believe that most of those who state sexual orientation as the reason they have left their home country and are seeking asylum in Norway are telling the truth. |
| <b>Interviewer's instructions</b> | [Asked if u=4 and ran9=1. ]                                                                                                                                                        |
| <b>Notes</b>                      | Hvor enig eller uenig er du i følgende påstand: Det er grunn til å tro at de fleste snakker sant når de oppgir seksue                                                              |

| Value | Label                      | Cases | Percentage |
|-------|----------------------------|-------|------------|
| 1     | Strongly agree             | 7     | 0.1%       |
| 2     | Agree                      | 39    | 0.8%       |
| 3     | Somewhat agree             | 52    | 1.1%       |
| 4     | Neither agree nor disagree | 104   | 2.2%       |
| 5     | Somewhat disagree          | 33    | 0.7%       |
| 6     | Disagree                   | 31    | 0.7%       |
| 7     | Strongly disagree          | 13    | 0.3%       |
| 97    | No answer                  | 3     | 0.1%       |
| 98    | Not asked                  | 4407  | 94.0%      |

Warning: these figures indicate the number of cases found in the data file. They cannot be interpreted as summary statistics of the population of interest.

### # r7dvg\_2: Statement: Believable that the reason to seek asylum is true

|                                   |                                                                                                                                                              |
|-----------------------------------|--------------------------------------------------------------------------------------------------------------------------------------------------------------|
| <b>Information</b>                | [Type= discrete] [Format=numeric] [Range= 1-7] [Missing=*]                                                                                                   |
| <b>Statistics [NW/ W]</b>         | [Valid=4689 /-] [Invalid=0 /-]                                                                                                                               |
| <b>Pre-question</b>               | To what extent do you agree or disagree with the following statement:                                                                                        |
| <b>Literal question</b>           | There is reason to believe that most of those who state the reason they have left their home country and are seeking asylum in Norway are telling the truth. |
| <b>Interviewer's instructions</b> | [Asked if u=4 and ran9=2. ]                                                                                                                                  |
| <b>Notes</b>                      | Hvor enig eller uenig er du i følgende påstand: Det er grunn til å tro at de fleste snakker sant om årsaken til at de                                        |

| Value | Label                      | Cases | Percentage |
|-------|----------------------------|-------|------------|
| 1     | Strongly agree             | 8     | 0.2%       |
| 2     | Agree                      | 68    | 1.5%       |
| 3     | Somewhat agree             | 74    | 1.6%       |
| 4     | Neither agree nor disagree | 48    | 1.0%       |
| 5     | Somewhat disagree          | 59    | 1.3%       |
| 6     | Disagree                   | 29    | 0.6%       |
| 7     | Strongly disagree          | 13    | 0.3%       |
| 97    | No answer                  | 3     | 0.1%       |
| 98    | Not asked                  | 4387  | 93.6%      |

Warning: these figures indicate the number of cases found in the data file. They cannot be interpreted as summary statistics of the population of interest.

### # r7dvg\_3: Statement: Believable that those who state conversion to new religion as reason they are seeking asylum are telling the truth

|                           |                                                                       |
|---------------------------|-----------------------------------------------------------------------|
| <b>Information</b>        | [Type= discrete] [Format=numeric] [Range= 1-7] [Missing=*]            |
| <b>Statistics [NW/ W]</b> | [Valid=4689 /-] [Invalid=0 /-]                                        |
| <b>Pre-question</b>       | To what extent do you agree or disagree with the following statement: |

**# r7dvg\_3: Statement: Believable that those who state conversion to new religion as reason they are seeking asylum are telling the truth**

|                                   |                                                                                                                                                                                              |
|-----------------------------------|----------------------------------------------------------------------------------------------------------------------------------------------------------------------------------------------|
| <b>Literal question</b>           | There is reason to believe that most of those who state conversion to a new religion as the reason they have left their home country and are seeking asylum in Norway are telling the truth. |
| <b>Interviewer's instructions</b> | [Asked if u=4 and ran9=3. ]                                                                                                                                                                  |
| <b>Notes</b>                      | Hvor enig eller uenig er du i følgende påstand: Det er grunn til å tro at de fleste snakker sant når de oppgir konver                                                                        |

| Value | Label                      | Cases | Percentage |
|-------|----------------------------|-------|------------|
| 1     | Strongly agree             | 3     | 0.1%       |
| 2     | Agree                      | 27    | 0.6%       |
| 3     | Somewhat agree             | 52    | 1.1%       |
| 4     | Neither agree nor disagree | 106   | 2.3%       |
| 5     | Somewhat disagree          | 50    | 1.1%       |
| 6     | Disagree                   | 56    | 1.2%       |
| 7     | Strongly disagree          | 16    | 0.3%       |
| 97    | No answer                  | 3     | 0.1%       |
| 98    | Not asked                  | 4376  | 93.3%      |

*Warning: these figures indicate the number of cases found in the data file. They cannot be interpreted as summary statistics of the population of interest.*

**# r7dvg\_4: Statement: Believable that the asylum seekers who state that they are minors are telling the truth**

|                                   |                                                                                                                                   |
|-----------------------------------|-----------------------------------------------------------------------------------------------------------------------------------|
| <b>Information</b>                | [Type= discrete] [Format=numeric] [Range= 1-7] [Missing=*]                                                                        |
| <b>Statistics [NW/ W]</b>         | [Valid=4689 /-] [Invalid=0 /-]                                                                                                    |
| <b>Pre-question</b>               | To what extent do you agree or disagree with the following statement:                                                             |
| <b>Literal question</b>           | There is reason to believe that most of those who state that they are minors when seeking asylum in Norway are telling the truth. |
| <b>Interviewer's instructions</b> | [Asked if u=4 and ran9=4. ]                                                                                                       |
| <b>Notes</b>                      | Hvor enig eller uenig er du i følgende påstand: Det er grunn til å tro at de fleste snakker sant når de oppgir at de              |

| Value | Label                      | Cases | Percentage |
|-------|----------------------------|-------|------------|
| 1     | Strongly agree             | 4     | 0.1%       |
| 2     | Agree                      | 36    | 0.8%       |
| 3     | Somewhat agree             | 44    | 0.9%       |
| 4     | Neither agree nor disagree | 69    | 1.5%       |
| 5     | Somewhat disagree          | 65    | 1.4%       |
| 6     | Disagree                   | 36    | 0.8%       |
| 7     | Strongly disagree          | 23    | 0.5%       |
| 97    | No answer                  | 2     | 0.0%       |
| 98    | Not asked                  | 4410  | 94.0%      |

*Warning: these figures indicate the number of cases found in the data file. They cannot be interpreted as summary statistics of the population of interest.*

**# r7ran10: [Randomizes if u=4. ]**

|                                   |                                                            |
|-----------------------------------|------------------------------------------------------------|
| <b>Information</b>                | [Type= discrete] [Format=numeric] [Range= 1-7] [Missing=*] |
| <b>Statistics [NW/ W]</b>         | [Valid=1175 /-] [Invalid=3514 /-]                          |
| <b>Interviewer's instructions</b> | [Randomizes if u=4. ]                                      |

| Value | Label | Cases | Percentage |
|-------|-------|-------|------------|
| 1     | 1     | 182   | 15.5%      |
| 2     | 2     | 164   | 14.0%      |
| 3     | 3     | 170   | 14.5%      |
| 4     | 4     | 160   | 13.6%      |

| # r7ran10: [Randomizes if u=4. ]                                                                                                                            |                                                                                                                          |       |            |
|-------------------------------------------------------------------------------------------------------------------------------------------------------------|--------------------------------------------------------------------------------------------------------------------------|-------|------------|
| Value                                                                                                                                                       | Label                                                                                                                    | Cases | Percentage |
| 5                                                                                                                                                           | 5                                                                                                                        | 184   | 15.7%      |
| 6                                                                                                                                                           | 6                                                                                                                        | 166   | 14.1%      |
| 7                                                                                                                                                           | 7                                                                                                                        | 149   | 12.7%      |
| Sysmiss                                                                                                                                                     |                                                                                                                          | 3514  |            |
| Warning: these figures indicate the number of cases found in the data file. They cannot be interpreted as summary statistics of the population of interest. |                                                                                                                          |       |            |
| # r7dvkost1: How large cost/benefit is immigration to the welfare state?                                                                                    |                                                                                                                          |       |            |
| Information                                                                                                                                                 | [Type= discrete] [Format=numeric] [Range= 1-7] [Missing=*]                                                               |       |            |
| Statistics [NW/ W]                                                                                                                                          | [Valid=4689 /-] [Invalid=0 /-]                                                                                           |       |            |
| Literal question                                                                                                                                            | How large would you say the cost or benefit of immigration is to the Norwegian welfare state?                            |       |            |
| Interviewer's instructions                                                                                                                                  | [Asked if u=4 and ran10=1. ]                                                                                             |       |            |
| Notes                                                                                                                                                       | Hvor stor kostnad eller gevinst vil du si at innvandring er for den norske velferdsstaten?                               |       |            |
| Value                                                                                                                                                       | Label                                                                                                                    | Cases | Percentage |
| 1                                                                                                                                                           | Very large cost                                                                                                          | 15    | 0.3%       |
| 2                                                                                                                                                           | Large cost                                                                                                               | 42    | 0.9%       |
| 3                                                                                                                                                           | A certain cost                                                                                                           | 54    | 1.2%       |
| 4                                                                                                                                                           | Neither cost nor benefit                                                                                                 | 13    | 0.3%       |
| 5                                                                                                                                                           | A certain benefit                                                                                                        | 42    | 0.9%       |
| 6                                                                                                                                                           | Great benefit                                                                                                            | 14    | 0.3%       |
| 7                                                                                                                                                           | Very great benefit                                                                                                       | 0     |            |
| 97                                                                                                                                                          | No answer                                                                                                                | 2     | 0.0%       |
| 98                                                                                                                                                          | Not asked                                                                                                                | 4507  | 96.1%      |
| Warning: these figures indicate the number of cases found in the data file. They cannot be interpreted as summary statistics of the population of interest. |                                                                                                                          |       |            |
| # r7dvkost2: How large cost/benefit is immigration to the welfare state? Unemployment rate 7%                                                               |                                                                                                                          |       |            |
| Information                                                                                                                                                 | [Type= discrete] [Format=numeric] [Range= 1-7] [Missing=*]                                                               |       |            |
| Statistics [NW/ W]                                                                                                                                          | [Valid=4689 /-] [Invalid=0 /-]                                                                                           |       |            |
| Pre-question                                                                                                                                                | You may well be aware that the unemployment rate for immigrants in Norway is around 7%.                                  |       |            |
| Literal question                                                                                                                                            | Taking this into account, how large would you say the cost or benefit of immigration is to the Norwegian welfare state?  |       |            |
| Interviewer's instructions                                                                                                                                  | [Asked if u=4 and ran10=2. ]                                                                                             |       |            |
| Notes                                                                                                                                                       | Som du kanskje vet ligger arbeidsledigheten blant innvandrere i Norge på rundt 7%. Hvis du tar dette i betraktning, hvor |       |            |
| Value                                                                                                                                                       | Label                                                                                                                    | Cases | Percentage |
| 1                                                                                                                                                           | Very large cost                                                                                                          | 22    | 0.5%       |
| 2                                                                                                                                                           | Large cost                                                                                                               | 30    | 0.6%       |
| 3                                                                                                                                                           | A certain cost                                                                                                           | 48    | 1.0%       |
| 4                                                                                                                                                           | Neither cost nor benefit                                                                                                 | 21    | 0.4%       |
| 5                                                                                                                                                           | A certain benefit                                                                                                        | 32    | 0.7%       |
| 6                                                                                                                                                           | Great benefit                                                                                                            | 8     | 0.2%       |
| 7                                                                                                                                                           | Very great benefit                                                                                                       | 1     | 0.0%       |
| 97                                                                                                                                                          | No answer                                                                                                                | 2     | 0.0%       |
| 98                                                                                                                                                          | Not asked                                                                                                                | 4525  | 96.5%      |
| Warning: these figures indicate the number of cases found in the data file. They cannot be interpreted as summary statistics of the population of interest. |                                                                                                                          |       |            |
| # r7dvkost3: How large cost/benefit is immigration to the welfare state? Employment rate 60%                                                                |                                                                                                                          |       |            |
| Information                                                                                                                                                 | [Type= discrete] [Format=numeric] [Range= 1-7] [Missing=*]                                                               |       |            |

| # r7dvmkost3: How large cost/benefit is immigration to the welfare state? Employment rate 60%                                                               |                                                                                                                              |       |            |
|-------------------------------------------------------------------------------------------------------------------------------------------------------------|------------------------------------------------------------------------------------------------------------------------------|-------|------------|
| Statistics [NW/ W]                                                                                                                                          | [Valid=4689 /-] [Invalid=0 /-]                                                                                               |       |            |
| Pre-question                                                                                                                                                | You may well be aware that the employment rate for immigrants in Norway is around 60%.                                       |       |            |
| Literal question                                                                                                                                            | Taking this into account, how large would you say the cost or benefit of immigration is to the Norwegian welfare state?      |       |            |
| Interviewer's instructions                                                                                                                                  | [Asked if u=4 and ran10=3. ]                                                                                                 |       |            |
| Notes                                                                                                                                                       | Som du kanskje vet ligger sysselsettingen blant innvandrere i Norge på rundt 60%. Hvis du tar det i betraktning, hvor st     |       |            |
| Value                                                                                                                                                       | Label                                                                                                                        | Cases | Percentage |
| 1                                                                                                                                                           | Very large cost                                                                                                              | 15    | 0.3%       |
| 2                                                                                                                                                           | Large cost                                                                                                                   | 45    | 1.0%       |
| 3                                                                                                                                                           | A certain cost                                                                                                               | 58    | 1.2%       |
| 4                                                                                                                                                           | Neither cost nor benefit                                                                                                     | 8     | 0.2%       |
| 5                                                                                                                                                           | A certain benefit                                                                                                            | 30    | 0.6%       |
| 6                                                                                                                                                           | Great benefit                                                                                                                | 6     | 0.1%       |
| 7                                                                                                                                                           | Very great benefit                                                                                                           | 0     |            |
| 97                                                                                                                                                          | No answer                                                                                                                    | 8     | 0.2%       |
| 98                                                                                                                                                          | Not asked                                                                                                                    | 4519  | 96.4%      |
| Warning: these figures indicate the number of cases found in the data file. They cannot be interpreted as summary statistics of the population of interest. |                                                                                                                              |       |            |
| # r7dvmkost4: How large cost/benefit is immigration to the welfare state? Expense                                                                           |                                                                                                                              |       |            |
| Information                                                                                                                                                 | [Type= discrete] [Format=numeric] [Range= 1-7] [Missing=*]                                                                   |       |            |
| Statistics [NW/ W]                                                                                                                                          | [Valid=4689 /-] [Invalid=0 /-]                                                                                               |       |            |
| Pre-question                                                                                                                                                | You may well be aware that the unemployment rate for immigrants means a significant expense for the Norwegian welfare state. |       |            |
| Literal question                                                                                                                                            | Taking this into account, how large would you say the cost or benefit of immigration is to the Norwegian welfare state?      |       |            |
| Interviewer's instructions                                                                                                                                  | [Asked if u=4 and ran10=4. ]                                                                                                 |       |            |
| Notes                                                                                                                                                       | Som du kanskje vet fører arbeidsledighet blant innvandrere til en betydelig utgift for den norske velferdsstaten. Hvis d     |       |            |
| Value                                                                                                                                                       | Label                                                                                                                        | Cases | Percentage |
| 1                                                                                                                                                           | Very large cost                                                                                                              | 18    | 0.4%       |
| 2                                                                                                                                                           | Large cost                                                                                                                   | 50    | 1.1%       |
| 3                                                                                                                                                           | A certain cost                                                                                                               | 55    | 1.2%       |
| 4                                                                                                                                                           | Neither cost nor benefit                                                                                                     | 8     | 0.2%       |
| 5                                                                                                                                                           | A certain benefit                                                                                                            | 19    | 0.4%       |
| 6                                                                                                                                                           | Great benefit                                                                                                                | 5     | 0.1%       |
| 7                                                                                                                                                           | Very great benefit                                                                                                           | 1     | 0.0%       |
| 97                                                                                                                                                          | No answer                                                                                                                    | 4     | 0.1%       |
| 98                                                                                                                                                          | Not asked                                                                                                                    | 4529  | 96.6%      |
| Warning: these figures indicate the number of cases found in the data file. They cannot be interpreted as summary statistics of the population of interest. |                                                                                                                              |       |            |
| # r7dvmkost5: How large cost/benefit is immigration to the welfare state? Income                                                                            |                                                                                                                              |       |            |
| Information                                                                                                                                                 | [Type= discrete] [Format=numeric] [Range= 1-7] [Missing=*]                                                                   |       |            |
| Statistics [NW/ W]                                                                                                                                          | [Valid=4689 /-] [Invalid=0 /-]                                                                                               |       |            |
| Pre-question                                                                                                                                                | You may well be aware that the employment rate of immigrants means a significant income for the Norwegian welfare state.     |       |            |
| Literal question                                                                                                                                            | Taking this into account, how large would you say the cost or benefit of immigration is to the Norwegian welfare state?      |       |            |
| Interviewer's instructions                                                                                                                                  | [Asked if u=4 and ran10=5. ]                                                                                                 |       |            |
| Notes                                                                                                                                                       | Som du kanskje vet fører sysselsettingen av innvandrere i Norge til en betydelig inntekt for den norske velferdsstaten.      |       |            |

### # r7dvcost5: How large cost/benefit is immigration to the welfare state? Income

| Value | Label                    | Cases | Percentage |
|-------|--------------------------|-------|------------|
| 1     | Very large cost          | 15    | 0.3%       |
| 2     | Large cost               | 25    | 0.5%       |
| 3     | A certain cost           | 46    | 1.0%       |
| 4     | Neither cost nor benefit | 33    | 0.7%       |
| 5     | A certain benefit        | 43    | 0.9%       |
| 6     | Great benefit            | 11    | 0.2%       |
| 7     | Very great benefit       | 2     | 0.0%       |
| 97    | No answer                | 9     | 0.2%       |
| 98    | Not asked                | 4505  | 96.1%      |

Warning: these figures indicate the number of cases found in the data file. They cannot be interpreted as summary statistics of the population of interest.

### # r7dvcost6: How large cost/benefit is immigration to the welfare state? Unemployment rate 7%, expense

|                                   |                                                                                                                                                           |
|-----------------------------------|-----------------------------------------------------------------------------------------------------------------------------------------------------------|
| <b>Information</b>                | [Type= discrete] [Format=numeric] [Range= 1-7] [Missing=*]                                                                                                |
| <b>Statistics [NW/ W]</b>         | [Valid=4689 /-] [Invalid=0 /-]                                                                                                                            |
| <b>Pre-question</b>               | You may well be aware that the unemployment rate for immigrants in Norway is around 7%. This means a significant expense for the Norwegian welfare state. |
| <b>Literal question</b>           | Taking this into account, how large would you say the cost or benefit of immigration is to the Norwegian welfare state?                                   |
| <b>Interviewer's instructions</b> | [Asked if u=4 and ran10=6. ]                                                                                                                              |
| <b>Notes</b>                      | Som du kanskje vet ligger arbeidsledigheten blant innvandrere i Norge på rundt 7%. Dette fører til en betydelig utgift                                    |

| Value | Label                    | Cases | Percentage |
|-------|--------------------------|-------|------------|
| 1     | Very large cost          | 14    | 0.3%       |
| 2     | Large cost               | 38    | 0.8%       |
| 3     | A certain cost           | 56    | 1.2%       |
| 4     | Neither cost nor benefit | 20    | 0.4%       |
| 5     | A certain benefit        | 28    | 0.6%       |
| 6     | Great benefit            | 6     | 0.1%       |
| 7     | Very great benefit       | 1     | 0.0%       |
| 97    | No answer                | 3     | 0.1%       |
| 98    | Not asked                | 4523  | 96.5%      |

Warning: these figures indicate the number of cases found in the data file. They cannot be interpreted as summary statistics of the population of interest.

### # r7dvcost7: How large cost/benefit is immigration to the welfare state? Employment rate 60%, income

|                                   |                                                                                                                                                         |
|-----------------------------------|---------------------------------------------------------------------------------------------------------------------------------------------------------|
| <b>Information</b>                | [Type= discrete] [Format=numeric] [Range= 1-7] [Missing=*]                                                                                              |
| <b>Statistics [NW/ W]</b>         | [Valid=4689 /-] [Invalid=0 /-]                                                                                                                          |
| <b>Pre-question</b>               | You may well be aware that the employment rate for immigrants in Norway is around 60%. This means a significant income for the Norwegian welfare state. |
| <b>Literal question</b>           | Taking this into account, how large would you say the cost or benefit of immigration is to the Norwegian welfare state?                                 |
| <b>Interviewer's instructions</b> | [Asked if u=4 and ran10=7. ]                                                                                                                            |
| <b>Notes</b>                      | Som du kanskje vet ligger sysselsettingen blant innvandrere i Norge på rundt 60%. Dette fører til en betydelig inntekt                                  |

| Value | Label                    | Cases | Percentage |
|-------|--------------------------|-------|------------|
| 1     | Very large cost          | 13    | 0.3%       |
| 2     | Large cost               | 27    | 0.6%       |
| 3     | A certain cost           | 53    | 1.1%       |
| 4     | Neither cost nor benefit | 8     | 0.2%       |
| 5     | A certain benefit        | 30    | 0.6%       |

| # r7dvkost7: How large cost/benefit is immigration to the welfare state? Employment rate 60%, income                                                        |                                                                                                                        |       |            |
|-------------------------------------------------------------------------------------------------------------------------------------------------------------|------------------------------------------------------------------------------------------------------------------------|-------|------------|
| Value                                                                                                                                                       | Label                                                                                                                  | Cases | Percentage |
| 6                                                                                                                                                           | Great benefit                                                                                                          | 13    | 0.3%       |
| 7                                                                                                                                                           | Very great benefit                                                                                                     | 2     | 0.0%       |
| 97                                                                                                                                                          | No answer                                                                                                              | 3     | 0.1%       |
| 98                                                                                                                                                          | Not asked                                                                                                              | 4540  | 96.8%      |
| Warning: these figures indicate the number of cases found in the data file. They cannot be interpreted as summary statistics of the population of interest. |                                                                                                                        |       |            |
| # r7dvinn: How mild/strict should Norway's immigration politics be?                                                                                         |                                                                                                                        |       |            |
| Information                                                                                                                                                 | [Type= discrete] [Format=numeric] [Range= 1-7] [Missing=*]                                                             |       |            |
| Statistics [NW/ W]                                                                                                                                          | [Valid=4689 /-] [Invalid=0 /-]                                                                                         |       |            |
| Literal question                                                                                                                                            | How mild or strict should Norway's immigration politics be?                                                            |       |            |
| Interviewer's instructions                                                                                                                                  | [Asked if u=4. ]                                                                                                       |       |            |
| Value                                                                                                                                                       | Label                                                                                                                  | Cases | Percentage |
| 1                                                                                                                                                           | Very mild                                                                                                              | 5     | 0.1%       |
| 2                                                                                                                                                           | Mild                                                                                                                   | 55    | 1.2%       |
| 3                                                                                                                                                           | Somewhat mild                                                                                                          | 110   | 2.3%       |
| 4                                                                                                                                                           | Neither mild nor strict                                                                                                | 194   | 4.1%       |
| 5                                                                                                                                                           | Somewhat strict                                                                                                        | 388   | 8.3%       |
| 6                                                                                                                                                           | Strict                                                                                                                 | 293   | 6.2%       |
| 7                                                                                                                                                           | Very strict                                                                                                            | 116   | 2.5%       |
| 97                                                                                                                                                          | No answer                                                                                                              | 42    | 0.9%       |
| 98                                                                                                                                                          | Not asked                                                                                                              | 3486  | 74.3%      |
| Warning: these figures indicate the number of cases found in the data file. They cannot be interpreted as summary statistics of the population of interest. |                                                                                                                        |       |            |
| # r7nfc_1: Statement: Prefers complicated rather than easy tasks                                                                                            |                                                                                                                        |       |            |
| Information                                                                                                                                                 | [Type= discrete] [Format=numeric] [Range= 1-7] [Missing=*]                                                             |       |            |
| Statistics [NW/ W]                                                                                                                                          | [Valid=4689 /-] [Invalid=0 /-]                                                                                         |       |            |
| Pre-question                                                                                                                                                | How much do you agree or disagree with the following statements:                                                       |       |            |
| Literal question                                                                                                                                            | I prefer complicated rather than easy tasks                                                                            |       |            |
| Interviewer's instructions                                                                                                                                  | [Only asked to respondents that have not answered on R5NFC in wave 5.]                                                 |       |            |
| Notes                                                                                                                                                       | Jeg foretrekker kompliserte fremfor lette oppgaver. (Nå kommer noen litt andre typer spørsmål.Hvor enig eller uenig er |       |            |
| Value                                                                                                                                                       | Label                                                                                                                  | Cases | Percentage |
| 1                                                                                                                                                           | Strongly agree                                                                                                         | 54    | 1.2%       |
| 2                                                                                                                                                           | Agree                                                                                                                  | 181   | 3.9%       |
| 3                                                                                                                                                           | Somewhat agree                                                                                                         | 224   | 4.8%       |
| 4                                                                                                                                                           | Neither agree nor disagree                                                                                             | 163   | 3.5%       |
| 5                                                                                                                                                           | Somewhat disagree                                                                                                      | 70    | 1.5%       |
| 6                                                                                                                                                           | Disagree                                                                                                               | 37    | 0.8%       |
| 7                                                                                                                                                           | Strongly disagree                                                                                                      | 7     | 0.1%       |
| 97                                                                                                                                                          | No answer                                                                                                              | 88    | 1.9%       |
| 98                                                                                                                                                          | Not asked                                                                                                              | 3865  | 82.4%      |
| Warning: these figures indicate the number of cases found in the data file. They cannot be interpreted as summary statistics of the population of interest. |                                                                                                                        |       |            |
| # r7nfc_2: Statement: Likes tasks where you come up with new solutions                                                                                      |                                                                                                                        |       |            |
| Information                                                                                                                                                 | [Type= discrete] [Format=numeric] [Range= 1-7] [Missing=*]                                                             |       |            |
| Statistics [NW/ W]                                                                                                                                          | [Valid=4689 /-] [Invalid=0 /-]                                                                                         |       |            |

| # r7nfc_2: Statement: Likes tasks where you come up with new solutions                                                                                      |                            |                                                                                                                          |             |       |
|-------------------------------------------------------------------------------------------------------------------------------------------------------------|----------------------------|--------------------------------------------------------------------------------------------------------------------------|-------------|-------|
| Pre-question                                                                                                                                                |                            | How much do you agree or disagree with the following statements:                                                         |             |       |
| Literal question                                                                                                                                            |                            | I really like tasks where the idea is to come up with new solutions.                                                     |             |       |
| Interviewer's instructions                                                                                                                                  |                            | [Only asked to respondents that have not answered on R5NFC in wave 5.]                                                   |             |       |
| Notes                                                                                                                                                       |                            | Jeg liker svært godt oppgaver som går ut på at man må komme opp med nye løsninger. (Nå kommer noen litt andre typer      |             |       |
| Value                                                                                                                                                       | Label                      | Cases                                                                                                                    | Percentage  |       |
| 1                                                                                                                                                           | Strongly agree             | 110                                                                                                                      | <div></div> | 2.3%  |
| 2                                                                                                                                                           | Agree                      | 289                                                                                                                      | <div></div> | 6.2%  |
| 3                                                                                                                                                           | Somewhat agree             | 198                                                                                                                      | <div></div> | 4.2%  |
| 4                                                                                                                                                           | Neither agree nor disagree | 100                                                                                                                      | <div></div> | 2.1%  |
| 5                                                                                                                                                           | Somewhat disagree          | 32                                                                                                                       | <div></div> | 0.7%  |
| 6                                                                                                                                                           | Disagree                   | 9                                                                                                                        | <div></div> | 0.2%  |
| 7                                                                                                                                                           | Strongly disagree          | 3                                                                                                                        | <div></div> | 0.1%  |
| 97                                                                                                                                                          | No answer                  | 83                                                                                                                       | <div></div> | 1.8%  |
| 98                                                                                                                                                          | Not asked                  | 3865                                                                                                                     | <div></div> | 82.4% |
| Warning: these figures indicate the number of cases found in the data file. They cannot be interpreted as summary statistics of the population of interest. |                            |                                                                                                                          |             |       |
| # r7nfc_3: Statement: Would prefer a task that is intellectual rather than one needing little thought                                                       |                            |                                                                                                                          |             |       |
| Information                                                                                                                                                 |                            | [Type= discrete] [Format=numeric] [Range= 1-7] [Missing=*]                                                               |             |       |
| Statistics [NW/ W]                                                                                                                                          |                            | [Valid=4689 /-] [Invalid=0 /-]                                                                                           |             |       |
| Pre-question                                                                                                                                                |                            | How much do you agree or disagree with the following statements:                                                         |             |       |
| Literal question                                                                                                                                            |                            | I would prefer a task that is intellectual and complex rather than one that needs little thought.                        |             |       |
| Interviewer's instructions                                                                                                                                  |                            | Only asked to respondents that have not answered on R5NFC in wave 5.]                                                    |             |       |
| Notes                                                                                                                                                       |                            | Jeg ville foretrukket en oppgave som er intellektuell og innviklet fremfor en oppgave som krever lite tenking. (Nå komme |             |       |
| Value                                                                                                                                                       | Label                      | Cases                                                                                                                    | Percentage  |       |
| 1                                                                                                                                                           | Strongly agree             | 83                                                                                                                       | <div></div> | 1.8%  |
| 2                                                                                                                                                           | Agree                      | 235                                                                                                                      | <div></div> | 5.0%  |
| 3                                                                                                                                                           | Somewhat agree             | 173                                                                                                                      | <div></div> | 3.7%  |
| 4                                                                                                                                                           | Neither agree nor disagree | 147                                                                                                                      | <div></div> | 3.1%  |
| 5                                                                                                                                                           | Somewhat disagree          | 56                                                                                                                       | <div></div> | 1.2%  |
| 6                                                                                                                                                           | Disagree                   | 34                                                                                                                       | <div></div> | 0.7%  |
| 7                                                                                                                                                           | Strongly disagree          | 5                                                                                                                        | <div></div> | 0.1%  |
| 97                                                                                                                                                          | No answer                  | 91                                                                                                                       | <div></div> | 1.9%  |
| 98                                                                                                                                                          | Not asked                  | 3865                                                                                                                     | <div></div> | 82.4% |
| Warning: these figures indicate the number of cases found in the data file. They cannot be interpreted as summary statistics of the population of interest. |                            |                                                                                                                          |             |       |
| # r7nte_1: Statement: Opinion about most things                                                                                                             |                            |                                                                                                                          |             |       |
| Information                                                                                                                                                 |                            | [Type= discrete] [Format=numeric] [Range= 1-7] [Missing=*]                                                               |             |       |
| Statistics [NW/ W]                                                                                                                                          |                            | [Valid=4689 /-] [Invalid=0 /-]                                                                                           |             |       |
| Pre-question                                                                                                                                                |                            | How much do you agree or disagree with the following statements:                                                         |             |       |
| Literal question                                                                                                                                            |                            | I have an opinion about most things                                                                                      |             |       |
| Interviewer's instructions                                                                                                                                  |                            | [Only asked to respondents that have not answered on R5NTE in wave 5.]                                                   |             |       |
| Notes                                                                                                                                                       |                            | Jeg har en mening om det aller meste. (Hvor enig eller uenig er du i følgende utsagn:)                                   |             |       |
| Value                                                                                                                                                       | Label                      | Cases                                                                                                                    | Percentage  |       |
| 1                                                                                                                                                           | Strongly agree             | 53                                                                                                                       | <div></div> | 1.1%  |
| 2                                                                                                                                                           | Agree                      | 190                                                                                                                      | <div></div> | 4.1%  |

| # r7nte_1: Statement: Opinion about most things                                                                                                             |                                                                                                            |       |                        |       |
|-------------------------------------------------------------------------------------------------------------------------------------------------------------|------------------------------------------------------------------------------------------------------------|-------|------------------------|-------|
| Value                                                                                                                                                       | Label                                                                                                      | Cases | Percentage             |       |
| 3                                                                                                                                                           | Somewhat agree                                                                                             | 270   | <div><div></div></div> | 5.8%  |
| 4                                                                                                                                                           | Neither agree nor disagree                                                                                 | 93    | <div><div></div></div> | 2.0%  |
| 5                                                                                                                                                           | Somewhat disagree                                                                                          | 83    | <div><div></div></div> | 1.8%  |
| 6                                                                                                                                                           | Disagree                                                                                                   | 36    | <div><div></div></div> | 0.8%  |
| 7                                                                                                                                                           | Strongly disagree                                                                                          | 3     | <div><div></div></div> | 0.1%  |
| 97                                                                                                                                                          | No answer                                                                                                  | 76    | <div><div></div></div> | 1.6%  |
| 98                                                                                                                                                          | Not asked                                                                                                  | 3885  | <div><div></div></div> | 82.9% |
| Warning: these figures indicate the number of cases found in the data file. They cannot be interpreted as summary statistics of the population of interest. |                                                                                                            |       |                        |       |
| # r7nte_2: Statement: Important to have a view on whether something is right/wrong                                                                          |                                                                                                            |       |                        |       |
| Information                                                                                                                                                 | [Type= discrete] [Format=numeric] [Range= 1-7] [Missing=*]                                                 |       |                        |       |
| Statistics [NW/ W]                                                                                                                                          | [Valid=4689 /-] [Invalid=0 /-]                                                                             |       |                        |       |
| Pre-question                                                                                                                                                | How much do you agree or disagree with the following statements:                                           |       |                        |       |
| Literal question                                                                                                                                            | I think it is important to have a view on whether something is right or wrong                              |       |                        |       |
| Interviewer's instructions                                                                                                                                  | [Only asked to respondents that have not answered on R5NTE in wave 5.]                                     |       |                        |       |
| Notes                                                                                                                                                       | Jeg synes det er viktig å mene om noe er rett eller galt. (Hvor enig eller uenig er du i følgende utsagn:) |       |                        |       |
| Value                                                                                                                                                       | Label                                                                                                      | Cases | Percentage             |       |
| 1                                                                                                                                                           | Strongly agree                                                                                             | 108   | <div><div></div></div> | 2.3%  |
| 2                                                                                                                                                           | Agree                                                                                                      | 312   | <div><div></div></div> | 6.7%  |
| 3                                                                                                                                                           | Somewhat agree                                                                                             | 179   | <div><div></div></div> | 3.8%  |
| 4                                                                                                                                                           | Neither agree nor disagree                                                                                 | 77    | <div><div></div></div> | 1.6%  |
| 5                                                                                                                                                           | Somewhat disagree                                                                                          | 36    | <div><div></div></div> | 0.8%  |
| 6                                                                                                                                                           | Disagree                                                                                                   | 15    | <div><div></div></div> | 0.3%  |
| 7                                                                                                                                                           | Strongly disagree                                                                                          | 7     | <div><div></div></div> | 0.1%  |
| 97                                                                                                                                                          | No answer                                                                                                  | 70    | <div><div></div></div> | 1.5%  |
| 98                                                                                                                                                          | Not asked                                                                                                  | 3885  | <div><div></div></div> | 82.9% |
| Warning: these figures indicate the number of cases found in the data file. They cannot be interpreted as summary statistics of the population of interest. |                                                                                                            |       |                        |       |
| # r7k13: How often do you discuss politics with others?                                                                                                     |                                                                                                            |       |                        |       |
| Information                                                                                                                                                 | [Type= discrete] [Format=numeric] [Range= 1-4] [Missing=*]                                                 |       |                        |       |
| Statistics [NW/ W]                                                                                                                                          | [Valid=4689 /-] [Invalid=0 /-]                                                                             |       |                        |       |
| Literal question                                                                                                                                            | How often would you say that you discuss politics with others?                                             |       |                        |       |
| Interviewer's instructions                                                                                                                                  | [Only asked to respondents that have not answered on R5NFC in wave 5.]                                     |       |                        |       |
| Value                                                                                                                                                       | Label                                                                                                      | Cases | Percentage             |       |
| 1                                                                                                                                                           | Often                                                                                                      | 213   | <div><div></div></div> | 4.5%  |
| 2                                                                                                                                                           | Sometimes                                                                                                  | 413   | <div><div></div></div> | 8.8%  |
| 3                                                                                                                                                           | Rarely                                                                                                     | 196   | <div><div></div></div> | 4.2%  |
| 4                                                                                                                                                           | Never                                                                                                      | 24    | <div><div></div></div> | 0.5%  |
| 97                                                                                                                                                          | No answer                                                                                                  | 71    | <div><div></div></div> | 1.5%  |
| 98                                                                                                                                                          | Not asked                                                                                                  | 3772  | <div><div></div></div> | 80.4% |
| Warning: these figures indicate the number of cases found in the data file. They cannot be interpreted as summary statistics of the population of interest. |                                                                                                            |       |                        |       |
| # r7k33: Which description best applies to what you have been doing the last week?                                                                          |                                                                                                            |       |                        |       |
| Information                                                                                                                                                 | [Type= discrete] [Format=numeric] [Range= 1-9] [Missing=*]                                                 |       |                        |       |
| Statistics [NW/ W]                                                                                                                                          | [Valid=4689 /-] [Invalid=0 /-]                                                                             |       |                        |       |



| # r7k33: Which description best applies to what you have been doing the last week?                                                                          |                                                       |                                                                                                   |             |        |
|-------------------------------------------------------------------------------------------------------------------------------------------------------------|-------------------------------------------------------|---------------------------------------------------------------------------------------------------|-------------|--------|
| <b>Literal question</b>                                                                                                                                     |                                                       | Which of the following descriptions best applies to what you have been doing for the last 7 days. |             |        |
| <b>Post-question</b>                                                                                                                                        |                                                       | Mark one alternative.                                                                             |             |        |
| <b>Interviewer's instructions</b>                                                                                                                           |                                                       | [Only asked to respondents that have not answered on R5NFC in wave 5.]                            |             |        |
| <b>Notes</b>                                                                                                                                                |                                                       | Hvilken av beskrivelsene under passer best på det du har gjort de siste 7 dagene?                 |             |        |
| Value                                                                                                                                                       | Label                                                 | Cases                                                                                             | Percentage  |        |
| 1                                                                                                                                                           | Paid work (or temporarily absent)                     | 541                                                                                               | <div></div> | 11.5%  |
| 2                                                                                                                                                           | Studying (not paid for by an employer)                | 70                                                                                                | <div></div> | 1.5%   |
| 3                                                                                                                                                           | Unemployed and actively seeking work                  | 26                                                                                                | <div></div> | 0.6%   |
| 4                                                                                                                                                           | Unemployed. Want a job, but not actively seeking work | 10                                                                                                | <div></div> | 0.2%   |
| 5                                                                                                                                                           | Permanently ill or disabled                           | 32                                                                                                | <div></div> | 0.7%   |
| 6                                                                                                                                                           | Retired                                               | 141                                                                                               | <div></div> | 3.0%   |
| 7                                                                                                                                                           | Civilian or military service                          | 1                                                                                                 | <div></div> | 0.0%   |
| 8                                                                                                                                                           | At home, looking after children or others             | 20                                                                                                | <div></div> | 0.4%   |
| 9                                                                                                                                                           | Other                                                 | 42                                                                                                | <div></div> | 0.9%   |
| 97                                                                                                                                                          | No answer                                             | 83                                                                                                | <div></div> | 1.8%   |
| 98                                                                                                                                                          | Not asked                                             | 3723                                                                                              | <div></div> | 79.4%  |
| Warning: these figures indicate the number of cases found in the data file. They cannot be interpreted as summary statistics of the population of interest. |                                                       |                                                                                                   |             |        |
| # r7k33_9_other: Which description best applies to what you have been doing the last week? Other [anonymized]                                               |                                                       |                                                                                                   |             |        |
| <b>Information</b>                                                                                                                                          |                                                       | [Type= discrete] [Format=character] [Missing=*]                                                   |             |        |
| <b>Statistics [NW/ W]</b>                                                                                                                                   |                                                       | [Valid=4689 /-] [Invalid=0 /-]                                                                    |             |        |
| <b>Literal question</b>                                                                                                                                     |                                                       | Which of the following descriptions best applies to what you have been doing for the last 7 days. |             |        |
| <b>Post-question</b>                                                                                                                                        |                                                       | Mark one alternative.                                                                             |             |        |
| <b>Interviewer's instructions</b>                                                                                                                           |                                                       | [Only asked to respondents that have not answered on R5NFC in wave 5.]                            |             |        |
|                                                                                                                                                             |                                                       | [Data withheld for the sake of anonymity]                                                         |             |        |
| <b>Notes</b>                                                                                                                                                |                                                       | Annet (Hvilken av beskrivelsene under passer best på det du har gjort de siste 7 dagene? )        |             |        |
| Value                                                                                                                                                       | Label                                                 | Cases                                                                                             | Percentage  |        |
|                                                                                                                                                             |                                                       | 4689                                                                                              | <div></div> | 100.0% |
| Warning: these figures indicate the number of cases found in the data file. They cannot be interpreted as summary statistics of the population of interest. |                                                       |                                                                                                   |             |        |
| # r7k34_1: What industry do you work in: Public central administration                                                                                      |                                                       |                                                                                                   |             |        |
| <b>Information</b>                                                                                                                                          |                                                       | [Type= discrete] [Format=numeric] [Range= 1-1] [Missing=*]                                        |             |        |
| <b>Statistics [NW/ W]</b>                                                                                                                                   |                                                       | [Valid=4689 /-] [Invalid=0 /-]                                                                    |             |        |
| <b>Literal question</b>                                                                                                                                     |                                                       | What industry do you (your company) work in?                                                      |             |        |
| <b>Post-question</b>                                                                                                                                        |                                                       | It is possible to mark more than one answer.                                                      |             |        |
| <b>Interviewer's instructions</b>                                                                                                                           |                                                       | [Only asked to respondents that have answered on R6K33 in wave 6.]                                |             |        |
| <b>Notes</b>                                                                                                                                                |                                                       | Offentlig sentralforvaltning/myndighet (Hvilken bransje arbeider du (din bedrift) innenfor? )     |             |        |
| Value                                                                                                                                                       | Label                                                 | Cases                                                                                             | Percentage  |        |
| 0                                                                                                                                                           |                                                       | 3406                                                                                              | <div></div> | 72.6%  |
| 1                                                                                                                                                           | Public central administration/authority               | 275                                                                                               | <div></div> | 5.9%   |
| 97                                                                                                                                                          | No answer                                             | 42                                                                                                | <div></div> | 0.9%   |
| 98                                                                                                                                                          | Not asked                                             | 966                                                                                               | <div></div> | 20.6%  |
| Warning: these figures indicate the number of cases found in the data file. They cannot be interpreted as summary statistics of the population of interest. |                                                       |                                                                                                   |             |        |

| # r7k34_2: What industry do you work in: Kindergarten/school/teaching                                                                                       |                                                                                     |       |                   |
|-------------------------------------------------------------------------------------------------------------------------------------------------------------|-------------------------------------------------------------------------------------|-------|-------------------|
| Information                                                                                                                                                 | [Type= discrete] [Format=numeric] [Range= 1-1] [Missing=*]                          |       |                   |
| Statistics [NW/ W]                                                                                                                                          | [Valid=4689 /-] [Invalid=0 /-]                                                      |       |                   |
| Literal question                                                                                                                                            | What industry do you (your company) work in?                                        |       |                   |
| Post-question                                                                                                                                               | It is possible to mark more than one answer.                                        |       |                   |
| Interviewer's instructions                                                                                                                                  | [Only asked to respondents that have answered on R6K33 in wave 6.]                  |       |                   |
| Notes                                                                                                                                                       | Barnehage/skole/undervisning (Hvilken bransje arbeider du (din bedrift) innenfor? ) |       |                   |
| Value                                                                                                                                                       | Label                                                                               | Cases | Percentage        |
| 0                                                                                                                                                           |                                                                                     | 3249  | <div></div> 69.3% |
| 1                                                                                                                                                           | Kindergarten/school/teaching                                                        | 432   | <div></div> 9.2%  |
| 97                                                                                                                                                          | No answer                                                                           | 42    | <div></div> 0.9%  |
| 98                                                                                                                                                          | Not asked                                                                           | 966   | <div></div> 20.6% |
| Warning: these figures indicate the number of cases found in the data file. They cannot be interpreted as summary statistics of the population of interest. |                                                                                     |       |                   |
| # r7k34_3: What industry do you work in: Health services                                                                                                    |                                                                                     |       |                   |
| Information                                                                                                                                                 | [Type= discrete] [Format=numeric] [Range= 1-1] [Missing=*]                          |       |                   |
| Statistics [NW/ W]                                                                                                                                          | [Valid=4689 /-] [Invalid=0 /-]                                                      |       |                   |
| Literal question                                                                                                                                            | What industry do you (your company) work in?                                        |       |                   |
| Post-question                                                                                                                                               | It is possible to mark more than one answer.                                        |       |                   |
| Interviewer's instructions                                                                                                                                  | [Only asked to respondents that have answered on R6K33 in wave 6.]                  |       |                   |
| Value                                                                                                                                                       | Label                                                                               | Cases | Percentage        |
| 0                                                                                                                                                           |                                                                                     | 3259  | <div></div> 69.5% |
| 1                                                                                                                                                           | Health services                                                                     | 422   | <div></div> 9.0%  |
| 97                                                                                                                                                          | No answer                                                                           | 42    | <div></div> 0.9%  |
| 98                                                                                                                                                          | Not asked                                                                           | 966   | <div></div> 20.6% |
| Warning: these figures indicate the number of cases found in the data file. They cannot be interpreted as summary statistics of the population of interest. |                                                                                     |       |                   |
| # r7k34_4: What industry do you work in: Social services/child protection                                                                                   |                                                                                     |       |                   |
| Information                                                                                                                                                 | [Type= discrete] [Format=numeric] [Range= 1-1] [Missing=*]                          |       |                   |
| Statistics [NW/ W]                                                                                                                                          | [Valid=4689 /-] [Invalid=0 /-]                                                      |       |                   |
| Literal question                                                                                                                                            | What industry do you (your company) work in?                                        |       |                   |
| Post-question                                                                                                                                               | It is possible to mark more than one answer.                                        |       |                   |
| Interviewer's instructions                                                                                                                                  | [Only asked to respondents that have answered on R6K33 in wave 6.]                  |       |                   |
| Value                                                                                                                                                       | Label                                                                               | Cases | Percentage        |
| 0                                                                                                                                                           |                                                                                     | 3600  | <div></div> 76.8% |
| 1                                                                                                                                                           | Social services/child protection                                                    | 81    | <div></div> 1.7%  |
| 97                                                                                                                                                          | No answer                                                                           | 42    | <div></div> 0.9%  |
| 98                                                                                                                                                          | Not asked                                                                           | 966   | <div></div> 20.6% |
| Warning: these figures indicate the number of cases found in the data file. They cannot be interpreted as summary statistics of the population of interest. |                                                                                     |       |                   |
| # r7k34_5: What industry do you work in: Nursing and care services                                                                                          |                                                                                     |       |                   |
| Information                                                                                                                                                 | [Type= discrete] [Format=numeric] [Range= 1-1] [Missing=*]                          |       |                   |
| Statistics [NW/ W]                                                                                                                                          | [Valid=4689 /-] [Invalid=0 /-]                                                      |       |                   |
| Literal question                                                                                                                                            | What industry do you (your company) work in?                                        |       |                   |
| Post-question                                                                                                                                               | It is possible to mark more than one answer.                                        |       |                   |
| Interviewer's instructions                                                                                                                                  | [Only asked to respondents that have answered on R6K33 in wave 6.]                  |       |                   |

| # r7k34_5: What industry do you work in: Nursing and care services                                                                                                 |                                         |                                                                                           |                   |
|--------------------------------------------------------------------------------------------------------------------------------------------------------------------|-----------------------------------------|-------------------------------------------------------------------------------------------|-------------------|
| <b>Notes</b>                                                                                                                                                       |                                         | Pleie- og omsorgstjenester (Hvilken bransje arbeider du (din bedrift) innenfor? )         |                   |
| Value                                                                                                                                                              | Label                                   | Cases                                                                                     | Percentage        |
| 0                                                                                                                                                                  |                                         | 3527                                                                                      | <div></div> 75.2% |
| 1                                                                                                                                                                  | Nursing and care services               | 154                                                                                       | <div></div> 3.3%  |
| 97                                                                                                                                                                 | No answer                               | 42                                                                                        | <div></div> 0.9%  |
| 98                                                                                                                                                                 | Not asked                               | 966                                                                                       | <div></div> 20.6% |
| <i>Warning: these figures indicate the number of cases found in the data file. They cannot be interpreted as summary statistics of the population of interest.</i> |                                         |                                                                                           |                   |
| # r7k34_6: What industry do you work in: Defence/police/judicial system/security                                                                                   |                                         |                                                                                           |                   |
| <b>Information</b>                                                                                                                                                 |                                         | [Type= discrete] [Format=numeric] [Range= 1-1] [Missing=*]                                |                   |
| <b>Statistics [NW/ W]</b>                                                                                                                                          |                                         | [Valid=4689 /-] [Invalid=0 /-]                                                            |                   |
| <b>Literal question</b>                                                                                                                                            |                                         | What industry do you (your company) work in?                                              |                   |
| <b>Post-question</b>                                                                                                                                               |                                         | It is possible to mark more than one answer.                                              |                   |
| <b>Interviewer's instructions</b>                                                                                                                                  |                                         | [Only asked to respondents that have answered on R6K33 in wave 6.]                        |                   |
| <b>Notes</b>                                                                                                                                                       |                                         | Forsvar/politi/rettsvesen/vakthold (Hvilken bransje arbeider du (din bedrift) innenfor? ) |                   |
| Value                                                                                                                                                              | Label                                   | Cases                                                                                     | Percentage        |
| 0                                                                                                                                                                  |                                         | 3586                                                                                      | <div></div> 76.5% |
| 1                                                                                                                                                                  | Defence/police/judicial system/security | 95                                                                                        | <div></div> 2.0%  |
| 97                                                                                                                                                                 | No answer                               | 42                                                                                        | <div></div> 0.9%  |
| 98                                                                                                                                                                 | Not asked                               | 966                                                                                       | <div></div> 20.6% |
| <i>Warning: these figures indicate the number of cases found in the data file. They cannot be interpreted as summary statistics of the population of interest.</i> |                                         |                                                                                           |                   |
| # r7k34_7: What industry do you work in: Agriculture/forestry/fishing                                                                                              |                                         |                                                                                           |                   |
| <b>Information</b>                                                                                                                                                 |                                         | [Type= discrete] [Format=numeric] [Range= 1-1] [Missing=*]                                |                   |
| <b>Statistics [NW/ W]</b>                                                                                                                                          |                                         | [Valid=4689 /-] [Invalid=0 /-]                                                            |                   |
| <b>Literal question</b>                                                                                                                                            |                                         | What industry do you (your company) work in?                                              |                   |
| <b>Post-question</b>                                                                                                                                               |                                         | It is possible to mark more than one answer.                                              |                   |
| <b>Interviewer's instructions</b>                                                                                                                                  |                                         | [Only asked to respondents that have answered on R6K33 in wave 6.]                        |                   |
| Value                                                                                                                                                              | Label                                   | Cases                                                                                     | Percentage        |
| 0                                                                                                                                                                  |                                         | 3560                                                                                      | <div></div> 75.9% |
| 1                                                                                                                                                                  | Agriculture/forestry/fishing            | 121                                                                                       | <div></div> 2.6%  |
| 97                                                                                                                                                                 | No answer                               | 42                                                                                        | <div></div> 0.9%  |
| 98                                                                                                                                                                 | Not asked                               | 966                                                                                       | <div></div> 20.6% |
| <i>Warning: these figures indicate the number of cases found in the data file. They cannot be interpreted as summary statistics of the population of interest.</i> |                                         |                                                                                           |                   |
| # r7k34_8: What industry do you work in: Industry/technology                                                                                                       |                                         |                                                                                           |                   |
| <b>Information</b>                                                                                                                                                 |                                         | [Type= discrete] [Format=numeric] [Range= 1-1] [Missing=*]                                |                   |
| <b>Statistics [NW/ W]</b>                                                                                                                                          |                                         | [Valid=4689 /-] [Invalid=0 /-]                                                            |                   |
| <b>Literal question</b>                                                                                                                                            |                                         | What industry do you (your company) work in?                                              |                   |
| <b>Post-question</b>                                                                                                                                               |                                         | It is possible to mark more than one answer.                                              |                   |
| <b>Interviewer's instructions</b>                                                                                                                                  |                                         | [Only asked to respondents that have answered on R6K33 in wave 6.]                        |                   |
| Value                                                                                                                                                              | Label                                   | Cases                                                                                     | Percentage        |
| 0                                                                                                                                                                  |                                         | 3451                                                                                      | <div></div> 73.6% |
| 1                                                                                                                                                                  | Industry/technology                     | 230                                                                                       | <div></div> 4.9%  |
| 97                                                                                                                                                                 | No answer                               | 42                                                                                        | <div></div> 0.9%  |

| # r7k34_8: What industry do you work in: Industry/technology                                                                                                |                                                                    |       |                   |
|-------------------------------------------------------------------------------------------------------------------------------------------------------------|--------------------------------------------------------------------|-------|-------------------|
| Value                                                                                                                                                       | Label                                                              | Cases | Percentage        |
| 98                                                                                                                                                          | Not asked                                                          | 966   | <div></div> 20.6% |
| Warning: these figures indicate the number of cases found in the data file. They cannot be interpreted as summary statistics of the population of interest. |                                                                    |       |                   |
| # r7k34_9: What industry do you work in: Building/construction                                                                                              |                                                                    |       |                   |
| Information                                                                                                                                                 | [Type= discrete] [Format=numeric] [Range= 1-1] [Missing=*]         |       |                   |
| Statistics [NW/ W]                                                                                                                                          | [Valid=4689 /-] [Invalid=0 /-]                                     |       |                   |
| Literal question                                                                                                                                            | What industry do you (your company) work in?                       |       |                   |
| Post-question                                                                                                                                               | It is possible to mark more than one answer.                       |       |                   |
| Interviewer's instructions                                                                                                                                  | [Only asked to respondents that have answered on R6K33 in wave 6.] |       |                   |
| Value                                                                                                                                                       | Label                                                              | Cases | Percentage        |
| 0                                                                                                                                                           |                                                                    | 3422  | <div></div> 73.0% |
| 1                                                                                                                                                           | Building/construction                                              | 259   | <div></div> 5.5%  |
| 97                                                                                                                                                          | No answer                                                          | 42    | <div></div> 0.9%  |
| 98                                                                                                                                                          | Not asked                                                          | 966   | <div></div> 20.6% |
| Warning: these figures indicate the number of cases found in the data file. They cannot be interpreted as summary statistics of the population of interest. |                                                                    |       |                   |
| # r7k34_10: What industry do you work in: Retailing/shop                                                                                                    |                                                                    |       |                   |
| Information                                                                                                                                                 | [Type= discrete] [Format=numeric] [Range= 1-1] [Missing=*]         |       |                   |
| Statistics [NW/ W]                                                                                                                                          | [Valid=4689 /-] [Invalid=0 /-]                                     |       |                   |
| Literal question                                                                                                                                            | What industry do you (your company) work in?                       |       |                   |
| Post-question                                                                                                                                               | It is possible to mark more than one answer.                       |       |                   |
| Interviewer's instructions                                                                                                                                  | [Only asked to respondents that have answered on R6K33 in wave 6.] |       |                   |
| Value                                                                                                                                                       | Label                                                              | Cases | Percentage        |
| 0                                                                                                                                                           |                                                                    | 3512  | <div></div> 74.9% |
| 1                                                                                                                                                           | Retailing/shop                                                     | 169   | <div></div> 3.6%  |
| 97                                                                                                                                                          | No answer                                                          | 42    | <div></div> 0.9%  |
| 98                                                                                                                                                          | Not asked                                                          | 966   | <div></div> 20.6% |
| Warning: these figures indicate the number of cases found in the data file. They cannot be interpreted as summary statistics of the population of interest. |                                                                    |       |                   |
| # r7k34_11: What industry do you work in: Transport/communications                                                                                          |                                                                    |       |                   |
| Information                                                                                                                                                 | [Type= discrete] [Format=numeric] [Range= 1-1] [Missing=*]         |       |                   |
| Statistics [NW/ W]                                                                                                                                          | [Valid=4689 /-] [Invalid=0 /-]                                     |       |                   |
| Literal question                                                                                                                                            | What industry do you (your company) work in?                       |       |                   |
| Post-question                                                                                                                                               | It is possible to mark more than one answer.                       |       |                   |
| Interviewer's instructions                                                                                                                                  | [Only asked to respondents that have answered on R6K33 in wave 6.] |       |                   |
| Value                                                                                                                                                       | Label                                                              | Cases | Percentage        |
| 0                                                                                                                                                           |                                                                    | 3515  | <div></div> 75.0% |
| 1                                                                                                                                                           | Transport/communications                                           | 166   | <div></div> 3.5%  |
| 97                                                                                                                                                          | No answer                                                          | 42    | <div></div> 0.9%  |
| 98                                                                                                                                                          | Not asked                                                          | 966   | <div></div> 20.6% |
| Warning: these figures indicate the number of cases found in the data file. They cannot be interpreted as summary statistics of the population of interest. |                                                                    |       |                   |
| # r7k34_12: What industry do you work in: Culture/sport/organisations                                                                                       |                                                                    |       |                   |
| Information                                                                                                                                                 | [Type= discrete] [Format=numeric] [Range= 1-1] [Missing=*]         |       |                   |
| Statistics [NW/ W]                                                                                                                                          | [Valid=4689 /-] [Invalid=0 /-]                                     |       |                   |

| # r7k34_12: What industry do you work in: Culture/sport/organisations                                                                                              |                                                                                     |       |                              |
|--------------------------------------------------------------------------------------------------------------------------------------------------------------------|-------------------------------------------------------------------------------------|-------|------------------------------|
| <b>Literal question</b>                                                                                                                                            | What industry do you (your company) work in?                                        |       |                              |
| <b>Post-question</b>                                                                                                                                               | It is possible to mark more than one answer.                                        |       |                              |
| <b>Interviewer's instructions</b>                                                                                                                                  | [Only asked to respondents that have answered on R6K33 in wave 6.]                  |       |                              |
| <b>Notes</b>                                                                                                                                                       | Kultur/idrett/organisasjoner (Hvilken bransje arbeider du (din bedrift) innenfor? ) |       |                              |
| Value                                                                                                                                                              | Label                                                                               | Cases | Percentage                   |
| 0                                                                                                                                                                  |                                                                                     | 3552  | <div><div></div></div> 75.8% |
| 1                                                                                                                                                                  | Cultur/sport/organisations                                                          | 129   | <div><div></div></div> 2.8%  |
| 97                                                                                                                                                                 | No answer                                                                           | 42    | <div><div></div></div> 0.9%  |
| 98                                                                                                                                                                 | Not asked                                                                           | 966   | <div><div></div></div> 20.6% |
| <i>Warning: these figures indicate the number of cases found in the data file. They cannot be interpreted as summary statistics of the population of interest.</i> |                                                                                     |       |                              |
| # r7k34_13: What industry do you work in: Media/advertising                                                                                                        |                                                                                     |       |                              |
| <b>Information</b>                                                                                                                                                 | [Type= discrete] [Format=numeric] [Range= 1-1] [Missing=*]                          |       |                              |
| <b>Statistics [NW/ W]</b>                                                                                                                                          | [Valid=4689 /-] [Invalid=0 /-]                                                      |       |                              |
| <b>Literal question</b>                                                                                                                                            | What industry do you (your company) work in?                                        |       |                              |
| <b>Post-question</b>                                                                                                                                               | It is possible to mark more than one answer.                                        |       |                              |
| <b>Interviewer's instructions</b>                                                                                                                                  | [Only asked to respondents that have answered on R6K33 in wave 6.]                  |       |                              |
| <b>Notes</b>                                                                                                                                                       | Media/reklame/PR/informasjon (Hvilken bransje arbeider du (din bedrift) innenfor? ) |       |                              |
| Value                                                                                                                                                              | Label                                                                               | Cases | Percentage                   |
| 0                                                                                                                                                                  |                                                                                     | 3598  | <div><div></div></div> 76.7% |
| 1                                                                                                                                                                  | Media/advertising/PR/information                                                    | 83    | <div><div></div></div> 1.8%  |
| 97                                                                                                                                                                 | No answer                                                                           | 42    | <div><div></div></div> 0.9%  |
| 98                                                                                                                                                                 | Not asked                                                                           | 966   | <div><div></div></div> 20.6% |
| <i>Warning: these figures indicate the number of cases found in the data file. They cannot be interpreted as summary statistics of the population of interest.</i> |                                                                                     |       |                              |
| # r7k34_14: What industry do you work in: Research/analysis                                                                                                        |                                                                                     |       |                              |
| <b>Information</b>                                                                                                                                                 | [Type= discrete] [Format=numeric] [Range= 1-1] [Missing=*]                          |       |                              |
| <b>Statistics [NW/ W]</b>                                                                                                                                          | [Valid=4689 /-] [Invalid=0 /-]                                                      |       |                              |
| <b>Literal question</b>                                                                                                                                            | What industry do you (your company) work in?                                        |       |                              |
| <b>Post-question</b>                                                                                                                                               | It is possible to mark more than one answer.                                        |       |                              |
| <b>Interviewer's instructions</b>                                                                                                                                  | [Only asked to respondents that have answered on R6K33 in wave 6.]                  |       |                              |
| Value                                                                                                                                                              | Label                                                                               | Cases | Percentage                   |
| 0                                                                                                                                                                  |                                                                                     | 3536  | <div><div></div></div> 75.4% |
| 1                                                                                                                                                                  | Research/analysis                                                                   | 145   | <div><div></div></div> 3.1%  |
| 97                                                                                                                                                                 | No answer                                                                           | 42    | <div><div></div></div> 0.9%  |
| 98                                                                                                                                                                 | Not asked                                                                           | 966   | <div><div></div></div> 20.6% |
| <i>Warning: these figures indicate the number of cases found in the data file. They cannot be interpreted as summary statistics of the population of interest.</i> |                                                                                     |       |                              |
| # r7k34_15: What industry do you work in: Travel/hotels                                                                                                            |                                                                                     |       |                              |
| <b>Information</b>                                                                                                                                                 | [Type= discrete] [Format=numeric] [Range= 1-1] [Missing=*]                          |       |                              |
| <b>Statistics [NW/ W]</b>                                                                                                                                          | [Valid=4689 /-] [Invalid=0 /-]                                                      |       |                              |
| <b>Literal question</b>                                                                                                                                            | What industry do you (your company) work in?                                        |       |                              |
| <b>Post-question</b>                                                                                                                                               | It is possible to mark more than one answer.                                        |       |                              |
| <b>Interviewer's instructions</b>                                                                                                                                  | [Only asked to respondents that have answered on R6K33 in wave 6.]                  |       |                              |

| # r7k34_15: What industry do you work in: Travel/hotels                                                                                                     |                                                                    |       |                   |
|-------------------------------------------------------------------------------------------------------------------------------------------------------------|--------------------------------------------------------------------|-------|-------------------|
| Value                                                                                                                                                       | Label                                                              | Cases | Percentage        |
| 0                                                                                                                                                           |                                                                    | 3634  | <div></div> 77.5% |
| 1                                                                                                                                                           | Travels/hotels                                                     | 47    | <div></div> 1.0%  |
| 97                                                                                                                                                          | No answer                                                          | 42    | <div></div> 0.9%  |
| 98                                                                                                                                                          | Not asked                                                          | 966   | <div></div> 20.6% |
| Warning: these figures indicate the number of cases found in the data file. They cannot be interpreted as summary statistics of the population of interest. |                                                                    |       |                   |
| # r7k34_16: What industry do you work in: Restaurants/catering                                                                                              |                                                                    |       |                   |
| Information                                                                                                                                                 | [Type= discrete] [Format=numeric] [Range= 1-1] [Missing=*]         |       |                   |
| Statistics [NW/ W]                                                                                                                                          | [Valid=4689 /-] [Invalid=0 /-]                                     |       |                   |
| Literal question                                                                                                                                            | What industry do you (your company) work in?                       |       |                   |
| Post-question                                                                                                                                               | It is possible to mark more than one answer.                       |       |                   |
| Interviewer's instructions                                                                                                                                  | [Only asked to respondents that have answered on R6K33 in wave 6.] |       |                   |
| Value                                                                                                                                                       | Label                                                              | Cases | Percentage        |
| 0                                                                                                                                                           |                                                                    | 3645  | <div></div> 77.7% |
| 1                                                                                                                                                           | Restaurants/catering                                               | 36    | <div></div> 0.8%  |
| 97                                                                                                                                                          | No answer                                                          | 42    | <div></div> 0.9%  |
| 98                                                                                                                                                          | Not asked                                                          | 966   | <div></div> 20.6% |
| Warning: these figures indicate the number of cases found in the data file. They cannot be interpreted as summary statistics of the population of interest. |                                                                    |       |                   |
| # r7k34_17: What industry do you work in: Telecommunications/IT                                                                                             |                                                                    |       |                   |
| Information                                                                                                                                                 | [Type= discrete] [Format=numeric] [Range= 1-1] [Missing=*]         |       |                   |
| Statistics [NW/ W]                                                                                                                                          | [Valid=4689 /-] [Invalid=0 /-]                                     |       |                   |
| Literal question                                                                                                                                            | What industry do you (your company) work in?                       |       |                   |
| Post-question                                                                                                                                               | It is possible to mark more than one answer.                       |       |                   |
| Interviewer's instructions                                                                                                                                  | [Only asked to respondents that have answered on R6K33 in wave 6.] |       |                   |
| Value                                                                                                                                                       | Label                                                              | Cases | Percentage        |
| 0                                                                                                                                                           |                                                                    | 3527  | <div></div> 75.2% |
| 1                                                                                                                                                           | Telecommunications/IT                                              | 154   | <div></div> 3.3%  |
| 97                                                                                                                                                          | No answer                                                          | 42    | <div></div> 0.9%  |
| 98                                                                                                                                                          | Not asked                                                          | 966   | <div></div> 20.6% |
| Warning: these figures indicate the number of cases found in the data file. They cannot be interpreted as summary statistics of the population of interest. |                                                                    |       |                   |
| # r7k34_18: What industry do you work in: Banking/insurance/finance                                                                                         |                                                                    |       |                   |
| Information                                                                                                                                                 | [Type= discrete] [Format=numeric] [Range= 1-1] [Missing=*]         |       |                   |
| Statistics [NW/ W]                                                                                                                                          | [Valid=4689 /-] [Invalid=0 /-]                                     |       |                   |
| Literal question                                                                                                                                            | What industry do you (your company) work in?                       |       |                   |
| Post-question                                                                                                                                               | It is possible to mark more than one answer.                       |       |                   |
| Interviewer's instructions                                                                                                                                  | [Only asked to respondents that have answered on R6K33 in wave 6.] |       |                   |
| Value                                                                                                                                                       | Label                                                              | Cases | Percentage        |
| 0                                                                                                                                                           |                                                                    | 3562  | <div></div> 76.0% |
| 1                                                                                                                                                           | Banking/insurance/finance                                          | 119   | <div></div> 2.5%  |
| 97                                                                                                                                                          | No answer                                                          | 42    | <div></div> 0.9%  |
| 98                                                                                                                                                          | Not asked                                                          | 966   | <div></div> 20.6% |
| Warning: these figures indicate the number of cases found in the data file. They cannot be interpreted as summary statistics of the population of interest. |                                                                    |       |                   |

| # r7k34_19: What industry do you work in: Commercial services                                                                                               |                                                                                                 |       |                   |
|-------------------------------------------------------------------------------------------------------------------------------------------------------------|-------------------------------------------------------------------------------------------------|-------|-------------------|
| Information                                                                                                                                                 | [Type= discrete] [Format=numeric] [Range= 1-1] [Missing=*]                                      |       |                   |
| Statistics [NW/ W]                                                                                                                                          | [Valid=4689 /-] [Invalid=0 /-]                                                                  |       |                   |
| Literal question                                                                                                                                            | What industry do you (your company) work in?                                                    |       |                   |
| Post-question                                                                                                                                               | It is possible to mark more than one answer.                                                    |       |                   |
| Interviewer's instructions                                                                                                                                  | [Only asked to respondents that have answered on R6K33 in wave 6.]                              |       |                   |
| Notes                                                                                                                                                       | Forretningsmessig service-/tjenesteyting (Hvilken bransje arbeider du (din bedrift) innenfor? ) |       |                   |
| Value                                                                                                                                                       | Label                                                                                           | Cases | Percentage        |
| 0                                                                                                                                                           |                                                                                                 | 3505  | <div></div> 74.7% |
| 1                                                                                                                                                           | Commercial services                                                                             | 176   | <div></div> 3.8%  |
| 97                                                                                                                                                          | No answer                                                                                       | 42    | <div></div> 0.9%  |
| 98                                                                                                                                                          | Not asked                                                                                       | 966   | <div></div> 20.6% |
| Warning: these figures indicate the number of cases found in the data file. They cannot be interpreted as summary statistics of the population of interest. |                                                                                                 |       |                   |
| # r7k34_20: What industry do you work in: Oil/gas                                                                                                           |                                                                                                 |       |                   |
| Information                                                                                                                                                 | [Type= discrete] [Format=numeric] [Range= 1-1] [Missing=*]                                      |       |                   |
| Statistics [NW/ W]                                                                                                                                          | [Valid=4689 /-] [Invalid=0 /-]                                                                  |       |                   |
| Literal question                                                                                                                                            | What industry do you (your company) work in?                                                    |       |                   |
| Post-question                                                                                                                                               | It is possible to mark more than one answer.                                                    |       |                   |
| Interviewer's instructions                                                                                                                                  | [Only asked to respondents that have answered on R6K33 in wave 6.]                              |       |                   |
| Value                                                                                                                                                       | Label                                                                                           | Cases | Percentage        |
| 0                                                                                                                                                           |                                                                                                 | 3517  | <div></div> 75.0% |
| 1                                                                                                                                                           | Oil/gas                                                                                         | 164   | <div></div> 3.5%  |
| 97                                                                                                                                                          | No answer                                                                                       | 42    | <div></div> 0.9%  |
| 98                                                                                                                                                          | Not asked                                                                                       | 966   | <div></div> 20.6% |
| Warning: these figures indicate the number of cases found in the data file. They cannot be interpreted as summary statistics of the population of interest. |                                                                                                 |       |                   |

| # r7k34_21: What industry do you work in: Other                                                                                                             |                                                                                       |       |                    |
|-------------------------------------------------------------------------------------------------------------------------------------------------------------|---------------------------------------------------------------------------------------|-------|--------------------|
| Information                                                                                                                                                 | [Type= discrete] [Format=numeric] [Range= 1-1] [Missing=*]                            |       |                    |
| Statistics [NW/ W]                                                                                                                                          | [Valid=4689 /-] [Invalid=0 /-]                                                        |       |                    |
| Literal question                                                                                                                                            | What industry do you (your company) work in?                                          |       |                    |
| Post-question                                                                                                                                               | It is possible to mark more than one answer.                                          |       |                    |
| Interviewer's instructions                                                                                                                                  | [Only asked to respondents that have answered on R6K33 in wave 6.]                    |       |                    |
| Value                                                                                                                                                       | Label                                                                                 | Cases | Percentage         |
| 0                                                                                                                                                           |                                                                                       | 2790  | <div></div> 59.5%  |
| 1                                                                                                                                                           | Other                                                                                 | 891   | <div></div> 19.0%  |
| 97                                                                                                                                                          | No answer                                                                             | 42    | <div></div> 0.9%   |
| 98                                                                                                                                                          | Not asked                                                                             | 966   | <div></div> 20.6%  |
| Warning: these figures indicate the number of cases found in the data file. They cannot be interpreted as summary statistics of the population of interest. |                                                                                       |       |                    |
| # r7k34_21_other: What industry do you work in: Other [anonymized]                                                                                          |                                                                                       |       |                    |
| Information                                                                                                                                                 | [Type= discrete] [Format=character] [Missing=*]                                       |       |                    |
| Statistics [NW/ W]                                                                                                                                          | [Valid=4689 /-] [Invalid=0 /-]                                                        |       |                    |
| Literal question                                                                                                                                            | What industry do you (your company) work in?                                          |       |                    |
| Post-question                                                                                                                                               | It is possible to mark more than one answer.                                          |       |                    |
| Interviewer's instructions                                                                                                                                  | [Only asked to respondents that have answered on R6K33 in wave 6.]                    |       |                    |
|                                                                                                                                                             | [Data withheld for the sake of anonymity]                                             |       |                    |
| Value                                                                                                                                                       | Label                                                                                 | Cases | Percentage         |
|                                                                                                                                                             |                                                                                       | 4689  | <div></div> 100.0% |
| Warning: these figures indicate the number of cases found in the data file. They cannot be interpreted as summary statistics of the population of interest. |                                                                                       |       |                    |
| # r7k35: Which description best fits the area you live in?                                                                                                  |                                                                                       |       |                    |
| Information                                                                                                                                                 | [Type= discrete] [Format=numeric] [Range= 1-5] [Missing=*]                            |       |                    |
| Statistics [NW/ W]                                                                                                                                          | [Valid=4689 /-] [Invalid=0 /-]                                                        |       |                    |
| Literal question                                                                                                                                            | Which description best fits the area you live in?                                     |       |                    |
| Post-question                                                                                                                                               | We are thinking about Norwegian conditions here.                                      |       |                    |
| Interviewer's instructions                                                                                                                                  | [Only asked to respondents that have not answered on R6K35 in wave 5.]                |       |                    |
| Notes                                                                                                                                                       | Hvilken beskrivelse passer best på området du bor i? Vi tenker her på norske forhold. |       |                    |
| Value                                                                                                                                                       | Label                                                                                 | Cases | Percentage         |
| 1                                                                                                                                                           | A city                                                                                | 225   | <div></div> 4.8%   |
| 2                                                                                                                                                           | A suburb or the outskirts of a city                                                   | 185   | <div></div> 3.9%   |
| 3                                                                                                                                                           | A small or medium sized town                                                          | 240   | <div></div> 5.1%   |
| 4                                                                                                                                                           | A village                                                                             | 137   | <div></div> 2.9%   |
| 5                                                                                                                                                           | A sparsely inhabited area                                                             | 103   | <div></div> 2.2%   |
| 97                                                                                                                                                          | No answer                                                                             | 81    | <div></div> 1.7%   |
| 98                                                                                                                                                          | Not asked                                                                             | 3718  | <div></div> 79.3%  |
| Warning: these figures indicate the number of cases found in the data file. They cannot be interpreted as summary statistics of the population of interest. |                                                                                       |       |                    |
| # r7ran24: [All respondents are randomized. ]                                                                                                               |                                                                                       |       |                    |
| Information                                                                                                                                                 | [Type= discrete] [Format=numeric] [Range= 1-6] [Missing=*]                            |       |                    |
| Statistics [NW/ W]                                                                                                                                          | [Valid=4581 /-] [Invalid=108 /-]                                                      |       |                    |
| Interviewer's instructions                                                                                                                                  | [All respondents are randomized. ]                                                    |       |                    |



| # r7ran24: [All respondents are randomized. ]                                                                                                               |                                                                                                                                                                              |       |                   |
|-------------------------------------------------------------------------------------------------------------------------------------------------------------|------------------------------------------------------------------------------------------------------------------------------------------------------------------------------|-------|-------------------|
| Value                                                                                                                                                       | Label                                                                                                                                                                        | Cases | Percentage        |
| 1                                                                                                                                                           | 1                                                                                                                                                                            | 789   | <div></div> 17.2% |
| 2                                                                                                                                                           | 2                                                                                                                                                                            | 778   | <div></div> 17.0% |
| 3                                                                                                                                                           | 3                                                                                                                                                                            | 748   | <div></div> 16.3% |
| 4                                                                                                                                                           | 4                                                                                                                                                                            | 762   | <div></div> 16.6% |
| 5                                                                                                                                                           | 5                                                                                                                                                                            | 743   | <div></div> 16.2% |
| 6                                                                                                                                                           | 6                                                                                                                                                                            | 761   | <div></div> 16.6% |
| Sysmiss                                                                                                                                                     |                                                                                                                                                                              | 108   |                   |
| Warning: these figures indicate the number of cases found in the data file. They cannot be interpreted as summary statistics of the population of interest. |                                                                                                                                                                              |       |                   |
| # r7ran24_1: [Randomizes if ran24=1. ]                                                                                                                      |                                                                                                                                                                              |       |                   |
| Information                                                                                                                                                 | [Type= discrete] [Format=numeric] [Range= 1-3] [Missing=*]                                                                                                                   |       |                   |
| Statistics [NW/ W]                                                                                                                                          | [Valid=789 /-] [Invalid=3900 /-]                                                                                                                                             |       |                   |
| Interviewer's instructions                                                                                                                                  | [Randomizes if ran24=1. ]                                                                                                                                                    |       |                   |
| Value                                                                                                                                                       | Label                                                                                                                                                                        | Cases | Percentage        |
| 1                                                                                                                                                           | 1                                                                                                                                                                            | 250   | <div></div> 31.7% |
| 2                                                                                                                                                           | 2                                                                                                                                                                            | 259   | <div></div> 32.8% |
| 3                                                                                                                                                           | 3                                                                                                                                                                            | 280   | <div></div> 35.5% |
| Sysmiss                                                                                                                                                     |                                                                                                                                                                              | 3900  |                   |
| Warning: these figures indicate the number of cases found in the data file. They cannot be interpreted as summary statistics of the population of interest. |                                                                                                                                                                              |       |                   |
| # ocr7matc1: Agree with how many of these three statements: Increase assistance to the poor, decrease tax on fuel, allow large corporations to pollute      |                                                                                                                                                                              |       |                   |
| Information                                                                                                                                                 | [Type= discrete] [Format=numeric] [Range= 1-4] [Missing=*]                                                                                                                   |       |                   |
| Statistics [NW/ W]                                                                                                                                          | [Valid=4689 /-] [Invalid=0 /-]                                                                                                                                               |       |                   |
| Pre-question                                                                                                                                                | Of the following three statements, how many of them do you agree with? We don't want to know which statements, just how many.                                                |       |                   |
| Literal question                                                                                                                                            | Norway should increase in assistance to the poor<br>Norway should decrease the tax on petrol and diesel<br>Norway should allow large corporations to pollute the environment |       |                   |
| Interviewer's instructions                                                                                                                                  | [Asked if ran24=1 AND ran24_1=1. ]                                                                                                                                           |       |                   |
| Notes                                                                                                                                                       | Hvor mange av de tre følgende påstandene er du enig i? Vi ønsker ikke å vite hvilke påstander, bare hvor mange.Norg                                                          |       |                   |
| Value                                                                                                                                                       | Label                                                                                                                                                                        | Cases | Percentage        |
| 1                                                                                                                                                           | 0                                                                                                                                                                            | 41    | <div></div> 0.9%  |
| 2                                                                                                                                                           | 1                                                                                                                                                                            | 167   | <div></div> 3.6%  |
| 3                                                                                                                                                           | 2                                                                                                                                                                            | 37    | <div></div> 0.8%  |
| 4                                                                                                                                                           | 3                                                                                                                                                                            | 3     | <div></div> 0.1%  |
| 97                                                                                                                                                          | No answer                                                                                                                                                                    | 2     | <div></div> 0.0%  |
| 98                                                                                                                                                          | Not asked                                                                                                                                                                    | 4439  | <div></div> 94.7% |
| Warning: these figures indicate the number of cases found in the data file. They cannot be interpreted as summary statistics of the population of interest. |                                                                                                                                                                              |       |                   |
| # ocr7matc1a: Should Norway allow people from Muslim countries to come and live here?                                                                       |                                                                                                                                                                              |       |                   |
| Information                                                                                                                                                 | [Type= discrete] [Format=numeric] [Range= 1-2] [Missing=*]                                                                                                                   |       |                   |
| Statistics [NW/ W]                                                                                                                                          | [Valid=4689 /-] [Invalid=0 /-]                                                                                                                                               |       |                   |
| Literal question                                                                                                                                            | Do you think Norway should allow people from Muslim countries to come and live here?                                                                                         |       |                   |
| Interviewer's instructions                                                                                                                                  | [Asked if ran24=1 AND ran24_1=1. ]                                                                                                                                           |       |                   |

| # ocr7matc1a: Should Norway allow people from Muslim countries to come and live here?                                                                              |                                                                                                                                                                              |       |                              |
|--------------------------------------------------------------------------------------------------------------------------------------------------------------------|------------------------------------------------------------------------------------------------------------------------------------------------------------------------------|-------|------------------------------|
| Value                                                                                                                                                              | Label                                                                                                                                                                        | Cases | Percentage                   |
| 1                                                                                                                                                                  | Allow to come and live here                                                                                                                                                  | 159   | <div><div></div></div> 3.4%  |
| 2                                                                                                                                                                  | Do not allow to come and live here                                                                                                                                           | 80    | <div><div></div></div> 1.7%  |
| 97                                                                                                                                                                 | No answer                                                                                                                                                                    | 11    | <div><div></div></div> 0.2%  |
| 98                                                                                                                                                                 | Not asked                                                                                                                                                                    | 4439  | <div><div></div></div> 94.7% |
| <i>Warning: these figures indicate the number of cases found in the data file. They cannot be interpreted as summary statistics of the population of interest.</i> |                                                                                                                                                                              |       |                              |
| # ocr7matc2: Agree with how many of these three statements: Increase assistance to the poor, decrease tax on fuel, allow large corporations to pollute             |                                                                                                                                                                              |       |                              |
| Information                                                                                                                                                        | [Type= discrete] [Format=numeric] [Range= 1-4] [Missing=*]                                                                                                                   |       |                              |
| Statistics [NW/ W]                                                                                                                                                 | [Valid=4689 /-] [Invalid=0 /-]                                                                                                                                               |       |                              |
| Pre-question                                                                                                                                                       | Of the following three statements, how many of them do you agree with? We don't want to know which statements, just how many.                                                |       |                              |
| Literal question                                                                                                                                                   | Norway should increase in assistance to the poor<br>Norway should decrease the tax on petrol and diesel<br>Norway should allow large corporations to pollute the environment |       |                              |
| Interviewer's instructions                                                                                                                                         | [Asked if ran24=2. ]                                                                                                                                                         |       |                              |
| Notes                                                                                                                                                              | Hvor mange av de tre følgende påstandene er du enig i? Vi ønsker ikke å vite hvilke påstander, bare hvor mange. N                                                            |       |                              |
| Value                                                                                                                                                              | Label                                                                                                                                                                        | Cases | Percentage                   |
| 1                                                                                                                                                                  | 0                                                                                                                                                                            | 174   | <div><div></div></div> 3.7%  |
| 2                                                                                                                                                                  | 1                                                                                                                                                                            | 462   | <div><div></div></div> 9.9%  |
| 3                                                                                                                                                                  | 2                                                                                                                                                                            | 121   | <div><div></div></div> 2.6%  |
| 4                                                                                                                                                                  | 3                                                                                                                                                                            | 11    | <div><div></div></div> 0.2%  |
| 97                                                                                                                                                                 | No answer                                                                                                                                                                    | 10    | <div><div></div></div> 0.2%  |
| 98                                                                                                                                                                 | Not asked                                                                                                                                                                    | 3911  | <div><div></div></div> 83.4% |
| <i>Warning: these figures indicate the number of cases found in the data file. They cannot be interpreted as summary statistics of the population of interest.</i> |                                                                                                                                                                              |       |                              |
| # ocr7matc2a: Should Norway allow people from Eastern European countries to come and live here?                                                                    |                                                                                                                                                                              |       |                              |
| Information                                                                                                                                                        | [Type= discrete] [Format=numeric] [Range= 1-2] [Missing=*]                                                                                                                   |       |                              |
| Statistics [NW/ W]                                                                                                                                                 | [Valid=4689 /-] [Invalid=0 /-]                                                                                                                                               |       |                              |
| Literal question                                                                                                                                                   | Do you think Norway should allow people from Eastern European countries to come and live here?                                                                               |       |                              |
| Interviewer's instructions                                                                                                                                         | [Asked if ran24=2. ]                                                                                                                                                         |       |                              |
| Value                                                                                                                                                              | Label                                                                                                                                                                        | Cases | Percentage                   |
| 1                                                                                                                                                                  | Allow to come and live here                                                                                                                                                  | 428   | <div><div></div></div> 9.1%  |
| 2                                                                                                                                                                  | Do not allow to come and live here                                                                                                                                           | 316   | <div><div></div></div> 6.7%  |
| 97                                                                                                                                                                 | No answer                                                                                                                                                                    | 34    | <div><div></div></div> 0.7%  |
| 98                                                                                                                                                                 | Not asked                                                                                                                                                                    | 3911  | <div><div></div></div> 83.4% |
| <i>Warning: these figures indicate the number of cases found in the data file. They cannot be interpreted as summary statistics of the population of interest.</i> |                                                                                                                                                                              |       |                              |
| # ocr7matc3: Agree with how many of these three statements: Increase assistance to the poor, decrease tax on fuel, allow large corporations to pollute             |                                                                                                                                                                              |       |                              |
| Information                                                                                                                                                        | [Type= discrete] [Format=numeric] [Range= 1-4] [Missing=*]                                                                                                                   |       |                              |
| Statistics [NW/ W]                                                                                                                                                 | [Valid=4689 /-] [Invalid=0 /-]                                                                                                                                               |       |                              |
| Pre-question                                                                                                                                                       | Of the following three statements, how many of them do you agree with? We don't want to know which statements, just how many.                                                |       |                              |
| Literal question                                                                                                                                                   | Norway should increase in assistance to the poor<br>Norway should decrease the tax on petrol and diesel<br>Norway should allow large corporations to pollute the environment |       |                              |

|                                                                                                                                                             |                                                                                                                                                                              |       |            |
|-------------------------------------------------------------------------------------------------------------------------------------------------------------|------------------------------------------------------------------------------------------------------------------------------------------------------------------------------|-------|------------|
| # ocr7matc3: Agree with how many of these three statements: Increase assistance to the poor, decrease tax on fuel, allow large corporations to pollute      |                                                                                                                                                                              |       |            |
| Interviewer's instructions                                                                                                                                  | [Asked if ran24=1 AND ran24_1=2. ]                                                                                                                                           |       |            |
| Notes                                                                                                                                                       | Hvor mange av de tre følgende påstandene er du enig i? Vi ønsker ikke å vite hvilke påstander, bare hvor mange. No                                                           |       |            |
| Value                                                                                                                                                       | Label                                                                                                                                                                        | Cases | Percentage |
| 1                                                                                                                                                           | 0                                                                                                                                                                            | 48    | 1.0%       |
| 2                                                                                                                                                           | 1                                                                                                                                                                            | 164   | 3.5%       |
| 3                                                                                                                                                           | 2                                                                                                                                                                            | 40    | 0.9%       |
| 4                                                                                                                                                           | 3                                                                                                                                                                            | 4     | 0.1%       |
| 97                                                                                                                                                          | No answer                                                                                                                                                                    | 3     | 0.1%       |
| 98                                                                                                                                                          | Not asked                                                                                                                                                                    | 4430  | 94.5%      |
| Warning: these figures indicate the number of cases found in the data file. They cannot be interpreted as summary statistics of the population of interest. |                                                                                                                                                                              |       |            |
| # ocr7matc3a: Should Norway allow immigrants from Muslim countries to come and live here?                                                                   |                                                                                                                                                                              |       |            |
| Information                                                                                                                                                 | [Type= discrete] [Format=numeric] [Range= 1-2] [Missing=*]                                                                                                                   |       |            |
| Statistics [NW/ W]                                                                                                                                          | [Valid=4689 /-] [Invalid=0 /-]                                                                                                                                               |       |            |
| Literal question                                                                                                                                            | Do you think Norway should allow immigrants from Muslim countries to come and live here?                                                                                     |       |            |
| Interviewer's instructions                                                                                                                                  | [Asked if ran24=1 AND ran24_1=2. ]                                                                                                                                           |       |            |
| Notes                                                                                                                                                       | Synes du Norge bør la immigranter fra muslimske land komme for å bosette seg her?                                                                                            |       |            |
| Value                                                                                                                                                       | Label                                                                                                                                                                        | Cases | Percentage |
| 1                                                                                                                                                           | Allow to come and live here                                                                                                                                                  | 157   | 3.3%       |
| 2                                                                                                                                                           | Do not allow to come and live here                                                                                                                                           | 88    | 1.9%       |
| 97                                                                                                                                                          | No answer                                                                                                                                                                    | 14    | 0.3%       |
| 98                                                                                                                                                          | Not asked                                                                                                                                                                    | 4430  | 94.5%      |
| Warning: these figures indicate the number of cases found in the data file. They cannot be interpreted as summary statistics of the population of interest. |                                                                                                                                                                              |       |            |
| # ocr7matc4: Agree with how many of these three statements: Increase assistance to the poor, decrease tax on fuel, allow large corporations to pollute      |                                                                                                                                                                              |       |            |
| Information                                                                                                                                                 | [Type= discrete] [Format=numeric] [Range= 1-4] [Missing=*]                                                                                                                   |       |            |
| Statistics [NW/ W]                                                                                                                                          | [Valid=4689 /-] [Invalid=0 /-]                                                                                                                                               |       |            |
| Pre-question                                                                                                                                                | Of the following three statements, how many of them do you agree with? We don't want to know which statements, just how many.                                                |       |            |
| Literal question                                                                                                                                            | Norway should increase in assistance to the poor<br>Norway should decrease the tax on petrol and diesel<br>Norway should allow large corporations to pollute the environment |       |            |
| Interviewer's instructions                                                                                                                                  | [Asked if ran24=1 AND ran24_1=3. ]                                                                                                                                           |       |            |
| Notes                                                                                                                                                       | Hvor mange av de tre følgende påstandene er du enig i? Vi ønsker ikke å vite hvilke påstander, bare hvor mange. No                                                           |       |            |
| Value                                                                                                                                                       | Label                                                                                                                                                                        | Cases | Percentage |
| 1                                                                                                                                                           | 0                                                                                                                                                                            | 44    | 0.9%       |
| 2                                                                                                                                                           | 1                                                                                                                                                                            | 191   | 4.1%       |
| 3                                                                                                                                                           | 2                                                                                                                                                                            | 43    | 0.9%       |
| 4                                                                                                                                                           | 3                                                                                                                                                                            | 1     | 0.0%       |
| 97                                                                                                                                                          | No answer                                                                                                                                                                    | 1     | 0.0%       |
| 98                                                                                                                                                          | Not asked                                                                                                                                                                    | 4409  | 94.0%      |
| Warning: these figures indicate the number of cases found in the data file. They cannot be interpreted as summary statistics of the population of interest. |                                                                                                                                                                              |       |            |
| # ocr7matc4a: Should Norway allow refugees from Muslim countries to come and live here?                                                                     |                                                                                                                                                                              |       |            |
| Information                                                                                                                                                 | [Type= discrete] [Format=numeric] [Range= 1-2] [Missing=*]                                                                                                                   |       |            |

|                                                                                                                                                                                                         |                                                                                                                                                                                                                                                                  |       |            |
|---------------------------------------------------------------------------------------------------------------------------------------------------------------------------------------------------------|------------------------------------------------------------------------------------------------------------------------------------------------------------------------------------------------------------------------------------------------------------------|-------|------------|
| # ocr7matc4a: Should Norway allow refugees from Muslim countries to come and live here?                                                                                                                 |                                                                                                                                                                                                                                                                  |       |            |
| Statistics [NW/ W]                                                                                                                                                                                      | [Valid=4689 /-] [Invalid=0 /-]                                                                                                                                                                                                                                   |       |            |
| Literal question                                                                                                                                                                                        | Do you think Norway should allow refugees from Muslim countries to come and live here?                                                                                                                                                                           |       |            |
| Interviewer's instructions                                                                                                                                                                              | [Asked if ran24=1 AND ran24_1=3. ]                                                                                                                                                                                                                               |       |            |
| Notes                                                                                                                                                                                                   | Synes du Norge bør la flyktninger fra muslimske land komme for å bosette seg her?                                                                                                                                                                                |       |            |
| Value                                                                                                                                                                                                   | Label                                                                                                                                                                                                                                                            | Cases | Percentage |
| 1                                                                                                                                                                                                       | Allow to come and live here                                                                                                                                                                                                                                      | 186   | 4.0%       |
| 2                                                                                                                                                                                                       | Do not allow to come and live here                                                                                                                                                                                                                               | 89    | 1.9%       |
| 97                                                                                                                                                                                                      | No answer                                                                                                                                                                                                                                                        | 5     | 0.1%       |
| 98                                                                                                                                                                                                      | Not asked                                                                                                                                                                                                                                                        | 4409  | 94.0%      |
| Warning: these figures indicate the number of cases found in the data file. They cannot be interpreted as summary statistics of the population of interest.                                             |                                                                                                                                                                                                                                                                  |       |            |
| # ocr7matt1: Agree with how many of these four statements: Increase assistance to the poor, decrease tax on fuel, allow large corporations to pollute, people from Muslim countries live here           |                                                                                                                                                                                                                                                                  |       |            |
| Information                                                                                                                                                                                             | [Type= discrete] [Format=numeric] [Range= 1-5] [Missing=*]                                                                                                                                                                                                       |       |            |
| Statistics [NW/ W]                                                                                                                                                                                      | [Valid=4689 /-] [Invalid=0 /-]                                                                                                                                                                                                                                   |       |            |
| Pre-question                                                                                                                                                                                            | Of the following four statements, how many of them do you agree with? We don't want to know which statements, just how many.                                                                                                                                     |       |            |
| Literal question                                                                                                                                                                                        | Norway should increase in assistance to the poor<br>Norway should decrease the tax on petrol and diesel<br>Norway should allow large corporations to pollute the environment<br>Norway should allow people from Muslim countries to come and live here           |       |            |
| Interviewer's instructions                                                                                                                                                                              | [Asked if ran24=3. ]                                                                                                                                                                                                                                             |       |            |
| Notes                                                                                                                                                                                                   | Hvor mange av de fire følgende påstandene er du enig i? Vi ønsker ikke å vite hvilke påstander, bare hvor mange. N                                                                                                                                               |       |            |
| Value                                                                                                                                                                                                   | Label                                                                                                                                                                                                                                                            | Cases | Percentage |
| 1                                                                                                                                                                                                       | 0                                                                                                                                                                                                                                                                | 73    | 1.6%       |
| 2                                                                                                                                                                                                       | 1                                                                                                                                                                                                                                                                | 288   | 6.1%       |
| 3                                                                                                                                                                                                       | 2                                                                                                                                                                                                                                                                | 314   | 6.7%       |
| 4                                                                                                                                                                                                       | 3                                                                                                                                                                                                                                                                | 47    | 1.0%       |
| 5                                                                                                                                                                                                       | 4                                                                                                                                                                                                                                                                | 10    | 0.2%       |
| 97                                                                                                                                                                                                      | No answer                                                                                                                                                                                                                                                        | 16    | 0.3%       |
| 98                                                                                                                                                                                                      | Not asked                                                                                                                                                                                                                                                        | 3941  | 84.0%      |
| Warning: these figures indicate the number of cases found in the data file. They cannot be interpreted as summary statistics of the population of interest.                                             |                                                                                                                                                                                                                                                                  |       |            |
| # ocr7matt2: Agree with how many of these four statements: Increase assistance to the poor, decrease tax on fuel, allow large corporations to pollute, people from Eastern European countries live here |                                                                                                                                                                                                                                                                  |       |            |
| Information                                                                                                                                                                                             | [Type= discrete] [Format=numeric] [Range= 1-5] [Missing=*]                                                                                                                                                                                                       |       |            |
| Statistics [NW/ W]                                                                                                                                                                                      | [Valid=4689 /-] [Invalid=0 /-]                                                                                                                                                                                                                                   |       |            |
| Pre-question                                                                                                                                                                                            | Of the following four statements, how many of them do you agree with? We don't want to know which statements, just how many.                                                                                                                                     |       |            |
| Literal question                                                                                                                                                                                        | Norway should increase in assistance to the poor<br>Norway should decrease the tax on petrol and diesel<br>Norway should allow large corporations to pollute the environment<br>Norway should allow people from Eastern European countries to come and live here |       |            |
| Interviewer's instructions                                                                                                                                                                              | [Asked if ran24=4. ]                                                                                                                                                                                                                                             |       |            |
| Notes                                                                                                                                                                                                   | Hvor mange av de fire følgende påstandene er du enig i? Vi ønsker ikke å vite hvilke påstander, bare hvor mange. N                                                                                                                                               |       |            |
| Value                                                                                                                                                                                                   | Label                                                                                                                                                                                                                                                            | Cases | Percentage |
| 1                                                                                                                                                                                                       | 0                                                                                                                                                                                                                                                                | 121   | 2.6%       |
| 2                                                                                                                                                                                                       | 1                                                                                                                                                                                                                                                                | 338   | 7.2%       |

**# ocr7matt2: Agree with how many of these four statements: Increase assistance to the poor, decrease tax on fuel, allow large corporations to pollute, people from Eastern European countries live here**

| Value | Label     | Cases | Percentage |
|-------|-----------|-------|------------|
| 3     | 2         | 263   | 5.6%       |
| 4     | 3         | 30    | 0.6%       |
| 5     | 4         | 0     |            |
| 97    | No answer | 10    | 0.2%       |
| 98    | Not asked | 3927  | 83.7%      |

Warning: these figures indicate the number of cases found in the data file. They cannot be interpreted as summary statistics of the population of interest.

**# ocr7matt3: Agree with how many of these four statements: Increase assistance to the poor, decrease tax on fuel, allow large corporations to pollute, immigrants from Muslim countries live here**

|                                   |                                                                                                                                                                                                                                                            |
|-----------------------------------|------------------------------------------------------------------------------------------------------------------------------------------------------------------------------------------------------------------------------------------------------------|
| <b>Information</b>                | [Type= discrete] [Format=numeric] [Range= 1-5] [Missing=*]                                                                                                                                                                                                 |
| <b>Statistics [NW/ W]</b>         | [Valid=4689 /-] [Invalid=0 /-]                                                                                                                                                                                                                             |
| <b>Pre-question</b>               | Of the following four statements, how many of them do you agree with? We don't want to know which statements, just how many.                                                                                                                               |
| <b>Literal question</b>           | Norway should increase in assistance to the poor<br>Norway should decrease the tax on petrol and diesel<br>Norway should allow large corporations to pollute the environment<br>Norway should allow immigrants from Muslim countries to come and live here |
| <b>Interviewer's instructions</b> | [Asked if ran24=5. ]                                                                                                                                                                                                                                       |
| <b>Notes</b>                      | Hvor mange av de fire følgende påstandene er du enig i? Vi ønsker ikke å vite hvilke påstander, bare hvor mange. N                                                                                                                                         |

| Value | Label     | Cases | Percentage |
|-------|-----------|-------|------------|
| 1     | 0         | 103   | 2.2%       |
| 2     | 1         | 312   | 6.7%       |
| 3     | 2         | 283   | 6.0%       |
| 4     | 3         | 30    | 0.6%       |
| 5     | 4         | 4     | 0.1%       |
| 97    | No answer | 11    | 0.2%       |
| 98    | Not asked | 3946  | 84.2%      |

Warning: these figures indicate the number of cases found in the data file. They cannot be interpreted as summary statistics of the population of interest.

**# ocr7matt4: Agree with how many of these four statements: Increase assistance to the poor, decrease tax on fuel, allow large corporations to pollute, refugees from Muslim countries live here**

|                                   |                                                                                                                                                                                                                                                          |
|-----------------------------------|----------------------------------------------------------------------------------------------------------------------------------------------------------------------------------------------------------------------------------------------------------|
| <b>Information</b>                | [Type= discrete] [Format=numeric] [Range= 1-5] [Missing=*]                                                                                                                                                                                               |
| <b>Statistics [NW/ W]</b>         | [Valid=4689 /-] [Invalid=0 /-]                                                                                                                                                                                                                           |
| <b>Pre-question</b>               | Of the following four statements, how many of them do you agree with? We don't want to know which statements, just how many.                                                                                                                             |
| <b>Literal question</b>           | Norway should increase in assistance to the poor<br>Norway should decrease the tax on petrol and diesel<br>Norway should allow large corporations to pollute the environment<br>Norway should allow refugees from Muslim countries to come and live here |
| <b>Interviewer's instructions</b> | [Asked if ran24=6. ]                                                                                                                                                                                                                                     |
| <b>Notes</b>                      | Hvor mange av de fire følgende påstandene er du enig i? Vi ønsker ikke å vite hvilke påstander, bare hvor mange. N                                                                                                                                       |

| Value | Label | Cases | Percentage |
|-------|-------|-------|------------|
| 1     | 0     | 89    | 1.9%       |
| 2     | 1     | 281   | 6.0%       |
| 3     | 2     | 346   | 7.4%       |
| 4     | 3     | 32    | 0.7%       |

**# ocr7matt4: Agree with how many of these four statements: Increase assistance to the poor, decrease tax on fuel, allow large corporations to pollute, refugees from Muslim countries live here**

| Value | Label     | Cases | Percentage |
|-------|-----------|-------|------------|
| 5     | 4         | 10    | 0.2%       |
| 97    | No answer | 3     | 0.1%       |
| 98    | Not asked | 3928  | 83.8%      |

*Warning: these figures indicate the number of cases found in the data file. They cannot be interpreted as summary statistics of the population of interest.*

**# r7ran25: [Randomizes if u=3]**

|                                   |                                                            |
|-----------------------------------|------------------------------------------------------------|
| <b>Information</b>                | [Type= discrete] [Format=numeric] [Range= 1-5] [Missing=*] |
| <b>Statistics [NW/ W]</b>         | [Valid=1078 /-] [Invalid=3611 /-]                          |
| <b>Interviewer's instructions</b> | [Randomizes if u=3]                                        |

| Value   | Label | Cases | Percentage |
|---------|-------|-------|------------|
| 1       | 1     | 207   | 19.2%      |
| 2       | 2     | 237   | 22.0%      |
| 3       | 3     | 211   | 19.6%      |
| 4       | 4     | 213   | 19.8%      |
| 5       | 5     | 210   | 19.5%      |
| Sysmiss |       | 3611  |            |

*Warning: these figures indicate the number of cases found in the data file. They cannot be interpreted as summary statistics of the population of interest.*

**# r7ran26: [Randomizes if u=3]**

|                                   |                                                            |
|-----------------------------------|------------------------------------------------------------|
| <b>Information</b>                | [Type= discrete] [Format=numeric] [Range= 1-5] [Missing=*] |
| <b>Statistics [NW/ W]</b>         | [Valid=1078 /-] [Invalid=3611 /-]                          |
| <b>Interviewer's instructions</b> | [Randomizes if u=3]                                        |

| Value   | Label | Cases | Percentage |
|---------|-------|-------|------------|
| 1       | 1     | 212   | 19.7%      |
| 2       | 2     | 216   | 20.0%      |
| 3       | 3     | 197   | 18.3%      |
| 4       | 4     | 220   | 20.4%      |
| 5       | 5     | 233   | 21.6%      |
| Sysmiss |       | 3611  |            |

*Warning: these figures indicate the number of cases found in the data file. They cannot be interpreted as summary statistics of the population of interest.*

**# r7ran27: [Randomizes if u=3]**

|                                   |                                                            |
|-----------------------------------|------------------------------------------------------------|
| <b>Information</b>                | [Type= discrete] [Format=numeric] [Range= 1-5] [Missing=*] |
| <b>Statistics [NW/ W]</b>         | [Valid=1078 /-] [Invalid=3611 /-]                          |
| <b>Interviewer's instructions</b> | [Randomizes if u=3]                                        |

| Value   | Label | Cases | Percentage |
|---------|-------|-------|------------|
| 1       | 1     | 202   | 18.7%      |
| 2       | 2     | 209   | 19.4%      |
| 3       | 3     | 235   | 21.8%      |
| 4       | 4     | 231   | 21.4%      |
| 5       | 5     | 201   | 18.6%      |
| Sysmiss |       | 3611  |            |

*Warning: these figures indicate the number of cases found in the data file. They cannot be interpreted as summary statistics of the population of interest.*

|                                                                                                                                                             |                                                                                                                           |       |                              |
|-------------------------------------------------------------------------------------------------------------------------------------------------------------|---------------------------------------------------------------------------------------------------------------------------|-------|------------------------------|
| # r7ran28: [Randomizes if u=3]                                                                                                                              |                                                                                                                           |       |                              |
| Information                                                                                                                                                 | [Type= discrete] [Format=numeric] [Range= 1-5] [Missing=*]                                                                |       |                              |
| Statistics [NW/ W]                                                                                                                                          | [Valid=1078 /-] [Invalid=3611 /-]                                                                                         |       |                              |
| Interviewer's instructions                                                                                                                                  | [Randomizes if u=3]                                                                                                       |       |                              |
| Value                                                                                                                                                       | Label                                                                                                                     | Cases | Percentage                   |
| 1                                                                                                                                                           | 1                                                                                                                         | 233   | <div><div></div></div> 21.6% |
| 2                                                                                                                                                           | 2                                                                                                                         | 205   | <div><div></div></div> 19.0% |
| 3                                                                                                                                                           | 3                                                                                                                         | 203   | <div><div></div></div> 18.8% |
| 4                                                                                                                                                           | 4                                                                                                                         | 213   | <div><div></div></div> 19.8% |
| 5                                                                                                                                                           | 5                                                                                                                         | 224   | <div><div></div></div> 20.8% |
| Sysmiss                                                                                                                                                     |                                                                                                                           | 3611  |                              |
| Warning: these figures indicate the number of cases found in the data file. They cannot be interpreted as summary statistics of the population of interest. |                                                                                                                           |       |                              |
| # r7ran29: [Randomizes if u=3]                                                                                                                              |                                                                                                                           |       |                              |
| Information                                                                                                                                                 | [Type= discrete] [Format=numeric] [Range= 1-5] [Missing=*]                                                                |       |                              |
| Statistics [NW/ W]                                                                                                                                          | [Valid=1078 /-] [Invalid=3611 /-]                                                                                         |       |                              |
| Interviewer's instructions                                                                                                                                  | [Randomizes if u=3]                                                                                                       |       |                              |
| Value                                                                                                                                                       | Label                                                                                                                     | Cases | Percentage                   |
| 1                                                                                                                                                           | 1                                                                                                                         | 223   | <div><div></div></div> 20.7% |
| 2                                                                                                                                                           | 2                                                                                                                         | 187   | <div><div></div></div> 17.3% |
| 3                                                                                                                                                           | 3                                                                                                                         | 229   | <div><div></div></div> 21.2% |
| 4                                                                                                                                                           | 4                                                                                                                         | 230   | <div><div></div></div> 21.3% |
| 5                                                                                                                                                           | 5                                                                                                                         | 209   | <div><div></div></div> 19.4% |
| Sysmiss                                                                                                                                                     |                                                                                                                           | 3611  |                              |
| Warning: these figures indicate the number of cases found in the data file. They cannot be interpreted as summary statistics of the population of interest. |                                                                                                                           |       |                              |
| # r7ran30: [Randomizes if u=3]                                                                                                                              |                                                                                                                           |       |                              |
| Information                                                                                                                                                 | [Type= discrete] [Format=numeric] [Range= 1-5] [Missing=*]                                                                |       |                              |
| Statistics [NW/ W]                                                                                                                                          | [Valid=1078 /-] [Invalid=3611 /-]                                                                                         |       |                              |
| Interviewer's instructions                                                                                                                                  | [Randomizes if u=3]                                                                                                       |       |                              |
| Value                                                                                                                                                       | Label                                                                                                                     | Cases | Percentage                   |
| 1                                                                                                                                                           | 1                                                                                                                         | 199   | <div><div></div></div> 18.5% |
| 2                                                                                                                                                           | 2                                                                                                                         | 209   | <div><div></div></div> 19.4% |
| 3                                                                                                                                                           | 3                                                                                                                         | 224   | <div><div></div></div> 20.8% |
| 4                                                                                                                                                           | 4                                                                                                                         | 214   | <div><div></div></div> 19.9% |
| 5                                                                                                                                                           | 5                                                                                                                         | 232   | <div><div></div></div> 21.5% |
| Sysmiss                                                                                                                                                     |                                                                                                                           | 3611  |                              |
| Warning: these figures indicate the number of cases found in the data file. They cannot be interpreted as summary statistics of the population of interest. |                                                                                                                           |       |                              |
| # ocr7marinovel1_1: Appropriate to investigate Gazprom                                                                                                      |                                                                                                                           |       |                              |
| Information                                                                                                                                                 | [Type= discrete] [Format=numeric] [Range= 1-7] [Missing=*]                                                                |       |                              |
| Statistics [NW/ W]                                                                                                                                          | [Valid=4689 /-] [Invalid=0 /-]                                                                                            |       |                              |
| Pre-question                                                                                                                                                | In April 2015, the European Union opened an investigation into the business practices of Gazprom.                         |       |                              |
| Literal question                                                                                                                                            | In your opinion, is this investigation into the Russian energy giant Gazprom appropriate?                                 |       |                              |
| Interviewer's instructions                                                                                                                                  | [Asked if u=3 and ran25=1. ]                                                                                              |       |                              |
| Notes                                                                                                                                                       | I april 2015 innledet EU etterforskning av Gazproms forretningspraksis. Mener du at denne etterforskningen av den russisk |       |                              |

| # ocr7marinove1_1: Appropriate to investigate Gazprom                                                                                                       |                                                                                                                                                                                                                                            |       |            |
|-------------------------------------------------------------------------------------------------------------------------------------------------------------|--------------------------------------------------------------------------------------------------------------------------------------------------------------------------------------------------------------------------------------------|-------|------------|
| Value                                                                                                                                                       | Label                                                                                                                                                                                                                                      | Cases | Percentage |
| 1                                                                                                                                                           | Very appropriate                                                                                                                                                                                                                           | 67    | 1.4%       |
| 2                                                                                                                                                           | Somewhat appropriate                                                                                                                                                                                                                       | 33    | 0.7%       |
| 3                                                                                                                                                           | Neither appropriate, nor inappropriate                                                                                                                                                                                                     | 15    | 0.3%       |
| 4                                                                                                                                                           | Somewhat inappropriate                                                                                                                                                                                                                     | 5     | 0.1%       |
| 5                                                                                                                                                           | Not at all appropriate                                                                                                                                                                                                                     | 2     | 0.0%       |
| 6                                                                                                                                                           | Do not know                                                                                                                                                                                                                                | 81    | 1.7%       |
| 7                                                                                                                                                           | Not specified                                                                                                                                                                                                                              | 1     | 0.0%       |
| 97                                                                                                                                                          | No answer                                                                                                                                                                                                                                  | 3     | 0.1%       |
| 98                                                                                                                                                          | Not asked                                                                                                                                                                                                                                  | 4482  | 95.6%      |
| Warning: these figures indicate the number of cases found in the data file. They cannot be interpreted as summary statistics of the population of interest. |                                                                                                                                                                                                                                            |       |            |
| # ocr7marinove1_2: Appropriate to investigate Gazprom: Put the business under pressure                                                                      |                                                                                                                                                                                                                                            |       |            |
| Information                                                                                                                                                 | [Type= discrete] [Format=numeric] [Range= 1-7] [Missing=*]                                                                                                                                                                                 |       |            |
| Statistics [NW/ W]                                                                                                                                          | [Valid=4689 /-] [Invalid=0 /-]                                                                                                                                                                                                             |       |            |
| Pre-question                                                                                                                                                | In April 2015, the European Union opened an investigation into the business practices of Gazprom. This put the Russian energy group under pressure and gave its European competitors an advantage.                                         |       |            |
| Literal question                                                                                                                                            | In your opinion, is this investigation into the Russian energy giant Gazprom appropriate?                                                                                                                                                  |       |            |
| Interviewer's instructions                                                                                                                                  | [Asked if u=3 and ran25=2. ]                                                                                                                                                                                                               |       |            |
| Notes                                                                                                                                                       | I april 2015 innledet EU etterforskning av Gazproms forretningspraksis. Dette satt det russiske energikonsernet under pr                                                                                                                   |       |            |
| Value                                                                                                                                                       | Label                                                                                                                                                                                                                                      | Cases | Percentage |
| 1                                                                                                                                                           | Very appropriate                                                                                                                                                                                                                           | 60    | 1.3%       |
| 2                                                                                                                                                           | Somewhat appropriate                                                                                                                                                                                                                       | 51    | 1.1%       |
| 3                                                                                                                                                           | Neither appropriate, nor inappropriate                                                                                                                                                                                                     | 27    | 0.6%       |
| 4                                                                                                                                                           | Somewhat inappropriate                                                                                                                                                                                                                     | 7     | 0.1%       |
| 5                                                                                                                                                           | Not at all appropriate                                                                                                                                                                                                                     | 8     | 0.2%       |
| 6                                                                                                                                                           | Do not know                                                                                                                                                                                                                                | 74    | 1.6%       |
| 7                                                                                                                                                           | Not specified                                                                                                                                                                                                                              | 5     | 0.1%       |
| 97                                                                                                                                                          | No answer                                                                                                                                                                                                                                  | 5     | 0.1%       |
| 98                                                                                                                                                          | Not asked                                                                                                                                                                                                                                  | 4452  | 94.9%      |
| Warning: these figures indicate the number of cases found in the data file. They cannot be interpreted as summary statistics of the population of interest. |                                                                                                                                                                                                                                            |       |            |
| # ocr7marinove1_3: Appropriate to investigate Gazprom: Put the business under pressure according to Gazprom/ Russian media                                  |                                                                                                                                                                                                                                            |       |            |
| Information                                                                                                                                                 | [Type= discrete] [Format=numeric] [Range= 1-7] [Missing=*]                                                                                                                                                                                 |       |            |
| Statistics [NW/ W]                                                                                                                                          | [Valid=4689 /-] [Invalid=0 /-]                                                                                                                                                                                                             |       |            |
| Pre-question                                                                                                                                                | In April 2015, the European Union opened an investigation into the business practices of Gazprom. According to Gazprom and Russian media, this put the Russian energy group under pressure and gave its European competitors an advantage. |       |            |
| Literal question                                                                                                                                            | In your opinion, is this investigation into the Russian energy giant Gazprom appropriate?                                                                                                                                                  |       |            |
| Interviewer's instructions                                                                                                                                  | [Asked if u=3 and ran25=3. ]                                                                                                                                                                                                               |       |            |
| Notes                                                                                                                                                       | I april 2015 innledet EU etterforskning av Gazproms forretningspraksis. Ifølge Gazprom og russiske medier satte dette de                                                                                                                   |       |            |
| Value                                                                                                                                                       | Label                                                                                                                                                                                                                                      | Cases | Percentage |
| 1                                                                                                                                                           | Very appropriate                                                                                                                                                                                                                           | 53    | 1.1%       |
| 2                                                                                                                                                           | Somewhat appropriate                                                                                                                                                                                                                       | 44    | 0.9%       |
| 3                                                                                                                                                           | Neither appropriate, nor inappropriate                                                                                                                                                                                                     | 22    | 0.5%       |
| 4                                                                                                                                                           | Somewhat inappropriate                                                                                                                                                                                                                     | 1     | 0.0%       |



### # ocr7marinove1\_3: Appropriate to investigate Gazprom: Put the business under pressure according to Gazprom/ Russian media

| Value | Label                  | Cases | Percentage |
|-------|------------------------|-------|------------|
| 5     | Not at all appropriate | 4     | 0.1%       |
| 6     | Do not know            | 78    | 1.7%       |
| 7     | Not specified          | 2     | 0.0%       |
| 97    | No answer              | 7     | 0.1%       |
| 98    | Not asked              | 4478  | 95.5%      |

Warning: these figures indicate the number of cases found in the data file. They cannot be interpreted as summary statistics of the population of interest.

### # ocr7marinove1\_4: Appropriate to investigate Gazprom: Unfair prices for Eastern European countries

|                                   |                                                                                                                                                                                        |
|-----------------------------------|----------------------------------------------------------------------------------------------------------------------------------------------------------------------------------------|
| <b>Information</b>                | [Type= discrete] [Format=numeric] [Range= 1-7] [Missing=*]                                                                                                                             |
| <b>Statistics [NW/ W]</b>         | [Valid=4689 /-] [Invalid=0 /-]                                                                                                                                                         |
| <b>Pre-question</b>               | In April 2015, the European Union opened an investigation into the business practices of Gazprom. There are indications that Gazprom set unfair prices for Eastern European countries. |
| <b>Literal question</b>           | In your opinion, is this investigation into the Russian energy giant Gazprom appropriate?                                                                                              |
| <b>Interviewer's instructions</b> | [Asked if u=3 and ran25=4. ]                                                                                                                                                           |
| <b>Notes</b>                      | I april 2015 innledet EU etterforskning av Gazproms forretningspraksis. Det finnes indikasjoner på at Gazprom fastsatte                                                                |

| Value | Label                                  | Cases | Percentage |
|-------|----------------------------------------|-------|------------|
| 1     | Very appropriate                       | 64    | 1.4%       |
| 2     | Somewhat appropriate                   | 37    | 0.8%       |
| 3     | Neither appropriate, nor inappropriate | 19    | 0.4%       |
| 4     | Somewhat inappropriate                 | 4     | 0.1%       |
| 5     | Not at all appropriate                 | 4     | 0.1%       |
| 6     | Do not know                            | 74    | 1.6%       |
| 7     | Not specified                          | 3     | 0.1%       |
| 97    | No answer                              | 8     | 0.2%       |
| 98    | Not asked                              | 4476  | 95.5%      |

Warning: these figures indicate the number of cases found in the data file. They cannot be interpreted as summary statistics of the population of interest.

### # ocr7marinove1\_5: Appropriate to investigate Gazprom: Unfair prices for Eastern European countries according to antitrust authorities

|                                   |                                                                                                                                                                                                                                                                         |
|-----------------------------------|-------------------------------------------------------------------------------------------------------------------------------------------------------------------------------------------------------------------------------------------------------------------------|
| <b>Information</b>                | [Type= discrete] [Format=numeric] [Range= 1-7] [Missing=*]                                                                                                                                                                                                              |
| <b>Statistics [NW/ W]</b>         | [Valid=4689 /-] [Invalid=0 /-]                                                                                                                                                                                                                                          |
| <b>Pre-question</b>               | In April 2015, the European Union opened an investigation into the business practices of Gazprom. According to the European antitrust authorities and other European institutions, there are indications that Gazprom set unfair prices for Eastern European countries. |
| <b>Literal question</b>           | In your opinion, is this investigation into the Russian energy giant Gazprom appropriate?                                                                                                                                                                               |
| <b>Interviewer's instructions</b> | [Asked if u=3 and ran25=5. ]                                                                                                                                                                                                                                            |
| <b>Notes</b>                      | I april 2015 innledet EU etterforskning av Gazproms forretningspraksis. Ifølge EUs antitrustmyndigheter og andre EU-inst                                                                                                                                                |

| Value | Label                                  | Cases | Percentage |
|-------|----------------------------------------|-------|------------|
| 1     | Very appropriate                       | 74    | 1.6%       |
| 2     | Somewhat appropriate                   | 48    | 1.0%       |
| 3     | Neither appropriate, nor inappropriate | 12    | 0.3%       |
| 4     | Somewhat inappropriate                 | 2     | 0.0%       |
| 5     | Not at all appropriate                 | 2     | 0.0%       |
| 6     | Do not know                            | 65    | 1.4%       |
| 7     | Not specified                          | 2     | 0.0%       |

## # ocr7marinove1\_5: Appropriate to investigate Gazprom: Unfair prices for Eastern European countries according to antitrust authorities

| Value | Label     | Cases | Percentage |
|-------|-----------|-------|------------|
| 97    | No answer | 5     | 0.1%       |
| 98    | Not asked | 4479  | 95.5%      |

Warning: these figures indicate the number of cases found in the data file. They cannot be interpreted as summary statistics of the population of interest.

## # ocr7marinove2\_1: Rating larger military presence Eastern Europe

|                                   |                                                                                                                     |
|-----------------------------------|---------------------------------------------------------------------------------------------------------------------|
| <b>Information</b>                | [Type= discrete] [Format=numeric] [Range= 1-7] [Missing=*]                                                          |
| <b>Statistics [NW/ W]</b>         | [Valid=4689 /-] [Invalid=0 /-]                                                                                      |
| <b>Pre-question</b>               | In the near future, NATO will increase troops and military equipment in Eastern Europe significantly.               |
| <b>Literal question</b>           | How would you rate the larger NATO military presence in Eastern Europe?                                             |
| <b>Interviewer's instructions</b> | [Asked if u=3 and ran26=1. ]                                                                                        |
| <b>Notes</b>                      | I nær fremtid vil NATO øke militære styrker og militært utstyr i Øst-Europa betraktelig. Hvordan vurderer du det øk |

| Value | Label                              | Cases | Percentage |
|-------|------------------------------------|-------|------------|
| 1     | Very positively                    | 20    | 0.4%       |
| 2     | Somewhat positively                | 42    | 0.9%       |
| 3     | Neither positively, nor negatively | 35    | 0.7%       |
| 4     | Somewhat negatively                | 58    | 1.2%       |
| 5     | Very negatively                    | 27    | 0.6%       |
| 6     | Do not know                        | 26    | 0.6%       |
| 7     | Not specified                      | 1     | 0.0%       |
| 97    | No answer                          | 3     | 0.1%       |
| 98    | Not asked                          | 4477  | 95.5%      |

Warning: these figures indicate the number of cases found in the data file. They cannot be interpreted as summary statistics of the population of interest.

## # ocr7marinove2\_2: Rating larger military presence Eastern Europe: May escalate small incidents

|                                   |                                                                                                                                                                              |
|-----------------------------------|------------------------------------------------------------------------------------------------------------------------------------------------------------------------------|
| <b>Information</b>                | [Type= discrete] [Format=numeric] [Range= 1-7] [Missing=*]                                                                                                                   |
| <b>Statistics [NW/ W]</b>         | [Valid=4689 /-] [Invalid=0 /-]                                                                                                                                               |
| <b>Pre-question</b>               | In the near future, NATO will increase troops and military equipment in Eastern Europe significantly. Such a rapid increase may escalate small incidents into regional wars. |
| <b>Literal question</b>           | How would you rate the larger NATO military presence in Eastern Europe?                                                                                                      |
| <b>Interviewer's instructions</b> | [Asked if u=3 and ran26=2. ]                                                                                                                                                 |
| <b>Notes</b>                      | I nær fremtid vil NATO øke militære styrker og militært utstyr i Øst-Europa betraktelig. En slik rask økning kan f                                                           |

| Value | Label                              | Cases | Percentage |
|-------|------------------------------------|-------|------------|
| 1     | Very positively                    | 7     | 0.1%       |
| 2     | Somewhat positively                | 39    | 0.8%       |
| 3     | Neither positively, nor negatively | 36    | 0.8%       |
| 4     | Somewhat negatively                | 62    | 1.3%       |
| 5     | Very negatively                    | 41    | 0.9%       |
| 6     | Do not know                        | 25    | 0.5%       |
| 7     | Not specified                      | 3     | 0.1%       |
| 97    | No answer                          | 3     | 0.1%       |
| 98    | Not asked                          | 4473  | 95.4%      |

Warning: these figures indicate the number of cases found in the data file. They cannot be interpreted as summary statistics of the population of interest.

| # ocr7marinove2_3: Rating larger military presence Eastern Europe: May escalate small incidents, pointed out by Russian experts                             |                                                                                                                                                                                                                                                    |       |            |
|-------------------------------------------------------------------------------------------------------------------------------------------------------------|----------------------------------------------------------------------------------------------------------------------------------------------------------------------------------------------------------------------------------------------------|-------|------------|
| Information                                                                                                                                                 | [Type= discrete] [Format=numeric] [Range= 1-7] [Missing=*]                                                                                                                                                                                         |       |            |
| Statistics [NW/ W]                                                                                                                                          | [Valid=4689 /-] [Invalid=0 /-]                                                                                                                                                                                                                     |       |            |
| Pre-question                                                                                                                                                | In the near future, NATO will increase troops and military equipment in Eastern Europe significantly. Russian experts point out that such a rapid increase could escalate even small incidents into regional wars.                                 |       |            |
| Literal question                                                                                                                                            | How would you rate the larger NATO military presence in Eastern Europe?                                                                                                                                                                            |       |            |
| Interviewer's instructions                                                                                                                                  | [Asked if u=3 and ran26=3. ]                                                                                                                                                                                                                       |       |            |
| Notes                                                                                                                                                       | I nær fremtid vil NATO øke militære styrker og militært utstyr i Øst-Europa betraktelig. Russiske eksperter peker p                                                                                                                                |       |            |
| Value                                                                                                                                                       | Label                                                                                                                                                                                                                                              | Cases | Percentage |
| 1                                                                                                                                                           | Very positively                                                                                                                                                                                                                                    | 10    | 0.2%       |
| 2                                                                                                                                                           | Somewhat positively                                                                                                                                                                                                                                | 34    | 0.7%       |
| 3                                                                                                                                                           | Neither positively, nor negatively                                                                                                                                                                                                                 | 28    | 0.6%       |
| 4                                                                                                                                                           | Somewhat negatively                                                                                                                                                                                                                                | 53    | 1.1%       |
| 5                                                                                                                                                           | Very negatively                                                                                                                                                                                                                                    | 51    | 1.1%       |
| 6                                                                                                                                                           | Do not know                                                                                                                                                                                                                                        | 15    | 0.3%       |
| 7                                                                                                                                                           | Not specified                                                                                                                                                                                                                                      | 1     | 0.0%       |
| 97                                                                                                                                                          | No answer                                                                                                                                                                                                                                          | 5     | 0.1%       |
| 98                                                                                                                                                          | Not asked                                                                                                                                                                                                                                          | 4492  | 95.8%      |
| Warning: these figures indicate the number of cases found in the data file. They cannot be interpreted as summary statistics of the population of interest. |                                                                                                                                                                                                                                                    |       |            |
| # ocr7marinove2_4: Rating larger military presence Eastern Europe: Designed to support NATO allies                                                          |                                                                                                                                                                                                                                                    |       |            |
| Information                                                                                                                                                 | [Type= discrete] [Format=numeric] [Range= 1-7] [Missing=*]                                                                                                                                                                                         |       |            |
| Statistics [NW/ W]                                                                                                                                          | [Valid=4689 /-] [Invalid=0 /-]                                                                                                                                                                                                                     |       |            |
| Pre-question                                                                                                                                                | In the near future, NATO will increase troops and military equipment in Eastern Europe significantly. This action is designed to support NATO allies in the face of Russian aggression in Eastern Ukraine.                                         |       |            |
| Literal question                                                                                                                                            | How would you rate the larger NATO military presence in Eastern Europe?                                                                                                                                                                            |       |            |
| Interviewer's instructions                                                                                                                                  | [Asked if u=3 and ran26=4. ]                                                                                                                                                                                                                       |       |            |
| Notes                                                                                                                                                       | I nær fremtid vil NATO øke militære styrker og militært utstyr i Øst-Europa betraktelig. Denne aksjonen er utformet                                                                                                                                |       |            |
| Value                                                                                                                                                       | Label                                                                                                                                                                                                                                              | Cases | Percentage |
| 1                                                                                                                                                           | Very positively                                                                                                                                                                                                                                    | 23    | 0.5%       |
| 2                                                                                                                                                           | Somewhat positively                                                                                                                                                                                                                                | 58    | 1.2%       |
| 3                                                                                                                                                           | Neither positively, nor negatively                                                                                                                                                                                                                 | 38    | 0.8%       |
| 4                                                                                                                                                           | Somewhat negatively                                                                                                                                                                                                                                | 53    | 1.1%       |
| 5                                                                                                                                                           | Very negatively                                                                                                                                                                                                                                    | 23    | 0.5%       |
| 6                                                                                                                                                           | Do not know                                                                                                                                                                                                                                        | 19    | 0.4%       |
| 7                                                                                                                                                           | Not specified                                                                                                                                                                                                                                      | 3     | 0.1%       |
| 97                                                                                                                                                          | No answer                                                                                                                                                                                                                                          | 3     | 0.1%       |
| 98                                                                                                                                                          | Not asked                                                                                                                                                                                                                                          | 4469  | 95.3%      |
| Warning: these figures indicate the number of cases found in the data file. They cannot be interpreted as summary statistics of the population of interest. |                                                                                                                                                                                                                                                    |       |            |
| # ocr7marinove2_5: Rating larger military presence Eastern Europe: Designed to support NATO allies, pointed out by US State Department                      |                                                                                                                                                                                                                                                    |       |            |
| Information                                                                                                                                                 | [Type= discrete] [Format=numeric] [Range= 1-7] [Missing=*]                                                                                                                                                                                         |       |            |
| Statistics [NW/ W]                                                                                                                                          | [Valid=4689 /-] [Invalid=0 /-]                                                                                                                                                                                                                     |       |            |
| Pre-question                                                                                                                                                | In the near future, NATO will increase troops and military equipment in Eastern Europe significantly. As the US State Department pointed out, this action is designed to support NATO allies in the face of Russian aggression in Eastern Ukraine. |       |            |

### # ocr7marinove2\_5: Rating larger military presence Eastern Europe: Designed to support NATO allies, pointed out by US State Department

|                                   |                                                                                                                      |
|-----------------------------------|----------------------------------------------------------------------------------------------------------------------|
| <b>Literal question</b>           | How would you rate the larger NATO military presence in Eastern Europe?                                              |
| <b>Interviewer's instructions</b> | [Asked if u=3 and ran26=5. ]                                                                                         |
| <b>Notes</b>                      | I nær fremtid vil NATO øke militære styrker og militært utstyr i Øst-Europa betraktelig. Som det amerikanske utenrik |

| Value | Label                              | Cases | Percentage |
|-------|------------------------------------|-------|------------|
| 1     | Very positively                    | 15    | 0.3%       |
| 2     | Somewhat positively                | 56    | 1.2%       |
| 3     | Neither positively, nor negatively | 34    | 0.7%       |
| 4     | Somewhat negatively                | 58    | 1.2%       |
| 5     | Very negatively                    | 39    | 0.8%       |
| 6     | Do not know                        | 25    | 0.5%       |
| 7     | Not specified                      | 1     | 0.0%       |
| 97    | No answer                          | 5     | 0.1%       |
| 98    | Not asked                          | 4456  | 95.0%      |

Warning: these figures indicate the number of cases found in the data file. They cannot be interpreted as summary statistics of the population of interest.

### # ocr7marinove3\_1: Evaluation of protests that led to the resignation of Yanukovych

|                                   |                                                                                                                        |
|-----------------------------------|------------------------------------------------------------------------------------------------------------------------|
| <b>Information</b>                | [Type= discrete] [Format=numeric] [Range= 1-7] [Missing=*]                                                             |
| <b>Statistics [NW/ W]</b>         | [Valid=4689 /-] [Invalid=0 /-]                                                                                         |
| <b>Pre-question</b>               | In March 2014, mass demonstrations forced Ukrainian President Yanukovych to resign.                                    |
| <b>Literal question</b>           | How would you evaluate the protests that led to the resignation of President Yanukovych?                               |
| <b>Interviewer's instructions</b> | [Asked if u=3 and ran27=1. ]                                                                                           |
| <b>Notes</b>                      | I mars 2014 tvang massedemonstrasjoner den ukrainske presidenten Yanukovych til å gå av. Hvordan vil du vurdere protes |

| Value | Label                              | Cases | Percentage |
|-------|------------------------------------|-------|------------|
| 1     | Very positively                    | 25    | 0.5%       |
| 2     | Somewhat positively                | 37    | 0.8%       |
| 3     | Neither positively, nor negatively | 34    | 0.7%       |
| 4     | Somewhat negatively                | 7     | 0.1%       |
| 5     | Very negatively                    | 5     | 0.1%       |
| 6     | Do not know                        | 79    | 1.7%       |
| 7     | Not specified                      | 8     | 0.2%       |
| 97    | No answer                          | 7     | 0.1%       |
| 98    | Not asked                          | 4487  | 95.7%      |

Warning: these figures indicate the number of cases found in the data file. They cannot be interpreted as summary statistics of the population of interest.

### # ocr7marinove3\_2: Evaluation of protests that led to the resignation of Yanukovych: Coup to expand the sphere of influence of the West

|                                   |                                                                                                                                                                                                                                             |
|-----------------------------------|---------------------------------------------------------------------------------------------------------------------------------------------------------------------------------------------------------------------------------------------|
| <b>Information</b>                | [Type= discrete] [Format=numeric] [Range= 1-7] [Missing=*]                                                                                                                                                                                  |
| <b>Statistics [NW/ W]</b>         | [Valid=4689 /-] [Invalid=0 /-]                                                                                                                                                                                                              |
| <b>Pre-question</b>               | In March 2014, mass demonstrations forced Ukrainian President Yanukovych to resign. These protests and the subsequent events have been called a coup, using the guise of promoting democracy to expand the sphere of influence of the West. |
| <b>Literal question</b>           | How would you evaluate the protests that led to the resignation of President Yanukovych?                                                                                                                                                    |
| <b>Interviewer's instructions</b> | [Asked if u=3 and ran27=2. ]                                                                                                                                                                                                                |
| <b>Notes</b>                      | I mars 2014 tvang massedemonstrasjoner den ukrainske presidenten Yanukovych til å gå av. Disse protestene og de etterf                                                                                                                      |

### # ocr7marinove3\_2: Evaluation of protests that led to the resignation of Yanukovych: Coup to expand the sphere of influence of the West

| Value | Label                              | Cases | Percentage |
|-------|------------------------------------|-------|------------|
| 1     | Very positively                    | 26    | 0.6%       |
| 2     | Somewhat positively                | 39    | 0.8%       |
| 3     | Neither positively, nor negatively | 35    | 0.7%       |
| 4     | Somewhat negatively                | 18    | 0.4%       |
| 5     | Very negatively                    | 6     | 0.1%       |
| 6     | Do not know                        | 71    | 1.5%       |
| 7     | Not specified                      | 4     | 0.1%       |
| 97    | No answer                          | 10    | 0.2%       |
| 98    | Not asked                          | 4480  | 95.5%      |

Warning: these figures indicate the number of cases found in the data file. They cannot be interpreted as summary statistics of the population of interest.

### # ocr7marinove3\_3: Evaluation of protests that led to the resignation of Yanukovych: Coup to expand the sphere of influence of the West, according to Russian leadership

|                                   |                                                                                                                                                                                                                                                              |
|-----------------------------------|--------------------------------------------------------------------------------------------------------------------------------------------------------------------------------------------------------------------------------------------------------------|
| <b>Information</b>                | [Type= discrete] [Format=numeric] [Range= 1-7] [Missing=*]                                                                                                                                                                                                   |
| <b>Statistics [NW/ W]</b>         | [Valid=4689 /-] [Invalid=0 /-]                                                                                                                                                                                                                               |
| <b>Pre-question</b>               | In March 2014, mass demonstrations forced Ukrainian President Yanukovych to resign. The Russian leadership has called these protests and the subsequent events a coup, using the guise of promoting democracy to expand the sphere of influence of the West. |
| <b>Literal question</b>           | How would you evaluate the protests that led to the resignation of President Yanukovych?                                                                                                                                                                     |
| <b>Interviewer's instructions</b> | [Asked if u=3 and ran27=3. ]                                                                                                                                                                                                                                 |
| <b>Notes</b>                      | I mars 2014 tvang massedemonstrasjoner den ukrainske presidenten Yanukovych til å gå av. Det russiske lederskapet har k                                                                                                                                      |

| Value | Label                              | Cases | Percentage |
|-------|------------------------------------|-------|------------|
| 1     | Very positively                    | 33    | 0.7%       |
| 2     | Somewhat positively                | 68    | 1.5%       |
| 3     | Neither positively, nor negatively | 41    | 0.9%       |
| 4     | Somewhat negatively                | 5     | 0.1%       |
| 5     | Very negatively                    | 10    | 0.2%       |
| 6     | Do not know                        | 65    | 1.4%       |
| 7     | Not specified                      | 4     | 0.1%       |
| 97    | No answer                          | 9     | 0.2%       |
| 98    | Not asked                          | 4454  | 95.0%      |

Warning: these figures indicate the number of cases found in the data file. They cannot be interpreted as summary statistics of the population of interest.

### # ocr7marinove3\_4: Evaluation of protests that led to the resignation of Yanukovych: Undertaken by the Ukrainian people, led to free elections and opened a European perspective

|                                   |                                                                                                                                                                                                                                   |
|-----------------------------------|-----------------------------------------------------------------------------------------------------------------------------------------------------------------------------------------------------------------------------------|
| <b>Information</b>                | [Type= discrete] [Format=numeric] [Range= 1-7] [Missing=*]                                                                                                                                                                        |
| <b>Statistics [NW/ W]</b>         | [Valid=4689 /-] [Invalid=0 /-]                                                                                                                                                                                                    |
| <b>Pre-question</b>               | In March 2014, mass demonstrations forced Ukrainian President Yanukovych to resign. The protests against Yanukovych were undertaken by the Ukrainian people, led to free elections and opened a European perspective for Ukraine. |
| <b>Literal question</b>           | How would you evaluate the protests that led to the resignation of President Yanukovych?                                                                                                                                          |
| <b>Interviewer's instructions</b> | [Asked if u=3 and ran27=4. ]                                                                                                                                                                                                      |
| <b>Notes</b>                      | I mars 2014 tvang massedemonstrasjoner den ukrainske presidenten Yanukovych til å gå av. Disse protestene mot Yanukovyc                                                                                                           |

| Value | Label           | Cases | Percentage |
|-------|-----------------|-------|------------|
| 1     | Very positively | 84    | 1.8%       |

**# ocr7marinove3\_4: Evaluation of protests that led to the resignation of Yanukovych: Undertaken by the Ukrainian people, led to free elections and opened a European perspective**

| Value | Label                              | Cases | Percentage |
|-------|------------------------------------|-------|------------|
| 2     | Somewhat positively                | 70    | 1.5%       |
| 3     | Neither positively, nor negatively | 20    | 0.4%       |
| 4     | Somewhat negatively                | 5     | 0.1%       |
| 5     | Very negatively                    | 1     | 0.0%       |
| 6     | Do not know                        | 40    | 0.9%       |
| 7     | Not specified                      | 4     | 0.1%       |
| 97    | No answer                          | 7     | 0.1%       |
| 98    | Not asked                          | 4458  | 95.1%      |

*Warning: these figures indicate the number of cases found in the data file. They cannot be interpreted as summary statistics of the population of interest.*

**# ocr7marinove3\_5: Evaluation of protests that led to the resignation of Yanukovych: Undertaken by the Ukrainian people, led to free elections and opened a European perspective, noted by Norwegian/Western politicians**

|                                   |                                                                                                                                                                                                                                                                                           |
|-----------------------------------|-------------------------------------------------------------------------------------------------------------------------------------------------------------------------------------------------------------------------------------------------------------------------------------------|
| <b>Information</b>                | [Type= discrete] [Format=numeric] [Range= 1-7] [Missing=*]                                                                                                                                                                                                                                |
| <b>Statistics [NW/ W]</b>         | [Valid=4689 /-] [Invalid=0 /-]                                                                                                                                                                                                                                                            |
| <b>Pre-question</b>               | In March 2014, mass demonstrations forced Ukrainian President Yanukovych to resign. Norwegian and other Western politicians have noted that the protests against Yanukovych were undertaken by the Ukrainian people, led to free elections and opened a European perspective for Ukraine. |
| <b>Literal question</b>           | How would you evaluate the protests that led to the resignation of President Yanukovych?                                                                                                                                                                                                  |
| <b>Interviewer's instructions</b> | [Asked if u=3 and ran27=5. ]                                                                                                                                                                                                                                                              |
| <b>Notes</b>                      | I mars 2014 tvang massedemonstrasjoner den ukrainske presidenten Yanukovych til å gå av. Norske og andre vestlige polit                                                                                                                                                                   |

| Value | Label                              | Cases | Percentage |
|-------|------------------------------------|-------|------------|
| 1     | Very positively                    | 49    | 1.0%       |
| 2     | Somewhat positively                | 54    | 1.2%       |
| 3     | Neither positively, nor negatively | 26    | 0.6%       |
| 4     | Somewhat negatively                | 11    | 0.2%       |
| 5     | Very negatively                    | 6     | 0.1%       |
| 6     | Do not know                        | 47    | 1.0%       |
| 7     | Not specified                      | 3     | 0.1%       |
| 97    | No answer                          | 5     | 0.1%       |
| 98    | Not asked                          | 4488  | 95.7%      |

*Warning: these figures indicate the number of cases found in the data file. They cannot be interpreted as summary statistics of the population of interest.*

**# ocr7marinove4\_1: Reliability commitment of NATO to assist Turkey**

|                                   |                                                                                                                        |
|-----------------------------------|------------------------------------------------------------------------------------------------------------------------|
| <b>Information</b>                | [Type= discrete] [Format=numeric] [Range= 1-7] [Missing=*]                                                             |
| <b>Statistics [NW/ W]</b>         | [Valid=4689 /-] [Invalid=0 /-]                                                                                         |
| <b>Pre-question</b>               | Turkey relies on the support of NATO in case of a military conflict with Russia.                                       |
| <b>Literal question</b>           | How reliable do you think is the commitment of NATO to assist Turkey?                                                  |
| <b>Interviewer's instructions</b> | [Asked if u=3 and ran28=1. ]                                                                                           |
| <b>Notes</b>                      | Tyrkia er avhengig av støtte fra NATO ved en eventuell militær konflikt med Russland. Hvor troverdig mener du NATOs fo |

| Value | Label             | Cases | Percentage |
|-------|-------------------|-------|------------|
| 1     | Very reliable     | 13    | 0.3%       |
| 2     | Rather reliable   | 70    | 1.5%       |
| 3     | Partly reliable   | 70    | 1.5%       |
| 4     | Rather unreliable | 30    | 0.6%       |

| # ocr7marinove4_1: Reliability commitment of NATO to assist Turkey                                                                                          |                                                                                                                                                                                                                                                                                                                                            |       |            |
|-------------------------------------------------------------------------------------------------------------------------------------------------------------|--------------------------------------------------------------------------------------------------------------------------------------------------------------------------------------------------------------------------------------------------------------------------------------------------------------------------------------------|-------|------------|
| Value                                                                                                                                                       | Label                                                                                                                                                                                                                                                                                                                                      | Cases | Percentage |
| 5                                                                                                                                                           | Not at all reliable                                                                                                                                                                                                                                                                                                                        | 3     | 0.1%       |
| 6                                                                                                                                                           | Do not know                                                                                                                                                                                                                                                                                                                                | 40    | 0.9%       |
| 7                                                                                                                                                           | Not specified                                                                                                                                                                                                                                                                                                                              | 2     | 0.0%       |
| 97                                                                                                                                                          | No answer                                                                                                                                                                                                                                                                                                                                  | 5     | 0.1%       |
| 98                                                                                                                                                          | Not asked                                                                                                                                                                                                                                                                                                                                  | 4456  | 95.0%      |
| Warning: these figures indicate the number of cases found in the data file. They cannot be interpreted as summary statistics of the population of interest. |                                                                                                                                                                                                                                                                                                                                            |       |            |
| # ocr7marinove4_2: Reliability commitment of NATO to assist Turkey: Could hesitate because of Erdogans policies                                             |                                                                                                                                                                                                                                                                                                                                            |       |            |
| Information                                                                                                                                                 | [Type= discrete] [Format=numeric] [Range= 1-7] [Missing=*]                                                                                                                                                                                                                                                                                 |       |            |
| Statistics [NW/ W]                                                                                                                                          | [Valid=4689 /-] [Invalid=0 /-]                                                                                                                                                                                                                                                                                                             |       |            |
| Pre-question                                                                                                                                                | Turkey relies on the support of NATO in case of a military conflict with Russia. However, Western allies have been increasingly critical of the policies of the Turkish President Erdogan. NATO could therefore hesitate to intervene if Turkey gets in a military conflict with Russia over Syria.                                        |       |            |
| Literal question                                                                                                                                            | How reliable do you think is the commitment of NATO to assist Turkey?                                                                                                                                                                                                                                                                      |       |            |
| Interviewer's instructions                                                                                                                                  | [Asked if u=3 and ran28=2. ]                                                                                                                                                                                                                                                                                                               |       |            |
| Notes                                                                                                                                                       | Tyrkia er avhengig av støtte fra NATO ved en eventuell militær konflikt med Russland. Vestlige allierte har imidlertid                                                                                                                                                                                                                     |       |            |
| Value                                                                                                                                                       | Label                                                                                                                                                                                                                                                                                                                                      | Cases | Percentage |
| 1                                                                                                                                                           | Very reliable                                                                                                                                                                                                                                                                                                                              | 11    | 0.2%       |
| 2                                                                                                                                                           | Rather reliable                                                                                                                                                                                                                                                                                                                            | 57    | 1.2%       |
| 3                                                                                                                                                           | Partly reliable                                                                                                                                                                                                                                                                                                                            | 52    | 1.1%       |
| 4                                                                                                                                                           | Rather unreliable                                                                                                                                                                                                                                                                                                                          | 31    | 0.7%       |
| 5                                                                                                                                                           | Not at all reliable                                                                                                                                                                                                                                                                                                                        | 2     | 0.0%       |
| 6                                                                                                                                                           | Do not know                                                                                                                                                                                                                                                                                                                                | 41    | 0.9%       |
| 7                                                                                                                                                           | Not specified                                                                                                                                                                                                                                                                                                                              | 5     | 0.1%       |
| 97                                                                                                                                                          | No answer                                                                                                                                                                                                                                                                                                                                  | 6     | 0.1%       |
| 98                                                                                                                                                          | Not asked                                                                                                                                                                                                                                                                                                                                  | 4484  | 95.6%      |
| Warning: these figures indicate the number of cases found in the data file. They cannot be interpreted as summary statistics of the population of interest. |                                                                                                                                                                                                                                                                                                                                            |       |            |
| # ocr7marinove4_3: Reliability commitment of NATO to assist Turkey: Could hesitate because of Erdogans policies, argued by Russian government               |                                                                                                                                                                                                                                                                                                                                            |       |            |
| Information                                                                                                                                                 | [Type= discrete] [Format=numeric] [Range= 1-7] [Missing=*]                                                                                                                                                                                                                                                                                 |       |            |
| Statistics [NW/ W]                                                                                                                                          | [Valid=4689 /-] [Invalid=0 /-]                                                                                                                                                                                                                                                                                                             |       |            |
| Pre-question                                                                                                                                                | Turkey relies on the support of NATO in case of a military conflict with Russia. However, Western allies have been increasingly critical of the policies of the Turkish President Erdogan. The Russian government has argued that NATO could therefore hesitate to intervene if Turkey gets in a military conflict with Russia over Syria. |       |            |
| Literal question                                                                                                                                            | How reliable do you think is the commitment of NATO to assist Turkey?                                                                                                                                                                                                                                                                      |       |            |
| Interviewer's instructions                                                                                                                                  | [Asked if u=3 and ran28=3. ]                                                                                                                                                                                                                                                                                                               |       |            |
| Notes                                                                                                                                                       | Tyrkia er avhengig av støtte fra NATO ved en eventuell militær konflikt med Russland. Vestlige allierte har imidlertid                                                                                                                                                                                                                     |       |            |
| Value                                                                                                                                                       | Label                                                                                                                                                                                                                                                                                                                                      | Cases | Percentage |
| 1                                                                                                                                                           | Very reliable                                                                                                                                                                                                                                                                                                                              | 17    | 0.4%       |
| 2                                                                                                                                                           | Rather reliable                                                                                                                                                                                                                                                                                                                            | 48    | 1.0%       |
| 3                                                                                                                                                           | Partly reliable                                                                                                                                                                                                                                                                                                                            | 62    | 1.3%       |
| 4                                                                                                                                                           | Rather unreliable                                                                                                                                                                                                                                                                                                                          | 12    | 0.3%       |
| 5                                                                                                                                                           | Not at all reliable                                                                                                                                                                                                                                                                                                                        | 2     | 0.0%       |
| 6                                                                                                                                                           | Do not know                                                                                                                                                                                                                                                                                                                                | 53    | 1.1%       |
| 7                                                                                                                                                           | Not specified                                                                                                                                                                                                                                                                                                                              | 2     | 0.0%       |

**# ocr7marinove4\_3: Reliability commitment of NATO to assist Turkey: Could hesitate because of Erdogans policies, argued by Russian government**

| Value | Label     | Cases | Percentage |
|-------|-----------|-------|------------|
| 97    | No answer | 7     | 0.1%       |
| 98    | Not asked | 4486  | 95.7%      |

Warning: these figures indicate the number of cases found in the data file. They cannot be interpreted as summary statistics of the population of interest.

**# ocr7marinove4\_4: Reliability commitment of NATO to assist Turkey: Alliance never neglected its obligations**

|                                   |                                                                                                                                                                                                                           |
|-----------------------------------|---------------------------------------------------------------------------------------------------------------------------------------------------------------------------------------------------------------------------|
| <b>Information</b>                | [Type= discrete] [Format=numeric] [Range= 1-7] [Missing=*]                                                                                                                                                                |
| <b>Statistics [NW/ W]</b>         | [Valid=4689 /-] [Invalid=0 /-]                                                                                                                                                                                            |
| <b>Pre-question</b>               | Turkey relies on the support of NATO in case of a military conflict with Russia. In the history of NATO, there has never been a case in which the Alliance has neglected its obligations and refused to support a member. |
| <b>Literal question</b>           | How reliable do you think is the commitment of NATO to assist Turkey?                                                                                                                                                     |
| <b>Interviewer's instructions</b> | [Asked if u=3 and ran28=4. ]                                                                                                                                                                                              |
| <b>Notes</b>                      | Tyrkia er avhengig av støtte fra NATO ved en eventuell militær konflikt med Russland. I NATOs historie har det aldri v                                                                                                    |

| Value | Label               | Cases | Percentage |
|-------|---------------------|-------|------------|
| 1     | Very reliable       | 25    | 0.5%       |
| 2     | Rather reliable     | 66    | 1.4%       |
| 3     | Partly reliable     | 56    | 1.2%       |
| 4     | Rather unreliable   | 21    | 0.4%       |
| 5     | Not at all reliable | 3     | 0.1%       |
| 6     | Do not know         | 38    | 0.8%       |
| 7     | Not specified       | 1     | 0.0%       |
| 97    | No answer           | 3     | 0.1%       |
| 98    | Not asked           | 4476  | 95.5%      |

Warning: these figures indicate the number of cases found in the data file. They cannot be interpreted as summary statistics of the population of interest.

**# ocr7marinove4\_5: Reliability commitment of NATO to assist Turkey: Alliance never neglected its obligations, pointed out by NATO officials**

|                                   |                                                                                                                                                                                                                                                          |
|-----------------------------------|----------------------------------------------------------------------------------------------------------------------------------------------------------------------------------------------------------------------------------------------------------|
| <b>Information</b>                | [Type= discrete] [Format=numeric] [Range= 1-7] [Missing=*]                                                                                                                                                                                               |
| <b>Statistics [NW/ W]</b>         | [Valid=4689 /-] [Invalid=0 /-]                                                                                                                                                                                                                           |
| <b>Pre-question</b>               | Turkey relies on the support of NATO in case of a military conflict with Russia. NATO officials point out that, in the history of NATO, there has never been a case in which the Alliance has neglected its obligations and refused to support a member. |
| <b>Literal question</b>           | How reliable do you think is the commitment of NATO to assist Turkey?                                                                                                                                                                                    |
| <b>Interviewer's instructions</b> | [Asked if u=3 and ran28=5. ]                                                                                                                                                                                                                             |
| <b>Notes</b>                      | Tyrkia er avhengig av støtte fra NATO ved en eventuell militær konflikt med Russland. NATO-tjenestemenn påpeker at i N                                                                                                                                   |

| Value | Label               | Cases | Percentage |
|-------|---------------------|-------|------------|
| 1     | Very reliable       | 27    | 0.6%       |
| 2     | Rather reliable     | 66    | 1.4%       |
| 3     | Partly reliable     | 66    | 1.4%       |
| 4     | Rather unreliable   | 14    | 0.3%       |
| 5     | Not at all reliable | 2     | 0.0%       |
| 6     | Do not know         | 46    | 1.0%       |
| 7     | Not specified       | 1     | 0.0%       |
| 97    | No answer           | 2     | 0.0%       |
| 98    | Not asked           | 4465  | 95.2%      |

Warning: these figures indicate the number of cases found in the data file. They cannot be interpreted as summary statistics of the population of interest.



| # ocr7marinove5_1: How often does media in Norway self-censor so as not to cast migrants in a bad light                                                                             |                                                                                                                                                                                                                                                                                                                                  |       |            |
|-------------------------------------------------------------------------------------------------------------------------------------------------------------------------------------|----------------------------------------------------------------------------------------------------------------------------------------------------------------------------------------------------------------------------------------------------------------------------------------------------------------------------------|-------|------------|
| Information                                                                                                                                                                         | [Type= discrete] [Format=numeric] [Range= 1-7] [Missing=*]                                                                                                                                                                                                                                                                       |       |            |
| Statistics [NW/ W]                                                                                                                                                                  | [Valid=4689 /-] [Invalid=0 /-]                                                                                                                                                                                                                                                                                                   |       |            |
| Pre-question                                                                                                                                                                        | It can be difficult to find reporting in the media about the dramatic challenges of integrating refugees and foreigners, such as those visible in migrant-populated Rinkeby and Husby areas of Stockholm.                                                                                                                        |       |            |
| Literal question                                                                                                                                                                    | How often do you think media in Norway self-censors its reporting so as not to cast migrants in a bad light?                                                                                                                                                                                                                     |       |            |
| Interviewer's instructions                                                                                                                                                          | [Asked if u=3 and ran29=1. ]                                                                                                                                                                                                                                                                                                     |       |            |
| Notes                                                                                                                                                                               | Det kan være vanskelig å finne reportasjer i mediene om de dramatiske utfordringene med å integrere flyktninger og utl                                                                                                                                                                                                           |       |            |
| Value                                                                                                                                                                               | Label                                                                                                                                                                                                                                                                                                                            | Cases | Percentage |
| 1                                                                                                                                                                                   | Always                                                                                                                                                                                                                                                                                                                           | 10    | 0.2%       |
| 2                                                                                                                                                                                   | Often                                                                                                                                                                                                                                                                                                                            | 49    | 1.0%       |
| 3                                                                                                                                                                                   | Sometimes                                                                                                                                                                                                                                                                                                                        | 79    | 1.7%       |
| 4                                                                                                                                                                                   | Seldom                                                                                                                                                                                                                                                                                                                           | 41    | 0.9%       |
| 5                                                                                                                                                                                   | Never                                                                                                                                                                                                                                                                                                                            | 4     | 0.1%       |
| 6                                                                                                                                                                                   | Do not know                                                                                                                                                                                                                                                                                                                      | 35    | 0.7%       |
| 7                                                                                                                                                                                   | Not specified                                                                                                                                                                                                                                                                                                                    | 0     |            |
| 97                                                                                                                                                                                  | No answer                                                                                                                                                                                                                                                                                                                        | 5     | 0.1%       |
| 98                                                                                                                                                                                  | Not asked                                                                                                                                                                                                                                                                                                                        | 4466  | 95.2%      |
| Warning: these figures indicate the number of cases found in the data file. They cannot be interpreted as summary statistics of the population of interest.                         |                                                                                                                                                                                                                                                                                                                                  |       |            |
| # ocr7marinove5_2: How often does media in Norway self-censor so as not to cast migrants in a bad light: Can be accused of racism, press-freedom has suffered                       |                                                                                                                                                                                                                                                                                                                                  |       |            |
| Information                                                                                                                                                                         | [Type= discrete] [Format=numeric] [Range= 1-7] [Missing=*]                                                                                                                                                                                                                                                                       |       |            |
| Statistics [NW/ W]                                                                                                                                                                  | [Valid=4689 /-] [Invalid=0 /-]                                                                                                                                                                                                                                                                                                   |       |            |
| Pre-question                                                                                                                                                                        | It can be difficult to find reporting in the media about the dramatic challenges of integrating refugees and foreigners, such as those visible in migrant-populated Rinkeby and Husby areas of Stockholm. Because media publishing information on the issue can be accused of racism, press-freedom in Scandinavia has suffered. |       |            |
| Literal question                                                                                                                                                                    | How often do you think media in Norway self-censors its reporting so as not to cast migrants in a bad light?                                                                                                                                                                                                                     |       |            |
| Interviewer's instructions                                                                                                                                                          | [Asked if u=3 and ran29=2. ]                                                                                                                                                                                                                                                                                                     |       |            |
| Notes                                                                                                                                                                               | Det kan være vanskelig å finne reportasjer i mediene om de dramatiske utfordringene med å integrere flyktninger og utl                                                                                                                                                                                                           |       |            |
| Value                                                                                                                                                                               | Label                                                                                                                                                                                                                                                                                                                            | Cases | Percentage |
| 1                                                                                                                                                                                   | Always                                                                                                                                                                                                                                                                                                                           | 3     | 0.1%       |
| 2                                                                                                                                                                                   | Often                                                                                                                                                                                                                                                                                                                            | 43    | 0.9%       |
| 3                                                                                                                                                                                   | Sometimes                                                                                                                                                                                                                                                                                                                        | 78    | 1.7%       |
| 4                                                                                                                                                                                   | Seldom                                                                                                                                                                                                                                                                                                                           | 32    | 0.7%       |
| 5                                                                                                                                                                                   | Never                                                                                                                                                                                                                                                                                                                            | 2     | 0.0%       |
| 6                                                                                                                                                                                   | Do not know                                                                                                                                                                                                                                                                                                                      | 26    | 0.6%       |
| 7                                                                                                                                                                                   | Not specified                                                                                                                                                                                                                                                                                                                    | 1     | 0.0%       |
| 97                                                                                                                                                                                  | No answer                                                                                                                                                                                                                                                                                                                        | 2     | 0.0%       |
| 98                                                                                                                                                                                  | Not asked                                                                                                                                                                                                                                                                                                                        | 4502  | 96.0%      |
| Warning: these figures indicate the number of cases found in the data file. They cannot be interpreted as summary statistics of the population of interest.                         |                                                                                                                                                                                                                                                                                                                                  |       |            |
| # ocr7marinove5_3: How often does media in Norway self-censor so as not to cast migrants in a bad light: Can be accused of racism, press-freedom has suffered, suggested by Sputnik |                                                                                                                                                                                                                                                                                                                                  |       |            |
| Information                                                                                                                                                                         | [Type= discrete] [Format=numeric] [Range= 1-7] [Missing=*]                                                                                                                                                                                                                                                                       |       |            |
| Statistics [NW/ W]                                                                                                                                                                  | [Valid=4689 /-] [Invalid=0 /-]                                                                                                                                                                                                                                                                                                   |       |            |
| Pre-question                                                                                                                                                                        | It can be difficult to find reporting in the media about the dramatic challenges of integrating refugees and foreigners, such as those visible in migrant-populated Rinkeby and Husby areas of Stockholm. Sputnik, the news agency founded by the Russian                                                                        |       |            |

**# ocr7marinove5\_3: How often does media in Norway self-censor so as not to cast migrants in a bad light: Can be accused of racism, press-freedom has suffered, suggested by Sputnik**

|                                   | government, has suggested that because media publishing information on the issue can be accused of racism, press-freedom in Scandinavia has suffered. |       |            |
|-----------------------------------|-------------------------------------------------------------------------------------------------------------------------------------------------------|-------|------------|
| <b>Literal question</b>           | How often do you think media in Norway self-censors its reporting so as not to cast migrants in a bad light?                                          |       |            |
| <b>Interviewer's instructions</b> | [Asked if u=3 and ran29=3. ]                                                                                                                          |       |            |
| <b>Notes</b>                      | Det kan være vanskelig å finne reportasjer i mediene om de dramatiske utfordringene med å integrere flyktninger og utl                                |       |            |
| Value                             | Label                                                                                                                                                 | Cases | Percentage |
| 1                                 | Always                                                                                                                                                | 8     | 0.2%       |
| 2                                 | Often                                                                                                                                                 | 47    | 1.0%       |
| 3                                 | Sometimes                                                                                                                                             | 98    | 2.1%       |
| 4                                 | Seldom                                                                                                                                                | 37    | 0.8%       |
| 5                                 | Never                                                                                                                                                 | 8     | 0.2%       |
| 6                                 | Do not know                                                                                                                                           | 26    | 0.6%       |
| 7                                 | Not specified                                                                                                                                         | 0     |            |
| 97                                | No answer                                                                                                                                             | 5     | 0.1%       |
| 98                                | Not asked                                                                                                                                             | 4460  | 95.1%      |

*Warning: these figures indicate the number of cases found in the data file. They cannot be interpreted as summary statistics of the population of interest.*

**# ocr7marinove5\_4: How often does media in Norway self-censor so as not to cast migrants in a bad light: NRK offered an honest look**

|                                   |                                                                                                                                                                                                                                                                                                                  |
|-----------------------------------|------------------------------------------------------------------------------------------------------------------------------------------------------------------------------------------------------------------------------------------------------------------------------------------------------------------|
| <b>Information</b>                | [Type= discrete] [Format=numeric] [Range= 1-7] [Missing=*]                                                                                                                                                                                                                                                       |
| <b>Statistics [NW/ W]</b>         | [Valid=4689 /-] [Invalid=0 /-]                                                                                                                                                                                                                                                                                   |
| <b>Pre-question</b>               | It can be difficult to find reporting in the media about the dramatic challenges of integrating refugees and foreigners, such as those visible in migrant-populated Rinkeby and Husby areas of Stockholm. The Norwegian channel NRK has sent a team and offered an honest look at the conditions in those areas. |
| <b>Literal question</b>           | How often do you think media in Norway self-censors its reporting so as not to cast migrants in a bad light?                                                                                                                                                                                                     |
| <b>Interviewer's instructions</b> | [Asked if u=3 and ran29=4. ]                                                                                                                                                                                                                                                                                     |
| <b>Notes</b>                      | Det kan være vanskelig å finne reportasjer i mediene om de dramatiske utfordringene med å integrere flyktninger og utl                                                                                                                                                                                           |

| Value | Label         | Cases | Percentage |
|-------|---------------|-------|------------|
| 1     | Always        | 7     | 0.1%       |
| 2     | Often         | 54    | 1.2%       |
| 3     | Sometimes     | 92    | 2.0%       |
| 4     | Seldom        | 45    | 1.0%       |
| 5     | Never         | 6     | 0.1%       |
| 6     | Do not know   | 23    | 0.5%       |
| 7     | Not specified | 0     |            |
| 97    | No answer     | 3     | 0.1%       |
| 98    | Not asked     | 4459  | 95.1%      |

*Warning: these figures indicate the number of cases found in the data file. They cannot be interpreted as summary statistics of the population of interest.*

**# ocr7marinove5\_5: How often does media in Norway self-censor so as not to cast migrants in a bad light: NRK offered an honest look, pointed out by media experts**

|                           |                                                                                                                                                                                                                                                                                                                                                                                            |
|---------------------------|--------------------------------------------------------------------------------------------------------------------------------------------------------------------------------------------------------------------------------------------------------------------------------------------------------------------------------------------------------------------------------------------|
| <b>Information</b>        | [Type= discrete] [Format=numeric] [Range= 1-7] [Missing=*]                                                                                                                                                                                                                                                                                                                                 |
| <b>Statistics [NW/ W]</b> | [Valid=4689 /-] [Invalid=0 /-]                                                                                                                                                                                                                                                                                                                                                             |
| <b>Pre-question</b>       | It is sometimes difficult to find reporting in the media about the challenges faced when integrating refugees and foreigners, visible in places such as Rinkeby and Husby areas of Stockholm. Media experts point to the fact that the Norwegian channel NRK has sent a team and offered an honest look at the conditions in those areas, as proof that media reporting is free in Norway. |

**# ocr7marinove5\_5: How often does media in Norway self-censor so as not to cast migrants in a bad light: NRK offered an honest look, pointed out by media experts**

|                                   |                                                                                                                        |
|-----------------------------------|------------------------------------------------------------------------------------------------------------------------|
| <b>Literal question</b>           | How often do you think media in Norway self-censors its reporting so as not to cast migrants in a bad light?           |
| <b>Interviewer's instructions</b> | [Asked if u=3 and ran29=5. ]                                                                                           |
| <b>Notes</b>                      | Det kan være vanskelig å finne reportasjer i mediene om utfordringene med å integrere flyktninger og utlendinger, synl |

| Value | Label         | Cases | Percentage |
|-------|---------------|-------|------------|
| 1     | Always        | 5     | 0.1%       |
| 2     | Often         | 45    | 1.0%       |
| 3     | Sometimes     | 85    | 1.8%       |
| 4     | Seldom        | 27    | 0.6%       |
| 5     | Never         | 5     | 0.1%       |
| 6     | Do not know   | 35    | 0.7%       |
| 7     | Not specified | 0     |            |
| 97    | No answer     | 7     | 0.1%       |
| 98    | Not asked     | 4480  | 95.5%      |

Warning: these figures indicate the number of cases found in the data file. They cannot be interpreted as summary statistics of the population of interest.

**# ocr7marinove6\_1: How justified is an increase in military spending**

|                                   |                                                                                                                                                                                          |
|-----------------------------------|------------------------------------------------------------------------------------------------------------------------------------------------------------------------------------------|
| <b>Information</b>                | [Type= discrete] [Format=numeric] [Range= 1-7] [Missing=*]                                                                                                                               |
| <b>Statistics [NW/ W]</b>         | [Valid=4689 /-] [Invalid=0 /-]                                                                                                                                                           |
| <b>Pre-question</b>               | Norway's Ministry of Defense has proposed a Long Term Plan for the country's military under which defense spending will increase by more than NOK 160 billion over the next two decades. |
| <b>Literal question</b>           | In your view, how justified is such a big increase in military spending?                                                                                                                 |
| <b>Interviewer's instructions</b> | [Asked if u=3 and ran30=1. ]                                                                                                                                                             |
| <b>Notes</b>                      | Norges forsvarsdepartement har foreslått en langsiktig plan for landets forsvar, der forsvarsutgiftene vil øke med mer                                                                   |

| Value | Label                              | Cases | Percentage |
|-------|------------------------------------|-------|------------|
| 1     | Very justified                     | 68    | 1.5%       |
| 2     | Somewhat justified                 | 64    | 1.4%       |
| 3     | Neither justified, nor unjustified | 14    | 0.3%       |
| 4     | Somewhat unjustified               | 19    | 0.4%       |
| 5     | Not at all justified               | 7     | 0.1%       |
| 6     | Do not know                        | 23    | 0.5%       |
| 7     | Not specified                      | 0     |            |
| 97    | No answer                          | 4     | 0.1%       |
| 98    | Not asked                          | 4490  | 95.8%      |

Warning: these figures indicate the number of cases found in the data file. They cannot be interpreted as summary statistics of the population of interest.

**# ocr7marinove6\_2: How justified is an increase in military spending: May provoke a russian troop buildup**

|                                   |                                                                                                                                                                                                                                                                                                                                    |
|-----------------------------------|------------------------------------------------------------------------------------------------------------------------------------------------------------------------------------------------------------------------------------------------------------------------------------------------------------------------------------|
| <b>Information</b>                | [Type= discrete] [Format=numeric] [Range= 1-7] [Missing=*]                                                                                                                                                                                                                                                                         |
| <b>Statistics [NW/ W]</b>         | [Valid=4689 /-] [Invalid=0 /-]                                                                                                                                                                                                                                                                                                     |
| <b>Pre-question</b>               | Norway's Ministry of Defense has proposed a Long Term Plan for the country's military under which defense spending will increase by more than NOK 160 billion over the next two decades. Such an increase may provoke a troop buildup by Russia on its Western borders as a defensive reaction to Norway's increased capabilities. |
| <b>Literal question</b>           | In your view, how justified is such a big increase in military spending?                                                                                                                                                                                                                                                           |
| <b>Interviewer's instructions</b> | [Asked if u=3 and ran30=2. ]                                                                                                                                                                                                                                                                                                       |
| <b>Notes</b>                      | Norges forsvarsdepartement har foreslått en langsiktig plan for landets forsvar, der forsvarsutgiftene vil øke med mer                                                                                                                                                                                                             |

# ocr7marinove6\_2: How justified is an increase in military spending: May provoke a russian troop buildup

| Value | Label                              | Cases | Percentage |
|-------|------------------------------------|-------|------------|
| 1     | Very justified                     | 49    | 1.0%       |
| 2     | Somewhat justified                 | 67    | 1.4%       |
| 3     | Neither justified, nor unjustified | 26    | 0.6%       |
| 4     | Somewhat unjustified               | 25    | 0.5%       |
| 5     | Not at all justified               | 15    | 0.3%       |
| 6     | Do not know                        | 25    | 0.5%       |
| 7     | Not specified                      | 1     | 0.0%       |
| 97    | No answer                          | 1     | 0.0%       |
| 98    | Not asked                          | 4480  | 95.5%      |

Warning: these figures indicate the number of cases found in the data file. They cannot be interpreted as summary statistics of the population of interest.

### # ocr7marinove6\_3: How justified is an increase in military spending: May provoke a russian troop buildup, warned by Lavrov

|                                   |                                                                                                                                                                                                                                                                                                                                                                                    |
|-----------------------------------|------------------------------------------------------------------------------------------------------------------------------------------------------------------------------------------------------------------------------------------------------------------------------------------------------------------------------------------------------------------------------------|
| <b>Information</b>                | [Type= discrete] [Format=numeric] [Range= 1-7] [Missing=*]                                                                                                                                                                                                                                                                                                                         |
| <b>Statistics [NW/ W]</b>         | [Valid=4689 /-] [Invalid=0 /-]                                                                                                                                                                                                                                                                                                                                                     |
| <b>Pre-question</b>               | Norway's Ministry of Defense has proposed a Long Term Plan for the country's military under which defense spending will increase by more than NOK 160 billion over the next two decades. Russian foreign minister Lavrov has warned that such an increase may provoke a troop buildup by Russia on its Western borders as a defensive reaction to Norway's increased capabilities. |
| <b>Literal question</b>           | In your view, how justified is such a big increase in military spending?                                                                                                                                                                                                                                                                                                           |
| <b>Interviewer's instructions</b> | [Asked if u=3 and ran30=3. ]                                                                                                                                                                                                                                                                                                                                                       |
| <b>Notes</b>                      | Norges forsvarsdepartement har foreslått en langsiktig plan for landets forsvar, der forsvarsutgiftene vil øke med mer                                                                                                                                                                                                                                                             |

| Value | Label                              | Cases | Percentage |
|-------|------------------------------------|-------|------------|
| 1     | Very justified                     | 52    | 1.1%       |
| 2     | Somewhat justified                 | 74    | 1.6%       |
| 3     | Neither justified, nor unjustified | 22    | 0.5%       |
| 4     | Somewhat unjustified               | 29    | 0.6%       |
| 5     | Not at all justified               | 12    | 0.3%       |
| 6     | Do not know                        | 34    | 0.7%       |
| 7     | Not specified                      | 0     |            |
| 97    | No answer                          | 1     | 0.0%       |
| 98    | Not asked                          | 4465  | 95.2%      |

Warning: these figures indicate the number of cases found in the data file. They cannot be interpreted as summary statistics of the population of interest.

### # ocr7marinove6\_4: How justified is an increase in military spending: Necessary response to the Baltic Sea region

|                                   |                                                                                                                                                                                                                                                                                                                                            |
|-----------------------------------|--------------------------------------------------------------------------------------------------------------------------------------------------------------------------------------------------------------------------------------------------------------------------------------------------------------------------------------------|
| <b>Information</b>                | [Type= discrete] [Format=numeric] [Range= 1-7] [Missing=*]                                                                                                                                                                                                                                                                                 |
| <b>Statistics [NW/ W]</b>         | [Valid=4689 /-] [Invalid=0 /-]                                                                                                                                                                                                                                                                                                             |
| <b>Pre-question</b>               | Norway's Ministry of Defense has proposed a Long Term Plan for the country's military under which defense spending will increase by more than NOK 160 billion over the next two decades. The measures are a necessary response to Russia's growing military presence in the Baltic Sea region and to the deteriorating security situation. |
| <b>Literal question</b>           | In your view, how justified is such a big increase in military spending?                                                                                                                                                                                                                                                                   |
| <b>Interviewer's instructions</b> | [Asked if u=3 and ran30=4. ]                                                                                                                                                                                                                                                                                                               |
| <b>Notes</b>                      | Norges forsvarsdepartement har foreslått en langsiktig plan for landets forsvar, der forsvarsutgiftene vil øke med mer                                                                                                                                                                                                                     |

| Value | Label                              | Cases | Percentage |
|-------|------------------------------------|-------|------------|
| 1     | Very justified                     | 88    | 1.9%       |
| 2     | Somewhat justified                 | 60    | 1.3%       |
| 3     | Neither justified, nor unjustified | 11    | 0.2%       |
| 4     | Somewhat unjustified               | 21    | 0.4%       |
| 5     | Not at all justified               | 12    | 0.3%       |
| 6     | Do not know                        | 16    | 0.3%       |
| 7     | Not specified                      | 0     |            |
| 97    | No answer                          | 6     | 0.1%       |
| 98    | Not asked                          | 4475  | 95.4%      |

Warning: these figures indicate the number of cases found in the data file. They cannot be interpreted as summary statistics of the population of interest.

### # ocr7marinove6\_5: How justified is an increase in military spending: Necessary response to the Baltic Sea region, argued by Norwegian security experts

|                           |                                                            |
|---------------------------|------------------------------------------------------------|
| <b>Information</b>        | [Type= discrete] [Format=numeric] [Range= 1-7] [Missing=*] |
| <b>Statistics [NW/ W]</b> | [Valid=4689 /-] [Invalid=0 /-]                             |

# # ocr7marinove6\_5: How justified is an increase in military spending: Necessary response to the Baltic Sea region, argued by Norwegian security experts

|                                   |                                                                                                                                                                                                                                                                                                                                                                                            |
|-----------------------------------|--------------------------------------------------------------------------------------------------------------------------------------------------------------------------------------------------------------------------------------------------------------------------------------------------------------------------------------------------------------------------------------------|
| <b>Pre-question</b>               | Norway's Ministry of Defense has proposed a Long Term Plan for the country's military under which defense spending will increase by more than NOK 160 billion over the next two decades. Norwegian security experts have argued that such an increase is necessary to response to Russia's growing military presence in the Baltic Sea region and to the deteriorating security situation. |
| <b>Literal question</b>           | In your view, how justified is such a big increase in military spending?                                                                                                                                                                                                                                                                                                                   |
| <b>Interviewer's instructions</b> | [Asked if u=3 and ran30=5. ]                                                                                                                                                                                                                                                                                                                                                               |
| <b>Notes</b>                      | Norges forsvarsdepartement har foreslått en langsiktig plan for landets forsvar, der forsvarsutgiftene vil øke med mer                                                                                                                                                                                                                                                                     |

| Value | Label                              | Cases | Percentage |
|-------|------------------------------------|-------|------------|
| 1     | Very justified                     | 81    | 1.7%       |
| 2     | Somewhat justified                 | 85    | 1.8%       |
| 3     | Neither justified, nor unjustified | 21    | 0.4%       |
| 4     | Somewhat unjustified               | 13    | 0.3%       |
| 5     | Not at all justified               | 8     | 0.2%       |
| 6     | Do not know                        | 18    | 0.4%       |
| 7     | Not specified                      | 2     | 0.0%       |
| 97    | No answer                          | 4     | 0.1%       |
| 98    | Not asked                          | 4457  | 95.1%      |

Warning: these figures indicate the number of cases found in the data file. They cannot be interpreted as summary statistics of the population of interest.

## # r7randomizedblockorder: randomizedBlockOrder

|                                   |                                                     |
|-----------------------------------|-----------------------------------------------------|
| <b>Information</b>                | [Type= discrete] [Format=character] [Missing=*]     |
| <b>Statistics [NW/ W]</b>         | [Valid=4689 /-] [Invalid=0 /-]                      |
| <b>Interviewer's instructions</b> | [Stores the order which OCR7MarinovE1-E6 is asked.] |

| Value            | Label | Cases | Percentage |
|------------------|-------|-------|------------|
|                  |       | 3611  | 77.0%      |
| E1,E2,E3,E4,E5,E |       | 1     | 0.0%       |
| E1,E2,E3,E4,E6,E |       | 4     | 0.1%       |
| E1,E2,E3,E5,E6,E |       | 2     | 0.0%       |
| E1,E2,E3,E6,E4,E |       | 1     | 0.0%       |
| E1,E2,E4,E3,E5,E |       | 2     | 0.0%       |
| E1,E2,E4,E5,E6,E |       | 1     | 0.0%       |
| E1,E2,E4,E6,E5,E |       | 3     | 0.1%       |
| E1,E2,E5,E3,E4,E |       | 1     | 0.0%       |
| E1,E2,E5,E3,E6,E |       | 3     | 0.1%       |
| E1,E2,E5,E4,E3,E |       | 5     | 0.1%       |
| E1,E2,E5,E4,E6,E |       | 1     | 0.0%       |
| E1,E2,E5,E6,E3,E |       | 2     | 0.0%       |
| E1,E2,E5,E6,E4,E |       | 4     | 0.1%       |
| E1,E2,E6,E3,E4,E |       | 1     | 0.0%       |
| E1,E2,E6,E3,E5,E |       | 1     | 0.0%       |
| E1,E2,E6,E5,E3,E |       | 1     | 0.0%       |
| E1,E2,E6,E5,E4,E |       | 2     | 0.0%       |
| E1,E3,E2,E4,E5,E |       | 2     | 0.0%       |
| E1,E3,E2,E4,E6,E |       | 2     | 0.0%       |
| E1,E3,E2,E5,E6,E |       | 3     | 0.1%       |
| E1,E3,E2,E6,E5,E |       | 1     | 0.0%       |

| # r7randomizedblockorder: randomizedBlockOrder |       |       |            |
|------------------------------------------------|-------|-------|------------|
| Value                                          | Label | Cases | Percentage |
| E1,E3,E4,E2,E5,F                               |       | 3     | 0.1%       |
| E1,E3,E4,E2,E6,F                               |       | 1     | 0.0%       |
| E1,E3,E4,E5,E6,F                               |       | 2     | 0.0%       |
| E1,E3,E4,E6,E5,F                               |       | 5     | 0.1%       |
| E1,E3,E5,E2,E4,F                               |       | 2     | 0.0%       |
| E1,E3,E5,E4,E6,F                               |       | 2     | 0.0%       |
| E1,E3,E5,E6,E2,F                               |       | 1     | 0.0%       |
| E1,E3,E5,E6,E4,F                               |       | 2     | 0.0%       |
| E1,E3,E6,E2,E4,F                               |       | 1     | 0.0%       |
| E1,E3,E6,E4,E5,F                               |       | 1     | 0.0%       |
| E1,E3,E6,E5,E2,F                               |       | 4     | 0.1%       |
| E1,E4,E2,E3,E5,F                               |       | 2     | 0.0%       |
| E1,E4,E2,E3,E6,F                               |       | 2     | 0.0%       |
| E1,E4,E2,E5,E3,F                               |       | 4     | 0.1%       |
| E1,E4,E2,E5,E6,F                               |       | 2     | 0.0%       |
| E1,E4,E3,E2,E5,F                               |       | 2     | 0.0%       |
| E1,E4,E3,E5,E2,F                               |       | 1     | 0.0%       |
| E1,E4,E3,E5,E6,F                               |       | 1     | 0.0%       |
| E1,E4,E3,E6,E2,F                               |       | 3     | 0.1%       |
| E1,E4,E3,E6,E5,F                               |       | 2     | 0.0%       |
| E1,E4,E5,E2,E3,F                               |       | 2     | 0.0%       |
| E1,E4,E5,E2,E6,F                               |       | 1     | 0.0%       |
| E1,E4,E5,E3,E2,F                               |       | 3     | 0.1%       |
| E1,E4,E5,E3,E6,F                               |       | 3     | 0.1%       |
| E1,E4,E5,E6,E2,F                               |       | 1     | 0.0%       |
| E1,E4,E5,E6,E3,F                               |       | 1     | 0.0%       |
| E1,E4,E6,E2,E3,F                               |       | 2     | 0.0%       |
| E1,E4,E6,E3,E2,F                               |       | 2     | 0.0%       |
| E1,E4,E6,E3,E5,F                               |       | 1     | 0.0%       |
| E1,E4,E6,E5,E2,F                               |       | 1     | 0.0%       |
| E1,E4,E6,E5,E3,F                               |       | 3     | 0.1%       |
| E1,E5,E2,E3,E4,F                               |       | 2     | 0.0%       |
| E1,E5,E2,E3,E6,F                               |       | 1     | 0.0%       |
| E1,E5,E2,E4,E3,F                               |       | 2     | 0.0%       |
| E1,E5,E2,E4,E6,F                               |       | 2     | 0.0%       |
| E1,E5,E2,E6,E3,F                               |       | 2     | 0.0%       |
| E1,E5,E2,E6,E4,F                               |       | 1     | 0.0%       |
| E1,E5,E3,E2,E4,F                               |       | 2     | 0.0%       |
| E1,E5,E3,E2,E6,F                               |       | 1     | 0.0%       |
| E1,E5,E3,E4,E2,F                               |       | 4     | 0.1%       |
| E1,E5,E3,E6,E2,F                               |       | 1     | 0.0%       |
| E1,E5,E3,E6,E4,F                               |       | 1     | 0.0%       |
| E1,E5,E4,E2,E3,F                               |       | 5     | 0.1%       |
| E1,E5,E4,E3,E2,F                               |       | 3     | 0.1%       |
| E1,E5,E4,E3,E6,F                               |       | 1     | 0.0%       |

| # r7randomizedblockorder: randomizedBlockOrder |       |       |            |
|------------------------------------------------|-------|-------|------------|
| Value                                          | Label | Cases | Percentage |
| E1,E5,E4,E6,E2,F                               |       | 1     | 0.0%       |
| E1,E5,E4,E6,E3,F                               |       | 1     | 0.0%       |
| E1,E5,E6,E2,E3,F                               |       | 1     | 0.0%       |
| E1,E5,E6,E2,E4,F                               |       | 1     | 0.0%       |
| E1,E5,E6,E3,E4,F                               |       | 1     | 0.0%       |
| E1,E5,E6,E4,E3,F                               |       | 2     | 0.0%       |
| E1,E6,E2,E3,E4,F                               |       | 2     | 0.0%       |
| E1,E6,E2,E3,E5,F                               |       | 4     | 0.1%       |
| E1,E6,E2,E4,E5,F                               |       | 1     | 0.0%       |
| E1,E6,E3,E2,E4,F                               |       | 1     | 0.0%       |
| E1,E6,E3,E2,E5,F                               |       | 2     | 0.0%       |
| E1,E6,E3,E4,E2,F                               |       | 1     | 0.0%       |
| E1,E6,E3,E5,E2,F                               |       | 6     | 0.1%       |
| E1,E6,E3,E5,E4,F                               |       | 5     | 0.1%       |
| E1,E6,E4,E2,E3,F                               |       | 1     | 0.0%       |
| E1,E6,E4,E2,E5,F                               |       | 1     | 0.0%       |
| E1,E6,E4,E3,E2,F                               |       | 1     | 0.0%       |
| E1,E6,E4,E3,E5,F                               |       | 2     | 0.0%       |
| E1,E6,E4,E5,E2,F                               |       | 2     | 0.0%       |
| E1,E6,E4,E5,E3,F                               |       | 2     | 0.0%       |
| E1,E6,E5,E2,E4,F                               |       | 1     | 0.0%       |
| E1,E6,E5,E3,E2,F                               |       | 2     | 0.0%       |
| E1,E6,E5,E4,E2,F                               |       | 2     | 0.0%       |
| E1,E6,E5,E4,E3,F                               |       | 2     | 0.0%       |
| E2,E1,E3,E4,E5,F                               |       | 2     | 0.0%       |
| E2,E1,E3,E4,E6,F                               |       | 1     | 0.0%       |
| E2,E1,E3,E5,E4,F                               |       | 2     | 0.0%       |
| E2,E1,E3,E5,E6,F                               |       | 1     | 0.0%       |
| E2,E1,E3,E6,E4,F                               |       | 1     | 0.0%       |
| E2,E1,E3,E6,E5,F                               |       | 1     | 0.0%       |
| E2,E1,E4,E3,E5,F                               |       | 1     | 0.0%       |
| E2,E1,E4,E3,E6,F                               |       | 1     | 0.0%       |
| E2,E1,E4,E5,E3,F                               |       | 1     | 0.0%       |
| E2,E1,E4,E6,E5,F                               |       | 1     | 0.0%       |
| E2,E1,E5,E3,E4,F                               |       | 1     | 0.0%       |
| E2,E1,E5,E3,E6,F                               |       | 1     | 0.0%       |
| E2,E1,E5,E4,E3,F                               |       | 2     | 0.0%       |
| E2,E1,E5,E6,E4,F                               |       | 1     | 0.0%       |
| E2,E1,E6,E3,E4,F                               |       | 1     | 0.0%       |
| E2,E1,E6,E4,E3,F                               |       | 4     | 0.1%       |
| E2,E1,E6,E4,E5,F                               |       | 1     | 0.0%       |
| E2,E1,E6,E5,E3,F                               |       | 1     | 0.0%       |
| E2,E3,E1,E4,E5,F                               |       | 2     | 0.0%       |
| E2,E3,E1,E5,E4,F                               |       | 4     | 0.1%       |
| E2,E3,E1,E6,E4,F                               |       | 1     | 0.0%       |



| # r7randomizedblockorder: randomizedBlockOrder |       |       |            |
|------------------------------------------------|-------|-------|------------|
| Value                                          | Label | Cases | Percentage |
| E2,E3,E4,E1,E5,F                               |       | 2     | 0.0%       |
| E2,E3,E4,E1,E6,F                               |       | 2     | 0.0%       |
| E2,E3,E4,E5,E1,F                               |       | 2     | 0.0%       |
| E2,E3,E4,E6,E1,F                               |       | 1     | 0.0%       |
| E2,E3,E5,E1,E4,F                               |       | 1     | 0.0%       |
| E2,E3,E5,E1,E6,F                               |       | 3     | 0.1%       |
| E2,E3,E5,E4,E6,F                               |       | 2     | 0.0%       |
| E2,E3,E5,E6,E1,F                               |       | 2     | 0.0%       |
| E2,E3,E5,E6,E4,F                               |       | 3     | 0.1%       |
| E2,E3,E6,E1,E4,F                               |       | 1     | 0.0%       |
| E2,E3,E6,E1,E5,F                               |       | 3     | 0.1%       |
| E2,E3,E6,E4,E5,F                               |       | 3     | 0.1%       |
| E2,E3,E6,E5,E1,F                               |       | 4     | 0.1%       |
| E2,E4,E1,E3,E5,F                               |       | 1     | 0.0%       |
| E2,E4,E1,E3,E6,F                               |       | 3     | 0.1%       |
| E2,E4,E1,E5,E3,F                               |       | 1     | 0.0%       |
| E2,E4,E1,E5,E6,F                               |       | 3     | 0.1%       |
| E2,E4,E1,E6,E3,F                               |       | 1     | 0.0%       |
| E2,E4,E1,E6,E5,F                               |       | 1     | 0.0%       |
| E2,E4,E3,E1,E5,F                               |       | 2     | 0.0%       |
| E2,E4,E3,E5,E6,F                               |       | 2     | 0.0%       |
| E2,E4,E3,E6,E5,F                               |       | 1     | 0.0%       |
| E2,E4,E5,E1,E6,F                               |       | 2     | 0.0%       |
| E2,E4,E5,E6,E1,F                               |       | 1     | 0.0%       |
| E2,E4,E5,E6,E3,F                               |       | 2     | 0.0%       |
| E2,E4,E6,E1,E5,F                               |       | 3     | 0.1%       |
| E2,E4,E6,E3,E5,F                               |       | 1     | 0.0%       |
| E2,E4,E6,E5,E1,F                               |       | 1     | 0.0%       |
| E2,E4,E6,E5,E3,F                               |       | 2     | 0.0%       |
| E2,E5,E1,E3,E4,F                               |       | 3     | 0.1%       |
| E2,E5,E1,E4,E6,F                               |       | 1     | 0.0%       |
| E2,E5,E1,E6,E3,F                               |       | 2     | 0.0%       |
| E2,E5,E3,E1,E6,F                               |       | 2     | 0.0%       |
| E2,E5,E3,E4,E1,F                               |       | 2     | 0.0%       |
| E2,E5,E3,E6,E1,F                               |       | 1     | 0.0%       |
| E2,E5,E3,E6,E4,F                               |       | 1     | 0.0%       |
| E2,E5,E4,E1,E3,F                               |       | 2     | 0.0%       |
| E2,E5,E4,E1,E6,F                               |       | 1     | 0.0%       |
| E2,E5,E4,E3,E1,F                               |       | 4     | 0.1%       |
| E2,E5,E4,E3,E6,F                               |       | 2     | 0.0%       |
| E2,E5,E4,E6,E1,F                               |       | 2     | 0.0%       |
| E2,E5,E4,E6,E3,F                               |       | 1     | 0.0%       |
| E2,E5,E6,E1,E4,F                               |       | 4     | 0.1%       |
| E2,E5,E6,E3,E1,F                               |       | 2     | 0.0%       |
| E2,E5,E6,E3,E4,F                               |       | 1     | 0.0%       |

| # r7randomizedblockorder: randomizedBlockOrder |       |       |            |
|------------------------------------------------|-------|-------|------------|
| Value                                          | Label | Cases | Percentage |
| E2,E5,E6,E4,E1,F                               |       | 3     | 0.1%       |
| E2,E5,E6,E4,E3,F                               |       | 1     | 0.0%       |
| E2,E6,E1,E3,E4,F                               |       | 4     | 0.1%       |
| E2,E6,E1,E3,E5,F                               |       | 2     | 0.0%       |
| E2,E6,E1,E4,E3,F                               |       | 1     | 0.0%       |
| E2,E6,E1,E5,E3,F                               |       | 4     | 0.1%       |
| E2,E6,E1,E5,E4,F                               |       | 3     | 0.1%       |
| E2,E6,E3,E1,E5,F                               |       | 2     | 0.0%       |
| E2,E6,E3,E4,E5,F                               |       | 3     | 0.1%       |
| E2,E6,E3,E5,E1,F                               |       | 4     | 0.1%       |
| E2,E6,E3,E5,E4,F                               |       | 1     | 0.0%       |
| E2,E6,E4,E1,E5,F                               |       | 2     | 0.0%       |
| E2,E6,E4,E5,E3,F                               |       | 2     | 0.0%       |
| E2,E6,E5,E1,E3,F                               |       | 1     | 0.0%       |
| E2,E6,E5,E1,E4,F                               |       | 2     | 0.0%       |
| E2,E6,E5,E3,E1,F                               |       | 1     | 0.0%       |
| E2,E6,E5,E3,E4,F                               |       | 1     | 0.0%       |
| E2,E6,E5,E4,E1,F                               |       | 2     | 0.0%       |
| E2,E6,E5,E4,E3,F                               |       | 1     | 0.0%       |
| E3,E1,E2,E4,E5,F                               |       | 3     | 0.1%       |
| E3,E1,E2,E4,E6,F                               |       | 1     | 0.0%       |
| E3,E1,E2,E5,E4,F                               |       | 5     | 0.1%       |
| E3,E1,E2,E5,E6,F                               |       | 3     | 0.1%       |
| E3,E1,E2,E6,E4,F                               |       | 1     | 0.0%       |
| E3,E1,E2,E6,E5,F                               |       | 4     | 0.1%       |
| E3,E1,E4,E2,E5,F                               |       | 1     | 0.0%       |
| E3,E1,E4,E2,E6,F                               |       | 1     | 0.0%       |
| E3,E1,E4,E5,E2,F                               |       | 2     | 0.0%       |
| E3,E1,E4,E5,E6,F                               |       | 1     | 0.0%       |
| E3,E1,E4,E6,E2,F                               |       | 2     | 0.0%       |
| E3,E1,E5,E2,E6,F                               |       | 3     | 0.1%       |
| E3,E1,E5,E4,E6,F                               |       | 3     | 0.1%       |
| E3,E1,E6,E2,E4,F                               |       | 1     | 0.0%       |
| E3,E1,E6,E2,E5,F                               |       | 2     | 0.0%       |
| E3,E1,E6,E4,E2,F                               |       | 2     | 0.0%       |
| E3,E1,E6,E4,E5,F                               |       | 1     | 0.0%       |
| E3,E2,E1,E4,E6,F                               |       | 2     | 0.0%       |
| E3,E2,E1,E5,E4,F                               |       | 1     | 0.0%       |
| E3,E2,E1,E5,E6,F                               |       | 1     | 0.0%       |
| E3,E2,E1,E6,E4,F                               |       | 1     | 0.0%       |
| E3,E2,E1,E6,E5,F                               |       | 2     | 0.0%       |
| E3,E2,E4,E1,E5,F                               |       | 1     | 0.0%       |
| E3,E2,E4,E1,E6,F                               |       | 4     | 0.1%       |
| E3,E2,E4,E5,E6,F                               |       | 2     | 0.0%       |
| E3,E2,E4,E6,E1,F                               |       | 2     | 0.0%       |

| # r7randomizedblockorder: randomizedBlockOrder |       |       |            |
|------------------------------------------------|-------|-------|------------|
| Value                                          | Label | Cases | Percentage |
| E3,E2,E4,E6,E5,F                               |       | 1     | 0.0%       |
| E3,E2,E5,E1,E4,F                               |       | 2     | 0.0%       |
| E3,E2,E5,E1,E6,F                               |       | 4     | 0.1%       |
| E3,E2,E5,E4,E1,F                               |       | 1     | 0.0%       |
| E3,E2,E5,E6,E4,F                               |       | 1     | 0.0%       |
| E3,E2,E6,E1,E4,F                               |       | 2     | 0.0%       |
| E3,E2,E6,E1,E5,F                               |       | 1     | 0.0%       |
| E3,E2,E6,E4,E1,F                               |       | 5     | 0.1%       |
| E3,E2,E6,E4,E5,F                               |       | 1     | 0.0%       |
| E3,E2,E6,E5,E1,F                               |       | 1     | 0.0%       |
| E3,E2,E6,E5,E4,F                               |       | 3     | 0.1%       |
| E3,E4,E1,E2,E5,F                               |       | 3     | 0.1%       |
| E3,E4,E1,E5,E6,F                               |       | 3     | 0.1%       |
| E3,E4,E1,E6,E2,F                               |       | 3     | 0.1%       |
| E3,E4,E2,E5,E1,F                               |       | 1     | 0.0%       |
| E3,E4,E2,E6,E5,F                               |       | 1     | 0.0%       |
| E3,E4,E5,E1,E2,F                               |       | 2     | 0.0%       |
| E3,E4,E5,E1,E6,F                               |       | 4     | 0.1%       |
| E3,E4,E5,E2,E1,F                               |       | 1     | 0.0%       |
| E3,E4,E5,E2,E6,F                               |       | 2     | 0.0%       |
| E3,E4,E5,E6,E1,F                               |       | 1     | 0.0%       |
| E3,E4,E6,E1,E2,F                               |       | 2     | 0.0%       |
| E3,E4,E6,E1,E5,F                               |       | 3     | 0.1%       |
| E3,E4,E6,E5,E1,F                               |       | 2     | 0.0%       |
| E3,E5,E1,E2,E4,F                               |       | 3     | 0.1%       |
| E3,E5,E1,E4,E2,F                               |       | 2     | 0.0%       |
| E3,E5,E1,E4,E6,F                               |       | 3     | 0.1%       |
| E3,E5,E1,E6,E2,F                               |       | 2     | 0.0%       |
| E3,E5,E1,E6,E4,F                               |       | 2     | 0.0%       |
| E3,E5,E2,E1,E4,F                               |       | 1     | 0.0%       |
| E3,E5,E2,E4,E1,F                               |       | 3     | 0.1%       |
| E3,E5,E2,E6,E1,F                               |       | 1     | 0.0%       |
| E3,E5,E2,E6,E4,F                               |       | 3     | 0.1%       |
| E3,E5,E4,E2,E1,F                               |       | 3     | 0.1%       |
| E3,E5,E4,E2,E6,F                               |       | 1     | 0.0%       |
| E3,E5,E4,E6,E1,F                               |       | 2     | 0.0%       |
| E3,E5,E4,E6,E2,F                               |       | 3     | 0.1%       |
| E3,E5,E6,E1,E2,F                               |       | 1     | 0.0%       |
| E3,E5,E6,E1,E4,F                               |       | 2     | 0.0%       |
| E3,E5,E6,E2,E1,F                               |       | 2     | 0.0%       |
| E3,E5,E6,E2,E4,F                               |       | 3     | 0.1%       |
| E3,E5,E6,E4,E1,F                               |       | 3     | 0.1%       |
| E3,E5,E6,E4,E2,F                               |       | 2     | 0.0%       |
| E3,E6,E1,E2,E4,F                               |       | 4     | 0.1%       |
| E3,E6,E1,E4,E2,F                               |       | 1     | 0.0%       |

| # r7randomizedblockorder: randomizedBlockOrder |       |       |            |
|------------------------------------------------|-------|-------|------------|
| Value                                          | Label | Cases | Percentage |
| E3,E6,E1,E4,E5,F                               |       | 2     | 0.0%       |
| E3,E6,E1,E5,E2,F                               |       | 1     | 0.0%       |
| E3,E6,E1,E5,E4,F                               |       | 1     | 0.0%       |
| E3,E6,E2,E1,E5,F                               |       | 2     | 0.0%       |
| E3,E6,E2,E4,E1,F                               |       | 3     | 0.1%       |
| E3,E6,E2,E5,E1,F                               |       | 1     | 0.0%       |
| E3,E6,E2,E5,E4,F                               |       | 2     | 0.0%       |
| E3,E6,E4,E1,E2,F                               |       | 1     | 0.0%       |
| E3,E6,E4,E1,E5,F                               |       | 3     | 0.1%       |
| E3,E6,E4,E2,E1,F                               |       | 1     | 0.0%       |
| E3,E6,E4,E2,E5,F                               |       | 2     | 0.0%       |
| E3,E6,E4,E5,E1,F                               |       | 1     | 0.0%       |
| E3,E6,E4,E5,E2,F                               |       | 1     | 0.0%       |
| E3,E6,E5,E1,E2,F                               |       | 2     | 0.0%       |
| E3,E6,E5,E1,E4,F                               |       | 2     | 0.0%       |
| E3,E6,E5,E2,E1,F                               |       | 1     | 0.0%       |
| E3,E6,E5,E4,E1,F                               |       | 4     | 0.1%       |
| E3,E6,E5,E4,E2,F                               |       | 1     | 0.0%       |
| E4,E1,E2,E3,E5,F                               |       | 1     | 0.0%       |
| E4,E1,E2,E3,E6,F                               |       | 3     | 0.1%       |
| E4,E1,E2,E5,E3,F                               |       | 1     | 0.0%       |
| E4,E1,E2,E5,E6,F                               |       | 2     | 0.0%       |
| E4,E1,E2,E6,E3,F                               |       | 1     | 0.0%       |
| E4,E1,E2,E6,E5,F                               |       | 3     | 0.1%       |
| E4,E1,E3,E2,E5,F                               |       | 1     | 0.0%       |
| E4,E1,E3,E2,E6,F                               |       | 7     | 0.1%       |
| E4,E1,E3,E5,E2,F                               |       | 1     | 0.0%       |
| E4,E1,E3,E6,E5,F                               |       | 1     | 0.0%       |
| E4,E1,E5,E2,E3,F                               |       | 1     | 0.0%       |
| E4,E1,E5,E2,E6,F                               |       | 4     | 0.1%       |
| E4,E1,E5,E3,E2,F                               |       | 1     | 0.0%       |
| E4,E1,E5,E6,E2,F                               |       | 1     | 0.0%       |
| E4,E1,E6,E2,E3,F                               |       | 1     | 0.0%       |
| E4,E1,E6,E2,E5,F                               |       | 2     | 0.0%       |
| E4,E1,E6,E3,E5,F                               |       | 3     | 0.1%       |
| E4,E1,E6,E5,E2,F                               |       | 2     | 0.0%       |
| E4,E2,E1,E3,E5,F                               |       | 2     | 0.0%       |
| E4,E2,E1,E3,E6,F                               |       | 2     | 0.0%       |
| E4,E2,E1,E5,E3,F                               |       | 4     | 0.1%       |
| E4,E2,E1,E6,E3,F                               |       | 3     | 0.1%       |
| E4,E2,E3,E1,E6,F                               |       | 4     | 0.1%       |
| E4,E2,E3,E5,E1,F                               |       | 4     | 0.1%       |
| E4,E2,E3,E5,E6,F                               |       | 1     | 0.0%       |
| E4,E2,E3,E6,E1,F                               |       | 3     | 0.1%       |
| E4,E2,E3,E6,E5,F                               |       | 2     | 0.0%       |

| # r7randomizedblockorder: randomizedBlockOrder |       |       |            |
|------------------------------------------------|-------|-------|------------|
| Value                                          | Label | Cases | Percentage |
| E4,E2,E5,E1,E6,F                               |       | 1     | 0.0%       |
| E4,E2,E5,E3,E1,F                               |       | 1     | 0.0%       |
| E4,E2,E5,E3,E6,F                               |       | 1     | 0.0%       |
| E4,E2,E5,E6,E3,F                               |       | 3     | 0.1%       |
| E4,E2,E6,E1,E3,F                               |       | 1     | 0.0%       |
| E4,E2,E6,E1,E5,F                               |       | 3     | 0.1%       |
| E4,E2,E6,E3,E5,F                               |       | 1     | 0.0%       |
| E4,E2,E6,E5,E1,F                               |       | 2     | 0.0%       |
| E4,E2,E6,E5,E3,F                               |       | 1     | 0.0%       |
| E4,E3,E1,E2,E6,F                               |       | 1     | 0.0%       |
| E4,E3,E1,E5,E2,F                               |       | 2     | 0.0%       |
| E4,E3,E1,E6,E2,F                               |       | 2     | 0.0%       |
| E4,E3,E1,E6,E5,F                               |       | 3     | 0.1%       |
| E4,E3,E2,E1,E5,F                               |       | 4     | 0.1%       |
| E4,E3,E2,E5,E1,F                               |       | 4     | 0.1%       |
| E4,E3,E2,E6,E1,F                               |       | 1     | 0.0%       |
| E4,E3,E5,E1,E2,F                               |       | 4     | 0.1%       |
| E4,E3,E5,E1,E6,F                               |       | 1     | 0.0%       |
| E4,E3,E5,E2,E1,F                               |       | 1     | 0.0%       |
| E4,E3,E5,E2,E6,F                               |       | 2     | 0.0%       |
| E4,E3,E5,E6,E1,F                               |       | 1     | 0.0%       |
| E4,E3,E5,E6,E2,F                               |       | 1     | 0.0%       |
| E4,E3,E6,E1,E2,F                               |       | 2     | 0.0%       |
| E4,E3,E6,E2,E1,F                               |       | 1     | 0.0%       |
| E4,E3,E6,E2,E5,F                               |       | 1     | 0.0%       |
| E4,E3,E6,E5,E1,F                               |       | 1     | 0.0%       |
| E4,E3,E6,E5,E2,F                               |       | 2     | 0.0%       |
| E4,E5,E1,E2,E6,F                               |       | 2     | 0.0%       |
| E4,E5,E1,E3,E2,F                               |       | 1     | 0.0%       |
| E4,E5,E1,E3,E6,F                               |       | 2     | 0.0%       |
| E4,E5,E1,E6,E3,F                               |       | 2     | 0.0%       |
| E4,E5,E2,E1,E3,F                               |       | 2     | 0.0%       |
| E4,E5,E2,E1,E6,F                               |       | 3     | 0.1%       |
| E4,E5,E2,E3,E1,F                               |       | 4     | 0.1%       |
| E4,E5,E2,E3,E6,F                               |       | 2     | 0.0%       |
| E4,E5,E2,E6,E1,F                               |       | 1     | 0.0%       |
| E4,E5,E2,E6,E3,F                               |       | 2     | 0.0%       |
| E4,E5,E3,E1,E2,F                               |       | 2     | 0.0%       |
| E4,E5,E3,E1,E6,F                               |       | 3     | 0.1%       |
| E4,E5,E3,E2,E1,F                               |       | 3     | 0.1%       |
| E4,E5,E3,E2,E6,F                               |       | 2     | 0.0%       |
| E4,E5,E3,E6,E1,F                               |       | 1     | 0.0%       |
| E4,E5,E3,E6,E2,F                               |       | 2     | 0.0%       |
| E4,E5,E6,E1,E2,F                               |       | 2     | 0.0%       |
| E4,E5,E6,E1,E3,F                               |       | 2     | 0.0%       |

| # r7randomizedblockorder: randomizedBlockOrder |       |       |            |
|------------------------------------------------|-------|-------|------------|
| Value                                          | Label | Cases | Percentage |
| E4,E5,E6,E2,E3,F                               |       | 3     | 0.1%       |
| E4,E5,E6,E3,E1,F                               |       | 1     | 0.0%       |
| E4,E5,E6,E3,E2,F                               |       | 1     | 0.0%       |
| E4,E6,E1,E2,E5,F                               |       | 2     | 0.0%       |
| E4,E6,E1,E5,E3,F                               |       | 1     | 0.0%       |
| E4,E6,E2,E1,E3,F                               |       | 1     | 0.0%       |
| E4,E6,E2,E1,E5,F                               |       | 1     | 0.0%       |
| E4,E6,E2,E3,E1,F                               |       | 2     | 0.0%       |
| E4,E6,E2,E5,E1,F                               |       | 3     | 0.1%       |
| E4,E6,E2,E5,E3,F                               |       | 1     | 0.0%       |
| E4,E6,E3,E1,E2,F                               |       | 1     | 0.0%       |
| E4,E6,E3,E1,E5,F                               |       | 1     | 0.0%       |
| E4,E6,E3,E2,E1,F                               |       | 6     | 0.1%       |
| E4,E6,E3,E2,E5,F                               |       | 4     | 0.1%       |
| E4,E6,E3,E5,E1,F                               |       | 1     | 0.0%       |
| E4,E6,E3,E5,E2,F                               |       | 2     | 0.0%       |
| E4,E6,E5,E1,E2,F                               |       | 3     | 0.1%       |
| E4,E6,E5,E1,E3,F                               |       | 2     | 0.0%       |
| E4,E6,E5,E2,E1,F                               |       | 2     | 0.0%       |
| E4,E6,E5,E2,E3,F                               |       | 1     | 0.0%       |
| E4,E6,E5,E3,E1,F                               |       | 2     | 0.0%       |
| E4,E6,E5,E3,E2,F                               |       | 4     | 0.1%       |
| E5,E1,E2,E3,E4,F                               |       | 4     | 0.1%       |
| E5,E1,E2,E3,E6,F                               |       | 1     | 0.0%       |
| E5,E1,E2,E4,E3,F                               |       | 1     | 0.0%       |
| E5,E1,E2,E4,E6,F                               |       | 2     | 0.0%       |
| E5,E1,E2,E6,E3,F                               |       | 1     | 0.0%       |
| E5,E1,E2,E6,E4,F                               |       | 2     | 0.0%       |
| E5,E1,E3,E2,E6,F                               |       | 5     | 0.1%       |
| E5,E1,E3,E4,E6,F                               |       | 2     | 0.0%       |
| E5,E1,E3,E6,E2,F                               |       | 4     | 0.1%       |
| E5,E1,E3,E6,E4,F                               |       | 1     | 0.0%       |
| E5,E1,E4,E2,E3,F                               |       | 3     | 0.1%       |
| E5,E1,E4,E2,E6,F                               |       | 3     | 0.1%       |
| E5,E1,E4,E3,E2,F                               |       | 1     | 0.0%       |
| E5,E1,E4,E3,E6,F                               |       | 2     | 0.0%       |
| E5,E1,E4,E6,E2,F                               |       | 3     | 0.1%       |
| E5,E1,E4,E6,E3,F                               |       | 1     | 0.0%       |
| E5,E1,E6,E2,E3,F                               |       | 1     | 0.0%       |
| E5,E1,E6,E2,E4,F                               |       | 2     | 0.0%       |
| E5,E1,E6,E3,E2,F                               |       | 2     | 0.0%       |
| E5,E1,E6,E3,E4,F                               |       | 2     | 0.0%       |
| E5,E1,E6,E4,E2,F                               |       | 1     | 0.0%       |
| E5,E2,E1,E3,E4,F                               |       | 1     | 0.0%       |
| E5,E2,E1,E3,E6,F                               |       | 3     | 0.1%       |

| # r7randomizedblockorder: randomizedBlockOrder |       |       |            |
|------------------------------------------------|-------|-------|------------|
| Value                                          | Label | Cases | Percentage |
| E5,E2,E1,E4,E6,F                               |       | 1     | 0.0%       |
| E5,E2,E1,E6,E3,F                               |       | 3     | 0.1%       |
| E5,E2,E1,E6,E4,F                               |       | 2     | 0.0%       |
| E5,E2,E3,E1,E6,F                               |       | 1     | 0.0%       |
| E5,E2,E3,E4,E1,F                               |       | 2     | 0.0%       |
| E5,E2,E3,E4,E6,F                               |       | 3     | 0.1%       |
| E5,E2,E3,E6,E4,F                               |       | 3     | 0.1%       |
| E5,E2,E4,E3,E6,F                               |       | 2     | 0.0%       |
| E5,E2,E4,E6,E3,F                               |       | 1     | 0.0%       |
| E5,E2,E6,E1,E3,F                               |       | 2     | 0.0%       |
| E5,E2,E6,E1,E4,F                               |       | 4     | 0.1%       |
| E5,E2,E6,E3,E1,F                               |       | 2     | 0.0%       |
| E5,E2,E6,E3,E4,F                               |       | 2     | 0.0%       |
| E5,E2,E6,E4,E1,F                               |       | 1     | 0.0%       |
| E5,E3,E1,E2,E4,F                               |       | 1     | 0.0%       |
| E5,E3,E1,E2,E6,F                               |       | 1     | 0.0%       |
| E5,E3,E1,E4,E2,F                               |       | 2     | 0.0%       |
| E5,E3,E1,E4,E6,F                               |       | 1     | 0.0%       |
| E5,E3,E1,E6,E2,F                               |       | 4     | 0.1%       |
| E5,E3,E1,E6,E4,F                               |       | 1     | 0.0%       |
| E5,E3,E2,E1,E4,F                               |       | 3     | 0.1%       |
| E5,E3,E2,E4,E1,F                               |       | 6     | 0.1%       |
| E5,E3,E2,E6,E1,F                               |       | 1     | 0.0%       |
| E5,E3,E2,E6,E4,F                               |       | 3     | 0.1%       |
| E5,E3,E4,E1,E2,F                               |       | 1     | 0.0%       |
| E5,E3,E4,E1,E6,F                               |       | 1     | 0.0%       |
| E5,E3,E4,E2,E1,F                               |       | 2     | 0.0%       |
| E5,E3,E4,E2,E6,F                               |       | 1     | 0.0%       |
| E5,E3,E4,E6,E2,F                               |       | 2     | 0.0%       |
| E5,E3,E6,E1,E2,F                               |       | 2     | 0.0%       |
| E5,E3,E6,E1,E4,F                               |       | 1     | 0.0%       |
| E5,E3,E6,E2,E1,F                               |       | 5     | 0.1%       |
| E5,E3,E6,E2,E4,F                               |       | 2     | 0.0%       |
| E5,E3,E6,E4,E2,F                               |       | 3     | 0.1%       |
| E5,E4,E1,E2,E3,F                               |       | 1     | 0.0%       |
| E5,E4,E1,E2,E6,F                               |       | 1     | 0.0%       |
| E5,E4,E1,E3,E2,F                               |       | 2     | 0.0%       |
| E5,E4,E1,E6,E2,F                               |       | 4     | 0.1%       |
| E5,E4,E2,E1,E3,F                               |       | 3     | 0.1%       |
| E5,E4,E2,E1,E6,F                               |       | 3     | 0.1%       |
| E5,E4,E2,E3,E6,F                               |       | 2     | 0.0%       |
| E5,E4,E2,E6,E3,F                               |       | 4     | 0.1%       |
| E5,E4,E3,E1,E2,F                               |       | 1     | 0.0%       |
| E5,E4,E3,E1,E6,F                               |       | 2     | 0.0%       |
| E5,E4,E3,E2,E1,F                               |       | 1     | 0.0%       |

| # r7randomizedblockorder: randomizedBlockOrder |       |       |            |
|------------------------------------------------|-------|-------|------------|
| Value                                          | Label | Cases | Percentage |
| E5,E4,E3,E2,E6,E                               |       | 1     | 0.0%       |
| E5,E4,E3,E6,E1,E                               |       | 1     | 0.0%       |
| E5,E4,E3,E6,E2,E                               |       | 1     | 0.0%       |
| E5,E4,E6,E1,E2,E                               |       | 1     | 0.0%       |
| E5,E4,E6,E1,E3,E                               |       | 1     | 0.0%       |
| E5,E4,E6,E2,E1,E                               |       | 2     | 0.0%       |
| E5,E4,E6,E2,E3,E                               |       | 1     | 0.0%       |
| E5,E4,E6,E3,E1,E                               |       | 1     | 0.0%       |
| E5,E4,E6,E3,E2,E                               |       | 1     | 0.0%       |
| E5,E6,E1,E2,E3,E                               |       | 2     | 0.0%       |
| E5,E6,E1,E2,E4,E                               |       | 1     | 0.0%       |
| E5,E6,E1,E3,E2,E                               |       | 2     | 0.0%       |
| E5,E6,E1,E4,E2,E                               |       | 2     | 0.0%       |
| E5,E6,E1,E4,E3,E                               |       | 2     | 0.0%       |
| E5,E6,E2,E1,E3,E                               |       | 1     | 0.0%       |
| E5,E6,E2,E3,E4,E                               |       | 1     | 0.0%       |
| E5,E6,E2,E4,E1,E                               |       | 2     | 0.0%       |
| E5,E6,E2,E4,E3,E                               |       | 1     | 0.0%       |
| E5,E6,E3,E1,E2,E                               |       | 1     | 0.0%       |
| E5,E6,E3,E1,E4,E                               |       | 2     | 0.0%       |
| E5,E6,E3,E2,E1,E                               |       | 3     | 0.1%       |
| E5,E6,E3,E2,E4,E                               |       | 2     | 0.0%       |
| E5,E6,E3,E4,E1,E                               |       | 1     | 0.0%       |
| E5,E6,E3,E4,E2,E                               |       | 4     | 0.1%       |
| E5,E6,E4,E1,E3,E                               |       | 3     | 0.1%       |
| E5,E6,E4,E2,E1,E                               |       | 2     | 0.0%       |
| E5,E6,E4,E2,E3,E                               |       | 2     | 0.0%       |
| E5,E6,E4,E3,E1,E                               |       | 1     | 0.0%       |
| E5,E6,E4,E3,E2,E                               |       | 1     | 0.0%       |
| E6,E1,E2,E3,E4,E                               |       | 2     | 0.0%       |
| E6,E1,E2,E4,E3,E                               |       | 4     | 0.1%       |
| E6,E1,E2,E4,E5,E                               |       | 3     | 0.1%       |
| E6,E1,E2,E5,E3,E                               |       | 1     | 0.0%       |
| E6,E1,E2,E5,E4,E                               |       | 3     | 0.1%       |
| E6,E1,E3,E2,E4,E                               |       | 2     | 0.0%       |
| E6,E1,E3,E2,E5,E                               |       | 1     | 0.0%       |
| E6,E1,E3,E4,E2,E                               |       | 1     | 0.0%       |
| E6,E1,E3,E4,E5,E                               |       | 2     | 0.0%       |
| E6,E1,E3,E5,E2,E                               |       | 2     | 0.0%       |
| E6,E1,E3,E5,E4,E                               |       | 3     | 0.1%       |
| E6,E1,E4,E2,E5,E                               |       | 2     | 0.0%       |
| E6,E1,E4,E3,E2,E                               |       | 2     | 0.0%       |
| E6,E1,E4,E3,E5,E                               |       | 2     | 0.0%       |
| E6,E1,E4,E5,E2,E                               |       | 1     | 0.0%       |
| E6,E1,E4,E5,E3,E                               |       | 2     | 0.0%       |



| # r7randomizedblockorder: randomizedBlockOrder |       |       |            |
|------------------------------------------------|-------|-------|------------|
| Value                                          | Label | Cases | Percentage |
| E6,E1,E5,E2,E3,F                               |       | 1     | 0.0%       |
| E6,E1,E5,E2,E4,F                               |       | 1     | 0.0%       |
| E6,E1,E5,E3,E2,F                               |       | 1     | 0.0%       |
| E6,E1,E5,E3,E4,F                               |       | 2     | 0.0%       |
| E6,E1,E5,E4,E2,F                               |       | 1     | 0.0%       |
| E6,E1,E5,E4,E3,F                               |       | 1     | 0.0%       |
| E6,E2,E1,E3,E4,F                               |       | 2     | 0.0%       |
| E6,E2,E1,E3,E5,F                               |       | 2     | 0.0%       |
| E6,E2,E1,E4,E3,F                               |       | 1     | 0.0%       |
| E6,E2,E1,E4,E5,F                               |       | 1     | 0.0%       |
| E6,E2,E1,E5,E3,F                               |       | 2     | 0.0%       |
| E6,E2,E3,E1,E4,F                               |       | 2     | 0.0%       |
| E6,E2,E3,E1,E5,F                               |       | 3     | 0.1%       |
| E6,E2,E3,E4,E1,F                               |       | 5     | 0.1%       |
| E6,E2,E3,E4,E5,F                               |       | 2     | 0.0%       |
| E6,E2,E3,E5,E1,F                               |       | 2     | 0.0%       |
| E6,E2,E3,E5,E4,F                               |       | 3     | 0.1%       |
| E6,E2,E4,E1,E3,F                               |       | 2     | 0.0%       |
| E6,E2,E4,E3,E1,F                               |       | 1     | 0.0%       |
| E6,E2,E4,E3,E5,F                               |       | 1     | 0.0%       |
| E6,E2,E4,E5,E1,F                               |       | 2     | 0.0%       |
| E6,E2,E5,E1,E3,F                               |       | 2     | 0.0%       |
| E6,E2,E5,E1,E4,F                               |       | 1     | 0.0%       |
| E6,E2,E5,E3,E1,F                               |       | 4     | 0.1%       |
| E6,E2,E5,E3,E4,F                               |       | 1     | 0.0%       |
| E6,E2,E5,E4,E1,F                               |       | 3     | 0.1%       |
| E6,E2,E5,E4,E3,F                               |       | 2     | 0.0%       |
| E6,E3,E1,E2,E5,F                               |       | 1     | 0.0%       |
| E6,E3,E1,E4,E2,F                               |       | 2     | 0.0%       |
| E6,E3,E1,E4,E5,F                               |       | 5     | 0.1%       |
| E6,E3,E1,E5,E4,F                               |       | 1     | 0.0%       |
| E6,E3,E2,E1,E4,F                               |       | 2     | 0.0%       |
| E6,E3,E2,E1,E5,F                               |       | 1     | 0.0%       |
| E6,E3,E2,E4,E1,F                               |       | 3     | 0.1%       |
| E6,E3,E2,E5,E1,F                               |       | 2     | 0.0%       |
| E6,E3,E2,E5,E4,F                               |       | 1     | 0.0%       |
| E6,E3,E4,E1,E2,F                               |       | 1     | 0.0%       |
| E6,E3,E4,E2,E1,F                               |       | 2     | 0.0%       |
| E6,E3,E4,E5,E1,F                               |       | 2     | 0.0%       |
| E6,E3,E5,E1,E2,F                               |       | 2     | 0.0%       |
| E6,E3,E5,E2,E1,F                               |       | 2     | 0.0%       |
| E6,E3,E5,E2,E4,F                               |       | 1     | 0.0%       |
| E6,E3,E5,E4,E2,F                               |       | 2     | 0.0%       |
| E6,E4,E1,E2,E3,F                               |       | 2     | 0.0%       |
| E6,E4,E1,E2,E5,F                               |       | 2     | 0.0%       |

| # r7randomizedblockorder: randomizedBlockOrder                                                                                                              |                                                             |       |                   |
|-------------------------------------------------------------------------------------------------------------------------------------------------------------|-------------------------------------------------------------|-------|-------------------|
| Value                                                                                                                                                       | Label                                                       | Cases | Percentage        |
| E6,E4,E1,E3,E2,F                                                                                                                                            |                                                             | 3     | 0.1%              |
| E6,E4,E1,E3,E5,F                                                                                                                                            |                                                             | 1     | 0.0%              |
| E6,E4,E1,E5,E3,F                                                                                                                                            |                                                             | 1     | 0.0%              |
| E6,E4,E2,E1,E3,F                                                                                                                                            |                                                             | 4     | 0.1%              |
| E6,E4,E2,E1,E5,F                                                                                                                                            |                                                             | 3     | 0.1%              |
| E6,E4,E2,E3,E1,F                                                                                                                                            |                                                             | 3     | 0.1%              |
| E6,E4,E2,E3,E5,F                                                                                                                                            |                                                             | 2     | 0.0%              |
| E6,E4,E2,E5,E3,F                                                                                                                                            |                                                             | 2     | 0.0%              |
| E6,E4,E3,E1,E2,F                                                                                                                                            |                                                             | 1     | 0.0%              |
| E6,E4,E3,E1,E5,F                                                                                                                                            |                                                             | 2     | 0.0%              |
| E6,E4,E3,E2,E5,F                                                                                                                                            |                                                             | 2     | 0.0%              |
| E6,E4,E3,E5,E1,F                                                                                                                                            |                                                             | 2     | 0.0%              |
| E6,E4,E3,E5,E2,F                                                                                                                                            |                                                             | 2     | 0.0%              |
| E6,E4,E5,E2,E1,F                                                                                                                                            |                                                             | 2     | 0.0%              |
| E6,E4,E5,E2,E3,F                                                                                                                                            |                                                             | 1     | 0.0%              |
| E6,E4,E5,E3,E2,F                                                                                                                                            |                                                             | 1     | 0.0%              |
| E6,E5,E1,E2,E3,F                                                                                                                                            |                                                             | 2     | 0.0%              |
| E6,E5,E1,E2,E4,F                                                                                                                                            |                                                             | 3     | 0.1%              |
| E6,E5,E1,E3,E2,F                                                                                                                                            |                                                             | 2     | 0.0%              |
| E6,E5,E1,E3,E4,F                                                                                                                                            |                                                             | 3     | 0.1%              |
| E6,E5,E1,E4,E2,F                                                                                                                                            |                                                             | 3     | 0.1%              |
| E6,E5,E1,E4,E3,F                                                                                                                                            |                                                             | 2     | 0.0%              |
| E6,E5,E2,E1,E4,F                                                                                                                                            |                                                             | 1     | 0.0%              |
| E6,E5,E2,E3,E4,F                                                                                                                                            |                                                             | 2     | 0.0%              |
| E6,E5,E2,E4,E1,F                                                                                                                                            |                                                             | 1     | 0.0%              |
| E6,E5,E2,E4,E3,F                                                                                                                                            |                                                             | 3     | 0.1%              |
| E6,E5,E3,E1,E2,F                                                                                                                                            |                                                             | 1     | 0.0%              |
| E6,E5,E3,E1,E4,F                                                                                                                                            |                                                             | 1     | 0.0%              |
| E6,E5,E3,E2,E4,F                                                                                                                                            |                                                             | 2     | 0.0%              |
| E6,E5,E3,E4,E2,F                                                                                                                                            |                                                             | 1     | 0.0%              |
| E6,E5,E4,E1,E2,F                                                                                                                                            |                                                             | 1     | 0.0%              |
| E6,E5,E4,E2,E1,F                                                                                                                                            |                                                             | 1     | 0.0%              |
| Warning: these figures indicate the number of cases found in the data file. They cannot be interpreted as summary statistics of the population of interest. |                                                             |       |                   |
| # r7ocreasm_mobile2: R7OCRECSM_mobile2                                                                                                                      |                                                             |       |                   |
| Information                                                                                                                                                 | [Type= discrete] [Format=numeric] [Range= 0-1] [Missing=*]  |       |                   |
| Statistics [NW/ W]                                                                                                                                          | [Valid=1176 /-] [Invalid=3513 /-]                           |       |                   |
| Interviewer's instructions                                                                                                                                  | [Determines respondents device type.]                       |       |                   |
| Value                                                                                                                                                       | Label                                                       | Cases | Percentage        |
| 0                                                                                                                                                           | Mobile - no                                                 | 875   | <div></div> 74.4% |
| 1                                                                                                                                                           | Mobile - yes                                                | 301   | <div></div> 25.6% |
| Sysmiss                                                                                                                                                     |                                                             | 3513  |                   |
| Warning: these figures indicate the number of cases found in the data file. They cannot be interpreted as summary statistics of the population of interest. |                                                             |       |                   |
| # r7ocreasm3a1: How important is good education in deciding whether someone could come and live here?                                                       |                                                             |       |                   |
| Information                                                                                                                                                 | [Type= discrete] [Format=numeric] [Range= 0-50] [Missing=*] |       |                   |

| # r7ocreasm3a1: How important is good education in deciding whether someone could come and live here? |            |                                                                                                                                                                                                                                                               |            |
|-------------------------------------------------------------------------------------------------------|------------|---------------------------------------------------------------------------------------------------------------------------------------------------------------------------------------------------------------------------------------------------------------|------------|
| Statistics [NW/ W]                                                                                    |            | [Valid=4689 /-] [Invalid=0 /-]                                                                                                                                                                                                                                |            |
| Pre-question                                                                                          |            | To help us improve our questions in later surveys, we would like to ask you to answer some questions that bears a resemblance to the ones you responded to ealier. Don't try to remember what you responded earlier, think of them as entirely new questions. |            |
| Literal question                                                                                      |            | How important do you think having good educational qualifications should be in deciding whether someone born, brought up and living outside Norway should be able to come and live here?                                                                      |            |
| Interviewer's instructions                                                                            |            | [Asked if u=2, ran20=1 AND R7OCRECSM_mobile2=0. Version for desktop and tablet users. Mobile users are asked R7OCRECSM3A1_mobile.]<br><br>[Slider is used to give answers. Departure position of the marker is set to value 25.]                              |            |
| Notes                                                                                                 |            | For å hjelpe oss med å forbedre spørsmålene våre i senere undersøkelser, vil vi til slutt be deg svare på noen sp                                                                                                                                             |            |
| Value                                                                                                 | Label      | Cases                                                                                                                                                                                                                                                         | Percentage |
| 0                                                                                                     | Not at all | 31                                                                                                                                                                                                                                                            | 0.7%       |
| 1                                                                                                     | 1          | 9                                                                                                                                                                                                                                                             | 0.2%       |
| 2                                                                                                     | 2          | 7                                                                                                                                                                                                                                                             | 0.1%       |
| 3                                                                                                     | 3          | 6                                                                                                                                                                                                                                                             | 0.1%       |
| 4                                                                                                     | 4          | 7                                                                                                                                                                                                                                                             | 0.1%       |
| 5                                                                                                     | 5          | 8                                                                                                                                                                                                                                                             | 0.2%       |
| 6                                                                                                     | 6          | 8                                                                                                                                                                                                                                                             | 0.2%       |
| 7                                                                                                     | 7          | 5                                                                                                                                                                                                                                                             | 0.1%       |
| 8                                                                                                     | 8          | 9                                                                                                                                                                                                                                                             | 0.2%       |
| 9                                                                                                     | 9          | 5                                                                                                                                                                                                                                                             | 0.1%       |
| 10                                                                                                    | 10         | 6                                                                                                                                                                                                                                                             | 0.1%       |
| 11                                                                                                    | 11         | 8                                                                                                                                                                                                                                                             | 0.2%       |
| 12                                                                                                    | 12         | 3                                                                                                                                                                                                                                                             | 0.1%       |
| 13                                                                                                    | 13         | 9                                                                                                                                                                                                                                                             | 0.2%       |
| 14                                                                                                    | 14         | 3                                                                                                                                                                                                                                                             | 0.1%       |
| 15                                                                                                    | 15         | 3                                                                                                                                                                                                                                                             | 0.1%       |
| 16                                                                                                    | 16         | 4                                                                                                                                                                                                                                                             | 0.1%       |
| 17                                                                                                    | 17         | 0                                                                                                                                                                                                                                                             |            |
| 18                                                                                                    | 18         | 3                                                                                                                                                                                                                                                             | 0.1%       |
| 19                                                                                                    | 19         | 3                                                                                                                                                                                                                                                             | 0.1%       |
| 20                                                                                                    | 20         | 2                                                                                                                                                                                                                                                             | 0.0%       |
| 21                                                                                                    | 21         | 2                                                                                                                                                                                                                                                             | 0.0%       |
| 22                                                                                                    | 22         | 2                                                                                                                                                                                                                                                             | 0.0%       |
| 23                                                                                                    | 23         | 1                                                                                                                                                                                                                                                             | 0.0%       |
| 24                                                                                                    | 24         | 5                                                                                                                                                                                                                                                             | 0.1%       |
| 25                                                                                                    | 25         | 44                                                                                                                                                                                                                                                            | 0.9%       |
| 26                                                                                                    | 26         | 2                                                                                                                                                                                                                                                             | 0.0%       |
| 27                                                                                                    | 27         | 3                                                                                                                                                                                                                                                             | 0.1%       |
| 28                                                                                                    | 28         | 5                                                                                                                                                                                                                                                             | 0.1%       |
| 29                                                                                                    | 29         | 5                                                                                                                                                                                                                                                             | 0.1%       |
| 30                                                                                                    | 30         | 7                                                                                                                                                                                                                                                             | 0.1%       |
| 31                                                                                                    | 31         | 4                                                                                                                                                                                                                                                             | 0.1%       |
| 32                                                                                                    | 32         | 5                                                                                                                                                                                                                                                             | 0.1%       |
| 33                                                                                                    | 33         | 6                                                                                                                                                                                                                                                             | 0.1%       |
| 34                                                                                                    | 34         | 5                                                                                                                                                                                                                                                             | 0.1%       |

| # r7ocreasm3a1: How important is good education in deciding whether someone could come and live here?                                                       |                                                                                                                                                                                                                                                                |       |            |
|-------------------------------------------------------------------------------------------------------------------------------------------------------------|----------------------------------------------------------------------------------------------------------------------------------------------------------------------------------------------------------------------------------------------------------------|-------|------------|
| Value                                                                                                                                                       | Label                                                                                                                                                                                                                                                          | Cases | Percentage |
| 35                                                                                                                                                          | 35                                                                                                                                                                                                                                                             | 4     | 0.1%       |
| 36                                                                                                                                                          | 36                                                                                                                                                                                                                                                             | 1     | 0.0%       |
| 37                                                                                                                                                          | 37                                                                                                                                                                                                                                                             | 8     | 0.2%       |
| 38                                                                                                                                                          | 38                                                                                                                                                                                                                                                             | 4     | 0.1%       |
| 39                                                                                                                                                          | 39                                                                                                                                                                                                                                                             | 3     | 0.1%       |
| 40                                                                                                                                                          | 40                                                                                                                                                                                                                                                             | 4     | 0.1%       |
| 41                                                                                                                                                          | 41                                                                                                                                                                                                                                                             | 3     | 0.1%       |
| 42                                                                                                                                                          | 42                                                                                                                                                                                                                                                             | 2     | 0.0%       |
| 43                                                                                                                                                          | 43                                                                                                                                                                                                                                                             | 1     | 0.0%       |
| 44                                                                                                                                                          | 44                                                                                                                                                                                                                                                             | 0     |            |
| 45                                                                                                                                                          | 45                                                                                                                                                                                                                                                             | 1     | 0.0%       |
| 46                                                                                                                                                          | 46                                                                                                                                                                                                                                                             | 2     | 0.0%       |
| 47                                                                                                                                                          | 47                                                                                                                                                                                                                                                             | 0     |            |
| 48                                                                                                                                                          | 48                                                                                                                                                                                                                                                             | 0     |            |
| 49                                                                                                                                                          | 49                                                                                                                                                                                                                                                             | 4     | 0.1%       |
| 50                                                                                                                                                          | Completely                                                                                                                                                                                                                                                     | 5     | 0.1%       |
| 97                                                                                                                                                          | No answer                                                                                                                                                                                                                                                      | 0     |            |
| 98                                                                                                                                                          | Not asked                                                                                                                                                                                                                                                      | 4412  | 94.1%      |
| Warning: these figures indicate the number of cases found in the data file. They cannot be interpreted as summary statistics of the population of interest. |                                                                                                                                                                                                                                                                |       |            |
| # r7ocreasm3a1_mobile: How important is good education in deciding whether someone could come and live here?                                                |                                                                                                                                                                                                                                                                |       |            |
| Information                                                                                                                                                 | [Type= discrete] [Format=numeric] [Range= 0-50] [Missing=*]                                                                                                                                                                                                    |       |            |
| Statistics [NW/ W]                                                                                                                                          | [Valid=4689 /-] [Invalid=0 /-]                                                                                                                                                                                                                                 |       |            |
| Pre-question                                                                                                                                                | To help us improve our questions in later surveys, we would like to ask you to answer some questions that bears a resemblance to the ones you responded to earlier. Don't try to remember what you responded earlier, think of them as entirely new questions. |       |            |
| Literal question                                                                                                                                            | How important do you think having good educational qualifications should be in deciding whether someone born, brought up and living outside Norway should be able to come and live here?                                                                       |       |            |
| Interviewer's instructions                                                                                                                                  | [Asked if u=2, ran20=1 AND R7OCRECSM_mobile2=1. Version for mobile users due to layout. Desktop/tablet users are asked R7OCRECSM3A1.]<br><br>[Slider is used to give answers. Departure position of the marker is set to value 25.]                            |       |            |
| Notes                                                                                                                                                       | For å hjelpe oss med å forbedre spørsmålene våre i senere undersøkelser, vil vi til slutt be deg svare på noen sp                                                                                                                                              |       |            |
| Value                                                                                                                                                       | Label                                                                                                                                                                                                                                                          | Cases | Percentage |
| 0                                                                                                                                                           | Not at all                                                                                                                                                                                                                                                     | 5     | 0.1%       |
| 1                                                                                                                                                           | 1                                                                                                                                                                                                                                                              | 1     | 0.0%       |
| 2                                                                                                                                                           | 2                                                                                                                                                                                                                                                              | 1     | 0.0%       |
| 3                                                                                                                                                           | 3                                                                                                                                                                                                                                                              | 3     | 0.1%       |
| 4                                                                                                                                                           | 4                                                                                                                                                                                                                                                              | 1     | 0.0%       |
| 5                                                                                                                                                           | 5                                                                                                                                                                                                                                                              | 2     | 0.0%       |
| 6                                                                                                                                                           | 6                                                                                                                                                                                                                                                              | 3     | 0.1%       |
| 7                                                                                                                                                           | 7                                                                                                                                                                                                                                                              | 4     | 0.1%       |
| 8                                                                                                                                                           | 8                                                                                                                                                                                                                                                              | 1     | 0.0%       |
| 9                                                                                                                                                           | 9                                                                                                                                                                                                                                                              | 0     |            |
| 10                                                                                                                                                          | 10                                                                                                                                                                                                                                                             | 0     |            |
| 11                                                                                                                                                          | 11                                                                                                                                                                                                                                                             | 2     | 0.0%       |
| 12                                                                                                                                                          | 12                                                                                                                                                                                                                                                             | 4     | 0.1%       |

# r7ocreasm3a1\_mobile: How important is good education in deciding whether someone could come and live here?

| Value | Label      | Cases | Percentage |
|-------|------------|-------|------------|
| 13    | 13         | 2     | 0.0%       |
| 14    | 14         | 2     | 0.0%       |
| 15    | 15         | 2     | 0.0%       |
| 16    | 16         | 0     |            |
| 17    | 17         | 0     |            |
| 18    | 18         | 1     | 0.0%       |
| 19    | 19         | 1     | 0.0%       |
| 20    | 20         | 0     |            |
| 21    | 21         | 0     |            |
| 22    | 22         | 0     |            |
| 23    | 23         | 1     | 0.0%       |
| 24    | 24         | 0     |            |
| 25    | 25         | 15    | 0.3%       |
| 26    | 26         | 1     | 0.0%       |
| 27    | 27         | 1     | 0.0%       |
| 28    | 28         | 2     | 0.0%       |
| 29    | 29         | 2     | 0.0%       |
| 30    | 30         | 4     | 0.1%       |
| 31    | 31         | 3     | 0.1%       |
| 32    | 32         | 2     | 0.0%       |
| 33    | 33         | 0     |            |
| 34    | 34         | 1     | 0.0%       |
| 35    | 35         | 0     |            |
| 36    | 36         | 1     | 0.0%       |
| 37    | 37         | 2     | 0.0%       |
| 38    | 38         | 1     | 0.0%       |
| 39    | 39         | 0     |            |
| 40    | 40         | 2     | 0.0%       |
| 41    | 41         | 1     | 0.0%       |
| 42    | 42         | 1     | 0.0%       |
| 43    | 43         | 1     | 0.0%       |
| 44    | 44         | 0     |            |
| 45    | 45         | 2     | 0.0%       |
| 46    | 46         | 1     | 0.0%       |
| 47    | 47         | 0     |            |
| 48    | 48         | 1     | 0.0%       |
| 49    | 49         | 1     | 0.0%       |
| 50    | Completely | 5     | 0.1%       |
| 97    | No answer  | 0     |            |
| 98    | Not asked  | 4603  | 98.2%      |

Warning: these figures indicate the number of cases found in the data file. They cannot be interpreted as summary statistics of the population of interest.

# r7ocreasm3a2: How important is a Christian background in deciding whether someone could come and live here?

|                    |                                                             |
|--------------------|-------------------------------------------------------------|
| Information        | [Type= discrete] [Format=numeric] [Range= 0-50] [Missing=*] |
| Statistics [NW/ W] | [Valid=4689 /-] [Invalid=0 /-]                              |

| # r7ocreasm3a2: How important is a Christian background in deciding whether someone could come and live here? |            |                                                                                                                                                                                                                                  |            |
|---------------------------------------------------------------------------------------------------------------|------------|----------------------------------------------------------------------------------------------------------------------------------------------------------------------------------------------------------------------------------|------------|
| <b>Literal question</b>                                                                                       |            | How important do you think coming from a Christian background should be in deciding whether someone should be able to come and live here?                                                                                        |            |
| <b>Interviewer's instructions</b>                                                                             |            | [Asked if u=2, ran20=1 AND R7OCRECSM_mobile2=0. Version for desktop and tablet users. Mobile users are asked R7OCRECSM3A2_mobile.]<br><br>[Slider is used to give answers. Departure position of the marker is set to value 25.] |            |
| <b>Notes</b>                                                                                                  |            | Hvor viktig synes du en kristen bakgrunn bør være for å avgjøre om noen skal få bosette seg her? ^f('R7OCRECSM_skal                                                                                                              |            |
| Value                                                                                                         | Label      | Cases                                                                                                                                                                                                                            | Percentage |
| 0                                                                                                             | Not at all | 95                                                                                                                                                                                                                               | 2.0%       |
| 1                                                                                                             | 1          | 8                                                                                                                                                                                                                                | 0.2%       |
| 2                                                                                                             | 2          | 12                                                                                                                                                                                                                               | 0.3%       |
| 3                                                                                                             | 3          | 10                                                                                                                                                                                                                               | 0.2%       |
| 4                                                                                                             | 4          | 7                                                                                                                                                                                                                                | 0.1%       |
| 5                                                                                                             | 5          | 7                                                                                                                                                                                                                                | 0.1%       |
| 6                                                                                                             | 6          | 5                                                                                                                                                                                                                                | 0.1%       |
| 7                                                                                                             | 7          | 7                                                                                                                                                                                                                                | 0.1%       |
| 8                                                                                                             | 8          | 2                                                                                                                                                                                                                                | 0.0%       |
| 9                                                                                                             | 9          | 3                                                                                                                                                                                                                                | 0.1%       |
| 10                                                                                                            | 10         | 11                                                                                                                                                                                                                               | 0.2%       |
| 11                                                                                                            | 11         | 5                                                                                                                                                                                                                                | 0.1%       |
| 12                                                                                                            | 12         | 8                                                                                                                                                                                                                                | 0.2%       |
| 13                                                                                                            | 13         | 4                                                                                                                                                                                                                                | 0.1%       |
| 14                                                                                                            | 14         | 2                                                                                                                                                                                                                                | 0.0%       |
| 15                                                                                                            | 15         | 4                                                                                                                                                                                                                                | 0.1%       |
| 16                                                                                                            | 16         | 4                                                                                                                                                                                                                                | 0.1%       |
| 17                                                                                                            | 17         | 3                                                                                                                                                                                                                                | 0.1%       |
| 18                                                                                                            | 18         | 3                                                                                                                                                                                                                                | 0.1%       |
| 19                                                                                                            | 19         | 3                                                                                                                                                                                                                                | 0.1%       |
| 20                                                                                                            | 20         | 3                                                                                                                                                                                                                                | 0.1%       |
| 21                                                                                                            | 21         | 6                                                                                                                                                                                                                                | 0.1%       |
| 22                                                                                                            | 22         | 3                                                                                                                                                                                                                                | 0.1%       |
| 23                                                                                                            | 23         | 0                                                                                                                                                                                                                                |            |
| 24                                                                                                            | 24         | 1                                                                                                                                                                                                                                | 0.0%       |
| 25                                                                                                            | 25         | 20                                                                                                                                                                                                                               | 0.4%       |
| 26                                                                                                            | 26         | 1                                                                                                                                                                                                                                | 0.0%       |
| 27                                                                                                            | 27         | 0                                                                                                                                                                                                                                |            |
| 28                                                                                                            | 28         | 3                                                                                                                                                                                                                                | 0.1%       |
| 29                                                                                                            | 29         | 0                                                                                                                                                                                                                                |            |
| 30                                                                                                            | 30         | 5                                                                                                                                                                                                                                | 0.1%       |
| 31                                                                                                            | 31         | 3                                                                                                                                                                                                                                | 0.1%       |
| 32                                                                                                            | 32         | 2                                                                                                                                                                                                                                | 0.0%       |
| 33                                                                                                            | 33         | 0                                                                                                                                                                                                                                |            |
| 34                                                                                                            | 34         | 2                                                                                                                                                                                                                                | 0.0%       |
| 35                                                                                                            | 35         | 2                                                                                                                                                                                                                                | 0.0%       |
| 36                                                                                                            | 36         | 2                                                                                                                                                                                                                                | 0.0%       |
| 37                                                                                                            | 37         | 3                                                                                                                                                                                                                                | 0.1%       |
| 38                                                                                                            | 38         | 4                                                                                                                                                                                                                                | 0.1%       |

| # r7ocreasm3a2: How important is a Christian background in deciding whether someone could come and live here?                                               |                                                                                                                                                                                                                                     |       |            |
|-------------------------------------------------------------------------------------------------------------------------------------------------------------|-------------------------------------------------------------------------------------------------------------------------------------------------------------------------------------------------------------------------------------|-------|------------|
| Value                                                                                                                                                       | Label                                                                                                                                                                                                                               | Cases | Percentage |
| 39                                                                                                                                                          | 39                                                                                                                                                                                                                                  | 4     | 0.1%       |
| 40                                                                                                                                                          | 40                                                                                                                                                                                                                                  | 0     |            |
| 41                                                                                                                                                          | 41                                                                                                                                                                                                                                  | 1     | 0.0%       |
| 42                                                                                                                                                          | 42                                                                                                                                                                                                                                  | 2     | 0.0%       |
| 43                                                                                                                                                          | 43                                                                                                                                                                                                                                  | 0     |            |
| 44                                                                                                                                                          | 44                                                                                                                                                                                                                                  | 0     |            |
| 45                                                                                                                                                          | 45                                                                                                                                                                                                                                  | 0     |            |
| 46                                                                                                                                                          | 46                                                                                                                                                                                                                                  | 0     |            |
| 47                                                                                                                                                          | 47                                                                                                                                                                                                                                  | 1     | 0.0%       |
| 48                                                                                                                                                          | 48                                                                                                                                                                                                                                  | 3     | 0.1%       |
| 49                                                                                                                                                          | 49                                                                                                                                                                                                                                  | 0     |            |
| 50                                                                                                                                                          | Completely                                                                                                                                                                                                                          | 3     | 0.1%       |
| 97                                                                                                                                                          | No answer                                                                                                                                                                                                                           | 0     |            |
| 98                                                                                                                                                          | Not asked                                                                                                                                                                                                                           | 4412  | 94.1%      |
| Warning: these figures indicate the number of cases found in the data file. They cannot be interpreted as summary statistics of the population of interest. |                                                                                                                                                                                                                                     |       |            |
| # r7ocreasm3a2_mobile: How important is a Christian background in deciding whether someone could come and live here?                                        |                                                                                                                                                                                                                                     |       |            |
| Information                                                                                                                                                 | [Type= discrete] [Format=numeric] [Range= 0-50] [Missing=*]                                                                                                                                                                         |       |            |
| Statistics [NW/ W]                                                                                                                                          | [Valid=4689 /-] [Invalid=0 /-]                                                                                                                                                                                                      |       |            |
| Literal question                                                                                                                                            | How important do you think coming from a Christian background should be in deciding whether someone should be able to come and live here?                                                                                           |       |            |
| Interviewer's instructions                                                                                                                                  | [Asked if u=2, ran20=1 AND R7OCRECSM_mobile2=1. Version for mobile users due to layout. Desktop/tablet users are asked R7OCRECSM3A2.]<br><br>[Slider is used to give answers. Departure position of the marker is set to value 25.] |       |            |
| Notes                                                                                                                                                       | Hvor viktig synes du en kristen bakgrunn bør være for å avgjøre om noen skal få bosette seg her?                                                                                                                                    |       |            |
| Value                                                                                                                                                       | Label                                                                                                                                                                                                                               | Cases | Percentage |
| 0                                                                                                                                                           | Not at all                                                                                                                                                                                                                          | 36    | 0.8%       |
| 1                                                                                                                                                           | 1                                                                                                                                                                                                                                   | 0     |            |
| 2                                                                                                                                                           | 2                                                                                                                                                                                                                                   | 0     |            |
| 3                                                                                                                                                           | 3                                                                                                                                                                                                                                   | 0     |            |
| 4                                                                                                                                                           | 4                                                                                                                                                                                                                                   | 0     |            |
| 5                                                                                                                                                           | 5                                                                                                                                                                                                                                   | 2     | 0.0%       |
| 6                                                                                                                                                           | 6                                                                                                                                                                                                                                   | 3     | 0.1%       |
| 7                                                                                                                                                           | 7                                                                                                                                                                                                                                   | 1     | 0.0%       |
| 8                                                                                                                                                           | 8                                                                                                                                                                                                                                   | 0     |            |
| 9                                                                                                                                                           | 9                                                                                                                                                                                                                                   | 2     | 0.0%       |
| 10                                                                                                                                                          | 10                                                                                                                                                                                                                                  | 5     | 0.1%       |
| 11                                                                                                                                                          | 11                                                                                                                                                                                                                                  | 1     | 0.0%       |
| 12                                                                                                                                                          | 12                                                                                                                                                                                                                                  | 2     | 0.0%       |
| 13                                                                                                                                                          | 13                                                                                                                                                                                                                                  | 1     | 0.0%       |
| 14                                                                                                                                                          | 14                                                                                                                                                                                                                                  | 1     | 0.0%       |
| 15                                                                                                                                                          | 15                                                                                                                                                                                                                                  | 1     | 0.0%       |
| 16                                                                                                                                                          | 16                                                                                                                                                                                                                                  | 0     |            |
| 17                                                                                                                                                          | 17                                                                                                                                                                                                                                  | 1     | 0.0%       |

**# r7ocreasm3a2\_mobile: How important is a Christian background in deciding whether someone could come and live here?**

| Value | Label      | Cases | Percentage |
|-------|------------|-------|------------|
| 18    | 18         | 0     |            |
| 19    | 19         | 0     |            |
| 20    | 20         | 0     |            |
| 21    | 21         | 0     |            |
| 22    | 22         | 0     |            |
| 23    | 23         | 0     |            |
| 24    | 24         | 0     |            |
| 25    | 25         | 16    | 0.3%       |
| 26    | 26         | 0     |            |
| 27    | 27         | 1     | 0.0%       |
| 28    | 28         | 0     |            |
| 29    | 29         | 1     | 0.0%       |
| 30    | 30         | 1     | 0.0%       |
| 31    | 31         | 2     | 0.0%       |
| 32    | 32         | 0     |            |
| 33    | 33         | 0     |            |
| 34    | 34         | 0     |            |
| 35    | 35         | 1     | 0.0%       |
| 36    | 36         | 1     | 0.0%       |
| 37    | 37         | 0     |            |
| 38    | 38         | 0     |            |
| 39    | 39         | 0     |            |
| 40    | 40         | 1     | 0.0%       |
| 41    | 41         | 2     | 0.0%       |
| 42    | 42         | 0     |            |
| 43    | 43         | 1     | 0.0%       |
| 44    | 44         | 0     |            |
| 45    | 45         | 0     |            |
| 46    | 46         | 0     |            |
| 47    | 47         | 1     | 0.0%       |
| 48    | 48         | 1     | 0.0%       |
| 49    | 49         | 0     |            |
| 50    | Completely | 2     | 0.0%       |
| 97    | No answer  | 0     |            |
| 98    | Not asked  | 4602  | 98.1%      |

*Warning: these figures indicate the number of cases found in the data file. They cannot be interpreted as summary statistics of the population of interest.*

**# r7ocreasm3a3: How important is having skills that Norway needs in deciding whether someone could come and live here?**

|                                   |                                                                                                                                             |
|-----------------------------------|---------------------------------------------------------------------------------------------------------------------------------------------|
| <b>Information</b>                | [Type= discrete] [Format=numeric] [Range= 0-50] [Missing=*]                                                                                 |
| <b>Statistics [NW/ W]</b>         | [Valid=4689 /-] [Invalid=0 /-]                                                                                                              |
| <b>Literal question</b>           | How important do you think having work skills that Norway needs should be in deciding whether someone should be able to come and live here? |
| <b>Interviewer's instructions</b> | [Asked if u=2, ran20=1 AND R7OCRECSM_mobile2=0. Version for desktop and tablet users. Mobile users are asked R7OCRECSM3A3_mobile. ]         |



# r7ocrecsm3a3: How important is having skills that Norway needs in deciding whether someone could come and live here?

[Slider is used to give answers. Departure position of the marker is set to value 25.]

**Notes** Hvor viktig synes du kunnskaper og ferdigheter som Norge trenger bør være for å avgjøre om noen skal få bosette seg

| Value | Label      | Cases | Percentage |
|-------|------------|-------|------------|
| 0     | Not at all | 29    | 0.6%       |
| 1     | 1          | 5     | 0.1%       |
| 2     | 2          | 9     | 0.2%       |
| 3     | 3          | 10    | 0.2%       |
| 4     | 4          | 3     | 0.1%       |
| 5     | 5          | 6     | 0.1%       |
| 6     | 6          | 9     | 0.2%       |
| 7     | 7          | 7     | 0.1%       |
| 8     | 8          | 3     | 0.1%       |
| 9     | 9          | 6     | 0.1%       |
| 10    | 10         | 7     | 0.1%       |
| 11    | 11         | 1     | 0.0%       |
| 12    | 12         | 4     | 0.1%       |
| 13    | 13         | 5     | 0.1%       |
| 14    | 14         | 7     | 0.1%       |
| 15    | 15         | 2     | 0.0%       |
| 16    | 16         | 3     | 0.1%       |
| 17    | 17         | 4     | 0.1%       |
| 18    | 18         | 4     | 0.1%       |
| 19    | 19         | 4     | 0.1%       |
| 20    | 20         | 4     | 0.1%       |
| 21    | 21         | 4     | 0.1%       |
| 22    | 22         | 2     | 0.0%       |
| 23    | 23         | 1     | 0.0%       |
| 24    | 24         | 3     | 0.1%       |
| 25    | 25         | 37    | 0.8%       |
| 26    | 26         | 2     | 0.0%       |
| 27    | 27         | 3     | 0.1%       |
| 28    | 28         | 1     | 0.0%       |
| 29    | 29         | 7     | 0.1%       |
| 30    | 30         | 8     | 0.2%       |
| 31    | 31         | 3     | 0.1%       |
| 32    | 32         | 13    | 0.3%       |
| 33    | 33         | 5     | 0.1%       |
| 34    | 34         | 9     | 0.2%       |
| 35    | 35         | 4     | 0.1%       |
| 36    | 36         | 5     | 0.1%       |
| 37    | 37         | 4     | 0.1%       |
| 38    | 38         | 2     | 0.0%       |
| 39    | 39         | 6     | 0.1%       |
| 40    | 40         | 4     | 0.1%       |
| 41    | 41         | 3     | 0.1%       |

**# r7ocreasm3a3: How important is having skills that Norway needs in deciding whether someone could come and live here?**

| Value | Label      | Cases | Percentage |
|-------|------------|-------|------------|
| 42    | 42         | 0     |            |
| 43    | 43         | 4     | 0.1%       |
| 44    | 44         | 3     | 0.1%       |
| 45    | 45         | 2     | 0.0%       |
| 46    | 46         | 1     | 0.0%       |
| 47    | 47         | 1     | 0.0%       |
| 48    | 48         | 2     | 0.0%       |
| 49    | 49         | 0     |            |
| 50    | Completely | 6     | 0.1%       |
| 97    | No answer  | 0     |            |
| 98    | Not asked  | 4412  | 94.1%      |

*Warning: these figures indicate the number of cases found in the data file. They cannot be interpreted as summary statistics of the population of interest.*

**# r7ocreasm3a3\_mobile: How important is having skills that Norway needs in deciding whether someone could come and live here?**

|                                   |                                                                                                                                                                                                                                      |
|-----------------------------------|--------------------------------------------------------------------------------------------------------------------------------------------------------------------------------------------------------------------------------------|
| <b>Information</b>                | [Type= discrete] [Format=numeric] [Range= 0-50] [Missing=*]                                                                                                                                                                          |
| <b>Statistics [NW/ W]</b>         | [Valid=4689 /-] [Invalid=0 /-]                                                                                                                                                                                                       |
| <b>Literal question</b>           | How important do you think having work skills that Norway needs should be in deciding whether someone should be able to come and live here?                                                                                          |
| <b>Interviewer's instructions</b> | [Asked if u=2, ran20=1 AND R7OCRECSM_mobile2=1. Version for mobile users due to layout. Desktop/tablet users are asked R7OCRECSM3A3. ]<br><br>[Slider is used to give answers. Departure position of the marker is set to value 25.] |
| <b>Notes</b>                      | Hvor viktig synes du kunnskaper og ferdigheter som Norge trenger bør være for å avgjøre om noen skal få bosette seg                                                                                                                  |

| Value | Label      | Cases | Percentage |
|-------|------------|-------|------------|
| 0     | Not at all | 7     | 0.1%       |
| 1     | 1          | 0     |            |
| 2     | 2          | 1     | 0.0%       |
| 3     | 3          | 2     | 0.0%       |
| 4     | 4          | 0     |            |
| 5     | 5          | 1     | 0.0%       |
| 6     | 6          | 1     | 0.0%       |
| 7     | 7          | 2     | 0.0%       |
| 8     | 8          | 0     |            |
| 9     | 9          | 2     | 0.0%       |
| 10    | 10         | 3     | 0.1%       |
| 11    | 11         | 2     | 0.0%       |
| 12    | 12         | 1     | 0.0%       |
| 13    | 13         | 1     | 0.0%       |
| 14    | 14         | 2     | 0.0%       |
| 15    | 15         | 0     |            |
| 16    | 16         | 1     | 0.0%       |
| 17    | 17         | 1     | 0.0%       |
| 18    | 18         | 2     | 0.0%       |
| 19    | 19         | 1     | 0.0%       |

**# r7ocreasm3a3\_mobile: How important is having skills that Norway needs in deciding whether someone could come and live here?**

| Value | Label      | Cases | Percentage |
|-------|------------|-------|------------|
| 20    | 20         | 0     |            |
| 21    | 21         | 1     | 0.0%       |
| 22    | 22         | 0     |            |
| 23    | 23         | 0     |            |
| 24    | 24         | 0     |            |
| 25    | 25         | 18    | 0.4%       |
| 26    | 26         | 1     | 0.0%       |
| 27    | 27         | 0     |            |
| 28    | 28         | 0     |            |
| 29    | 29         | 0     |            |
| 30    | 30         | 1     | 0.0%       |
| 31    | 31         | 4     | 0.1%       |
| 32    | 32         | 0     |            |
| 33    | 33         | 1     | 0.0%       |
| 34    | 34         | 3     | 0.1%       |
| 35    | 35         | 2     | 0.0%       |
| 36    | 36         | 2     | 0.0%       |
| 37    | 37         | 3     | 0.1%       |
| 38    | 38         | 3     | 0.1%       |
| 39    | 39         | 0     |            |
| 40    | 40         | 3     | 0.1%       |
| 41    | 41         | 1     | 0.0%       |
| 42    | 42         | 1     | 0.0%       |
| 43    | 43         | 2     | 0.0%       |
| 44    | 44         | 0     |            |
| 45    | 45         | 0     |            |
| 46    | 46         | 0     |            |
| 47    | 47         | 1     | 0.0%       |
| 48    | 48         | 0     |            |
| 49    | 49         | 0     |            |
| 50    | Completely | 10    | 0.2%       |
| 97    | No answer  | 0     |            |
| 98    | Not asked  | 4602  | 98.1%      |

*Warning: these figures indicate the number of cases found in the data file. They cannot be interpreted as summary statistics of the population of interest.*

**# r7ocreasm3b1: How important is good education in deciding whether someone could come and live here?**

|                                   |                                                                                                                                                                                                                                                               |
|-----------------------------------|---------------------------------------------------------------------------------------------------------------------------------------------------------------------------------------------------------------------------------------------------------------|
| <b>Information</b>                | [Type= discrete] [Format=numeric] [Range= 0-50] [Missing=*]                                                                                                                                                                                                   |
| <b>Statistics [NW/ W]</b>         | [Valid=4689 /-] [Invalid=0 /-]                                                                                                                                                                                                                                |
| <b>Pre-question</b>               | To help us improve our questions in later surveys, we would like to ask you to answer some questions that bears a resemblance to the ones you responded to ealier. Don't try to remember what you responded earlier, think of them as entirely new questions. |
| <b>Literal question</b>           | How important do you think having good educational qualifications should be in deciding whether someone born, brought up and living outside Norway should be able to come and live here?                                                                      |
| <b>Interviewer's instructions</b> | [Asked if u=2, ran20=2 AND R7OCRECSM_mobile2=0. Version for desktop and tablet users. Mobile users are asked R7OCRECSM3B1_mobile.]                                                                                                                            |

| # r7ocreasm3b1: How important is good education in deciding whether someone could come and live here? |            |                                                                                                                   |            |
|-------------------------------------------------------------------------------------------------------|------------|-------------------------------------------------------------------------------------------------------------------|------------|
|                                                                                                       |            | [Slider is used to give answers. Departure position of the marker is set to value 1.]                             |            |
| Notes                                                                                                 |            | For å hjelpe oss med å forbedre spørsmålene våre i senere undersøkelser, vil vi til slutt be deg svare på noen sp |            |
| Value                                                                                                 | Label      | Cases                                                                                                             | Percentage |
| 0                                                                                                     | Not at all | 10                                                                                                                | 0.2%       |
| 1                                                                                                     | 1          | 45                                                                                                                | 1.0%       |
| 2                                                                                                     | 2          | 2                                                                                                                 | 0.0%       |
| 3                                                                                                     | 3          | 2                                                                                                                 | 0.0%       |
| 4                                                                                                     | 4          | 6                                                                                                                 | 0.1%       |
| 5                                                                                                     | 5          | 5                                                                                                                 | 0.1%       |
| 6                                                                                                     | 6          | 5                                                                                                                 | 0.1%       |
| 7                                                                                                     | 7          | 3                                                                                                                 | 0.1%       |
| 8                                                                                                     | 8          | 4                                                                                                                 | 0.1%       |
| 9                                                                                                     | 9          | 5                                                                                                                 | 0.1%       |
| 10                                                                                                    | 10         | 3                                                                                                                 | 0.1%       |
| 11                                                                                                    | 11         | 7                                                                                                                 | 0.1%       |
| 12                                                                                                    | 12         | 8                                                                                                                 | 0.2%       |
| 13                                                                                                    | 13         | 1                                                                                                                 | 0.0%       |
| 14                                                                                                    | 14         | 5                                                                                                                 | 0.1%       |
| 15                                                                                                    | 15         | 6                                                                                                                 | 0.1%       |
| 16                                                                                                    | 16         | 6                                                                                                                 | 0.1%       |
| 17                                                                                                    | 17         | 6                                                                                                                 | 0.1%       |
| 18                                                                                                    | 18         | 6                                                                                                                 | 0.1%       |
| 19                                                                                                    | 19         | 6                                                                                                                 | 0.1%       |
| 20                                                                                                    | 20         | 3                                                                                                                 | 0.1%       |
| 21                                                                                                    | 21         | 4                                                                                                                 | 0.1%       |
| 22                                                                                                    | 22         | 5                                                                                                                 | 0.1%       |
| 23                                                                                                    | 23         | 2                                                                                                                 | 0.0%       |
| 24                                                                                                    | 24         | 16                                                                                                                | 0.3%       |
| 25                                                                                                    | 25         | 17                                                                                                                | 0.4%       |
| 26                                                                                                    | 26         | 5                                                                                                                 | 0.1%       |
| 27                                                                                                    | 27         | 7                                                                                                                 | 0.1%       |
| 28                                                                                                    | 28         | 6                                                                                                                 | 0.1%       |
| 29                                                                                                    | 29         | 5                                                                                                                 | 0.1%       |
| 30                                                                                                    | 30         | 7                                                                                                                 | 0.1%       |
| 31                                                                                                    | 31         | 6                                                                                                                 | 0.1%       |
| 32                                                                                                    | 32         | 7                                                                                                                 | 0.1%       |
| 33                                                                                                    | 33         | 10                                                                                                                | 0.2%       |
| 34                                                                                                    | 34         | 6                                                                                                                 | 0.1%       |
| 35                                                                                                    | 35         | 5                                                                                                                 | 0.1%       |
| 36                                                                                                    | 36         | 8                                                                                                                 | 0.2%       |
| 37                                                                                                    | 37         | 5                                                                                                                 | 0.1%       |
| 38                                                                                                    | 38         | 5                                                                                                                 | 0.1%       |
| 39                                                                                                    | 39         | 2                                                                                                                 | 0.0%       |
| 40                                                                                                    | 40         | 3                                                                                                                 | 0.1%       |
| 41                                                                                                    | 41         | 1                                                                                                                 | 0.0%       |
| 42                                                                                                    | 42         | 2                                                                                                                 | 0.0%       |

| # r7ocreasm3b1: How important is good education in deciding whether someone could come and live here?                                                       |                                                                                                                                                                                                                                                               |       |            |
|-------------------------------------------------------------------------------------------------------------------------------------------------------------|---------------------------------------------------------------------------------------------------------------------------------------------------------------------------------------------------------------------------------------------------------------|-------|------------|
| Value                                                                                                                                                       | Label                                                                                                                                                                                                                                                         | Cases | Percentage |
| 43                                                                                                                                                          | 43                                                                                                                                                                                                                                                            | 3     | 0.1%       |
| 44                                                                                                                                                          | 44                                                                                                                                                                                                                                                            | 2     | 0.0%       |
| 45                                                                                                                                                          | 45                                                                                                                                                                                                                                                            | 2     | 0.0%       |
| 46                                                                                                                                                          | 46                                                                                                                                                                                                                                                            | 1     | 0.0%       |
| 47                                                                                                                                                          | 47                                                                                                                                                                                                                                                            | 3     | 0.1%       |
| 48                                                                                                                                                          | 48                                                                                                                                                                                                                                                            | 0     |            |
| 49                                                                                                                                                          | 49                                                                                                                                                                                                                                                            | 1     | 0.0%       |
| 50                                                                                                                                                          | Completely                                                                                                                                                                                                                                                    | 6     | 0.1%       |
| 97                                                                                                                                                          | No answer                                                                                                                                                                                                                                                     | 0     |            |
| 98                                                                                                                                                          | Not asked                                                                                                                                                                                                                                                     | 4393  | 93.7%      |
| Warning: these figures indicate the number of cases found in the data file. They cannot be interpreted as summary statistics of the population of interest. |                                                                                                                                                                                                                                                               |       |            |
| # r7ocreasm3b1_mobile: How important is good education in deciding whether someone could come and live here?                                                |                                                                                                                                                                                                                                                               |       |            |
| Information                                                                                                                                                 | [Type= discrete] [Format=numeric] [Range= 0-50] [Missing=*]                                                                                                                                                                                                   |       |            |
| Statistics [NW/ W]                                                                                                                                          | [Valid=4689 /-] [Invalid=0 /-]                                                                                                                                                                                                                                |       |            |
| Pre-question                                                                                                                                                | To help us improve our questions in later surveys, we would like to ask you to answer some questions that bears a resemblance to the ones you responded to ealier. Don't try to remember what you responded earlier, think of them as entirely new questions. |       |            |
| Literal question                                                                                                                                            | How important do you think having good educational qualifications should be in deciding whether someone born, brought up and living outside Norway should be able to come and live here?                                                                      |       |            |
| Interviewer's instructions                                                                                                                                  | [Asked if u=2, ran20=2 AND R7OCRECSM_mobile2=1. Version for mobile users due to layout. Desktop/tablet users are asked R7OCRECSM3B1.]<br><br>[Slider is used to give answers. Departure positition of the marker is set to value 1.]                          |       |            |
| Notes                                                                                                                                                       | For å hjelpe oss med å forbedre spørsmålene våre i senere undersøkelser, vil vi til slutt be deg svare på noen sp                                                                                                                                             |       |            |
| Value                                                                                                                                                       | Label                                                                                                                                                                                                                                                         | Cases | Percentage |
| 0                                                                                                                                                           | Not at all                                                                                                                                                                                                                                                    | 4     | 0.1%       |
| 1                                                                                                                                                           | 1                                                                                                                                                                                                                                                             | 26    | 0.6%       |
| 2                                                                                                                                                           | 2                                                                                                                                                                                                                                                             | 0     |            |
| 3                                                                                                                                                           | 3                                                                                                                                                                                                                                                             | 1     | 0.0%       |
| 4                                                                                                                                                           | 4                                                                                                                                                                                                                                                             | 0     |            |
| 5                                                                                                                                                           | 5                                                                                                                                                                                                                                                             | 3     | 0.1%       |
| 6                                                                                                                                                           | 6                                                                                                                                                                                                                                                             | 3     | 0.1%       |
| 7                                                                                                                                                           | 7                                                                                                                                                                                                                                                             | 3     | 0.1%       |
| 8                                                                                                                                                           | 8                                                                                                                                                                                                                                                             | 0     |            |
| 9                                                                                                                                                           | 9                                                                                                                                                                                                                                                             | 1     | 0.0%       |
| 10                                                                                                                                                          | 10                                                                                                                                                                                                                                                            | 0     |            |
| 11                                                                                                                                                          | 11                                                                                                                                                                                                                                                            | 2     | 0.0%       |
| 12                                                                                                                                                          | 12                                                                                                                                                                                                                                                            | 0     |            |
| 13                                                                                                                                                          | 13                                                                                                                                                                                                                                                            | 1     | 0.0%       |
| 14                                                                                                                                                          | 14                                                                                                                                                                                                                                                            | 5     | 0.1%       |
| 15                                                                                                                                                          | 15                                                                                                                                                                                                                                                            | 1     | 0.0%       |
| 16                                                                                                                                                          | 16                                                                                                                                                                                                                                                            | 3     | 0.1%       |
| 17                                                                                                                                                          | 17                                                                                                                                                                                                                                                            | 1     | 0.0%       |
| 18                                                                                                                                                          | 18                                                                                                                                                                                                                                                            | 1     | 0.0%       |
| 19                                                                                                                                                          | 19                                                                                                                                                                                                                                                            | 4     | 0.1%       |
| 20                                                                                                                                                          | 20                                                                                                                                                                                                                                                            | 2     | 0.0%       |

# # r7ocreasm3b1\_mobile: How important is good education in deciding whether someone could come and live here?

| Value | Label      | Cases | Percentage |
|-------|------------|-------|------------|
| 21    | 21         | 3     | 0.1%       |
| 22    | 22         | 1     | 0.0%       |
| 23    | 23         | 1     | 0.0%       |
| 24    | 24         | 1     | 0.0%       |
| 25    | 25         | 1     | 0.0%       |
| 26    | 26         | 2     | 0.0%       |
| 27    | 27         | 2     | 0.0%       |
| 28    | 28         | 1     | 0.0%       |
| 29    | 29         | 1     | 0.0%       |
| 30    | 30         | 3     | 0.1%       |
| 31    | 31         | 0     |            |
| 32    | 32         | 3     | 0.1%       |
| 33    | 33         | 2     | 0.0%       |
| 34    | 34         | 0     |            |
| 35    | 35         | 0     |            |
| 36    | 36         | 2     | 0.0%       |
| 37    | 37         | 2     | 0.0%       |
| 38    | 38         | 2     | 0.0%       |
| 39    | 39         | 2     | 0.0%       |
| 40    | 40         | 4     | 0.1%       |
| 41    | 41         | 1     | 0.0%       |
| 42    | 42         | 1     | 0.0%       |
| 43    | 43         | 2     | 0.0%       |
| 44    | 44         | 1     | 0.0%       |
| 45    | 45         | 1     | 0.0%       |
| 46    | 46         | 0     |            |
| 47    | 47         | 1     | 0.0%       |
| 48    | 48         | 2     | 0.0%       |
| 49    | 49         | 0     |            |
| 50    | Completely | 5     | 0.1%       |
| 97    | No answer  | 0     |            |
| 98    | Not asked  | 4581  | 97.7%      |

Warning: these figures indicate the number of cases found in the data file. They cannot be interpreted as summary statistics of the population of interest.

# # r7ocreasm3b2: How important is a Christian background in deciding whether someone could come and live here?

| Information                | [Type= discrete] [Format=numeric] [Range= 0-50] [Missing=*]                                                                                                                                                                     |       |            |
|----------------------------|---------------------------------------------------------------------------------------------------------------------------------------------------------------------------------------------------------------------------------|-------|------------|
| Statistics [NW/ W]         | [Valid=4689 /-] [Invalid=0 /-]                                                                                                                                                                                                  |       |            |
| Literal question           | How important do you think coming from a Christian background should be in deciding whether someone should be able to come and live here?                                                                                       |       |            |
| Interviewer's instructions | [Asked if u=2, ran20=2 AND R7OCRECSM_mobile2=0. Version for desktop and tablet users. Mobile users are asked R7OCRECSM3B2_mobile.]<br><br>[Slider is used to give answers. Departure position of the marker is set to value 1.] |       |            |
| Notes                      | Hvor viktig synes du en kristen bakgrunn bør være for å avgjøre om noen skal få bosette seg her? ^f('R7OCRECSM_skal                                                                                                             |       |            |
| Value                      | Label                                                                                                                                                                                                                           | Cases | Percentage |
| 0                          | Not at all                                                                                                                                                                                                                      | 36    | 0.8%       |

# r7ocrecsm3b2: How important is a Christian background in deciding whether someone could come and live here?

| Value | Label | Cases | Percentage |
|-------|-------|-------|------------|
| 1     | 1     | 112   | 2.4%       |
| 2     | 2     | 5     | 0.1%       |
| 3     | 3     | 2     | 0.0%       |
| 4     | 4     | 5     | 0.1%       |
| 5     | 5     | 9     | 0.2%       |
| 6     | 6     | 3     | 0.1%       |
| 7     | 7     | 6     | 0.1%       |
| 8     | 8     | 4     | 0.1%       |
| 9     | 9     | 5     | 0.1%       |
| 10    | 10    | 1     | 0.0%       |
| 11    | 11    | 3     | 0.1%       |
| 12    | 12    | 6     | 0.1%       |
| 13    | 13    | 6     | 0.1%       |
| 14    | 14    | 4     | 0.1%       |
| 15    | 15    | 6     | 0.1%       |
| 16    | 16    | 3     | 0.1%       |
| 17    | 17    | 4     | 0.1%       |
| 18    | 18    | 3     | 0.1%       |
| 19    | 19    | 2     | 0.0%       |
| 20    | 20    | 6     | 0.1%       |
| 21    | 21    | 1     | 0.0%       |
| 22    | 22    | 3     | 0.1%       |
| 23    | 23    | 2     | 0.0%       |
| 24    | 24    | 6     | 0.1%       |
| 25    | 25    | 12    | 0.3%       |
| 26    | 26    | 5     | 0.1%       |
| 27    | 27    | 2     | 0.0%       |
| 28    | 28    | 1     | 0.0%       |
| 29    | 29    | 3     | 0.1%       |
| 30    | 30    | 5     | 0.1%       |
| 31    | 31    | 2     | 0.0%       |
| 32    | 32    | 0     |            |
| 33    | 33    | 1     | 0.0%       |
| 34    | 34    | 2     | 0.0%       |
| 35    | 35    | 1     | 0.0%       |
| 36    | 36    | 5     | 0.1%       |
| 37    | 37    | 2     | 0.0%       |
| 38    | 38    | 1     | 0.0%       |
| 39    | 39    | 0     |            |
| 40    | 40    | 1     | 0.0%       |
| 41    | 41    | 1     | 0.0%       |
| 42    | 42    | 1     | 0.0%       |
| 43    | 43    | 0     |            |
| 44    | 44    | 0     |            |
| 45    | 45    | 1     | 0.0%       |

| # r7ocreasm3b2: How important is a Christian background in deciding whether someone could come and live here?                                               |                                                                                                                                                                                                                                    |       |            |
|-------------------------------------------------------------------------------------------------------------------------------------------------------------|------------------------------------------------------------------------------------------------------------------------------------------------------------------------------------------------------------------------------------|-------|------------|
| Value                                                                                                                                                       | Label                                                                                                                                                                                                                              | Cases | Percentage |
| 46                                                                                                                                                          | 46                                                                                                                                                                                                                                 | 2     | 0.0%       |
| 47                                                                                                                                                          | 47                                                                                                                                                                                                                                 | 0     |            |
| 48                                                                                                                                                          | 48                                                                                                                                                                                                                                 | 0     |            |
| 49                                                                                                                                                          | 49                                                                                                                                                                                                                                 | 0     |            |
| 50                                                                                                                                                          | Completely                                                                                                                                                                                                                         | 5     | 0.1%       |
| 97                                                                                                                                                          | No answer                                                                                                                                                                                                                          | 0     |            |
| 98                                                                                                                                                          | Not asked                                                                                                                                                                                                                          | 4393  | 93.7%      |
| Warning: these figures indicate the number of cases found in the data file. They cannot be interpreted as summary statistics of the population of interest. |                                                                                                                                                                                                                                    |       |            |
| # r7ocreasm3b2_mobile: How important is a Christian background in deciding whether someone could come and live here?                                        |                                                                                                                                                                                                                                    |       |            |
| Information                                                                                                                                                 | [Type= discrete] [Format=numeric] [Range= 0-50] [Missing=*]                                                                                                                                                                        |       |            |
| Statistics [NW/ W]                                                                                                                                          | [Valid=4689 /-] [Invalid=0 /-]                                                                                                                                                                                                     |       |            |
| Literal question                                                                                                                                            | How important do you think coming from a Christian background should be in deciding whether someone should be able to come and live here?                                                                                          |       |            |
| Interviewer's instructions                                                                                                                                  | [Asked if u=2, ran20=2 AND R7OCRECSM_mobile2=1. Version for mobile users due to layout. Desktop/tablet users are asked R7OCRECSM3B2.]<br><br>[Slider is used to give answers. Departure position of the marker is set to value 1.] |       |            |
| Notes                                                                                                                                                       | Hvor viktig synes du en kristen bakgrunn bør være for å avgjøre om noen skal få bosette seg her?                                                                                                                                   |       |            |
| Value                                                                                                                                                       | Label                                                                                                                                                                                                                              | Cases | Percentage |
| 0                                                                                                                                                           | Not at all                                                                                                                                                                                                                         | 18    | 0.4%       |
| 1                                                                                                                                                           | 1                                                                                                                                                                                                                                  | 49    | 1.0%       |
| 2                                                                                                                                                           | 2                                                                                                                                                                                                                                  | 0     |            |
| 3                                                                                                                                                           | 3                                                                                                                                                                                                                                  | 1     | 0.0%       |
| 4                                                                                                                                                           | 4                                                                                                                                                                                                                                  | 0     |            |
| 5                                                                                                                                                           | 5                                                                                                                                                                                                                                  | 0     |            |
| 6                                                                                                                                                           | 6                                                                                                                                                                                                                                  | 2     | 0.0%       |
| 7                                                                                                                                                           | 7                                                                                                                                                                                                                                  | 2     | 0.0%       |
| 8                                                                                                                                                           | 8                                                                                                                                                                                                                                  | 1     | 0.0%       |
| 9                                                                                                                                                           | 9                                                                                                                                                                                                                                  | 1     | 0.0%       |
| 10                                                                                                                                                          | 10                                                                                                                                                                                                                                 | 1     | 0.0%       |
| 11                                                                                                                                                          | 11                                                                                                                                                                                                                                 | 0     |            |
| 12                                                                                                                                                          | 12                                                                                                                                                                                                                                 | 1     | 0.0%       |
| 13                                                                                                                                                          | 13                                                                                                                                                                                                                                 | 0     |            |
| 14                                                                                                                                                          | 14                                                                                                                                                                                                                                 | 0     |            |
| 15                                                                                                                                                          | 15                                                                                                                                                                                                                                 | 0     |            |
| 16                                                                                                                                                          | 16                                                                                                                                                                                                                                 | 2     | 0.0%       |
| 17                                                                                                                                                          | 17                                                                                                                                                                                                                                 | 1     | 0.0%       |
| 18                                                                                                                                                          | 18                                                                                                                                                                                                                                 | 0     |            |
| 19                                                                                                                                                          | 19                                                                                                                                                                                                                                 | 0     |            |
| 20                                                                                                                                                          | 20                                                                                                                                                                                                                                 | 3     | 0.1%       |
| 21                                                                                                                                                          | 21                                                                                                                                                                                                                                 | 1     | 0.0%       |
| 22                                                                                                                                                          | 22                                                                                                                                                                                                                                 | 1     | 0.0%       |
| 23                                                                                                                                                          | 23                                                                                                                                                                                                                                 | 1     | 0.0%       |
| 24                                                                                                                                                          | 24                                                                                                                                                                                                                                 | 2     | 0.0%       |



# r7ocreasm3b2\_mobile: How important is a Christian backround in deciding whether someone could come and live here?

| Value | Label      | Cases | Percentage |
|-------|------------|-------|------------|
| 25    | 25         | 0     |            |
| 26    | 26         | 2     | 0.0%       |
| 27    | 27         | 1     | 0.0%       |
| 28    | 28         | 2     | 0.0%       |
| 29    | 29         | 2     | 0.0%       |
| 30    | 30         | 0     |            |
| 31    | 31         | 1     | 0.0%       |
| 32    | 32         | 0     |            |
| 33    | 33         | 2     | 0.0%       |
| 34    | 34         | 0     |            |
| 35    | 35         | 1     | 0.0%       |
| 36    | 36         | 0     |            |
| 37    | 37         | 0     |            |
| 38    | 38         | 0     |            |
| 39    | 39         | 3     | 0.1%       |
| 40    | 40         | 1     | 0.0%       |
| 41    | 41         | 0     |            |
| 42    | 42         | 1     | 0.0%       |
| 43    | 43         | 2     | 0.0%       |
| 44    | 44         | 0     |            |
| 45    | 45         | 0     |            |
| 46    | 46         | 0     |            |
| 47    | 47         | 0     |            |
| 48    | 48         | 1     | 0.0%       |
| 49    | 49         | 0     |            |
| 50    | Completely | 2     | 0.0%       |
| 97    | No answer  | 0     |            |
| 98    | Not asked  | 4581  | 97.7%      |

Warning: these figures indicate the number of cases found in the data file. They cannot be interpreted as summary statistics of the population of interest.

# r7ocreasm3b3: How important is having skills that Norway needs in deciding whether someone could come and live here?

|                                   |                                                                                                                                                                                                                                |
|-----------------------------------|--------------------------------------------------------------------------------------------------------------------------------------------------------------------------------------------------------------------------------|
| <b>Information</b>                | [Type= discrete] [Format=numeric] [Range= 0-50] [Missing=*]                                                                                                                                                                    |
| <b>Statistics [NW/ W]</b>         | [Valid=4689 /-] [Invalid=0 /-]                                                                                                                                                                                                 |
| <b>Literal question</b>           | How important do you think having work skills that Norway needs should be in deciding whether someone should be able to come and live here?                                                                                    |
| <b>Interviewer's instructions</b> | [Asked if u=2, ran20=2 AND R7OCRECSM_mobile2=0. Version for desktop and tablet users. Mobile users are asked R7OCRECSM3B3_mobile]<br><br>[Slider is used to give answers. Departure position of the marker is set to value 1.] |
| <b>Notes</b>                      | Hvor viktig synes du kunnskaper og ferdigheter som Norge trenger bør være for å avgjøre om noen skal få bosette seg                                                                                                            |

| Value | Label      | Cases | Percentage |
|-------|------------|-------|------------|
| 0     | Not at all | 5     | 0.1%       |
| 1     | 1          | 42    | 0.9%       |
| 2     | 2          | 1     | 0.0%       |

# r7ocrecsm3b3: How important is having skills that Norway needs in deciding whether someone could come and live here?

| Value | Label | Cases | Percentage |
|-------|-------|-------|------------|
| 3     | 3     | 2     | 0.0%       |
| 4     | 4     | 3     | 0.1%       |
| 5     | 5     | 4     | 0.1%       |
| 6     | 6     | 6     | 0.1%       |
| 7     | 7     | 3     | 0.1%       |
| 8     | 8     | 5     | 0.1%       |
| 9     | 9     | 10    | 0.2%       |
| 10    | 10    | 7     | 0.1%       |
| 11    | 11    | 5     | 0.1%       |
| 12    | 12    | 7     | 0.1%       |
| 13    | 13    | 4     | 0.1%       |
| 14    | 14    | 6     | 0.1%       |
| 15    | 15    | 4     | 0.1%       |
| 16    | 16    | 3     | 0.1%       |
| 17    | 17    | 4     | 0.1%       |
| 18    | 18    | 3     | 0.1%       |
| 19    | 19    | 2     | 0.0%       |
| 20    | 20    | 2     | 0.0%       |
| 21    | 21    | 3     | 0.1%       |
| 22    | 22    | 5     | 0.1%       |
| 23    | 23    | 4     | 0.1%       |
| 24    | 24    | 7     | 0.1%       |
| 25    | 25    | 10    | 0.2%       |
| 26    | 26    | 11    | 0.2%       |
| 27    | 27    | 9     | 0.2%       |
| 28    | 28    | 8     | 0.2%       |
| 29    | 29    | 11    | 0.2%       |
| 30    | 30    | 8     | 0.2%       |
| 31    | 31    | 4     | 0.1%       |
| 32    | 32    | 6     | 0.1%       |
| 33    | 33    | 13    | 0.3%       |
| 34    | 34    | 9     | 0.2%       |
| 35    | 35    | 8     | 0.2%       |
| 36    | 36    | 6     | 0.1%       |
| 37    | 37    | 6     | 0.1%       |
| 38    | 38    | 5     | 0.1%       |
| 39    | 39    | 9     | 0.2%       |
| 40    | 40    | 4     | 0.1%       |
| 41    | 41    | 2     | 0.0%       |
| 42    | 42    | 2     | 0.0%       |
| 43    | 43    | 1     | 0.0%       |
| 44    | 44    | 2     | 0.0%       |
| 45    | 45    | 0     |            |
| 46    | 46    | 0     |            |

**# r7ocreasm3b3: How important is having skills that Norway needs in deciding whether someone could come and live here?**

| Value | Label      | Cases | Percentage |
|-------|------------|-------|------------|
| 47    | 47         | 4     | 0.1%       |
| 48    | 48         | 0     |            |
| 49    | 49         | 1     | 0.0%       |
| 50    | Completely | 10    | 0.2%       |
| 97    | No answer  | 0     |            |
| 98    | Not asked  | 4393  | 93.7%      |

*Warning: these figures indicate the number of cases found in the data file. They cannot be interpreted as summary statistics of the population of interest.*

**# r7ocreasm3b3\_mobile: How important is having skills that Norway needs in deciding whether someone could come and live here?**

|                                   |                                                                                                                                                                                                                                    |
|-----------------------------------|------------------------------------------------------------------------------------------------------------------------------------------------------------------------------------------------------------------------------------|
| <b>Information</b>                | [Type= discrete] [Format=numeric] [Range= 0-50] [Missing=*]                                                                                                                                                                        |
| <b>Statistics [NW/ W]</b>         | [Valid=4689 /-] [Invalid=0 /-]                                                                                                                                                                                                     |
| <b>Literal question</b>           | How important do you think having work skills that Norway needs should be in deciding whether someone should be able to come and live here?                                                                                        |
| <b>Interviewer's instructions</b> | [Asked if u=2, ran20=2 AND R7OCRECSM_mobile2=1. Version for mobile users due to layout. Desktop/tablet users are asked R7OCRECSM3B3.]<br><br>[Slider is used to give answers. Departure position of the marker is set to value 1.] |
| <b>Notes</b>                      | Hvor viktig synes du kunnskaper og ferdigheter som Norge trenger bør være for å avgjøre om noen skal få bosette seg                                                                                                                |

| Value | Label      | Cases | Percentage |
|-------|------------|-------|------------|
| 0     | Not at all | 2     | 0.0%       |
| 1     | 1          | 21    | 0.4%       |
| 2     | 2          | 1     | 0.0%       |
| 3     | 3          | 0     |            |
| 4     | 4          | 3     | 0.1%       |
| 5     | 5          | 0     |            |
| 6     | 6          | 0     |            |
| 7     | 7          | 2     | 0.0%       |
| 8     | 8          | 0     |            |
| 9     | 9          | 5     | 0.1%       |
| 10    | 10         | 2     | 0.0%       |
| 11    | 11         | 1     | 0.0%       |
| 12    | 12         | 3     | 0.1%       |
| 13    | 13         | 5     | 0.1%       |
| 14    | 14         | 1     | 0.0%       |
| 15    | 15         | 1     | 0.0%       |
| 16    | 16         | 2     | 0.0%       |
| 17    | 17         | 3     | 0.1%       |
| 18    | 18         | 0     |            |
| 19    | 19         | 0     |            |
| 20    | 20         | 0     |            |
| 21    | 21         | 1     | 0.0%       |
| 22    | 22         | 0     |            |
| 23    | 23         | 1     | 0.0%       |
| 24    | 24         | 3     | 0.1%       |

# r7ocreasm3b3\_mobile: How important is having skills that Norway needs in deciding whether someone could come and live here?

| Value | Label      | Cases | Percentage |
|-------|------------|-------|------------|
| 25    | 25         | 0     |            |
| 26    | 26         | 0     |            |
| 27    | 27         | 1     | 0.0%       |
| 28    | 28         | 2     | 0.0%       |
| 29    | 29         | 4     | 0.1%       |
| 30    | 30         | 3     | 0.1%       |
| 31    | 31         | 5     | 0.1%       |
| 32    | 32         | 3     | 0.1%       |
| 33    | 33         | 0     |            |
| 34    | 34         | 3     | 0.1%       |
| 35    | 35         | 1     | 0.0%       |
| 36    | 36         | 1     | 0.0%       |
| 37    | 37         | 0     |            |
| 38    | 38         | 3     | 0.1%       |
| 39    | 39         | 1     | 0.0%       |
| 40    | 40         | 1     | 0.0%       |
| 41    | 41         | 1     | 0.0%       |
| 42    | 42         | 1     | 0.0%       |
| 43    | 43         | 3     | 0.1%       |
| 44    | 44         | 4     | 0.1%       |
| 45    | 45         | 1     | 0.0%       |
| 46    | 46         | 2     | 0.0%       |
| 47    | 47         | 4     | 0.1%       |
| 48    | 48         | 1     | 0.0%       |
| 49    | 49         | 1     | 0.0%       |
| 50    | Completely | 5     | 0.1%       |
| 97    | No answer  | 0     |            |
| 98    | Not asked  | 4581  | 97.7%      |

Warning: these figures indicate the number of cases found in the data file. They cannot be interpreted as summary statistics of the population of interest.

# r7ocreasm3c1\_1: How important is good education in deciding whether someone could come and live here?

|                                   |                                                                                                                                                                                          |
|-----------------------------------|------------------------------------------------------------------------------------------------------------------------------------------------------------------------------------------|
| <b>Information</b>                | [Type= discrete] [Format=numeric] [Range= 1-5] [Missing=*]                                                                                                                               |
| <b>Statistics [NW/ W]</b>         | [Valid=4689 /-] [Invalid=0 /-]                                                                                                                                                           |
| <b>Literal question</b>           | How important do you think having good educational qualifications should be in deciding whether someone born, brought up and living outside Norway should be able to come and live here? |
| <b>Interviewer's instructions</b> | [Asked if u=2 and ran20=3. ]                                                                                                                                                             |
| <b>Notes</b>                      | R7OCRECSM3C1_1 (Hvor viktig synes du å ha en god utdanning bør være for å avgjøre om noen som er født, oppvokst og                                                                       |

| Value | Label      | Cases | Percentage |
|-------|------------|-------|------------|
| 1     | Not at all | 122   | 2.6%       |
| 2     | 2          | 99    | 2.1%       |
| 3     | 3          | 109   | 2.3%       |
| 4     | 4          | 57    | 1.2%       |
| 5     | Completely | 16    | 0.3%       |
| 97    | No answer  | 14    | 0.3%       |

| # r7ocreasm3c1_1: How important is good education in deciding whether someone could come and live here?                                                            |                                                                                                                                                |       |                   |
|--------------------------------------------------------------------------------------------------------------------------------------------------------------------|------------------------------------------------------------------------------------------------------------------------------------------------|-------|-------------------|
| Value                                                                                                                                                              | Label                                                                                                                                          | Cases | Percentage        |
| 98                                                                                                                                                                 | Not asked                                                                                                                                      | 4272  | <div></div> 91.1% |
| <i>Warning: these figures indicate the number of cases found in the data file. They cannot be interpreted as summary statistics of the population of interest.</i> |                                                                                                                                                |       |                   |
| # r7ocreasm3c2_1: How important is a Christian background in deciding whether someone could come and live here?                                                    |                                                                                                                                                |       |                   |
| Information                                                                                                                                                        | [Type= discrete] [Format=numeric] [Range= 1-5] [Missing=*]                                                                                     |       |                   |
| Statistics [NW/ W]                                                                                                                                                 | [Valid=4689 /-] [Invalid=0 /-]                                                                                                                 |       |                   |
| Literal question                                                                                                                                                   | How important do you think coming from a Christian background should be in deciding whether someone should be able to come and live here?      |       |                   |
| Interviewer's instructions                                                                                                                                         | [Asked if u=2 and ran20=3. ]                                                                                                                   |       |                   |
| Notes                                                                                                                                                              | R7OCRECSM3C2_1 (Hvor viktig synes du en kristen bakgrunn bør være for å avgjøre om noen skal få bosette seg her? )                             |       |                   |
| Value                                                                                                                                                              | Label                                                                                                                                          | Cases | Percentage        |
| 1                                                                                                                                                                  | Not at all                                                                                                                                     | 264   | <div></div> 5.6%  |
| 2                                                                                                                                                                  | 2                                                                                                                                              | 47    | <div></div> 1.0%  |
| 3                                                                                                                                                                  | 3                                                                                                                                              | 51    | <div></div> 1.1%  |
| 4                                                                                                                                                                  | 4                                                                                                                                              | 29    | <div></div> 0.6%  |
| 5                                                                                                                                                                  | Completely                                                                                                                                     | 10    | <div></div> 0.2%  |
| 97                                                                                                                                                                 | No answer                                                                                                                                      | 16    | <div></div> 0.3%  |
| 98                                                                                                                                                                 | Not asked                                                                                                                                      | 4272  | <div></div> 91.1% |
| <i>Warning: these figures indicate the number of cases found in the data file. They cannot be interpreted as summary statistics of the population of interest.</i> |                                                                                                                                                |       |                   |
| # r7ocreasm3c3_1: How important is having skills that Norway needs in deciding whether someone could come and live here?                                           |                                                                                                                                                |       |                   |
| Information                                                                                                                                                        | [Type= discrete] [Format=numeric] [Range= 1-5] [Missing=*]                                                                                     |       |                   |
| Statistics [NW/ W]                                                                                                                                                 | [Valid=4689 /-] [Invalid=0 /-]                                                                                                                 |       |                   |
| Literal question                                                                                                                                                   | How important do you think having work skills that Norway needs should be in deciding whether someone should be able to come and live here?    |       |                   |
| Interviewer's instructions                                                                                                                                         | [Asked if u=2 and ran20=3. ]                                                                                                                   |       |                   |
| Notes                                                                                                                                                              | R7OCRECSM3C3_1 (Hvor viktig synes du kunnskaper og ferdigheter som Norge trenger bør være for å avgjøre om noen skal                           |       |                   |
| Value                                                                                                                                                              | Label                                                                                                                                          | Cases | Percentage        |
| 1                                                                                                                                                                  | Not at all                                                                                                                                     | 91    | <div></div> 1.9%  |
| 2                                                                                                                                                                  | 2                                                                                                                                              | 96    | <div></div> 2.0%  |
| 3                                                                                                                                                                  | 3                                                                                                                                              | 108   | <div></div> 2.3%  |
| 4                                                                                                                                                                  | 4                                                                                                                                              | 82    | <div></div> 1.7%  |
| 5                                                                                                                                                                  | Completely                                                                                                                                     | 26    | <div></div> 0.6%  |
| 97                                                                                                                                                                 | No answer                                                                                                                                      | 14    | <div></div> 0.3%  |
| 98                                                                                                                                                                 | Not asked                                                                                                                                      | 4272  | <div></div> 91.1% |
| <i>Warning: these figures indicate the number of cases found in the data file. They cannot be interpreted as summary statistics of the population of interest.</i> |                                                                                                                                                |       |                   |
| # r7ocreasm4a1: To what extent should the Supreme Court's power in controversial issues be reduced?                                                                |                                                                                                                                                |       |                   |
| Information                                                                                                                                                        | [Type= discrete] [Format=numeric] [Range= 0-50] [Missing=*]                                                                                    |       |                   |
| Statistics [NW/ W]                                                                                                                                                 | [Valid=4689 /-] [Invalid=0 /-]                                                                                                                 |       |                   |
| Literal question                                                                                                                                                   | In general, to what extent do you think the Norwegian Supreme Court's power to decide certain types of controversial issues should be reduced? |       |                   |
| Interviewer's instructions                                                                                                                                         | [Asked if u=2, ran20=1 AND R7OCRECSM_mobile2=0. Version for desktop and tablet users. Mobile users are asked R7OCRECSM4A1_mobile.]             |       |                   |
|                                                                                                                                                                    | [Slider is used to give answers. Departure position of the marker is set to value 25.]                                                         |       |                   |

# **# r70crecsm4a1: To what extent should the Supreme Court's power in controversial issues be reduced?**

## **Notes**

Generelt sett, i hvilken grad mener du at Norges Høyesteretts makt til å avgjøre visse typer kontroversielle saker bør

| Value | Label      | Cases | Percentage |
|-------|------------|-------|------------|
| 0     | Not at all | 47    | 1.0%       |
| 1     | 1          | 9     | 0.2%       |
| 2     | 2          | 6     | 0.1%       |
| 3     | 3          | 8     | 0.2%       |
| 4     | 4          | 8     | 0.2%       |
| 5     | 5          | 3     | 0.1%       |
| 6     | 6          | 4     | 0.1%       |
| 7     | 7          | 4     | 0.1%       |
| 8     | 8          | 2     | 0.0%       |
| 9     | 9          | 5     | 0.1%       |
| 10    | 10         | 5     | 0.1%       |
| 11    | 11         | 4     | 0.1%       |
| 12    | 12         | 10    | 0.2%       |
| 13    | 13         | 3     | 0.1%       |
| 14    | 14         | 2     | 0.0%       |
| 15    | 15         | 11    | 0.2%       |
| 16    | 16         | 8     | 0.2%       |
| 17    | 17         | 10    | 0.2%       |
| 18    | 18         | 5     | 0.1%       |
| 19    | 19         | 5     | 0.1%       |
| 20    | 20         | 4     | 0.1%       |
| 21    | 21         | 1     | 0.0%       |
| 22    | 22         | 3     | 0.1%       |
| 23    | 23         | 0     |            |
| 24    | 24         | 5     | 0.1%       |
| 25    | 25         | 72    | 1.5%       |
| 26    | 26         | 2     | 0.0%       |
| 27    | 27         | 3     | 0.1%       |
| 28    | 28         | 3     | 0.1%       |
| 29    | 29         | 4     | 0.1%       |
| 30    | 30         | 1     | 0.0%       |
| 31    | 31         | 4     | 0.1%       |
| 32    | 32         | 2     | 0.0%       |
| 33    | 33         | 1     | 0.0%       |
| 34    | 34         | 1     | 0.0%       |
| 35    | 35         | 1     | 0.0%       |
| 36    | 36         | 3     | 0.1%       |
| 37    | 37         | 2     | 0.0%       |
| 38    | 38         | 0     |            |
| 39    | 39         | 1     | 0.0%       |
| 40    | 40         | 1     | 0.0%       |
| 41    | 41         | 0     |            |
| 42    | 42         | 1     | 0.0%       |
| 43    | 43         | 1     | 0.0%       |

| # r7ocreasm4a1: To what extent should the Supreme Court's power in controversial issues be reduced?                                                         |                                                                                                                                                                                                                                     |       |            |
|-------------------------------------------------------------------------------------------------------------------------------------------------------------|-------------------------------------------------------------------------------------------------------------------------------------------------------------------------------------------------------------------------------------|-------|------------|
| Value                                                                                                                                                       | Label                                                                                                                                                                                                                               | Cases | Percentage |
| 44                                                                                                                                                          | 44                                                                                                                                                                                                                                  | 0     |            |
| 45                                                                                                                                                          | 45                                                                                                                                                                                                                                  | 0     |            |
| 46                                                                                                                                                          | 46                                                                                                                                                                                                                                  | 0     |            |
| 47                                                                                                                                                          | 47                                                                                                                                                                                                                                  | 0     |            |
| 48                                                                                                                                                          | 48                                                                                                                                                                                                                                  | 0     |            |
| 49                                                                                                                                                          | 49                                                                                                                                                                                                                                  | 1     | 0.0%       |
| 50                                                                                                                                                          | Completely                                                                                                                                                                                                                          | 1     | 0.0%       |
| 97                                                                                                                                                          | No answer                                                                                                                                                                                                                           | 0     |            |
| 98                                                                                                                                                          | Not asked                                                                                                                                                                                                                           | 4412  | 94.1%      |
| Warning: these figures indicate the number of cases found in the data file. They cannot be interpreted as summary statistics of the population of interest. |                                                                                                                                                                                                                                     |       |            |
| # r7ocreasm4a1_mobile: To what extent should the Supreme Court's power in controversial issues be reduced?                                                  |                                                                                                                                                                                                                                     |       |            |
| Information                                                                                                                                                 | [Type= discrete] [Format=numeric] [Range= 0-50] [Missing=*]                                                                                                                                                                         |       |            |
| Statistics [NW/ W]                                                                                                                                          | [Valid=4689 /-] [Invalid=0 /-]                                                                                                                                                                                                      |       |            |
| Literal question                                                                                                                                            | In general, to what extent do you think the Norwegian Supreme Court's power to decide certain types of controversial issues should be reduced?                                                                                      |       |            |
| Interviewer's instructions                                                                                                                                  | [Asked if u=2, ran20=1 AND R7OCRECSM_mobile2=1. Version for mobile users due to layout. Desktop/tablet users are asked R7OCRECSM4A1.]<br><br>[Slider is used to give answers. Departure position of the marker is set to value 25.] |       |            |
| Notes                                                                                                                                                       | Generelt sett, i hvilken grad mener du at Norges Høyesteretts makt til å avgjøre visse typer kontroversielle saker bør                                                                                                              |       |            |
| Value                                                                                                                                                       | Label                                                                                                                                                                                                                               | Cases | Percentage |
| 0                                                                                                                                                           | Not at all                                                                                                                                                                                                                          | 9     | 0.2%       |
| 1                                                                                                                                                           | 1                                                                                                                                                                                                                                   | 1     | 0.0%       |
| 2                                                                                                                                                           | 2                                                                                                                                                                                                                                   | 1     | 0.0%       |
| 3                                                                                                                                                           | 3                                                                                                                                                                                                                                   | 0     |            |
| 4                                                                                                                                                           | 4                                                                                                                                                                                                                                   | 1     | 0.0%       |
| 5                                                                                                                                                           | 5                                                                                                                                                                                                                                   | 2     | 0.0%       |
| 6                                                                                                                                                           | 6                                                                                                                                                                                                                                   | 2     | 0.0%       |
| 7                                                                                                                                                           | 7                                                                                                                                                                                                                                   | 1     | 0.0%       |
| 8                                                                                                                                                           | 8                                                                                                                                                                                                                                   | 2     | 0.0%       |
| 9                                                                                                                                                           | 9                                                                                                                                                                                                                                   | 1     | 0.0%       |
| 10                                                                                                                                                          | 10                                                                                                                                                                                                                                  | 4     | 0.1%       |
| 11                                                                                                                                                          | 11                                                                                                                                                                                                                                  | 2     | 0.0%       |
| 12                                                                                                                                                          | 12                                                                                                                                                                                                                                  | 1     | 0.0%       |
| 13                                                                                                                                                          | 13                                                                                                                                                                                                                                  | 4     | 0.1%       |
| 14                                                                                                                                                          | 14                                                                                                                                                                                                                                  | 0     |            |
| 15                                                                                                                                                          | 15                                                                                                                                                                                                                                  | 2     | 0.0%       |
| 16                                                                                                                                                          | 16                                                                                                                                                                                                                                  | 2     | 0.0%       |
| 17                                                                                                                                                          | 17                                                                                                                                                                                                                                  | 1     | 0.0%       |
| 18                                                                                                                                                          | 18                                                                                                                                                                                                                                  | 2     | 0.0%       |
| 19                                                                                                                                                          | 19                                                                                                                                                                                                                                  | 0     |            |
| 20                                                                                                                                                          | 20                                                                                                                                                                                                                                  | 2     | 0.0%       |
| 21                                                                                                                                                          | 21                                                                                                                                                                                                                                  | 1     | 0.0%       |
| 22                                                                                                                                                          | 22                                                                                                                                                                                                                                  | 0     |            |
| 23                                                                                                                                                          | 23                                                                                                                                                                                                                                  | 0     |            |

| # r7ocreasm4a1_mobile: To what extent should the Supreme Court's power in controversial issues be reduced?                                                  |                                                                                                                                                                                                                                  |       |            |
|-------------------------------------------------------------------------------------------------------------------------------------------------------------|----------------------------------------------------------------------------------------------------------------------------------------------------------------------------------------------------------------------------------|-------|------------|
| Value                                                                                                                                                       | Label                                                                                                                                                                                                                            | Cases | Percentage |
| 24                                                                                                                                                          | 24                                                                                                                                                                                                                               | 0     |            |
| 25                                                                                                                                                          | 25                                                                                                                                                                                                                               | 37    | 0.8%       |
| 26                                                                                                                                                          | 26                                                                                                                                                                                                                               | 1     | 0.0%       |
| 27                                                                                                                                                          | 27                                                                                                                                                                                                                               | 0     |            |
| 28                                                                                                                                                          | 28                                                                                                                                                                                                                               | 0     |            |
| 29                                                                                                                                                          | 29                                                                                                                                                                                                                               | 1     | 0.0%       |
| 30                                                                                                                                                          | 30                                                                                                                                                                                                                               | 1     | 0.0%       |
| 31                                                                                                                                                          | 31                                                                                                                                                                                                                               | 0     |            |
| 32                                                                                                                                                          | 32                                                                                                                                                                                                                               | 1     | 0.0%       |
| 33                                                                                                                                                          | 33                                                                                                                                                                                                                               | 0     |            |
| 34                                                                                                                                                          | 34                                                                                                                                                                                                                               | 1     | 0.0%       |
| 35                                                                                                                                                          | 35                                                                                                                                                                                                                               | 2     | 0.0%       |
| 36                                                                                                                                                          | 36                                                                                                                                                                                                                               | 0     |            |
| 37                                                                                                                                                          | 37                                                                                                                                                                                                                               | 1     | 0.0%       |
| 38                                                                                                                                                          | 38                                                                                                                                                                                                                               | 0     |            |
| 39                                                                                                                                                          | 39                                                                                                                                                                                                                               | 0     |            |
| 40                                                                                                                                                          | 40                                                                                                                                                                                                                               | 0     |            |
| 41                                                                                                                                                          | 41                                                                                                                                                                                                                               | 0     |            |
| 42                                                                                                                                                          | 42                                                                                                                                                                                                                               | 0     |            |
| 43                                                                                                                                                          | 43                                                                                                                                                                                                                               | 0     |            |
| 44                                                                                                                                                          | 44                                                                                                                                                                                                                               | 0     |            |
| 45                                                                                                                                                          | 45                                                                                                                                                                                                                               | 0     |            |
| 46                                                                                                                                                          | 46                                                                                                                                                                                                                               | 1     | 0.0%       |
| 47                                                                                                                                                          | 47                                                                                                                                                                                                                               | 0     |            |
| 48                                                                                                                                                          | 48                                                                                                                                                                                                                               | 0     |            |
| 49                                                                                                                                                          | 49                                                                                                                                                                                                                               | 0     |            |
| 50                                                                                                                                                          | Completely                                                                                                                                                                                                                       | 1     | 0.0%       |
| 97                                                                                                                                                          | No answer                                                                                                                                                                                                                        | 0     |            |
| 98                                                                                                                                                          | Not asked                                                                                                                                                                                                                        | 4601  | 98.1%      |
| Warning: these figures indicate the number of cases found in the data file. They cannot be interpreted as summary statistics of the population of interest. |                                                                                                                                                                                                                                  |       |            |
| # r7ocreasm4a2: To what extent does the Supreme Court favor certain groups?                                                                                 |                                                                                                                                                                                                                                  |       |            |
| Information                                                                                                                                                 | [Type= discrete] [Format=numeric] [Range= 0-50] [Missing=*]                                                                                                                                                                      |       |            |
| Statistics [NW/ W]                                                                                                                                          | [Valid=4689 /-] [Invalid=0 /-]                                                                                                                                                                                                   |       |            |
| Literal question                                                                                                                                            | To what extent do you think the decisions of the Norwegian Supreme Court favor certain groups more than others?                                                                                                                  |       |            |
| Interviewer's instructions                                                                                                                                  | [Asked if u=2, ran20=1 AND R7OCRECSM_mobile2=0. Version for desktop and tablet users. Mobile users are asked R7OCRECSM4A2_mobile.]<br><br>[Slider is used to give answers. Departure position of the marker is set to value 25.] |       |            |
| Notes                                                                                                                                                       | I hvilken grad mener du at avgjørelsene til Norges Høyesterett favoriserer enkelte grupper mer enn andre? ^f('R7OCRECS                                                                                                           |       |            |
| Value                                                                                                                                                       | Label                                                                                                                                                                                                                            | Cases | Percentage |
| 0                                                                                                                                                           | Not at all                                                                                                                                                                                                                       | 37    | 0.8%       |
| 1                                                                                                                                                           | 1                                                                                                                                                                                                                                | 8     | 0.2%       |
| 2                                                                                                                                                           | 2                                                                                                                                                                                                                                | 5     | 0.1%       |
| 3                                                                                                                                                           | 3                                                                                                                                                                                                                                | 6     | 0.1%       |
| 4                                                                                                                                                           | 4                                                                                                                                                                                                                                | 9     | 0.2%       |



# r7ocrecsm4a2: To what extent does the Supreme Court favor certain groups?

| Value | Label | Cases | Percentage |
|-------|-------|-------|------------|
| 5     | 5     | 12    | 0.3%       |
| 6     | 6     | 7     | 0.1%       |
| 7     | 7     | 6     | 0.1%       |
| 8     | 8     | 7     | 0.1%       |
| 9     | 9     | 4     | 0.1%       |
| 10    | 10    | 6     | 0.1%       |
| 11    | 11    | 7     | 0.1%       |
| 12    | 12    | 5     | 0.1%       |
| 13    | 13    | 2     | 0.0%       |
| 14    | 14    | 2     | 0.0%       |
| 15    | 15    | 5     | 0.1%       |
| 16    | 16    | 4     | 0.1%       |
| 17    | 17    | 7     | 0.1%       |
| 18    | 18    | 6     | 0.1%       |
| 19    | 19    | 0     |            |
| 20    | 20    | 1     | 0.0%       |
| 21    | 21    | 2     | 0.0%       |
| 22    | 22    | 1     | 0.0%       |
| 23    | 23    | 1     | 0.0%       |
| 24    | 24    | 4     | 0.1%       |
| 25    | 25    | 87    | 1.9%       |
| 26    | 26    | 0     |            |
| 27    | 27    | 3     | 0.1%       |
| 28    | 28    | 3     | 0.1%       |
| 29    | 29    | 2     | 0.0%       |
| 30    | 30    | 7     | 0.1%       |
| 31    | 31    | 3     | 0.1%       |
| 32    | 32    | 3     | 0.1%       |
| 33    | 33    | 1     | 0.0%       |
| 34    | 34    | 3     | 0.1%       |
| 35    | 35    | 3     | 0.1%       |
| 36    | 36    | 0     |            |
| 37    | 37    | 2     | 0.0%       |
| 38    | 38    | 2     | 0.0%       |
| 39    | 39    | 1     | 0.0%       |
| 40    | 40    | 0     |            |
| 41    | 41    | 0     |            |
| 42    | 42    | 1     | 0.0%       |
| 43    | 43    | 0     |            |
| 44    | 44    | 0     |            |
| 45    | 45    | 0     |            |
| 46    | 46    | 0     |            |
| 47    | 47    | 1     | 0.0%       |
| 48    | 48    | 0     |            |
| 49    | 49    | 0     |            |

| # r7ocreasm4a2: To what extent does the Supreme Court favor certain groups?                                                                                 |                                                                                                                                       |       |            |
|-------------------------------------------------------------------------------------------------------------------------------------------------------------|---------------------------------------------------------------------------------------------------------------------------------------|-------|------------|
| Value                                                                                                                                                       | Label                                                                                                                                 | Cases | Percentage |
| 50                                                                                                                                                          | Completely                                                                                                                            | 1     | 0.0%       |
| 97                                                                                                                                                          | No answer                                                                                                                             | 0     |            |
| 98                                                                                                                                                          | Not asked                                                                                                                             | 4412  | 94.1%      |
| Warning: these figures indicate the number of cases found in the data file. They cannot be interpreted as summary statistics of the population of interest. |                                                                                                                                       |       |            |
| # r7ocreasm4a2_mobile: To what extent does the Supreme Court favor certain groups?                                                                          |                                                                                                                                       |       |            |
| Information                                                                                                                                                 | [Type= discrete] [Format=numeric] [Range= 0-50] [Missing=*]                                                                           |       |            |
| Statistics [NW/ W]                                                                                                                                          | [Valid=4689 /-] [Invalid=0 /-]                                                                                                        |       |            |
| Literal question                                                                                                                                            | To what extent do you think the decisions of the Norwegian Supreme Court favor certain groups more than others?                       |       |            |
| Interviewer's instructions                                                                                                                                  | [Asked if u=2, ran20=1 AND R7OCRECSM_mobile2=1. Version for mobile users due to layout. Desktop/tablet users are asked R7OCRECSM4A2.] |       |            |
|                                                                                                                                                             | [Slider is used to give answers. Departure position of the marker is set to value 25.]                                                |       |            |
| Notes                                                                                                                                                       | I hvilken grad mener du at avgjørelsene til Norges Høyesterett favoriserer enkelte grupper mer enn andre?                             |       |            |
| Value                                                                                                                                                       | Label                                                                                                                                 | Cases | Percentage |
| 0                                                                                                                                                           | Not at all                                                                                                                            | 9     | 0.2%       |
| 1                                                                                                                                                           | 1                                                                                                                                     | 1     | 0.0%       |
| 2                                                                                                                                                           | 2                                                                                                                                     | 0     |            |
| 3                                                                                                                                                           | 3                                                                                                                                     | 3     | 0.1%       |
| 4                                                                                                                                                           | 4                                                                                                                                     | 0     |            |
| 5                                                                                                                                                           | 5                                                                                                                                     | 2     | 0.0%       |
| 6                                                                                                                                                           | 6                                                                                                                                     | 5     | 0.1%       |
| 7                                                                                                                                                           | 7                                                                                                                                     | 1     | 0.0%       |
| 8                                                                                                                                                           | 8                                                                                                                                     | 0     |            |
| 9                                                                                                                                                           | 9                                                                                                                                     | 2     | 0.0%       |
| 10                                                                                                                                                          | 10                                                                                                                                    | 2     | 0.0%       |
| 11                                                                                                                                                          | 11                                                                                                                                    | 0     |            |
| 12                                                                                                                                                          | 12                                                                                                                                    | 1     | 0.0%       |
| 13                                                                                                                                                          | 13                                                                                                                                    | 3     | 0.1%       |
| 14                                                                                                                                                          | 14                                                                                                                                    | 0     |            |
| 15                                                                                                                                                          | 15                                                                                                                                    | 1     | 0.0%       |
| 16                                                                                                                                                          | 16                                                                                                                                    | 2     | 0.0%       |
| 17                                                                                                                                                          | 17                                                                                                                                    | 0     |            |
| 18                                                                                                                                                          | 18                                                                                                                                    | 0     |            |
| 19                                                                                                                                                          | 19                                                                                                                                    | 2     | 0.0%       |
| 20                                                                                                                                                          | 20                                                                                                                                    | 0     |            |
| 21                                                                                                                                                          | 21                                                                                                                                    | 1     | 0.0%       |
| 22                                                                                                                                                          | 22                                                                                                                                    | 0     |            |
| 23                                                                                                                                                          | 23                                                                                                                                    | 0     |            |
| 24                                                                                                                                                          | 24                                                                                                                                    | 0     |            |
| 25                                                                                                                                                          | 25                                                                                                                                    | 32    | 0.7%       |
| 26                                                                                                                                                          | 26                                                                                                                                    | 1     | 0.0%       |
| 27                                                                                                                                                          | 27                                                                                                                                    | 1     | 0.0%       |
| 28                                                                                                                                                          | 28                                                                                                                                    | 0     |            |
| 29                                                                                                                                                          | 29                                                                                                                                    | 1     | 0.0%       |
| 30                                                                                                                                                          | 30                                                                                                                                    | 5     | 0.1%       |

| # r7ocreasm4a2_mobile: To what extent does the Supreme Court favor certain groups?                                                                          |                                                                                                                                                                                                                                  |       |            |
|-------------------------------------------------------------------------------------------------------------------------------------------------------------|----------------------------------------------------------------------------------------------------------------------------------------------------------------------------------------------------------------------------------|-------|------------|
| Value                                                                                                                                                       | Label                                                                                                                                                                                                                            | Cases | Percentage |
| 31                                                                                                                                                          | 31                                                                                                                                                                                                                               | 1     | 0.0%       |
| 32                                                                                                                                                          | 32                                                                                                                                                                                                                               | 3     | 0.1%       |
| 33                                                                                                                                                          | 33                                                                                                                                                                                                                               | 0     |            |
| 34                                                                                                                                                          | 34                                                                                                                                                                                                                               | 1     | 0.0%       |
| 35                                                                                                                                                          | 35                                                                                                                                                                                                                               | 0     |            |
| 36                                                                                                                                                          | 36                                                                                                                                                                                                                               | 3     | 0.1%       |
| 37                                                                                                                                                          | 37                                                                                                                                                                                                                               | 1     | 0.0%       |
| 38                                                                                                                                                          | 38                                                                                                                                                                                                                               | 1     | 0.0%       |
| 39                                                                                                                                                          | 39                                                                                                                                                                                                                               | 0     |            |
| 40                                                                                                                                                          | 40                                                                                                                                                                                                                               | 0     |            |
| 41                                                                                                                                                          | 41                                                                                                                                                                                                                               | 0     |            |
| 42                                                                                                                                                          | 42                                                                                                                                                                                                                               | 0     |            |
| 43                                                                                                                                                          | 43                                                                                                                                                                                                                               | 0     |            |
| 44                                                                                                                                                          | 44                                                                                                                                                                                                                               | 1     | 0.0%       |
| 45                                                                                                                                                          | 45                                                                                                                                                                                                                               | 0     |            |
| 46                                                                                                                                                          | 46                                                                                                                                                                                                                               | 0     |            |
| 47                                                                                                                                                          | 47                                                                                                                                                                                                                               | 0     |            |
| 48                                                                                                                                                          | 48                                                                                                                                                                                                                               | 0     |            |
| 49                                                                                                                                                          | 49                                                                                                                                                                                                                               | 0     |            |
| 50                                                                                                                                                          | Completely                                                                                                                                                                                                                       | 2     | 0.0%       |
| 97                                                                                                                                                          | No answer                                                                                                                                                                                                                        | 0     |            |
| 98                                                                                                                                                          | Not asked                                                                                                                                                                                                                        | 4601  | 98.1%      |
| Warning: these figures indicate the number of cases found in the data file. They cannot be interpreted as summary statistics of the population of interest. |                                                                                                                                                                                                                                  |       |            |
| # r7ocreasm4a3: To what extent could the Supreme Court be dissolved, if it makes several decisions most people disagree with?                               |                                                                                                                                                                                                                                  |       |            |
| Information                                                                                                                                                 | [Type= discrete] [Format=numeric] [Range= 0-50] [Missing=*]                                                                                                                                                                      |       |            |
| Statistics [NW/ W]                                                                                                                                          | [Valid=4689 /-] [Invalid=0 /-]                                                                                                                                                                                                   |       |            |
| Literal question                                                                                                                                            | And to what extent do you think that If the Norwegian Supreme Court starts to make several decisions that most people disagree with, the institution might just as well be dissolved?                                            |       |            |
| Interviewer's instructions                                                                                                                                  | [Asked if u=2, ran20=1 AND R7OCRECSM_mobile2=0. Version for desktop and tablet users. Mobile users are asked R7OCRECSM4A3_mobile.]<br><br>[Slider is used to give answers. Departure position of the marker is set to value 25.] |       |            |
| Notes                                                                                                                                                       | Og i hvilken grad mener du at dersom Norges Høyesterett begynner å ta mange avgjørelser som folk flest er uenige i, ka                                                                                                           |       |            |
| Value                                                                                                                                                       | Label                                                                                                                                                                                                                            | Cases | Percentage |
| 0                                                                                                                                                           | Not at all                                                                                                                                                                                                                       | 64    | 1.4%       |
| 1                                                                                                                                                           | 1                                                                                                                                                                                                                                | 11    | 0.2%       |
| 2                                                                                                                                                           | 2                                                                                                                                                                                                                                | 7     | 0.1%       |
| 3                                                                                                                                                           | 3                                                                                                                                                                                                                                | 7     | 0.1%       |
| 4                                                                                                                                                           | 4                                                                                                                                                                                                                                | 6     | 0.1%       |
| 5                                                                                                                                                           | 5                                                                                                                                                                                                                                | 7     | 0.1%       |
| 6                                                                                                                                                           | 6                                                                                                                                                                                                                                | 8     | 0.2%       |
| 7                                                                                                                                                           | 7                                                                                                                                                                                                                                | 5     | 0.1%       |
| 8                                                                                                                                                           | 8                                                                                                                                                                                                                                | 4     | 0.1%       |
| 9                                                                                                                                                           | 9                                                                                                                                                                                                                                | 8     | 0.2%       |

**# r7ocrecsm4a3: To what extent could the Supreme Court be dissolved, if it makes several decisions most people disagree with?**

| Value | Label      | Cases | Percentage |
|-------|------------|-------|------------|
| 10    | 10         | 7     | 0.1%       |
| 11    | 11         | 4     | 0.1%       |
| 12    | 12         | 6     | 0.1%       |
| 13    | 13         | 3     | 0.1%       |
| 14    | 14         | 4     | 0.1%       |
| 15    | 15         | 6     | 0.1%       |
| 16    | 16         | 5     | 0.1%       |
| 17    | 17         | 2     | 0.0%       |
| 18    | 18         | 4     | 0.1%       |
| 19    | 19         | 2     | 0.0%       |
| 20    | 20         | 3     | 0.1%       |
| 21    | 21         | 1     | 0.0%       |
| 22    | 22         | 1     | 0.0%       |
| 23    | 23         | 1     | 0.0%       |
| 24    | 24         | 2     | 0.0%       |
| 25    | 25         | 60    | 1.3%       |
| 26    | 26         | 0     |            |
| 27    | 27         | 3     | 0.1%       |
| 28    | 28         | 1     | 0.0%       |
| 29    | 29         | 5     | 0.1%       |
| 30    | 30         | 4     | 0.1%       |
| 31    | 31         | 6     | 0.1%       |
| 32    | 32         | 2     | 0.0%       |
| 33    | 33         | 0     |            |
| 34    | 34         | 1     | 0.0%       |
| 35    | 35         | 2     | 0.0%       |
| 36    | 36         | 4     | 0.1%       |
| 37    | 37         | 2     | 0.0%       |
| 38    | 38         | 2     | 0.0%       |
| 39    | 39         | 0     |            |
| 40    | 40         | 1     | 0.0%       |
| 41    | 41         | 1     | 0.0%       |
| 42    | 42         | 0     |            |
| 43    | 43         | 1     | 0.0%       |
| 44    | 44         | 0     |            |
| 45    | 45         | 0     |            |
| 46    | 46         | 2     | 0.0%       |
| 47    | 47         | 0     |            |
| 48    | 48         | 0     |            |
| 49    | 49         | 0     |            |
| 50    | Completely | 2     | 0.0%       |
| 97    | No answer  | 0     |            |
| 98    | Not asked  | 4412  | 94.1%      |

*Warning: these figures indicate the number of cases found in the data file. They cannot be interpreted as summary statistics of the population of interest.*

**# r7ocreasm4a3\_mobile: To what extent could the Supreme Court be dissolved, if it makes several decisions most people disagree with?**

|                                   |                                                                                                                                                                                                                                     |
|-----------------------------------|-------------------------------------------------------------------------------------------------------------------------------------------------------------------------------------------------------------------------------------|
| <b>Information</b>                | [Type= discrete] [Format=numeric] [Range= 0-50] [Missing=*]                                                                                                                                                                         |
| <b>Statistics [NW/ W]</b>         | [Valid=4689 /-] [Invalid=0 /-]                                                                                                                                                                                                      |
| <b>Literal question</b>           | And to what extent do you think that If the Norwegian Supreme Court starts to make several decisions that most people disagree with, the institution might just as well be dissolved?                                               |
| <b>Interviewer's instructions</b> | [Asked if u=2, ran20=1 AND R7OCRECSM_mobile2=1. Version for mobile users due to layout. Desktop/tablet users are asked R7OCRECSM4A3.]<br><br>[Slider is used to give answers. Departure position of the marker is set to value 25.] |
| <b>Notes</b>                      | Og i hvilken grad mener du at dersom Norges Høyesterett begynner å ta mange avgjørelser som folk flest er uenige i, ka                                                                                                              |

| Value | Label      | Cases | Percentage |
|-------|------------|-------|------------|
| 0     | Not at all | 15    | 0.3%       |
| 1     | 1          | 2     | 0.0%       |
| 2     | 2          | 0     |            |
| 3     | 3          | 1     | 0.0%       |
| 4     | 4          | 2     | 0.0%       |
| 5     | 5          | 1     | 0.0%       |
| 6     | 6          | 2     | 0.0%       |
| 7     | 7          | 1     | 0.0%       |
| 8     | 8          | 1     | 0.0%       |
| 9     | 9          | 2     | 0.0%       |
| 10    | 10         | 3     | 0.1%       |
| 11    | 11         | 1     | 0.0%       |
| 12    | 12         | 2     | 0.0%       |
| 13    | 13         | 0     |            |
| 14    | 14         | 2     | 0.0%       |
| 15    | 15         | 3     | 0.1%       |
| 16    | 16         | 2     | 0.0%       |
| 17    | 17         | 2     | 0.0%       |
| 18    | 18         | 0     |            |
| 19    | 19         | 1     | 0.0%       |
| 20    | 20         | 1     | 0.0%       |
| 21    | 21         | 1     | 0.0%       |
| 22    | 22         | 1     | 0.0%       |
| 23    | 23         | 0     |            |
| 24    | 24         | 0     |            |
| 25    | 25         | 26    | 0.6%       |
| 26    | 26         | 0     |            |
| 27    | 27         | 1     | 0.0%       |
| 28    | 28         | 1     | 0.0%       |
| 29    | 29         | 2     | 0.0%       |
| 30    | 30         | 0     |            |
| 31    | 31         | 2     | 0.0%       |
| 32    | 32         | 0     |            |
| 33    | 33         | 0     |            |
| 34    | 34         | 1     | 0.0%       |
| 35    | 35         | 0     |            |

**# r7ocreasm4a3\_mobile: To what extent could the Supreme Court be dissolved, if it makes several decisions most people disagree with?**

| Value | Label      | Cases | Percentage |
|-------|------------|-------|------------|
| 36    | 36         | 0     |            |
| 37    | 37         | 0     |            |
| 38    | 38         | 2     | 0.0%       |
| 39    | 39         | 1     | 0.0%       |
| 40    | 40         | 0     |            |
| 41    | 41         | 0     |            |
| 42    | 42         | 0     |            |
| 43    | 43         | 3     | 0.1%       |
| 44    | 44         | 0     |            |
| 45    | 45         | 0     |            |
| 46    | 46         | 0     |            |
| 47    | 47         | 2     | 0.0%       |
| 48    | 48         | 0     |            |
| 49    | 49         | 0     |            |
| 50    | Completely | 1     | 0.0%       |
| 97    | No answer  | 0     |            |
| 98    | Not asked  | 4601  | 98.1%      |

*Warning: these figures indicate the number of cases found in the data file. They cannot be interpreted as summary statistics of the population of interest.*

**# r7ocreasm4b1: To what extent should the Supreme Court's power in controversial issues be reduced?**

|                                   |                                                                                                                                                                                                                                 |
|-----------------------------------|---------------------------------------------------------------------------------------------------------------------------------------------------------------------------------------------------------------------------------|
| <b>Information</b>                | [Type= discrete] [Format=numeric] [Range= 0-50] [Missing=*]                                                                                                                                                                     |
| <b>Statistics [NW/ W]</b>         | [Valid=4689 /-] [Invalid=0 /-]                                                                                                                                                                                                  |
| <b>Literal question</b>           | In general, to what extent do you think the Norwegian Supreme Court's power to decide certain types of controversial issues should be reduced?                                                                                  |
| <b>Interviewer's instructions</b> | [Asked if u=2, ran20=2 AND R7OCRECSM_mobile2=0. Version for desktop and tablet users. Mobile users are asked R7OCRECSM4B1_mobile.]<br><br>[Slider is used to give answers. Departure position of the marker is set to value 1.] |
| <b>Notes</b>                      | Generelt sett, i hvilken grad mener du at Norges Høyesteretts makt til å avgjøre visse typer kontroversielle saker bør                                                                                                          |

| Value | Label      | Cases | Percentage |
|-------|------------|-------|------------|
| 0     | Not at all | 16    | 0.3%       |
| 1     | 1          | 76    | 1.6%       |
| 2     | 2          | 4     | 0.1%       |
| 3     | 3          | 4     | 0.1%       |
| 4     | 4          | 6     | 0.1%       |
| 5     | 5          | 5     | 0.1%       |
| 6     | 6          | 4     | 0.1%       |
| 7     | 7          | 8     | 0.2%       |
| 8     | 8          | 11    | 0.2%       |
| 9     | 9          | 5     | 0.1%       |
| 10    | 10         | 2     | 0.0%       |
| 11    | 11         | 8     | 0.2%       |
| 12    | 12         | 11    | 0.2%       |
| 13    | 13         | 4     | 0.1%       |
| 14    | 14         | 7     | 0.1%       |

| # r7ocreasm4b1: To what extent should the Supreme Court's power in controversial issues be reduced?                                                         |                                                                                                                                                |       |            |
|-------------------------------------------------------------------------------------------------------------------------------------------------------------|------------------------------------------------------------------------------------------------------------------------------------------------|-------|------------|
| Value                                                                                                                                                       | Label                                                                                                                                          | Cases | Percentage |
| 15                                                                                                                                                          | 15                                                                                                                                             | 6     | 0.1%       |
| 16                                                                                                                                                          | 16                                                                                                                                             | 4     | 0.1%       |
| 17                                                                                                                                                          | 17                                                                                                                                             | 2     | 0.0%       |
| 18                                                                                                                                                          | 18                                                                                                                                             | 5     | 0.1%       |
| 19                                                                                                                                                          | 19                                                                                                                                             | 3     | 0.1%       |
| 20                                                                                                                                                          | 20                                                                                                                                             | 3     | 0.1%       |
| 21                                                                                                                                                          | 21                                                                                                                                             | 4     | 0.1%       |
| 22                                                                                                                                                          | 22                                                                                                                                             | 2     | 0.0%       |
| 23                                                                                                                                                          | 23                                                                                                                                             | 4     | 0.1%       |
| 24                                                                                                                                                          | 24                                                                                                                                             | 21    | 0.4%       |
| 25                                                                                                                                                          | 25                                                                                                                                             | 38    | 0.8%       |
| 26                                                                                                                                                          | 26                                                                                                                                             | 9     | 0.2%       |
| 27                                                                                                                                                          | 27                                                                                                                                             | 3     | 0.1%       |
| 28                                                                                                                                                          | 28                                                                                                                                             | 5     | 0.1%       |
| 29                                                                                                                                                          | 29                                                                                                                                             | 0     |            |
| 30                                                                                                                                                          | 30                                                                                                                                             | 3     | 0.1%       |
| 31                                                                                                                                                          | 31                                                                                                                                             | 0     |            |
| 32                                                                                                                                                          | 32                                                                                                                                             | 0     |            |
| 33                                                                                                                                                          | 33                                                                                                                                             | 4     | 0.1%       |
| 34                                                                                                                                                          | 34                                                                                                                                             | 0     |            |
| 35                                                                                                                                                          | 35                                                                                                                                             | 2     | 0.0%       |
| 36                                                                                                                                                          | 36                                                                                                                                             | 1     | 0.0%       |
| 37                                                                                                                                                          | 37                                                                                                                                             | 2     | 0.0%       |
| 38                                                                                                                                                          | 38                                                                                                                                             | 0     |            |
| 39                                                                                                                                                          | 39                                                                                                                                             | 1     | 0.0%       |
| 40                                                                                                                                                          | 40                                                                                                                                             | 0     |            |
| 41                                                                                                                                                          | 41                                                                                                                                             | 1     | 0.0%       |
| 42                                                                                                                                                          | 42                                                                                                                                             | 0     |            |
| 43                                                                                                                                                          | 43                                                                                                                                             | 1     | 0.0%       |
| 44                                                                                                                                                          | 44                                                                                                                                             | 0     |            |
| 45                                                                                                                                                          | 45                                                                                                                                             | 0     |            |
| 46                                                                                                                                                          | 46                                                                                                                                             | 0     |            |
| 47                                                                                                                                                          | 47                                                                                                                                             | 0     |            |
| 48                                                                                                                                                          | 48                                                                                                                                             | 0     |            |
| 49                                                                                                                                                          | 49                                                                                                                                             | 0     |            |
| 50                                                                                                                                                          | Completely                                                                                                                                     | 1     | 0.0%       |
| 97                                                                                                                                                          | No answer                                                                                                                                      | 0     |            |
| 98                                                                                                                                                          | Not asked                                                                                                                                      | 4393  | 93.7%      |
| Warning: these figures indicate the number of cases found in the data file. They cannot be interpreted as summary statistics of the population of interest. |                                                                                                                                                |       |            |
| # r7ocreasm4b1_mobile: To what extent should the Supreme Court's power in controversial issues be reduced?                                                  |                                                                                                                                                |       |            |
| Information                                                                                                                                                 | [Type= discrete] [Format=numeric] [Range= 0-50] [Missing=*]                                                                                    |       |            |
| Statistics [NW/ W]                                                                                                                                          | [Valid=4689 /-] [Invalid=0 /-]                                                                                                                 |       |            |
| Literal question                                                                                                                                            | In general, to what extent do you think the Norwegian Supreme Court's power to decide certain types of controversial issues should be reduced? |       |            |

| # r7ocreasm4b1_mobile: To what extent should the Supreme Court's power in controversial issues be reduced? |            |                                                                                                                                                                                                                                    |            |
|------------------------------------------------------------------------------------------------------------|------------|------------------------------------------------------------------------------------------------------------------------------------------------------------------------------------------------------------------------------------|------------|
| <b>Interviewer's instructions</b>                                                                          |            | [Asked if u=2, ran20=2 AND R7OCRECSM_mobile2=1. Version for mobile users due to layout. Desktop/tablet users are asked R7OCRECSM4B1.]<br><br>[Slider is used to give answers. Departure position of the marker is set to value 1.] |            |
| <b>Notes</b>                                                                                               |            | Generelt sett, i hvilken grad mener du at Norges Høyesteretts makt til å avgjøre visse typer kontroversielle saker bør                                                                                                             |            |
| Value                                                                                                      | Label      | Cases                                                                                                                                                                                                                              | Percentage |
| 0                                                                                                          | Not at all | 1                                                                                                                                                                                                                                  | 0.0%       |
| 1                                                                                                          | 1          | 47                                                                                                                                                                                                                                 | 1.0%       |
| 2                                                                                                          | 2          | 0                                                                                                                                                                                                                                  |            |
| 3                                                                                                          | 3          | 1                                                                                                                                                                                                                                  | 0.0%       |
| 4                                                                                                          | 4          | 0                                                                                                                                                                                                                                  |            |
| 5                                                                                                          | 5          | 3                                                                                                                                                                                                                                  | 0.1%       |
| 6                                                                                                          | 6          | 1                                                                                                                                                                                                                                  | 0.0%       |
| 7                                                                                                          | 7          | 1                                                                                                                                                                                                                                  | 0.0%       |
| 8                                                                                                          | 8          | 1                                                                                                                                                                                                                                  | 0.0%       |
| 9                                                                                                          | 9          | 2                                                                                                                                                                                                                                  | 0.0%       |
| 10                                                                                                         | 10         | 2                                                                                                                                                                                                                                  | 0.0%       |
| 11                                                                                                         | 11         | 1                                                                                                                                                                                                                                  | 0.0%       |
| 12                                                                                                         | 12         | 1                                                                                                                                                                                                                                  | 0.0%       |
| 13                                                                                                         | 13         | 2                                                                                                                                                                                                                                  | 0.0%       |
| 14                                                                                                         | 14         | 1                                                                                                                                                                                                                                  | 0.0%       |
| 15                                                                                                         | 15         | 0                                                                                                                                                                                                                                  |            |
| 16                                                                                                         | 16         | 1                                                                                                                                                                                                                                  | 0.0%       |
| 17                                                                                                         | 17         | 2                                                                                                                                                                                                                                  | 0.0%       |
| 18                                                                                                         | 18         | 0                                                                                                                                                                                                                                  |            |
| 19                                                                                                         | 19         | 1                                                                                                                                                                                                                                  | 0.0%       |
| 20                                                                                                         | 20         | 2                                                                                                                                                                                                                                  | 0.0%       |
| 21                                                                                                         | 21         | 3                                                                                                                                                                                                                                  | 0.1%       |
| 22                                                                                                         | 22         | 2                                                                                                                                                                                                                                  | 0.0%       |
| 23                                                                                                         | 23         | 1                                                                                                                                                                                                                                  | 0.0%       |
| 24                                                                                                         | 24         | 1                                                                                                                                                                                                                                  | 0.0%       |
| 25                                                                                                         | 25         | 1                                                                                                                                                                                                                                  | 0.0%       |
| 26                                                                                                         | 26         | 0                                                                                                                                                                                                                                  |            |
| 27                                                                                                         | 27         | 0                                                                                                                                                                                                                                  |            |
| 28                                                                                                         | 28         | 2                                                                                                                                                                                                                                  | 0.0%       |
| 29                                                                                                         | 29         | 1                                                                                                                                                                                                                                  | 0.0%       |
| 30                                                                                                         | 30         | 9                                                                                                                                                                                                                                  | 0.2%       |
| 31                                                                                                         | 31         | 3                                                                                                                                                                                                                                  | 0.1%       |
| 32                                                                                                         | 32         | 1                                                                                                                                                                                                                                  | 0.0%       |
| 33                                                                                                         | 33         | 2                                                                                                                                                                                                                                  | 0.0%       |
| 34                                                                                                         | 34         | 1                                                                                                                                                                                                                                  | 0.0%       |
| 35                                                                                                         | 35         | 1                                                                                                                                                                                                                                  | 0.0%       |
| 36                                                                                                         | 36         | 3                                                                                                                                                                                                                                  | 0.1%       |
| 37                                                                                                         | 37         | 1                                                                                                                                                                                                                                  | 0.0%       |
| 38                                                                                                         | 38         | 2                                                                                                                                                                                                                                  | 0.0%       |
| 39                                                                                                         | 39         | 0                                                                                                                                                                                                                                  |            |



| # r7ocreasm4b1_mobile: To what extent should the Supreme Court's power in controversial issues be reduced?                                                  |                                                                                                                                                                                                                                 |       |            |
|-------------------------------------------------------------------------------------------------------------------------------------------------------------|---------------------------------------------------------------------------------------------------------------------------------------------------------------------------------------------------------------------------------|-------|------------|
| Value                                                                                                                                                       | Label                                                                                                                                                                                                                           | Cases | Percentage |
| 40                                                                                                                                                          | 40                                                                                                                                                                                                                              | 1     | 0.0%       |
| 41                                                                                                                                                          | 41                                                                                                                                                                                                                              | 1     | 0.0%       |
| 42                                                                                                                                                          | 42                                                                                                                                                                                                                              | 2     | 0.0%       |
| 43                                                                                                                                                          | 43                                                                                                                                                                                                                              | 1     | 0.0%       |
| 44                                                                                                                                                          | 44                                                                                                                                                                                                                              | 0     |            |
| 45                                                                                                                                                          | 45                                                                                                                                                                                                                              | 0     |            |
| 46                                                                                                                                                          | 46                                                                                                                                                                                                                              | 0     |            |
| 47                                                                                                                                                          | 47                                                                                                                                                                                                                              | 0     |            |
| 48                                                                                                                                                          | 48                                                                                                                                                                                                                              | 0     |            |
| 49                                                                                                                                                          | 49                                                                                                                                                                                                                              | 0     |            |
| 50                                                                                                                                                          | Completely                                                                                                                                                                                                                      | 0     |            |
| 97                                                                                                                                                          | No answer                                                                                                                                                                                                                       | 0     |            |
| 98                                                                                                                                                          | Not asked                                                                                                                                                                                                                       | 4580  | 97.7%      |
| Warning: these figures indicate the number of cases found in the data file. They cannot be interpreted as summary statistics of the population of interest. |                                                                                                                                                                                                                                 |       |            |
| # r7ocreasm4b2: To what extent does the Supreme Court favor certain groups?                                                                                 |                                                                                                                                                                                                                                 |       |            |
| Information                                                                                                                                                 | [Type= discrete] [Format=numeric] [Range= 0-50] [Missing=*]                                                                                                                                                                     |       |            |
| Statistics [NW/ W]                                                                                                                                          | [Valid=4689 /-] [Invalid=0 /-]                                                                                                                                                                                                  |       |            |
| Literal question                                                                                                                                            | To what extent do you think the decisions of the Norwegian Supreme Court favor certain groups more than others?                                                                                                                 |       |            |
| Interviewer's instructions                                                                                                                                  | [Asked if u=2, ran20=2 AND R7OCRECSM_mobile2=0. Version for desktop and tablet users. Mobile users are asked R7OCRECSM4B2_mobile.]<br><br>[Slider is used to give answers. Departure position of the marker is set to value 1.] |       |            |
| Notes                                                                                                                                                       | I hvilken grad mener du at avgjørelsene til Norges Høyesterett favoriserer enkelte grupper mer enn andre? ^f('R7OCRECS                                                                                                          |       |            |
| Value                                                                                                                                                       | Label                                                                                                                                                                                                                           | Cases | Percentage |
| 0                                                                                                                                                           | Not at all                                                                                                                                                                                                                      | 6     | 0.1%       |
| 1                                                                                                                                                           | 1                                                                                                                                                                                                                               | 82    | 1.7%       |
| 2                                                                                                                                                           | 2                                                                                                                                                                                                                               | 1     | 0.0%       |
| 3                                                                                                                                                           | 3                                                                                                                                                                                                                               | 4     | 0.1%       |
| 4                                                                                                                                                           | 4                                                                                                                                                                                                                               | 3     | 0.1%       |
| 5                                                                                                                                                           | 5                                                                                                                                                                                                                               | 7     | 0.1%       |
| 6                                                                                                                                                           | 6                                                                                                                                                                                                                               | 4     | 0.1%       |
| 7                                                                                                                                                           | 7                                                                                                                                                                                                                               | 7     | 0.1%       |
| 8                                                                                                                                                           | 8                                                                                                                                                                                                                               | 6     | 0.1%       |
| 9                                                                                                                                                           | 9                                                                                                                                                                                                                               | 6     | 0.1%       |
| 10                                                                                                                                                          | 10                                                                                                                                                                                                                              | 9     | 0.2%       |
| 11                                                                                                                                                          | 11                                                                                                                                                                                                                              | 7     | 0.1%       |
| 12                                                                                                                                                          | 12                                                                                                                                                                                                                              | 5     | 0.1%       |
| 13                                                                                                                                                          | 13                                                                                                                                                                                                                              | 6     | 0.1%       |
| 14                                                                                                                                                          | 14                                                                                                                                                                                                                              | 2     | 0.0%       |
| 15                                                                                                                                                          | 15                                                                                                                                                                                                                              | 4     | 0.1%       |
| 16                                                                                                                                                          | 16                                                                                                                                                                                                                              | 1     | 0.0%       |
| 17                                                                                                                                                          | 17                                                                                                                                                                                                                              | 3     | 0.1%       |
| 18                                                                                                                                                          | 18                                                                                                                                                                                                                              | 4     | 0.1%       |
| 19                                                                                                                                                          | 19                                                                                                                                                                                                                              | 3     | 0.1%       |
| 20                                                                                                                                                          | 20                                                                                                                                                                                                                              | 3     | 0.1%       |

| # r7ocreasm4b2: To what extent does the Supreme Court favor certain groups?                                                                                 |                                                                                                                                                                                                                                    |       |            |
|-------------------------------------------------------------------------------------------------------------------------------------------------------------|------------------------------------------------------------------------------------------------------------------------------------------------------------------------------------------------------------------------------------|-------|------------|
| Value                                                                                                                                                       | Label                                                                                                                                                                                                                              | Cases | Percentage |
| 21                                                                                                                                                          | 21                                                                                                                                                                                                                                 | 6     | 0.1%       |
| 22                                                                                                                                                          | 22                                                                                                                                                                                                                                 | 3     | 0.1%       |
| 23                                                                                                                                                          | 23                                                                                                                                                                                                                                 | 3     | 0.1%       |
| 24                                                                                                                                                          | 24                                                                                                                                                                                                                                 | 16    | 0.3%       |
| 25                                                                                                                                                          | 25                                                                                                                                                                                                                                 | 40    | 0.9%       |
| 26                                                                                                                                                          | 26                                                                                                                                                                                                                                 | 8     | 0.2%       |
| 27                                                                                                                                                          | 27                                                                                                                                                                                                                                 | 8     | 0.2%       |
| 28                                                                                                                                                          | 28                                                                                                                                                                                                                                 | 5     | 0.1%       |
| 29                                                                                                                                                          | 29                                                                                                                                                                                                                                 | 7     | 0.1%       |
| 30                                                                                                                                                          | 30                                                                                                                                                                                                                                 | 3     | 0.1%       |
| 31                                                                                                                                                          | 31                                                                                                                                                                                                                                 | 7     | 0.1%       |
| 32                                                                                                                                                          | 32                                                                                                                                                                                                                                 | 2     | 0.0%       |
| 33                                                                                                                                                          | 33                                                                                                                                                                                                                                 | 4     | 0.1%       |
| 34                                                                                                                                                          | 34                                                                                                                                                                                                                                 | 3     | 0.1%       |
| 35                                                                                                                                                          | 35                                                                                                                                                                                                                                 | 0     |            |
| 36                                                                                                                                                          | 36                                                                                                                                                                                                                                 | 1     | 0.0%       |
| 37                                                                                                                                                          | 37                                                                                                                                                                                                                                 | 3     | 0.1%       |
| 38                                                                                                                                                          | 38                                                                                                                                                                                                                                 | 1     | 0.0%       |
| 39                                                                                                                                                          | 39                                                                                                                                                                                                                                 | 2     | 0.0%       |
| 40                                                                                                                                                          | 40                                                                                                                                                                                                                                 | 0     |            |
| 41                                                                                                                                                          | 41                                                                                                                                                                                                                                 | 0     |            |
| 42                                                                                                                                                          | 42                                                                                                                                                                                                                                 | 0     |            |
| 43                                                                                                                                                          | 43                                                                                                                                                                                                                                 | 0     |            |
| 44                                                                                                                                                          | 44                                                                                                                                                                                                                                 | 0     |            |
| 45                                                                                                                                                          | 45                                                                                                                                                                                                                                 | 0     |            |
| 46                                                                                                                                                          | 46                                                                                                                                                                                                                                 | 0     |            |
| 47                                                                                                                                                          | 47                                                                                                                                                                                                                                 | 0     |            |
| 48                                                                                                                                                          | 48                                                                                                                                                                                                                                 | 0     |            |
| 49                                                                                                                                                          | 49                                                                                                                                                                                                                                 | 0     |            |
| 50                                                                                                                                                          | Completely                                                                                                                                                                                                                         | 2     | 0.0%       |
| 97                                                                                                                                                          | No answer                                                                                                                                                                                                                          | 0     |            |
| 98                                                                                                                                                          | Not asked                                                                                                                                                                                                                          | 4392  | 93.7%      |
| Warning: these figures indicate the number of cases found in the data file. They cannot be interpreted as summary statistics of the population of interest. |                                                                                                                                                                                                                                    |       |            |
| # r7ocreasm4b2_mobile: To what extent does the Supreme Court favor certain groups?                                                                          |                                                                                                                                                                                                                                    |       |            |
| Information                                                                                                                                                 | [Type= discrete] [Format=numeric] [Range= 0-50] [Missing=*]                                                                                                                                                                        |       |            |
| Statistics [NW/ W]                                                                                                                                          | [Valid=4689 /-] [Invalid=0 /-]                                                                                                                                                                                                     |       |            |
| Literal question                                                                                                                                            | To what extent do you think the decisions of the Norwegian Supreme Court favor certain groups more than others?                                                                                                                    |       |            |
| Interviewer's instructions                                                                                                                                  | [Asked if u=2, ran20=2 AND R7OCRECSM_mobile2=1. Version for mobile users due to layout. Desktop/tablet users are asked R7OCRECSM4B2.]<br><br>[Slider is used to give answers. Departure position of the marker is set to value 1.] |       |            |
| Notes                                                                                                                                                       | I hvilken grad mener du at avgjørelsene til Norges Høyesterett favoriserer enkelte grupper mer enn andre?                                                                                                                          |       |            |
| Value                                                                                                                                                       | Label                                                                                                                                                                                                                              | Cases | Percentage |
| 0                                                                                                                                                           | Not at all                                                                                                                                                                                                                         | 2     | 0.0%       |
| 1                                                                                                                                                           | 1                                                                                                                                                                                                                                  | 39    | 0.8%       |

# r7ocrecsm4b2\_mobile: To what extent does the Supreme Court favor certain groups?

| Value | Label | Cases | Percentage |
|-------|-------|-------|------------|
| 2     | 2     | 0     |            |
| 3     | 3     | 1     | 0.0%       |
| 4     | 4     | 0     |            |
| 5     | 5     | 0     |            |
| 6     | 6     | 2     | 0.0%       |
| 7     | 7     | 1     | 0.0%       |
| 8     | 8     | 2     | 0.0%       |
| 9     | 9     | 3     | 0.1%       |
| 10    | 10    | 0     |            |
| 11    | 11    | 2     | 0.0%       |
| 12    | 12    | 0     |            |
| 13    | 13    | 3     | 0.1%       |
| 14    | 14    | 2     | 0.0%       |
| 15    | 15    | 1     | 0.0%       |
| 16    | 16    | 0     |            |
| 17    | 17    | 1     | 0.0%       |
| 18    | 18    | 2     | 0.0%       |
| 19    | 19    | 2     | 0.0%       |
| 20    | 20    | 1     | 0.0%       |
| 21    | 21    | 2     | 0.0%       |
| 22    | 22    | 4     | 0.1%       |
| 23    | 23    | 0     |            |
| 24    | 24    | 2     | 0.0%       |
| 25    | 25    | 2     | 0.0%       |
| 26    | 26    | 4     | 0.1%       |
| 27    | 27    | 2     | 0.0%       |
| 28    | 28    | 2     | 0.0%       |
| 29    | 29    | 2     | 0.0%       |
| 30    | 30    | 4     | 0.1%       |
| 31    | 31    | 4     | 0.1%       |
| 32    | 32    | 2     | 0.0%       |
| 33    | 33    | 2     | 0.0%       |
| 34    | 34    | 1     | 0.0%       |
| 35    | 35    | 1     | 0.0%       |
| 36    | 36    | 1     | 0.0%       |
| 37    | 37    | 0     |            |
| 38    | 38    | 1     | 0.0%       |
| 39    | 39    | 1     | 0.0%       |
| 40    | 40    | 0     |            |
| 41    | 41    | 1     | 0.0%       |
| 42    | 42    | 1     | 0.0%       |
| 43    | 43    | 0     |            |
| 44    | 44    | 1     | 0.0%       |
| 45    | 45    | 0     |            |
| 46    | 46    | 0     |            |

| # r7ocreasm4b2_mobile: To what extent does the Supreme Court favor certain groups?                                                                          |                                                                                                                                                                                                                                 |       |            |
|-------------------------------------------------------------------------------------------------------------------------------------------------------------|---------------------------------------------------------------------------------------------------------------------------------------------------------------------------------------------------------------------------------|-------|------------|
| Value                                                                                                                                                       | Label                                                                                                                                                                                                                           | Cases | Percentage |
| 47                                                                                                                                                          | 47                                                                                                                                                                                                                              | 2     | 0.0%       |
| 48                                                                                                                                                          | 48                                                                                                                                                                                                                              | 1     | 0.0%       |
| 49                                                                                                                                                          | 49                                                                                                                                                                                                                              | 0     |            |
| 50                                                                                                                                                          | Completely                                                                                                                                                                                                                      | 2     | 0.0%       |
| 97                                                                                                                                                          | No answer                                                                                                                                                                                                                       | 0     |            |
| 98                                                                                                                                                          | Not asked                                                                                                                                                                                                                       | 4580  | 97.7%      |
| Warning: these figures indicate the number of cases found in the data file. They cannot be interpreted as summary statistics of the population of interest. |                                                                                                                                                                                                                                 |       |            |
| # r7ocreasm4b3: To what extent could the Supreme Court be dissolved, if it makes several decisions most people disagree with?                               |                                                                                                                                                                                                                                 |       |            |
| Information                                                                                                                                                 | [Type= discrete] [Format=numeric] [Range= 0-50] [Missing=*]                                                                                                                                                                     |       |            |
| Statistics [NW/ W]                                                                                                                                          | [Valid=4689 /-] [Invalid=0 /-]                                                                                                                                                                                                  |       |            |
| Literal question                                                                                                                                            | And to what extent do you think that If the Norwegian Supreme Court starts to make several decisions that most people disagree with, the institution might just as well be dissolved?                                           |       |            |
| Interviewer's instructions                                                                                                                                  | [Asked if u=2, ran20=2 AND R7OCRECSM_mobile2=0. Version for desktop and tablet users. Mobile users are asked R7OCRECSM4B3_mobile.]<br><br>[Slider is used to give answers. Departure position of the marker is set to value 1.] |       |            |
| Notes                                                                                                                                                       | Og i hvilken grad mener du at dersom Norges Høyesterett begynner å ta mange avgjørelser som folk flest er uenige i, ka                                                                                                          |       |            |
| Value                                                                                                                                                       | Label                                                                                                                                                                                                                           | Cases | Percentage |
| 0                                                                                                                                                           | Not at all                                                                                                                                                                                                                      | 19    | 0.4%       |
| 1                                                                                                                                                           | 1                                                                                                                                                                                                                               | 108   | 2.3%       |
| 2                                                                                                                                                           | 2                                                                                                                                                                                                                               | 2     | 0.0%       |
| 3                                                                                                                                                           | 3                                                                                                                                                                                                                               | 5     | 0.1%       |
| 4                                                                                                                                                           | 4                                                                                                                                                                                                                               | 7     | 0.1%       |
| 5                                                                                                                                                           | 5                                                                                                                                                                                                                               | 5     | 0.1%       |
| 6                                                                                                                                                           | 6                                                                                                                                                                                                                               | 3     | 0.1%       |
| 7                                                                                                                                                           | 7                                                                                                                                                                                                                               | 3     | 0.1%       |
| 8                                                                                                                                                           | 8                                                                                                                                                                                                                               | 2     | 0.0%       |
| 9                                                                                                                                                           | 9                                                                                                                                                                                                                               | 3     | 0.1%       |
| 10                                                                                                                                                          | 10                                                                                                                                                                                                                              | 3     | 0.1%       |
| 11                                                                                                                                                          | 11                                                                                                                                                                                                                              | 5     | 0.1%       |
| 12                                                                                                                                                          | 12                                                                                                                                                                                                                              | 3     | 0.1%       |
| 13                                                                                                                                                          | 13                                                                                                                                                                                                                              | 5     | 0.1%       |
| 14                                                                                                                                                          | 14                                                                                                                                                                                                                              | 4     | 0.1%       |
| 15                                                                                                                                                          | 15                                                                                                                                                                                                                              | 2     | 0.0%       |
| 16                                                                                                                                                          | 16                                                                                                                                                                                                                              | 1     | 0.0%       |
| 17                                                                                                                                                          | 17                                                                                                                                                                                                                              | 6     | 0.1%       |
| 18                                                                                                                                                          | 18                                                                                                                                                                                                                              | 4     | 0.1%       |
| 19                                                                                                                                                          | 19                                                                                                                                                                                                                              | 3     | 0.1%       |
| 20                                                                                                                                                          | 20                                                                                                                                                                                                                              | 5     | 0.1%       |
| 21                                                                                                                                                          | 21                                                                                                                                                                                                                              | 3     | 0.1%       |
| 22                                                                                                                                                          | 22                                                                                                                                                                                                                              | 4     | 0.1%       |
| 23                                                                                                                                                          | 23                                                                                                                                                                                                                              | 2     | 0.0%       |
| 24                                                                                                                                                          | 24                                                                                                                                                                                                                              | 15    | 0.3%       |
| 25                                                                                                                                                          | 25                                                                                                                                                                                                                              | 24    | 0.5%       |

**# r7ocreasm4b3: To what extent could the Supreme Court be dissolved, if it makes several decisions most people disagree with?**

| Value | Label      | Cases | Percentage |
|-------|------------|-------|------------|
| 26    | 26         | 5     | 0.1%       |
| 27    | 27         | 5     | 0.1%       |
| 28    | 28         | 3     | 0.1%       |
| 29    | 29         | 2     | 0.0%       |
| 30    | 30         | 4     | 0.1%       |
| 31    | 31         | 5     | 0.1%       |
| 32    | 32         | 3     | 0.1%       |
| 33    | 33         | 1     | 0.0%       |
| 34    | 34         | 3     | 0.1%       |
| 35    | 35         | 4     | 0.1%       |
| 36    | 36         | 4     | 0.1%       |
| 37    | 37         | 2     | 0.0%       |
| 38    | 38         | 1     | 0.0%       |
| 39    | 39         | 1     | 0.0%       |
| 40    | 40         | 0     |            |
| 41    | 41         | 1     | 0.0%       |
| 42    | 42         | 1     | 0.0%       |
| 43    | 43         | 0     |            |
| 44    | 44         | 2     | 0.0%       |
| 45    | 45         | 0     |            |
| 46    | 46         | 0     |            |
| 47    | 47         | 0     |            |
| 48    | 48         | 1     | 0.0%       |
| 49    | 49         | 1     | 0.0%       |
| 50    | Completely | 2     | 0.0%       |
| 97    | No answer  | 0     |            |
| 98    | Not asked  | 4392  | 93.7%      |

*Warning: these figures indicate the number of cases found in the data file. They cannot be interpreted as summary statistics of the population of interest.*

**# r7ocreasm4b3\_mobile: To what extent could the Supreme Court be dissolved, if it makes several decisions most people disagree with?**

| <b>Information</b>                | [Type= discrete] [Format=numeric] [Range= 0-50] [Missing=*]                                                                                                                                                                        |       |            |
|-----------------------------------|------------------------------------------------------------------------------------------------------------------------------------------------------------------------------------------------------------------------------------|-------|------------|
| <b>Statistics [NW/ W]</b>         | [Valid=4689 /-] [Invalid=0 /-]                                                                                                                                                                                                     |       |            |
| <b>Literal question</b>           | And to what extent do you think that If the Norwegian Supreme Court starts to make several decisions that most people disagree with, the institution might just as well be dissolved?                                              |       |            |
| <b>Interviewer's instructions</b> | [Asked if u=2, ran20=2 AND R7OCRECSM_mobile2=1. Version for mobile users due to layout. Desktop/tablet users are asked R7OCRECSM4B3.]<br><br>[Slider is used to give answers. Departure position of the marker is set to value 1.] |       |            |
| <b>Notes</b>                      | Og i hvilken grad mener du at dersom Norges Høyesterett begynner å ta mange avgjørelser som folk flest er uenige i, ka                                                                                                             |       |            |
| Value                             | Label                                                                                                                                                                                                                              | Cases | Percentage |
| 0                                 | Not at all                                                                                                                                                                                                                         | 7     | 0.1%       |
| 1                                 | 1                                                                                                                                                                                                                                  | 41    | 0.9%       |
| 2                                 | 2                                                                                                                                                                                                                                  | 0     |            |
| 3                                 | 3                                                                                                                                                                                                                                  | 1     | 0.0%       |

# r7ocrecsm4b3\_mobile: To what extent could the Supreme Court be dissolved, if it makes several decisions most people disagree with?

| Value | Label | Cases | Percentage |
|-------|-------|-------|------------|
| 4     | 4     | 1     | 0.0%       |
| 5     | 5     | 1     | 0.0%       |
| 6     | 6     | 1     | 0.0%       |
| 7     | 7     | 1     | 0.0%       |
| 8     | 8     | 1     | 0.0%       |
| 9     | 9     | 4     | 0.1%       |
| 10    | 10    | 6     | 0.1%       |
| 11    | 11    | 0     |            |
| 12    | 12    | 1     | 0.0%       |
| 13    | 13    | 2     | 0.0%       |
| 14    | 14    | 4     | 0.1%       |
| 15    | 15    | 1     | 0.0%       |
| 16    | 16    | 0     |            |
| 17    | 17    | 1     | 0.0%       |
| 18    | 18    | 1     | 0.0%       |
| 19    | 19    | 2     | 0.0%       |
| 20    | 20    | 2     | 0.0%       |
| 21    | 21    | 5     | 0.1%       |
| 22    | 22    | 1     | 0.0%       |
| 23    | 23    | 2     | 0.0%       |
| 24    | 24    | 1     | 0.0%       |
| 25    | 25    | 2     | 0.0%       |
| 26    | 26    | 2     | 0.0%       |
| 27    | 27    | 0     |            |
| 28    | 28    | 2     | 0.0%       |
| 29    | 29    | 2     | 0.0%       |
| 30    | 30    | 2     | 0.0%       |
| 31    | 31    | 1     | 0.0%       |
| 32    | 32    | 1     | 0.0%       |
| 33    | 33    | 0     |            |
| 34    | 34    | 1     | 0.0%       |
| 35    | 35    | 0     |            |
| 36    | 36    | 1     | 0.0%       |
| 37    | 37    | 1     | 0.0%       |
| 38    | 38    | 0     |            |
| 39    | 39    | 1     | 0.0%       |
| 40    | 40    | 0     |            |
| 41    | 41    | 0     |            |
| 42    | 42    | 0     |            |
| 43    | 43    | 1     | 0.0%       |
| 44    | 44    | 0     |            |
| 45    | 45    | 0     |            |
| 46    | 46    | 0     |            |
| 47    | 47    | 0     |            |

**# r7ocreasm4b3\_mobile: To what extent could the Supreme Court be dissolved, if it makes several decisions most people disagree with?**

| Value | Label      | Cases | Percentage |
|-------|------------|-------|------------|
| 48    | 48         | 0     |            |
| 49    | 49         | 1     | 0.0%       |
| 50    | Completely | 4     | 0.1%       |
| 97    | No answer  | 0     |            |
| 98    | Not asked  | 4580  | 97.7%      |

*Warning: these figures indicate the number of cases found in the data file. They cannot be interpreted as summary statistics of the population of interest.*

**# r7ocreasm4c1\_1: To what extent should the Supreme Court's power in controversial issues be reduced?**

|                                   |                                                                                                                                                |
|-----------------------------------|------------------------------------------------------------------------------------------------------------------------------------------------|
| <b>Information</b>                | [Type= discrete] [Format=numeric] [Range= 1-5] [Missing=*]                                                                                     |
| <b>Statistics [NW/ W]</b>         | [Valid=4689 /-] [Invalid=0 /-]                                                                                                                 |
| <b>Literal question</b>           | In general, to what extent do you think the Norwegian Supreme Court's power to decide certain types of controversial issues should be reduced? |
| <b>Interviewer's instructions</b> | [Asked if u=2 and ran20=3. ]                                                                                                                   |
| <b>Notes</b>                      | R7OCRECSM4C1_1 (Generelt sett, i hvilken grad mener du at Norges Høyesteretts makt til å avgjøre visse typer kontrover                         |

| Value | Label      | Cases | Percentage |
|-------|------------|-------|------------|
| 1     | Not at all | 154   | 3.3%       |
| 2     | 2          | 92    | 2.0%       |
| 3     | 3          | 116   | 2.5%       |
| 4     | 4          | 19    | 0.4%       |
| 5     | Completely | 6     | 0.1%       |
| 97    | No answer  | 30    | 0.6%       |
| 98    | Not asked  | 4272  | 91.1%      |

*Warning: these figures indicate the number of cases found in the data file. They cannot be interpreted as summary statistics of the population of interest.*

**# r7ocreasm4c2\_1: To what extent does the Supreme Court favor certain groups?**

|                                   |                                                                                                                         |
|-----------------------------------|-------------------------------------------------------------------------------------------------------------------------|
| <b>Information</b>                | [Type= discrete] [Format=numeric] [Range= 1-5] [Missing=*]                                                              |
| <b>Statistics [NW/ W]</b>         | [Valid=4689 /-] [Invalid=0 /-]                                                                                          |
| <b>Literal question</b>           | To what extent do you think the decisions of the Norwegian Supreme Court favor certain groups more than others?         |
| <b>Interviewer's instructions</b> | [Asked if u=2 and ran20=3. ]                                                                                            |
| <b>Notes</b>                      | R7OCRECSM4C2_1 (I hvilken grad mener du at avgjørelsene til Norges Høyesterett favoriserer enkelte grupper mer enn andr |

| Value | Label      | Cases | Percentage |
|-------|------------|-------|------------|
| 1     | Not at all | 124   | 2.6%       |
| 2     | 2          | 107   | 2.3%       |
| 3     | 3          | 104   | 2.2%       |
| 4     | 4          | 44    | 0.9%       |
| 5     | Completely | 2     | 0.0%       |
| 97    | No answer  | 36    | 0.8%       |
| 98    | Not asked  | 4272  | 91.1%      |

*Warning: these figures indicate the number of cases found in the data file. They cannot be interpreted as summary statistics of the population of interest.*

**# r7ocreasm4c3\_1: To what extent could the Supreme Court be dissolved, if it makes several decisions most people disagree with?**

|                           |                                                            |
|---------------------------|------------------------------------------------------------|
| <b>Information</b>        | [Type= discrete] [Format=numeric] [Range= 1-5] [Missing=*] |
| <b>Statistics [NW/ W]</b> | [Valid=4689 /-] [Invalid=0 /-]                             |

|                                                                                                                                                                    |                                                                                                                                                                                       |              |                   |
|--------------------------------------------------------------------------------------------------------------------------------------------------------------------|---------------------------------------------------------------------------------------------------------------------------------------------------------------------------------------|--------------|-------------------|
| <b># r7ocreasm4c3_1: To what extent could the Supreme Court be dissolved, if it makes several decisions most people disagree with?</b>                             |                                                                                                                                                                                       |              |                   |
| <b>Literal question</b>                                                                                                                                            | And to what extent do you think that If the Norwegian Supreme Court starts to make several decisions that most people disagree with, the institution might just as well be dissolved? |              |                   |
| <b>Interviewer's instructions</b>                                                                                                                                  | [Asked if u=2 and ran20=3. ]                                                                                                                                                          |              |                   |
| <b>Notes</b>                                                                                                                                                       | R7OCRECSM4C3_1 (Og i hvilken grad mener du at dersom Norges Høyesterett begynner å ta mange avgjørelser som folk flest                                                                |              |                   |
| <b>Value</b>                                                                                                                                                       | <b>Label</b>                                                                                                                                                                          | <b>Cases</b> | <b>Percentage</b> |
| 1                                                                                                                                                                  | Not at all                                                                                                                                                                            | 173          | 3.7%              |
| 2                                                                                                                                                                  | 2                                                                                                                                                                                     | 86           | 1.8%              |
| 3                                                                                                                                                                  | 3                                                                                                                                                                                     | 84           | 1.8%              |
| 4                                                                                                                                                                  | 4                                                                                                                                                                                     | 34           | 0.7%              |
| 5                                                                                                                                                                  | Completely                                                                                                                                                                            | 7            | 0.1%              |
| 97                                                                                                                                                                 | No answer                                                                                                                                                                             | 33           | 0.7%              |
| 98                                                                                                                                                                 | Not asked                                                                                                                                                                             | 4272         | 91.1%             |
| <i>Warning: these figures indicate the number of cases found in the data file. They cannot be interpreted as summary statistics of the population of interest.</i> |                                                                                                                                                                                       |              |                   |
| <b># r7ran37: [Randomizes if u=1 OR u=4. ]</b>                                                                                                                     |                                                                                                                                                                                       |              |                   |
| <b>Information</b>                                                                                                                                                 | [Type= discrete] [Format=numeric] [Range= 1-2] [Missing=*]                                                                                                                            |              |                   |
| <b>Statistics [NW/ W]</b>                                                                                                                                          | [Valid=2323 /-] [Invalid=2366 /-]                                                                                                                                                     |              |                   |
| <b>Interviewer's instructions</b>                                                                                                                                  | [Randomizes if u=1 OR u=4. ]                                                                                                                                                          |              |                   |
| <b>Value</b>                                                                                                                                                       | <b>Label</b>                                                                                                                                                                          | <b>Cases</b> | <b>Percentage</b> |
| 1                                                                                                                                                                  | 1                                                                                                                                                                                     | 1140         | 49.1%             |
| 2                                                                                                                                                                  | 2                                                                                                                                                                                     | 1183         | 50.9%             |
| Sysmiss                                                                                                                                                            |                                                                                                                                                                                       | 2366         |                   |
| <i>Warning: these figures indicate the number of cases found in the data file. They cannot be interpreted as summary statistics of the population of interest.</i> |                                                                                                                                                                                       |              |                   |
| <b># r7qreview2a_1: Satisfied with: Questions in this survey</b>                                                                                                   |                                                                                                                                                                                       |              |                   |
| <b>Information</b>                                                                                                                                                 | [Type= discrete] [Format=numeric] [Range= 1-5] [Missing=*]                                                                                                                            |              |                   |
| <b>Statistics [NW/ W]</b>                                                                                                                                          | [Valid=4689 /-] [Invalid=0 /-]                                                                                                                                                        |              |                   |
| <b>Pre-question</b>                                                                                                                                                | We are interested to know more about how you as a participant perceive our surveys. All in all, how satisfied are you with:                                                           |              |                   |
| <b>Literal question</b>                                                                                                                                            | The questions you have answered this far in this survey?                                                                                                                              |              |                   |
| <b>Interviewer's instructions</b>                                                                                                                                  | [Asked if u=1 OR u=4, and if ran37=1. ]                                                                                                                                               |              |                   |
| <b>Notes</b>                                                                                                                                                       | Spørsmålene du har svart på så langt i denne undersøkelsen? (Vi er interessert i å vite mer om hvordan du som delta                                                                   |              |                   |
| <b>Value</b>                                                                                                                                                       | <b>Label</b>                                                                                                                                                                          | <b>Cases</b> | <b>Percentage</b> |
| 1                                                                                                                                                                  | Very satisfied                                                                                                                                                                        | 82           | 1.7%              |
| 2                                                                                                                                                                  | Satisfied                                                                                                                                                                             | 637          | 13.6%             |
| 3                                                                                                                                                                  | Somewhat satisfied                                                                                                                                                                    | 366          | 7.8%              |
| 4                                                                                                                                                                  | Slightly satisfied                                                                                                                                                                    | 34           | 0.7%              |
| 5                                                                                                                                                                  | Not satisfied at all                                                                                                                                                                  | 8            | 0.2%              |
| 97                                                                                                                                                                 | No answer                                                                                                                                                                             | 47           | 1.0%              |
| 98                                                                                                                                                                 | Not asked                                                                                                                                                                             | 3515         | 75.0%             |
| <i>Warning: these figures indicate the number of cases found in the data file. They cannot be interpreted as summary statistics of the population of interest.</i> |                                                                                                                                                                                       |              |                   |
| <b># r7qreview2a_2: Satisfied with: Participant in the Norwegian Citizen Panel</b>                                                                                 |                                                                                                                                                                                       |              |                   |
| <b>Information</b>                                                                                                                                                 | [Type= discrete] [Format=numeric] [Range= 1-5] [Missing=*]                                                                                                                            |              |                   |
| <b>Statistics [NW/ W]</b>                                                                                                                                          | [Valid=4689 /-] [Invalid=0 /-]                                                                                                                                                        |              |                   |
| <b>Pre-question</b>                                                                                                                                                | We are interested to know more about how you as a participant perceive our surveys. All in all, how satisfied are you with:                                                           |              |                   |



| # r7qreview2a_2: Satisfied with: Participant in the Norwegian Citizen Panel                                                                                 |                      |                                                                                                                                                                                                                                                                                                                                                                                                                                                                                                                                                                                                                                                                                                                                                                                                                                 |                              |
|-------------------------------------------------------------------------------------------------------------------------------------------------------------|----------------------|---------------------------------------------------------------------------------------------------------------------------------------------------------------------------------------------------------------------------------------------------------------------------------------------------------------------------------------------------------------------------------------------------------------------------------------------------------------------------------------------------------------------------------------------------------------------------------------------------------------------------------------------------------------------------------------------------------------------------------------------------------------------------------------------------------------------------------|------------------------------|
| <b>Literal question</b>                                                                                                                                     |                      | Being a participant in the Norwegian Citizen Panel.                                                                                                                                                                                                                                                                                                                                                                                                                                                                                                                                                                                                                                                                                                                                                                             |                              |
| <b>Interviewer's instructions</b>                                                                                                                           |                      | [Asked if u=1 OR u=4, and if ran37=1. ]                                                                                                                                                                                                                                                                                                                                                                                                                                                                                                                                                                                                                                                                                                                                                                                         |                              |
| <b>Notes</b>                                                                                                                                                |                      | Å være deltaker i Norsk medborgerpanel. (Vi er interessert i å vite mer om hvordan du som deltaker oppfatter undersøk                                                                                                                                                                                                                                                                                                                                                                                                                                                                                                                                                                                                                                                                                                           |                              |
| Value                                                                                                                                                       | Label                | Cases                                                                                                                                                                                                                                                                                                                                                                                                                                                                                                                                                                                                                                                                                                                                                                                                                           | Percentage                   |
| 1                                                                                                                                                           | Very satisfied       | 159                                                                                                                                                                                                                                                                                                                                                                                                                                                                                                                                                                                                                                                                                                                                                                                                                             | <div><div></div></div> 3.4%  |
| 2                                                                                                                                                           | Satisfied            | 618                                                                                                                                                                                                                                                                                                                                                                                                                                                                                                                                                                                                                                                                                                                                                                                                                             | <div><div></div></div> 13.2% |
| 3                                                                                                                                                           | Somewhat satisfied   | 292                                                                                                                                                                                                                                                                                                                                                                                                                                                                                                                                                                                                                                                                                                                                                                                                                             | <div><div></div></div> 6.2%  |
| 4                                                                                                                                                           | Slightly satisfied   | 45                                                                                                                                                                                                                                                                                                                                                                                                                                                                                                                                                                                                                                                                                                                                                                                                                              | <div><div></div></div> 1.0%  |
| 5                                                                                                                                                           | Not satisfied at all | 9                                                                                                                                                                                                                                                                                                                                                                                                                                                                                                                                                                                                                                                                                                                                                                                                                               | <div><div></div></div> 0.2%  |
| 97                                                                                                                                                          | No answer            | 51                                                                                                                                                                                                                                                                                                                                                                                                                                                                                                                                                                                                                                                                                                                                                                                                                              | <div><div></div></div> 1.1%  |
| 98                                                                                                                                                          | Not asked            | 3515                                                                                                                                                                                                                                                                                                                                                                                                                                                                                                                                                                                                                                                                                                                                                                                                                            | <div><div></div></div> 75.0% |
| Warning: these figures indicate the number of cases found in the data file. They cannot be interpreted as summary statistics of the population of interest. |                      |                                                                                                                                                                                                                                                                                                                                                                                                                                                                                                                                                                                                                                                                                                                                                                                                                                 |                              |
| # r7ran18: [Randomizes if u=1. ]                                                                                                                            |                      |                                                                                                                                                                                                                                                                                                                                                                                                                                                                                                                                                                                                                                                                                                                                                                                                                                 |                              |
| <b>Information</b>                                                                                                                                          |                      | [Type= discrete] [Format=numeric] [Range= 1-2] [Missing=*]                                                                                                                                                                                                                                                                                                                                                                                                                                                                                                                                                                                                                                                                                                                                                                      |                              |
| <b>Statistics [NW/ W]</b>                                                                                                                                   |                      | [Valid=1149 /-] [Invalid=3540 /-]                                                                                                                                                                                                                                                                                                                                                                                                                                                                                                                                                                                                                                                                                                                                                                                               |                              |
| <b>Interviewer's instructions</b>                                                                                                                           |                      | [Randomizes if u=1. ]                                                                                                                                                                                                                                                                                                                                                                                                                                                                                                                                                                                                                                                                                                                                                                                                           |                              |
| Value                                                                                                                                                       | Label                | Cases                                                                                                                                                                                                                                                                                                                                                                                                                                                                                                                                                                                                                                                                                                                                                                                                                           | Percentage                   |
| 1                                                                                                                                                           | 1                    | 591                                                                                                                                                                                                                                                                                                                                                                                                                                                                                                                                                                                                                                                                                                                                                                                                                             | <div><div></div></div> 51.4% |
| 2                                                                                                                                                           | 2                    | 558                                                                                                                                                                                                                                                                                                                                                                                                                                                                                                                                                                                                                                                                                                                                                                                                                             | <div><div></div></div> 48.6% |
| Sysmiss                                                                                                                                                     |                      | 3540                                                                                                                                                                                                                                                                                                                                                                                                                                                                                                                                                                                                                                                                                                                                                                                                                            |                              |
| Warning: these figures indicate the number of cases found in the data file. They cannot be interpreted as summary statistics of the population of interest. |                      |                                                                                                                                                                                                                                                                                                                                                                                                                                                                                                                                                                                                                                                                                                                                                                                                                                 |                              |
| # r7pad4a: Contribution to joint kitty: Random person excluded                                                                                              |                      |                                                                                                                                                                                                                                                                                                                                                                                                                                                                                                                                                                                                                                                                                                                                                                                                                                 |                              |
| <b>Information</b>                                                                                                                                          |                      | [Type= discrete] [Format=numeric] [Range= 1-11] [Missing=*]                                                                                                                                                                                                                                                                                                                                                                                                                                                                                                                                                                                                                                                                                                                                                                     |                              |
| <b>Statistics [NW/ W]</b>                                                                                                                                   |                      | [Valid=4689 /-] [Invalid=0 /-]                                                                                                                                                                                                                                                                                                                                                                                                                                                                                                                                                                                                                                                                                                                                                                                                  |                              |
| <b>Pre-question</b>                                                                                                                                         |                      | <p>We now ask you to make a decision whereby three persons will be selected to receive money. The following situation is the background for the decision you must make:</p> <p>Three participants of the Norwegian Citizens Panel are put together in a group. Every person in the group receives 1,000 kroner to begin with. Each person has to choose how much of his or her 1,000 kroner will be put into a joint kitty for the group. A person is drawn at random to be excluded from the group and is rewarded with 1,750 kroner. The two remaining people's contribution to the kitty is increased by 50 per cent and then divided equally between the two.</p> <p>The final cash prize paid to the participants selected to receive money will be the individuals share of the joint kitty and the money being kept.</p> |                              |
| <b>Literal question</b>                                                                                                                                     |                      | If you are one of the participants drawn out to win 1,000 kroner, how much would you put into the joint kitty?                                                                                                                                                                                                                                                                                                                                                                                                                                                                                                                                                                                                                                                                                                                  |                              |
| <b>Interviewer's instructions</b>                                                                                                                           |                      | [Asked if u=1 and ran18=1. ]                                                                                                                                                                                                                                                                                                                                                                                                                                                                                                                                                                                                                                                                                                                                                                                                    |                              |
| <b>Notes</b>                                                                                                                                                |                      | Vi ber deg nå om å ta en beslutning hvor tre personer vil trekkes ut til å motta penger. Følgende situasjon er bakgru                                                                                                                                                                                                                                                                                                                                                                                                                                                                                                                                                                                                                                                                                                           |                              |
| Value                                                                                                                                                       | Label                | Cases                                                                                                                                                                                                                                                                                                                                                                                                                                                                                                                                                                                                                                                                                                                                                                                                                           | Percentage                   |
| 1                                                                                                                                                           | 0                    | 42                                                                                                                                                                                                                                                                                                                                                                                                                                                                                                                                                                                                                                                                                                                                                                                                                              | <div><div></div></div> 0.9%  |
| 2                                                                                                                                                           | 100                  | 15                                                                                                                                                                                                                                                                                                                                                                                                                                                                                                                                                                                                                                                                                                                                                                                                                              | <div><div></div></div> 0.3%  |
| 3                                                                                                                                                           | 200                  | 33                                                                                                                                                                                                                                                                                                                                                                                                                                                                                                                                                                                                                                                                                                                                                                                                                              | <div><div></div></div> 0.7%  |
| 4                                                                                                                                                           | 300                  | 49                                                                                                                                                                                                                                                                                                                                                                                                                                                                                                                                                                                                                                                                                                                                                                                                                              | <div><div></div></div> 1.0%  |
| 5                                                                                                                                                           | 400                  | 22                                                                                                                                                                                                                                                                                                                                                                                                                                                                                                                                                                                                                                                                                                                                                                                                                              | <div><div></div></div> 0.5%  |
| 6                                                                                                                                                           | 500                  | 199                                                                                                                                                                                                                                                                                                                                                                                                                                                                                                                                                                                                                                                                                                                                                                                                                             | <div><div></div></div> 4.2%  |
| 7                                                                                                                                                           | 600                  | 17                                                                                                                                                                                                                                                                                                                                                                                                                                                                                                                                                                                                                                                                                                                                                                                                                              | <div><div></div></div> 0.4%  |
| 8                                                                                                                                                           | 700                  | 9                                                                                                                                                                                                                                                                                                                                                                                                                                                                                                                                                                                                                                                                                                                                                                                                                               | <div><div></div></div> 0.2%  |
| 9                                                                                                                                                           | 800                  | 9                                                                                                                                                                                                                                                                                                                                                                                                                                                                                                                                                                                                                                                                                                                                                                                                                               | <div><div></div></div> 0.2%  |

| # r7pad4a: Contribution to joint kitty: Random person excluded                                                                                              |                                                                                                                                                                                                                                                                                                                                                                                                                                                                                                                                                                                                                                                                                                                                                                                                                                                |       |            |
|-------------------------------------------------------------------------------------------------------------------------------------------------------------|------------------------------------------------------------------------------------------------------------------------------------------------------------------------------------------------------------------------------------------------------------------------------------------------------------------------------------------------------------------------------------------------------------------------------------------------------------------------------------------------------------------------------------------------------------------------------------------------------------------------------------------------------------------------------------------------------------------------------------------------------------------------------------------------------------------------------------------------|-------|------------|
| Value                                                                                                                                                       | Label                                                                                                                                                                                                                                                                                                                                                                                                                                                                                                                                                                                                                                                                                                                                                                                                                                          | Cases | Percentage |
| 10                                                                                                                                                          | 900                                                                                                                                                                                                                                                                                                                                                                                                                                                                                                                                                                                                                                                                                                                                                                                                                                            | 5     | 0.1%       |
| 11                                                                                                                                                          | 1000                                                                                                                                                                                                                                                                                                                                                                                                                                                                                                                                                                                                                                                                                                                                                                                                                                           | 157   | 3.3%       |
| 97                                                                                                                                                          | No answer                                                                                                                                                                                                                                                                                                                                                                                                                                                                                                                                                                                                                                                                                                                                                                                                                                      | 34    | 0.7%       |
| 98                                                                                                                                                          | Not asked                                                                                                                                                                                                                                                                                                                                                                                                                                                                                                                                                                                                                                                                                                                                                                                                                                      | 4098  | 87.4%      |
| Warning: these figures indicate the number of cases found in the data file. They cannot be interpreted as summary statistics of the population of interest. |                                                                                                                                                                                                                                                                                                                                                                                                                                                                                                                                                                                                                                                                                                                                                                                                                                                |       |            |
| # r7pad4b: Contribution to joint kitty: Person who contributes the least excluded                                                                           |                                                                                                                                                                                                                                                                                                                                                                                                                                                                                                                                                                                                                                                                                                                                                                                                                                                |       |            |
| Information                                                                                                                                                 | [Type= discrete] [Format=numeric] [Range= 1-11] [Missing=*]                                                                                                                                                                                                                                                                                                                                                                                                                                                                                                                                                                                                                                                                                                                                                                                    |       |            |
| Statistics [NW/ W]                                                                                                                                          | [Valid=4689 /-] [Invalid=0 /-]                                                                                                                                                                                                                                                                                                                                                                                                                                                                                                                                                                                                                                                                                                                                                                                                                 |       |            |
| Pre-question                                                                                                                                                | <p>We now ask you to make a decision whereby three persons will be selected to receive money. The following situation is the background for the decision you must make:</p> <p>Three participants of the Norwegian Citizens Panel are put together in a group. Every person in the group receives 1,000 kroner to begin with. Each person has to choose how much of his or her 1,000 kroner will be put into a joint kitty for the group. The person in the group who puts in the least is excluded from the group and is rewarded with 1,750 kroner. The two remaining people's contribution to the kitty is increased by 50 per cent and then divided equally between the two.</p> <p>The final cash prize paid to the participants selected to receive money will be the individuals share of the joint kitty and the money being kept.</p> |       |            |
| Literal question                                                                                                                                            | If you are one of the participants drawn out to win 1,000 kroner, how much would you put into the joint kitty?                                                                                                                                                                                                                                                                                                                                                                                                                                                                                                                                                                                                                                                                                                                                 |       |            |
| Interviewer's instructions                                                                                                                                  | [Asked if u=1 and ran18=2. ]                                                                                                                                                                                                                                                                                                                                                                                                                                                                                                                                                                                                                                                                                                                                                                                                                   |       |            |
| Notes                                                                                                                                                       | Vi ber deg nå om å ta en beslutning hvor tre personer vil trekkes ut til å motta penger. Følgende situasjon er bakgru                                                                                                                                                                                                                                                                                                                                                                                                                                                                                                                                                                                                                                                                                                                          |       |            |
| Value                                                                                                                                                       | Label                                                                                                                                                                                                                                                                                                                                                                                                                                                                                                                                                                                                                                                                                                                                                                                                                                          | Cases | Percentage |
| 1                                                                                                                                                           | 0                                                                                                                                                                                                                                                                                                                                                                                                                                                                                                                                                                                                                                                                                                                                                                                                                                              | 76    | 1.6%       |
| 2                                                                                                                                                           | 100                                                                                                                                                                                                                                                                                                                                                                                                                                                                                                                                                                                                                                                                                                                                                                                                                                            | 16    | 0.3%       |
| 3                                                                                                                                                           | 200                                                                                                                                                                                                                                                                                                                                                                                                                                                                                                                                                                                                                                                                                                                                                                                                                                            | 22    | 0.5%       |
| 4                                                                                                                                                           | 300                                                                                                                                                                                                                                                                                                                                                                                                                                                                                                                                                                                                                                                                                                                                                                                                                                            | 38    | 0.8%       |
| 5                                                                                                                                                           | 400                                                                                                                                                                                                                                                                                                                                                                                                                                                                                                                                                                                                                                                                                                                                                                                                                                            | 24    | 0.5%       |
| 6                                                                                                                                                           | 500                                                                                                                                                                                                                                                                                                                                                                                                                                                                                                                                                                                                                                                                                                                                                                                                                                            | 161   | 3.4%       |
| 7                                                                                                                                                           | 600                                                                                                                                                                                                                                                                                                                                                                                                                                                                                                                                                                                                                                                                                                                                                                                                                                            | 14    | 0.3%       |
| 8                                                                                                                                                           | 700                                                                                                                                                                                                                                                                                                                                                                                                                                                                                                                                                                                                                                                                                                                                                                                                                                            | 13    | 0.3%       |
| 9                                                                                                                                                           | 800                                                                                                                                                                                                                                                                                                                                                                                                                                                                                                                                                                                                                                                                                                                                                                                                                                            | 15    | 0.3%       |
| 10                                                                                                                                                          | 900                                                                                                                                                                                                                                                                                                                                                                                                                                                                                                                                                                                                                                                                                                                                                                                                                                            | 7     | 0.1%       |
| 11                                                                                                                                                          | 1000                                                                                                                                                                                                                                                                                                                                                                                                                                                                                                                                                                                                                                                                                                                                                                                                                                           | 145   | 3.1%       |
| 97                                                                                                                                                          | No answer                                                                                                                                                                                                                                                                                                                                                                                                                                                                                                                                                                                                                                                                                                                                                                                                                                      | 27    | 0.6%       |
| 98                                                                                                                                                          | Not asked                                                                                                                                                                                                                                                                                                                                                                                                                                                                                                                                                                                                                                                                                                                                                                                                                                      | 4131  | 88.1%      |
| Warning: these figures indicate the number of cases found in the data file. They cannot be interpreted as summary statistics of the population of interest. |                                                                                                                                                                                                                                                                                                                                                                                                                                                                                                                                                                                                                                                                                                                                                                                                                                                |       |            |
| # r7ran19: [Randomizes if u=4. ]                                                                                                                            |                                                                                                                                                                                                                                                                                                                                                                                                                                                                                                                                                                                                                                                                                                                                                                                                                                                |       |            |
| Information                                                                                                                                                 | [Type= discrete] [Format=numeric] [Range= 1-6] [Missing=*]                                                                                                                                                                                                                                                                                                                                                                                                                                                                                                                                                                                                                                                                                                                                                                                     |       |            |
| Statistics [NW/ W]                                                                                                                                          | [Valid=1173 /-] [Invalid=3516 /-]                                                                                                                                                                                                                                                                                                                                                                                                                                                                                                                                                                                                                                                                                                                                                                                                              |       |            |
| Interviewer's instructions                                                                                                                                  | [Randomizes if u=4. ]                                                                                                                                                                                                                                                                                                                                                                                                                                                                                                                                                                                                                                                                                                                                                                                                                          |       |            |
| Value                                                                                                                                                       | Label                                                                                                                                                                                                                                                                                                                                                                                                                                                                                                                                                                                                                                                                                                                                                                                                                                          | Cases | Percentage |
| 1                                                                                                                                                           | 1                                                                                                                                                                                                                                                                                                                                                                                                                                                                                                                                                                                                                                                                                                                                                                                                                                              | 213   | 18.2%      |
| 2                                                                                                                                                           | 2                                                                                                                                                                                                                                                                                                                                                                                                                                                                                                                                                                                                                                                                                                                                                                                                                                              | 206   | 17.6%      |
| 3                                                                                                                                                           | 3                                                                                                                                                                                                                                                                                                                                                                                                                                                                                                                                                                                                                                                                                                                                                                                                                                              | 180   | 15.3%      |
| 4                                                                                                                                                           | 4                                                                                                                                                                                                                                                                                                                                                                                                                                                                                                                                                                                                                                                                                                                                                                                                                                              | 198   | 16.9%      |
| 5                                                                                                                                                           | 5                                                                                                                                                                                                                                                                                                                                                                                                                                                                                                                                                                                                                                                                                                                                                                                                                                              | 198   | 16.9%      |
| 6                                                                                                                                                           | 6                                                                                                                                                                                                                                                                                                                                                                                                                                                                                                                                                                                                                                                                                                                                                                                                                                              | 178   | 15.2%      |

|                                                                                                                                                                    |                                                                                                                                                                                                                                                                                                                                                                                                                                                                                                                                                                                                                                |              |                   |
|--------------------------------------------------------------------------------------------------------------------------------------------------------------------|--------------------------------------------------------------------------------------------------------------------------------------------------------------------------------------------------------------------------------------------------------------------------------------------------------------------------------------------------------------------------------------------------------------------------------------------------------------------------------------------------------------------------------------------------------------------------------------------------------------------------------|--------------|-------------------|
| # r7ran19: [Randomizes if u=4. ]                                                                                                                                   |                                                                                                                                                                                                                                                                                                                                                                                                                                                                                                                                                                                                                                |              |                   |
| <b>Value</b>                                                                                                                                                       | <b>Label</b>                                                                                                                                                                                                                                                                                                                                                                                                                                                                                                                                                                                                                   | <b>Cases</b> | <b>Percentage</b> |
| Sysmiss                                                                                                                                                            |                                                                                                                                                                                                                                                                                                                                                                                                                                                                                                                                                                                                                                | 3516         |                   |
| <i>Warning: these figures indicate the number of cases found in the data file. They cannot be interpreted as summary statistics of the population of interest.</i> |                                                                                                                                                                                                                                                                                                                                                                                                                                                                                                                                                                                                                                |              |                   |
| # r7pad5a1_1: Choice between yellow/blue box                                                                                                                       |                                                                                                                                                                                                                                                                                                                                                                                                                                                                                                                                                                                                                                |              |                   |
| <b>Information</b>                                                                                                                                                 | [Type= discrete] [Format=numeric] [Range= 1-2] [Missing=*]                                                                                                                                                                                                                                                                                                                                                                                                                                                                                                                                                                     |              |                   |
| <b>Statistics [NW/ W]</b>                                                                                                                                          | [Valid=4689 /-] [Invalid=0 /-]                                                                                                                                                                                                                                                                                                                                                                                                                                                                                                                                                                                                 |              |                   |
| <b>Pre-question</b>                                                                                                                                                | <p>We would like to understand how people behave when facing financial choices. We therefore ask that you make an anonymous decision where you may be selected to receive money.<br/>You and another random person can choose between a yellow or blue box.</p> <p>If both choose the yellow box, you get 1,000 kroner each. If you choose the blue and the other the yellow, you receive 1,500 kroner and the other gets zero kroner. If both choose blue, you get 500 kroner each. Regardless of what the other person chooses, you earn most by choosing blue. We are selecting ten individuals who will receive money.</p> |              |                   |
| <b>Literal question</b>                                                                                                                                            | Please take a decision.                                                                                                                                                                                                                                                                                                                                                                                                                                                                                                                                                                                                        |              |                   |
| <b>Interviewer's instructions</b>                                                                                                                                  | [Asked if u=4 and ran19=1. ]                                                                                                                                                                                                                                                                                                                                                                                                                                                                                                                                                                                                   |              |                   |
| <b>Value</b>                                                                                                                                                       | <b>Label</b>                                                                                                                                                                                                                                                                                                                                                                                                                                                                                                                                                                                                                   | <b>Cases</b> | <b>Percentage</b> |
| 1                                                                                                                                                                  | Yellow box                                                                                                                                                                                                                                                                                                                                                                                                                                                                                                                                                                                                                     | 122          | 2.6%              |
| 2                                                                                                                                                                  | Blue box                                                                                                                                                                                                                                                                                                                                                                                                                                                                                                                                                                                                                       | 87           | 1.9%              |
| 97                                                                                                                                                                 | No answer                                                                                                                                                                                                                                                                                                                                                                                                                                                                                                                                                                                                                      | 4            | 0.1%              |
| 98                                                                                                                                                                 | Not asked                                                                                                                                                                                                                                                                                                                                                                                                                                                                                                                                                                                                                      | 4476         | 95.5%             |
| <i>Warning: these figures indicate the number of cases found in the data file. They cannot be interpreted as summary statistics of the population of interest.</i> |                                                                                                                                                                                                                                                                                                                                                                                                                                                                                                                                                                                                                                |              |                   |
| # r7pad5b1: Justify choice of yellow/blue box [anonymized]                                                                                                         |                                                                                                                                                                                                                                                                                                                                                                                                                                                                                                                                                                                                                                |              |                   |
| <b>Information</b>                                                                                                                                                 | [Type= discrete] [Format=character] [Missing=*]                                                                                                                                                                                                                                                                                                                                                                                                                                                                                                                                                                                |              |                   |
| <b>Statistics [NW/ W]</b>                                                                                                                                          | [Valid=4689 /-] [Invalid=0 /-]                                                                                                                                                                                                                                                                                                                                                                                                                                                                                                                                                                                                 |              |                   |
| <b>Pre-question</b>                                                                                                                                                | <p>We would like to understand how people behave when facing financial choices. We therefore ask that you make an anonymous decision where you may be selected to receive money.<br/>You and another random person can choose between a yellow or blue box.</p> <p>If both choose the yellow box, you get 1000 kroner each. If you choose the blue and the other the yellow, you receive 1,500 kroner and the other gets zero kroner. If both choose blue, you get 500 kroner each. Regardless of what the other person chooses, you earn most by choosing blue. We are selecting ten individuals who will receive money.</p>  |              |                   |
| <b>Literal question</b>                                                                                                                                            | We would like you to justify your choice before you take your decision.                                                                                                                                                                                                                                                                                                                                                                                                                                                                                                                                                        |              |                   |
| <b>Interviewer's instructions</b>                                                                                                                                  | <p>[Asked if u=4 and ran19=1. ]</p> <p>[Anonymized.]</p>                                                                                                                                                                                                                                                                                                                                                                                                                                                                                                                                                                       |              |                   |
| <b>Value</b>                                                                                                                                                       | <b>Label</b>                                                                                                                                                                                                                                                                                                                                                                                                                                                                                                                                                                                                                   | <b>Cases</b> | <b>Percentage</b> |
|                                                                                                                                                                    |                                                                                                                                                                                                                                                                                                                                                                                                                                                                                                                                                                                                                                | 4689         | 100.0%            |
| <i>Warning: these figures indicate the number of cases found in the data file. They cannot be interpreted as summary statistics of the population of interest.</i> |                                                                                                                                                                                                                                                                                                                                                                                                                                                                                                                                                                                                                                |              |                   |
| # r7pad5b2_1: Choice between yellow/blue box                                                                                                                       |                                                                                                                                                                                                                                                                                                                                                                                                                                                                                                                                                                                                                                |              |                   |
| <b>Information</b>                                                                                                                                                 | [Type= discrete] [Format=numeric] [Range= 1-2] [Missing=*]                                                                                                                                                                                                                                                                                                                                                                                                                                                                                                                                                                     |              |                   |
| <b>Statistics [NW/ W]</b>                                                                                                                                          | [Valid=4689 /-] [Invalid=0 /-]                                                                                                                                                                                                                                                                                                                                                                                                                                                                                                                                                                                                 |              |                   |
| <b>Literal question</b>                                                                                                                                            | Please take a decision:                                                                                                                                                                                                                                                                                                                                                                                                                                                                                                                                                                                                        |              |                   |
| <b>Interviewer's instructions</b>                                                                                                                                  | [Asked if u=4 and ran19=2. ]                                                                                                                                                                                                                                                                                                                                                                                                                                                                                                                                                                                                   |              |                   |
| <b>Value</b>                                                                                                                                                       | <b>Label</b>                                                                                                                                                                                                                                                                                                                                                                                                                                                                                                                                                                                                                   | <b>Cases</b> | <b>Percentage</b> |
| 1                                                                                                                                                                  | Yellow box                                                                                                                                                                                                                                                                                                                                                                                                                                                                                                                                                                                                                     | 124          | 2.6%              |
| 2                                                                                                                                                                  | Blue box                                                                                                                                                                                                                                                                                                                                                                                                                                                                                                                                                                                                                       | 73           | 1.6%              |
| 97                                                                                                                                                                 | No answer                                                                                                                                                                                                                                                                                                                                                                                                                                                                                                                                                                                                                      | 9            | 0.2%              |

| # r7pad5b2_1: Choice between yellow/blue box                                                                                                                |                                                                                                                                                                                                                                                                                                                                                                                                                                                                                                                                                                                                                               |       |                    |
|-------------------------------------------------------------------------------------------------------------------------------------------------------------|-------------------------------------------------------------------------------------------------------------------------------------------------------------------------------------------------------------------------------------------------------------------------------------------------------------------------------------------------------------------------------------------------------------------------------------------------------------------------------------------------------------------------------------------------------------------------------------------------------------------------------|-------|--------------------|
| Value                                                                                                                                                       | Label                                                                                                                                                                                                                                                                                                                                                                                                                                                                                                                                                                                                                         | Cases | Percentage         |
| 98                                                                                                                                                          | Not asked                                                                                                                                                                                                                                                                                                                                                                                                                                                                                                                                                                                                                     | 4483  | <div></div> 95.6%  |
| Warning: these figures indicate the number of cases found in the data file. They cannot be interpreted as summary statistics of the population of interest. |                                                                                                                                                                                                                                                                                                                                                                                                                                                                                                                                                                                                                               |       |                    |
| # r7pad5c1_1: Choice between yellow/blue box: The other person chose yellow                                                                                 |                                                                                                                                                                                                                                                                                                                                                                                                                                                                                                                                                                                                                               |       |                    |
| Information                                                                                                                                                 | [Type= discrete] [Format=numeric] [Range= 1-2] [Missing=*]                                                                                                                                                                                                                                                                                                                                                                                                                                                                                                                                                                    |       |                    |
| Statistics [NW/ W]                                                                                                                                          | [Valid=4689 /-] [Invalid=0 /-]                                                                                                                                                                                                                                                                                                                                                                                                                                                                                                                                                                                                |       |                    |
| Pre-question                                                                                                                                                | <p>We would like to understand how people behave when facing financial choices. We therefore ask that you make an anonymous decision where you may be selected to receive money.<br/>You and another random person can choose between a yellow or blue box.</p> <p>If both choose the yellow box, you get 1000 kroner each. If you choose the blue and the other the yellow, you receive 1,500 kroner and the other gets zero kroner. If both choose blue, you get 500 kroner each. Regardless of what the other person chooses, you earn most by choosing blue. We are selecting ten individuals who will receive money.</p> |       |                    |
| Literal question                                                                                                                                            | <p>The other person has chosen the yellow box.</p> <p>Please take a decision:</p>                                                                                                                                                                                                                                                                                                                                                                                                                                                                                                                                             |       |                    |
| Interviewer's instructions                                                                                                                                  | [Asked if u=4 and ran19=3. ]                                                                                                                                                                                                                                                                                                                                                                                                                                                                                                                                                                                                  |       |                    |
| Notes                                                                                                                                                       | R7PAD5C1_1 (Den andre personen har valgt den gule boksen. Vennligst ta en beslutning: )                                                                                                                                                                                                                                                                                                                                                                                                                                                                                                                                       |       |                    |
| Value                                                                                                                                                       | Label                                                                                                                                                                                                                                                                                                                                                                                                                                                                                                                                                                                                                         | Cases | Percentage         |
| 1                                                                                                                                                           | Yellow box                                                                                                                                                                                                                                                                                                                                                                                                                                                                                                                                                                                                                    | 105   | <div></div> 2.2%   |
| 2                                                                                                                                                           | Blue box                                                                                                                                                                                                                                                                                                                                                                                                                                                                                                                                                                                                                      | 69    | <div></div> 1.5%   |
| 97                                                                                                                                                          | No answer                                                                                                                                                                                                                                                                                                                                                                                                                                                                                                                                                                                                                     | 6     | <div></div> 0.1%   |
| 98                                                                                                                                                          | Not asked                                                                                                                                                                                                                                                                                                                                                                                                                                                                                                                                                                                                                     | 4509  | <div></div> 96.2%  |
| Warning: these figures indicate the number of cases found in the data file. They cannot be interpreted as summary statistics of the population of interest. |                                                                                                                                                                                                                                                                                                                                                                                                                                                                                                                                                                                                                               |       |                    |
| # r7pad5d1: Justify choice of yellow/blue box: The other person chose yellow [anonymized]                                                                   |                                                                                                                                                                                                                                                                                                                                                                                                                                                                                                                                                                                                                               |       |                    |
| Information                                                                                                                                                 | [Type= discrete] [Format=character] [Missing=*]                                                                                                                                                                                                                                                                                                                                                                                                                                                                                                                                                                               |       |                    |
| Statistics [NW/ W]                                                                                                                                          | [Valid=4689 /-] [Invalid=0 /-]                                                                                                                                                                                                                                                                                                                                                                                                                                                                                                                                                                                                |       |                    |
| Pre-question                                                                                                                                                | <p>We would like to understand how people behave when facing financial choices. We therefore ask that you make an anonymous decision where you may be selected to receive money.<br/>You and another random person can choose between a yellow or blue box.</p> <p>If both choose the yellow box, you get 1000 kroner each. If you choose the blue and the other the yellow, you receive 1,500 kroner and the other gets zero kroner. If both choose blue, you get 500 kroner each. Regardless of what the other person chooses, you earn most by choosing blue. We are selecting ten individuals who will receive money.</p> |       |                    |
| Literal question                                                                                                                                            | <p>The other person has chosen the yellow box.</p> <p>We would like you to justify your choice before you take your decision.</p>                                                                                                                                                                                                                                                                                                                                                                                                                                                                                             |       |                    |
| Interviewer's instructions                                                                                                                                  | <p>[Asked if u=4 and ran19=4. ]</p> <p>[Anonymized.]</p>                                                                                                                                                                                                                                                                                                                                                                                                                                                                                                                                                                      |       |                    |
| Notes                                                                                                                                                       | Den andre personen har valgt den gule boksen. Før du tar beslutningen ønsker vi at du begrunner valget ditt.                                                                                                                                                                                                                                                                                                                                                                                                                                                                                                                  |       |                    |
| Value                                                                                                                                                       | Label                                                                                                                                                                                                                                                                                                                                                                                                                                                                                                                                                                                                                         | Cases | Percentage         |
|                                                                                                                                                             |                                                                                                                                                                                                                                                                                                                                                                                                                                                                                                                                                                                                                               | 4689  | <div></div> 100.0% |
| Warning: these figures indicate the number of cases found in the data file. They cannot be interpreted as summary statistics of the population of interest. |                                                                                                                                                                                                                                                                                                                                                                                                                                                                                                                                                                                                                               |       |                    |
| # r7pad5d2_1: Choice between yellow/blue box: The other person chose yellow                                                                                 |                                                                                                                                                                                                                                                                                                                                                                                                                                                                                                                                                                                                                               |       |                    |
| Information                                                                                                                                                 | [Type= discrete] [Format=numeric] [Range= 1-2] [Missing=*]                                                                                                                                                                                                                                                                                                                                                                                                                                                                                                                                                                    |       |                    |
| Statistics [NW/ W]                                                                                                                                          | [Valid=4689 /-] [Invalid=0 /-]                                                                                                                                                                                                                                                                                                                                                                                                                                                                                                                                                                                                |       |                    |
| Literal question                                                                                                                                            | Please take a decision:                                                                                                                                                                                                                                                                                                                                                                                                                                                                                                                                                                                                       |       |                    |
| Interviewer's instructions                                                                                                                                  | [Asked if u=4 and ran19=4. ]                                                                                                                                                                                                                                                                                                                                                                                                                                                                                                                                                                                                  |       |                    |

| # r7pad5d2_1: Choice between yellow/blue box: The other person chose yellow                                                                                 |                                                                                                                                                                                                                                                                                                                                                                                                                                                                                                                                                                                                                            |       |            |
|-------------------------------------------------------------------------------------------------------------------------------------------------------------|----------------------------------------------------------------------------------------------------------------------------------------------------------------------------------------------------------------------------------------------------------------------------------------------------------------------------------------------------------------------------------------------------------------------------------------------------------------------------------------------------------------------------------------------------------------------------------------------------------------------------|-------|------------|
| Value                                                                                                                                                       | Label                                                                                                                                                                                                                                                                                                                                                                                                                                                                                                                                                                                                                      | Cases | Percentage |
| 1                                                                                                                                                           | Yellow box                                                                                                                                                                                                                                                                                                                                                                                                                                                                                                                                                                                                                 | 123   | 2.6%       |
| 2                                                                                                                                                           | Blue box                                                                                                                                                                                                                                                                                                                                                                                                                                                                                                                                                                                                                   | 66    | 1.4%       |
| 97                                                                                                                                                          | No answer                                                                                                                                                                                                                                                                                                                                                                                                                                                                                                                                                                                                                  | 9     | 0.2%       |
| 98                                                                                                                                                          | Not asked                                                                                                                                                                                                                                                                                                                                                                                                                                                                                                                                                                                                                  | 4491  | 95.8%      |
| Warning: these figures indicate the number of cases found in the data file. They cannot be interpreted as summary statistics of the population of interest. |                                                                                                                                                                                                                                                                                                                                                                                                                                                                                                                                                                                                                            |       |            |
| # r7pad5e1_1: Choice between yellow/blue box: The other person chose blue                                                                                   |                                                                                                                                                                                                                                                                                                                                                                                                                                                                                                                                                                                                                            |       |            |
| Information                                                                                                                                                 | [Type= discrete] [Format=numeric] [Range= 1-2] [Missing=*]                                                                                                                                                                                                                                                                                                                                                                                                                                                                                                                                                                 |       |            |
| Statistics [NW/ W]                                                                                                                                          | [Valid=4689 /-] [Invalid=0 /-]                                                                                                                                                                                                                                                                                                                                                                                                                                                                                                                                                                                             |       |            |
| Pre-question                                                                                                                                                | <p>We would like to understand how people behave when facing financial choices. We therefore ask that you make an anonymous decision where you may be selected to receive money. You and another random person can choose between a yellow or blue box.</p> <p>If both choose the yellow box, you get 1000 kroner each. If you choose the blue and the other the yellow, you receive 1,500 kroner and the other gets zero kroner. If both choose blue, you get 500 kroner each. Regardless of what the other person chooses, you earn most by choosing blue. We are selecting ten individuals who will receive money.</p>  |       |            |
| Literal question                                                                                                                                            | <p>The other person has chosen the blue box.</p> <p>Please take a decision:</p>                                                                                                                                                                                                                                                                                                                                                                                                                                                                                                                                            |       |            |
| Interviewer's instructions                                                                                                                                  | [Asked if u=4 and ran19=5. ]                                                                                                                                                                                                                                                                                                                                                                                                                                                                                                                                                                                               |       |            |
| Notes                                                                                                                                                       | R7PAD5E1_1 (Den andre personen har valgt den blå boksen. Vennligst ta en beslutning:)                                                                                                                                                                                                                                                                                                                                                                                                                                                                                                                                      |       |            |
| Value                                                                                                                                                       | Label                                                                                                                                                                                                                                                                                                                                                                                                                                                                                                                                                                                                                      | Cases | Percentage |
| 1                                                                                                                                                           | Yellow box                                                                                                                                                                                                                                                                                                                                                                                                                                                                                                                                                                                                                 | 74    | 1.6%       |
| 2                                                                                                                                                           | Blue box                                                                                                                                                                                                                                                                                                                                                                                                                                                                                                                                                                                                                   | 116   | 2.5%       |
| 97                                                                                                                                                          | No answer                                                                                                                                                                                                                                                                                                                                                                                                                                                                                                                                                                                                                  | 8     | 0.2%       |
| 98                                                                                                                                                          | Not asked                                                                                                                                                                                                                                                                                                                                                                                                                                                                                                                                                                                                                  | 4491  | 95.8%      |
| Warning: these figures indicate the number of cases found in the data file. They cannot be interpreted as summary statistics of the population of interest. |                                                                                                                                                                                                                                                                                                                                                                                                                                                                                                                                                                                                                            |       |            |
| # r7pad5f1: Justify choice of yellow/blue box: The other person chose blue [anonymized]                                                                     |                                                                                                                                                                                                                                                                                                                                                                                                                                                                                                                                                                                                                            |       |            |
| Information                                                                                                                                                 | [Type= discrete] [Format=character] [Missing=*]                                                                                                                                                                                                                                                                                                                                                                                                                                                                                                                                                                            |       |            |
| Statistics [NW/ W]                                                                                                                                          | [Valid=4689 /-] [Invalid=0 /-]                                                                                                                                                                                                                                                                                                                                                                                                                                                                                                                                                                                             |       |            |
| Pre-question                                                                                                                                                | <p>We would like to understand how people behave when facing financial choices. We therefore ask that you make an anonymous decision where you may be selected to receive money. You and another random person can choose between a yellow or blue box.</p> <p>If both choose the yellow box, you get 1,000 kroner each. If you choose the blue and the other the yellow, you receive 1,500 kroner and the other gets zero kroner. If both choose blue, you get 500 kroner each. Regardless of what the other person chooses, you earn most by choosing blue. We are selecting ten individuals who will receive money.</p> |       |            |
| Literal question                                                                                                                                            | <p>The other person has chosen the blue box.</p> <p>We would like you to justify your choice before you take your decision.</p>                                                                                                                                                                                                                                                                                                                                                                                                                                                                                            |       |            |
| Interviewer's instructions                                                                                                                                  | <p>[Asked if u=4 and ran19=6. ]</p> <p>[Anonymized.]</p>                                                                                                                                                                                                                                                                                                                                                                                                                                                                                                                                                                   |       |            |
| Notes                                                                                                                                                       | Den andre personen har valgt den blå boksen. Før du tar beslutningen ønsker vi at du begrunner valget ditt.                                                                                                                                                                                                                                                                                                                                                                                                                                                                                                                |       |            |
| Value                                                                                                                                                       | Label                                                                                                                                                                                                                                                                                                                                                                                                                                                                                                                                                                                                                      | Cases | Percentage |
|                                                                                                                                                             |                                                                                                                                                                                                                                                                                                                                                                                                                                                                                                                                                                                                                            | 4689  | 100.0%     |
| Warning: these figures indicate the number of cases found in the data file. They cannot be interpreted as summary statistics of the population of interest. |                                                                                                                                                                                                                                                                                                                                                                                                                                                                                                                                                                                                                            |       |            |

| # r7pad5f2_1: Choice between yellow/blue box: The other person chose blue                                                                                   |                                                                                                                             |       |            |
|-------------------------------------------------------------------------------------------------------------------------------------------------------------|-----------------------------------------------------------------------------------------------------------------------------|-------|------------|
| Information                                                                                                                                                 | [Type= discrete] [Format=numeric] [Range= 1-2] [Missing=*]                                                                  |       |            |
| Statistics [NW/ W]                                                                                                                                          | [Valid=4689 /-] [Invalid=0 /-]                                                                                              |       |            |
| Literal question                                                                                                                                            | Please take a decision:                                                                                                     |       |            |
| Interviewer's instructions                                                                                                                                  | [Asked if u=4 and ran19=6. ]                                                                                                |       |            |
| Value                                                                                                                                                       | Label                                                                                                                       | Cases | Percentage |
| 1                                                                                                                                                           | Yellow box                                                                                                                  | 70    | 1.5%       |
| 2                                                                                                                                                           | Blue box                                                                                                                    | 97    | 2.1%       |
| 97                                                                                                                                                          | No answer                                                                                                                   | 11    | 0.2%       |
| 98                                                                                                                                                          | Not asked                                                                                                                   | 4511  | 96.2%      |
| Warning: these figures indicate the number of cases found in the data file. They cannot be interpreted as summary statistics of the population of interest. |                                                                                                                             |       |            |
| # r7qreview1_1: Satisfied with: Questions in this survey                                                                                                    |                                                                                                                             |       |            |
| Information                                                                                                                                                 | [Type= discrete] [Format=numeric] [Range= 1-5] [Missing=*]                                                                  |       |            |
| Statistics [NW/ W]                                                                                                                                          | [Valid=4689 /-] [Invalid=0 /-]                                                                                              |       |            |
| Pre-question                                                                                                                                                | We are interested to know more about how you as a participant perceive our surveys. All in all, how satisfied are you with: |       |            |
| Literal question                                                                                                                                            | The questions you have answered this far in this survey?                                                                    |       |            |
| Interviewer's instructions                                                                                                                                  | [All respondents asked. ]                                                                                                   |       |            |
| Notes                                                                                                                                                       | Spørsmålene du har svart på så langt i denne undersøkelsen? (Vi er interessert i å vite mer om hvordan du som delta         |       |            |
| Value                                                                                                                                                       | Label                                                                                                                       | Cases | Percentage |
| 1                                                                                                                                                           | Very satisfied                                                                                                              | 311   | 6.6%       |
| 2                                                                                                                                                           | Satisfied                                                                                                                   | 2719  | 58.0%      |
| 3                                                                                                                                                           | Somewhat satisfied                                                                                                          | 1304  | 27.8%      |
| 4                                                                                                                                                           | Slightly satisfied                                                                                                          | 159   | 3.4%       |
| 5                                                                                                                                                           | Not satisfied at all                                                                                                        | 34    | 0.7%       |
| 97                                                                                                                                                          | No answer                                                                                                                   | 162   | 3.5%       |
| 98                                                                                                                                                          | Not asked                                                                                                                   | 0     |            |
| Warning: these figures indicate the number of cases found in the data file. They cannot be interpreted as summary statistics of the population of interest. |                                                                                                                             |       |            |
| # r7qreview1_2: Satisfied with: Participant in the Norwegian Citizen Panel                                                                                  |                                                                                                                             |       |            |
| Information                                                                                                                                                 | [Type= discrete] [Format=numeric] [Range= 1-5] [Missing=*]                                                                  |       |            |
| Statistics [NW/ W]                                                                                                                                          | [Valid=4689 /-] [Invalid=0 /-]                                                                                              |       |            |
| Pre-question                                                                                                                                                | We are interested to know more about how you as a participant perceive our surveys. All in all, how satisfied are you with: |       |            |
| Literal question                                                                                                                                            | Being a participant in the Norwegian Citizen Panel.                                                                         |       |            |
| Interviewer's instructions                                                                                                                                  | [All respondents asked. ]                                                                                                   |       |            |
| Notes                                                                                                                                                       | Å være deltaker i Norsk medborgerpanel. (Vi er interessert i å vite mer om hvordan du som deltaker oppfatter undersøk       |       |            |
| Value                                                                                                                                                       | Label                                                                                                                       | Cases | Percentage |
| 1                                                                                                                                                           | Very satisfied                                                                                                              | 664   | 14.2%      |
| 2                                                                                                                                                           | Satisfied                                                                                                                   | 2582  | 55.1%      |
| 3                                                                                                                                                           | Somewhat satisfied                                                                                                          | 1020  | 21.8%      |
| 4                                                                                                                                                           | Slightly satisfied                                                                                                          | 181   | 3.9%       |
| 5                                                                                                                                                           | Not satisfied at all                                                                                                        | 58    | 1.2%       |
| 97                                                                                                                                                          | No answer                                                                                                                   | 184   | 3.9%       |
| 98                                                                                                                                                          | Not asked                                                                                                                   | 0     |            |
| Warning: these figures indicate the number of cases found in the data file. They cannot be interpreted as summary statistics of the population of interest. |                                                                                                                             |       |            |

| # r7municipalSize: Size of municipality                                                                                                                     |                  |                                               |             |       |
|-------------------------------------------------------------------------------------------------------------------------------------------------------------|------------------|-----------------------------------------------|-------------|-------|
| <b>Information</b>                                                                                                                                          |                  | [Type= discrete] [Format=numeric] [Missing=*] |             |       |
| <b>Statistics [NW/ W]</b>                                                                                                                                   |                  | [Valid=4689 /-] [Invalid=0 /-]                |             |       |
| Value                                                                                                                                                       | Label            | Cases                                         | Percentage  |       |
| 1                                                                                                                                                           | <10 000          | 818                                           | <div></div> | 17.4% |
| 2                                                                                                                                                           | 10 001 - 20 000  | 670                                           | <div></div> | 14.3% |
| 3                                                                                                                                                           | 20 001 - 60 000  | 1198                                          | <div></div> | 25.5% |
| 4                                                                                                                                                           | 60 000+          | 2003                                          | <div></div> | 42.7% |
| Warning: these figures indicate the number of cases found in the data file. They cannot be interpreted as summary statistics of the population of interest. |                  |                                               |             |       |
| # r7P1: Gender                                                                                                                                              |                  |                                               |             |       |
| <b>Information</b>                                                                                                                                          |                  | [Type= discrete] [Format=numeric] [Missing=*] |             |       |
| <b>Statistics [NW/ W]</b>                                                                                                                                   |                  | [Valid=4689 /-] [Invalid=0 /-]                |             |       |
| Value                                                                                                                                                       | Label            | Cases                                         | Percentage  |       |
| 1                                                                                                                                                           | Male             | 2355                                          | <div></div> | 50.2% |
| 2                                                                                                                                                           | Female           | 2334                                          | <div></div> | 49.8% |
| Warning: these figures indicate the number of cases found in the data file. They cannot be interpreted as summary statistics of the population of interest. |                  |                                               |             |       |
| # r7P2: Region                                                                                                                                              |                  |                                               |             |       |
| <b>Information</b>                                                                                                                                          |                  | [Type= discrete] [Format=numeric] [Missing=*] |             |       |
| <b>Statistics [NW/ W]</b>                                                                                                                                   |                  | [Valid=4689 /-] [Invalid=0 /-]                |             |       |
| Value                                                                                                                                                       | Label            | Cases                                         | Percentage  |       |
| 1                                                                                                                                                           | Oslo/Akershus    | 1335                                          | <div></div> | 28.5% |
| 2                                                                                                                                                           | Østlandet        | 1133                                          | <div></div> | 24.2% |
| 3                                                                                                                                                           | Sørlandet        | 216                                           | <div></div> | 4.6%  |
| 4                                                                                                                                                           | Vestlandet       | 1235                                          | <div></div> | 26.3% |
| 5                                                                                                                                                           | Trøndelag        | 425                                           | <div></div> | 9.1%  |
| 6                                                                                                                                                           | Nord-Norge       | 345                                           | <div></div> | 7.4%  |
| Warning: these figures indicate the number of cases found in the data file. They cannot be interpreted as summary statistics of the population of interest. |                  |                                               |             |       |
| # r7P3: County                                                                                                                                              |                  |                                               |             |       |
| <b>Information</b>                                                                                                                                          |                  | [Type= discrete] [Format=numeric] [Missing=*] |             |       |
| <b>Statistics [NW/ W]</b>                                                                                                                                   |                  | [Valid=4689 /-] [Invalid=0 /-]                |             |       |
| Value                                                                                                                                                       | Label            | Cases                                         | Percentage  |       |
| 1                                                                                                                                                           | Akershus         | 582                                           | <div></div> | 12.4% |
| 2                                                                                                                                                           | Oslo             | 753                                           | <div></div> | 16.1% |
| 3                                                                                                                                                           | Østfold          | 240                                           | <div></div> | 5.1%  |
| 4                                                                                                                                                           | Vestfold         | 242                                           | <div></div> | 5.2%  |
| 5                                                                                                                                                           | Hedmark          | 131                                           | <div></div> | 2.8%  |
| 6                                                                                                                                                           | Oppland          | 137                                           | <div></div> | 2.9%  |
| 7                                                                                                                                                           | Buskerud         | 244                                           | <div></div> | 5.2%  |
| 8                                                                                                                                                           | Telemark         | 139                                           | <div></div> | 3.0%  |
| 9                                                                                                                                                           | Vest-Agder       | 141                                           | <div></div> | 3.0%  |
| 10                                                                                                                                                          | Aust-Agder       | 75                                            | <div></div> | 1.6%  |
| 11                                                                                                                                                          | Rogaland         | 409                                           | <div></div> | 8.7%  |
| 12                                                                                                                                                          | Hordaland        | 550                                           | <div></div> | 11.7% |
| 13                                                                                                                                                          | Sogn og Fjordane | 82                                            | <div></div> | 1.7%  |

| # r7P3: County                                                                                                                                              |                                                                                                                                                                                                     |       |             |       |
|-------------------------------------------------------------------------------------------------------------------------------------------------------------|-----------------------------------------------------------------------------------------------------------------------------------------------------------------------------------------------------|-------|-------------|-------|
| Value                                                                                                                                                       | Label                                                                                                                                                                                               | Cases | Percentage  |       |
| 14                                                                                                                                                          | Møre og Romsdal                                                                                                                                                                                     | 194   | <div></div> | 4.1%  |
| 15                                                                                                                                                          | Sør-Trøndelag                                                                                                                                                                                       | 333   | <div></div> | 7.1%  |
| 16                                                                                                                                                          | Nord-Trøndelag                                                                                                                                                                                      | 92    | <div></div> | 2.0%  |
| 17                                                                                                                                                          | Nordland                                                                                                                                                                                            | 185   | <div></div> | 3.9%  |
| 18                                                                                                                                                          | Troms                                                                                                                                                                                               | 117   | <div></div> | 2.5%  |
| 19                                                                                                                                                          | Finmark                                                                                                                                                                                             | 43    | <div></div> | 0.9%  |
| Warning: these figures indicate the number of cases found in the data file. They cannot be interpreted as summary statistics of the population of interest. |                                                                                                                                                                                                     |       |             |       |
| # r7P4_1: Highest level of completed education                                                                                                              |                                                                                                                                                                                                     |       |             |       |
| Information                                                                                                                                                 | [Type= discrete] [Format=numeric] [Missing=*]                                                                                                                                                       |       |             |       |
| Statistics [NW/ W]                                                                                                                                          | [Valid=4689 /-] [Invalid=0 /-]                                                                                                                                                                      |       |             |       |
| Value                                                                                                                                                       | Label                                                                                                                                                                                               | Cases | Percentage  |       |
| 1                                                                                                                                                           | No education/elementary school                                                                                                                                                                      | 428   | <div></div> | 9.1%  |
| 2                                                                                                                                                           | Upper secondary education                                                                                                                                                                           | 1378  | <div></div> | 29.4% |
| 3                                                                                                                                                           | University/university college                                                                                                                                                                       | 2695  | <div></div> | 57.5% |
| 97                                                                                                                                                          | No answer                                                                                                                                                                                           | 188   | <div></div> | 4.0%  |
| Warning: these figures indicate the number of cases found in the data file. They cannot be interpreted as summary statistics of the population of interest. |                                                                                                                                                                                                     |       |             |       |
| # r7P4_2: Highest level of completed education                                                                                                              |                                                                                                                                                                                                     |       |             |       |
| Information                                                                                                                                                 | [Type= discrete] [Format=numeric] [Missing=*]                                                                                                                                                       |       |             |       |
| Statistics [NW/ W]                                                                                                                                          | [Valid=4689 /-] [Invalid=0 /-]                                                                                                                                                                      |       |             |       |
| Value                                                                                                                                                       | Label                                                                                                                                                                                               | Cases | Percentage  |       |
| 1                                                                                                                                                           | No completed education                                                                                                                                                                              | 18    | <div></div> | 0.4%  |
| 2                                                                                                                                                           | Primary school (first part of compulsory education)                                                                                                                                                 | 32    | <div></div> | 0.7%  |
| 3                                                                                                                                                           | Elementary school (primary, 7 year elementary school, continuation school, secondary school)                                                                                                        | 378   | <div></div> | 8.1%  |
| 4                                                                                                                                                           | College certificate                                                                                                                                                                                 | 43    | <div></div> | 0.9%  |
| 5                                                                                                                                                           | Completed upper secondary education, general studies/preparatory education programme, one-year post admission                                                                                       | 597   | <div></div> | 12.7% |
| 6                                                                                                                                                           | Completed upper secondary education, vocational subjects/education programmes (qualifying examination, apprenticeship examination)                                                                  | 566   | <div></div> | 12.1% |
| 7                                                                                                                                                           | Pre-university/college course that does not give credits                                                                                                                                            | 52    | <div></div> | 1.1%  |
| 8                                                                                                                                                           | Diploma from addition to upper secondary education (vocational, technical college)                                                                                                                  | 163   | <div></div> | 3.5%  |
| 9                                                                                                                                                           | University/university college, less than three years, but at least 2 years (university college graduate 2 and 2½ year)                                                                              | 451   | <div></div> | 9.6%  |
| 10                                                                                                                                                          | Completed 3-4 year education from university college (Bachelor, teacher's college, nursing college, pre-school teacher, engineer, business economist, etc.)                                         | 948   | <div></div> | 20.2% |
| 11                                                                                                                                                          | Completed 3-4 year education from University (Bachelor)                                                                                                                                             | 301   | <div></div> | 6.4%  |
| 12                                                                                                                                                          | Completed 5-6 year education from university college (Master)                                                                                                                                       | 344   | <div></div> | 7.3%  |
| 13                                                                                                                                                          | Completed 5-6 year education from university (master, graduate), further professional education (theologist, psychologist, physician, veterinarian, engineer, architect, senior business economist) | 553   | <div></div> | 11.8% |
| 14                                                                                                                                                          | Research level (Ph.D.)                                                                                                                                                                              | 98    | <div></div> | 2.1%  |
| 15                                                                                                                                                          | None of these                                                                                                                                                                                       | 116   | <div></div> | 2.5%  |
| 97                                                                                                                                                          | No answer                                                                                                                                                                                           | 29    | <div></div> | 0.6%  |
| Warning: these figures indicate the number of cases found in the data file. They cannot be interpreted as summary statistics of the population of interest. |                                                                                                                                                                                                     |       |             |       |



| # r7P5_1: Age                                                                                                                                               |              |                                                 |                              |
|-------------------------------------------------------------------------------------------------------------------------------------------------------------|--------------|-------------------------------------------------|------------------------------|
| Information                                                                                                                                                 |              | [Type= discrete] [Format=numeric] [Missing=*]   |                              |
| Statistics [NW/ W]                                                                                                                                          |              | [Valid=4689 /-] [Invalid=0 /-]                  |                              |
| Value                                                                                                                                                       | Label        | Cases                                           | Percentage                   |
| 1                                                                                                                                                           | 18-25 years  | 273                                             | <div><div></div></div> 5.8%  |
| 2                                                                                                                                                           | 26-35 years  | 562                                             | <div><div></div></div> 12.0% |
| 3                                                                                                                                                           | 36-45 years  | 724                                             | <div><div></div></div> 15.4% |
| 4                                                                                                                                                           | 46-55 years  | 925                                             | <div><div></div></div> 19.7% |
| 5                                                                                                                                                           | 56-65 years  | 1116                                            | <div><div></div></div> 23.8% |
| 6                                                                                                                                                           | 66-75 years  | 872                                             | <div><div></div></div> 18.6% |
| 7                                                                                                                                                           | 75 and above | 217                                             | <div><div></div></div> 4.6%  |
| Warning: these figures indicate the number of cases found in the data file. They cannot be interpreted as summary statistics of the population of interest. |              |                                                 |                              |
| # r7P5_2: Age                                                                                                                                               |              |                                                 |                              |
| Information                                                                                                                                                 |              | [Type= discrete] [Format=numeric] [Missing=*]   |                              |
| Statistics [NW/ W]                                                                                                                                          |              | [Valid=4689 /-] [Invalid=0 /-]                  |                              |
| Value                                                                                                                                                       | Label        | Cases                                           | Percentage                   |
| 1                                                                                                                                                           | 18-29 years  | 498                                             | <div><div></div></div> 10.6% |
| 2                                                                                                                                                           | 30-59 years  | 2409                                            | <div><div></div></div> 51.4% |
| 3                                                                                                                                                           | 60 and above | 1782                                            | <div><div></div></div> 38.0% |
| Warning: these figures indicate the number of cases found in the data file. They cannot be interpreted as summary statistics of the population of interest. |              |                                                 |                              |
| # r7Weight1: Weight based on variables P3, P5_2 and P1. See documentation report                                                                            |              |                                                 |                              |
| Information                                                                                                                                                 |              | [Type= continuous] [Format=numeric] [Missing=*] |                              |
| Statistics [NW/ W]                                                                                                                                          |              | [Valid=4689 /-] [Invalid=0 /-]                  |                              |
| # r7Weight2: Weight based on variables P3, P5_2, P4_1 and P1. See documentation report                                                                      |              |                                                 |                              |
| Information                                                                                                                                                 |              | [Type= continuous] [Format=numeric] [Missing=*] |                              |
| Statistics [NW/ W]                                                                                                                                          |              | [Valid=4689 /-] [Invalid=0 /-]                  |                              |

## Appendix

### R7PAD14\_6rows – with endorsements

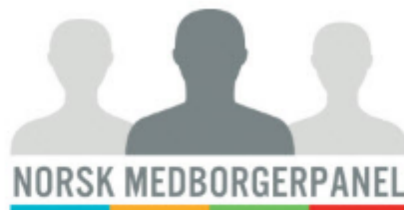

**Vi ønsker å studere hvilke mediasaker folk leser. Under er noen tenkte saker vi har laget som minner om de man kan finne i norske nettaviser. Vennligst les alle overskriftene nøye og se for deg at sakene er ekte.**

**Hvis du var nødt til å lese 3 saker, hvilke saker ville du foretrukket å bruke tiden din på?**

|                          | Kilde             | Anbefalinger i sosiale medier | Overskrift                                                                                  |
|--------------------------|-------------------|-------------------------------|---------------------------------------------------------------------------------------------|
| <input type="checkbox"/> | Aftenposten       | 0 personer anbefaler          | Disse TV-ene kommer verst ut i vår nye test                                                 |
| <input type="checkbox"/> | Dagbladet         | 1211 personer anbefaler       | Frp-politiker fordømmes etter Facebook-innlegg: «vi trenger flere muslimer i norske skoler» |
| <input type="checkbox"/> | Dagens Næringsliv | 1054 personer anbefaler       | Tror Norge spiller uavgjort i morgendagens fotballkamp                                      |
| <input type="checkbox"/> | Klassekampen      | 106 personer anbefaler        | Lokal Mdg-politiker – vil ta imot 5000 nye flyktninger                                      |
| <input type="checkbox"/> | Aftenposten       | 0 personer anbefaler          | Sp-politiker får kjeft for forslag som vil øke inntektsforskjellene                         |
| <input type="checkbox"/> | Dagens Næringsliv | 98 personer anbefaler         | Lokal Mdg-politiker skjelles ut – vil ta imot 5000 nye flyktninger                          |

### R7PAD14\_4rows – without endorsements

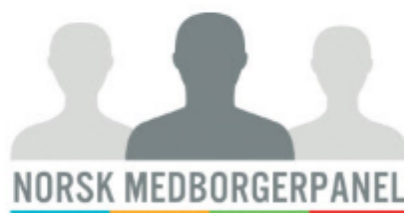

**Vi ønsker å studere hvilke mediasaker folk leser. Under er noen tenkte saker vi har laget som minner om de man kan finne i norske nettaviser. Vennligst les alle overskriftene nøye og se for deg at sakene er ekte.**

**Hvis du var nødt til å lese 3 saker, hvilke saker ville du foretrukket å bruke tiden din på?**

|                          | Kilde             | Overskrift                                                                    |
|--------------------------|-------------------|-------------------------------------------------------------------------------|
| <input type="checkbox"/> | VG                | Roser forslag fra Sv-topp som vil øke lønnsforskjeller                        |
| <input type="checkbox"/> | Dagens Næringsliv | Venstre-topp presser på for å gi NAV-penger til Syriske flyktninger, får refs |
| <input type="checkbox"/> | Dagens Næringsliv | Mdg-representant vil åpne for at noen private skoler skal kunne ta ut profit  |
| <input type="checkbox"/> | Aftenposten       | Rødt-politiker får skryt for forslag som vil øke inntektsforskjellene         |

Neste

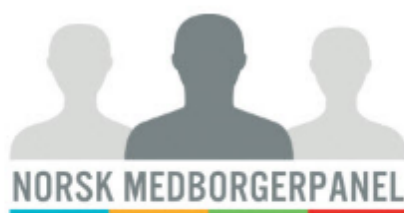

**Vi ønsker å studere hvilke mediesaker folk leser. Under er noen tenkte saker vi har laget som minner om de man kan finne i norske nettaviser. Vennligst les alle overskriftene nøye og se for deg at sakene er ekte.**

**Hvis du var nødt til å lese 2 saker, hvilke saker ville du foretrukket å bruke tiden din på?**

**Overskrift**

- ☐ Parti-profil møter begeistring - mener at kommersielle skoler bør forbys
- ☐ Høyre-politiker med homovennlig lovforslag
- ☐ Politiker på Facebook: «Homofile par MÅ få like rettigheter som heterofile»
- ☐ Venstre-topp: Vil innføre eiendomsskatt i alle norske byer.

Neste

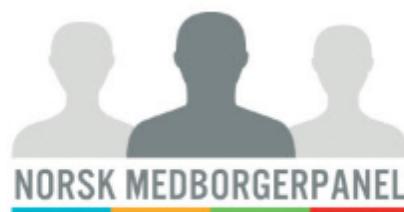

**Vi ønsker å studere hvilke mediesaker folk leser. Under er noen tenkte saker vi har laget som minner om de man kan finne i norske nettaviser. Vennligst les alle overskriftene nøye og se for deg at sakene er ekte.**

**Hvis du var nødt til å lese 1 sak, hvilken sak ville du foretrukket å bruke tiden din på?**

| Kilde                                      | Overskrift                                                                                         |
|--------------------------------------------|----------------------------------------------------------------------------------------------------|
| <input type="checkbox"/> Dagens Næringsliv | Frp-topp vil gi mer til de rike - blir refset                                                      |
| <input type="checkbox"/> TV2               | Sp-topp truer med å ta NAV-penger fra Syriske flyktinger, får refs                                 |
| <input type="checkbox"/> Dagbladet         | Mdg-politiker mener flyktinger ikke bør ha samme rett til sosialhjelp som nordmenn, blir skjelt ut |
| <input type="checkbox"/> VG                | Frp-profil møter begeistring for forslag om flere privatskoler i Norge                             |

Neste

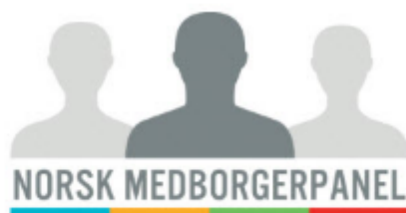

1 av 3

Folk har ulike politiske holdninger, og noen ganger er deres holdninger relatert til deres bakgrunn. Under har vi laget to tenkte politikere med forskjellig bakgrunn. Vi ønsker å vite hvilken av disse to du tipper vil være mest enig i påstanden under.

|                 | Politiker 1 | Politiker 2 |
|-----------------|-------------|-------------|
| Alder           | 60 år       | 50 år       |
| Kjønn           | Mann        | Mann        |
| Bosted          | Sørlandet   | Oslo        |
| Sivilstatus     | Bor alene   | Bor alene   |
| Utdanning       | Universitet | Grunnskole  |
| Religion        | Ingen       | Ingen       |
| Arbeidserfaring | Bonde       | Bonde       |

Vennligst velg hvem du tror er mest enig i følgende påstand:  
«Staten bør bidra til å redusere inntektsforskjeller i samfunnet.»

Politiker 1    Politiker 2

Neste

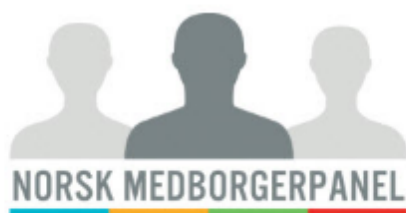

Vi er opptatt av å forstå hvordan folk oppfører seg i økonomiske valgsituasjoner. Vi vil derfor be deg om å ta én anonym beslutning hvor du kan trekkes til å motta penger.

Du og en annen tilfeldig person kan velge mellom en **gul** eller **blå** boks.

Hvis begge velger den gule boksen får dere 1000 kroner hver. Hvis du velger blå og den andre gul får du 1500 kroner og den andre får 0 kroner. Hvis begge velger blå får dere 500 kroner hver. Uansett hva den andre gjør tjener du mest på å velge blå. Vi trekker ut ti personer som mottar penger.

Neste

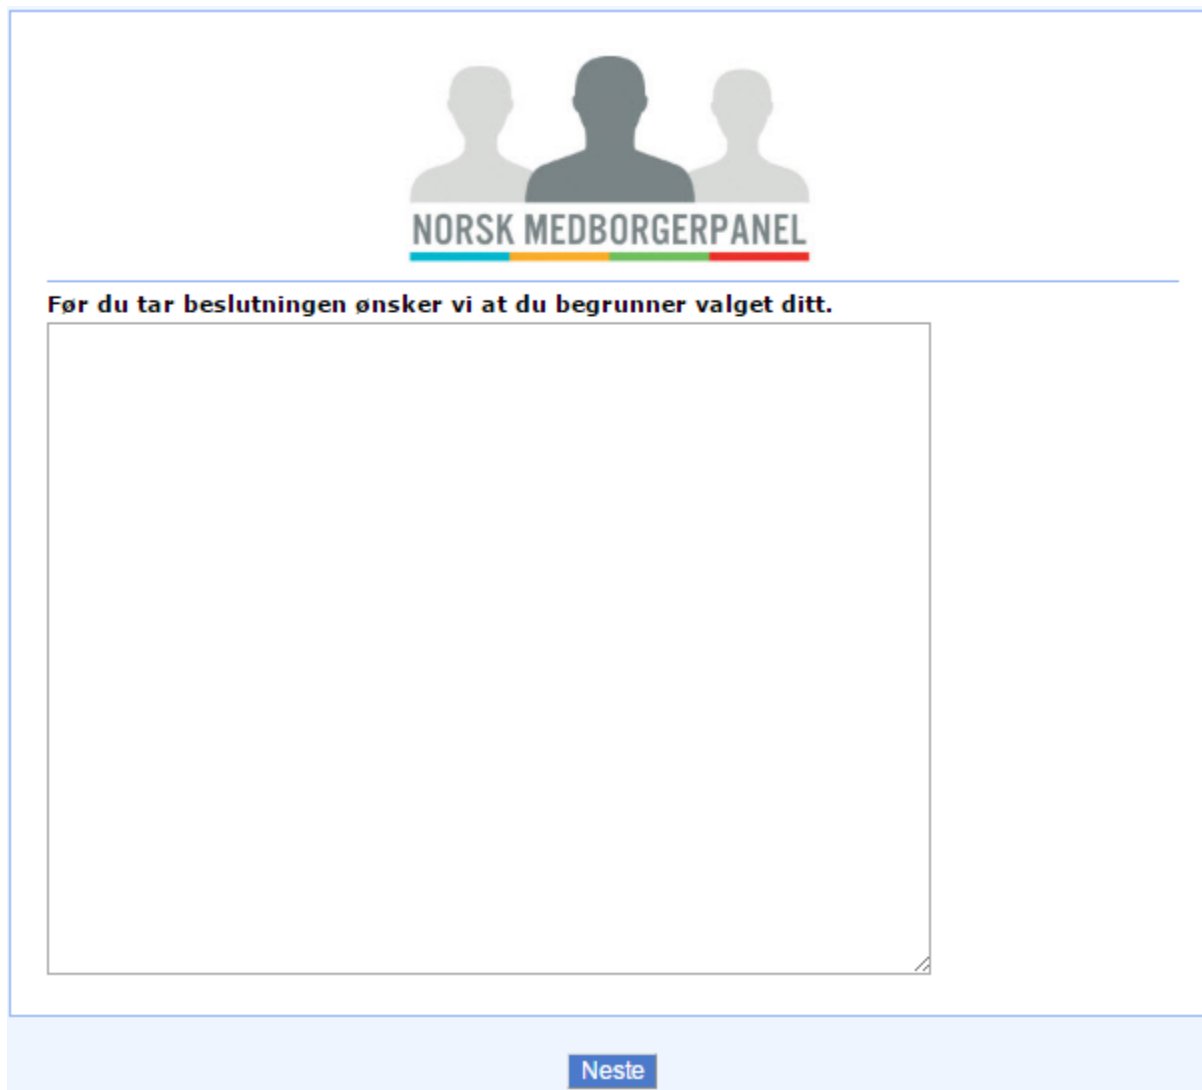

---

**Før du tar beslutningen ønsker vi at du begrunner valget ditt.**

Neste

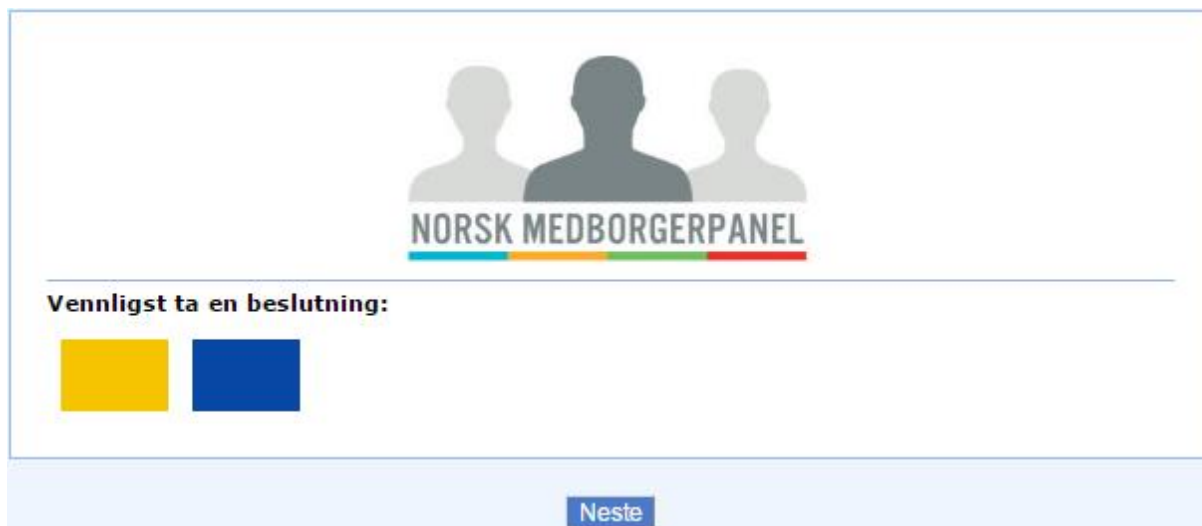

---

**Vennligst ta en beslutning:**



Neste
