# Supplementary material
Source: publisher figshare collection journal article supplement (https://sage.figshare.com/ndownloader/files/14963900)

Against EU Membership

Don't know

For EU Membership

**Outcome**

Not shown

For EU Membership won

Against EU Membership won

**Size of majority**

Not shown

70%

55%

51%

**Size of turnout**

Not shown

85%

53%

47%

35%

-60 -40 -20 0 20 40 60 -60 -40 -20 0 20 40 60 -60 -40 -20 0 20 40 60

Marginal effect, should follow referendum (%)

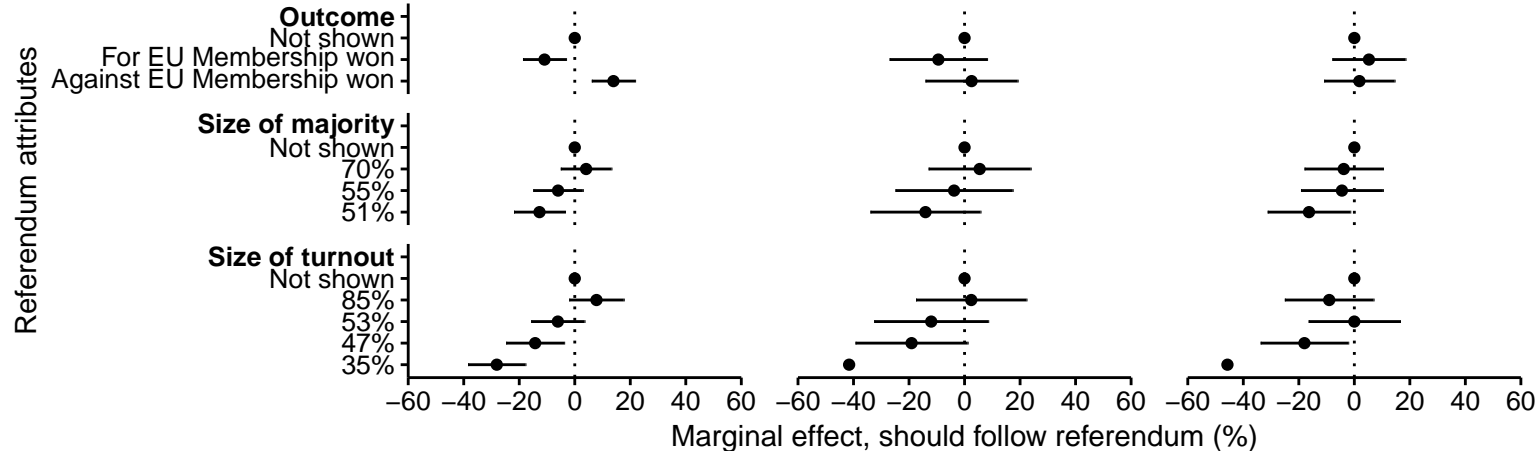

Supplement: Supplementary file 9 [file 14963900]
