# Supplementary material
Source: publisher figshare collection journal article supplement (https://sage.figshare.com/ndownloader/files/14963900)

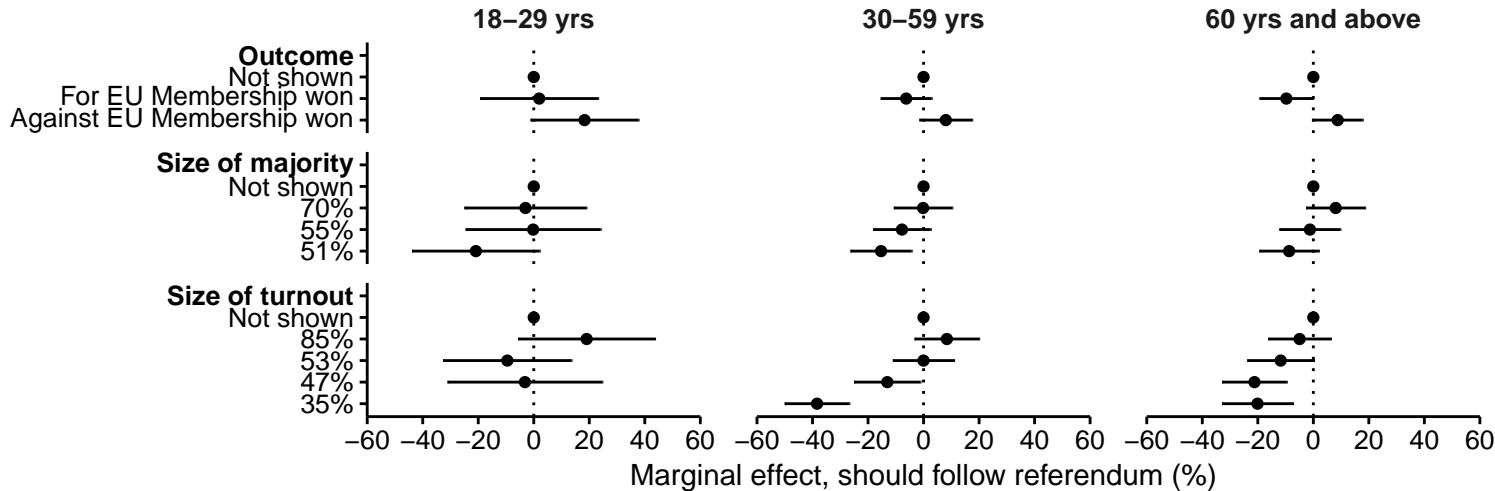

Supplement: Supplementary file 2 [file 14963900]

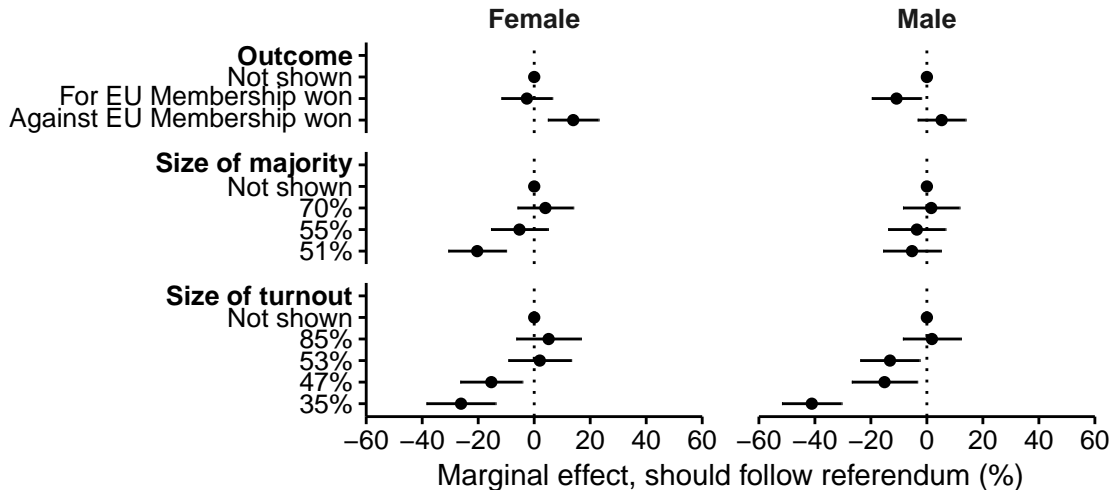

Supplement: Supplementary file 3 [file 14963900]

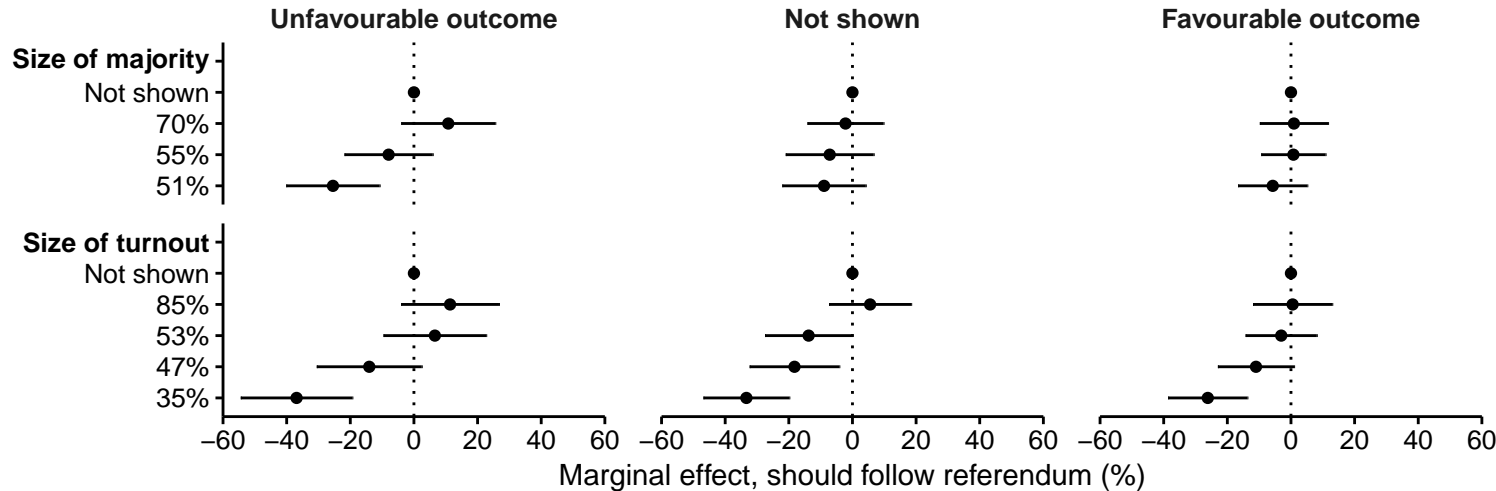

Supplement: Supplementary file 4 [file 14963900]

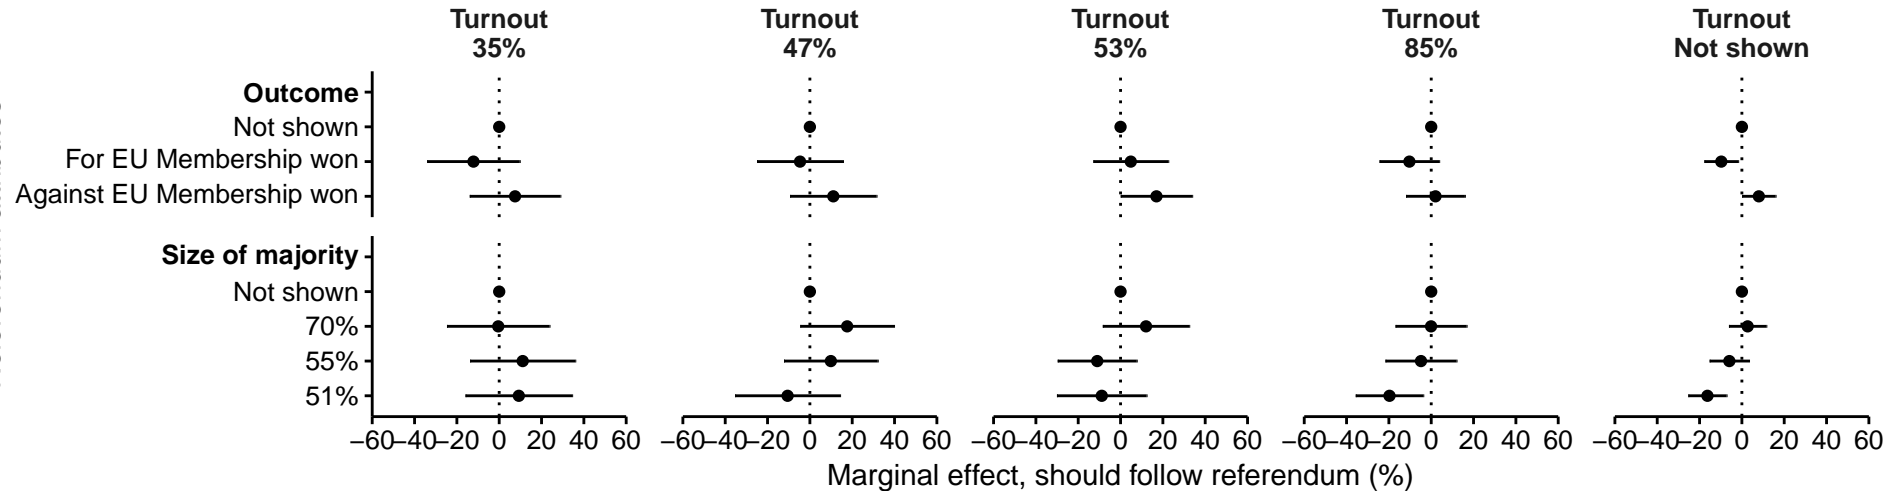

Supplement: Supplementary file 6 [file 14963900]

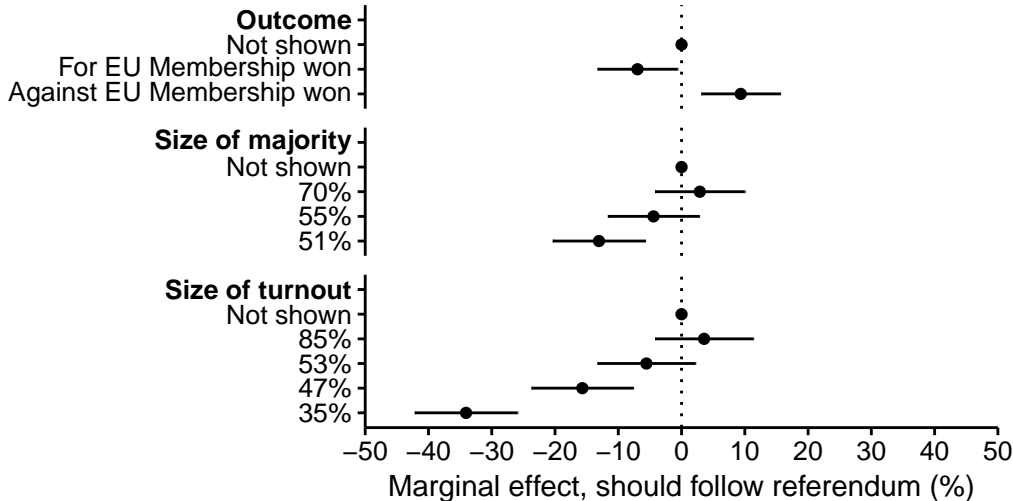

Supplement: Supplementary file 7 [file 14963900]

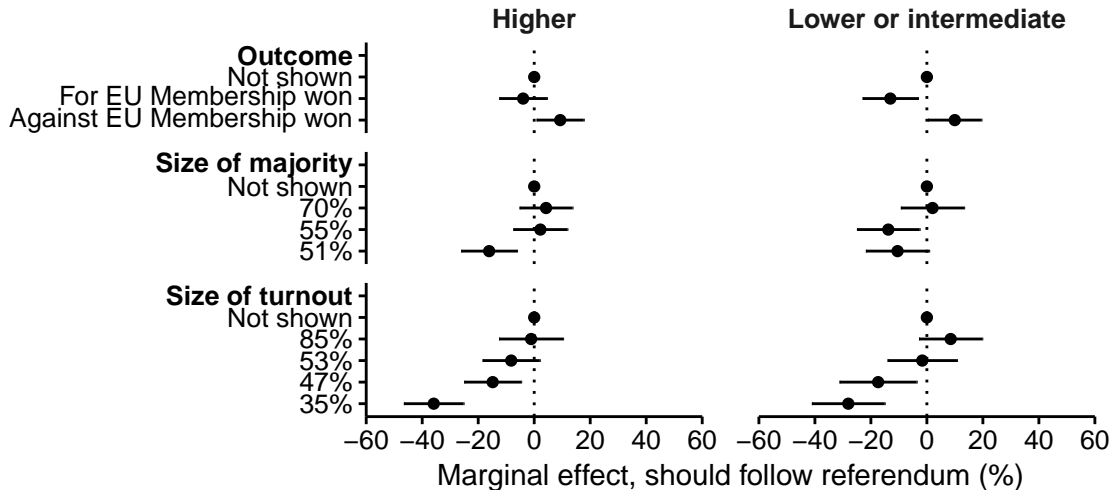

Supplement: Supplementary file 10 [file 14963900]

# Unfavourable outcome

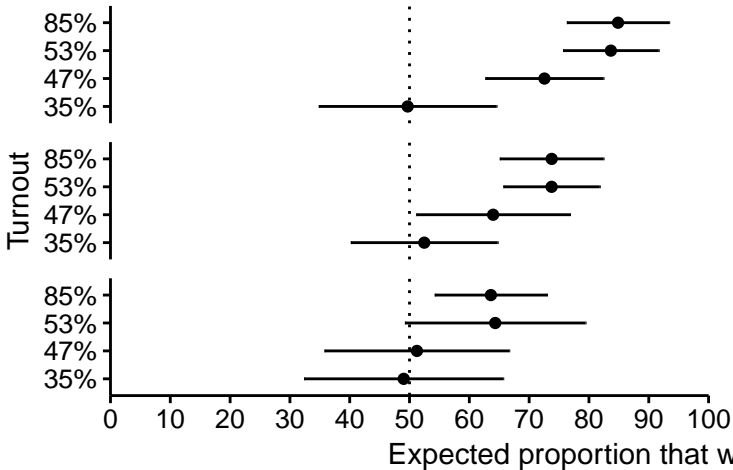

# Favourable outcome

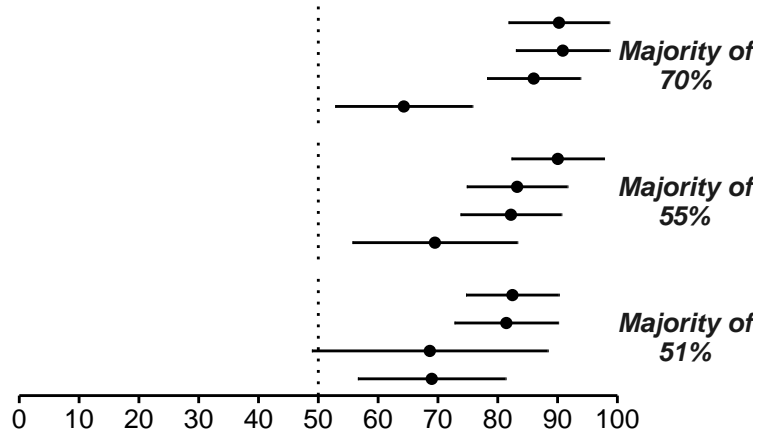

**Majority of 70%**

**Majority of 55%**

**Majority of 51%**

Supplement: Supplementary file 11 [file 14963900]

# Unfavourable outcome

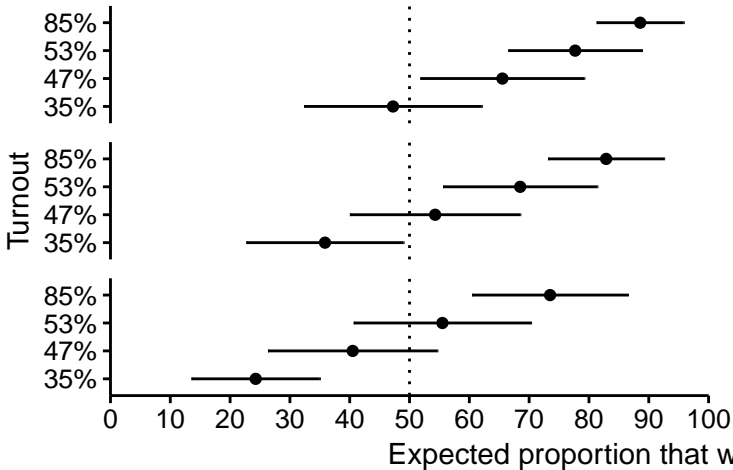

# Favourable outcome

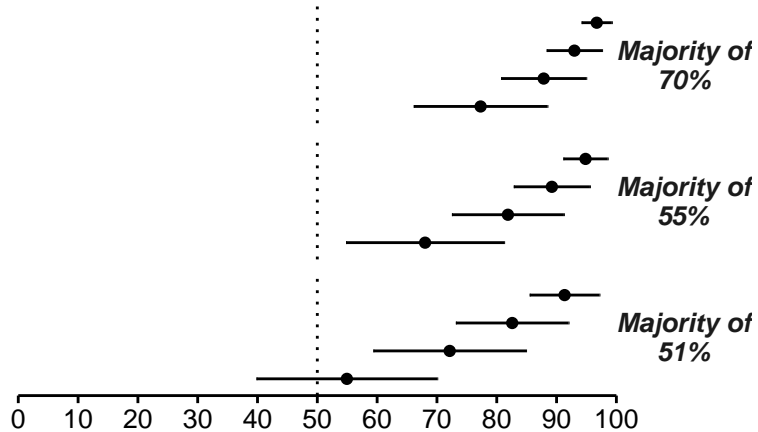

Supplement: Supplementary file 12 [file 14963900]

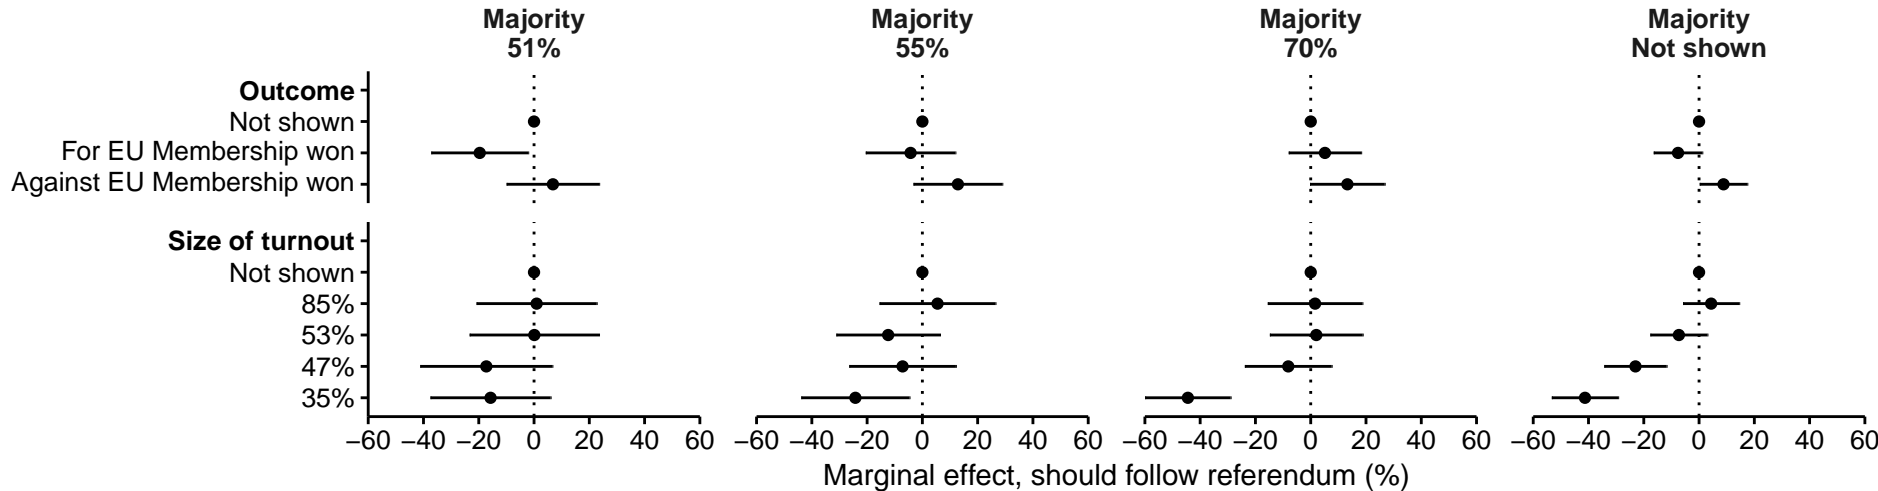

Supplement: Supplementary file 13 [file 14963900]
